# Supplementary material for: Toward the human cellular microRNAome
Source: HighWire-hosted journal article supplement (doi:10.1101/gr.222067.117), 2017-09-06
Supplement: Supplemental_Table_S1.xlsx [file Supplemental_Table_S1.xlsx]

## Sheet: Not identified
MicroRNAs Not Detected
hsa-miR-1178-5p
hsa-miR-1182
hsa-miR-1183
hsa-miR-1199-3p
hsa-miR-1202
hsa-miR-1203
hsa-miR-1204
hsa-miR-1205
hsa-miR-1206
hsa-miR-1207-3p
hsa-miR-1207-5p
hsa-miR-1238-5p
hsa-miR-1250-3p
hsa-miR-1261
hsa-miR-1279
hsa-miR-1281
hsa-miR-1301-5p
hsa-miR-1321
hsa-miR-1469
hsa-miR-1470
hsa-miR-1471
hsa-miR-1539
hsa-miR-198
hsa-miR-2052
hsa-miR-2053
hsa-miR-2054
hsa-miR-2861
hsa-miR-3151-3p
hsa-miR-3156-3p
hsa-miR-3169
hsa-miR-3185
hsa-miR-3201
hsa-miR-325
hsa-miR-3606-3p
hsa-miR-3618
hsa-miR-3621
hsa-miR-3622b-5p
hsa-miR-3649
hsa-miR-3655
hsa-miR-3658
hsa-miR-3665
hsa-miR-3666
hsa-miR-3669
hsa-miR-3670
hsa-miR-3671
hsa-miR-3673
hsa-miR-3689b-3p
hsa-miR-3689d
hsa-miR-3713
hsa-miR-3714
hsa-miR-3972
hsa-miR-3973
hsa-miR-3974
hsa-miR-3975
hsa-miR-3976
hsa-miR-3977
hsa-miR-3978
hsa-miR-4251
hsa-miR-4252
hsa-miR-4253
hsa-miR-4255
hsa-miR-4256
hsa-miR-4257
hsa-miR-4258
hsa-miR-4259
hsa-miR-4260
hsa-miR-4261
hsa-miR-4262
hsa-miR-4263
hsa-miR-4264
hsa-miR-4265
hsa-miR-4266
hsa-miR-4267
hsa-miR-4268
hsa-miR-4269
hsa-miR-4270
hsa-miR-4271
hsa-miR-4272
hsa-miR-4273
hsa-miR-4274
hsa-miR-4275
hsa-miR-4276
hsa-miR-4277
hsa-miR-4278
hsa-miR-4279
hsa-miR-4280
hsa-miR-4282
hsa-miR-4283
hsa-miR-4285
hsa-miR-4287
hsa-miR-4288
hsa-miR-4290
hsa-miR-4291
hsa-miR-4293
hsa-miR-4294
hsa-miR-4295
hsa-miR-4296
hsa-miR-4297
hsa-miR-4298
hsa-miR-4299
hsa-miR-4300
hsa-miR-4301
hsa-miR-4302
hsa-miR-4303
hsa-miR-4304
hsa-miR-4305
hsa-miR-4307
hsa-miR-4308
hsa-miR-4309
hsa-miR-4310
hsa-miR-4311
hsa-miR-4313
hsa-miR-4314
hsa-miR-4316
hsa-miR-4317
hsa-miR-4318
hsa-miR-4319
hsa-miR-4320
hsa-miR-4321
hsa-miR-4322
hsa-miR-4323
hsa-miR-4325
hsa-miR-4327
hsa-miR-4328
hsa-miR-4329
hsa-miR-4441
hsa-miR-4447
hsa-miR-4452
hsa-miR-4456
hsa-miR-4468
hsa-miR-4472
hsa-miR-4474-5p
hsa-miR-4494
hsa-miR-4495
hsa-miR-4524b-5p
hsa-miR-4534
hsa-miR-4535
hsa-miR-4538
hsa-miR-4539
hsa-miR-4540
hsa-miR-4650-5p
hsa-miR-4665-3p
hsa-miR-4666b
hsa-miR-4693-3p
hsa-miR-4693-5p
hsa-miR-4704-5p
hsa-miR-4711-3p
hsa-miR-4712-5p
hsa-miR-4716-5p
hsa-miR-4718
hsa-miR-4720-3p
hsa-miR-4738-5p
hsa-miR-4771
hsa-miR-4798-3p
hsa-miR-548bb-3p
hsa-miR-548bb-5p
hsa-miR-553
hsa-miR-557
hsa-miR-5572
hsa-miR-5591-5p
hsa-miR-563
hsa-miR-566
hsa-miR-568
hsa-miR-5739
hsa-miR-591
hsa-miR-593-3p
hsa-miR-593-5p
hsa-miR-595
hsa-miR-596
hsa-miR-601
hsa-miR-6068
hsa-miR-6069
hsa-miR-6070
hsa-miR-6071
hsa-miR-6072
hsa-miR-6073
hsa-miR-6074
hsa-miR-6075
hsa-miR-6076
hsa-miR-6078
hsa-miR-6079
hsa-miR-608
hsa-miR-6080
hsa-miR-6081
hsa-miR-6082
hsa-miR-6083
hsa-miR-6085
hsa-miR-6086
hsa-miR-6088
hsa-miR-6090
hsa-miR-6124
hsa-miR-6126
hsa-miR-6131
hsa-miR-614
hsa-miR-6165
hsa-miR-617
hsa-miR-619-3p
hsa-miR-620
hsa-miR-621
hsa-miR-630
hsa-miR-631
hsa-miR-633
hsa-miR-634
hsa-miR-635
hsa-miR-645
hsa-miR-648
hsa-miR-6506-3p
hsa-miR-661
hsa-miR-6752-5p
hsa-miR-6767-3p
hsa-miR-6778-3p
hsa-miR-6806-5p
hsa-miR-6808-5p
hsa-miR-6828-3p
hsa-miR-6829-3p
hsa-miR-6835-3p
hsa-miR-6848-3p
hsa-miR-6861-3p
hsa-miR-6867-3p
hsa-miR-711
hsa-miR-7150
hsa-miR-7153-3p
hsa-miR-7160-5p
hsa-miR-718
hsa-miR-7515
hsa-miR-759
hsa-miR-761
hsa-miR-762
hsa-miR-8054
hsa-miR-8055
hsa-miR-8056
hsa-miR-8057
hsa-miR-8059
hsa-miR-8060
hsa-miR-8062
hsa-miR-8063
hsa-miR-8064
hsa-miR-8065
hsa-miR-8066
hsa-miR-8067
hsa-miR-8068
hsa-miR-8069
hsa-miR-8070
hsa-miR-8071
hsa-miR-8073
hsa-miR-8074
hsa-miR-8075
hsa-miR-8076
hsa-miR-8077
hsa-miR-8079
hsa-miR-8080
hsa-miR-8081
hsa-miR-8082
hsa-miR-8083
hsa-miR-8084
hsa-miR-8086
hsa-miR-8087
hsa-miR-8088
hsa-miR-8089
hsa-miR-920
hsa-miR-924
hsa-miR-938
hsa-miR-9500

## Sheet: Sheet1
List All	List All2	List A	List B	List C
hsa-miR-1178-5p	hsa-miR-1178-5p	hsa-miR-1178-5p	hsa-miR-1178-5p	hsa-miR-1178-5p
hsa-miR-1182	hsa-miR-1182	hsa-miR-1182	hsa-miR-1181	hsa-miR-1181
hsa-miR-1183	hsa-miR-1183	hsa-miR-1183	hsa-miR-1182	hsa-miR-1182
hsa-miR-1184	hsa-miR-1184	hsa-miR-1184	hsa-miR-1183	hsa-miR-1183
hsa-miR-1199-3p	hsa-miR-1199-3p	hsa-miR-1199-3p	hsa-miR-1199-3p	hsa-miR-1184
hsa-miR-1199-5p	hsa-miR-1199-5p	hsa-miR-1199-5p	hsa-miR-1200	hsa-miR-1199-3p
hsa-miR-1200	hsa-miR-1200	hsa-miR-1200	hsa-miR-1202	hsa-miR-1199-5p
hsa-miR-1202	hsa-miR-1202	hsa-miR-1202	hsa-miR-1203	hsa-miR-1202
hsa-miR-1203	hsa-miR-1203	hsa-miR-1203	hsa-miR-1204	hsa-miR-1203
hsa-miR-1204	hsa-miR-1204	hsa-miR-1204	hsa-miR-1205	hsa-miR-1204
hsa-miR-1205	hsa-miR-1205	hsa-miR-1205	hsa-miR-1206	hsa-miR-1205
hsa-miR-1206	hsa-miR-1206	hsa-miR-1206	hsa-miR-1207-3p	hsa-miR-1206
hsa-miR-1207-3p	hsa-miR-1207-3p	hsa-miR-1207-3p	hsa-miR-1207-5p	hsa-miR-1207-3p
hsa-miR-1207-5p	hsa-miR-1207-5p	hsa-miR-1207-5p	hsa-miR-1208	hsa-miR-1207-5p
hsa-miR-1208	hsa-miR-1208	hsa-miR-1208	hsa-miR-122-3p	hsa-miR-1227-5p
hsa-miR-1236-3p	hsa-miR-1236-3p	hsa-miR-1236-3p	hsa-miR-1225-3p	hsa-miR-1231
hsa-miR-1238-5p	hsa-miR-1238-5p	hsa-miR-1238-5p	hsa-miR-1227-5p	hsa-miR-1236-5p
hsa-miR-1250-3p	hsa-miR-1250-3p	hsa-miR-1250-3p	hsa-miR-1231	hsa-miR-1238-5p
hsa-miR-1261	hsa-miR-1261	hsa-miR-1261	hsa-miR-1238-5p	hsa-miR-1250-3p
hsa-miR-1273a	hsa-miR-1273a	hsa-miR-1273a	hsa-miR-1250-3p	hsa-miR-1261
hsa-miR-1279	hsa-miR-1279	hsa-miR-1279	hsa-miR-1261	hsa-miR-1266-3p
hsa-miR-1281	hsa-miR-1281	hsa-miR-1281	hsa-miR-1264	hsa-miR-1273a
hsa-miR-1297	hsa-miR-1297	hsa-miR-1297	hsa-miR-1279	hsa-miR-1279
hsa-miR-1301-5p	hsa-miR-1301-5p	hsa-miR-1301-5p	hsa-miR-1281	hsa-miR-1281
hsa-miR-1321	hsa-miR-1321	hsa-miR-1321	hsa-miR-1282	hsa-miR-1282
hsa-miR-1324	hsa-miR-1324	hsa-miR-1324	hsa-miR-1297	hsa-miR-1295b-3p
hsa-miR-1469	hsa-miR-1469	hsa-miR-1469	hsa-miR-1301-5p	hsa-miR-1301-5p
hsa-miR-1470	hsa-miR-1470	hsa-miR-1470	hsa-miR-130a-5p	hsa-miR-1321
hsa-miR-1471	hsa-miR-1471	hsa-miR-1471	hsa-miR-1321	hsa-miR-1469
hsa-miR-1539	hsa-miR-1539	hsa-miR-1539	hsa-miR-1322	hsa-miR-1470
hsa-miR-1911-3p	hsa-miR-1911-3p	hsa-miR-1911-3p	hsa-miR-1324	hsa-miR-1471
hsa-miR-198	hsa-miR-198	hsa-miR-198	hsa-miR-1469	hsa-miR-147a
hsa-miR-2052	hsa-miR-2052	hsa-miR-2052	hsa-miR-1470	hsa-miR-1539
hsa-miR-2053	hsa-miR-2053	hsa-miR-2053	hsa-miR-1471	hsa-miR-1587
hsa-miR-2054	hsa-miR-2054	hsa-miR-2054	hsa-miR-1539	hsa-miR-1825
hsa-miR-2117	hsa-miR-2117	hsa-miR-2117	hsa-miR-1587	hsa-miR-1827
hsa-miR-2861	hsa-miR-2861	hsa-miR-2861	hsa-miR-1912	hsa-miR-198
hsa-miR-2909	hsa-miR-2909	hsa-miR-2909	hsa-miR-196a-3p	hsa-miR-203a/203b-5p
hsa-miR-297	hsa-miR-297	hsa-miR-297	hsa-miR-198	hsa-miR-203b-3p
hsa-miR-298	hsa-miR-298	hsa-miR-298	hsa-miR-203a/203b-5p	hsa-miR-2052
hsa-miR-302e	hsa-miR-302e	hsa-miR-302e	hsa-miR-2052	hsa-miR-2053
hsa-miR-302f	hsa-miR-302f	hsa-miR-302f	hsa-miR-2053	hsa-miR-2054
hsa-miR-3119	hsa-miR-3119	hsa-miR-3119	hsa-miR-2054	hsa-miR-2861
hsa-miR-3121-5p	hsa-miR-3121-5p	hsa-miR-3121-5p	hsa-miR-208a-3p	hsa-miR-300
hsa-miR-3147	hsa-miR-3147	hsa-miR-3147	hsa-miR-208a-5p	hsa-miR-3118
hsa-miR-3151-3p	hsa-miR-3151-3p	hsa-miR-3151-3p	hsa-miR-208b-3p	hsa-miR-3119
hsa-miR-3156-3p	hsa-miR-3156-3p	hsa-miR-3156-3p	hsa-miR-208b-5p	hsa-miR-3135b
hsa-miR-3160-5p	hsa-miR-3160-5p	hsa-miR-3160-5p	hsa-miR-2117	hsa-miR-3136-3p
hsa-miR-3168	hsa-miR-3168	hsa-miR-3168	hsa-miR-2392	hsa-miR-3140-5p
hsa-miR-3169	hsa-miR-3169	hsa-miR-3169	hsa-miR-2861	hsa-miR-3147
hsa-miR-3185	hsa-miR-3185	hsa-miR-3185	hsa-miR-2909	hsa-miR-3151-3p
hsa-miR-3201	hsa-miR-3201	hsa-miR-3201	hsa-miR-298	hsa-miR-3156-3p
hsa-miR-325	hsa-miR-325	hsa-miR-325	hsa-miR-300	hsa-miR-3168
hsa-miR-3606-3p	hsa-miR-3606-3p	hsa-miR-3606-3p	hsa-miR-302b-5p	hsa-miR-3169
hsa-miR-3618	hsa-miR-3618	hsa-miR-3618	hsa-miR-302e	hsa-miR-3185
hsa-miR-3621	hsa-miR-3621	hsa-miR-3621	hsa-miR-302f	hsa-miR-3201
hsa-miR-3649	hsa-miR-3649	hsa-miR-3649	hsa-miR-3117-5p	hsa-miR-325
hsa-miR-3650	hsa-miR-3650	hsa-miR-3650	hsa-miR-3117-5p	hsa-miR-3606-3p
hsa-miR-3658	hsa-miR-3658	hsa-miR-3658	hsa-miR-3118	hsa-miR-3606-5p
hsa-miR-3665	hsa-miR-3665	hsa-miR-3665	hsa-miR-3123	hsa-miR-3618
hsa-miR-3666	hsa-miR-3666	hsa-miR-3666	hsa-miR-3130-3p	hsa-miR-3621
hsa-miR-3669	hsa-miR-3669	hsa-miR-3669	hsa-miR-3135b	hsa-miR-3622b-5p
hsa-miR-367-5p	hsa-miR-367-5p	hsa-miR-367-5p	hsa-miR-3142	hsa-miR-3649
hsa-miR-3670	hsa-miR-3670	hsa-miR-3670	hsa-miR-3151-3p	hsa-miR-3650
hsa-miR-3671	hsa-miR-3671	hsa-miR-3671	hsa-miR-3152-3p	hsa-miR-3655
hsa-miR-3673	hsa-miR-3673	hsa-miR-3673	hsa-miR-3156-3p	hsa-miR-3658
hsa-miR-3678-5p	hsa-miR-3678-5p	hsa-miR-3678-5p	hsa-miR-3159	hsa-miR-3665
hsa-miR-3682-5p	hsa-miR-3682-5p	hsa-miR-3682-5p	hsa-miR-3161	hsa-miR-3666
hsa-miR-3686	hsa-miR-3686	hsa-miR-3686	hsa-miR-3169	hsa-miR-3669
hsa-miR-3689a-3p	hsa-miR-3689a-3p	hsa-miR-3689a-3p	hsa-miR-3185	hsa-miR-3670
hsa-miR-3689a-5p	hsa-miR-3689a-5p	hsa-miR-3689a-5p	hsa-miR-3201	hsa-miR-3671
hsa-miR-3689b-3p	hsa-miR-3689b-3p	hsa-miR-3689b-3p	hsa-miR-325	hsa-miR-3672
hsa-miR-3689b-5p	hsa-miR-3689b-5p	hsa-miR-3689b-5p	hsa-miR-3606-3p	hsa-miR-3673
hsa-miR-3689c	hsa-miR-3689c	hsa-miR-3689c	hsa-miR-3606-5p	hsa-miR-3674
hsa-miR-3689d	hsa-miR-3689d	hsa-miR-3689d	hsa-miR-3612	hsa-miR-3681-3p
hsa-miR-3689e	hsa-miR-3689e	hsa-miR-3689e	hsa-miR-3618	hsa-miR-3682-5p
hsa-miR-3689f	hsa-miR-3689f	hsa-miR-3689f	hsa-miR-3621	hsa-miR-3683
hsa-miR-3692-5p	hsa-miR-3692-5p	hsa-miR-3692-5p	hsa-miR-3622b-3p	hsa-miR-3689a-3p
hsa-miR-3713	hsa-miR-3713	hsa-miR-3713	hsa-miR-3622b-5p	hsa-miR-3689a-5p
hsa-miR-3714	hsa-miR-3714	hsa-miR-3714	hsa-miR-3622b-5p	hsa-miR-3689b-3p
hsa-miR-384	hsa-miR-384	hsa-miR-384	hsa-miR-3649	hsa-miR-3689b-5p
hsa-miR-3972	hsa-miR-3972	hsa-miR-3972	hsa-miR-3655	hsa-miR-3689c
hsa-miR-3973	hsa-miR-3973	hsa-miR-3973	hsa-miR-3655	hsa-miR-3689d
hsa-miR-3974	hsa-miR-3974	hsa-miR-3974	hsa-miR-3658	hsa-miR-3689e
hsa-miR-3975	hsa-miR-3975	hsa-miR-3975	hsa-miR-3665	hsa-miR-3689f
hsa-miR-3976	hsa-miR-3976	hsa-miR-3976	hsa-miR-3666	hsa-miR-3713
hsa-miR-3977	hsa-miR-3977	hsa-miR-3977	hsa-miR-3669	hsa-miR-3714
hsa-miR-3978	hsa-miR-3978	hsa-miR-3978	hsa-miR-3670	hsa-miR-378h
hsa-miR-4251	hsa-miR-4251	hsa-miR-4251	hsa-miR-3671	hsa-miR-378j
hsa-miR-4252	hsa-miR-4252	hsa-miR-4252	hsa-miR-3673	hsa-miR-3912-5p
hsa-miR-4253	hsa-miR-4253	hsa-miR-4253	hsa-miR-367-5p	hsa-miR-3915
hsa-miR-4255	hsa-miR-4255	hsa-miR-4255	hsa-miR-3683	hsa-miR-3922-3p
hsa-miR-4256	hsa-miR-4256	hsa-miR-4256	hsa-miR-3689b-3p	hsa-miR-3926
hsa-miR-4257	hsa-miR-4257	hsa-miR-4257	hsa-miR-3689d	hsa-miR-3972
hsa-miR-4258	hsa-miR-4258	hsa-miR-4258	hsa-miR-3713	hsa-miR-3973
hsa-miR-4259	hsa-miR-4259	hsa-miR-4259	hsa-miR-3714	hsa-miR-3974
hsa-miR-4260	hsa-miR-4260	hsa-miR-4260	hsa-miR-378j	hsa-miR-3975
hsa-miR-4261	hsa-miR-4261	hsa-miR-4261	hsa-miR-384	hsa-miR-3976
hsa-miR-4262	hsa-miR-4262	hsa-miR-4262	hsa-miR-3914	hsa-miR-3977
hsa-miR-4263	hsa-miR-4263	hsa-miR-4263	hsa-miR-3915	hsa-miR-3978
hsa-miR-4264	hsa-miR-4264	hsa-miR-4264	hsa-miR-3920	hsa-miR-422a
hsa-miR-4265	hsa-miR-4265	hsa-miR-4265	hsa-miR-3921	hsa-miR-4251
hsa-miR-4266	hsa-miR-4266	hsa-miR-4266	hsa-miR-3939	hsa-miR-4252
hsa-miR-4267	hsa-miR-4267	hsa-miR-4267	hsa-miR-3960	hsa-miR-4253
hsa-miR-4268	hsa-miR-4268	hsa-miR-4268	hsa-miR-3972	hsa-miR-4255
hsa-miR-4269	hsa-miR-4269	hsa-miR-4269	hsa-miR-3973	hsa-miR-4256
hsa-miR-4270	hsa-miR-4270	hsa-miR-4270	hsa-miR-3974	hsa-miR-4257
hsa-miR-4271	hsa-miR-4271	hsa-miR-4271	hsa-miR-3975	hsa-miR-4258
hsa-miR-4272	hsa-miR-4272	hsa-miR-4272	hsa-miR-3976	hsa-miR-4259
hsa-miR-4273	hsa-miR-4273	hsa-miR-4273	hsa-miR-3977	hsa-miR-4260
hsa-miR-4274	hsa-miR-4274	hsa-miR-4274	hsa-miR-3978	hsa-miR-4261
hsa-miR-4275	hsa-miR-4275	hsa-miR-4275	hsa-miR-4251	hsa-miR-4262
hsa-miR-4276	hsa-miR-4276	hsa-miR-4276	hsa-miR-4252	hsa-miR-4263
hsa-miR-4277	hsa-miR-4277	hsa-miR-4277	hsa-miR-4253	hsa-miR-4264
hsa-miR-4278	hsa-miR-4278	hsa-miR-4278	hsa-miR-4254	hsa-miR-4265
hsa-miR-4279	hsa-miR-4279	hsa-miR-4279	hsa-miR-4255	hsa-miR-4266
hsa-miR-4280	hsa-miR-4280	hsa-miR-4280	hsa-miR-4256	hsa-miR-4267
hsa-miR-4281	hsa-miR-4281	hsa-miR-4281	hsa-miR-4257	hsa-miR-4268
hsa-miR-4282	hsa-miR-4282	hsa-miR-4282	hsa-miR-4258	hsa-miR-4269
hsa-miR-4283	hsa-miR-4283	hsa-miR-4283	hsa-miR-4259	hsa-miR-4270
hsa-miR-4285	hsa-miR-4285	hsa-miR-4285	hsa-miR-4260	hsa-miR-4271
hsa-miR-4287	hsa-miR-4287	hsa-miR-4287	hsa-miR-4261	hsa-miR-4272
hsa-miR-4288	hsa-miR-4288	hsa-miR-4288	hsa-miR-4262	hsa-miR-4273
hsa-miR-4290	hsa-miR-4290	hsa-miR-4290	hsa-miR-4263	hsa-miR-4274
hsa-miR-4291	hsa-miR-4291	hsa-miR-4291	hsa-miR-4264	hsa-miR-4275
hsa-miR-4292	hsa-miR-4292	hsa-miR-4292	hsa-miR-4265	hsa-miR-4276
hsa-miR-4293	hsa-miR-4293	hsa-miR-4293	hsa-miR-4266	hsa-miR-4277
hsa-miR-4294	hsa-miR-4294	hsa-miR-4294	hsa-miR-4267	hsa-miR-4278
hsa-miR-4295	hsa-miR-4295	hsa-miR-4295	hsa-miR-4268	hsa-miR-4279
hsa-miR-4296	hsa-miR-4296	hsa-miR-4296	hsa-miR-4269	hsa-miR-4280
hsa-miR-4297	hsa-miR-4297	hsa-miR-4297	hsa-miR-4270	hsa-miR-4282
hsa-miR-4298	hsa-miR-4298	hsa-miR-4298	hsa-miR-4271	hsa-miR-4283
hsa-miR-4299	hsa-miR-4299	hsa-miR-4299	hsa-miR-4272	hsa-miR-4285
hsa-miR-4300	hsa-miR-4300	hsa-miR-4300	hsa-miR-4273	hsa-miR-4287
hsa-miR-4301	hsa-miR-4301	hsa-miR-4301	hsa-miR-4274	hsa-miR-4288
hsa-miR-4302	hsa-miR-4302	hsa-miR-4302	hsa-miR-4275	hsa-miR-4289
hsa-miR-4303	hsa-miR-4303	hsa-miR-4303	hsa-miR-4276	hsa-miR-4290
hsa-miR-4304	hsa-miR-4304	hsa-miR-4304	hsa-miR-4277	hsa-miR-4291
hsa-miR-4305	hsa-miR-4305	hsa-miR-4305	hsa-miR-4278	hsa-miR-4292
hsa-miR-4307	hsa-miR-4307	hsa-miR-4307	hsa-miR-4279	hsa-miR-4293
hsa-miR-4308	hsa-miR-4308	hsa-miR-4308	hsa-miR-4280	hsa-miR-4294
hsa-miR-4309	hsa-miR-4309	hsa-miR-4309	hsa-miR-4281	hsa-miR-4295
hsa-miR-4310	hsa-miR-4310	hsa-miR-4310	hsa-miR-4282	hsa-miR-4296
hsa-miR-4311	hsa-miR-4311	hsa-miR-4311	hsa-miR-4283	hsa-miR-4297
hsa-miR-4312	hsa-miR-4312	hsa-miR-4312	hsa-miR-4285	hsa-miR-4298
hsa-miR-4313	hsa-miR-4313	hsa-miR-4313	hsa-miR-4287	hsa-miR-4299
hsa-miR-4314	hsa-miR-4314	hsa-miR-4314	hsa-miR-4288	hsa-miR-4300
hsa-miR-4315	hsa-miR-4315	hsa-miR-4315	hsa-miR-4289	hsa-miR-4301
hsa-miR-4316	hsa-miR-4316	hsa-miR-4316	hsa-miR-4290	hsa-miR-4302
hsa-miR-4317	hsa-miR-4317	hsa-miR-4317	hsa-miR-4291	hsa-miR-4303
hsa-miR-4318	hsa-miR-4318	hsa-miR-4318	hsa-miR-4293	hsa-miR-4304
hsa-miR-4319	hsa-miR-4319	hsa-miR-4319	hsa-miR-4294	hsa-miR-4305
hsa-miR-4320	hsa-miR-4320	hsa-miR-4320	hsa-miR-4295	hsa-miR-4307
hsa-miR-4321	hsa-miR-4321	hsa-miR-4321	hsa-miR-4296	hsa-miR-4308
hsa-miR-4322	hsa-miR-4322	hsa-miR-4322	hsa-miR-4297	hsa-miR-4309
hsa-miR-4323	hsa-miR-4323	hsa-miR-4323	hsa-miR-4298	hsa-miR-4310
hsa-miR-4325	hsa-miR-4325	hsa-miR-4325	hsa-miR-4299	hsa-miR-4311
hsa-miR-4327	hsa-miR-4327	hsa-miR-4327	hsa-miR-4300	hsa-miR-4313
hsa-miR-4328	hsa-miR-4328	hsa-miR-4328	hsa-miR-4301	hsa-miR-4314
hsa-miR-4329	hsa-miR-4329	hsa-miR-4329	hsa-miR-4302	hsa-miR-4316
hsa-miR-4330	hsa-miR-4330	hsa-miR-4330	hsa-miR-4303	hsa-miR-4317
hsa-miR-4418	hsa-miR-4418	hsa-miR-4418	hsa-miR-4304	hsa-miR-4318
hsa-miR-4419a	hsa-miR-4419a	hsa-miR-4419a	hsa-miR-4305	hsa-miR-4319
hsa-miR-4436b-5p	hsa-miR-4436b-5p	hsa-miR-4436b-5p	hsa-miR-4307	hsa-miR-4320
hsa-miR-4441	hsa-miR-4441	hsa-miR-4441	hsa-miR-4308	hsa-miR-4321
hsa-miR-4447	hsa-miR-4447	hsa-miR-4447	hsa-miR-4309	hsa-miR-4322
hsa-miR-4452	hsa-miR-4452	hsa-miR-4452	hsa-miR-4310	hsa-miR-4323
hsa-miR-4456	hsa-miR-4456	hsa-miR-4456	hsa-miR-4311	hsa-miR-4324
hsa-miR-4462	hsa-miR-4462	hsa-miR-4462	hsa-miR-4312	hsa-miR-4325
hsa-miR-4468	hsa-miR-4468	hsa-miR-4468	hsa-miR-4313	hsa-miR-4327
hsa-miR-4472	hsa-miR-4472	hsa-miR-4472	hsa-miR-4314	hsa-miR-4328
hsa-miR-4474-5p	hsa-miR-4474-5p	hsa-miR-4474-5p	hsa-miR-4315	hsa-miR-4329
hsa-miR-4475	hsa-miR-4475	hsa-miR-4475	hsa-miR-4316	hsa-miR-4428
hsa-miR-4481	hsa-miR-4481	hsa-miR-4481	hsa-miR-4317	hsa-miR-4432
hsa-miR-4483	hsa-miR-4483	hsa-miR-4483	hsa-miR-4318	hsa-miR-4436a
hsa-miR-4495	hsa-miR-4495	hsa-miR-4495	hsa-miR-4319	hsa-miR-4438
hsa-miR-4524b-3p	hsa-miR-4524b-3p	hsa-miR-4524b-3p	hsa-miR-4320	hsa-miR-4441
hsa-miR-4524b-5p	hsa-miR-4524b-5p	hsa-miR-4524b-5p	hsa-miR-4321	hsa-miR-4445-3p
hsa-miR-4527	hsa-miR-4527	hsa-miR-4527	hsa-miR-4322	hsa-miR-4445-5p
hsa-miR-4531	hsa-miR-4531	hsa-miR-4531	hsa-miR-4323	hsa-miR-4447
hsa-miR-4534	hsa-miR-4534	hsa-miR-4534	hsa-miR-4324	hsa-miR-4452
hsa-miR-4535	hsa-miR-4535	hsa-miR-4535	hsa-miR-4325	hsa-miR-4456
hsa-miR-4537	hsa-miR-4537	hsa-miR-4537	hsa-miR-4327	hsa-miR-4460
hsa-miR-4538	hsa-miR-4538	hsa-miR-4538	hsa-miR-4328	hsa-miR-4462
hsa-miR-4539	hsa-miR-4539	hsa-miR-4539	hsa-miR-4329	hsa-miR-4465
hsa-miR-4540	hsa-miR-4540	hsa-miR-4540	hsa-miR-4330	hsa-miR-4468
hsa-miR-4650-5p	hsa-miR-4650-5p	hsa-miR-4650-5p	hsa-miR-4419a	hsa-miR-4471
hsa-miR-4655-3p	hsa-miR-4655-3p	hsa-miR-4655-3p	hsa-miR-4432	hsa-miR-4472
hsa-miR-4665-3p	hsa-miR-4665-3p	hsa-miR-4665-3p	hsa-miR-4436a	hsa-miR-4474-5p
hsa-miR-4686	hsa-miR-4686	hsa-miR-4686	hsa-miR-4438	hsa-miR-4475
hsa-miR-4691-5p	hsa-miR-4691-5p	hsa-miR-4691-5p	hsa-miR-4441	hsa-miR-4480
hsa-miR-4693-3p	hsa-miR-4693-3p	hsa-miR-4693-3p	hsa-miR-4447	hsa-miR-4481
hsa-miR-4693-5p	hsa-miR-4693-5p	hsa-miR-4693-5p	hsa-miR-4452	hsa-miR-4483
hsa-miR-4694-3p	hsa-miR-4694-3p	hsa-miR-4694-3p	hsa-miR-4456	hsa-miR-4491
hsa-miR-4694-5p	hsa-miR-4694-5p	hsa-miR-4694-5p	hsa-miR-4464	hsa-miR-4494
hsa-miR-4711-3p	hsa-miR-4711-3p	hsa-miR-4711-3p	hsa-miR-4468	hsa-miR-4495
hsa-miR-4712-5p	hsa-miR-4712-5p	hsa-miR-4712-5p	hsa-miR-4472	hsa-miR-4496
hsa-miR-4718	hsa-miR-4718	hsa-miR-4718	hsa-miR-4474-5p	hsa-miR-4499
hsa-miR-4735-3p	hsa-miR-4735-3p	hsa-miR-4735-3p	hsa-miR-4478	hsa-miR-4500
hsa-miR-4738-5p	hsa-miR-4738-5p	hsa-miR-4738-5p	hsa-miR-4486	hsa-miR-4507
hsa-miR-4743-3p	hsa-miR-4743-3p	hsa-miR-4743-3p	hsa-miR-4490	hsa-miR-4509
hsa-miR-4746-3p	hsa-miR-4746-3p	hsa-miR-4746-3p	hsa-miR-4494	hsa-miR-4514
hsa-miR-4760-3p	hsa-miR-4760-3p	hsa-miR-4760-3p	hsa-miR-4494	hsa-miR-4517
hsa-miR-4764-3p	hsa-miR-4764-3p	hsa-miR-4764-3p	hsa-miR-4495	hsa-miR-452-3p
hsa-miR-4769-3p	hsa-miR-4769-3p	hsa-miR-4769-3p	hsa-miR-4500	hsa-miR-4524b-5p
hsa-miR-4771	hsa-miR-4771	hsa-miR-4771	hsa-miR-4509	hsa-miR-4527
hsa-miR-4774-3p	hsa-miR-4774-3p	hsa-miR-4774-3p	hsa-miR-4514	hsa-miR-4531
hsa-miR-4783-5p	hsa-miR-4783-5p	hsa-miR-4783-5p	hsa-miR-452-3p	hsa-miR-4534
hsa-miR-4793-5p	hsa-miR-4793-5p	hsa-miR-4793-5p	hsa-miR-4524b-3p	hsa-miR-4535
hsa-miR-4798-3p	hsa-miR-4798-3p	hsa-miR-4798-3p	hsa-miR-4524b-5p	hsa-miR-4537
hsa-miR-4799-3p	hsa-miR-4799-3p	hsa-miR-4799-3p	hsa-miR-4528	hsa-miR-4538
hsa-miR-5007-3p	hsa-miR-5007-3p	hsa-miR-5007-3p	hsa-miR-4530	hsa-miR-4539
hsa-miR-5009-3p	hsa-miR-5009-3p	hsa-miR-5009-3p	hsa-miR-4534	hsa-miR-4540
hsa-miR-5088-3p	hsa-miR-5088-3p	hsa-miR-5088-3p	hsa-miR-4535	hsa-miR-4633-3p
hsa-miR-5093	hsa-miR-5093	hsa-miR-5093	hsa-miR-4536-5p	hsa-miR-4633-5p
hsa-miR-5195-5p	hsa-miR-5195-5p	hsa-miR-5195-5p	hsa-miR-4538	hsa-miR-4643
hsa-miR-5197-3p	hsa-miR-5197-3p	hsa-miR-5197-3p	hsa-miR-4539	hsa-miR-4645-5p
hsa-miR-5197-5p	hsa-miR-5197-5p	hsa-miR-5197-5p	hsa-miR-4540	hsa-miR-4650-5p
hsa-miR-548bb-3p	hsa-miR-548bb-3p	hsa-miR-548bb-3p	hsa-miR-4633-5p	hsa-miR-4655-3p
hsa-miR-548bb-5p	hsa-miR-548bb-5p	hsa-miR-548bb-5p	hsa-miR-4634	hsa-miR-4659b-5p
hsa-miR-553	hsa-miR-553	hsa-miR-553	hsa-miR-4643	hsa-miR-4665-3p
hsa-miR-557	hsa-miR-557	hsa-miR-557	hsa-miR-4650-3p	hsa-miR-4666b
hsa-miR-5572	hsa-miR-5572	hsa-miR-5572	hsa-miR-4650-5p	hsa-miR-4668-3p
hsa-miR-558	hsa-miR-558	hsa-miR-558	hsa-miR-4659b-5p	hsa-miR-4675
hsa-miR-5581-5p	hsa-miR-5581-5p	hsa-miR-5581-5p	hsa-miR-466	hsa-miR-4678
hsa-miR-5582-5p	hsa-miR-5582-5p	hsa-miR-5582-5p	hsa-miR-4665-3p	hsa-miR-4685-5p
hsa-miR-5585-5p	hsa-miR-5585-5p	hsa-miR-5585-5p	hsa-miR-4666a-3p	hsa-miR-4691-5p
hsa-miR-563	hsa-miR-563	hsa-miR-563	hsa-miR-4666a-3p	hsa-miR-4693-3p
hsa-miR-566	hsa-miR-566	hsa-miR-566	hsa-miR-4666b	hsa-miR-4693-5p
hsa-miR-568	hsa-miR-568	hsa-miR-568	hsa-miR-4666b	hsa-miR-4694-3p
hsa-miR-5681a	hsa-miR-5681a	hsa-miR-5681a	hsa-miR-4678	hsa-miR-4695-5p
hsa-miR-5692a	hsa-miR-5692a	hsa-miR-5692a	hsa-miR-4681	hsa-miR-4697-5p
hsa-miR-5693	hsa-miR-5693	hsa-miR-5693	hsa-miR-4692	hsa-miR-4704-3p
hsa-miR-5702	hsa-miR-5702	hsa-miR-5702	hsa-miR-4693-3p	hsa-miR-4704-5p
hsa-miR-5707	hsa-miR-5707	hsa-miR-5707	hsa-miR-4693-5p	hsa-miR-4711-3p
hsa-miR-5739	hsa-miR-5739	hsa-miR-5739	hsa-miR-4696	hsa-miR-4712-5p
hsa-miR-591	hsa-miR-591	hsa-miR-591	hsa-miR-4703-3p	hsa-miR-4713-3p
hsa-miR-593-3p	hsa-miR-593-3p	hsa-miR-593-3p	hsa-miR-4704-3p	hsa-miR-4715-3p
hsa-miR-593-5p	hsa-miR-593-5p	hsa-miR-593-5p	hsa-miR-4704-5p	hsa-miR-4716-5p
hsa-miR-595	hsa-miR-595	hsa-miR-595	hsa-miR-4704-5p	hsa-miR-4717-5p
hsa-miR-596	hsa-miR-596	hsa-miR-596	hsa-miR-4711-3p	hsa-miR-4718
hsa-miR-601	hsa-miR-601	hsa-miR-601	hsa-miR-4711-5p	hsa-miR-4719
hsa-miR-6068	hsa-miR-6068	hsa-miR-6068	hsa-miR-4712-5p	hsa-miR-4720-3p
hsa-miR-6069	hsa-miR-6069	hsa-miR-6069	hsa-miR-4716-5p	hsa-miR-4724-3p
hsa-miR-6070	hsa-miR-6070	hsa-miR-6070	hsa-miR-4716-5p	hsa-miR-4738-5p
hsa-miR-6071	hsa-miR-6071	hsa-miR-6071	hsa-miR-4717-5p	hsa-miR-4740-5p
hsa-miR-6072	hsa-miR-6072	hsa-miR-6072	hsa-miR-4718	hsa-miR-4746-3p
hsa-miR-6073	hsa-miR-6073	hsa-miR-6073	hsa-miR-4720-3p	hsa-miR-4756-3p
hsa-miR-6074	hsa-miR-6074	hsa-miR-6074	hsa-miR-4720-3p	hsa-miR-4758-5p
hsa-miR-6075	hsa-miR-6075	hsa-miR-6075	hsa-miR-4722-3p	hsa-miR-4760-3p
hsa-miR-6076	hsa-miR-6076	hsa-miR-6076	hsa-miR-4724-3p	hsa-miR-4768-3p
hsa-miR-6077	hsa-miR-6077	hsa-miR-6077	hsa-miR-4726-3p	hsa-miR-4770
hsa-miR-6078	hsa-miR-6078	hsa-miR-6078	hsa-miR-4732-3p	hsa-miR-4771
hsa-miR-6079	hsa-miR-6079	hsa-miR-6079	hsa-miR-4738-5p	hsa-miR-4776-3p
hsa-miR-608	hsa-miR-608	hsa-miR-608	hsa-miR-4770	hsa-miR-4777-5p
hsa-miR-6080	hsa-miR-6080	hsa-miR-6080	hsa-miR-4771	hsa-miR-4778-5p
hsa-miR-6081	hsa-miR-6081	hsa-miR-6081	hsa-miR-4776-3p	hsa-miR-4779
hsa-miR-6082	hsa-miR-6082	hsa-miR-6082	hsa-miR-4777-5p	hsa-miR-4781-5p
hsa-miR-6083	hsa-miR-6083	hsa-miR-6083	hsa-miR-4780	hsa-miR-4782-3p
hsa-miR-6085	hsa-miR-6085	hsa-miR-6085	hsa-miR-4781-5p	hsa-miR-4783-5p
hsa-miR-6086	hsa-miR-6086	hsa-miR-6086	hsa-miR-4790-3p	hsa-miR-4790-3p
hsa-miR-6088	hsa-miR-6088	hsa-miR-6088	hsa-miR-4790-5p	hsa-miR-4790-5p
hsa-miR-6090	hsa-miR-6090	hsa-miR-6090	hsa-miR-4798-3p	hsa-miR-4792
hsa-miR-6124	hsa-miR-6124	hsa-miR-6124	hsa-miR-4800-5p	hsa-miR-4793-5p
hsa-miR-6126	hsa-miR-6126	hsa-miR-6126	hsa-miR-4801	hsa-miR-4798-3p
hsa-miR-6131	hsa-miR-6131	hsa-miR-6131	hsa-miR-5002-3p	hsa-miR-4799-3p
hsa-miR-614	hsa-miR-614	hsa-miR-614	hsa-miR-5011-3p	hsa-miR-4801
hsa-miR-6165	hsa-miR-6165	hsa-miR-6165	hsa-miR-5011-3p	hsa-miR-489-5p
hsa-miR-617	hsa-miR-617	hsa-miR-617	hsa-miR-5011-5p	hsa-miR-5007-3p
hsa-miR-619-3p	hsa-miR-619-3p	hsa-miR-619-3p	hsa-miR-5047	hsa-miR-5007-5p
hsa-miR-620	hsa-miR-620	hsa-miR-620	hsa-miR-516a-3p	hsa-miR-5047
hsa-miR-621	hsa-miR-621	hsa-miR-621	hsa-miR-5186	hsa-miR-5088-3p
hsa-miR-630	hsa-miR-630	hsa-miR-630	hsa-miR-518d-5p	hsa-miR-5089-3p
hsa-miR-631	hsa-miR-631	hsa-miR-631	hsa-miR-518f-5p	hsa-miR-5093
hsa-miR-633	hsa-miR-633	hsa-miR-633	hsa-miR-519e-3p	hsa-miR-513b-3p
hsa-miR-634	hsa-miR-634	hsa-miR-634	hsa-miR-519e-5p	hsa-miR-516b-3p
hsa-miR-635	hsa-miR-635	hsa-miR-635	hsa-miR-520h	hsa-miR-5186
hsa-miR-645	hsa-miR-645	hsa-miR-645	hsa-miR-523-5p	hsa-miR-518a-5p
hsa-miR-648	hsa-miR-648	hsa-miR-648	hsa-miR-526a	hsa-miR-5192
hsa-miR-6499-3p	hsa-miR-6499-3p	hsa-miR-6499-3p	hsa-miR-548bb-3p	hsa-miR-5195-3p
hsa-miR-6506-3p	hsa-miR-6506-3p	hsa-miR-6506-3p	hsa-miR-548bb-5p	hsa-miR-5195-5p
hsa-miR-661	hsa-miR-661	hsa-miR-661	hsa-miR-548i	hsa-miR-5196-3p
hsa-miR-662	hsa-miR-662	hsa-miR-662	hsa-miR-548m	hsa-miR-5196-5p
hsa-miR-6715b-5p	hsa-miR-6715b-5p	hsa-miR-6715b-5p	hsa-miR-553	hsa-miR-5197-3p
hsa-miR-6716-5p	hsa-miR-6716-5p	hsa-miR-6716-5p	hsa-miR-554	hsa-miR-519a-5p
hsa-miR-6728-3p	hsa-miR-6728-3p	hsa-miR-6728-3p	hsa-miR-555	hsa-miR-548-3p
hsa-miR-6749-5p	hsa-miR-6749-5p	hsa-miR-6749-5p	hsa-miR-557	hsa-miR-548aj-3p
hsa-miR-6752-5p	hsa-miR-6752-5p	hsa-miR-6752-5p	hsa-miR-5571-3p	hsa-miR-548as-5p
hsa-miR-6755-3p	hsa-miR-6755-3p	hsa-miR-6755-3p	hsa-miR-5571-5p	hsa-miR-548au-3p
hsa-miR-6759-3p	hsa-miR-6759-3p	hsa-miR-6759-3p	hsa-miR-5572	hsa-miR-548az-3p
hsa-miR-6763-3p	hsa-miR-6763-3p	hsa-miR-6763-3p	hsa-miR-5589-3p	hsa-miR-548bb-3p
hsa-miR-6767-3p	hsa-miR-6767-3p	hsa-miR-6767-3p	hsa-miR-5589-5p	hsa-miR-548bb-5p
hsa-miR-6768-5p	hsa-miR-6768-5p	hsa-miR-6768-5p	hsa-miR-5590-3p	hsa-miR-548g-3p
hsa-miR-6769a-5p	hsa-miR-6769a-5p	hsa-miR-6769a-5p	hsa-miR-5590-5p	hsa-miR-548m
hsa-miR-6773-3p	hsa-miR-6773-3p	hsa-miR-6773-3p	hsa-miR-5591-5p	hsa-miR-550b-2-5p
hsa-miR-6778-3p	hsa-miR-6778-3p	hsa-miR-6778-3p	hsa-miR-5591-5p	hsa-miR-553
hsa-miR-6805-3p	hsa-miR-6805-3p	hsa-miR-6805-3p	hsa-miR-562	hsa-miR-555
hsa-miR-6806-5p	hsa-miR-6806-5p	hsa-miR-6806-5p	hsa-miR-563	hsa-miR-557
hsa-miR-6808-5p	hsa-miR-6808-5p	hsa-miR-6808-5p	hsa-miR-564	hsa-miR-5571-3p
hsa-miR-6811-3p	hsa-miR-6811-3p	hsa-miR-6811-3p	hsa-miR-566	hsa-miR-5571-5p
hsa-miR-6816-5p	hsa-miR-6816-5p	hsa-miR-6816-5p	hsa-miR-567	hsa-miR-5572
hsa-miR-6817-5p	hsa-miR-6817-5p	hsa-miR-6817-5p	hsa-miR-568	hsa-miR-558
hsa-miR-6822-3p	hsa-miR-6822-3p	hsa-miR-6822-3p	hsa-miR-5681b	hsa-miR-5581-5p
hsa-miR-6828-3p	hsa-miR-6828-3p	hsa-miR-6828-3p	hsa-miR-5685	hsa-miR-5582-5p
hsa-miR-6830-3p	hsa-miR-6830-3p	hsa-miR-6830-3p	hsa-miR-5692b	hsa-miR-5583-3p
hsa-miR-6831-3p	hsa-miR-6831-3p	hsa-miR-6831-3p	hsa-miR-5704	hsa-miR-5589-3p
hsa-miR-6832-3p	hsa-miR-6832-3p	hsa-miR-6832-3p	hsa-miR-571	hsa-miR-5589-5p
hsa-miR-6835-3p	hsa-miR-6835-3p	hsa-miR-6835-3p	hsa-miR-5739	hsa-miR-5591-3p
hsa-miR-6841-3p	hsa-miR-6841-3p	hsa-miR-6841-3p	hsa-miR-575	hsa-miR-5591-5p
hsa-miR-6847-3p	hsa-miR-6847-3p	hsa-miR-6847-3p	hsa-miR-5787	hsa-miR-562
hsa-miR-6848-3p	hsa-miR-6848-3p	hsa-miR-6848-3p	hsa-miR-581	hsa-miR-563
hsa-miR-6852-3p	hsa-miR-6852-3p	hsa-miR-6852-3p	hsa-miR-586	hsa-miR-564
hsa-miR-6856-5p	hsa-miR-6856-5p	hsa-miR-6856-5p	hsa-miR-587	hsa-miR-566
hsa-miR-6857-5p	hsa-miR-6857-5p	hsa-miR-6857-5p	hsa-miR-591	hsa-miR-567
hsa-miR-6861-3p	hsa-miR-6861-3p	hsa-miR-6861-3p	hsa-miR-593-3p	hsa-miR-568
hsa-miR-6864-3p	hsa-miR-6864-3p	hsa-miR-6864-3p	hsa-miR-593-5p	hsa-miR-5681a
hsa-miR-6867-3p	hsa-miR-6867-3p	hsa-miR-6867-3p	hsa-miR-595	hsa-miR-5681b
hsa-miR-6869-3p	hsa-miR-6869-3p	hsa-miR-6869-3p	hsa-miR-596	hsa-miR-5687
hsa-miR-6878-3p	hsa-miR-6878-3p	hsa-miR-6878-3p	hsa-miR-597-5p	hsa-miR-569
hsa-miR-6893-5p	hsa-miR-6893-5p	hsa-miR-6893-5p	hsa-miR-601	hsa-miR-5692b
hsa-miR-7107-3p	hsa-miR-7107-3p	hsa-miR-7107-3p	hsa-miR-604	hsa-miR-5692c
hsa-miR-7107-5p	hsa-miR-7107-5p	hsa-miR-7107-5p	hsa-miR-606	hsa-miR-5704
hsa-miR-7109-5p	hsa-miR-7109-5p	hsa-miR-7109-5p	hsa-miR-6068	hsa-miR-5705
hsa-miR-711	hsa-miR-711	hsa-miR-711	hsa-miR-6069	hsa-miR-5707
hsa-miR-7112-5p	hsa-miR-7112-5p	hsa-miR-7112-5p	hsa-miR-6070	hsa-miR-5708
hsa-miR-7150	hsa-miR-7150	hsa-miR-7150	hsa-miR-6071	hsa-miR-571
hsa-miR-7153-3p	hsa-miR-7153-3p	hsa-miR-7153-3p	hsa-miR-6072	hsa-miR-572
hsa-miR-7160-5p	hsa-miR-7160-5p	hsa-miR-7160-5p	hsa-miR-6073	hsa-miR-5739
hsa-miR-718	hsa-miR-718	hsa-miR-718	hsa-miR-6074	hsa-miR-575
hsa-miR-7515	hsa-miR-7515	hsa-miR-7515	hsa-miR-6075	hsa-miR-587
hsa-miR-759	hsa-miR-759	hsa-miR-759	hsa-miR-6076	hsa-miR-591
hsa-miR-761	hsa-miR-761	hsa-miR-761	hsa-miR-6078	hsa-miR-593-3p
hsa-miR-762	hsa-miR-762	hsa-miR-762	hsa-miR-6079	hsa-miR-593-5p
hsa-miR-7856-5p	hsa-miR-7856-5p	hsa-miR-7856-5p	hsa-miR-608	hsa-miR-595
hsa-miR-7973	hsa-miR-7973	hsa-miR-7973	hsa-miR-6080	hsa-miR-596
hsa-miR-8054	hsa-miR-8054	hsa-miR-8054	hsa-miR-6081	hsa-miR-601
hsa-miR-8055	hsa-miR-8055	hsa-miR-8055	hsa-miR-6082	hsa-miR-603
hsa-miR-8056	hsa-miR-8056	hsa-miR-8056	hsa-miR-6083	hsa-miR-606
hsa-miR-8057	hsa-miR-8057	hsa-miR-8057	hsa-miR-6084	hsa-miR-6068
hsa-miR-8058	hsa-miR-8058	hsa-miR-8058	hsa-miR-6085	hsa-miR-6069
hsa-miR-8059	hsa-miR-8059	hsa-miR-8059	hsa-miR-6086	hsa-miR-6070
hsa-miR-8060	hsa-miR-8060	hsa-miR-8060	hsa-miR-6088	hsa-miR-6071
hsa-miR-8062	hsa-miR-8062	hsa-miR-8062	hsa-miR-6089	hsa-miR-6072
hsa-miR-8063	hsa-miR-8063	hsa-miR-8063	hsa-miR-6090	hsa-miR-6073
hsa-miR-8064	hsa-miR-8064	hsa-miR-8064	hsa-miR-611	hsa-miR-6074
hsa-miR-8065	hsa-miR-8065	hsa-miR-8065	hsa-miR-6124	hsa-miR-6075
hsa-miR-8066	hsa-miR-8066	hsa-miR-8066	hsa-miR-6126	hsa-miR-6076
hsa-miR-8067	hsa-miR-8067	hsa-miR-8067	hsa-miR-6127	hsa-miR-6077
hsa-miR-8068	hsa-miR-8068	hsa-miR-8068	hsa-miR-6129	hsa-miR-6078
hsa-miR-8069	hsa-miR-8069	hsa-miR-8069	hsa-miR-613	hsa-miR-6079
hsa-miR-8070	hsa-miR-8070	hsa-miR-8070	hsa-miR-6131	hsa-miR-608
hsa-miR-8071	hsa-miR-8071	hsa-miR-8071	hsa-miR-6133	hsa-miR-6080
hsa-miR-8073	hsa-miR-8073	hsa-miR-8073	hsa-miR-6134	hsa-miR-6081
hsa-miR-8074	hsa-miR-8074	hsa-miR-8074	hsa-miR-614	hsa-miR-6082
hsa-miR-8075	hsa-miR-8075	hsa-miR-8075	hsa-miR-6165	hsa-miR-6083
hsa-miR-8076	hsa-miR-8076	hsa-miR-8076	hsa-miR-617	hsa-miR-6084
hsa-miR-8077	hsa-miR-8077	hsa-miR-8077	hsa-miR-619-3p	hsa-miR-6085
hsa-miR-8078	hsa-miR-8078	hsa-miR-8078	hsa-miR-620	hsa-miR-6086
hsa-miR-8079	hsa-miR-8079	hsa-miR-8079	hsa-miR-621	hsa-miR-6088
hsa-miR-8080	hsa-miR-8080	hsa-miR-8080	hsa-miR-623	hsa-miR-609
hsa-miR-8081	hsa-miR-8081	hsa-miR-8081	hsa-miR-624-3p	hsa-miR-6090
hsa-miR-8082	hsa-miR-8082	hsa-miR-8082	hsa-miR-626	hsa-miR-611
hsa-miR-8083	hsa-miR-8083	hsa-miR-8083	hsa-miR-630	hsa-miR-6124
hsa-miR-8084	hsa-miR-8084	hsa-miR-8084	hsa-miR-631	hsa-miR-6126
hsa-miR-8086	hsa-miR-8086	hsa-miR-8086	hsa-miR-633	hsa-miR-6127
hsa-miR-8087	hsa-miR-8087	hsa-miR-8087	hsa-miR-634	hsa-miR-6128
hsa-miR-8088	hsa-miR-8088	hsa-miR-8088	hsa-miR-635	hsa-miR-6129
hsa-miR-8089	hsa-miR-8089	hsa-miR-8089	hsa-miR-637	hsa-miR-613
hsa-miR-920	hsa-miR-920	hsa-miR-920	hsa-miR-638	hsa-miR-6130
hsa-miR-924	hsa-miR-924	hsa-miR-924	hsa-miR-640	hsa-miR-6131
hsa-miR-938	hsa-miR-938	hsa-miR-938	hsa-miR-644a	hsa-miR-6133
hsa-miR-9500	hsa-miR-9500	hsa-miR-9500	hsa-miR-645	hsa-miR-6134
hsa-miR-1178-5p	hsa-miR-1178-5p		hsa-miR-646	hsa-miR-614
hsa-miR-1181	hsa-miR-1181		hsa-miR-647	hsa-miR-6165
hsa-miR-1182	hsa-miR-1182		hsa-miR-648	hsa-miR-617
hsa-miR-1183	hsa-miR-1183		hsa-miR-649	hsa-miR-619-3p
hsa-miR-1199-3p	hsa-miR-1199-3p		hsa-miR-650	hsa-miR-620
hsa-miR-1200	hsa-miR-1200		hsa-miR-6501-3p	hsa-miR-621
hsa-miR-1202	hsa-miR-1202		hsa-miR-6502-3p	hsa-miR-623
hsa-miR-1203	hsa-miR-1203		hsa-miR-6504-3p	hsa-miR-626
hsa-miR-1204	hsa-miR-1204		hsa-miR-6504-5p	hsa-miR-630
hsa-miR-1205	hsa-miR-1205		hsa-miR-6506-3p	hsa-miR-631
hsa-miR-1206	hsa-miR-1206		hsa-miR-6506-5p	hsa-miR-633
hsa-miR-1207-3p	hsa-miR-1207-3p		hsa-miR-6512-3p	hsa-miR-634
hsa-miR-1207-5p	hsa-miR-1207-5p		hsa-miR-661	hsa-miR-635
hsa-miR-1208	hsa-miR-1208		hsa-miR-662	hsa-miR-637
hsa-miR-122-3p	hsa-miR-122-3p		hsa-miR-668-5p	hsa-miR-638
hsa-miR-1225-3p	hsa-miR-1225-3p		hsa-miR-6716-5p	hsa-miR-640
hsa-miR-1227-5p	hsa-miR-1227-5p		hsa-miR-6719-3p	hsa-miR-642b-3p
hsa-miR-1231	hsa-miR-1231		hsa-miR-6727-3p	hsa-miR-642b-5p
hsa-miR-1238-5p	hsa-miR-1238-5p		hsa-miR-6736-3p	hsa-miR-644a
hsa-miR-1250-3p	hsa-miR-1250-3p		hsa-miR-6752-5p	hsa-miR-645
hsa-miR-1261	hsa-miR-1261		hsa-miR-6760-5p	hsa-miR-646
hsa-miR-1264	hsa-miR-1264		hsa-miR-6765-3p	hsa-miR-647
hsa-miR-1279	hsa-miR-1279		hsa-miR-6767-3p	hsa-miR-648
hsa-miR-1281	hsa-miR-1281		hsa-miR-6769a-3p	hsa-miR-649
hsa-miR-1282	hsa-miR-1282		hsa-miR-6771-3p	hsa-miR-6499-3p
hsa-miR-1297	hsa-miR-1297		hsa-miR-6778-3p	hsa-miR-650
hsa-miR-1301-5p	hsa-miR-1301-5p		hsa-miR-6785-3p	hsa-miR-6502-3p
hsa-miR-130a-5p	hsa-miR-130a-5p		hsa-miR-6793-3p	hsa-miR-6506-3p
hsa-miR-1321	hsa-miR-1321		hsa-miR-6804-3p	hsa-miR-6512-3p
hsa-miR-1322	hsa-miR-1322		hsa-miR-6806-5p	hsa-miR-658
hsa-miR-1324	hsa-miR-1324		hsa-miR-6808-5p	hsa-miR-661
hsa-miR-1469	hsa-miR-1469		hsa-miR-6809-3p	hsa-miR-668-5p
hsa-miR-1470	hsa-miR-1470		hsa-miR-6813-3p	hsa-miR-6715b-5p
hsa-miR-1471	hsa-miR-1471		hsa-miR-6828-3p	hsa-miR-6719-3p
hsa-miR-1539	hsa-miR-1539		hsa-miR-6829-3p	hsa-miR-6722-3p
hsa-miR-1587	hsa-miR-1587		hsa-miR-6829-3p	hsa-miR-6722-5p
hsa-miR-1912	hsa-miR-1912		hsa-miR-6831-3p	hsa-miR-6727-3p
hsa-miR-196a-3p	hsa-miR-196a-3p		hsa-miR-6835-3p	hsa-miR-6728-3p
hsa-miR-198	hsa-miR-198		hsa-miR-6838-3p	hsa-miR-6736-3p
hsa-miR-203a/203b-5p	hsa-miR-203a/203b-5p		hsa-miR-6841-3p	hsa-miR-6737-5p
hsa-miR-2052	hsa-miR-2052		hsa-miR-6848-3p	hsa-miR-6743-5p
hsa-miR-2053	hsa-miR-2053		hsa-miR-6853-5p	hsa-miR-6745
hsa-miR-2054	hsa-miR-2054		hsa-miR-6861-3p	hsa-miR-6752-3p
hsa-miR-208a-3p	hsa-miR-208a-3p		hsa-miR-6863	hsa-miR-6752-5p
hsa-miR-208a-5p	hsa-miR-208a-5p		hsa-miR-6864-3p	hsa-miR-6753-5p
hsa-miR-208b-3p	hsa-miR-208b-3p		hsa-miR-6867-3p	hsa-miR-6756-5p
hsa-miR-208b-5p	hsa-miR-208b-5p		hsa-miR-6868-5p	hsa-miR-6757-3p
hsa-miR-2117	hsa-miR-2117		hsa-miR-6871-3p	hsa-miR-6765-5p
hsa-miR-2392	hsa-miR-2392		hsa-miR-6876-3p	hsa-miR-6767-3p
hsa-miR-2861	hsa-miR-2861		hsa-miR-6883-5p	hsa-miR-6768-3p
hsa-miR-2909	hsa-miR-2909		hsa-miR-6891-3p	hsa-miR-6773-3p
hsa-miR-298	hsa-miR-298		hsa-miR-6892-3p	hsa-miR-6778-3p
hsa-miR-300	hsa-miR-300		hsa-miR-6893-3p	hsa-miR-6778-5p
hsa-miR-302b-5p	hsa-miR-302b-5p		hsa-miR-7106-3p	hsa-miR-6780a-3p
hsa-miR-302e	hsa-miR-302e		hsa-miR-7108-3p	hsa-miR-6784-5p
hsa-miR-302f	hsa-miR-302f		hsa-miR-7109-3p	hsa-miR-6785-3p
hsa-miR-3117-5p	hsa-miR-3117-5p		hsa-miR-711	hsa-miR-6790-5p
hsa-miR-3117-5p	hsa-miR-3117-5p		hsa-miR-7113-3p	hsa-miR-6806-5p
hsa-miR-3118	hsa-miR-3118		hsa-miR-7150	hsa-miR-6808-5p
hsa-miR-3123	hsa-miR-3123		hsa-miR-7152-3p	hsa-miR-6809-3p
hsa-miR-3130-3p	hsa-miR-3130-3p		hsa-miR-7153-3p	hsa-miR-6811-3p
hsa-miR-3135b	hsa-miR-3135b		hsa-miR-7153-5p	hsa-miR-6813-3p
hsa-miR-3142	hsa-miR-3142		hsa-miR-7154-3p	hsa-miR-6816-5p
hsa-miR-3151-3p	hsa-miR-3151-3p		hsa-miR-7154-5p	hsa-miR-6822-3p
hsa-miR-3152-3p	hsa-miR-3152-3p		hsa-miR-7155-5p	hsa-miR-6823-3p
hsa-miR-3156-3p	hsa-miR-3156-3p		hsa-miR-7156-3p	hsa-miR-6828-3p
hsa-miR-3159	hsa-miR-3159		hsa-miR-7157-3p	hsa-miR-6829-3p
hsa-miR-3161	hsa-miR-3161		hsa-miR-7158-5p	hsa-miR-6835-3p
hsa-miR-3169	hsa-miR-3169		hsa-miR-7159-3p	hsa-miR-6838-3p
hsa-miR-3185	hsa-miR-3185		hsa-miR-7159-5p	hsa-miR-6839-3p
hsa-miR-3201	hsa-miR-3201		hsa-miR-7160-5p	hsa-miR-6845-3p
hsa-miR-325	hsa-miR-325		hsa-miR-7161-3p	hsa-miR-6846-3p
hsa-miR-3606-3p	hsa-miR-3606-3p		hsa-miR-7161-5p	hsa-miR-6848-3p
hsa-miR-3606-5p	hsa-miR-3606-5p		hsa-miR-7162-3p	hsa-miR-6849-5p
hsa-miR-3612	hsa-miR-3612		hsa-miR-7162-5p	hsa-miR-6851-3p
hsa-miR-3618	hsa-miR-3618		hsa-miR-718	hsa-miR-6852-3p
hsa-miR-3621	hsa-miR-3621		hsa-miR-7515	hsa-miR-6853-5p
hsa-miR-3622b-3p	hsa-miR-3622b-3p		hsa-miR-759	hsa-miR-6854-3p
hsa-miR-3622b-5p	hsa-miR-3622b-5p		hsa-miR-761	hsa-miR-6857-5p
hsa-miR-3622b-5p	hsa-miR-3622b-5p		hsa-miR-762	hsa-miR-6860
hsa-miR-3649	hsa-miR-3649		hsa-miR-764	hsa-miR-6861-3p
hsa-miR-3655	hsa-miR-3655		hsa-miR-764	hsa-miR-6863
hsa-miR-3655	hsa-miR-3655		hsa-miR-7843-5p	hsa-miR-6867-3p
hsa-miR-3658	hsa-miR-3658		hsa-miR-7847-3p	hsa-miR-6868-5p
hsa-miR-3665	hsa-miR-3665		hsa-miR-7849-3p	hsa-miR-6869-3p
hsa-miR-3666	hsa-miR-3666		hsa-miR-7853-5p	hsa-miR-6870-5p
hsa-miR-3669	hsa-miR-3669		hsa-miR-7856-5p	hsa-miR-6872-3p
hsa-miR-3670	hsa-miR-3670		hsa-miR-7973	hsa-miR-6872-5p
hsa-miR-3671	hsa-miR-3671		hsa-miR-7978	hsa-miR-6878-3p
hsa-miR-3673	hsa-miR-3673		hsa-miR-802	hsa-miR-6883-5p
hsa-miR-367-5p	hsa-miR-367-5p		hsa-miR-8052	hsa-miR-6888-5p
hsa-miR-3683	hsa-miR-3683		hsa-miR-8053	hsa-miR-6890-3p
hsa-miR-3689b-3p	hsa-miR-3689b-3p		hsa-miR-8054	hsa-miR-6893-3p
hsa-miR-3689d	hsa-miR-3689d		hsa-miR-8055	hsa-miR-7106-3p
hsa-miR-3713	hsa-miR-3713		hsa-miR-8056	hsa-miR-7107-3p
hsa-miR-3714	hsa-miR-3714		hsa-miR-8057	hsa-miR-7107-5p
hsa-miR-378j	hsa-miR-378j		hsa-miR-8059	hsa-miR-711
hsa-miR-384	hsa-miR-384		hsa-miR-8060	hsa-miR-7112-3p
hsa-miR-3914	hsa-miR-3914		hsa-miR-8061	hsa-miR-7112-5p
hsa-miR-3915	hsa-miR-3915		hsa-miR-8061	hsa-miR-7150
hsa-miR-3920	hsa-miR-3920		hsa-miR-8062	hsa-miR-7153-3p
hsa-miR-3921	hsa-miR-3921		hsa-miR-8063	hsa-miR-7153-5p
hsa-miR-3939	hsa-miR-3939		hsa-miR-8064	hsa-miR-7154-3p
hsa-miR-3960	hsa-miR-3960		hsa-miR-8065	hsa-miR-7154-5p
hsa-miR-3972	hsa-miR-3972		hsa-miR-8066	hsa-miR-7157-5p
hsa-miR-3973	hsa-miR-3973		hsa-miR-8067	hsa-miR-7159-3p
hsa-miR-3974	hsa-miR-3974		hsa-miR-8068	hsa-miR-7159-5p
hsa-miR-3975	hsa-miR-3975		hsa-miR-8069	hsa-miR-7160-3p
hsa-miR-3976	hsa-miR-3976		hsa-miR-8070	hsa-miR-7160-5p
hsa-miR-3977	hsa-miR-3977		hsa-miR-8071	hsa-miR-7161-3p
hsa-miR-3978	hsa-miR-3978		hsa-miR-8073	hsa-miR-7161-5p
hsa-miR-4251	hsa-miR-4251		hsa-miR-8074	hsa-miR-7162-3p
hsa-miR-4252	hsa-miR-4252		hsa-miR-8075	hsa-miR-7162-5p
hsa-miR-4253	hsa-miR-4253		hsa-miR-8076	hsa-miR-718
hsa-miR-4254	hsa-miR-4254		hsa-miR-8077	hsa-miR-7515
hsa-miR-4255	hsa-miR-4255		hsa-miR-8079	hsa-miR-759
hsa-miR-4256	hsa-miR-4256		hsa-miR-8080	hsa-miR-761
hsa-miR-4257	hsa-miR-4257		hsa-miR-8081	hsa-miR-762
hsa-miR-4258	hsa-miR-4258		hsa-miR-8082	hsa-miR-7702
hsa-miR-4259	hsa-miR-4259		hsa-miR-8083	hsa-miR-8052
hsa-miR-4260	hsa-miR-4260		hsa-miR-8084	hsa-miR-8053
hsa-miR-4261	hsa-miR-4261		hsa-miR-8086	hsa-miR-8054
hsa-miR-4262	hsa-miR-4262		hsa-miR-8087	hsa-miR-8055
hsa-miR-4263	hsa-miR-4263		hsa-miR-8088	hsa-miR-8056
hsa-miR-4264	hsa-miR-4264		hsa-miR-8089	hsa-miR-8057
hsa-miR-4265	hsa-miR-4265		hsa-miR-888-3p	hsa-miR-8058
hsa-miR-4266	hsa-miR-4266		hsa-miR-890	hsa-miR-8059
hsa-miR-4267	hsa-miR-4267		hsa-miR-891a-3p	hsa-miR-8060
hsa-miR-4268	hsa-miR-4268		hsa-miR-892c-5p	hsa-miR-8062
hsa-miR-4269	hsa-miR-4269		hsa-miR-920	hsa-miR-8063
hsa-miR-4270	hsa-miR-4270		hsa-miR-921	hsa-miR-8064
hsa-miR-4271	hsa-miR-4271		hsa-miR-922	hsa-miR-8065
hsa-miR-4272	hsa-miR-4272		hsa-miR-924	hsa-miR-8066
hsa-miR-4273	hsa-miR-4273		hsa-miR-936	hsa-miR-8067
hsa-miR-4274	hsa-miR-4274		hsa-miR-938	hsa-miR-8068
hsa-miR-4275	hsa-miR-4275		hsa-miR-9500	hsa-miR-8069
hsa-miR-4276	hsa-miR-4276			hsa-miR-8070
hsa-miR-4277	hsa-miR-4277			hsa-miR-8071
hsa-miR-4278	hsa-miR-4278			hsa-miR-8073
hsa-miR-4279	hsa-miR-4279			hsa-miR-8074
hsa-miR-4280	hsa-miR-4280			hsa-miR-8075
hsa-miR-4281	hsa-miR-4281			hsa-miR-8076
hsa-miR-4282	hsa-miR-4282			hsa-miR-8077
hsa-miR-4283	hsa-miR-4283			hsa-miR-8078
hsa-miR-4285	hsa-miR-4285			hsa-miR-8079
hsa-miR-4287	hsa-miR-4287			hsa-miR-8080
hsa-miR-4288	hsa-miR-4288			hsa-miR-8081
hsa-miR-4289	hsa-miR-4289			hsa-miR-8082
hsa-miR-4290	hsa-miR-4290			hsa-miR-8083
hsa-miR-4291	hsa-miR-4291			hsa-miR-8084
hsa-miR-4293	hsa-miR-4293			hsa-miR-8085
hsa-miR-4294	hsa-miR-4294			hsa-miR-8086
hsa-miR-4295	hsa-miR-4295			hsa-miR-8087
hsa-miR-4296	hsa-miR-4296			hsa-miR-8088
hsa-miR-4297	hsa-miR-4297			hsa-miR-8089
hsa-miR-4298	hsa-miR-4298			hsa-miR-888-3p
hsa-miR-4299	hsa-miR-4299			hsa-miR-891a-3p
hsa-miR-4300	hsa-miR-4300			hsa-miR-892c-5p
hsa-miR-4301	hsa-miR-4301			hsa-miR-920
hsa-miR-4302	hsa-miR-4302			hsa-miR-922
hsa-miR-4303	hsa-miR-4303			hsa-miR-924
hsa-miR-4304	hsa-miR-4304			hsa-miR-938
hsa-miR-4305	hsa-miR-4305			hsa-miR-9500
hsa-miR-4307	hsa-miR-4307
hsa-miR-4308	hsa-miR-4308
hsa-miR-4309	hsa-miR-4309
hsa-miR-4310	hsa-miR-4310
hsa-miR-4311	hsa-miR-4311
hsa-miR-4312	hsa-miR-4312
hsa-miR-4313	hsa-miR-4313
hsa-miR-4314	hsa-miR-4314
hsa-miR-4315	hsa-miR-4315
hsa-miR-4316	hsa-miR-4316
hsa-miR-4317	hsa-miR-4317
hsa-miR-4318	hsa-miR-4318
hsa-miR-4319	hsa-miR-4319
hsa-miR-4320	hsa-miR-4320
hsa-miR-4321	hsa-miR-4321
hsa-miR-4322	hsa-miR-4322
hsa-miR-4323	hsa-miR-4323
hsa-miR-4324	hsa-miR-4324
hsa-miR-4325	hsa-miR-4325
hsa-miR-4327	hsa-miR-4327
hsa-miR-4328	hsa-miR-4328
hsa-miR-4329	hsa-miR-4329
hsa-miR-4330	hsa-miR-4330
hsa-miR-4419a	hsa-miR-4419a
hsa-miR-4432	hsa-miR-4432
hsa-miR-4436a	hsa-miR-4436a
hsa-miR-4438	hsa-miR-4438
hsa-miR-4441	hsa-miR-4441
hsa-miR-4447	hsa-miR-4447
hsa-miR-4452	hsa-miR-4452
hsa-miR-4456	hsa-miR-4456
hsa-miR-4464	hsa-miR-4464
hsa-miR-4468	hsa-miR-4468
hsa-miR-4472	hsa-miR-4472
hsa-miR-4474-5p	hsa-miR-4474-5p
hsa-miR-4478	hsa-miR-4478
hsa-miR-4486	hsa-miR-4486
hsa-miR-4490	hsa-miR-4490
hsa-miR-4494	hsa-miR-4494
hsa-miR-4494	hsa-miR-4494
hsa-miR-4495	hsa-miR-4495
hsa-miR-4500	hsa-miR-4500
hsa-miR-4509	hsa-miR-4509
hsa-miR-4514	hsa-miR-4514
hsa-miR-452-3p	hsa-miR-452-3p
hsa-miR-4524b-3p	hsa-miR-4524b-3p
hsa-miR-4524b-5p	hsa-miR-4524b-5p
hsa-miR-4528	hsa-miR-4528
hsa-miR-4530	hsa-miR-4530
hsa-miR-4534	hsa-miR-4534
hsa-miR-4535	hsa-miR-4535
hsa-miR-4536-5p	hsa-miR-4536-5p
hsa-miR-4538	hsa-miR-4538
hsa-miR-4539	hsa-miR-4539
hsa-miR-4540	hsa-miR-4540
hsa-miR-4633-5p	hsa-miR-4633-5p
hsa-miR-4634	hsa-miR-4634
hsa-miR-4643	hsa-miR-4643
hsa-miR-4650-3p	hsa-miR-4650-3p
hsa-miR-4650-5p	hsa-miR-4650-5p
hsa-miR-4659b-5p	hsa-miR-4659b-5p
hsa-miR-466	hsa-miR-466
hsa-miR-4665-3p	hsa-miR-4665-3p
hsa-miR-4666a-3p	hsa-miR-4666a-3p
hsa-miR-4666a-3p	hsa-miR-4666a-3p
hsa-miR-4666b	hsa-miR-4666b
hsa-miR-4666b	hsa-miR-4666b
hsa-miR-4678	hsa-miR-4678
hsa-miR-4681	hsa-miR-4681
hsa-miR-4692	hsa-miR-4692
hsa-miR-4693-3p	hsa-miR-4693-3p
hsa-miR-4693-5p	hsa-miR-4693-5p
hsa-miR-4696	hsa-miR-4696
hsa-miR-4703-3p	hsa-miR-4703-3p
hsa-miR-4704-3p	hsa-miR-4704-3p
hsa-miR-4704-5p	hsa-miR-4704-5p
hsa-miR-4704-5p	hsa-miR-4704-5p
hsa-miR-4711-3p	hsa-miR-4711-3p
hsa-miR-4711-5p	hsa-miR-4711-5p
hsa-miR-4712-5p	hsa-miR-4712-5p
hsa-miR-4716-5p	hsa-miR-4716-5p
hsa-miR-4716-5p	hsa-miR-4716-5p
hsa-miR-4717-5p	hsa-miR-4717-5p
hsa-miR-4718	hsa-miR-4718
hsa-miR-4720-3p	hsa-miR-4720-3p
hsa-miR-4720-3p	hsa-miR-4720-3p
hsa-miR-4722-3p	hsa-miR-4722-3p
hsa-miR-4724-3p	hsa-miR-4724-3p
hsa-miR-4726-3p	hsa-miR-4726-3p
hsa-miR-4732-3p	hsa-miR-4732-3p
hsa-miR-4738-5p	hsa-miR-4738-5p
hsa-miR-4770	hsa-miR-4770
hsa-miR-4771	hsa-miR-4771
hsa-miR-4776-3p	hsa-miR-4776-3p
hsa-miR-4777-5p	hsa-miR-4777-5p
hsa-miR-4780	hsa-miR-4780
hsa-miR-4781-5p	hsa-miR-4781-5p
hsa-miR-4790-3p	hsa-miR-4790-3p
hsa-miR-4790-5p	hsa-miR-4790-5p
hsa-miR-4798-3p	hsa-miR-4798-3p
hsa-miR-4800-5p	hsa-miR-4800-5p
hsa-miR-4801	hsa-miR-4801
hsa-miR-5002-3p	hsa-miR-5002-3p
hsa-miR-5011-3p	hsa-miR-5011-3p
hsa-miR-5011-3p	hsa-miR-5011-3p
hsa-miR-5011-5p	hsa-miR-5011-5p
hsa-miR-5047	hsa-miR-5047
hsa-miR-516a-3p	hsa-miR-516a-3p
hsa-miR-5186	hsa-miR-5186
hsa-miR-518d-5p	hsa-miR-518d-5p
hsa-miR-518f-5p	hsa-miR-518f-5p
hsa-miR-519e-3p	hsa-miR-519e-3p
hsa-miR-519e-5p	hsa-miR-519e-5p
hsa-miR-520h	hsa-miR-520h
hsa-miR-523-5p	hsa-miR-523-5p
hsa-miR-526a	hsa-miR-526a
hsa-miR-548bb-3p	hsa-miR-548bb-3p
hsa-miR-548bb-5p	hsa-miR-548bb-5p
hsa-miR-548i	hsa-miR-548i
hsa-miR-548m	hsa-miR-548m
hsa-miR-553	hsa-miR-553
hsa-miR-554	hsa-miR-554
hsa-miR-555	hsa-miR-555
hsa-miR-557	hsa-miR-557
hsa-miR-5571-3p	hsa-miR-5571-3p
hsa-miR-5571-5p	hsa-miR-5571-5p
hsa-miR-5572	hsa-miR-5572
hsa-miR-5589-3p	hsa-miR-5589-3p
hsa-miR-5589-5p	hsa-miR-5589-5p
hsa-miR-5590-3p	hsa-miR-5590-3p
hsa-miR-5590-5p	hsa-miR-5590-5p
hsa-miR-5591-5p	hsa-miR-5591-5p
hsa-miR-5591-5p	hsa-miR-5591-5p
hsa-miR-562	hsa-miR-562
hsa-miR-563	hsa-miR-563
hsa-miR-564	hsa-miR-564
hsa-miR-566	hsa-miR-566
hsa-miR-567	hsa-miR-567
hsa-miR-568	hsa-miR-568
hsa-miR-5681b	hsa-miR-5681b
hsa-miR-5685	hsa-miR-5685
hsa-miR-5692b	hsa-miR-5692b
hsa-miR-5704	hsa-miR-5704
hsa-miR-571	hsa-miR-571
hsa-miR-5739	hsa-miR-5739
hsa-miR-575	hsa-miR-575
hsa-miR-5787	hsa-miR-5787
hsa-miR-581	hsa-miR-581
hsa-miR-586	hsa-miR-586
hsa-miR-587	hsa-miR-587
hsa-miR-591	hsa-miR-591
hsa-miR-593-3p	hsa-miR-593-3p
hsa-miR-593-5p	hsa-miR-593-5p
hsa-miR-595	hsa-miR-595
hsa-miR-596	hsa-miR-596
hsa-miR-597-5p	hsa-miR-597-5p
hsa-miR-601	hsa-miR-601
hsa-miR-604	hsa-miR-604
hsa-miR-606	hsa-miR-606
hsa-miR-6068	hsa-miR-6068
hsa-miR-6069	hsa-miR-6069
hsa-miR-6070	hsa-miR-6070
hsa-miR-6071	hsa-miR-6071
hsa-miR-6072	hsa-miR-6072
hsa-miR-6073	hsa-miR-6073
hsa-miR-6074	hsa-miR-6074
hsa-miR-6075	hsa-miR-6075
hsa-miR-6076	hsa-miR-6076
hsa-miR-6078	hsa-miR-6078
hsa-miR-6079	hsa-miR-6079
hsa-miR-608	hsa-miR-608
hsa-miR-6080	hsa-miR-6080
hsa-miR-6081	hsa-miR-6081
hsa-miR-6082	hsa-miR-6082
hsa-miR-6083	hsa-miR-6083
hsa-miR-6084	hsa-miR-6084
hsa-miR-6085	hsa-miR-6085
hsa-miR-6086	hsa-miR-6086
hsa-miR-6088	hsa-miR-6088
hsa-miR-6089	hsa-miR-6089
hsa-miR-6090	hsa-miR-6090
hsa-miR-611	hsa-miR-611
hsa-miR-6124	hsa-miR-6124
hsa-miR-6126	hsa-miR-6126
hsa-miR-6127	hsa-miR-6127
hsa-miR-6129	hsa-miR-6129
hsa-miR-613	hsa-miR-613
hsa-miR-6131	hsa-miR-6131
hsa-miR-6133	hsa-miR-6133
hsa-miR-6134	hsa-miR-6134
hsa-miR-614	hsa-miR-614
hsa-miR-6165	hsa-miR-6165
hsa-miR-617	hsa-miR-617
hsa-miR-619-3p	hsa-miR-619-3p
hsa-miR-620	hsa-miR-620
hsa-miR-621	hsa-miR-621
hsa-miR-623	hsa-miR-623
hsa-miR-624-3p	hsa-miR-624-3p
hsa-miR-626	hsa-miR-626
hsa-miR-630	hsa-miR-630
hsa-miR-631	hsa-miR-631
hsa-miR-633	hsa-miR-633
hsa-miR-634	hsa-miR-634
hsa-miR-635	hsa-miR-635
hsa-miR-637	hsa-miR-637
hsa-miR-638	hsa-miR-638
hsa-miR-640	hsa-miR-640
hsa-miR-644a	hsa-miR-644a
hsa-miR-645	hsa-miR-645
hsa-miR-646	hsa-miR-646
hsa-miR-647	hsa-miR-647
hsa-miR-648	hsa-miR-648
hsa-miR-649	hsa-miR-649
hsa-miR-650	hsa-miR-650
hsa-miR-6501-3p	hsa-miR-6501-3p
hsa-miR-6502-3p	hsa-miR-6502-3p
hsa-miR-6504-3p	hsa-miR-6504-3p
hsa-miR-6504-5p	hsa-miR-6504-5p
hsa-miR-6506-3p	hsa-miR-6506-3p
hsa-miR-6506-5p	hsa-miR-6506-5p
hsa-miR-6512-3p	hsa-miR-6512-3p
hsa-miR-661	hsa-miR-661
hsa-miR-662	hsa-miR-662
hsa-miR-668-5p	hsa-miR-668-5p
hsa-miR-6716-5p	hsa-miR-6716-5p
hsa-miR-6719-3p	hsa-miR-6719-3p
hsa-miR-6727-3p	hsa-miR-6727-3p
hsa-miR-6736-3p	hsa-miR-6736-3p
hsa-miR-6752-5p	hsa-miR-6752-5p
hsa-miR-6760-5p	hsa-miR-6760-5p
hsa-miR-6765-3p	hsa-miR-6765-3p
hsa-miR-6767-3p	hsa-miR-6767-3p
hsa-miR-6769a-3p	hsa-miR-6769a-3p
hsa-miR-6771-3p	hsa-miR-6771-3p
hsa-miR-6778-3p	hsa-miR-6778-3p
hsa-miR-6785-3p	hsa-miR-6785-3p
hsa-miR-6793-3p	hsa-miR-6793-3p
hsa-miR-6804-3p	hsa-miR-6804-3p
hsa-miR-6806-5p	hsa-miR-6806-5p
hsa-miR-6808-5p	hsa-miR-6808-5p
hsa-miR-6809-3p	hsa-miR-6809-3p
hsa-miR-6813-3p	hsa-miR-6813-3p
hsa-miR-6828-3p	hsa-miR-6828-3p
hsa-miR-6829-3p	hsa-miR-6829-3p
hsa-miR-6829-3p	hsa-miR-6829-3p
hsa-miR-6831-3p	hsa-miR-6831-3p
hsa-miR-6835-3p	hsa-miR-6835-3p
hsa-miR-6838-3p	hsa-miR-6838-3p
hsa-miR-6841-3p	hsa-miR-6841-3p
hsa-miR-6848-3p	hsa-miR-6848-3p
hsa-miR-6853-5p	hsa-miR-6853-5p
hsa-miR-6861-3p	hsa-miR-6861-3p
hsa-miR-6863	hsa-miR-6863
hsa-miR-6864-3p	hsa-miR-6864-3p
hsa-miR-6867-3p	hsa-miR-6867-3p
hsa-miR-6868-5p	hsa-miR-6868-5p
hsa-miR-6871-3p	hsa-miR-6871-3p
hsa-miR-6876-3p	hsa-miR-6876-3p
hsa-miR-6883-5p	hsa-miR-6883-5p
hsa-miR-6891-3p	hsa-miR-6891-3p
hsa-miR-6892-3p	hsa-miR-6892-3p
hsa-miR-6893-3p	hsa-miR-6893-3p
hsa-miR-7106-3p	hsa-miR-7106-3p
hsa-miR-7108-3p	hsa-miR-7108-3p
hsa-miR-7109-3p	hsa-miR-7109-3p
hsa-miR-711	hsa-miR-711
hsa-miR-7113-3p	hsa-miR-7113-3p
hsa-miR-7150	hsa-miR-7150
hsa-miR-7152-3p	hsa-miR-7152-3p
hsa-miR-7153-3p	hsa-miR-7153-3p
hsa-miR-7153-5p	hsa-miR-7153-5p
hsa-miR-7154-3p	hsa-miR-7154-3p
hsa-miR-7154-5p	hsa-miR-7154-5p
hsa-miR-7155-5p	hsa-miR-7155-5p
hsa-miR-7156-3p	hsa-miR-7156-3p
hsa-miR-7157-3p	hsa-miR-7157-3p
hsa-miR-7158-5p	hsa-miR-7158-5p
hsa-miR-7159-3p	hsa-miR-7159-3p
hsa-miR-7159-5p	hsa-miR-7159-5p
hsa-miR-7160-5p	hsa-miR-7160-5p
hsa-miR-7161-3p	hsa-miR-7161-3p
hsa-miR-7161-5p	hsa-miR-7161-5p
hsa-miR-7162-3p	hsa-miR-7162-3p
hsa-miR-7162-5p	hsa-miR-7162-5p
hsa-miR-718	hsa-miR-718
hsa-miR-7515	hsa-miR-7515
hsa-miR-759	hsa-miR-759
hsa-miR-761	hsa-miR-761
hsa-miR-762	hsa-miR-762
hsa-miR-764	hsa-miR-764
hsa-miR-764	hsa-miR-764
hsa-miR-7843-5p	hsa-miR-7843-5p
hsa-miR-7847-3p	hsa-miR-7847-3p
hsa-miR-7849-3p	hsa-miR-7849-3p
hsa-miR-7853-5p	hsa-miR-7853-5p
hsa-miR-7856-5p	hsa-miR-7856-5p
hsa-miR-7973	hsa-miR-7973
hsa-miR-7978	hsa-miR-7978
hsa-miR-802	hsa-miR-802
hsa-miR-8052	hsa-miR-8052
hsa-miR-8053	hsa-miR-8053
hsa-miR-8054	hsa-miR-8054
hsa-miR-8055	hsa-miR-8055
hsa-miR-8056	hsa-miR-8056
hsa-miR-8057	hsa-miR-8057
hsa-miR-8059	hsa-miR-8059
hsa-miR-8060	hsa-miR-8060
hsa-miR-8061	hsa-miR-8061
hsa-miR-8061	hsa-miR-8061
hsa-miR-8062	hsa-miR-8062
hsa-miR-8063	hsa-miR-8063
hsa-miR-8064	hsa-miR-8064
hsa-miR-8065	hsa-miR-8065
hsa-miR-8066	hsa-miR-8066
hsa-miR-8067	hsa-miR-8067
hsa-miR-8068	hsa-miR-8068
hsa-miR-8069	hsa-miR-8069
hsa-miR-8070	hsa-miR-8070
hsa-miR-8071	hsa-miR-8071
hsa-miR-8073	hsa-miR-8073
hsa-miR-8074	hsa-miR-8074
hsa-miR-8075	hsa-miR-8075
hsa-miR-8076	hsa-miR-8076
hsa-miR-8077	hsa-miR-8077
hsa-miR-8079	hsa-miR-8079
hsa-miR-8080	hsa-miR-8080
hsa-miR-8081	hsa-miR-8081
hsa-miR-8082	hsa-miR-8082
hsa-miR-8083	hsa-miR-8083
hsa-miR-8084	hsa-miR-8084
hsa-miR-8086	hsa-miR-8086
hsa-miR-8087	hsa-miR-8087
hsa-miR-8088	hsa-miR-8088
hsa-miR-8089	hsa-miR-8089
hsa-miR-888-3p	hsa-miR-888-3p
hsa-miR-890	hsa-miR-890
hsa-miR-891a-3p	hsa-miR-891a-3p
hsa-miR-892c-5p	hsa-miR-892c-5p
hsa-miR-920	hsa-miR-920
hsa-miR-921	hsa-miR-921
hsa-miR-922	hsa-miR-922
hsa-miR-924	hsa-miR-924
hsa-miR-936	hsa-miR-936
hsa-miR-938	hsa-miR-938
hsa-miR-9500	hsa-miR-9500
hsa-miR-1178-5p	hsa-miR-1178-5p
hsa-miR-1181	hsa-miR-1181
hsa-miR-1182	hsa-miR-1182
hsa-miR-1183	hsa-miR-1183
hsa-miR-1184	hsa-miR-1184
hsa-miR-1199-3p	hsa-miR-1199-3p
hsa-miR-1199-5p	hsa-miR-1199-5p
hsa-miR-1202	hsa-miR-1202
hsa-miR-1203	hsa-miR-1203
hsa-miR-1204	hsa-miR-1204
hsa-miR-1205	hsa-miR-1205
hsa-miR-1206	hsa-miR-1206
hsa-miR-1207-3p	hsa-miR-1207-3p
hsa-miR-1207-5p	hsa-miR-1207-5p
hsa-miR-1227-5p	hsa-miR-1227-5p
hsa-miR-1231	hsa-miR-1231
hsa-miR-1236-5p	hsa-miR-1236-5p
hsa-miR-1238-5p	hsa-miR-1238-5p
hsa-miR-1250-3p	hsa-miR-1250-3p
hsa-miR-1261	hsa-miR-1261
hsa-miR-1266-3p	hsa-miR-1266-3p
hsa-miR-1273a	hsa-miR-1273a
hsa-miR-1279	hsa-miR-1279
hsa-miR-1281	hsa-miR-1281
hsa-miR-1282	hsa-miR-1282
hsa-miR-1295b-3p	hsa-miR-1295b-3p
hsa-miR-1301-5p	hsa-miR-1301-5p
hsa-miR-1321	hsa-miR-1321
hsa-miR-1469	hsa-miR-1469
hsa-miR-1470	hsa-miR-1470
hsa-miR-1471	hsa-miR-1471
hsa-miR-147a	hsa-miR-147a
hsa-miR-1539	hsa-miR-1539
hsa-miR-1587	hsa-miR-1587
hsa-miR-1825	hsa-miR-1825
hsa-miR-1827	hsa-miR-1827
hsa-miR-198	hsa-miR-198
hsa-miR-203a/203b-5p	hsa-miR-203a/203b-5p
hsa-miR-203b-3p	hsa-miR-203b-3p
hsa-miR-2052	hsa-miR-2052
hsa-miR-2053	hsa-miR-2053
hsa-miR-2054	hsa-miR-2054
hsa-miR-2861	hsa-miR-2861
hsa-miR-300	hsa-miR-300
hsa-miR-3118	hsa-miR-3118
hsa-miR-3119	hsa-miR-3119
hsa-miR-3135b	hsa-miR-3135b
hsa-miR-3136-3p	hsa-miR-3136-3p
hsa-miR-3140-5p	hsa-miR-3140-5p
hsa-miR-3147	hsa-miR-3147
hsa-miR-3151-3p	hsa-miR-3151-3p
hsa-miR-3156-3p	hsa-miR-3156-3p
hsa-miR-3168	hsa-miR-3168
hsa-miR-3169	hsa-miR-3169
hsa-miR-3185	hsa-miR-3185
hsa-miR-3201	hsa-miR-3201
hsa-miR-325	hsa-miR-325
hsa-miR-3606-3p	hsa-miR-3606-3p
hsa-miR-3606-5p	hsa-miR-3606-5p
hsa-miR-3618	hsa-miR-3618
hsa-miR-3621	hsa-miR-3621
hsa-miR-3622b-5p	hsa-miR-3622b-5p
hsa-miR-3649	hsa-miR-3649
hsa-miR-3650	hsa-miR-3650
hsa-miR-3655	hsa-miR-3655
hsa-miR-3658	hsa-miR-3658
hsa-miR-3665	hsa-miR-3665
hsa-miR-3666	hsa-miR-3666
hsa-miR-3669	hsa-miR-3669
hsa-miR-3670	hsa-miR-3670
hsa-miR-3671	hsa-miR-3671
hsa-miR-3672	hsa-miR-3672
hsa-miR-3673	hsa-miR-3673
hsa-miR-3674	hsa-miR-3674
hsa-miR-3681-3p	hsa-miR-3681-3p
hsa-miR-3682-5p	hsa-miR-3682-5p
hsa-miR-3683	hsa-miR-3683
hsa-miR-3689a-3p	hsa-miR-3689a-3p
hsa-miR-3689a-5p	hsa-miR-3689a-5p
hsa-miR-3689b-3p	hsa-miR-3689b-3p
hsa-miR-3689b-5p	hsa-miR-3689b-5p
hsa-miR-3689c	hsa-miR-3689c
hsa-miR-3689d	hsa-miR-3689d
hsa-miR-3689e	hsa-miR-3689e
hsa-miR-3689f	hsa-miR-3689f
hsa-miR-3713	hsa-miR-3713
hsa-miR-3714	hsa-miR-3714
hsa-miR-378h	hsa-miR-378h
hsa-miR-378j	hsa-miR-378j
hsa-miR-3912-5p	hsa-miR-3912-5p
hsa-miR-3915	hsa-miR-3915
hsa-miR-3922-3p	hsa-miR-3922-3p
hsa-miR-3926	hsa-miR-3926
hsa-miR-3972	hsa-miR-3972
hsa-miR-3973	hsa-miR-3973
hsa-miR-3974	hsa-miR-3974
hsa-miR-3975	hsa-miR-3975
hsa-miR-3976	hsa-miR-3976
hsa-miR-3977	hsa-miR-3977
hsa-miR-3978	hsa-miR-3978
hsa-miR-422a	hsa-miR-422a
hsa-miR-4251	hsa-miR-4251
hsa-miR-4252	hsa-miR-4252
hsa-miR-4253	hsa-miR-4253
hsa-miR-4255	hsa-miR-4255
hsa-miR-4256	hsa-miR-4256
hsa-miR-4257	hsa-miR-4257
hsa-miR-4258	hsa-miR-4258
hsa-miR-4259	hsa-miR-4259
hsa-miR-4260	hsa-miR-4260
hsa-miR-4261	hsa-miR-4261
hsa-miR-4262	hsa-miR-4262
hsa-miR-4263	hsa-miR-4263
hsa-miR-4264	hsa-miR-4264
hsa-miR-4265	hsa-miR-4265
hsa-miR-4266	hsa-miR-4266
hsa-miR-4267	hsa-miR-4267
hsa-miR-4268	hsa-miR-4268
hsa-miR-4269	hsa-miR-4269
hsa-miR-4270	hsa-miR-4270
hsa-miR-4271	hsa-miR-4271
hsa-miR-4272	hsa-miR-4272
hsa-miR-4273	hsa-miR-4273
hsa-miR-4274	hsa-miR-4274
hsa-miR-4275	hsa-miR-4275
hsa-miR-4276	hsa-miR-4276
hsa-miR-4277	hsa-miR-4277
hsa-miR-4278	hsa-miR-4278
hsa-miR-4279	hsa-miR-4279
hsa-miR-4280	hsa-miR-4280
hsa-miR-4282	hsa-miR-4282
hsa-miR-4283	hsa-miR-4283
hsa-miR-4285	hsa-miR-4285
hsa-miR-4287	hsa-miR-4287
hsa-miR-4288	hsa-miR-4288
hsa-miR-4289	hsa-miR-4289
hsa-miR-4290	hsa-miR-4290
hsa-miR-4291	hsa-miR-4291
hsa-miR-4292	hsa-miR-4292
hsa-miR-4293	hsa-miR-4293
hsa-miR-4294	hsa-miR-4294
hsa-miR-4295	hsa-miR-4295
hsa-miR-4296	hsa-miR-4296
hsa-miR-4297	hsa-miR-4297
hsa-miR-4298	hsa-miR-4298
hsa-miR-4299	hsa-miR-4299
hsa-miR-4300	hsa-miR-4300
hsa-miR-4301	hsa-miR-4301
hsa-miR-4302	hsa-miR-4302
hsa-miR-4303	hsa-miR-4303
hsa-miR-4304	hsa-miR-4304
hsa-miR-4305	hsa-miR-4305
hsa-miR-4307	hsa-miR-4307
hsa-miR-4308	hsa-miR-4308
hsa-miR-4309	hsa-miR-4309
hsa-miR-4310	hsa-miR-4310
hsa-miR-4311	hsa-miR-4311
hsa-miR-4313	hsa-miR-4313
hsa-miR-4314	hsa-miR-4314
hsa-miR-4316	hsa-miR-4316
hsa-miR-4317	hsa-miR-4317
hsa-miR-4318	hsa-miR-4318
hsa-miR-4319	hsa-miR-4319
hsa-miR-4320	hsa-miR-4320
hsa-miR-4321	hsa-miR-4321
hsa-miR-4322	hsa-miR-4322
hsa-miR-4323	hsa-miR-4323
hsa-miR-4324	hsa-miR-4324
hsa-miR-4325	hsa-miR-4325
hsa-miR-4327	hsa-miR-4327
hsa-miR-4328	hsa-miR-4328
hsa-miR-4329	hsa-miR-4329
hsa-miR-4428	hsa-miR-4428
hsa-miR-4432	hsa-miR-4432
hsa-miR-4436a	hsa-miR-4436a
hsa-miR-4438	hsa-miR-4438
hsa-miR-4441	hsa-miR-4441
hsa-miR-4445-3p	hsa-miR-4445-3p
hsa-miR-4445-5p	hsa-miR-4445-5p
hsa-miR-4447	hsa-miR-4447
hsa-miR-4452	hsa-miR-4452
hsa-miR-4456	hsa-miR-4456
hsa-miR-4460	hsa-miR-4460
hsa-miR-4462	hsa-miR-4462
hsa-miR-4465	hsa-miR-4465
hsa-miR-4468	hsa-miR-4468
hsa-miR-4471	hsa-miR-4471
hsa-miR-4472	hsa-miR-4472
hsa-miR-4474-5p	hsa-miR-4474-5p
hsa-miR-4475	hsa-miR-4475
hsa-miR-4480	hsa-miR-4480
hsa-miR-4481	hsa-miR-4481
hsa-miR-4483	hsa-miR-4483
hsa-miR-4491	hsa-miR-4491
hsa-miR-4494	hsa-miR-4494
hsa-miR-4495	hsa-miR-4495
hsa-miR-4496	hsa-miR-4496
hsa-miR-4499	hsa-miR-4499
hsa-miR-4500	hsa-miR-4500
hsa-miR-4507	hsa-miR-4507
hsa-miR-4509	hsa-miR-4509
hsa-miR-4514	hsa-miR-4514
hsa-miR-4517	hsa-miR-4517
hsa-miR-452-3p	hsa-miR-452-3p
hsa-miR-4524b-5p	hsa-miR-4524b-5p
hsa-miR-4527	hsa-miR-4527
hsa-miR-4531	hsa-miR-4531
hsa-miR-4534	hsa-miR-4534
hsa-miR-4535	hsa-miR-4535
hsa-miR-4537	hsa-miR-4537
hsa-miR-4538	hsa-miR-4538
hsa-miR-4539	hsa-miR-4539
hsa-miR-4540	hsa-miR-4540
hsa-miR-4633-3p	hsa-miR-4633-3p
hsa-miR-4633-5p	hsa-miR-4633-5p
hsa-miR-4643	hsa-miR-4643
hsa-miR-4645-5p	hsa-miR-4645-5p
hsa-miR-4650-5p	hsa-miR-4650-5p
hsa-miR-4655-3p	hsa-miR-4655-3p
hsa-miR-4659b-5p	hsa-miR-4659b-5p
hsa-miR-4665-3p	hsa-miR-4665-3p
hsa-miR-4666b	hsa-miR-4666b
hsa-miR-4668-3p	hsa-miR-4668-3p
hsa-miR-4675	hsa-miR-4675
hsa-miR-4678	hsa-miR-4678
hsa-miR-4685-5p	hsa-miR-4685-5p
hsa-miR-4691-5p	hsa-miR-4691-5p
hsa-miR-4693-3p	hsa-miR-4693-3p
hsa-miR-4693-5p	hsa-miR-4693-5p
hsa-miR-4694-3p	hsa-miR-4694-3p
hsa-miR-4695-5p	hsa-miR-4695-5p
hsa-miR-4697-5p	hsa-miR-4697-5p
hsa-miR-4704-3p	hsa-miR-4704-3p
hsa-miR-4704-5p	hsa-miR-4704-5p
hsa-miR-4711-3p	hsa-miR-4711-3p
hsa-miR-4712-5p	hsa-miR-4712-5p
hsa-miR-4713-3p	hsa-miR-4713-3p
hsa-miR-4715-3p	hsa-miR-4715-3p
hsa-miR-4716-5p	hsa-miR-4716-5p
hsa-miR-4717-5p	hsa-miR-4717-5p
hsa-miR-4718	hsa-miR-4718
hsa-miR-4719	hsa-miR-4719
hsa-miR-4720-3p	hsa-miR-4720-3p
hsa-miR-4724-3p	hsa-miR-4724-3p
hsa-miR-4738-5p	hsa-miR-4738-5p
hsa-miR-4740-5p	hsa-miR-4740-5p
hsa-miR-4746-3p	hsa-miR-4746-3p
hsa-miR-4756-3p	hsa-miR-4756-3p
hsa-miR-4758-5p	hsa-miR-4758-5p
hsa-miR-4760-3p	hsa-miR-4760-3p
hsa-miR-4768-3p	hsa-miR-4768-3p
hsa-miR-4770	hsa-miR-4770
hsa-miR-4771	hsa-miR-4771
hsa-miR-4776-3p	hsa-miR-4776-3p
hsa-miR-4777-5p	hsa-miR-4777-5p
hsa-miR-4778-5p	hsa-miR-4778-5p
hsa-miR-4779	hsa-miR-4779
hsa-miR-4781-5p	hsa-miR-4781-5p
hsa-miR-4782-3p	hsa-miR-4782-3p
hsa-miR-4783-5p	hsa-miR-4783-5p
hsa-miR-4790-3p	hsa-miR-4790-3p
hsa-miR-4790-5p	hsa-miR-4790-5p
hsa-miR-4792	hsa-miR-4792
hsa-miR-4793-5p	hsa-miR-4793-5p
hsa-miR-4798-3p	hsa-miR-4798-3p
hsa-miR-4799-3p	hsa-miR-4799-3p
hsa-miR-4801	hsa-miR-4801
hsa-miR-489-5p	hsa-miR-489-5p
hsa-miR-5007-3p	hsa-miR-5007-3p
hsa-miR-5007-5p	hsa-miR-5007-5p
hsa-miR-5047	hsa-miR-5047
hsa-miR-5088-3p	hsa-miR-5088-3p
hsa-miR-5089-3p	hsa-miR-5089-3p
hsa-miR-5093	hsa-miR-5093
hsa-miR-513b-3p	hsa-miR-513b-3p
hsa-miR-516b-3p	hsa-miR-516b-3p
hsa-miR-5186	hsa-miR-5186
hsa-miR-518a-5p	hsa-miR-518a-5p
hsa-miR-5192	hsa-miR-5192
hsa-miR-5195-3p	hsa-miR-5195-3p
hsa-miR-5195-5p	hsa-miR-5195-5p
hsa-miR-5196-3p	hsa-miR-5196-3p
hsa-miR-5196-5p	hsa-miR-5196-5p
hsa-miR-5197-3p	hsa-miR-5197-3p
hsa-miR-519a-5p	hsa-miR-519a-5p
hsa-miR-548-3p	hsa-miR-548-3p
hsa-miR-548aj-3p	hsa-miR-548aj-3p
hsa-miR-548as-5p	hsa-miR-548as-5p
hsa-miR-548au-3p	hsa-miR-548au-3p
hsa-miR-548az-3p	hsa-miR-548az-3p
hsa-miR-548bb-3p	hsa-miR-548bb-3p
hsa-miR-548bb-5p	hsa-miR-548bb-5p
hsa-miR-548g-3p	hsa-miR-548g-3p
hsa-miR-548m	hsa-miR-548m
hsa-miR-550b-2-5p	hsa-miR-550b-2-5p
hsa-miR-553	hsa-miR-553
hsa-miR-555	hsa-miR-555
hsa-miR-557	hsa-miR-557
hsa-miR-5571-3p	hsa-miR-5571-3p
hsa-miR-5571-5p	hsa-miR-5571-5p
hsa-miR-5572	hsa-miR-5572
hsa-miR-558	hsa-miR-558
hsa-miR-5581-5p	hsa-miR-5581-5p
hsa-miR-5582-5p	hsa-miR-5582-5p
hsa-miR-5583-3p	hsa-miR-5583-3p
hsa-miR-5589-3p	hsa-miR-5589-3p
hsa-miR-5589-5p	hsa-miR-5589-5p
hsa-miR-5591-3p	hsa-miR-5591-3p
hsa-miR-5591-5p	hsa-miR-5591-5p
hsa-miR-562	hsa-miR-562
hsa-miR-563	hsa-miR-563
hsa-miR-564	hsa-miR-564
hsa-miR-566	hsa-miR-566
hsa-miR-567	hsa-miR-567
hsa-miR-568	hsa-miR-568
hsa-miR-5681a	hsa-miR-5681a
hsa-miR-5681b	hsa-miR-5681b
hsa-miR-5687	hsa-miR-5687
hsa-miR-569	hsa-miR-569
hsa-miR-5692b	hsa-miR-5692b
hsa-miR-5692c	hsa-miR-5692c
hsa-miR-5704	hsa-miR-5704
hsa-miR-5705	hsa-miR-5705
hsa-miR-5707	hsa-miR-5707
hsa-miR-5708	hsa-miR-5708
hsa-miR-571	hsa-miR-571
hsa-miR-572	hsa-miR-572
hsa-miR-5739	hsa-miR-5739
hsa-miR-575	hsa-miR-575
hsa-miR-587	hsa-miR-587
hsa-miR-591	hsa-miR-591
hsa-miR-593-3p	hsa-miR-593-3p
hsa-miR-593-5p	hsa-miR-593-5p
hsa-miR-595	hsa-miR-595
hsa-miR-596	hsa-miR-596
hsa-miR-601	hsa-miR-601
hsa-miR-603	hsa-miR-603
hsa-miR-606	hsa-miR-606
hsa-miR-6068	hsa-miR-6068
hsa-miR-6069	hsa-miR-6069
hsa-miR-6070	hsa-miR-6070
hsa-miR-6071	hsa-miR-6071
hsa-miR-6072	hsa-miR-6072
hsa-miR-6073	hsa-miR-6073
hsa-miR-6074	hsa-miR-6074
hsa-miR-6075	hsa-miR-6075
hsa-miR-6076	hsa-miR-6076
hsa-miR-6077	hsa-miR-6077
hsa-miR-6078	hsa-miR-6078
hsa-miR-6079	hsa-miR-6079
hsa-miR-608	hsa-miR-608
hsa-miR-6080	hsa-miR-6080
hsa-miR-6081	hsa-miR-6081
hsa-miR-6082	hsa-miR-6082
hsa-miR-6083	hsa-miR-6083
hsa-miR-6084	hsa-miR-6084
hsa-miR-6085	hsa-miR-6085
hsa-miR-6086	hsa-miR-6086
hsa-miR-6088	hsa-miR-6088
hsa-miR-609	hsa-miR-609
hsa-miR-6090	hsa-miR-6090
hsa-miR-611	hsa-miR-611
hsa-miR-6124	hsa-miR-6124
hsa-miR-6126	hsa-miR-6126
hsa-miR-6127	hsa-miR-6127
hsa-miR-6128	hsa-miR-6128
hsa-miR-6129	hsa-miR-6129
hsa-miR-613	hsa-miR-613
hsa-miR-6130	hsa-miR-6130
hsa-miR-6131	hsa-miR-6131
hsa-miR-6133	hsa-miR-6133
hsa-miR-6134	hsa-miR-6134
hsa-miR-614	hsa-miR-614
hsa-miR-6165	hsa-miR-6165
hsa-miR-617	hsa-miR-617
hsa-miR-619-3p	hsa-miR-619-3p
hsa-miR-620	hsa-miR-620
hsa-miR-621	hsa-miR-621
hsa-miR-623	hsa-miR-623
hsa-miR-626	hsa-miR-626
hsa-miR-630	hsa-miR-630
hsa-miR-631	hsa-miR-631
hsa-miR-633	hsa-miR-633
hsa-miR-634	hsa-miR-634
hsa-miR-635	hsa-miR-635
hsa-miR-637	hsa-miR-637
hsa-miR-638	hsa-miR-638
hsa-miR-640	hsa-miR-640
hsa-miR-642b-3p	hsa-miR-642b-3p
hsa-miR-642b-5p	hsa-miR-642b-5p
hsa-miR-644a	hsa-miR-644a
hsa-miR-645	hsa-miR-645
hsa-miR-646	hsa-miR-646
hsa-miR-647	hsa-miR-647
hsa-miR-648	hsa-miR-648
hsa-miR-649	hsa-miR-649
hsa-miR-6499-3p	hsa-miR-6499-3p
hsa-miR-650	hsa-miR-650
hsa-miR-6502-3p	hsa-miR-6502-3p
hsa-miR-6506-3p	hsa-miR-6506-3p
hsa-miR-6512-3p	hsa-miR-6512-3p
hsa-miR-658	hsa-miR-658
hsa-miR-661	hsa-miR-661
hsa-miR-668-5p	hsa-miR-668-5p
hsa-miR-6715b-5p	hsa-miR-6715b-5p
hsa-miR-6719-3p	hsa-miR-6719-3p
hsa-miR-6722-3p	hsa-miR-6722-3p
hsa-miR-6722-5p	hsa-miR-6722-5p
hsa-miR-6727-3p	hsa-miR-6727-3p
hsa-miR-6728-3p	hsa-miR-6728-3p
hsa-miR-6736-3p	hsa-miR-6736-3p
hsa-miR-6737-5p	hsa-miR-6737-5p
hsa-miR-6743-5p	hsa-miR-6743-5p
hsa-miR-6745	hsa-miR-6745
hsa-miR-6752-3p	hsa-miR-6752-3p
hsa-miR-6752-5p	hsa-miR-6752-5p
hsa-miR-6753-5p	hsa-miR-6753-5p
hsa-miR-6756-5p	hsa-miR-6756-5p
hsa-miR-6757-3p	hsa-miR-6757-3p
hsa-miR-6765-5p	hsa-miR-6765-5p
hsa-miR-6767-3p	hsa-miR-6767-3p
hsa-miR-6768-3p	hsa-miR-6768-3p
hsa-miR-6773-3p	hsa-miR-6773-3p
hsa-miR-6778-3p	hsa-miR-6778-3p
hsa-miR-6778-5p	hsa-miR-6778-5p
hsa-miR-6780a-3p	hsa-miR-6780a-3p
hsa-miR-6784-5p	hsa-miR-6784-5p
hsa-miR-6785-3p	hsa-miR-6785-3p
hsa-miR-6790-5p	hsa-miR-6790-5p
hsa-miR-6806-5p	hsa-miR-6806-5p
hsa-miR-6808-5p	hsa-miR-6808-5p
hsa-miR-6809-3p	hsa-miR-6809-3p
hsa-miR-6811-3p	hsa-miR-6811-3p
hsa-miR-6813-3p	hsa-miR-6813-3p
hsa-miR-6816-5p	hsa-miR-6816-5p
hsa-miR-6822-3p	hsa-miR-6822-3p
hsa-miR-6823-3p	hsa-miR-6823-3p
hsa-miR-6828-3p	hsa-miR-6828-3p
hsa-miR-6829-3p	hsa-miR-6829-3p
hsa-miR-6835-3p	hsa-miR-6835-3p
hsa-miR-6838-3p	hsa-miR-6838-3p
hsa-miR-6839-3p	hsa-miR-6839-3p
hsa-miR-6845-3p	hsa-miR-6845-3p
hsa-miR-6846-3p	hsa-miR-6846-3p
hsa-miR-6848-3p	hsa-miR-6848-3p
hsa-miR-6849-5p	hsa-miR-6849-5p
hsa-miR-6851-3p	hsa-miR-6851-3p
hsa-miR-6852-3p	hsa-miR-6852-3p
hsa-miR-6853-5p	hsa-miR-6853-5p
hsa-miR-6854-3p	hsa-miR-6854-3p
hsa-miR-6857-5p	hsa-miR-6857-5p
hsa-miR-6860	hsa-miR-6860
hsa-miR-6861-3p	hsa-miR-6861-3p
hsa-miR-6863	hsa-miR-6863
hsa-miR-6867-3p	hsa-miR-6867-3p
hsa-miR-6868-5p	hsa-miR-6868-5p
hsa-miR-6869-3p	hsa-miR-6869-3p
hsa-miR-6870-5p	hsa-miR-6870-5p
hsa-miR-6872-3p	hsa-miR-6872-3p
hsa-miR-6872-5p	hsa-miR-6872-5p
hsa-miR-6878-3p	hsa-miR-6878-3p
hsa-miR-6883-5p	hsa-miR-6883-5p
hsa-miR-6888-5p	hsa-miR-6888-5p
hsa-miR-6890-3p	hsa-miR-6890-3p
hsa-miR-6893-3p	hsa-miR-6893-3p
hsa-miR-7106-3p	hsa-miR-7106-3p
hsa-miR-7107-3p	hsa-miR-7107-3p
hsa-miR-7107-5p	hsa-miR-7107-5p
hsa-miR-711	hsa-miR-711
hsa-miR-7112-3p	hsa-miR-7112-3p
hsa-miR-7112-5p	hsa-miR-7112-5p
hsa-miR-7150	hsa-miR-7150
hsa-miR-7153-3p	hsa-miR-7153-3p
hsa-miR-7153-5p	hsa-miR-7153-5p
hsa-miR-7154-3p	hsa-miR-7154-3p
hsa-miR-7154-5p	hsa-miR-7154-5p
hsa-miR-7157-5p	hsa-miR-7157-5p
hsa-miR-7159-3p	hsa-miR-7159-3p
hsa-miR-7159-5p	hsa-miR-7159-5p
hsa-miR-7160-3p	hsa-miR-7160-3p
hsa-miR-7160-5p	hsa-miR-7160-5p
hsa-miR-7161-3p	hsa-miR-7161-3p
hsa-miR-7161-5p	hsa-miR-7161-5p
hsa-miR-7162-3p	hsa-miR-7162-3p
hsa-miR-7162-5p	hsa-miR-7162-5p
hsa-miR-718	hsa-miR-718
hsa-miR-7515	hsa-miR-7515
hsa-miR-759	hsa-miR-759
hsa-miR-761	hsa-miR-761
hsa-miR-762	hsa-miR-762
hsa-miR-7702	hsa-miR-7702
hsa-miR-8052	hsa-miR-8052
hsa-miR-8053	hsa-miR-8053
hsa-miR-8054	hsa-miR-8054
hsa-miR-8055	hsa-miR-8055
hsa-miR-8056	hsa-miR-8056
hsa-miR-8057	hsa-miR-8057
hsa-miR-8058	hsa-miR-8058
hsa-miR-8059	hsa-miR-8059
hsa-miR-8060	hsa-miR-8060
hsa-miR-8062	hsa-miR-8062
hsa-miR-8063	hsa-miR-8063
hsa-miR-8064	hsa-miR-8064
hsa-miR-8065	hsa-miR-8065
hsa-miR-8066	hsa-miR-8066
hsa-miR-8067	hsa-miR-8067
hsa-miR-8068	hsa-miR-8068
hsa-miR-8069	hsa-miR-8069
hsa-miR-8070	hsa-miR-8070
hsa-miR-8071	hsa-miR-8071
hsa-miR-8073	hsa-miR-8073
hsa-miR-8074	hsa-miR-8074
hsa-miR-8075	hsa-miR-8075
hsa-miR-8076	hsa-miR-8076
hsa-miR-8077	hsa-miR-8077
hsa-miR-8078	hsa-miR-8078
hsa-miR-8079	hsa-miR-8079
hsa-miR-8080	hsa-miR-8080
hsa-miR-8081	hsa-miR-8081
hsa-miR-8082	hsa-miR-8082
hsa-miR-8083	hsa-miR-8083
hsa-miR-8084	hsa-miR-8084
hsa-miR-8085	hsa-miR-8085
hsa-miR-8086	hsa-miR-8086
hsa-miR-8087	hsa-miR-8087
hsa-miR-8088	hsa-miR-8088
hsa-miR-8089	hsa-miR-8089
hsa-miR-888-3p	hsa-miR-888-3p
hsa-miR-891a-3p	hsa-miR-891a-3p
hsa-miR-892c-5p	hsa-miR-892c-5p
hsa-miR-920	hsa-miR-920
hsa-miR-922	hsa-miR-922
hsa-miR-924	hsa-miR-924
hsa-miR-938	hsa-miR-938
hsa-miR-9500	hsa-miR-9500
