# Supplementary material for: Toward the human cellular microRNAome
Source: HighWire-hosted journal article supplement (doi:10.1101/gr.222067.117), 2017-09-06
Supplement: Supplemental_Table_S2.xlsx [file Supplemental_Table_S2.xlsx]

## Sheet: Sheet1
Cell Type	Unique to this study	SRA Number	Sex	Input Reads	miRNA Reads	Unique miRNAs	Hairpin miRNA	Other ncRNA	mRNA Reads	Remaining Reads
Astrocyte	Yes	SRR5127214	Unknown	16314120	10090420	829	21239	2671868	75110	3378058
B Cell Centroblast		SRR060981	Unknown	5816980	3510444	607	2842	264689	104550	1511369
B Cell Centrocyte		SRR060982	Unknown	5467515	3100239	566	4937	258427	72409	1621507
B Cell CD77+		SRR1209512	Unknown	3496114	3460019	498	0*	10042	11618	7045
B Cell CD77+		SRR1209513	Unknown	2419509	2398752	461	0*	4018	4607	8113
B Cell CD77+		SRR1209514	Unknown	3318326	3290622	501	0*	5265	6938	9619
B Cell CD77+		SRR1209515	Unknown	2421418	2396794	497	0*	4591	5060	10105
B Cell memory		SRR060986	Unknown	3551579	1658174	413	6309	108640	25828	1213006
B Cell naive		SRR060985	Unknown	5207938	3245224	449	1788	185611	27105	1674037
B Cell Pre-germinal center		SRR060983	Unknown	6774665	4409288	623	2838	203559	74558	1812874
Biliosphere		ERR842903	Unknown	14801610	11297065	744	14058	1005996	56792	2304296
Biliosphere		ERR842904	Unknown	9481830	6120496	715	10050	823643	116530	2367844
Biliosphere		ERR842905	Unknown	12005084	8910422	787	16004	1128727	201075	1669915
Biliosphere		ERR842906	Unknown	12882062	9443718	841	16162	1217338	98237	2033761
Biliosphere		ERR842911	Unknown	10592041	7582421	581	11680	896942	43519	1978381
Biliosphere		ERR842914	Unknown	14608114	11355743	591	18521	1170308	36798	1939584
Biliosphere		ERR842916	Unknown	21830801	17774558	891	7719	2474813	110217	1412465
Biliosphere		ERR842917	Unknown	13450631	10317764	729	15408	1205316	56480	1785183
Monocyte CD14+		SRR527681	Unknown	35935988	9681214	535	0*	12420273	710985	13102308
T Cell CD3+	Yes	SRR5127200	Unknown	25579464	7173336	663	34857	13628810	535308	1993273
T Cell CD4+		SRR1532971	Unknown	22521562	6779608	672	12503	8492188	475679	6317527
T Cell CD4+		SRR1532972	Unknown	18474519	8326237	703	19007	5141151	270340	4313091
T Cell CD4+		SRR1532973	Unknown	19039464	8083133	696	18532	5497030	214312	4912548
T Cell CD8+ (Adult)		SRR1853806	Unknown	5054443	1560824	421	1812	1945989	101186	1313841
T Cell CD8+ (Neonatal)		SRR1853807	Unknown	4071904	2061590	364	1518	1152859	61428	685701
T Cell CD8+ (Neonatal)		SRR1853808	Unknown	2306627	1016083	312	960	800943	37503	394674
T Cell CD8+ (Neonatal)		SRR1853809	Unknown	2444673	1056895	328	1230	869566	64602	394736
Chondrocyte	Yes	SRR5127229	Male	12973801	8087049	836	26549	2493985	110231	2181549
Corona Radiata		ERR457736	Unknown	14547113	10854940	807	938	2045032	309758	1200042
Cumulus Oophorus		ERR457737	Unknown	15213152	11053277	869	642	1993818	340637	1422080
Dendritic		SRR1708906	Unknown	9554925	6847006	719	8856	951512	109438	1447055
Dendritic		SRR1708907	Unknown	7600117	4960011	695	9088	1178576	124777	1267397
Dendritic		SRR1708908	Unknown	8613873	5894542	697	8281	1154219	112716	1401226
Dendritic		SRR1708909	Unknown	9833352	4495752	663	10505	2744785	155063	2385705
Dendritic		SRR1708910	Unknown	10608242	6967077	732	10473	1529056	140735	1878388
Dendritic		SRR1708911	Unknown	6430037	4751102	676	5881	686001	103726	643652
Dendritic		SRR1708912	Unknown	8030392	5773475	732	7804	680238	86291	1442800
Dendritic		SRR1708913	Unknown	10509919	7742751	748	11977	1024147	131279	1178138
Dendritic		SRR1708914	Unknown	7004041	5375322	646	6862	632847	98665	864749
Dendritic		SRR1708915	Unknown	12227934	8488561	772	10393	1185699	148210	2322018
Dendritic		SRR1708916	Unknown	10459858	7657312	743	8888	896489	131635	1719175
Dendritic		SRR1708917	Unknown	11627748	9145062	793	9544	894150	136847	1377594
Dendritic		SRR1708918	Unknown	7872123	5753650	720	6886	938461	77594	1060426
Dendritic		SRR1708919	Unknown	10890429	6861109	674	9174	1284172	141465	2562509
Dendritic		SRR1708920	Unknown	14200501	9283922	818	12166	1837561	197421	2006948
Dendritic		SRR1708921	Unknown	11857869	8583714	800	8744	1874062	170538	1166362
Dendritic		SRR1708922	Unknown	13075666	9818994	778	10693	1558394	147860	1501154
Dendritic		SRR1708923	Unknown	8369421	6040190	701	5974	1077710	106562	1120349
Endothelial, Aortic	Yes	SRR5139121	Female	12102360	7613439	714	23411	1787711	90961	2519231
Endothelial, Coronary	Yes	SRR5127228	Male	28399093	19695724	844	26225	3471191	205808	1875579
Endothelial, Microvascular	Yes	SRR5127201	Male	15198715	8586396	812	20984	3340179	124441	3088300
Endothelial, Umbilical vein	Yes	SRR5127213	Female	9651675	5913560	770	16630	1395323	85394	2184089
Epithelium, Bronchial	Yes	SRR5127216	Male	12763607	7443262	800	51043	2679688	96860	2453081
Epithelium, Colonic Epithelium	Yes	SRR5127219	Unknown	43883335	7093764	608	19790	21495832	2409731	6799075
Epithelium, Intestinal	Yes	SRR5127223	Female	13041284	8290061	839	21367	2671836	91483	1912658
Epithelium, Keratinocyte (Adult)	Yes	SRR5127203	Male	9174711	4736577	688	43381	1939377	65320	2322385
Epithelium, Keratinocyte (Neonatal)	Yes	SRR5127208	Male	12957891	5483977	710	49026	3701314	110265	3496844
Epithelium, Mammary	Yes	SRR5127224	Female	12000669	7182893	859	54573	2318261	126509	2239552
Epithelium, Prostate	Yes	SRR5127212	Male	15155208	8424630	795	53316	3804397	124811	2376741
Epithelium, Renal	Yes	SRR5127235	Unknown	12716592	8388373	830	38930	1475295	105550	2638033
Epithelium, Renal Cortex	Yes	SRR5127204	Female	21250840	15337788	855	53436	2613526	144205	3059140
Epithelium, Renal Proximal	Yes	SRR5127230	Female	18315846	12761052	857	39866	2705564	134281	2608870
Epithelium, Retinal Pigment	Yes	SRR5127210	Unknown	10122884	5800740	758	23090	1546756	83437	2604140
Epithelium, Retinal Pigment		SRR493011	Unknown	13025764	7432516	830	2012	1980511	181029	1081945
Epithelium, Retinal Pigment		SRR493013	Unknown	13316188	6434196	797	2156	2508757	175878	2100929
Epithelium, Retinal Pigment		SRR493015	Unknown	10806312	2951929	724	4628	2979092	163101	1258339
Fibroblast, Aorta Adventitia	Yes	SRR5127206	Male	14785824	8119462	725	12767	3426977	56256	3096262
Fibroblast, Cardiac	Yes	SRR5127236	Male	31950817	7689157	836	13171	18275467	133509	5766520
Fibroblast, Coronary Artery	Yes	SRR5127231	Male	11018389	4863803	636	9033	1913055	72033	2267671
Fibroblast, Dermal (Adult)	Yes	SRR5127205	Female	11598810	7659157	713	19357	1617814	57956	2183762
Fibroblast, Dermal (Neonatal)	Yes	SRR5127225	Male	10993005	6743487	780	28658	1441619	81611	2640831
Fibroblast, Lung		SRR1988283	Unknown	17198144	5145114	761	15845	1992774	103803	9812061
Fibroblast, Lung		SRR1988284	Unknown	14033384	3617170	719	11626	1542838	75622	8680375
Fibroblast, Lung		SRR1988285	Unknown	13534259	3492588	734	11132	1650619	94502	7748715
Fibroblast, Lung		SRR1988286	Unknown	20515658	5524329	806	18329	2692736	145457	8758595
Fibroblast, Periodonal ligament	Yes	SRR5127227	Female	11212707	6577918	714	28301	1945054	68598	2517567
H7 ESC		SRR1636959	Unknown	8779535	3627472	583	3785	984882	102100	826687
H9 Differentiated Forebrain		SRR1988291	Unknown	13423017	3600481	798	5599	1416604	111408	8145285
H9 Differentiated Forebrain		SRR1988292	Unknown	13274444	3621421	766	5826	1328864	96327	8088857
H9 Differentiated Forebrain		SRR1988293	Unknown	13977971	4154476	792	6526	1479821	107842	8081787
H9 Differentiated Forebrain		SRR1988294	Unknown	13599066	3887685	758	6312	1458289	100634	8016498
H9 Differentiated Mesenchymal		SRR1988295	Unknown	11719155	2580338	752	18598	1780597	86717	6766037
H9 Differentiated Mesenchymal		SRR1988296	Unknown	11602378	2815219	793	19571	1928655	97112	6581573
H9 Differentiated Mesenchymal		SRR1988297	Unknown	14109809	3316860	794	22498	2304951	120264	8132044
H9 Differentiated Mesenchymal		SRR1988298	Unknown	18349215	3729375	839	25764	3200069	163660	10933343
H9 Differentiated Midbrain		SRR1988299	Unknown	9831491	3713809	765	7231	990643	76942	4894224
H9 Differentiated Midbrain		SRR1988300	Unknown	13392035	5434803	849	8646	1346951	109209	6318739
H9 Differentiated Midbrain		SRR1988301	Unknown	13802055	5433278	826	8904	1311809	108786	6772149
H9 Differentiated Midbrain		SRR1988302	Unknown	14375463	5590144	844	9193	1422167	112848	6980825
H9 ESC		SRR1988287	Unknown	8673681	1597761	769	26199	2391395	127738	4469344
H9 ESC		SRR1988288	Unknown	8247735	1505220	753	24325	2275260	132480	4221737
H9 ESC		SRR1988289	Unknown	16693032	1958107	863	29335	3445891	161513	10968326
H9 ESC		SRR1988290	Unknown	15874754	1604296	754	30532	3631415	172083	10199584
H9 ESC		SRR350510	Unknown	31814185	5582541	760	19824	1238813	210924	18594635
iPSC-CM		SRR1542718	Unknown	3085962	1093754	529	2609	268402	43121	736842
Islet Alpha Cell		SRR1028924	Unknown	82497527	44124538	912	32329	5794439	311984	20068067
Islet Beta Cell		SRR1028925	Unknown	71708511	17147456	742	8318	754995	76358	41094413
Islet Beta Cell		SRR871671	Male	4786141	3012883	507	1475	223329	28208	111135
Islet Beta Cell		SRR873401	Female	41497020	35594179	902	27214	3593624	161142	1035320
Islet Beta Cell		SRR873410	Female	33233648	26142908	844	11426	4409688	224800	958325
Macrophage		ERR356515	Unknown	9661686	2034615	617	0*	1526972	104862	5181223
Macrophage		ERR356520	Unknown	3926133	1359381	498	0*	450564	59866	1856665
Macrophage		ERR356521	Unknown	20494214	5034357	728	0*	3493693	284097	9984700
Macrophage		ERR356519	Unknown	7892759	1616938	606	0*	763699	69791	4964221
Macrophage		SRR1532974	Unknown	26113239	4408852	776	7806	1447172	89071	20051236
Macrophage		SRR1532975	Unknown	16181396	4022373	890	11665	2370607	169479	9448840
Melanocyte	Yes	SRR5127207	Female	6951353	2756408	559	7491	3156790	21808	990083
Melanocyte		SRR1913137	Unknown	18049109	10516774	737	13650	1421193	97637	5550666
Mesangial	Yes	SRR5127221	Female	12711720	8026449	743	23437	2008326	58419	2439951
Monocyte		SRR926589	Unknown	10279664	9026379	716	6131	875129	66759	266847
Myoblast, Skeletal Muscle	Yes	SRR5127218	Female	13592707	9022845	877	27024	2338612	117213	2024622
Myoblast, Skeletal Muscle		SRR1055962	Unknown	11503540	9600892	629	8444	360925	39303	1376445
Myoblast, Skeletal Muscle		SRR1200834	Unknown	12129169	10899402	639	9756	229572	32897	905716
Myoblast, Skeletal Muscle		SRR1200890	Unknown	13429149	11684362	620	15445	338191	62179	1231679
Myofibroblast	Yes	SRR5127220	Unknown	12737293	7600168	928	18577	2735198	105642	2230859
Myotube, Skeletal Muscle		SRR1055961	Unknown	15093056	13998426	577	9259	395158	23232	615533
Myotube, Skeletal Muscle		SRR1055963	Unknown	14281046	13421138	575	7949	297922	19483	496871
Myotube, Skeletal Muscle		SRR1200888	Unknown	13540248	12871382	538	5859	232381	20857	368497
Neural Stem Cell		SRR1988280	Unknown	11729013	3128501	749	3895	1612295	67568	6821626
Neural Stem Cell		SRR1988281	Unknown	8716773	2373755	727	3427	1476753	71864	4674684
Neural Stem Cell		SRR1988282	Unknown	11149377	2969875	767	3892	1790567	72161	6220549
Neuron, Cortical	Yes	SRR5127209	Unknown	51604025	35739564	1174	53112	9961372	357925	5344807
Neuron, Dopaminergic	Yes	SRR5127234	Unknown	40546667	20274159	1242	94850	13469890	291158	6324493
Neuron, iPSC		SRR1777161	Unknown	20584002	8651032	1064	15263	7575169	152865	2687936
Neuron, iPSC		SRR1777162	Unknown	6508122	3000533	811	5144	1966609	43649	1478704
Neuron, iPSC		SRR1777163	Unknown	6965019	3751568	831	4573	2016255	59323	792044
Neuron, iPSC		SRR1777164	Unknown	9393294	5605852	904	5952	2374815	63503	821481
Neuron, iPSC		SRR1777165	Unknown	7222641	4563813	824	4977	1253818	52462	929532
Neuron, iPSC		SRR1777166	Unknown	9910355	5335445	950	8469	2674305	84047	1560192
Neuron, iPSC		SRR1777167	Unknown	7970417	3862166	839	4214	1741626	45114	1640212
Neuron, iPSC		SRR1777168	Unknown	18381758	10026332	1053	13126	5063206	209493	2282175
Neuron, iPSC		SRR1777169	Unknown	20134645	12135291	1103	15098	4610562	202059	1946069
Osteoblast	Yes	SRR5127233	Male	20022000	9938360	706	29947	5238923	60232	4663204
Plasma Cell		SRR060984	Unknown	5760642	3570870	543	3052	288900	81803	1484857
Platelet		ERR747965	Unknown	4868333	2790563	414	3241	460666	4391	897313
Platelet		ERR747966	Unknown	4261725	2384268	403	2764	388684	3749	837923
Platelet		ERR747967	Unknown	4546753	2608969	437	3284	421856	4424	878123
Platelet		SRR1592244	Unknown	17692965	15555524	521	15427	1208958	14427	283599
Platelet		SRR1592245	Unknown	16713448	15077442	503	27357	1015126	10451	212123
Platelet		SRR1592246	Unknown	31614208	29747324	624	36191	1183276	19589	461130
Platelet		SRR1592247	Unknown	9927231	9231702	329	4458	452676	4045	130804
Platelet		SRR1592248	Unknown	21196809	19818993	566	17046	654083	16639	279772
Platelet		SRR1592249	Unknown	28515834	3711366	689	10101	19299175	165823	3839486
Red Blood Cell	Yes	SRR5127232	Male	24526629	21889165	682	25741	1625319	40173	398951
Red Blood Cell		SRR1664893	Unknown	17692965	15555524	521	15427	1208958	14427	283599
Red Blood Cell		SRR1664894	Unknown	16713448	15077442	503	27357	1015126	10451	212123
Red Blood Cell		SRR1664895	Unknown	31614208	29747324	624	36191	1183276	19589	461130
Red Blood Cell		SRR1664896	Unknown	9927231	9231702	329	4458	452676	4045	130804
Red Blood Cell		SRR1664897	Unknown	21196809	19818993	566	17046	654083	16639	279772
Skeletal Muscle Cell	Yes	SRR5127202	Female	9192954	4727275	757	19937	1900920	63251	2425820
Smooth Muscle Cell, Aorta	Yes	SRR5127217	Female	17834771	7999044	717	13237	5379837	49230	4313765
Smooth Muscle Cell, Aorta	Yes	SRR5127211	Male	26916970	14426058	897	17900	7405823	168812	1567029
Smooth Muscle Cell, Bladder	Yes	SRR5127215	Female	17299457	7198654	729	8904	5373240	62237	4568106
Smooth Muscle Cell, Prostate	Yes	SRR5127222	Male	14008264	8375587	854	19309	3195713	94811	2283942
Stromal cell, Prostate	Yes	SRR5127226	Male	13613209	8217155	860	18320	2871655	94181	2362335
Valve Interstitial Cell		SRR948071	Unknown	4000000	2929851	465	3434	393901	13905	316240
Valve Interstitial Cell		SRR948072	Unknown	4000000	2914452	468	3501	417001	14560	306207
Valve Interstitial Cell		SRR948073	Unknown	4000000	2804138	441	3225	365437	13618	386868
Valve Interstitial Cell		SRR948074	Unknown	4000000	2862465	459	2932	268323	13029	261259
Valve Interstitial Cell		SRR948075	Unknown	4000000	3073345	465	4181	457342	12473	282974
Valve Interstitial Cell		SRR948076	Unknown	4000000	2964135	462	2945	300045	12982	263804
						AVERAGE
* = No hairpin reads due to alignment method				2329481747	1273974684	704.776	2309812	389254976	19452605	543983463
						729
						MEDIAN
