# Supplementary material for: Toward the human cellular microRNAome
Source: HighWire-hosted journal article supplement (doi:10.1101/gr.222067.117), 2017-09-06
Supplement: Supplemental_Table_S3.xlsx [file Supplemental_Table_S3.xlsx]

## Sheet: Sheet1
CellLine	SRA Number	Cancer type	Input Reads	miRNA Reads	UniquemiRNAs	Hairpin miRNA	Other ncRNA	mRNA Reads	Remaining Reads
THP1	SRR2296788	Monocytic leukemia	1536532	1110522	449	5057	272135	13883	132169
HepG2	ERR738403	Hepatocellular carcinoma	5382000	3141969	714	22513	1061603	118172	729829
HepG2	ERR738404	Hepatocellular carcinoma	5377422	3192300	714	18538	778758	105895	610467
HepG2	ERR738405	Hepatocellular carcinoma	7592141	3980034	728	21189	1073504	120899	762952
HepG2	ERR738406	Hepatocellular carcinoma	10583058	5136084	786	22597	1804898	143360	873289
HepG2	ERR738411	Hepatocellular carcinoma	7022260	3656271	746	27522	1096589	146274	932201
HepG2	ERR738413	Hepatocellular carcinoma	10074914	3702106	732	25632	3447705	349550	1570271
HepG2	ERR738414	Hepatocellular carcinoma	7980518	3790423	749	14168	530916	98887	530749
HepG2	ERR738415	Hepatocellular carcinoma	7849915	4054262	728	28949	1642073	157396	1333093
HepG2	ERR738416	Hepatocellular carcinoma	6130491	3139443	713	18736	564563	92685	658783
HepG2	ERR738417	Hepatocellular carcinoma	10012711	4722176	782	21686	1154476	120234	688783
ZR75.1	ERR372263	Breast ductal carcinoma	16969115	6311910	764	60639	3561583	175454	6826683
ZR75.1	ERR372264	Breast ductal carcinoma	16734845	6228803	792	60807	3512171	172605	6728624
ZR75.1	ERR372265	Breast ductal carcinoma	16810339	6263811	776	60660	3526899	173862	6751912
Hep3B	SRR2085171	Hepatocellular carcinoma	18838816	2310913	639	74029	11131887	203346	4970550
Huh7	SRR2085172	Hepatocellular carcinoma	11247335	6478197	699	37421	1801226	102199	2477639
DKO1	SRR1917323	Colon adenocarcinoma	28766854	19484456	1047	33635	3900066	414533	3457443
DKO1	SRR1917324	Colon adenocarcinoma	31785155	23185178	1029	32371	3221102	366042	3522851
DKO1	SRR1917325	Colon adenocarcinoma	23170483	15998669	987	33952	3108519	263705	2684621
DLD1	SRR1917335	Colon adenocarcinoma	29843240	19563656	1042	37446	4475547	343426	3801590
DLD1	SRR1917336	Colon adenocarcinoma	49843294	33309583	1169	57832	5722047	714308	6373279
DLD1	SRR1917337	Colon adenocarcinoma	38176262	21966996	1104	53877	6804538	985533	5563245
DKS8	SRR1917329	Colon adenocarcinoma	62920619	41947440	1285	82704	9001294	780793	7321781
DKS8	SRR1917330	Colon adenocarcinoma	39707715	26796614	1153	51394	5728963	486114	4501145
DKS8	SRR1917331	Colon adenocarcinoma	25397849	15110806	1033	33896	5020899	368552	3350915
A375	SRR1913138	Melanoma	25047555	9520704	1052	21723	6330506	260098	5020865
A2058	SRR1913139	Melanoma	23191616	4836033	886	10038	6925686	124720	6170980
LNCaP	SRR1810079	Prostate adenocarcinoma	30160175	11745871	748	118402	10166333	289874	7621407
BicR	SRR1810082	Tongue squamous carcinoma	11916010	4488025	623	22154	2891916	68014	3061130
HeLa	SRR1575597	Cervical cancer	5161575	2026123	690	8594	922999	133147	1303022
MCF7	ERR227915	Breast adenocarcinoma	6075950	4704311	598	19260	577235	39506	219356
MCF7	ERR227916	Breast adenocarcinoma	6085784	4716954	619	19395	581645	41213	213692
MCF7	ERR227917	Breast adenocarcinoma	6071484	4661250	603	18575	565757	38142	225098
HDMYZ	SRR1535276	Hodgkin lymphoma	20946561	2905357	639	9576	114281	171102	17583922
HDMYZ	SRR1535278	Hodgkin lymphoma	17853166	2705898	664	10980	137038	122448	14689879
THP1	DRR000555	Monocytic leukemia	8372793	3156008	439	29823	864422	46214	2893924
THP1	DRR000559	Monocytic leukemia	7919843	3223984	384	14130	373854	22754	2886830
HeLa	SRR1304304	Cervical cancer	37526248	18380005	1175	20729	1774143	663704	16090525
C8166	SRR1304307	T cell leukemia	17027396	10633117	881	76050	3818815	308037	1943230
A549	SRR1304309	Lung Adenocarcinoma	24440476	18690474	1001	63746	709447	200353	4688321
SH-SY5Y	SRR1304311	Neuroblastoma	18119273	16269394	861	5713	509830	75236	1209197
LCLB-cell	SRR1304313	B cell lymphoblastoid	36077584	18522919	934	64553	6172038	432724	10624776
Hela	SRR1532965	Cervical cancer	19039328	13388700	827	58799	1121412	210862	4172381
Hela	SRR1532966	Cervical cancer	13829752	8941678	762	80801	1905133	211880	2360635
A549	SRR1240814	Lung Adenocarcinoma	8657172	3512779	765	16040	1925325	136347	1098743
A549	SRR1240815	Lung Adenocarcinoma	7826481	3079386	746	15055	1766515	118254	901392
HeLa	SRR1240812	Cervical cancer	32406894	4489637	795	28973	1689573	234926	1605733
HeLa	SRR1240813	Cervical cancer	8168749	3566282	719	16948	1815565	181983	1105385
HEK293	SRR1240816	Embryonic kidney	11128383	5286736	902	27926	2072125	206134	1712215
HEK293	SRR1240817	Embryonic kidney	9986630	5044803	896	25814	1725430	175827	1517191
HCT116	SRR1264358	Colon adenocarcinoma	2112683	1401105	544	3341	110591	11862	498317
Jurkat	SRR1292458	T cell leukemia	28916859	8669635	893	35447	1538552	280369	7611219
Jurkat	SRR1292461	T cell leukemia	21966524	12246029	886	30404	1357191	275152	5099219
Jurkat	SRR1292463	T cell leukemia	22155367	7869395	881	26023	1916279	290420	7516338
Beas-2B	SRR1159512	Immortalized bronchial epithelial	11040942	4284896	877	28558	1639220	215441	2605466
Hela	SRR029124	Cervical cancer	4712823	2088976	705	0*	768648	94447	1722399
U2OS	SRR029125	Osteosarcoma	5202155	2017497	828	0*	190084	29717	2940949
143B	SRR029126	Osteosarcoma	3387984	1810658	659	0*	310833	66563	1181927
A549	SRR029127	Lung adenocarcinoma	4040969	1325914	627	0*	606488	37727	2038885
H520	SRR029128	Lung squamous carcinoma	4553433	1015113	785	0*	313852	39198	3165299
SW480	SRR029129	Colon adenocarcinoma	4811193	2083640	597	0*	223011	20444	2454057
DLD2	SRR029130	Colon adenocarcinoma	3474230	1268383	588	0*	241566	22085	1926577
MCF7	SRR029131	Breast adenocarcinoma	4152385	2440256	604	0*	355149	28869	1291793
HEK293	SRR515902	Embryonic kidney	21778336	2699961	783	3176	14420962	232844	1735436
MCF7	SRR873382	Breast adenocarcinoma	34686701	27689780	1210	11708	862253	209710	2249492
MCF7	SRR873383	Breast adenocarcinoma	34822872	26994957	1185	14956	830151	203730	2854099
MIHA	SRR596003	Immortalized hepatocyte cell	14598811	2163737	129	8761	5408864	54502	6658337
HepG2	SRR609258	Hepatocellular carcinoma	14163632	11640913	704	7205	633797	60643	1731977
IMR90	SRR020286	Fibroblast strain	9023849	6087116	747	10004	709437	63852	1129452
Fadu	SRR1732015	Hypopharnyx squamous carcinoma	14403977	4227133	697	17386	5012419	286446	2810547
Mammary Epithelial	SRR433866	Immortalized mammary epithelial	38346007	11181064	877	29214	5885217	286139	2677596
Mammary Epithelial	SRR433867	Immortalized mammary epithelial	35975387	9851007	885	34146	7484860	432544	3367084
Mammary Epithelial	SRR433868	Immortalized mammary epithelial	33921150	12130375	846	34635	5168216	150966	2001661
A549	SRR1013967	Lung adenocarcinoma	14998339	10987063	982	92738	1168226	172907	1405605
A549	SRR1013968	Lung adenocarcinoma	14763930	10797421	974	90561	1139498	166351	1424835
H460	SRR1013971	Lung non-small cell cancer	17587880	13864052	992	72195	830725	215678	1972917
H460	SRR1013972	Lung non-small cell cancer	17272405	13596649	1002	69935	809854	206778	1984614
H520	SRR1013975	Lung squamous carcinoma	16640770	12027761	928	68085	1056597	233366	1600671
H520	SRR1013976	Lung squamous carcinoma	16349417	11747474	923	66017	1032012	226287	1650769
H1264	SRR1013979	Lung adenocarcinoma	17671275	11725308	1093	36748	1708566	344725	2222680
H1264	SRR1013980	Lung adenocarcinoma	17385527	11481252	1078	35876	1667174	331660	2231594
RVH6849	SRR1013983	Lung cancer	16396746	11269713	1085	161570	1177298	240283	1619874
RVH6849	SRR1013984	Lung cancer	16074373	10990312	1052	157014	1147823	231530	1642754
C8166	SRR1532969	T cell leukemia	17864839	5365422	610	53824	5629697	156270	3779842
C8166	SRR1532970	T cell leukemia	24143902	4382756	690	51733	6962108	568846	10950721
HELF977	SRR2960037	Embryonic lung fibroblast	6287040	1476724	658	6453	818726	25674	3398534
HAF1608	SRR2960040	Adult skin fibroblast	2794005	1075463	557	6424	543583	18233	812877
MCF7	SRR029054	Breast adenocarcinoma	9578655	3390876	638	3927	1163638	98816	4137989
MDA-DB-231	SRR960732	Breast adenocarcinoma	34140879	8794098	775	23659	6697680	239961	6218905
MCF10A	SRR960734	Breast Epithelium	32478664	11497264	1108	1685	2149458	212952	6204361
SUP-T1	SRR1290784	T cell lymphoma	15050361	6530106	821	24559	1271237	178712	1121723
SUP-T1	SRR1290785	T cell lymphoma	10828491	3998051	748	14011	1185687	135611	766918
SUP-T1	SRR1290786	T cell lymphoma	14079185	5112188	797	20823	1596723	181982	973830
SUP-T1	SRR1290793	T cell lymphoma	22645228	9326829	904	34393	2427317	287787	1551281
SUP-T1	SRR1290794	T cell lymphoma	11906740	5255590	749	19712	1538435	151175	770810
SUP-T1	SRR1290795	T cell lymphoma	16882615	6482227	768	27395	2285431	210794	1093069
SUP-T1	SRR1290802	T cell lymphoma	15679880	6402283	820	24629	1546872	217640	1190573
SUP-T1	SRR1290803	T cell lymphoma	12991424	5356153	780	20466	1802421	208991	1175907
NP460	SRR1564522	Nasopharyngeal epithelial cell	26865613	1486427	638	212954	14365748	478167	6628275
HK1	SRR1564521	Nasopharyngeal carcinoma	26835342	2523400	596	239578	14081133	480145	6370573
* = No hairpin reads due to alignment method					AVERAGE
			1741232555	843209452	808.72	3672975	275192291	21146197	330245320
					781
					MEDIAN
