# Supplementary material for: Toward the human cellular microRNAome
Source: HighWire-hosted journal article supplement (doi:10.1101/gr.222067.117), 2017-09-06
Supplement: Supplemental_Table_S4.xlsx [file Supplemental_Table_S4.xlsx]

## Sheet: Sheet1
Tissue	SRAnumber	Input Reads	miRNA Reads	Unique miRNAs	Hairpin miRNAs	Other ncRNAs	mRNA Reads	Remaining Reads
Adrenal	SRR944031	17003334	13431700	846	9658	2179331	164875	1077791
Adrenal	SRR944034	22251375	18691575	886	6906	1883615	147013	1437637
Adrenal	SRR944040	14234521	11150002	756	19325	997840	79482	1906649
Bladder	DRR013040	15818359	12733588	1129	905	1769657	261504	757485
Bladder	DRR013041	14913503	9431305	999	2500	3659708	375361	1248472
Bladder	DRR013042	14046476	10022393	841	640	2405397	211073	1009290
Bladder	DRR013043	14401456	10213645	1088	1260	2388451	200272	1143863
Bladder	DRR013044	13905124	9373146	1118	898	2514050	235089	1388907
Bladder	SRR333658	18961597	6559107	723	24338	8544752	489312	2225409
Bladder	SRR333660	15606203	9527511	623	9500	4053981	199546	1225697
Bladder	SRR333662	16012177	8968648	594	6610	4973414	217036	1258690
Bladder	SRR333664	14333941	10061611	615	4807	2569214	108248	875975
Bladder	SRR333666	11350981	8193843	441	1363	267670	27836	2549173
Bladder	SRR333668	17755521	3455206	778	1641	3036842	184002	9077715
Bladder	SRR333670	10019292	7102935	515	4511	2119202	91691	377139
Bladder	SRR333672	17654215	9335795	732	8617	5647904	290121	1422866
Bladder	SRR333674	19283954	6020803	687	16141	9472657	318893	2154899
Bladder Epithelium	DRR013035	16397994	15142964	777	1486	783734	33097	338616
Bladder Epithelium	DRR013036	17352333	16345217	801	2095	579179	24321	318655
Bladder Epithelium	DRR013037	17308263	16065326	804	1615	766712	31820	341275
Bladder Epithelium	DRR013038	17235561	16327970	752	2707	519238	22551	290354
Blood	SRR2201546	5954657	5296597	490	18761	319214	8439	199653
Blood	SRR2201547	5812871	5207477	470	21204	277463	7936	196516
Blood	SRR2201548	4946077	4381492	464	19810	229384	9406	218794
Blood	SRR2201549	6939169	6202390	501	19956	322186	9537	231812
Blood	SRR2201550	9861497	9084394	453	11169	291443	12403	336222
Blood	SRR2201551	7843973	6993614	512	38056	325170	9928	280231
Blood	SRR2201572	2413490	2005649	336	1885	106407	3649	291046
Blood	SRR2201573	8773043	7254461	484	14784	550533	9992	936150
Blood	SRR2061740	9305513	8720681	380	3647	174696	4022	397724
Blood	SRR2061741	9291694	8779534	385	2901	120910	3214	381759
Blood	SRR2061742	7925400	7443433	364	3095	125930	2907	347127
Blood	SRR2061743	12744054	11670004	340	7715	525231	8569	530890
Blood	SRR2061744	10484374	9698433	351	5679	355632	6616	414935
Blood	SRR2061745	12174780	11381875	400	4350	261910	6664	498334
Blood	SRR2061746	12081155	11378619	403	3944	229772	6246	459217
Blood	SRR2061747	9358395	6774520	332	5903	2037165	81360	456491
Blood	SRR2061748	8529318	6138304	313	5411	1845986	73238	464362
Blood	SRR2061749	9571142	6862109	326	6358	2153739	78713	467510
Blood	SRR1949839	11955680	11141800	286	2422	138060	2923	606963
Blood	SRR1949840	9064738	8556697	175	1560	46671	1171	439753
Blood	SRR1949841	11112653	10178944	437	3068	294808	4922	510531
Blood	SRR1949842	3848881	3534816	248	1390	121034	1184	187929
Blood	SRR1949843	5300282	4853673	297	2347	212404	2052	225272
Blood	SRR1949844	9441713	8709109	337	3840	125362	2884	515461
Blood	SRR1949845	10455735	9723400	337	2493	96351	3928	547880
Blood	SRR1949846	8519106	7930502	276	1746	94959	1892	469297
Blood	SRR1949847	5236194	4490449	251	2558	162411	6019	250050
Blood	SRR1949848	6583350	5947248	332	7276	180100	6375	277754
Blood	SRR1949849	10082339	9244481	320	4964	181733	6019	561973
Blood	SRR837471	10602248	10196322	358	677	176395	3208	130565
Blood	SRR837472	10256784	9954998	320	566	110148	2659	126915
Blood	SRR837473	10476962	9988575	384	882	131713	4066	139661
Blood	SRR837474	12085433	11739495	351	873	117621	3462	121595
Blood	SRR837475	12773942	12372779	360	682	140534	2639	146250
Blood	SRR837476	10323437	10044492	335	645	51159	3046	133477
Blood	SRR837477	19187157	18161844	412	5200	536515	7935	307317
Brain	ERR038405	22466130	5743398	685	5330	1060654	90103	14508767
Brain	ERR038406	20853533	12019264	758	3502	388029	41981	7221926
Brain	ERR038407	28977685	17745484	1077	5417	2760203	92863	7325065
Brain	ERR038408	10572027	4881075	689	2920	1341582	43219	4088917
Brain	ERR038409	12060680	5850406	754	3446	752187	242678	4780684
Brain Cerebellum	SRR553573	26787959	12296351	800	9669	2697178	472675	3983502
Brain Frontal Cortex	SRR448330	30420343	9352960	840	4622	17566097	142913	3257942
Brain Frontal Cortex	SRR448331	13889182	3286344	704	7252	8160569	304461	2100579
Brain Frontal Cortex	SRR553572	25731998	9865005	961	6032	6125111	1130600	4584020
Brain Prefrontal Cortex	SRR1759212	10697688	4852739	864	4760	3340297	91147	2389729
Brain Prefrontal Cortex	SRR1759213	11642297	6578012	958	4505	2208989	92299	2729841
Brain Prefrontal Cortex	SRR1759214	9795927	5500395	917	3356	1828723	85802	2164372
Brain Prefrontal Cortex	SRR1759215	10286531	4161928	873	3565	2531822	149451	2736665
Brain Prefrontal Cortex	SRR1759216	10535124	5402694	905	3671	2383743	58327	2661196
Brain Prefrontal Cortex	SRR1759217	10849981	3715492	906	4965	2784255	130458	4132869
Brain Prefrontal Cortex	SRR1759218	12206660	6448014	975	3599	2108732	126614	3477420
Brain Prefrontal Cortex	SRR1759219	14763881	7432057	1027	5822	3140877	175337	3583611
Brain Prefrontal Cortex	SRR1759220	10224351	5048629	916	2648	1905551	88142	3095387
Brain Prefrontal Cortex	ERR409878	23457233	10753661	1007	17079	6548338	839174	4468040
Brain Prefrontal Cortex	ERR409879	17706807	7343306	980	4321	6419259	239367	2704762
Brain Prefrontal Cortex	ERR409882	20121708	8945967	998	9016	5379982	754504	3780296
Brain Prefrontal Cortex	ERR409883	85321866	20556386	1305	18265	12257101	4044783	21748397
Brain Prefrontal Cortex	ERR409887	17001863	4279496	862	9218	6914782	1151571	3477385
Brain Prefrontal Cortex	ERR409888	35988842	7280625	959	6429	23370899	447662	4673147
Brain Prefrontal Cortex	ERR409891	17874597	7578794	943	11832	6042780	595551	3519887
Brain Prefrontal Cortex	ERR409893	21339492	8904086	1021	11135	6821950	499317	4389214
Brain Prefrontal Cortex	ERR409896	17980268	8206097	975	11307	5913927	363632	2962517
Brain Prefrontal Cortex	ERR409898	16888582	4327208	869	11316	8129058	749679	3205417
Brain Prefrontal Cortex	ERR409900	60000000	27315530	1287	30157	14996760	2353933	14255835
Cervix	SRR040010	2532109	1755059	582	0*	79281	22700	634015
Cervix	SRR040012	1682141	1091893	416	0*	38565	3873	517502
Cervix	SRR040014	2079239	1333457	467	0*	39102	18608	652484
Cervix	SRR040018	2227916	1063828	417	0*	42630	26337	1052330
Cervix	SRR040024	2160079	1259539	407	0*	15804	31379	811194
Colon	SRR649562	37373347	24910651	956	14726	7270465	335899	163792
Colon	SRR837819	8665716	2715904	529	0*	155373	22208	2981882
Colon	SRR837824	7329724	3424527	741	0*	973027	80998	2192573
Colon	SRR837827	15278396	4420915	626	0*	515121	48356	4069062
Colon	SRR837830	35208249	20704491	969	0*	1499787	90498	5371987
Colon	SRR837833	37510808	22687519	990	0*	1533536	110562	5370311
Colon	SRR837836	24127527	3710840	571	0*	262041	26168	1278922
Colon	SRR837839	39036337	13978555	973	0*	3888945	184273	5951229
Colon	SRR837842	39686267	19373301	973	0*	3043706	110520	5957421
Epididymis	SRR384894	11801000	8597167	743	13409	2277759	154621	561081
Fat	SRR772343	2491419	1822371	445	616	135608	5676	520419
Fat	SRR772344	2936211	2428512	500	1358	179635	5925	314344
Fat	SRR772345	3485855	2885182	532	1610	213662	7241	370782
Fat	SRR772353	2087702	1706651	487	849	137362	5809	231010
Fat	SRR772354	2113112	1730415	491	874	140111	5869	229901
Fat	SRR772356	1212062	1003025	364	764	74259	2334	129074
Fat	SRR772359	1492939	1162488	413	1475	110131	3521	212277
Fat	SRR772360	1797021	1400656	443	1841	132906	4261	253738
Fat	SRR772362	2354982	2042319	468	1854	119012	4118	184752
Fat	SRR772363	2826015	2452541	483	2170	142648	4879	220185
Fat	SRR772366	3007506	2109845	582	2565	387293	9903	488477
Fat	SRR772367	3476152	2382308	571	3078	488382	17067	566894
Fat	SRR772368	1950237	1481701	427	775	95102	3641	363757
Fat	SRR772369	1829393	1438206	441	1861	126930	4194	221033
Fat	SRR772370	2209708	1738373	461	2310	153159	5215	265702
Heart	ERR038425	13517030	8981019	475	5785	599569	35088	3764382
Heart	ERR038426	13174869	7686836	433	3565	991677	93475	4251227
Heart	ERR038427	9217090	6690226	400	75769	78448	79116	2152957
Heart	SRR553574	25096969	20186924	746	1927	1091293	58042	910183
Kidney	ERR038422	8137447	4818865	314	151441	387564	80806	2493713
Kidney	ERR038423	9223722	5865039	316	198132	168562	191484	2619678
Kidney	ERR038424	9668017	4713385	299	160912	852393	297325	3529701
Kidney	ERR038420	10991174	5856784	373	11952	912095	59828	3860120
Kidney	ERR038421	8850580	5814879	304	239040	323054	67128	2273275
Kidney	SRR553575	25173422	16759390	775	4058	3358125	102312	1776199
Liver	SRR950887	7604561	2334609	481	992	4263913	56446	932234
Liver	SRR950886	5794388	1971453	482	608	2899664	39788	868992
Liver	ERR038410	10514371	3796744	366	219	275546	16513	6362860
Liver	ERR038411	8399589	6103761	425	31097	201297	130475	1855409
Liver	ERR038412	10102401	7114200	413	25244	531152	29551	2189539
Liver	ERR038413	11067688	6798872	452	39364	674285	42202	3262163
Liver	ERR038414	10434406	5033137	368	459	449477	101192	4789059
Lung	SRR372642	33461351	27485690	1047	19464	2502802	218458	1199361
Lung	SRR1608271	3967407	2369573	621	146	715323	56699	204720
Lung	SRR1608272	10334796	8893247	716	136	398649	35750	150240
Lung	SRR1608273	6141028	4930642	691	116	421061	25401	180062
Lung	SRR1608274	9837948	7982300	814	296	495076	52480	248619
Lung	SRR1608275	7894686	6437981	770	239	487625	41807	229335
Lung	SRR1608276	4285177	3405821	670	160	332651	20501	140730
Lung	SRR1608277	7501171	5813801	741	257	643208	35622	236702
Lung	SRR1608278	11308845	9191880	715	119	680703	59811	235981
Lung	SRR1608279	8048748	6682267	709	147	418574	28214	157999
Lung	SRR1608280	9197432	7253388	728	168	735018	38192	233150
Lung	SRR1608281	8830254	6772527	755	177	675111	46922	307635
Lung	SRR1608282	11909716	9533432	791	218	750257	49034	349153
Lung	SRR1608283	9510248	7629138	736	209	720353	35157	239937
Lung	SRR1608284	10878714	8745608	779	252	588566	54701	318807
Lung	SRR1608285	11248869	9117020	784	171	639588	37744	273432
Lung	SRR1216774	7835546	7045570	703	1783	254096	50879	474571
Lung	SRR1216779	8221280	5273026	700	801	311755	62505	2544136
Lung	SRR1216789	11381081	9867185	796	872	340269	38066	1117927
Lung	SRR1216801	11437921	9577515	781	1524	516620	91151	1215695
Lung	SRR1216823	8856219	7738184	771	4011	450349	68644	586352
Lung	SRR1216836	9766130	7445285	732	845	303888	51069	1942897
Lung	SRR1216838	12284208	9155497	765	869	604046	69555	2418681
Lung	SRR1216840	5602567	4576023	654	6219	602683	27960	383877
Lung	SRR372638	13933034	11782330	834	3571	1071375	58598	440666
Lung	SRR372640	35217306	31212029	1020	69390	1919528	125982	692230
Lung	SRR372642	33461351	27485690	1047	19464	2502802	218458	1199040
Lung	SRR372644	47338261	25761207	976	26620	2599970	108291	1448988
Lung	SRR372646	47884789	26265541	983	14293	2239821	129583	1869355
Lung	SRR372648	48631807	26976973	990	11772	1794755	111444	1395437
Lung	SRR372650	53174850	16215388	865	10989	2106661	95188	4116329
Lung	SRR372614	27753666	6224168	677	9616	1532858	59286	2472396
Lung	SRR372616	26802075	11597820	849	10929	2124492	151481	3076021
Lung	SRR372618	35941834	28978406	1086	42135	4274623	254472	1622554
Lung	SRR372620	33275567	28158795	1019	12085	1804148	138135	665102
Lung	SRR372624	25498232	5292039	631	0*	735414	26914	172570
Lung	SRR372626	24862865	2423780	501	99	824209	29375	406020
Lung	SRR372630	26411489	20786841	945	5342	2168310	110134	650003
Lung	SRR372632	29056762	25133134	983	5776	1333194	105705	521245
Lung	SRR372634	26086013	21867537	958	31039	1310420	65414	426132
Lung	SRR372636	31029479	24454714	976	16183	3973884	163644	942190
Pancreas	ERR852089	9886904	1307657	607	6443	6944423	438835	1151232
Pancreas	ERR852091	9025877	2455580	691	5392	5212352	338160	987915
Pancreas	ERR852092	6763260	3175799	776	3375	2800913	158860	600855
Pancreas	ERR852097	11571686	1156954	569	10898	8434677	489713	1435556
Pancreas	ERR852099	15945439	2589228	708	12087	10902420	597193	1786560
Placenta	SRR822452	2791366	2431096	721	2	51451	14439	278460
Placenta	SRR822453	2688296	2392202	722	4	40884	13568	228280
Placenta	SRR822454	6705109	6234778	860	11	79456	30748	329582
Placenta	SRR822455	2287042	1964975	713	1	43423	15068	249733
Placenta	SRR822456	2217730	1890459	689	2	33127	11299	274006
Placenta	SRR822457	4949086	4505883	802	4	58338	22903	338804
Placenta	SRR822458	3644664	3338584	744	32	50276	19375	219161
Placenta	SRR822459	4119447	3734470	776	19	46955	22367	294968
Placenta	SRR567635	17460253	9842046	896	10576	2593346	123554	637337
Placenta	SRR567636	17568841	8224894	862	7768	3183259	141570	696410
Placenta	SRR567637	18925844	9010120	891	10922	2983495	137806	649190
Placenta	SRR567638	17665955	9693804	899	8929	2446578	116010	606093
Placenta	SRR567642	15575577	6512027	853	7210	4199832	122409	706803
Placenta	SRR567643	15414601	4716793	793	5163	3312485	93472	544954
Placenta	SRR567644	13027238	5577544	816	9689	3520288	99461	583998
Placenta	SRR567645	12564792	6673108	841	6477	3103261	83908	424146
Plasma	SRR822437	11628933	10034721	832	57	75452	20681	1099085
Plasma	SRR822438	13359896	4514894	899	14	1704175	114269	6141908
Plasma	SRR822439	4459665	3399518	924	720	95503	20890	701087
Plasma	SRR822443	4975931	2490066	739	13	466221	44076	1717811
Plasma	SRR822444	3734001	999549	722	8	352773	33892	2129337
Plasma	SRR822445	7467008	5159240	813	8	295266	34232	1675019
Plasma	SRR822446	3157506	1344818	722	13	145427	25653	1462082
Plasma	SRR822447	4122156	1562153	783	42	391857	42682	1912935
Plasma	SRR822450	8515191	8063242	805	30	37076	4613	371448
Plasma	SRR822451	2272958	1845423	642	2	16504	3026	399149
Retina	ERR973601	35470443	23772698	945	326541	6727029	589169	2395514
Retina	ERR973602	30207308	18050446	926	218779	6943357	618701	2445515
Retina	ERR973603	38820161	25186435	1017	141426	7746600	245689	3322555
Retina	ERR973604	24852883	18609244	918	225289	2838678	352762	1315830
Retina	ERR973605	28818023	17889000	971	98168	6358665	328153	2482621
Retina	ERR973606	27761855	17651940	893	114086	6511732	189605	1835935
Retina	ERR973607	27438557	16296253	924	132530	6549924	484689	2176455
Retina	ERR973608	29619602	18105167	950	137015	6082677	651783	2374222
Retina	ERR973611	47457813	28223529	1021	264230	11479974	748913	4186494
Retina	ERR973612	37909111	24709207	1006	163100	7949014	533260	2724140
Retina	ERR973613	46574069	28581004	1007	361654	11009888	385808	4201387
Retina	ERR973614	37066117	19977083	937	199073	11022660	722761	3153291
Retina	ERR973615	39976532	26681139	992	281818	7600514	589356	2581720
Retina	ERR973616	25455497	15479056	884	129793	6002136	140560	2521609
Retina	ERR973617	28517167	19979654	907	100391	4658833	204380	2500097
Retina	ERR973618	36739708	19860465	947	240854	9762100	688494	3578217
RPE/Choroid	ERR973609	28954136	17322185	876	9262	4428159	1680954	2530115
RPE/Choroid	ERR973610	23667762	13381936	809	5236	5528871	546034	1915478
Skeletal Muscle	SRR1820680	6311060	4613154	494	1199	877575	37656	264030
Skin	SRR2174542	4711212	3213824	686	58	630321	41680	782180
Skin	SRR2174541	6167516	4039083	721	92	517154	76246	1478417
Skin	SRR1259226	3323023	1108220	478	27	520603	47531	1178991
Skin	SRR1259228	4704964	1755788	510	3	627479	54735	1920511
Skin	SRR1259230	5091694	1736405	502	3	452789	46169	2457045
Skin	SRR1259236	5431915	3277603	773	27	706624	81762	913327
Skin	SRR2174509	10119442	6346060	784	39	1459754	120336	2075684
Skin	SRR2174513	15206266	9602901	867	219	3135656	139597	2180049
Skin	SRR2174517	14758615	7898108	822	398	3071411	171372	3415023
Skin	SRR2174521	4031246	2279741	596	102	762031	45768	869731
Skin	SRR2174525	6865132	4013564	745	1266	969316	98956	1646122
Skin	SRR2174529	9721436	7154146	818	66	901072	83249	1485170
Skin	SRR2174533	7882343	5355321	723	165	1006461	65913	1377270
Skin Dermis	SRR1259222	9278224	1890271	643	5	1635068	114617	4109989
Skin Dermis	SRR1259224	3189975	998604	552	9	745164	58508	1078971
Skin Dermis	SRR1259216	4282174	1207802	539	3	794618	55434	1776988
Skin Dermis	SRR1259218	5617907	2237061	625	5	923348	80282	1843947
Skin Dermis	SRR1259220	11713003	2044599	620	4	1885821	103628	6383509
Skin Epidermis	SRR1259212	6544700	1048789	377	18	2132245	110245	2745008
Testes	SRR333676	11556383	1450289	664	56116	7482645	466226	1496179
Testes	SRR333678	23633009	18192837	771	234	1529343	78018	2616225
Testes	SRR333680	24610661	19562017	1272	908	2136555	317680	2117734
Testes	SRR333682	19695930	9506917	1126	1476	7102716	152813	2577448
Testes	SRR333684	15022021	1491396	680	462	4240544	201170	6931865
Testes	SRR333686	20557291	5582366	713	15031	447812	4421030	9926014
Testes	SRR333688	14632407	1181532	680	577	1253362	851063	10341167
Testes	ERR038415	7130991	1158748	509	8918	200178	1422802	4096596
Testes	ERR038416	9378202	2011952	540	13208	343193	1372092	5413642
Testes	ERR038417	10304874	2282102	597	14687	447050	1193956	6133101
Testes	ERR038419	11139216	1161674	476	11688	204109	1515855	7997547
Testes	SRR553576	24285403	3890541	805	5445	2635000	2022174	7888319
Thyroid	SRR1658401	5328055	1600600	555	1676	2686656	155195	744273
Thyroid	SRR1658402	5577709	3021129	654	3558	1911398	96029	439343
Thyroid	SRR1658403	3262206	1376063	559	1372	1398099	74302	335679
Thyroid	SRR1658404	3205951	1206643	509	1560	1455535	72227	373005
Thyroid	SRR1658405	5910821	3615569	626	1800	1622584	120542	442504
Thyroid	SRR1658406	7070771	2892665	631	3553	3054693	122035	684422
Thyroid	SRR1658407	5227479	1962916	564	2271	2415295	83207	607702
Thyroid	SRR1658408	6195630	3018777	617	2114	2417681	59109	548779
Thyroid	SRR1291267	31305708	30060284	806	2555	519400	108941	593646
Thyroid	SRR1291268	28820728	27635710	762	2317	529141	85532	544798
Thyroid	SRR1291269	31708974	30564660	775	1869	460474	109824	550283
Uterus	SRR1556139	14584595	7499293	697	12291	5440955	230831	1380889
Uterus	SRR1556141	10571133	8428768	666	4596	1470065	93371	544435
Uterus	SRR1556143	12426115	9839516	708	3898	1869732	102200	599739
* = No hairpin reads due to alignment method				AVERAGE
		3976537372	2367360331	693.368	5354741	603267952	56104170	515559855
				721
				MEDIAN
