# Supplementary material for: Toward the human cellular microRNAome
Source: HighWire-hosted journal article supplement (doi:10.1101/gr.222067.117), 2017-09-06
Supplement: Supplemental_Table_S5.xlsx [file Supplemental_Table_S5.xlsx]

## Sheet: ALL RPM data
miRNA	Skeletal muscle SRR1820680	Bladder Epithelium DRR013035	Bladder Epithelium DRR013036	Bladder Epithelium DRR013037	Bladder Epithelium DRR013038	Colon SRR649562	Liver SRR950887	Liver SRR950886	Lung SRR372642	Blood SRR2201546	Blood SRR2201547	Blood SRR2201548	Blood SRR2201549	Blood SRR2201550	Blood SRR2201551	Blood SRR2201572	Blood SRR2201573	Pancreas ERR852089	Pancreas ERR852091	Pancreas ERR852092	Pancreas ERR852097	Pancreas ERR852099	Skin SRR2174542	Skin SRR2174541	Blood SRR2061740	Blood SRR2061741	Blood SRR2061742	Blood SRR2061743	Blood SRR2061744	Blood SRR2061745	Blood SRR2061746	Blood SRR2061747	Blood SRR2061748	Blood SRR2061749	Thyroid SRR1658401	Thyroid SRR1658402	Thyroid SRR1658403	Thyroid SRR1658404	Thyroid SRR1658405	Thyroid SRR1658406	Thyroid SRR1658407	Thyroid SRR1658408	Blood SRR1949839	Blood SRR1949840	Blood SRR1949841	Blood SRR1949842	Blood SRR1949843	Blood SRR1949844	Blood SRR1949845
hsa-let-7a-2-3p	0	0.462261	0.24472	0	0	0.9233	0	0	1.27339	0	0	0	0	0	0	0	0	2.29418	0	3.77858	0	3.86216	6.53427	11.6363	0	0	0	0	0	0	0	0	0	0	6.25929	2.98464	2.91248	4.15533	3.05086	5.5433	1.02164	2.32286	0	0	0	0	0	0	0
hsa-let-7a-3p	111.204	172.886	149.096	169.122	160.89	67.3607	70.2473	60.8688	294.444	4.34241	4.03266	5.70582	5.48176	8.58615	5.14755	5.48451	2.75692	159.063	147.419	156.181	122.736	126.292	318.001	252.533	1.26137	0.797309	1.61216	1.19966	0.721766	0.615013	0.790957	0.73806	0	0	152.727	137.625	153.633	160.396	222.99	141.354	153.757	149.658	0	0	0	0	0	0	0
hsa-let-7a-5p/7c-5p	5458.3	251044	256293	268899	264559	12266.8	38410.7	37503.8	56472.7	1824.95	1902.84	2059.57	1929.9	578.024	1393.13	781.792	1271.08	16929.5	22213.9	25174.8	18363.7	20708.1	80411.1	73516.2	760.262	784.096	787.137	408.397	484.511	669.925	679.432	663.368	635.68	616.283	54495.3	58793.4	49606	42755.9	62201.7	52622.2	45677	62321.2	2971.24	738.018	9578.3	2853.9	4182.81	3914.29	2836.05
hsa-let-7b-3p	41.1866	372.979	369.466	378.268	363.242	145.239	190.182	191.737	362.989	33.2289	30.341	35.8325	31.117	28.0701	34.031	49.8592	46.3163	180.475	189.365	373.134	216.949	270.351	1071	984.877	6.30685	7.28968	5.10517	3.59897	4.3306	5.18368	5.88824	4.28075	5.37608	4.80902	253.501	190.685	284.695	272.59	292.328	278.551	230.891	277.415	0	0	29.5708	0	0	14.4676	0
hsa-let-7b-5p	1788.36	134686	157339	131752	167047	2892.18	2498.49	2526.06	7292.23	359.098	236.967	459.889	236.683	60.3232	155.428	253.285	569.167	14031.2	12773.8	13226.6	15482.9	16235.3	50406	57021.9	67.6553	73.5802	72.5472	34.79	38.1505	54.1211	57.3883	51.0737	47.4072	44.447	6177.29	8892.24	6620.06	7103.96	6095.89	6017.6	6965.03	7268.88	2880.15	1023.41	5923.9	3548.42	3130.82	4584.97	5479.77
hsa-let-7c-3p	0	0	0.36708	0	0	1.68603	1.71335	2.5362	1.81913	0	0	0	0	0	0	0	0	0	4.07236	4.72322	3.45735	1.15865	11.8239	12.6266	0	0	0	0	0	0	0	0	0	0	4.3815	9.61718	12.378	10.8039	6.65641	6.58267	9.19476	7.96408	0	0	0	0	0	0	0
hsa-let-7d-3p	150.223	40.679	56.102	43.9456	41.0951	71.6561	62.5372	59.3471	126.393	154.061	101.585	128.952	81.259	123.839	185.169	206.916	92.357	29.0596	25.2486	28.6542	47.5386	31.2835	173.936	358.745	27.9795	30.2977	24.8541	15.7669	19.6939	22.404	23.1135	20.2228	21.993	20.2562	240.357	244.741	297.073	399.743	285.671	319.086	287.081	245.891	8.88546	5.14217	58.6505	28.8558	50.4772	18.2567	48.5427
hsa-let-7d-5p	560.571	4940.51	4741.94	4778.49	4761.71	607.29	477.596	435.212	1915.69	288.298	287.855	370.422	310.042	93.7872	271.39	177	272.66	1131.03	1625.28	2233.77	1283.54	1500.45	4489.04	4581.24	49.0787	48.1802	44.2	21.5081	25.3649	39.888	37.6144	32.1794	33.071	30.6028	1893.44	2123.41	1762.05	1783.47	2421.27	1963.72	1708.69	2139.35	155.899	35.9952	510.76	141.167	191.195	190.835	290.433
hsa-let-7e-3p	2.81803	6.80184	7.89222	8.83891	6.43068	10.0359	0	2.02896	10.4054	0	0	0	0	0	0	0	0.413539	14.5298	10.5881	21.0971	15.5581	18.9246	9.02352	24.2629	0	0	0	0	0	0	0	0	0	0	18.1519	21.2241	16.7467	24.1009	19.1372	26.3307	25.541	12.6098	0	0	0	0	0	0	0
hsa-let-7e-5p	102.966	19548.2	20705.8	18322.5	22581.6	896.283	465.603	472.748	1597.16	1.3216	0	0	1.77351	0.550394	1.1439	1.99437	3.72185	237.83	213.799	426.035	318.941	413.637	2855.48	3330.21	0	0	0	0.428449	0.412438	0	0	0	0	0	1678.12	1769.56	1565.46	1559.91	2623.74	1833.79	1598.87	2193.44	6.5519	1.40241	15.1293	12.7305	11.9497	5.97076	6.47922
hsa-let-7f-1-3p	9.32117	37.3771	32.4254	36.2271	31.3572	10.3169	17.5618	17.2462	26.7048	2.07681	1.72828	3.87996	1.61228	2.64189	4.43262	3.98873	2.48123	22.9418	22.8052	22.6715	32.8449	23.1729	42.6283	0	0.34401	0.455605	0.940426	0	0.515547	0	0.790957	0	1.14038	0	23.7853	24.2088	16.0186	24.1009	31.3406	26.6772	25.0302	22.8967	0	0	0	0	0	0	0
hsa-let-7f-2-3p	0	0	0	0	0	9.75486	0	14.71	6.91269	0	0	0	0	0.330237	0	0	0	25.236	14.6605	20.4673	21.6085	14.29	0	4.95162	0	0	0	0	0	0	0	0	0	0	30.0446	25.5353	34.2216	35.7359	41.6026	36.0315	34.225	34.8428	0	0	0	0	0	0	0
hsa-let-7f-5p	11221.8	185683	164849	190817	180030	10529.7	17229.4	16692.8	63878.6	1281.77	1106.29	1238.39	1195.35	292.259	948.58	261.262	592.877	14263.7	14766	11832.9	14024.8	14120	17447.1	15666.9	620.594	632.608	568.555	378.834	448.32	611.586	620.901	613.918	607.171	583.64	36135.5	32757.1	32204.7	29646.6	51018.6	29540.6	32779.3	36649.7	950.654	75.7302	2423.93	364.658	1042.51	884.361	765.473
hsa-let-7g-3p	0	0.660373	0	0	0	20.8746	6.8534	6.59412	24.8857	0	0	0	0	0	0	0	0	30.5891	21.9907	34.3221	24.2015	24.3316	13.3797	12.6266	0	0	0	0	0	0	0	0	0	0	25.6631	34.4892	33.4935	47.3708	23.8521	35.3386	36.7791	14.9326	0	0	0	0	0	0	0
hsa-let-7g-5p	5019.78	15748.2	15716.3	16237.5	13000	3816.88	5115.2	5107.4	9824.31	1194.92	1048.3	1182.93	1261.93	329.246	1074.41	272.73	545.044	9950.62	13370.8	12087.4	10781.8	11434.3	5558.49	8073.12	201.934	198.416	197.893	106.941	126.722	174.488	181.129	172.558	167.799	150.683	10111.3	9231.16	8419.97	7905.11	11687	9101.76	8948.55	9836.96	1391.52	114.647	1471.17	528.457	758.189	1369.6	508.567
hsa-let-7i-3p	11.0553	1.32075	1.71304	1.05818	0	17.623	13.7068	16.2317	67.1622	22.4673	15.1705	16.4328	16.4453	7.92568	17.5875	9.47324	8.68431	74.1785	67.6011	167.202	82.9765	86.1261	425.661	144.092	8.71492	11.2762	11.8225	3.17052	3.81505	7.46801	7.64592	9.15194	9.28595	6.70348	289.805	232.802	291.248	371.487	244.346	261.575	290.657	256.51	1.88479	0.350603	6.7787	5.658	5.5628	4.01878	3.59956
hsa-let-7i-5p	2913.41	3726.75	6134.27	4850.51	5137.2	4339.27	1613.97	1606.43	3000.54	1004.23	723.575	977.749	604.767	114.922	339.453	332.062	631.749	3334.21	5254.56	7003.59	3708.88	3958.32	6359.71	9415.26	599.609	616.661	618.666	416.367	473.169	608.248	607.191	615.099	599.351	584.806	14085.9	13285.6	17253.5	16964.6	16901.5	14009	16382	14257.4	4906.75	770.508	2558.22	1078.7	1541.72	6070.89	967.563
hsa-miR-100-3p	0	0.396224	0.18354	0.497967	0	4.65664	7.28173	6.59412	5.05718	0	0	0	0	0	0	0	0	0	1.22171	3.14881	3.45735	2.31729	8.40121	4.20888	0	0	0	0	0	0	0	0	0	0	31.2965	32.1678	36.4059	20.7767	34.9462	17.3228	19.922	15.9282	0	0	0	0	0	0	0
hsa-miR-100-5p	371.98	1022.26	1226.05	1337.1	1119.49	716.722	12234.6	13166.9	4084.6	1117.89	1228.04	21.6821	35.309	527.828	1722.86	9.97183	2320.78	2343.12	2382.33	7998.3	1314.66	2745.61	6763.28	7486.6	54.4682	61.3928	61.9338	21.5938	26.9116	36.11	44.3815	42.3646	40.8908	41.9696	11845.7	13118.8	12200.4	10448.2	9134.82	12099.6	11156.8	10654.9	4.21835	0.93494	25.8377	18.6714	18.5427	0	4.52517
hsa-miR-101-3p	5510.98	7375.11	6099.15	6774.9	4782.35	2309.86	3085.74	3002.86	37680.6	480.875	296.497	406.254	212.499	51.2968	186.742	26.924	41.4917	13729.1	13696.6	11667.6	10164.6	15984.3	2742.53	2978.89	43.8039	41.574	45.0061	29.3916	33.3043	38.0429	43.0632	37.641	40.402	40.3666	14805.1	10916.8	11574.9	12554.9	13768.2	12655.7	11680.4	9511.43	36.2599	30.6193	135.378	120.233	153.904	218.048	49.5711
hsa-miR-101-5p	0	24.764	18.1705	18.985	0	14.9735	12.4218	10.1448	97.4325	0	0	0	0.322456	0	0	0	0	38.2363	40.7236	61.4019	33.7092	59.091	91.1687	75.7598	0	0	0	0	0	0.263577	0	0	0	0	50.0743	44.1064	41.5028	47.3708	42.4346	53.7008	49.0387	28.2061	0	0	0	0	0	0	0
hsa-miR-103a-2-5p	13.8734	2.04716	3.6708	2.17861	2.20481	5.98138	0	0	7.3129	21.9009	14.4024	24.8774	22.0883	16.2917	22.735	18.9465	21.2283	23.7065	7.73748	22.0417	33.7092	19.3108	14.6243	19.3113	0.22934	0.227803	0	0.257069	0	0.439295	0	0	0.488734	0.437183	31.9224	18.9027	14.5624	0	20.8013	8.31496	23.4977	7.63224	0	0	0	0	0	0	0
hsa-miR-105-3p	0	0	0	0	0	0	0	0	0	0	0	0	0	0	0	0	0	0	0	0	0	0	0	0	0	0	0	0	0	0	0	0	0	0	0	0	0	0	0	0	0	0	0	0	0	0	0	0	0
hsa-miR-105-5p	0	0	0	0	0	2.08746	0	0	0.582121	0	0	0	0	0	0	0	0	0	0	0	0	0	2.48925	0	0	0	0	0	0	0	0	0	0	0	0	0	0	0	0	0	0	0	0	0	0	0	0	0	0
hsa-miR-106a-3p	4.11866	1.38678	0	0	0	1.2043	0	0	0.764034	3.77601	2.11235	3.19526	1.77351	0.880631	2.43079	0	0	3.05891	1.22171	1.88929	0	4.24837	2.48925	0	0	0	0	0	0	0	0	0	0	0	0	0	0	0	0	2.4252	0	0	0	0	0	0	0	0	0
hsa-miR-106b-3p	63.2973	33.0186	49.0052	34.7332	38.4004	153.308	52.6855	48.695	26.7776	1076.16	857.421	829.398	820.813	357.866	806.879	473.164	695.158	9.17672	23.6197	21.7268	12.1007	16.9935	211.586	217.376	306.398	313.456	309.535	190.66	222.82	314.447	325.347	320.023	311.975	317.395	199.671	360.81	447.793	325.778	203.021	415.401	314.154	226.644	499.201	153.915	613.128	263.663	309.662	677.566	524.611
hsa-miR-106b-5p	41.8369	108.235	108.839	162.462	89.9683	122.076	39.407	44.6371	1666.36	562.059	330.294	405.798	318.103	79.477	213.052	103.707	121.994	1996.7	2158.35	2431.51	2026.01	2292.58	1019.35	1100.5	11.6963	14.0099	11.5538	5.14139	6.39279	9.48877	8.52476	8.11866	10.2634	9.76376	163.367	204.614	298.529	173.693	151.156	299.685	195.644	141.362	3.50033	0.584338	21.515	7.6383	8.03515	6.08558	12.0328
hsa-miR-107/103a-3p/103b	716.213	14811.2	17309.3	13903.6	16100.3	2554.89	2187.52	2231.35	10608.8	2014.88	1386.85	1295.91	2082.75	609.837	1376.97	1419.99	1888.08	2795.08	3981.14	6206.63	3067.54	4024.37	14264	8835.67	518.652	495.584	558.748	225.621	280.355	422.514	437.487	415.38	395.386	418.967	3842.58	4593.36	6001.16	4644	4842.82	4899.59	5412.65	4700.8	402.897	104.713	2019.56	872.181	979.052	823.85	616.862
hsa-miR-10a-3p	6.0696	1.0566	1.71304	1.74288	1.04116	34.965	8.99508	7.10136	11.0603	0.566401	0	0	0	0	0	0	0	40.5305	43.5742	75.2567	35.4379	60.6358	13.0685	38.1275	0	0	0	0	0	0	0	0	0	0	9.38894	2.98464	4.36871	3.32427	4.71496	4.50393	6.64066	8.95959	0	0	0	0	0	0	0
hsa-miR-10a-5p	867.953	518.591	700.205	611.005	669.465	41458.9	46085.2	43349.2	6714.51	70.2338	85.4541	116.399	150.265	168.09	133.407	190.462	277.347	2311	2927.62	3793.69	2008.72	3143.79	2515.38	4242.05	103.432	96.8161	103.984	56.9837	66.1963	83.466	94.827	78.6772	74.1247	77.5272	13235.3	9899.06	8667.53	12339.7	10971.2	13869	16217	19174.8	1.16678	0.584338	9.13651	5.658	8.03515	0.803756	0.822757
hsa-miR-10b-3p	6.28637	0.792447	1.04006	1.24492	0.79618	2.97062	0	0	0.800417	0	0	0	0	0	0	0	0	10.7062	7.73748	9.44644	11.2364	10.4278	35.1606	51.4968	0	0	0	0	0	0	0	0	0	0	3.12965	3.64789	5.09683	4.9864	6.65641	3.81102	7.6623	6.63673	0	0	0	0	0	0	0
hsa-miR-10b-5p	1804.62	251.734	378.092	497.407	321.167	20121.1	3930.85	3599.38	455.692	3.77601	5.56892	7.30345	6.44913	3.85276	4.71859	2.49296	5.65169	1378.04	1799.17	1997.92	1169.45	1860.79	3652.66	6137.78	7.79756	8.31479	6.0456	5.22708	6.90833	6.50156	5.97612	7.08537	4.72443	8.01503	43254.8	42957.9	21956.4	47462.2	37878	29525.7	60891.8	45050.5	0	0	0.196484	0.8487	0	0	0
hsa-miR-1178-3p	0	0	0	0	0	0	0	0	0	0	0	0	0	0	0	0	0	0	0	0	0	0	0	0	0	0	0	0	0	0	0	0	0	0	0	0	0	0	0	0	0	0	0	0	0	0	0	0	0
hsa-miR-1178-5p	0	0	0	0	0	0	0	0	0	0	0	0	0	0	0	0	0	0	0	0	0	0	0	0	0	0	0	0	0	0	0	0	0	0	0	0	0	0	0	0	0	0	0	0	0	0	0	0	0
hsa-miR-1179	0	0.660373	0.48944	0.622459	0.183734	0.963443	0	1.01448	0.982329	0	0	0	0.483685	0	0	0	0	19.1182	22.398	23.3012	31.9805	33.987	6.22312	0	0	0	0	0	0	0	0	0	0	0	97.6449	80.9169	25.4842	49.864	129.523	62.3622	61.8092	43.8024	0	0	0	0	0	0	0
hsa-miR-1180-3p	10.1883	2.44338	1.5295	1.05818	1.59236	10.1563	10.2801	5.57964	3.1289	43.0465	34.3737	61.6228	27.8925	35.5555	27.5966	68.3071	55.8277	32.1185	41.538	89.1114	51.8603	40.9388	37.6499	39.8605	7.45355	11.504	8.32949	4.11311	5.87724	7.02872	8.26111	6.05209	7.49393	6.70348	77.6152	62.3458	68.4432	70.6407	84.8693	65.1338	66.9174	71.3449	23.5151	4.3241	51.4788	26.5926	30.0803	29.8538	40.5208
hsa-miR-1180-5p	0	0	0	0	0	0	0	0	0	0	0	0	0	0	0	0	0	0	0	0	0	1.54486	0	0	0	0	0	0	0	0	0	0	0	0	0	0	0	0	0	1.03937	0	0	0	0	0	0	0	0	0
hsa-miR-1181	0	0	0	0	0	0	0	0	0	0	0	0	0	0	0	0	0	0	0	0	0	0	0	0	0	0	0	0	0	0	0	0	0	0	0	0	0	0	0	0	0	0	0	0	0	0	0	0	0
hsa-miR-1182	0	0	0	0	0	0	0	0	0	0	0	0	0	0	0	0	0	0	0	0	0	0	0	0	0	0	0	0	0	0	0	0	0	0	0	0	0	0	0	0	0	0	0	0	0	0	0	0	0
hsa-miR-1183	0	0	0	0	0	0	0	0	0	0	0	0	0	0	0	0	0	0	0	0	0	0	0	0	0	0	0	0	0	0	0	0	0	0	0	0	0	0	0	0	0	0	0	0	0	0	0	0	0
hsa-miR-1184	0	0	0	0	0	0	0	0	0	0	0	0	0	0	0	0	0	0	0	0	0	0	0	0	0	0	0	0	0	0	0	0	0	0	0	0	0	0	0	0	0	0	0	0	0	0	0	0	0
hsa-miR-1185-1-3p	0.867086	0.264149	0.55062	0.497967	0.612446	1.40502	1.28501	1.01448	0.363826	0	0	0	0	0	0	0	0	15.2945	14.6605	28.3393	9.50772	21.6281	31.1156	61.4001	0	0	0	0	0	0	0	0	0	0	0	0	0	0	0	1.03937	0	0	0	0	0	0	0	0	0
hsa-miR-1185-2-3p	0	0.198112	0.12236	0.435721	0.183734	0.642296	0	0	0	0	0	0	0	0	0	0	0.275692	0	2.03618	3.77858	0	1.15865	8.40121	11.8839	0	0	0	0	0	0	0	0	0	0	0	0	0	0	0	0	0	0	0	0	0	0	0	0	0
hsa-miR-1185-5p	0	1.91508	1.46832	1.43165	1.28614	1.52545	0	1.01448	1.4553	0	0	0	0	0	0	0	0	17.5887	6.10854	10.706	6.91471	12.3589	13.6909	10.3984	0	0	0	0	0	0	0	0	0	0	0	0.663254	0	0	2.2188	4.50393	0	1.99102	0	0	0	0	0	0	0
hsa-miR-1193	0	0.594335	0.36708	0.248983	0.367468	0	0	0	0	0	0	0	0	0	0	0	0	0	0	0	0	0	1.86693	0	0	0	0	0	0	0	0	0	0	0	0	0	0	0	0	0	0	0	0	0	0	0	0	0	0
hsa-miR-1197	0	0	0	0	0	0.883156	0	0	0	0	0	0	0	0	0	0	0	2.29418	1.22171	2.20417	0	3.08972	0	0	0	0	0	0	0	0	0	0	0	0	0	0	0	0	0	1.03937	0	0	0	0	0	0	0	0	0
hsa-miR-1199-3p	0	0	0	0	0	0	0	0	0	0	0	0	0	0	0	0	0	0	0	0	0	0	0	0	0	0	0	0	0	0	0	0	0	0	0	0	0	0	0	0	0	0	0	0	0	0	0	0	0
hsa-miR-1199-5p	0	0	0	0	0	0	0	0	0	0	0	0	0	0	0	0	0	0	0	0	0	0	0	0	0	0	0	0	0	0	0	0	0	0	0	0	0	0	0	0	0	0	0	0	0	0	0	0	0
hsa-miR-1200	0	0	0	0	0	0	0	0	0	0	0	0	0	0	0	0	0	0	0	0	0	0	0	0	0	0	0	0	0	0	0	0	0	0	0	0	0	0	0	0	0	0	0	0	0	0	0	0	0
hsa-miR-1202	0	0	0	0	0	0	0	0	0	0	0	0	0	0	0	0	0	0	0	0	0	0	0	0	0	0	0	0	0	0	0	0	0	0	0	0	0	0	0	0	0	0	0	0	0	0	0	0	0
hsa-miR-1203	0	0	0	0	0	0	0	0	0	0	0	0	0	0	0	0	0	0	0	0	0	0	0	0	0	0	0	0	0	0	0	0	0	0	0	0	0	0	0	0	0	0	0	0	0	0	0	0	0
hsa-miR-1204	0	0	0	0	0	0	0	0	0	0	0	0	0	0	0	0	0	0	0	0	0	0	0	0	0	0	0	0	0	0	0	0	0	0	0	0	0	0	0	0	0	0	0	0	0	0	0	0	0
hsa-miR-1205	0	0	0	0	0	0	0	0	0	0	0	0	0	0	0	0	0	0	0	0	0	0	0	0	0	0	0	0	0	0	0	0	0	0	0	0	0	0	0	0	0	0	0	0	0	0	0	0	0
hsa-miR-1206	0	0	0	0	0	0	0	0	0	0	0	0	0	0	0	0	0	0	0	0	0	0	0	0	0	0	0	0	0	0	0	0	0	0	0	0	0	0	0	0	0	0	0	0	0	0	0	0	0
hsa-miR-1207-3p	0	0	0	0	0	0	0	0	0	0	0	0	0	0	0	0	0	0	0	0	0	0	0	0	0	0	0	0	0	0	0	0	0	0	0	0	0	0	0	0	0	0	0	0	0	0	0	0	0
hsa-miR-1207-5p	0	0	0	0	0	0	0	0	0	0	0	0	0	0	0	0	0	0	0	0	0	0	0	0	0	0	0	0	0	0	0	0	0	0	0	0	0	0	0	0	0	0	0	0	0	0	0	0	0
hsa-miR-1208	0	0	0	0	0	0	0	0	0	0	0	0	0	0	0	0	0	0	0	0	0	0	0	0	0	0	0	0	0	0	0	0	0	0	0	0	0	0	0	0	0	0	0	0	0	0	0	0	0
hsa-miR-122-3p	0	0	0	0	0	0	443.757	452.965	0	0	0	0	0	0	0	0	0	0	0	0	0	0	0	0	0	0	0	0	0	0	0	0	0	0	0	0	0	0	0	0	0	0	0	0	0	0	0	0	0
hsa-miR-1224-3p	0	0	0	0	0	0.883156	0	0	0	3.58721	0	0	0	0	0	0	0	0	0	3.4637	0	0	0	0	0	0	0	0	0	0	0	0	0	0	0	0	0	0	0	0	0	0	0	0	0	0	0	0	0
hsa-miR-1224-5p	0	1.45282	2.50838	1.30716	2.20481	7.78783	0	0	1.27339	0	0	0	0	0	0	0	0	12.2356	8.55195	19.5226	25.0658	17.7659	0	0	0	0	0	0	0	0	0	0	0	0	0	2.32139	0	0	0	0	0	1.99102	0.897521	0	0.98242	0	0	3.32985	4.01094
hsa-miR-1225-3p	0	0	0	0	0	0	0	0	0	0	0	0	0	0	0	0	0	0	0	0	0	0	0	0	0	0	0	0	0	0	0	0	0	0	0	0	0	0	0	0	0	0	0	0	0	0	0	0	0
hsa-miR-1225-5p	0	0	0	0	0	0	0	0	0.291061	0	0	0	0	0	0	0	0	0	0	0	0	0	0	0	0	0	0	0	0	0	0	0	0	0	0	0	0	0	0	0	0	0	0	0	0	0	0	0	0
hsa-miR-122-5p	1.30063	3.56601	13.0925	16.3707	13.9638	0.281004	109304	135488	0	0	0	0	0.806141	0	0	0	1.792	1.52945	4.07236	2.20417	0	0	0	0	0	0	0	0	0	0	0	0	0	0	0	0	0	0	0	0	0	0	0	0	0	0.5658	0	0	0
hsa-miR-1226-3p	3.90189	0	0	0	0	1.96703	0	0	0.727651	8.87362	10.5617	10.4987	4.99807	10.0172	9.29419	23.4338	12.9575	0	0	1.57441	0	0	0	4.95162	1.37604	2.05022	1.47781	1.7138	1.44353	1.40574	1.05461	2.06657	1.14038	1.16582	0	0.99488	0	0	2.49616	3.46457	5.61902	1.32735	0.448761	0.233735	1.37539	0	1.64824	1.60751	1.13129
hsa-miR-1226-5p	0	0	0	0	0	0	0	0	0	0	0	0	0	0	0	0	0	0	0	0	0	0	0	0	0	0	0	0	0	0	0	0	0	0	0	0	0	0	0	0	0	0	0	0	0	0	0	0	0
hsa-miR-1227-3p	0	0	0	0	0	0	0	0	0	6.23042	0	0	3.06334	0	0	0	0	0	0	0	0	0	0	0	0	0	0	0	0	0	0	0	0	0	0	1.65813	0	0	1.94145	0	4.59738	2.98653	0	0	0	0	0	0	2.57112
hsa-miR-1227-5p	0	0	0	0	0	0	0	0	0	0	0	0	0	0	0	0	0	0	0	0	0	0	0	0	0	0	0	0	0	0	0	0	0	0	0	0	0	0	0	0	0	0	0	0	0	0	0	0	0
hsa-miR-1228-3p	0	0	0	0	0	0	0	0	0.618504	0	0	0	0	0	0	0	0.689231	0	2.03618	4.09346	1.72868	0	0	0	0	0	0	0	0	0	0	0	0	0	0	0	0	0	0	0	0	0	0	0	0	0	0	0	0
hsa-miR-1228-5p	0	0	0.3059	0	0.244978	0	0	0	0.14553	0	0	0	0	0	0	0	0	0	0	0	0	0	0	0	0	0	0	0	0	0	0	0	0	0	0	0	0	0	0	0	0	0	0	0	0	0	0	0	0
hsa-miR-1229-3p	0	0	0	0.124492	0	0.602152	0	0	0.509356	6.98562	6.52907	7.07522	3.22456	3.08221	5.86249	6.48169	6.06523	0	0	0	0	0	0	0	1.83472	0.455605	1.61216	0.599828	0.824876	1.58146	0.703073	1.1809	0.814557	0	0	0	0	0	1.1094	0	0	0.99551	0.628265	0	0.785936	1.9803	0	2.29645	1.13129
hsa-miR-1229-5p	0	0	0	0	0	0	0	0	0	0	0	0	0	0	0	0	0	0	0	0	0	0	0	0	0	0	0	0	0	0	0	0	0	0	0	0	0	0	0	0	0	0	0	0	0	0	0	0	0
hsa-miR-1231	0	0	0	0	0	0	0	0	0	0	0	0	0	0	0	0	0	0	0	0	0	0	0	0	0	0	0	0	0	0	0	0	0	0	0	0	0	0	0	0	0	0	0	0	0	0	0	0	0
hsa-miR-1233-3p	0	0	0	0	0	0	0	0	0	0	0	0	0	0	1.28689	0	0	0	0	0	0	0	0	0	0	0	0.40304	0	0	0	0.263652	0	0	0	0	3.97952	8.73743	0	3.88291	0	0	0	0	0	0.196484	0	0	0	0.411379
hsa-miR-1233-5p	0	0	0	0	0	0	0	0	0	0	0	0	0	0	0	0	0	0	0	0	0	0	0	0	0	0	0	0	0	0	0	0	0	0	0	0	0	0	0	0	0	0	0	0	0	0	0	0	0
hsa-miR-1234-3p	0	0	0	0	0	2.7699	0	0	0	1.3216	2.49641	2.96703	1.28983	1.43103	1.00091	1.99437	1.51631	0	0	0	0	0	0	0	0	0.227803	0	0	0	0	0	0.295224	0	0.291456	0	0	0	0	0	0	1.53246	0	0	0	0.196484	0	0.824118	0	0.308534
hsa-miR-1236-3p	0	0	0	0	0	0	0	0	0	0	0	0	0	0	0	0	0	0	0	0	0	0	0	0	0	0	0	0	0	0	0	0	0	0	0	0	0	0	0	0	0	0	0	0	0	0	0	0	0
hsa-miR-1236-5p	0	0	0	0	0	0	0	0	0	0	0	0	0	0	0	0	0	0	0	0	0	0	0	0	0	0	0	0	0	0	0	0	0	0	0	0	0	0	0	0	0	0	0	0	0	0	0	0	0
hsa-miR-1237-3p	0	0	0	0	0	0	0	0	0	0	0	0	0	0	0	0	0	0	0	0	0	0	2.8004	0	0	0	0	0	0	0	0	0	0	0	3.12965	0	0	0	0	1.73228	0	0	0	0	0	0	0	0	0
hsa-miR-1237-5p	0	0	0	0	0	0	0	0	0	0	0	0	0	0	0	0	0	0	0	0	0	0	0	0	0	0	0	0	0	0	0	0	0	0	0	0	0	0	0	0	0	0	0	0	0	0	0	0	0
hsa-miR-1238-3p	0	0	0	0	0	0	0	0	0	0	0	0	0	0.220158	0	0	0	0	0	0	0	0	0	0	0	0.227803	0	0	0	0.351436	0	0	0	0	0	0	0	0	0	0	0	0	0	0	0.392968	0	0	0	0.514223
hsa-miR-1238-5p	0	0	0	0	0	0	0	0	0	0	0	0	0	0	0	0	0	0	0	0	0	0	0	0	0	0	0	0	0	0	0	0	0	0	0	0	0	0	0	0	0	0	0	0	0	0	0	0	0
hsa-miR-1243	0	0	0	0	0	0.802869	0	0	0	0	0	0	0	0	0	0	0	0	0	0	0	0	0	0	0	0	0	0	0	0	0	0	0	0	0	0	0	0	0	0	0	0	0	0	0	0	0	0	0
hsa-miR-124-3p	0	1.18867	0.97888	0.435721	0.612446	1.76631	0	0	0.400208	0	0	0	0	0	0	0	0	2.29418	2.03618	3.4637	0	1.54486	5.28965	3.71371	0	0	0	0	0	0	0	0	0	0	0	0	0	0	0	0	1.02164	0	0	0	0	0	0	0	0
hsa-miR-1244	0	0	0.18354	0.186738	0	0.481722	0	0	0.327443	0	0	0	0	0	0	0	0	0	0	0	0	0	0	0	0	0	0	0	0	0	0	0	0	0	0	0	0	0	0	0	0	0	0	0	0	0	0	0	0
hsa-miR-1245a	0	0.264149	0.42826	0.497967	0.306223	0	0	0	0.363826	0	0	0	0	0	0	0	0	0	0	0	0	0	0	3.46613	0	0	0	0	0	0	0	0	0	0	0	0	0	0	0	1.73228	0	0	0	0	0	0	0	0	0
hsa-miR-1245b-3p	0	0.330186	0.55062	0.311229	0.612446	0.562009	0.856675	0	0.327443	0	0	0	0	0	0	0	0	0	0	0	0	0	0	0	0	0	0	0	0	0	0	0	0	0	0	0.99488	0	0	1.38675	0	2.5541	0.663673	0	0	0	0	0	0	0
hsa-miR-1245b-5p	0	0	0	0	0	0	0	0	0.582121	0	0	0	0	0	0	0	0	0	0	0	0	0	0	0	0	0	0	0	0	0	0	0	0	0	0	0	0	0	0	0	0	0	0	0	0	0	0	0	0
hsa-miR-124-5p	0	0	0	0	0	0	0	0	0	0	0	0	0	0	0	0	0	0	0	0	0	0	0	0	0	0	0	0	0	0	0	0	0	0	0	0	0	0	0	0	0	0	0	0	0	0	0	0	0
hsa-miR-1246	2.81803	0	0	0	0	2.04732	0	0	3.16528	0	0	0	0	0	0	0	0	12.2356	3.25789	2.20417	17.2868	6.95188	3.42271	8.66533	0	0	0	0	0	0	0	0	0	0	10.6408	4.64277	0	7.4796	1.38675	0	5.1082	1.65918	0	0	0	0	0	0	0
hsa-miR-1247-3p	0	2.24527	3.30372	2.36534	3.00099	6.18209	5.56838	5.0724	2.07381	0	0	0	0	0	0	0	0	0	1.22171	5.0381	0	0	8.71236	4.95162	0	0	0	0	0	0	0	0	0	0	82.6226	73.2895	198.776	133.802	0	141.008	0	68.0265	0	0	0	0	0	0	0
hsa-miR-1247-5p	0.650314	34.8016	52.5536	50.7304	41.2176	9.43372	14.5635	10.1448	2.18295	0	0	0	0	0	0	0	0	9.94144	8.14472	44.7132	7.77905	8.49674	319.868	159.69	0	0	0	0	0	0	0	0	0	0	61.967	26.5301	65.5307	49.0329	10.8167	32.2205	26.5627	19.2465	0	0	0	0	0	0	0
hsa-miR-1248	2.16771	0	0	0	0	5.01793	0	0	19.4283	0	0	0	0	0	0	0	0	85.6494	52.9406	26.1352	105.449	56.7737	8.40121	12.1315	0	0	0	0	0	0	0	0	0	0	0	10.6121	15.2905	0	0	5.88976	0	0	0	0	0	0	0	0	0
hsa-miR-1249-3p	1.95094	4.4245	5.38384	3.29903	4.77708	3.09105	4.71171	4.56516	3.05614	22.8449	15.3625	18.9433	7.73895	6.71481	19.5893	14.4592	15.1631	3.82363	4.07236	19.5226	6.05037	6.56566	25.2036	14.6073	1.83472	1.70852	1.34347	0.856898	2.06219	1.40574	2.1971	2.36179	2.11785	0.728639	5.63336	11.9386	24.756	21.6077	6.93376	13.1653	17.8787	4.64571	3.76959	1.63615	1.67011	2.5461	1.64824	7.00416	4.73086
hsa-miR-1249-5p	0	0	0	0	0	0	0	0	0.181913	0	0	0	0	0	0	0	0	0	0	0	0	0	0	0	0	0	0	0	0	0	0	0	0	0	0	0	0	0	0	0	0	0	0	0	0	0	0	0	0
hsa-miR-1250-3p	0	0	0	0	0	0	0	0	0	0	0	0	0	0	0	0	0	0	0	0	0	0	0	0	0	0	0	0	0	0	0	0	0	0	0	0	0	0	0	0	0	0	0	0	0	0	0	0	0
hsa-miR-1250-5p	0	1.12263	1.16242	1.86738	1.16365	0	0	0	0	0	0	0	0	0	0	0	0	0	6.10854	4.72322	0	2.70351	1.24462	0	0	0	0	0	0	0	0	0	0	0	0	0	0	0	0	0	2.04328	0	0	0	0	0	0	0	0
hsa-miR-1251-3p	0	0	0	0	0	0	0	0	0	0	0	0	0	0	0	0	0	0	0	0	0	0	0	0	0	0	0	0	0	0	0	0	0	0	0	0.99488	0	0	2.49616	0	0	0.663673	0	0	0	0	0	0	0
hsa-miR-1251-5p	0	0	0	0	0	0.481722	0	0	0.836799	0	0	0	0	0	0	0	0	0	2.44341	5.35298	4.32169	4.24837	0	0	0	0	0	0	0	0	0	0	0	0	53.204	72.6263	72.8119	73.1339	102.897	69.9842	92.4585	44.7979	0	0	0	0	0	0	0
hsa-miR-1252-3p	0	0	0	0	0	0	0	0	0	0	0	0	0	0	0	0	0	0	0	0	0	0	0	0	0	0	0	0	0	0	0	0	0	0	0	0	0	0	0	0	0	0	0	0	0	0	0	0	0
hsa-miR-1252-5p	0	0	0	0	0	0	0	0	1.70998	0	0	0	0	0	0	0	0	0	0	0	0	0	0	0	0	0	0	0	0	0	0	0	0	0	0	0	0	0	0	0	0	0	0	0	0	0	0	0	0
hsa-miR-1253	0	0	0	0	0	0	0	0	0	0	0	0	0	0	0	0	0	0	0	0	0	0	0	0	0	0	0	0	0	0	0	0	0	0	0	0	0	0	0	0	0	0	0	0	0	0	0	0	0
hsa-miR-1254	0	0	0.9177	0.871442	1.04116	1.96703	0	0	0.764034	1.888	2.49641	2.05409	1.61228	0.99071	1.71585	1.49578	2.06769	0	0	2.83393	0	0	3.11156	2.72339	1.83472	2.39193	2.55259	1.79949	1.64975	1.9329	2.72441	1.62373	3.25823	2.76883	0	3.31627	8.00931	0	2.77351	6.92913	0	0	0.628265	0.701205	3.24199	1.4145	2.47235	0.574112	3.29103
hsa-miR-1255a	1.95094	6.99995	4.16024	2.92556	4.59335	1.36488	0	0	0.291061	0	0	0	0	0	0	0	0	0	0	4.40834	4.32169	5.40702	0	1.48549	0	0	0	0	0	0	0	0	0	0	0	1.65813	3.64059	3.32427	0	4.85039	3.57574	1.99102	0.448761	0	0.392968	0	0	0.229645	0
hsa-miR-1255b-5p	1.95094	2.44338	5.5062	3.05005	5.45077	0	0	0	0.873182	0.944002	0.576095	2.05409	1.93474	0.770552	1.28689	1.99437	2.20554	0	0	0	0	0	0	0	1.03203	0.227803	0.268693	0	0.412438	0.702872	0.790957	1.03328	0.814557	0.728639	0	0	0	0	0	0	0	0	0.807769	0	2.06308	2.2632	1.44221	1.83716	1.13129
hsa-miR-1256	0	0.396224	0.42826	0	0.122489	0.562009	0	0	0	0	0	0	0	0	0	0	0.275692	0	0	0	0	0	0	0	0	0	0	0	0	0	0.175768	0	0	0	0	0	0	0	2.2188	0	0	0	0	0	0	0	0	0	0
hsa-miR-1257	0	0	0	0	0	0	0	0	0	0	0	0	0	0	0	0	0	0	0	0	0	0	0	0	0	0	0	0	0	0	0	0	0	0	0	0	0	0	0	0	0	0	0	0	0	0	0	0	0
hsa-miR-1258	0	1.32075	1.10124	1.68064	2.14356	0	1.71335	0	0.509356	0	0	0	0	0	0	0	0	0	0	0	0	1.54486	0	0	0	0	0	0	0	0	0	0	0	0	0	0.99488	2.91248	0	0	0	0	0.99551	0	0	0	0	0	0	0
hsa-miR-125a-3p	1.5174	4.62261	3.9767	4.35721	6.06322	23.3234	2.57002	4.05792	14.553	0	0	0	0	0	0	0	0.275692	11.4709	5.7013	10.706	11.2364	6.17945	26.1371	29.9573	0	0	0	0	0	0	0	0	0	0	20.6557	20.8925	12.378	29.9184	20.2466	23.9055	16.8571	17.2555	0	0	0	0	0	0	0
hsa-miR-125a-5p	1084.51	457.308	594.975	555.171	625.675	2165.74	3224.52	3351.34	1239.04	168.221	147.672	176.652	468.69	202.875	213.337	629.721	865.261	2892.96	2686.13	5223.88	3468.59	3555.5	6524.63	17196	26.0301	27.3363	24.5854	26.3925	26.2929	23.3705	21.6195	23.3227	21.0156	18.3617	6664.89	7524.61	6272.74	10497.2	7394.44	7490.39	8018.86	7119.22	3.85934	1.98675	37.5285	33.0993	41.618	3.21502	2.57112
hsa-miR-125b-1-3p	8.88763	9.5754	10.0335	8.90116	7.65558	58.77	16.2768	13.1882	6.80354	0	0	0	0	0	0	0	0	51.2367	88.7774	187.04	63.0967	71.0637	50.4072	72.5412	0	0	0	0	0	0	0	0	0	0	225.96	281.551	220.62	302.508	214.947	232.819	185.428	222.994	0.179504	0	0.196484	0	0	0	0
hsa-miR-125b-2-3p	63.514	19.6791	17.1304	18.1135	12.5551	94.8189	686.625	628.47	46.8971	0	0	0	0	0	0	0	0	35.1774	45.2032	102.966	22.4728	54.0702	338.538	578.844	0	0	0	0	0	0	0.175768	0	0	0	678.507	769.374	650.938	764.581	631.25	675.59	616.049	681.26	0	0	0	0	0	0	0
hsa-miR-125b-5p	2562.46	2129.97	2912.04	3042.2	2793.98	1122.41	4295.37	4485.52	1026.64	480.686	469.709	117.996	185.574	282.132	605.266	176.501	677.376	5167.26	4703.57	10596.1	5612.15	6119.58	47638.3	61362.2	11.2377	8.9982	10.8821	6.16966	8.14565	8.3466	7.38227	7.3806	6.51646	6.2663	6424.54	7142.91	5785.63	9162.51	5002.85	7560.03	6416.41	6193.4	0.359008	0.584338	3.53671	2.829	3.91456	0	0.514223
hsa-miR-1260a	2.81803	0	0	0	0	9.71472	0	0	0	50.5985	32.2613	44.7336	33.8579	24.5476	73.0667	29.4169	17.6443	223.3	83.8906	0	401.053	174.183	0	88.3864	0	0	0	0	0	0	0	0	0	0	0	0	0	0	0	0	0	0	0	0	0	0	0	0	0
hsa-miR-1260b	0	50.6506	32.4254	37.3475	29.9486	26.575	19.2752	20.2896	38.893	215.799	129.237	156.339	136.883	88.2833	329.443	359.983	102.144	620.193	234.568	284.653	1030.29	500.535	45.7399	148.549	0	21.4134	0	0	0	17.0446	15.3797	0	0	12.5326	215.946	347.876	307.266	241.84	201.357	214.457	459.227	147.999	0	0	13.4592	0	0	0	18.8206
hsa-miR-1261	0	0	0	0	0	0	0	0	0	0	0	0	0	0	0	0	0	0	0	0	0	0	0	0	0	0	0	0	0	0	0	0	0	0	0	0	0	0	0	0	0	0	0	0	0	0	0	0	0
hsa-miR-1262	0	6.07543	7.15806	8.15421	8.08429	2.4889	0	0	2.5104	0	0	0	0	0	0	0	0	4.58836	3.66512	4.40834	3.45735	3.86216	2.48925	3.21855	0	0	0	0	0	0	0	0	0	0	0	0	3.64059	0	3.60556	3.46457	5.61902	3.6502	0	0	0	0	0	0	0
hsa-miR-1263	0	0	0	0	0	0	0	0	0	0	0	0	0	0	0	0	0	0	0	0	0	0	0	0	0	0	0	0	0	0	0	0	0	0	0	0	0	0	0	0	0	0	0	0	0	0	0	0	0
hsa-miR-126-3p	5365.96	11.4905	17.1304	19.6074	15.8624	1027.07	1589.13	1578.53	28100.4	294.718	276.525	256.762	187.831	47.6642	152.568	25.9268	64.512	10493.6	12087.6	12243.8	9516.37	13061	16376.4	15444.8	16.7418	16.4018	14.5094	7.79777	9.58918	10.4552	11.6886	10.4804	13.3587	12.2411	7081.14	5811.1	6992.85	5330.46	7578.05	6282.99	6338.26	7642.53	9.42397	0.818073	81.1479	56.0142	50.0652	20.5532	11.7243
hsa-miR-1264	0	0	0	0	0	0	0	0	0	0	0	0	0	0	0	0	0	0	0	0	0	0	0	0	0	0	0	0	0	0	0	0	0	0	0	0	0	0	0	0	0	0	0	0	0	0	0	0	0
hsa-miR-1265	0	0.264149	0.97888	0.74695	0.857424	0.481722	0	0	0	0	0	0	0	0	0	0	0	0	0	0	0	1.15865	0	0	0	0	0	0	0	0	0	0	0	0	0	0	0	0	0	0	0	0	0	0	0	0	0	0	0
hsa-miR-126-5p	371.113	55.0751	72.4983	114.719	62.837	1880.44	12500.2	12043.4	6681.55	133.104	147.096	135.798	82.5488	52.9479	59.4828	6.48169	25.5016	4322.23	3902.13	2738.21	3405.49	5294.24	2838.36	1344.36	89.0985	92.9434	91.8931	36.0754	46.5024	67.2121	66.7041	64.9493	59.2998	58.2911	20505.4	17427	16231.2	14747.3	22138.7	13191.3	19115.4	25966.2	0.718017	0	23.1851	9.05281	31.7285	4.36325	3.08534
hsa-miR-1266-3p	0	0	0	0	0	0	0	0	0	0	0	0	0	0	0	0	0	0	0	0	0	0	0	0	0	0	0	0	0	0	0	0	0	0	0	0	0	0	0	0	0	0	0	0	0	0	0	0	0
hsa-miR-1266-5p	0	2.57545	2.7531	2.42759	1.22489	4.25521	0	0	3.45634	0	0	0	0	0	0	0	0	0	0	0	0	0	0	0	0	0	0	0	0	0	0	0	0	0	9.38894	4.9744	7.28119	5.81747	2.77351	6.58267	5.1082	3.6502	0	0	0	0	0	0	0
hsa-miR-1267	0	0	0	0	0	0	0	0	0	0	0	0	0	0	0	0	0	0	0	0	0	0	0	0	0	0	0	0	0	0	0	0	0	0	0	0	0	0	0	0	0	0	0	0	0	0	0	0	0
hsa-miR-1268a	0	0	0	0	0	0	0	0	0	0	0	0	0	0	0	0	0	0	0	0	0	0	0	0	0	0	0	0	0	0	0	0	0	0	0	0	0	0	0	0	0	0	0	0	0	0	0	0	0
hsa-miR-1268b	1.5174	3.10375	2.81428	1.92962	1.34738	2.93047	8.13841	7.10136	6.94907	0	0	0	0	0	0	0	0	23.7065	19.5473	21.7268	51.8603	21.6281	42.006	58.9243	0	0	0	0	0	0	0	0	0	0	5.00743	5.96928	5.09683	9.14173	3.88291	5.5433	8.17312	0	0	0	0	0	0	0.229645	0
hsa-miR-1269a	0	14.0659	3.54844	4.97967	2.44978	1.88674	0	0	0	0	0	0	0	0	0	0	0	0	0	0	0	0	0	0	0	0	0	0	0	0	0	0	0	0	0	0	0	0	0	0	0	0	0	0	0	0	0	0	0
hsa-miR-1269b	0	4.55657	1.95776	1.80513	1.34738	0	0	0	0	0	0	0	0	0	0	0	0	0	0	0	0	0	0	0	0	0	0	0	0	0	0	0	0	0	0	0	0	0	0	0	0	0	0	0	0	0	0	0	0
hsa-miR-1270	0	2.50942	3.85434	2.42759	3.91965	1.04373	0	0	3.71102	0.566401	0	0.912931	1.28983	0	1.1439	0	0.964924	4.58836	0	1.88929	0	2.70351	6.84543	4.45646	0	0	1.07477	0.342759	0.309328	0.527154	0.263652	0	0.488734	0	13.1445	8.6223	8.73743	13.2971	9.70727	8.31496	10.2164	6.30489	1.97455	0.350603	2.45605	0	1.44221	2.75574	1.95405
hsa-miR-1271-3p	0	0.132075	0	0	0	0	0	0	1.12786	0	0	0	0	0	0	0	0	0	0	0	0	3.47594	4.04503	0	0	0	0	0	0	0	0	0	0	0	0	0	0	0	0	0	0	0	0	0	0	0	0	0	0
hsa-miR-1271-5p	77.6042	7.92447	8.68756	8.46544	7.28811	1.32473	48.8304	42.6082	2.80146	0.566401	0.576095	0.684698	1.93474	7.70552	2.71676	0	1.37846	13.0004	20.769	37.156	20.7441	19.3108	52.5853	108.688	0	0	0	0.257069	0	0	0	0	0	0	6.25929	4.31115	8.00931	7.4796	7.48847	10.3937	6.64066	4.97755	0	0	0.49121	0	0	0	0
hsa-miR-1272	0	0	0	0	0	0	0	0	0	0	0	0	0	0	0	0	0	0	0	0	0	0	0	0	0	0	0	0	0	0	0	0	0	0	0	0	0	0	0	0	0	0	0	0	0	0	0	0	0
hsa-miR-1273a	0	0	0	0	0	0	0	0	0	0	0	0	0	0	0	0	0	0	0	0	0	0	0	0	0	0	0	0	0	0	0	0	0	0	0	0	0	0	0	0	0	0	0	0	0	0	0	0	0
hsa-miR-1273c	4.5522	0.858485	1.5295	0.622459	1.28614	0	0	0	0	4.15361	2.11235	2.51056	2.57965	2.42174	4.28963	2.99155	3.72185	0	32.5789	0	0	73.7672	0	6.4371	0	0	0	0	0	0	0	0	0	0	0	0	0	0	0	0	0	0	0	0	0	0	0	0	0
hsa-miR-1273d	0	0	0	0	0	1.8466	0	0	0.691269	0	0	0	0	0	0	0	0	0	0	5.0381	6.05037	0	0	0	0	0	0	0	0	0	0	0	0	0	23.1594	3.97952	10.1937	9.9728	0	12.8189	10.2164	0	0	0	0	0	0	0	0
hsa-miR-1273e	0	0	0	0	0	0	0	0	0	0	0	0	0	0	0	0	0	0	0	0	0	0	0	0	0	0	0	0	0	0	0	0	0	0	0	0	0	0	0	0	0	0	0	0	0	0	0	0	0
hsa-miR-1273f	0	0	0	0	0	2.20789	0	0	0.800417	0	0	0	0	0	0	0	0	0	0	0	0	3.08972	0	4.70404	0	0	0	0	0	0	0	0	0	0	18.1519	3.31627	8.73743	12.466	1.94145	9.70078	7.15148	0	0	0	0	0	0	0	0
hsa-miR-1273g-3p	1.95094	1.84904	0	1.92962	0	4.45593	0	0	1.89189	0	0	1.14116	0	0.770552	0	0	0	147.592	67.6011	19.2078	174.596	124.361	14.002	35.8992	0	0	0	0	0	0	0	0	0	0	50.0743	3.97952	17.4749	25.7631	7.21112	24.252	15.8354	4.97755	0	0	0	0	0	0	0
hsa-miR-1273g-5p	0	0	0	0	0	0	0	0	0	0	0	0	0	0	0	0	0	0	0	0	0	0	0	0	0	0	0	0	0	0	0	0	0	0	0	0	0	0	0	0	0	0	0	0	0	0	0	0	0
hsa-miR-1273h-3p	0	1.58489	2.7531	0	2.26605	3.61291	1.28501	0	0.691269	0	0.768126	0.912931	1.45105	1.87134	1.00091	2.99155	2.34339	0	0	1.25953	0	1.54486	0	0	1.49071	1.48072	2.0152	1.19966	1.44353	1.84504	1.6698	2.06657	1.4662	1.60301	5.63336	3.64789	8.00931	0	1.94145	2.77165	0	0	0.807769	0.701205	0.687694	0	0	0.803756	0.617068
hsa-miR-1273h-5p	0	0	0	0	0	1.60574	0	0	0.363826	0	0	0	0	0	0	0	0	0	0	0	0	0	0	2.72339	0	0	0.40304	0	0	0	0	0	0	0	0	0	0	0	0	0	0	0	0	0	0	0	0	0	0
hsa-miR-127-3p	129.629	408.308	668.82	443.066	493.754	1770.41	1177.93	1144.33	95.6134	2.26561	3.6486	6.39052	5.1593	10.7877	8.57926	9.47324	23.1582	626.311	506.194	842.937	382.902	502.853	1439.41	2429.26	15.3658	10.8206	10.3447	13.0248	12.8887	12.1245	14.7645	11.809	10.5892	11.3668	888.819	870.52	1132.22	629.948	476.211	567.842	516.95	846.847	0	0	22.8904	44.4153	30.9044	5.28183	1.8512
hsa-miR-1275	0	20.4055	11.6242	6.53582	8.57424	14.6524	5.14005	0	10.078	1.6992	1.34422	1.3694	1.28983	0.770552	1.85884	0	0	16.0593	14.2533	57.9382	15.5581	19.697	40.1391	41.5936	0.68802	0	0.80608	0	0	1.23003	0	0	0	0.582911	48.1965	80.9169	63.3463	84.7688	82.9278	77.6063	72.5365	46.4571	0	0	0.49121	0	0	0	0.822757
hsa-miR-127-5p	3.25157	3.63205	4.34378	2.48983	2.69476	11.0395	2.14169	3.55068	15.026	0	0	0	0	0	0	0	0	144.533	120.135	160.59	53.589	107.754	143.754	191.628	0	0	0	0	0	0	0	0	0	0	7.51115	6.63254	6.55307	6.64853	4.43761	7.9685	8.68394	4.64571	0	0	0	0	0	0	0
hsa-miR-1276	0	0.198112	0	0.248983	0	1.00359	2.14169	1.52172	0.836799	0	0	0	0	0	0	0	0	0	0	0	0	0	0	0	0	0	0	0	0	0	0	0	0	0	0	0.99488	0	0	0	0	0	0	0	0	0	0	0	0	0
hsa-miR-1277-3p	0.650314	12.6131	6.17918	7.96747	4.59335	0.200717	0	0	12.3701	0	0	0	0	0	0	0	0	6.88254	4.47959	6.92739	6.91471	5.40702	4.35618	6.18952	0	0	0	0	0	0	0	0	0	0	0	0.663254	0	1.66213	1.1094	1.03937	0	0	0	0	0	0	0	0	0
hsa-miR-1277-5p	2.16771	1.51886	1.10124	2.05411	0.979914	1.32473	0	2.5362	52.1726	0	0	0	0	0	0	0	0	43.5894	25.2486	17.6334	44.0813	37.0767	6.22312	1.73307	0	0	0	0	0	0	0	0	0	0	4.3815	5.30603	6.55307	1.66213	6.93376	5.88976	5.1082	2.65469	0	0	0	0	0	0	0
hsa-miR-1278	0.650314	3.96224	3.18136	4.91742	3.4297	0.361291	0	0	0.472973	0	0	0	0	0	0	0	0	7.64727	4.47959	1.57441	0	2.70351	0	1.73307	0	0	0	0	0	0	0	0	0	0	0	0.663254	1.45624	3.32427	0.554701	1.73228	0	0	0	0	0	0	0	0	0
hsa-miR-1279	0	0	0	0	0	0	0	0	0	0	0	0	0	0	0	0	0	0	0	0	0	0	0	0	0	0	0	0	0	0	0	0	0	0	0	0	0	0	0	0	0	0	0	0	0	0	0	0	0
hsa-miR-1281	0	0	0	0	0	0	0	0	0	0	0	0	0	0	0	0	0	0	0	0	0	0	0	0	0	0	0	0	0	0	0	0	0	0	0	0	0	0	0	0	0	0	0	0	0	0	0	0	0
hsa-miR-128-1-5p	4.11866	0	0	0	0	3.09105	6.42506	7.6086	1.38254	0	0	0	0	0	0	0	0	0	0	2.20417	0	0	0	0	0.91736	0.569506	0.940426	0.17138	0.412438	0.439295	0.527305	0.73806	0.651646	0.582911	6.88522	9.28555	6.55307	4.15533	8.87522	8.66141	7.6623	5.97306	0.448761	0.350603	0.589452	0	0.618089	1.14822	0.617068
hsa-miR-1282	0	0	0	0	0	0	0	0	0	0	0	0	0	0	0	0	0	0	0	0	0	1.54486	0	0	0	0	0	0	0	0	0	0	0	0	0	0	0	0	0	0	0	0	0	0	0	0	0	0	0
hsa-miR-128-2-5p	0	0	0	0	0	0	0	0	0	0	0	0	0	0	0	0	0	0	0	0	0	0	0	0	0	0	0	0	0	0	0	0	0	0	0	0	0	0	0	0	0	0	0	0	0	0	0	0	0
hsa-miR-1283	0	0	0	0	0	0	0	0	1.41892	0	0	0	0	0	0	0	0	0	0	0	0	0	0	0	0	0	0	0	0	0	0	0	0	0	0	0	0	0	0	0	0	0	0	0	0	0	0	0	0
hsa-miR-128-3p	3602.09	289.243	281.979	326.355	313.94	130.105	107.941	111.593	28.1237	177.661	177.245	187.607	217.658	112.06	227.207	154.563	190.503	764.727	871.892	1207.57	733.823	879.413	187.627	485.506	204.112	230.536	200.042	78.2348	95.4793	182.571	190.445	170.639	170.08	150.828	190.908	205.609	211.154	207.767	260.155	229.701	215.055	208.062	13.5526	0.93494	62.1872	15.2766	24.7235	17.9123	24.477
hsa-miR-1284	0	0.660373	0.73416	0.74695	0.673691	0.9233	0	0	0.654886	2.45441	2.30438	3.42349	3.86948	2.75197	4.00365	1.99437	2.89477	0	0	0	0	2.70351	0	0	0.34401	0	0	0	0	0	0	0.442836	0	0	0	0	0	0	0	0	0	0	0	0	0.196484	0	0	0	0
hsa-miR-1285-3p	3.90189	6.00939	7.9534	10.5818	8.32927	15.7362	3.85504	4.56516	47.0063	26.6209	17.2828	25.3338	34.8253	10.3474	31.1713	23.9324	35.2886	29.0596	27.2848	26.1352	33.7092	34.7594	0	7.42743	27.2914	34.7399	32.9149	8.48329	8.66119	15.6389	12.3038	15.9421	12.87	13.1155	28.7927	19.8976	35.6778	24.932	19.9692	25.6378	29.6276	24.2241	6.3724	0.93494	15.424	2.5461	8.85927	25.3757	24.8884
hsa-miR-1286	0	0	0.18354	0	0	0.401435	0	0	0.436591	0	0	0	0	0	0	0	0	0	0	0	0	0	0	0	0	0	0	0	0	0	0	0	0	0	0	0.99488	0	0	0	0	0	0	0	0	0	0	0	0	0
hsa-miR-1287-3p	0	0.132075	0.18354	0	0	0	0	0	0.909564	0	0	0	0	0	0	0	0	4.58836	2.03618	2.83393	4.32169	3.47594	2.48925	1.73307	0	0	0	0	0	0	0	0	0	0	0	0	0	0	0	0	0	0	0	0	0	0	0	0	0
hsa-miR-1287-5p	6.50314	9.37729	12.3584	7.34501	9.92163	4.21506	2.14169	2.02896	4.69335	0.755202	0	0	1.61228	0	0.714938	0	0	9.17672	6.92301	14.7994	10.3721	8.11053	45.1176	43.3267	0.80269	0.227803	0.80608	0	0.206219	0.263577	0.175768	0	0	0	9.38894	6.30091	9.46555	9.9728	8.59787	10.3937	8.17312	9.29142	0	0	0.294726	0	0	0	0
hsa-miR-1288-3p	0	0	0	0	0	0	0	0	0	0	0	0.684698	0.322456	0	0	0	0	0	0	0	0	0	0	0	0	0	0	0	0	0	0	0	0	0	0	0	0	0	0	0	0	0	0	0	0	0	0	0	0
hsa-miR-1288-5p	0	0	0	0	0	0	0	0	0	0	0	0	0	0	0	0	0	0	0	0	0	0	0	0	0	0	0	0	0	0	0	0	0	0	0	0	0	0	0	0	0	0	0	0	0	0	0	0	0
hsa-miR-1289	0	0.264149	0.6118	0.684704	0	0	0	0	0	0	1.15219	0	0	0	0	0	0.413539	0	0	0	0	0	0	0	0	0	0	0	0	0	0	0	0	0	0	0	0	0	0	0	0	0	0	0	0	0	0	0	0
hsa-miR-1290	0	0	0	0	0	0	0	0	0	0	0	0	0	0	0	0	0	0	0	0	0	0	0	0	0	0	0	0	0	0	0	0	0	0	0	0	0	0	0	0	0	0	0	0	0	0	0	0	0
hsa-miR-1291	3.68511	9.24522	11.0124	11.3287	11.2078	1.16416	0	0	4.47506	0	0	0	0	0	0	0	0.275692	6.11781	4.88683	5.0381	6.05037	5.79323	2.17809	6.18952	0	0	0	0	0	0	0	0	0	0	9.38894	4.9744	8.00931	9.9728	3.05086	6.92913	7.6623	4.97755	0	0	0	0	0	0	0
hsa-miR-129-1-3p	0	1.12263	1.59068	2.80106	1.77609	0.562009	0	0	0	1.6992	1.15219	2.51056	0.483685	1.21087	1.42988	2.49296	0.964924	23.7065	37.4657	46.6024	50.996	27.4213	0	0	0	0	0	0	0.206219	0.175718	0	0	0.325823	0	0	0	0	0	0	0	0	0	0	0	0	0	0	0	0
hsa-miR-1292-3p	0	0	0	0	0	0	0	0	0	0	0	0	0	0	0	0	0	0	0	0	0	0	0	0	0	0	0	0	0	0	0	0	0	0	0	0	0	0	0	0	0	0	0	0	0	0	0	0	0
hsa-miR-129-2-3p	0	8.91503	9.91116	19.8564	12.0039	1.88674	0	0	0.545739	0.566401	0.384063	0	0.483685	0	0.714938	0	0.413539	31.3538	27.692	102.651	47.5386	33.6007	1.24462	0.990324	0	0	0	0	0	0.175718	0	0.295224	0	0	0	0	5.82495	2.4932	1.94145	2.4252	0	0	0	0	0	0	0	0	0
hsa-miR-1292-5p	1.08386	0.660373	0.6118	0.74695	0.306223	0	0	0	7.16737	8.87362	6.52907	10.2705	9.99615	14.3103	13.0119	0.997183	2.06769	0	4.07236	4.09346	0	0	13.6909	31.9379	0	0.227803	0	0	0	0	0	0	0	0	121.43	0	272.316	0	117.319	0	0	120.788	0	0	1.1789	0	0	0	0.205689
hsa-miR-1293	0	0	0	0	0	0	0	0	0	0	0	0	0	0	0	0	0	0	0	0	0	0	0	0	0	0	0	0	0	0	0	0	0	0	0	0	0	0	0	0	0	0	0	0	0	0	0	0	0
hsa-miR-1294	0	1.91508	3.12018	2.61433	3.4297	1.16416	0	0	0.727651	3.58721	3.07251	5.02112	4.35316	0.99071	3.71768	3.49014	6.89231	0	0	2.51905	0	0	0	1.2379	1.94939	1.82242	2.55259	1.19966	0.515547	2.89935	2.02133	1.47612	1.62911	1.16582	0	0	0	0	1.94145	0	4.59738	0	4.84661	0	8.05585	4.2435	5.5628	6.54487	9.15318
hsa-miR-1295a	0	0	0	0	0	1.04373	20.5602	15.2172	0.764034	0	0	0	0	0	0	0	0	0	0	0	0	0	0.933467	2.22823	0	0	0	0	0	0	0	0	0	0	0	0	0	0	0	0	0	1.99102	0	0	0	0	0	0	0
hsa-miR-1295b-3p	0	0	0	0	0	0	0	1.52172	0	0	0	0	0	0	0	0	0	0	0	0	0	0	0	0	0	0	0	0	0	0	0	0	0	0	0	0	0	0	0	0	0	0	0	0	0	0	0	0	0
hsa-miR-129-5p	0	0.462261	0.67298	1.43165	0.612446	12.4043	0	0	0.727651	0	0	0	0	0	0	0	0	22.1771	33.8006	92.89	57.9107	32.0559	4.35618	2.22823	0	0	0	0	0	0	0	0	0	0	0	2.65301	10.1937	0	0	0	4.08656	0	0	0	0	0	0	0	0
hsa-miR-1296-3p	0	0	0	0	0	0	0	0	0	0	0	0	0	0	0	0	0	0	0	0	0	0	0	0	0	0	0	0	0	0	0	0	0	0	0	0	0	0	0	0	0	1.65918	0	0	0	0	0	0	0
hsa-miR-1296-5p	43.7878	5.21694	1.65186	2.3031	1.89858	33.3994	4.28337	5.57964	5.20271	3.20961	3.26454	5.02112	3.22456	3.30237	5.29054	0	4.68677	14.5298	15.475	50.0661	15.5581	21.2419	39.2056	22.0347	0	0.455605	0	0.257069	0.412438	0.175718	0.527305	0.442836	0	0.291456	36.9298	33.1627	51.6964	66.4853	36.8876	44	57.2119	35.1747	0	0.350603	0.49121	0.5658	1.03015	0	0.308534
hsa-miR-1297	0	0	0	0	0	0	0	0	0	0	0	0	0	0	0	0	0	0	0	0	0	0	0	0	0	0	0	0	0	0	0	0	0	0	0	0	0	0	0	0	0	0	0	0	0	0	0	0	0
hsa-miR-1298-3p	0	0	0	0	0	0	0	0	0	0	0	0	0	0	0	0	0	0	0	0	0	0	0	0	0	0	0	0	0	0	0	0	0	0	0	0	0	0	0	0	0	0	0	0	0	0	0	0	0
hsa-miR-1298-5p	0	1.58489	1.16242	1.68064	1.04116	0	0	0	0.909564	0	0	0	0	0	0	0	0	0	0	0	0	0	0	0	0	0	0	0	0	0	0	0	0	0	0	0.99488	0	0	0	0	0	0	0	0	0	0	0	0	0
hsa-miR-1299	0	5.74524	14.622	39.5884	14.1475	4.25521	0	0	3.45634	0	0	2.05409	1.77351	0	0	0	1.10277	0	5.29406	51.6405	61.368	5.79323	12.7574	3.46613	0.22934	0.455605	0.40304	0	0	0.439295	0	0	0	0	12.5186	0	10.9218	0	18.0278	20.0945	20.4328	30.529	0	0	0.392968	0	0	0	0.617068
hsa-miR-1301-3p	6.50314	13.6697	15.1726	11.4532	14.515	7.18568	9.42342	9.13032	6.76716	6.79682	4.99282	4.79289	7.73895	4.40316	7.29237	12.9634	15.1631	9.94144	11.4026	24.5607	12.9651	8.88296	118.862	424.354	0.34401	0.91121	0.40304	0.428449	0	0.615013	0.439421	0.442836	0.325823	0	15.0223	10.6121	18.203	14.1281	18.3051	13.5118	18.9003	16.9237	1.88479	0.584338	6.48397	1.1316	2.47235	2.52609	3.39387
hsa-miR-1301-5p	0	0	0	0	0	0	0	0	0	0	0	0	0	0	0	0	0	0	0	0	0	0	0	0	0	0	0	0	0	0	0	0	0	0	0	0	0	0	0	0	0	0	0	0	0	0	0	0	0
hsa-miR-1302	0	0	0	0	0	0	0	0	0	0	0	0	0	0	0	0	0	0	0	0	0	0	0	0	0	0	0	0	0	0	0	0	0	0	0	0	0	0	0	0	0	0	0	0	0	0	0	0	0
hsa-miR-1303	79.3383	8.05655	0	2.48983	2.93974	15.6961	12.4218	13.1882	21.5385	18.6912	12.6741	19.628	15.6391	8.25592	24.3079	17.9493	19.712	3183.56	1618.76	437.685	4677.8	2866.11	79.967	75.2646	1.72005	1.82242	1.61216	1.45673	0.927985	1.14217	1.14249	1.03328	1.14038	1.16582	25.6631	17.5762	13.8343	20.7767	9.70727	16.2835	17.3679	12.278	0	0	1.67011	0	1.64824	1.49269	1.02845
hsa-miR-1304-3p	0	0	0	0	0	0	0	0	0	0	0	0	0	0	0	0	3.72185	0	0	0	0	0	0	0	0	0	0	0	0	0	0	0	0	0	0	0	0	0	0	0	0	0	0	0	0	0	0	38.5803	22.4201
hsa-miR-1304-5p	0	0	0.42826	0	0	0	0	0	0	6.23042	3.07251	0	2.90211	1.21087	3.86066	1.49578	2.89477	0	0	0	0	8.11053	0	0	0	0	0	0	0	0	0	0	0	0	0	0	0	0	0	0	0	0	0	0	0	0	0	3.32985	0
hsa-miR-1305	0	0	0	0	0	0	0	0	0.363826	0	0	0	0	0	0	0	0	2.29418	0.814472	2.51905	0	0	0	0	0	0	0	0	0	0	0	0	0	0	0	0	0	0	0	0	0	0	0	0	0	0	0	0	0
hsa-miR-1306-3p	2.81803	7.06599	8.38166	5.91336	8.57424	0.9233	0	0	0.509356	0.377601	0	0	0	0	0	0	0.689231	0	0	2.51905	0	0	1.24462	0	0	0	0	0	0	0	0	0	0	0	0	0	0	0	1.1094	0	0	1.32735	0.448761	0	0.687694	0	0	0.459289	1.23414
hsa-miR-1306-5p	3.68511	3.8962	5.5062	3.73475	4.65459	1.88674	0	2.02896	4.51144	30.5857	17.8589	33.0937	17.0902	12.9893	23.307	26.924	20.2634	0	1.62894	6.61251	0	1.15865	8.40121	16.5879	4.01345	5.35336	2.95563	1.62811	2.68085	2.37219	2.54864	2.06657	3.25823	2.6231	0	4.31115	5.09683	4.9864	4.16026	4.15748	5.1082	2.65469	1.61554	0.584338	4.12616	6.2238	1.44221	4.01878	4.11379
hsa-miR-1307-3p	60.2625	51.6411	50.5347	50.5436	61.7346	75.4697	51.4005	51.7385	85.2444	47.9553	24.58	28.9856	20.6372	10.0172	20.0183	28.4197	28.2585	34.4127	45.2032	103.281	44.9456	35.5318	196.028	126.514	15.0218	17.5408	11.6882	11.5681	9.17674	14.7603	16.9616	14.9088	13.3587	16.613	85.1264	88.5444	116.499	105.545	92.0804	74.1417	87.3503	53.7575	11.219	1.75301	19.2554	16.6911	13.804	19.9791	27.151
hsa-miR-1307-5p	14.0901	36.7167	20.74	15.4992	9.6154	39.6617	636.081	636.586	215.167	1.1328	1.34422	0.456466	0.967369	0	0.714938	0	0.413539	97.1203	60.6781	136.344	63.9611	80.719	173.003	134.189	3.66944	5.58116	4.29909	2.14224	2.57774	3.8658	4.04267	3.98552	2.76949	4.66329	287.927	375.402	626.91	335.751	316.18	304.535	273.289	103.533	0.448761	0.46747	9.62772	4.2435	9.47736	2.75574	0.822757
hsa-miR-130a-3p	5.63606	306.743	361.023	371.732	332.926	476.704	427.481	399.705	1144.56	66.269	35.7179	80.3379	106.249	18.2731	59.4828	35.4	72.3693	525.367	562.8	930.475	517.739	627.6	1137.9	1592.94	94.832	99.3219	97.5356	45.1585	57.432	80.391	85.4234	79.2676	73.1472	77.2357	3003.83	3271.5	2245.52	3002.64	3543.15	3240.41	2630.72	3220.81	3.76959	0.233735	90.9721	23.7636	54.8039	22.9645	10.9015
hsa-miR-130a-5p	0	0	0	0	0	0	0	0	0	0	0	0	0	0	0	0	0	0	0	0	0	0	0	0	0	0	0	0	0	0	0	0	0	0	0	0	0	0	0	0	0	0	0	0	0	0	0	0	0
hsa-miR-130b-3p	0	11.4244	9.72762	16.8686	12.5551	122.157	214.169	203.911	48.498	22.8449	9.60158	18.4869	22.0883	6.2745	19.3033	19.9437	16.4037	1319.15	1655.41	1572.83	1127.96	1836.84	79.967	66.1041	34.401	37.4735	34.3927	18.7661	23.3027	33.035	35.9446	33.0651	32.5823	30.8943	107.66	100.815	186.398	58.1747	95.1312	93.8897	84.7962	99.551	3.59008	0.46747	23.4798	5.0922	9.68339	11.2526	11.7243
hsa-miR-130b-5p	2.81803	0.198112	0.36708	0.186738	0	19.871	34.267	24.3475	3.1289	61.3602	41.2868	62.3075	60.1381	47.9944	49.3307	73.293	57.8954	435.894	568.501	387.619	388.088	551.902	37.0275	36.1468	14.9071	14.1238	12.0912	8.65467	9.07363	15.3753	15.204	11.6613	9.12304	12.2411	30.0446	19.2344	29.1248	15.7903	16.0863	19.4016	20.4328	20.9057	5.38513	0.46747	8.15409	5.0922	3.91456	2.98538	3.59956
hsa-miR-1321	0	0	0	0	0	0	0	0	0	0	0	0	0	0	0	0	0	0	0	0	0	0	0	0	0	0	0	0	0	0	0	0	0	0	0	0	0	0	0	0	0	0	0	0	0	0	0	0	0
hsa-miR-1322	0	0	0	0	0	0	0	0	0	0	0	0	0	0	0	0	0	0	0	0	0	0	0	0	0	0	0	0	0	0	0	0	0	0	0	0	0	0	0	0	0	0	0	0	0	0	0	0	0
hsa-miR-1323	3.68511	0.924522	0.85652	0.74695	0.489957	0	0	0	0.436591	0	0	0	0	0	0	0	0	0	0	0	0	0	0	1.73307	0	0	0	0	0	0	0	0	0	0	0	0	0	0	0	0	0	0	0	0	0	0	0	0	0
hsa-miR-132-3p	9.53794	18.8206	41.1741	70.3378	36.9305	127.415	24.8436	32.9706	63.2329	7.36322	5.76095	4.79289	5.1593	1.87134	6.72042	4.48733	5.92739	181.24	575.017	1930.85	249.794	387.76	205.674	179.001	1.94939	2.16412	2.14955	0.599828	1.1342	1.4936	1.75768	1.62373	0.651646	2.04019	85.1264	107.115	158.73	102.221	79.0449	73.7952	98.0775	103.533	0.269256	0	2.16132	0.5658	1.85427	0.918578	0.205689
hsa-miR-1324	0	0	0	0	0	0	0	0	0	0	0	0	0	0	0	0	0	0	0	0	0	0	0	0	0	0	0	0	0	0	0	0	0	0	0	0	0	0	0	0	0	0	0	0	0	0	0	0	0
hsa-miR-132-5p	4.5522	3.16979	9.29936	8.21645	8.57424	7.90826	2.57002	2.02896	5.16632	0	0.768126	0.684698	0.806141	0	0.714938	0	0.275692	57.3545	139.275	337.868	70.8758	123.203	22.0921	11.8839	0	0	0	0	0	0	0	0	0	0	6.88522	5.63766	12.378	9.9728	5.54701	2.77165	6.12984	6.30489	0	0	0.294726	0	0	0	0
hsa-miR-133a-3p	95835.7	394.375	423.916	418.105	344.623	1868.64	11.1368	15.7244	29.8701	22.0897	2.88047	1.59763	2.74088	3.85276	0.857926	0	1.24062	22.9418	37.8729	106.745	28.5232	56.3875	123.529	26.4912	0.91736	1.02511	0.537386	1.37104	0.927985	0.702872	0.615189	1.03328	0.488734	0.874367	118.927	204.614	153.633	368.994	101.51	109.827	90.4152	207.398	0	0	2.35781	1.4145	1.03015	0.459289	0.411379
hsa-miR-133a-5p	2801.99	6.66976	6.7298	5.9756	4.89957	6.54339	0	0	0.582121	0	0	0	0	0	0	0	0	0	0	1.25953	0	2.31729	8.71236	0	0	0	0	0	0	0	0	0	0	0	0	0	0	0	0	2.07874	0	1.99102	0	0	0	0	0	0	0
hsa-miR-133b	8343.1	52.3676	43.3154	52.0375	42.2588	46.0847	0	0	2.32848	0	0	0	0	0	0	0	0	0	1.62894	4.72322	0	4.24837	0	0	0	0	0	0	0	0	0	0	0	0	11.2667	5.63766	5.09683	12.466	2.49616	4.15748	5.1082	8.29591	0	0	0	0	0	0	0
hsa-miR-1343-3p	0	0	0	0	0	1.36488	0	0	0.582121	1.6992	1.34422	2.51056	0.967369	2.0915	3.28871	4.48733	0.964924	0	0	3.4637	0	0	3.73387	7.67501	0	0	0	0.17138	0	0	0	0	0	0	0	2.32139	0	4.15533	1.1094	2.77165	2.5541	0	0.448761	0	0.687694	0	0	0.688934	0
hsa-miR-1343-5p	0	0	0	0	0	0	0	0	0	0	0	0	0	0	0	0	0	0	0	0	0	0	0	0	0	0	0	0	0	0	0	0	0	0	0	0	0	0	0	0	0	0	0	0	0	0	0	0	0
hsa-miR-134-3p	0	0	0	0	0	1.48531	0	0	0.654886	0	0	0	0	0	0	0	0	8.41199	8.55195	7.87203	0	4.63459	0	5.94194	0	0	0	0	0	0	0	0	0	0	0	0	0	0	0	0	0	0	0	0	0	0	0	0	0
hsa-miR-134-5p	4.5522	12.2169	18.6599	31.6831	19.5983	24.5678	14.1351	9.13032	5.67568	0	0.384063	0	0.483685	0	0	0	0	217.182	247.192	271.113	107.178	188.473	110.46	196.332	0	0.569506	0.537386	0	0	0	0	0	0	0	11.2667	11.6069	17.4749	5.81747	7.48847	11.4331	7.6623	9.29142	0	0	0.884178	0	1.44221	0.344467	0.308534
hsa-miR-135a-3p	0	0	0	0	0	1.52545	0	0	0	0	0	0	0	0	0	0	0	0	0	0	2.59302	0	0	0	0	0	0	0	0	0	0	0	0	0	0	0	0	0	0	0	0	0	0	0	0	0	0	0	0
hsa-miR-135a-5p	11.0553	0.990559	0.42826	0.74695	0.306223	6.54339	0	0	51.6632	0.566401	0.384063	0.684698	0.644913	0	0.428963	0	0	356.363	691.894	308.269	1148.71	954.725	3.42271	0	0	0	0	0	0	0	0	0	0	0	2076.21	2489.19	1876.36	3585.22	3570.06	2065.92	3484.82	1902.09	0	0	0	0	0	0	0
hsa-miR-135b-3p	0	0	0	0	0	0.682439	0	0	3.09252	0	0	0	0	0	0	0	0	0	0	2.83393	0	0	2.17809	1.48549	0	0	0	0	0	0	0	0	0	0	11.8927	8.29067	13.1061	13.2971	18.0278	14.8976	24.5194	12.6098	0	0	0	0	0	0	0
hsa-miR-135b-5p	0	0.330186	0.3059	0.186738	0	4.8975	0	1.01448	217.313	0	0	0	0	0	0	0	0	486.366	357.553	335.978	594.665	297.772	20.2251	11.3887	0	0	0	0	0	0	0	0	0	0	316.094	267.291	256.298	428.83	480.371	273.354	476.084	240.913	0	0	0	0	0	0	0
hsa-miR-136-3p	15.6075	3.56601	3.85434	5.10416	2.8785	92.3701	142.208	153.694	6.14865	0	0	0	0	0.440316	0	0	0	892.436	456.919	330.311	287.825	508.646	38.2722	20.0541	0	0	0	0	0	0	0	0	0	0	109.538	74.9477	107.762	59.0057	71.5564	77.6063	52.1037	62.0534	0	0	0	0	0	0	0
hsa-miR-136-5p	3.68511	10.3018	11.8077	13.1339	11.024	13.1671	16.7052	12.681	25.1767	0	0	0	0	0	0	0	0	235.536	178.777	115.876	101.992	133.631	106.415	75.2646	0	0	0	0	0	0	0	0	0	0	30.0446	15.9181	28.3966	17.4524	15.2543	20.7874	11.7489	7.3004	0	0	0	0	0	0	0
hsa-miR-137	0	0.132075	0	0	0.122489	1.2043	0	0	1.09148	0	0	0	0	0	0	0	0	23.7065	21.9907	11.6506	84.7052	45.5734	2.48925	3.71371	0	0	0	0	0	0	0	0	0	0	0	0	0	0	0	0	0	0	0	0	0	0	0	0	0
hsa-miR-138-1-3p	0	0	0	0	0	2.4889	0	0	2.40125	0	0	0	0	0	0	0	0	0	2.03618	4.09346	2.59302	3.86216	0	0.990324	0	0	0	0	0	0	0	0	0	0	38.1817	77.269	25.4842	86.4309	54.0834	77.2598	47.5063	46.1253	0	0	0	0	0	0	0
hsa-miR-138-2-3p	0	0	0	0	0	0	0	0	0	0	0	0	0	0	0	0	0	0	0	0	0	0	0	0	0	0	0	0	0	0	0	0	0	0	0	0	0	0	0	0	0	0	0	0	0	0	0	0	0
hsa-miR-138-5p	0	1.45282	1.8354	0.809196	1.71485	36.0087	2.14169	0	98.4148	0	0	0	0	0	0	0	0	42.06	52.9406	184.835	32.8449	57.1599	16.4913	39.1178	0	0	0	0	0	0	0	0	0	0	1507.24	2538.27	1223.97	4159.49	2103.7	3222.74	1641.27	1309.43	0	0	0	0	0	0	0
hsa-miR-139-3p	3.0348	127.32	161.76	116.338	171.73	1.76631	5.99672	9.13032	18.446	0	0.384063	0	0	0	0	0	0	7.64727	5.29406	8.81668	6.05037	5.79323	102.059	110.916	0	0	0	0	0	0	0	0	0	0	5.00743	2.98464	3.64059	5.81747	4.71496	2.07874	4.08656	3.98204	0	0	0	0	0	0.229645	0
hsa-miR-139-5p	100.582	218.848	287.913	187.547	247.122	51.7048	73.674	86.7381	70.3275	2.83201	3.07251	8.44461	8.22264	5.28379	6.72042	13.9606	7.168	309.714	390.946	456.893	274.86	424.065	663.073	580.577	0.80269	0.455605	0.671733	0.257069	0.515547	0.351436	0.615189	0.442836	0.651646	0.582911	157.108	148.237	158.002	203.611	137.843	136.85	229.869	188.815	0	0	1.8666	1.6974	1.64824	0.574112	0
hsa-miR-1-3p	670898	118166	88590	97281.3	85508.5	35.6474	0.856675	1.01448	1013.33	1.1328	0	0	0	0	0	0	0	40.5305	62.7143	65.4953	31.1162	87.2847	154.022	53.9726	0	0	0	0	0	0	0	0	0	0	8.76301	5.96928	8.00931	9.9728	5.54701	6.23622	5.61902	11.6143	0	0	0	0	0	0	0
hsa-miR-140-3p	419.453	20833.8	23804.8	22266.5	22691.9	969.144	428.337	373.836	6260.97	5443.68	4622.01	3800.08	6122.64	1909.21	6490.21	4504.78	5814.77	840.434	1264.47	1891.49	764.94	1164.83	2205.78	4166.54	840.416	876.47	846.652	782.176	803.429	759.541	742.709	728.613	708.176	705.468	1426.49	1462.14	2255.71	1527.5	1195.94	1346.33	1291.86	1793.91	153.117	26.6458	420.967	338.066	317.285	283.152	196.948
hsa-miR-140-5p	72.8352	13.2075	15.1726	15.0013	15.0049	26.294	15.4201	13.1882	1000.12	17.1808	13.2502	10.0422	9.19001	2.64189	9.72316	2.49296	3.03262	1419.33	1778.81	2083.26	1374.3	1625.19	1032.73	385.236	0.22934	0.569506	0.80608	0	0.309328	0.175718	0.439421	0.295224	0	0	58.8373	44.7696	79.365	40.7223	69.0603	56.8189	52.6145	57.4077	0	0	0	0	0	0	0
hsa-miR-141-3p	0	4.68865	1.77422	4.97967	1.16365	2171.8	75.3874	66.4485	2921.74	0	0	0.684698	0	0	0.285975	0	0	18675.4	15351.6	15135.1	19664.6	18570.8	1985.49	2979.14	0	0	0	0	0	0	0	0	0	0	16849.4	12637.6	8300.56	10248.7	15206.6	10516	13685.9	9733.1	0	0	0.49121	0	0	0	0
hsa-miR-141-5p	0	0	0	0	0	61.2188	0	1.01448	29.6154	0	0	0	0	0	0	0	0	188.123	212.17	159.96	196.205	211.26	28.9375	17.8258	0	0	0	0	0	0	0	0	0	0	137.704	111.427	118.683	149.592	187.766	119.874	147.116	75.6587	0	0	0	0	0	0	0
hsa-miR-142-3p	12.5727	12.415	19.3941	35.6669	14.9437	189.999	61.6806	58.3326	12744.5	319.639	316.276	301.495	284.568	242.834	315.431	100.716	208.423	614.84	378.729	925.122	396.731	522.936	435.618	269.368	22.59	25.1722	17.1964	8.31191	10.5172	17.3082	19.2466	15.3516	14.8249	19.3818	256.005	262.98	765.981	57.3436	56.5795	255.685	77.1338	54.0894	0	0	1.47363	1.9803	0	0.459289	0.514223
hsa-miR-142-5p	76.3035	341.611	442.331	586.978	348.849	3612.27	1727.06	1671.86	552.942	1640.68	1765.15	1517.52	1517.96	1215.49	1609.9	1078.45	2254.34	157.534	79.411	185.15	104.585	171.48	232.122	486.992	1304.71	1361.23	1322.11	509.254	689.905	1134.79	1216.93	1094.39	1017.22	994.738	2827.32	4657.7	9807.76	1038	826.227	3513.76	920.498	1575.89	3.05157	0.93494	39.6898	11.0331	34.613	8.84132	7.91904
hsa-miR-143-3p	9201.51	39586.3	38202.7	40233	29571.1	459247	71821.4	76563.3	291985	26.8097	14.9785	30.1267	21.927	7.48536	15.2997	7.47888	8.68431	14765.3	16773.6	21506.4	12806	19679.2	64816.6	28299.5	17.8885	21.2995	18.8085	9.59725	11.8576	18.4504	20.0376	17.123	16.1282	18.216	93103.8	106064	106387	114898	98099.5	60887.3	82007.6	129420	8.16744	1.98675	16.7994	8.7699	14.01	8.61167	3.49672
hsa-miR-143-5p	52.0251	580.402	760.895	630.613	238.119	457.555	19.7035	13.6955	170.998	0	0	0	0	0	0	0	0	64.237	83.8906	219.157	83.8408	122.43	1048.91	640.492	0	0	0	0	0	0	0	0	0	0	47.5706	67.3202	56.0652	53.1883	58.521	30.8346	38.3115	67.6947	0	0	0	0	0	0	0
hsa-miR-144-3p	169.732	82.5466	53.6548	73.9481	40.4214	15.6961	67.2489	74.5643	704.912	165.2	59.9139	147.895	41.2744	68.0288	56.9091	4.98592	1.92985	90.2377	256.966	104.541	168.546	264.944	284.708	163.403	1.94939	2.50583	3.22432	0.599828	0.721766	2.19647	2.1971	2.36179	1.4662	2.04019	253.501	408.233	710.644	334.089	232.42	915.685	323.349	163.264	1.07703	0	19.6484	4.2435	11.9497	12.286	8.22757
hsa-miR-144-5p	117.707	196.857	191.004	176.778	163.217	18.9076	57.3972	64.4195	4225.4	1130.54	938.65	934.613	650.233	200.123	557.509	30.9127	86.981	29.0596	93.257	31.4881	56.182	92.3055	45.1176	49.021	74.6501	78.2502	78.8615	48.329	53.72	59.217	63.9796	59.6352	60.766	50.2761	349.268	577.362	771.078	345.724	273.468	1000.57	415.297	701.171	4.84661	0.584338	15.9152	11.8818	18.5427	8.49685	21.3917
hsa-miR-145-3p	108.169	215.149	185.131	225.828	183.244	467.39	206.03	224.707	136.908	1.5104	0	2.96703	2.09597	1.76126	0	0	0.689231	176.652	225.201	228.289	165.089	264.944	451.798	328.292	0	0	0	0	0	0	0	0	0	0	208.434	255.684	206.786	196.132	236.025	162.835	219.142	260.16	0	0	0	0	0	0	0
hsa-miR-145-5p	270.097	16627.1	15448.8	16959.5	13119.5	12102.6	239.869	220.649	2257.97	66.4578	39.9426	94.7166	61.4279	42.2703	58.7679	41.3831	58.7225	1446.1	2021.93	4304.43	1888.58	2399.94	3002.34	1661.27	2.75208	2.05022	5.7769	3.42759	3.60883	3.4265	2.90018	3.09985	1.95494	1.74873	1094.75	1820.96	2199.65	2802.36	1236.15	986.015	1816.99	1598.79	0.269256	0	0.98242	0	1.23618	0.344467	0
hsa-miR-1468-3p	0	0	0	0	0	0	0	0	0	0	0	0	0	0	0	0	0	4.58836	0	0	0	0	0	0	0	0	0	0	0	0	0	0	0	0	0	0	0	0	0	0	0	0	0	0	0	0	0	0	0
hsa-miR-1468-5p	1.30063	0.594335	0.6118	0.684704	0.489957	14.3312	65.1073	61.3761	0.545739	1.5104	0.960158	1.3694	0.483685	0.99071	0.857926	1.99437	1.24062	19.1182	24.4341	22.3566	33.7092	16.2211	14.9355	7.17985	3.4401	3.07533	3.22432	2.485	2.57774	2.72363	2.98806	2.21418	3.42114	3.06028	32.5483	32.4994	32.7654	32.4116	32.7274	27.3701	21.4544	31.5245	1.88479	0.233735	2.35781	2.2632	1.85427	2.75574	2.36543
hsa-miR-1469	0	0	0	0	0	0	0	0	0	0	0	0	0	0	0	0	0	0	0	0	0	0	0	0	0	0	0	0	0	0	0	0	0	0	0	0	0	0	0	0	0	0	0	0	0	0	0	0	0
hsa-miR-146a-3p	0	0	0	0.248983	0	4.21506	0	0	4.98441	0	0	0	0	0.770552	0.57195	0	0.413539	7.64727	4.07236	10.0762	0	0	3.73387	6.4371	0	0	0	0	0	0	0	0	0	0	7.51115	0	8.73743	0	0	0	0	0	0	0	0	0	0	0	0
hsa-miR-146a-5p	29.9145	49.1317	60.507	93.182	46.4234	1047.3	1963.07	1846.86	1209.68	52.4865	58.1856	66.1875	100.445	35.3353	90.5111	87.2536	98.9736	211.829	188.143	203.728	168.546	197.356	1239.64	1684.54	27.0621	24.7166	26.0632	16.7095	20.725	20.2076	22.762	20.3704	20.3639	22.8793	731.085	726.594	1306.25	254.306	320.063	324.63	319.773	595.315	5.65438	0	45.7808	36.4941	31.1105	3.21502	6.99344
hsa-miR-146b-3p	0	2.04716	6.79098	11.5155	4.59335	34.4832	79.2424	87.7525	19.8649	2.07681	1.72828	2.05409	2.41842	1.76126	1.71585	2.99155	4.68677	6.88254	8.14472	19.8375	0	6.17945	7.15658	19.8065	1.83472	2.39193	2.14955	1.02828	1.34042	1.31788	2.37287	1.77134	1.4662	1.60301	73.2337	43.4431	135.43	32.4116	17.7504	38.8031	41.3764	55.7485	2.78232	1.40241	10.7084	6.2238	9.0653	7.34863	5.86215
hsa-miR-146b-5p	31.4319	254.111	838.41	1137.73	791.464	1074	24787.9	23601.9	20553.6	80.2402	51.4645	80.5662	151.071	35.6656	90.6541	41.3831	100.628	2152.71	6284.06	5389.51	1726.95	2413.46	544.212	531.556	27.8648	26.9946	25.7945	28.1062	29.9017	27.1484	26.3652	24.0607	26.3917	25.7938	2465.53	1872.03	4326.48	816.107	523.361	1216.76	1255.6	2652.04	11.8473	0.350603	49.7105	45.5469	53.5677	10.4488	10.2845
hsa-miR-1470	0	0	0	0	0	0	0	0	0	0	0	0	0	0	0	0	0	0	0	0	0	0	0	0	0	0	0	0	0	0	0	0	0	0	0	0	0	0	0	0	0	0	0	0	0	0	0	0	0
hsa-miR-1471	0	0	0	0	0	0	0	0	0	0	0	0	0	0	0	0	0	0	0	0	0	0	0	0	0	0	0	0	0	0	0	0	0	0	0	0	0	0	0	0	0	0	0	0	0	0	0	0	0
hsa-miR-147a	0	0	0	0	0	0	0	0	0	0	0	0	0	0	0	0	0	0	0	0	0	0	0	0	0	0	0	0	0	0	0	0	0	0	0	0	0	0	0	0	0	0	0	0	0	0	0	0	0
hsa-miR-147b	1.30063	0	0	0	0	50.3801	0	2.02896	1.16424	0	0	0	0	0	0	0	0	0	0	8.5018	9.50772	4.24837	9.95699	8.17017	0	0	0	0	0	0	0	0	0	0	5.00743	2.65301	2.18436	0	2.2188	2.77165	4.08656	1.32735	0	0	0	0	0	0	0
hsa-miR-148a-3p	614.547	368.092	326.701	456.449	255.206	16340.2	78628.2	70950.2	12693.9	301.137	243.688	268.858	266.671	46.8936	209.048	67.8085	130.54	106867	98331.6	69066.1	119731	85966.2	5756.07	8315.5	157.557	171.08	153.693	131.191	156.829	168.162	171.726	167.687	163.563	167.296	27399.4	17864.7	20243.9	18843.6	26113.4	15762.7	26797.6	24051.5	6.82116	1.75301	53.8366	39.606	46.3566	43.0584	16.558
hsa-miR-148a-5p	12.356	0.396224	0.48944	0.809196	0.489957	206.538	747.02	795.86	47.0427	5.66401	3.26454	3.65172	4.99807	2.86205	6.57743	4.98592	6.06523	1488.92	2585.13	1408.15	1678.55	1869.28	61.92	79.2259	6.19218	8.31479	6.98602	5.8269	6.70211	6.41371	6.76708	8.41388	9.77469	6.84921	353.024	332.29	275.957	329.102	417.135	323.59	337.141	240.581	1.16678	0	1.08066	0	1.03015	5.39665	3.49672
hsa-miR-148b-3p	156.292	165.159	130.436	165.512	117.345	430.659	1139.81	1039.84	1566.71	377.79	278.638	288.714	419.677	169.301	322.294	74.7888	134.814	855.729	789.63	640.784	777.04	947.387	915.109	1315.4	45.9826	51.5973	44.4687	32.305	33.6137	37.6915	42.5359	35.5745	35.026	39.055	1178	1273.45	1084.9	1332.2	1843.83	1237.2	1811.88	1425.24	14.6296	3.9735	90.0879	238.202	155.346	32.4947	13.9869
hsa-miR-148b-5p	3.25157	1.98112	1.59068	1.4939	0.979914	46.3657	34.6953	38.043	70.7277	7.17442	7.10517	6.61875	7.25527	1.43103	5.43353	0.997183	3.03262	42.8247	59.4564	46.6024	38.8952	56.0012	2.8004	9.1605	4.12812	3.18924	2.68693	2.74207	1.85597	2.02076	2.90018	3.24746	3.09532	2.47737	59.4633	67.3202	52.4246	59.0057	86.256	74.4882	74.0689	57.0759	0	0	0.687694	0.5658	0	0.344467	0
hsa-miR-149-3p	0	1.38678	1.2236	0	0.428712	0	0	0	0	0	0	0	0	0	0	0	0	0	0	0	0	0	42.9395	57.6864	0	0	0	0	0	0	0	0	0	0	0	0	0	0	0	0	0	0	0	0	0	0	0	0	0
hsa-miR-149-5p	7.80377	1.45282	2.26366	1.80513	1.22489	36.7313	7.28173	5.0724	12.2609	0	0	0	0	0.550394	0	0	0.689231	33.648	72.0807	103.596	30.2519	64.8842	588.084	972.746	0	0	0	0	0	0	0	0	0	0	35.052	31.1729	57.5214	54.8504	37.7197	31.874	49.5496	53.7575	0	0	0	0	0	0	0
hsa-miR-150-3p	1.73417	3.03771	5.87328	3.05005	4.77708	4.49607	0.856675	1.52172	3.82017	0	0.576095	0	0.644913	0	0	3.49014	1.92985	0	0	1.57441	0	0	13.6909	17.8258	0.91736	1.59462	1.20912	0.342759	0.515547	0.87859	0.790957	0	0.977469	0	8.76301	8.95392	18.9311	5.81747	2.2188	4.15748	4.08656	3.98204	0.448761	0	2.16132	0	1.23618	1.95198	2.05689
hsa-miR-150-5p	110.77	55.2732	69.8675	77.0604	73.7997	740.085	87.3808	93.8394	218.768	1560.81	1469.23	1737.76	2284.6	924.883	2029.14	3296.69	6440.86	324.244	504.158	1392.09	295.604	586.661	475.135	910.108	244.132	263.568	260.229	180.72	181.37	192.938	193.521	178.463	189.955	177.934	940.771	1398.14	3342.79	487.005	297.597	749.732	381.583	389.576	30.426	10.1675	222.027	128.154	201.703	93.8098	84.8469
hsa-miR-151a-3p	392.356	156.508	191.065	200.681	154.03	1753.03	3167.98	3073.87	2014.1	237.889	141.719	214.767	298.595	140.351	247.083	325.58	325.593	2776.72	4062.58	3895.4	2626.73	3573.27	1097.45	1498.61	642.61	670.651	641.774	595.201	655.054	754.269	736.733	712.966	686.509	716.981	5277.83	5265.9	5062.61	6156.54	5877.61	4943.93	6048.62	5827.05	50.9792	21.6205	191.965	117.969	144.633	140.313	73.4311
hsa-miR-151b/151a-5p	34.0331	63.1977	56.4691	67.9725	58.1211	1181.06	2958.53	3014.53	735.292	545.822	420.357	619.652	795.5	350.931	619.851	765.338	1327.87	114.709	93.6642	182.316	128.786	165.686	1854.18	2072	317.636	358.675	330.358	146.958	193.949	278.777	278.768	244.888	225.795	238.411	4042.88	4372.83	3828.45	4373.07	4815.92	4101.01	4311.83	4393.52	36.2599	13.3229	172.022	65.9157	118.467	34.4467	43.6061
hsa-miR-152-3p	583.549	1480.03	1830.2	1406.51	1490.51	217.377	320.396	277.968	759.85	6.04162	3.84063	4.33642	12.0921	1.5411	5.7195	0	11.3034	1502.69	1697.77	1250.39	987.075	1458.35	2991.76	3699.11	0	0	1.07477	0	0	0.790731	0	0	0	0	741.726	845.98	653.123	1039.66	890.573	711.622	940.42	1236.75	0	0	0	0	0	0	0
hsa-miR-152-5p	1.95094	1.25471	0	0.995934	0	7.54697	7.71007	10.652	0.727651	0	0	0	0	0	0	0	0	0	2.03618	3.4637	3.45735	3.47594	1.86693	3.46613	0	0	0	0	0	0	0	0	0	0	21.9075	16.2497	17.4749	19.1145	25.7936	22.1732	17.3679	15.2645	0	0	0	0	0	0	0
hsa-miR-153-3p	0	0.132075	0.24472	0.124492	0	10.0359	2.57002	1.01448	10.8056	0	0	0	0	0	0	0	0	164.416	152.713	142.326	207.441	261.468	0.933467	0	0	0	0	0	0	0	0	0	0	0	20.0297	7.95904	13.1061	14.1281	14.1449	12.126	12.7705	4.64571	0	0	0	0	0	0	0
hsa-miR-153-5p	0	0	0	0	0	0.361291	0	0	0.472973	0	0	0	0	0	0	0	0	7.64727	4.88683	2.20417	8.64339	9.65539	0	0	0	0	0	0	0	0	0	0	0	0	0	0	0	0	0	0	0	0	0	0	0	0	0	0	0
hsa-miR-1537-3p	0	0.198112	0.55062	0.933688	0.306223	0	0	0	0.218295	0	0	0	0	0	0	0	0	0	0.814472	0	0	0	1.55578	0	0	0	0	0	0	0	0	0	0	0	0	0	0	0	0	0	0	0.99551	0	0	0	0	0	0	0
hsa-miR-1537-5p	0	0	0	0	0	0	0	0	0	0	0	0	0	0	0	0	0	0	0	0	0	0	0	0	0	0	0	0	0	0	0	0	0	0	0	0	0	0	0	0	0	0	0	0	0	0	0	0	0
hsa-miR-1538	0	0	0	0	0	0.963443	0	0	0.218295	0	0	0	0	0	0	0	0	0	0	0	0	0	0	3.71371	0.34401	0.341704	0	0	0	0.527154	0	0	0.651646	0.437183	0	0	0	0	0	0	0	1.32735	0.718017	0	0.196484	0	0	0.918578	1.23414
hsa-miR-1539	0	0	0	0	0	0	0	0	0	0	0	0	0	0	0	0	0	0	0	0	0	0	0	0	0	0	0	0	0	0	0	0	0	0	0	0	0	0	0	0	0	0	0	0	0	0	0	0	0
hsa-miR-154-3p	0	1.0566	1.40714	1.68064	0.918669	0.240861	0	0	0.582121	0	0	0	0.322456	0	0	0	0	161.357	91.628	51.6405	65.6897	127.451	0	6.4371	0	0	0	0	0	0	0	0	0	0	0	0	0	0	0	0	0	0	0	0	0	0	0	0	0
hsa-miR-154-5p	1.5174	6.27354	9.60526	12.8226	11.6365	9.63443	1.71335	2.5362	1.38254	0	0	0	0	0	0	0	0	203.417	186.921	245.293	93.3486	134.789	21.1586	11.6363	0	0	0	0	0	0	0	0	0	0	3.75557	7.29579	11.6499	6.64853	4.16026	3.46457	5.1082	3.31837	0	0	0.294726	0	0	0	0
hsa-miR-155-3p	0	0.198112	0.12236	0.248983	0	0	0	0	0.291061	0	0	0	0	0	0	0	0	0	0	0	0	0	0	0	0	0	0	0	0	0	0	0	0	0	0	0	0	0	0	0	0	0	0	0	0	0	0	0	0
hsa-miR-155-5p	7.37023	12.349	22.5754	29.0066	19.3533	899.896	67.2489	62.8978	404.138	13.4048	12.4821	18.0304	18.2188	6.60473	12.2969	14.4592	20.2634	104.003	157.193	412.495	92.4842	142.127	136.597	161.918	4.24279	5.46726	5.37386	3.51328	3.50572	2.81149	4.04267	2.95224	4.2357	3.06028	444.41	485.833	1036.11	65.6543	63.7906	160.063	68.9607	167.577	1.79504	0	13.0662	5.658	9.0653	7.23381	2.77681
hsa-miR-1587	0	0	0	0	0	0	0	0	0	0	0	0	0	0	0	0	0	0	0	0	0	0	0	0	0	0	0	0	0	0	0	0	0	0	0	0	0	0	0	0	0	0	0	0	0	0	0	0	0
hsa-miR-15a-3p	0	0	0.24472	0	0	0.722582	0	0	2.87422	0	0	0	0	0	0	0	0	0	1.62894	2.83393	5.18603	2.31729	2.48925	0	0	0	0	0	0	0	0	0	0	0	0	0	0	0	1.6641	5.88976	0	0	0	0	0	0	0	0	0
hsa-miR-15a-5p	39.2356	141.056	167.083	212.445	162.911	278.114	214.169	227.244	806.056	273.005	178.205	235.764	156.069	36.6563	161.004	28.9183	35.4265	1543.22	1625.69	1726.81	1677.68	1677.72	1267.03	711.052	201.475	225.638	202.998	61.3539	87.5399	169.656	168.738	156.616	142.059	142.522	953.916	930.876	1600.41	626.624	808.2	1408.35	600.725	1082.12	50.9792	4.6747	519.504	99.298	248.472	121.252	133.492
hsa-miR-15b-3p	9.53794	2.97168	3.42608	5.35314	2.08232	10.357	14.1351	12.1738	58.394	73.2546	75.8525	102.705	73.0364	62.3047	90.2252	84.262	80.9157	25.236	21.1763	22.9863	20.7441	30.511	50.0961	17.5782	14.3337	15.4906	12.8973	8.48329	10.9296	16.5175	15.8191	15.9421	15.9653	12.2411	23.7853	40.7901	64.8026	39.8912	27.1804	44.3464	32.1817	34.511	1.07703	0.818073	25.0517	5.0922	8.85927	3.21502	2.05689
hsa-miR-15b-5p	46.3891	248.894	333.309	399.556	292.994	140.141	82.2408	67.9702	464.896	946.079	767.934	935.526	803.239	350.821	1174.64	404.358	415.331	1002.56	1232.7	1058.95	1016.46	1272.19	766.066	903.67	113.867	112.534	117.285	58.269	70.2175	88.1226	91.9268	71.0013	74.2876	78.5473	197.168	261.985	388.087	298.353	226.041	418.173	274.31	244.564	103.933	25.4771	526.774	296.196	430.19	143.413	153.753
hsa-miR-1-5p	2692.3	383.346	272.557	301.706	272.722	0.883156	0	0	3.56549	0	0	0	0	0	0	0	0	0	0	0	0	0	0	0	0	0	0	0	0	0	0	0	0	0	0	0	0	0	0	0	0	0	0	0	0	0	0	0	0
hsa-miR-16-1-3p	1.08386	0.132075	0.24472	0.373475	0	0.722582	0	0	7.45843	0	0	0	0	0	0	0	0	6.11781	2.85065	3.14881	6.91471	3.08972	4.66734	12.1315	0	0	0.268693	0	0	0	0	0	0	0	0	0	0	0	0	0	0	0	0	0	0	0	0	0	0
hsa-miR-16-2-3p	55.927	9.90559	12.1136	12.6359	10.8403	33.7205	21.4169	18.7679	47.4065	34.5505	21.8916	60.4817	19.0249	24.8778	18.5884	55.8423	64.6499	134.592	208.505	200.579	186.697	198.129	182.026	156.471	13.5311	14.6933	13.3003	5.74121	5.87724	12.0367	10.9855	9.44716	11.4038	9.61803	72.6078	93.5188	156.546	77.2892	59.353	194.362	92.9693	111.497	0.359008	0	5.5998	0	4.12059	1.26305	1.23414
hsa-miR-16-5p	441.78	1210.73	1689.36	1652.81	1654.03	4089.66	3225.38	3058.66	3702.22	9263.5	6329.36	9157.15	6728.86	2086.33	8128.7	1840.8	2500.67	12286.1	12360.4	12399.7	13074.8	13097.7	6110.17	3849.39	3061.23	3290.61	3170.71	1601.03	2013.01	2239.17	2240.25	2081.18	2078.26	1962.66	12070.4	12864.5	20010.9	9561.42	9730.85	18156.7	9741.34	14137.6	156.887	16.2446	4878.01	1069.08	2782.02	556.544	489.541
hsa-miR-17-3p	2.60126	21.264	21.2295	26.33	21.9868	28.1406	33.4103	24.8548	74.9117	27.9425	27.0765	31.4961	31.6007	6.71481	24.1649	9.47324	11.3034	117.768	126.243	217.268	130.515	167.231	204.741	371.124	10.3203	10.7067	11.5538	3.94173	6.599	9.57663	11.1613	8.7091	7.98266	7.43212	48.8225	41.785	61.8901	52.3572	44.0987	66.8661	41.8873	37.8294	1.61554	0.233735	13.7539	4.5264	4.53265	2.87056	5.34792
hsa-miR-17-5p/106a-5p	150.223	41.1412	64.8508	67.9102	51.2005	173.42	124.646	116.665	928.374	1149.23	952.285	950.361	827.262	178.218	675.759	173.011	348.889	565.133	608.41	849.235	642.204	721.064	2956.91	1421.11	22.8193	24.3749	24.7198	15.7669	16.6006	16.1661	18.5436	15.6469	17.5944	16.4672	225.334	267.954	359.691	330.765	209.954	350.268	265.627	253.523	5.20562	0.93494	34.7777	25.1781	19.7788	18.1419	12.3414
hsa-miR-181a-2-3p	83.2402	17.1037	17.1916	25.3341	17.6997	100.158	75.8157	78.115	64.1061	40.7809	43.7832	40.3972	44.1765	15.6312	46.328	25.9268	25.7772	30.5891	47.2393	46.2876	47.5386	33.987	161.179	182.962	38.8731	43.6242	48.0961	21.2511	27.4271	42.8752	40.954	40.4457	40.402	38.035	360.535	521.649	442.696	478.694	460.402	452.472	444.924	425.083	9.42397	5.60964	20.9255	7.6383	10.7135	12.7453	4.52517
hsa-miR-181a-3p	1.95094	3.63205	8.38166	10.3951	5.75699	66.3572	35.9803	37.5358	95.6862	13.0272	9.02548	9.58578	15.4779	5.94426	9.00822	1.49578	5.92739	20.6476	12.2171	28.9691	22.4728	25.4902	48.5403	52.2396	3.4401	5.01166	4.83648	3.08483	2.57774	5.00796	6.59131	4.72358	3.90987	3.49747	282.294	203.95	176.933	92.2484	197.474	254.646	213.523	121.12	0.269256	0	0.49121	0	0	0.688934	0.205689
hsa-miR-181a-5p	443.731	317.573	359.677	451.469	335.437	10473.3	7507.04	7221.07	3944.71	706.68	613.157	667.581	668.774	157.303	353.608	540.972	549.455	1698.46	2679.61	2683.1	2199.74	2224.6	4621.29	3905.59	2012	2120.61	2054.83	1531.7	1658.72	1996.86	1948.48	1868.03	1829.17	1834.28	58787.3	50854.3	38792	32250.4	56503	56498.1	48321	32985.5	5094.6	1114.33	7852.09	8382.05	7870.95	5357.38	7548.29
hsa-miR-181b-2-3p	1.30063	0	0.18354	0	0	0.562009	0	0	1.52807	0	0	0	0	0	0.285975	0	0	4.58836	5.29406	2.20417	0	2.70351	0	0	0	0	0	0	0	0	0	0	0	0	5.63336	3.97952	0	4.9864	3.05086	1.38583	2.5541	3.31837	0	0	0	0	0	0	0
hsa-miR-181b-3p	0	0	0.55062	0.248983	0.612446	0.762726	0	1.01448	6.62163	0	0	0	0	0	0	0	0	0	1.62894	0.944644	0	0	1.55578	0	0	0	0	0	0	0	0	0	0	0	10.6408	1.65813	4.36871	0	3.60556	3.81102	6.12984	2.98653	0	0	0	0	0	0	0
hsa-miR-181b-5p	88.226	211.319	227.773	279.671	226.483	601.791	242.011	227.244	623.161	25.1105	22.4677	31.9526	26.9251	9.79702	18.7314	24.431	23.7095	542.956	663.387	895.523	588.615	660.042	688.899	562.256	25.3421	29.0448	27.9441	21.7652	20.9312	24.8641	24.9591	24.356	23.4592	22.8793	3119.63	2972.04	1973.93	1994.56	3459.12	3133.35	2931.09	2040.79	31.862	3.27229	33.7953	29.4216	21.221	46.6179	37.8468
hsa-miR-181c-3p	1.30063	6.47165	5.75092	6.53582	5.51201	42.3112	11.1368	12.1738	13.789	2.07681	0.384063	0.684698	0.806141	0	1.42988	0	1.37846	19.8829	33.8006	48.8066	29.3875	38.2353	24.5813	24.0154	0.91736	0.797309	1.47781	0.685518	0.824876	0.966449	0.439421	1.77134	0.814557	2.04019	122.056	180.073	218.436	295.86	176.95	209.953	191.047	168.241	0	0	0	0	0	0	0
hsa-miR-181c-5p	1.5174	28.33	20.4341	20.3544	15.1274	603.878	153.773	130.868	125.738	6.79682	3.84063	7.75991	10.4798	2.75197	3.57469	1.99437	4.82462	240.889	320.495	399.27	262.759	329.442	62.5423	71.7985	10.3203	8.8843	8.32949	6.51242	8.97052	7.81945	9.13995	8.85672	11.2409	8.59794	2827.95	3418.08	3314.4	4364.76	4076.5	4316.5	3765.26	2971.26	0.628265	0.350603	2.75078	1.6974	2.0603	1.83716	0.925602
hsa-miR-181d-3p	0	0	0	0	0	0	0	0	0	0	0	0	0	0	0	0	0	0	0	0	0	0	0	0	0	0	0	0	0	0	0	0	0	0	0	0	0	0	0	0	0	0	0	0	0	0	0	0	0
hsa-miR-181d-5p	3.68511	218.583	189.964	165.636	210.191	80.4877	6.42506	12.681	92.7392	0.566401	0.576095	1.82586	1.61228	0.880631	1.1439	1.49578	0.964924	42.8247	42.3525	47.2322	57.0463	69.905	49.1626	54.2202	1.03203	0.91121	0.80608	0.342759	0.927985	0.87859	0.703073	0.73806	0	0.728639	190.282	269.281	272.316	350.71	335.317	239.401	275.332	214.035	0	0	1.57187	0	0	0.344467	0.411379
hsa-miR-182-3p	0	0	0	0	0	0.802869	0	0	0.254678	0.377601	0	0.456466	0.483685	0	0.285975	0	0	15.2945	12.6243	8.5018	11.2364	14.29	0	0	0	0	0	0	0	0	0	0	0	0	0	0	0	0	0	0	0	0.99551	0	0	0	0	0	0	0
hsa-miR-1825	0	0	0	0	0	0	0	0	0	0	0	0	0	0	0	0	0	0	0	0	0	0	0	0	0	0	0	0	0	0	0	0	0	0	0	0	0	0	0	0	0	0	0	0	0	0	0	0	0
hsa-miR-182-5p	37.7182	7.52825	7.89222	6.97154	6.06322	1377.04	247.151	229.78	888.899	1296.49	1595.4	1818.1	1496.52	638.788	1622.05	843.119	1672.07	1714.52	2721.15	1993.51	1968.96	2841	476.068	337.948	11005.4	10982.2	10958.7	12382.6	13057.1	12352.7	12391.1	12265.8	12313.3	12777.4	2596.35	2881.51	3176.78	2021.99	2393.26	3622.9	2336.49	4437.32	395.179	248.11	2978.5	1420.72	1960.58	2693.73	982.578
hsa-miR-1827	0	0	0	0	0	0	0	0	0	0	0	0	0	0	0	0	0	0	0	0	0	0	0	0	0	0	0	0	0	0	0	0	0	0	0	0	0	0	0	0	0	0	0	0	0	0	0	0	0
hsa-miR-183-3p	0	0.528298	0.24472	0	0.183734	2.68961	0	0	2.07381	10.1952	11.906	10.2705	7.25527	7.15513	10.5811	11.9662	13.0954	4.58836	2.85065	5.98275	5.18603	3.08972	5.91196	5.69436	1.72005	2.96143	2.68693	0.856898	0.721766	1.84504	1.93345	1.47612	1.30329	2.04019	0	1.65813	3.64059	1.66213	1.6641	0	3.06492	1.99102	0.359008	0	3.53671	2.5461	4.73868	3.55949	2.26258
hsa-miR-183-5p	15.6075	3.10375	3.79316	3.17454	2.57227	113.164	33.4103	31.9561	273.269	143.677	199.137	126.441	138.495	172.384	143.989	26.4254	91.392	755.55	1337.36	1269.6	919.656	613.696	267.594	197.57	87.4932	85.9955	87.594	54.7558	57.3288	62.7313	66.0889	62.1446	62.3951	60.1856	167.749	235.455	247.56	140.45	193.591	248.409	226.804	246.555	11.3088	4.20723	655.765	807.963	685.46	210.584	65.5121
hsa-miR-184	0	9.77352	18.5987	21.8483	15.6174	1.8466	0	0	146.44	0	0	0	0	0	0	0	0	9.17672	13.4388	29.9137	17.2868	18.5383	5.6008	0	0.22934	0	0	0	0	0	0	0	0	0	2.50372	1.32651	3.64059	6.64853	2.49616	0	0	1.65918	0	0	0.589452	0	0.824118	0.459289	0
hsa-miR-185-3p	2.81803	5.28298	5.01676	3.85924	1.46987	4.6165	3.85504	2.5362	5.09356	5.66401	4.60876	6.61875	4.83685	2.97213	4.43262	9.97183	7.71939	3.82363	3.25789	6.61251	0	3.08972	7.15658	17.3307	3.66944	5.69506	2.82128	2.74207	3.71194	3.95365	4.21844	3.24746	3.25823	3.35174	10.0149	4.64277	17.4749	9.14173	7.48847	14.5512	10.2164	5.64122	2.78232	0.818073	6.87694	4.8093	3.29647	7.92274	11.8271
hsa-miR-185-5p	144.153	2600.75	2860.23	2403	3021.99	19.6302	20.5602	22.8258	239.325	2608.47	2495.83	2245.81	2179.16	675.664	2222.74	1724.63	2648.16	262.301	430.448	469.803	350.921	473.5	215.631	544.183	69.9487	76.4277	66.7703	47.9863	60.4221	70.1115	68.989	63.7684	65.8162	66.0147	63.8448	125.023	92.4711	128.815	80.1543	84.8818	131.792	64.0445	39.5807	4.3241	41.5564	57.4287	19.1607	28.3611	22.4201
hsa-miR-186-3p	0	0.792447	1.2236	1.61839	0.918669	1.2043	0	0	10.7329	0	0	0	0	0	0	0	0	5.35309	0	3.14881	0	0	0	2.22823	0	0	0	0	0	0	0	0	0	0	0	1.65813	1.45624	3.32427	2.77351	0	0	2.65469	0	0	0	0	0	0	0
hsa-miR-186-5p	260.993	138.084	175.219	164.64	134.861	2702.62	3085.74	2955.18	1931.84	1758.68	1219.21	1826.77	2119.67	1348.47	1201.24	1172.69	1308.85	2619.19	3348.7	2403.17	2129.73	2930.6	1441.9	1300.05	1000.27	893.897	970.117	537.703	604.531	745.22	753.606	726.103	727.888	674.137	5655.9	6141.06	6313.52	6208.07	6612.04	6280.22	5714.55	5541.01	25.8486	8.88193	274.783	268.755	363.23	40.6471	52.0394
hsa-miR-187-3p	0	73.7636	63.8719	103.079	57.4474	10.9993	0	3.04344	5.82121	0	0	0	0	0	0	0	0	0	6.51577	7.24227	0	2.70351	22.0921	47.5355	0	0	0	0	0	0	0	0	0	0	0	1.65813	6.55307	6.64853	3.88291	2.77165	3.57574	2.65469	0	0	0	0	0	0	0
hsa-miR-187-5p	0	1.32075	1.34596	1.43165	1.6536	0	0	0	0.472973	0	0	0	0	0	0	0	0	0	0	0	0	0	0	0	0	0	0	0	0	0	0	0	0	0	0	0	0	0	0	0	0	0	0	0	0	0	0	0	0
hsa-miR-188-3p	0	0.330186	0	0	0	1.08387	0.856675	0	0.545739	0.377601	0.576095	0	0	0.550394	0.857926	0	0	5.35309	1.22171	7.55715	0	1.54486	0	3.46613	0	0	0	0	0	0	0	0	0	0	3.12965	2.32139	3.64059	2.4932	0.832052	5.19685	0	0	0	0	0	0	0	0	0
hsa-miR-188-5p	0.867086	1.91508	1.28478	1.30716	0	3.21148	0	0	9.71415	0.944002	0	0	0	0	0	0	0	24.4712	31.7644	48.8066	22.4728	31.6697	31.1156	18.0734	0	0.455605	0	0.17138	0	0	0	0	0	0	6.25929	9.28555	7.28119	9.14173	7.48847	10.7402	8.17312	4.31387	0	0	0.392968	0	0	0.688934	0.308534
hsa-miR-18a-3p	1.5174	1.65093	2.01894	1.05818	0.979914	8.06884	0	2.02896	2.47401	252.615	249.833	266.576	226.526	168.201	284.402	347.518	275.279	7.64727	7.33024	9.44644	12.9651	5.79323	23.0255	20.5492	41.1665	40.8906	34.3927	29.7344	30.8297	33.1228	31.6383	35.5745	29.3241	28.4169	8.13708	5.30603	6.55307	9.14173	4.71496	10.7402	5.1082	3.98204	10.4112	1.63615	17.2906	8.487	14.01	21.4718	18.2035
hsa-miR-18a-5p	2.16771	2.17923	2.93664	2.3031	1.1024	20.5936	9.85176	6.08688	115.551	46.8225	27.2685	44.0489	29.5048	6.2745	22.0201	3.49014	10.2006	354.068	404.792	537.188	346.6	407.457	141.887	89.6243	1.26137	1.82242	1.74651	0.257069	0.721766	0.966449	0.439421	0.590448	0.814557	0.728639	25.6631	47.4226	66.9869	61.4989	29.6765	74.4882	48.0171	21.5694	0.179504	0	1.37539	1.1316	1.85427	0.459289	0.822757
hsa-miR-18b-3p	0	0	0.48944	0	0	0.9233	0	0	0.545739	29.2641	31.3011	47.2442	23.2169	21.6855	58.1959	53.8479	46.3163	0	0	0	0	0	0	0	3.55477	2.61973	0	1.79949	1.85597	3.07506	3.25171	3.54269	3.25823	3.78892	0	0	0	0	0	0	0	0	1.88479	0	3.53671	0	0	3.21502	1.64551
hsa-miR-18b-5p	0	0.594335	0.48944	0.435721	0.306223	1.32473	0	0	6.69439	4.72001	2.11235	4.10819	2.25719	0	1.1439	0	0	8.41199	7.33024	7.87203	6.05037	9.26917	7.15658	3.21855	0.34401	0	0	0	0	0	0	0	0	0	3.12965	1.98976	3.64059	3.32427	2.49616	4.50393	1.02164	0.663673	0	0	0.196484	0	0	0	0
hsa-miR-1908-3p	0	0	0	0	0	0	0	0	0	0	0	0	0	0	0	0	0	0	0	0	0	0	0	0	0	0	0	0	0	0	0	0	0	0	0	0	0	0	0	0	0	0	0	0	0	0	0	0	0
hsa-miR-1908-5p	0	0.924522	0	0.74695	0.367468	0	2.14169	2.5362	0.618504	0	0	0	0	0	0	0	0	0	0	3.14881	0	0	0	0	0	0	0	0	0	0	0.351537	0	0	0	0	0	0	0	0	0	0	0	0.448761	0	2.06308	1.6974	1.85427	1.26305	1.23414
hsa-miR-1909-3p	0	0	0	0	0	0	0	0	0	0	0	0	0	0	0	0	0	0	0	0	0	0	0	0	0	0	0	0	0	0	0	0	0	0	0	0	0	0	0	0	0	0	0	0	0	0	0	0	0
hsa-miR-1909-5p	0	0	0	0	0	0	0	0	0	0	0	0	0	0	0	0	0	0	0	0	0	0	0	0	0	0	0	0	0	0	0	0	0	0	0	0	0	0	0	0	0	0	0	0	0	0	0	0	0
hsa-miR-190a-3p	0	0.330186	0	0.497967	0.306223	1.5656	0.856675	0	5.45739	0	0	0	0	0.770552	0	0	0	13.7651	6.51577	3.4637	17.2868	12.7451	0	0	0	0	0	0	0	0	0	0	0	0	5.63336	1.98976	3.64059	9.14173	5.82436	3.11811	4.08656	4.97755	0	0	0	0	0	0	0
hsa-miR-190a-5p	7.37023	1.58489	0.48944	1.24492	0.612446	22.0388	11.5651	14.2027	143.129	19.4464	11.3299	36.0608	6.2879	1.43103	5.14755	0	1.37846	328.068	190.586	127.212	244.608	341.415	22.4032	31.4428	0.57335	0.455605	0	0.257069	0.515547	0.263577	0.527305	0.73806	0	0.291456	123.308	74.9477	77.9087	53.1883	140.339	72.063	78.1555	102.869	0	0	0.687694	0	0.412059	0.459289	0.308534
hsa-miR-190b	9.32117	0.264149	0.67298	0.809196	0.734935	2.36846	0	0	4.03847	0.755202	0.576095	0	0.483685	0	0	0	0	203.417	327.418	87.8519	152.124	178.432	7.46774	7.17985	0	0	0	0	0.515547	0	0	0	0.325823	0	3.75557	2.32139	0	4.15533	3.32821	0.692913	4.08656	2.98653	1.88479	0.350603	3.7332	4.8093	1.44221	4.01878	1.95405
hsa-miR-1910-3p	0	0	0.24472	0.248983	0	0	0	0	0	0	0	0	0	0	0	0	0	0	0	0	0	0	0	0	0	0	0	0	0	0	0	0	0	0	0	0	0	0	0	0	0	0	0	0	0	0	0	0	0
hsa-miR-1910-5p	0	0	0	0	0	0	0	0	0	0	0	0	0	0	0	0	0	0	0	0	0	0	0	0	0	0	0	0	0	0	0	0	0	0	0	0	0	0	0	0	0	0	0	0	0	0	0	0	0
hsa-miR-1911-3p	0	0	0	0	0	0	0	0	0	0	0	0	0	0	0	0	0	0	0	0	0	0	0	0	0	0	0	0	0	0	0	0	0	0	0	0	0	0	0	0	0	0	0	0	0	0	0	0	0
hsa-miR-1911-5p	0	0	0	0	0	0	0	0	0.836799	0	0	0	0	0	0	0	0	0	0	0	0	0	0	0	0	0	0	0	0	0	0	0	0	0	0	0	0	0	0	0	0	0	0	0	0	0	0	0	0
hsa-miR-1912	0	0.198112	0	0.124492	0	0	0	0	0	0	0	0	0	0	0	0	0	0	0	0	0	0	0	0	0	0	0	0	0	0	0	0	0	0	0	0	0	0	0	0	0	0	0	0	0	0	0	0	0
hsa-miR-1913	0	0	0	0	0	0	0	0	0	0	0	0	0	0	0	0	0	0	0	0	0	0	0	0	0	0	0	0	0	0	0	0	0	0	0	0	0	0	0	0	0	0	0	0	0	0	0	0	0
hsa-miR-191-3p	0	0.396224	0.9177	0.622459	0.79618	5.90109	2.57002	2.5362	1.89189	1.888	1.53625	1.59763	2.09597	1.76126	1.00091	0	1.792	3.05891	4.07236	5.66787	1.72868	5.0208	3.73387	5.94194	1.03203	0	1.07477	0.257069	0.618657	0.351436	0	0	0	0.291456	0	2.65301	2.18436	5.81747	3.60556	0	2.04328	1.65918	0	0	0.589452	0	0	0	0.205689
hsa-miR-1914-3p	0	0	0	0	0	0	0	0	0	0	0	0	0	0	0	0	0	0	0	0	0	0	8.09005	0	0	0	0	0	0	0	0	0	0	0	0	0	0	0	0	0	0	0	0	0	0	0	0	0	0
hsa-miR-1914-5p	0	0	0	0	0	0	0	0	0	0	0	0	0.322456	0	0	0	0	0	0	0	0	0	0	0	0	0	0	0	0	0	0	0	0	0	0	0	0	0	0	0	0	0	0	0	0	0	0	0	0
hsa-miR-1915-3p	0	0	0	0	0	0	0	0	0	0	0	0	0	0	0	0	0	0	0	0	0	0	0	0	0	0	0	0	0	0	0	0	0	0	0	0	0	0	0	0	0	0	0	0	0	0	0	0	0
hsa-miR-1915-5p	0	0	0	0	0	0	0	0	0	0	0	0	0	0	0	0	0	0	0	0	0	0	0	0	0	0	0	0	0	0	0	0	0	0	0	0	0	0	0	0	0	0	0	0	0	0	0	0	0
hsa-miR-191-5p	676.977	3616.66	3710.5	5051.87	3367.11	8157.76	18333.7	17351.2	2065.4	16934.3	23628.5	30556.3	38360.2	22844.7	27084.7	53200.7	72974	2344.65	3166.67	3362.93	2441.76	2703.51	2780.49	4849.12	10012.4	10243.7	10355.6	7780.12	8410.84	8355.65	8385.11	7974	8136.12	7857.64	7404.74	10319.9	10299.2	11357.4	7855.96	8464.97	8984.31	9116.54	549.014	154.265	7181.88	8105.94	7662.44	1564.8	598.762
hsa-miR-192-3p	0	0	0	0	0.183734	26.4947	41.5487	37.0285	1.38254	1.3216	0.576095	1.59763	1.28983	0.550394	1.1439	0	0.413539	78.0021	105.474	83.4436	87.2982	103.506	1.55578	0	0	0	0	0	0	0	0	0	0	0	0	2.32139	2.91248	7.4796	1.38675	1.03937	3.06492	1.32735	0	0	0	0	0	0	0
hsa-miR-193a-3p	0	162.782	126.765	289.63	98.0526	25.6115	3.85504	3.04344	74.9481	4.72001	1.15219	2.51056	2.41842	1.21087	3.57469	0	2.06769	60.4134	39.5019	60.7721	44.0813	69.1326	184.204	104.479	0.22934	0	0	0	0	0	0	0.295224	0	0	105.782	62.3458	107.762	129.646	77.3808	164.913	98.5883	39.4885	0	0	0	0	0	0	0
hsa-miR-193a-5p	11.2721	76.5372	50.8406	65.5449	90.7033	10.6782	207.744	177.534	23.9397	4.15361	2.49641	6.84698	2.74088	3.96284	5.86249	4.48733	8.40862	25.236	56.6058	76.2013	31.9805	17.7659	985.119	892.282	0.34401	0.569506	0.671733	0	0.824876	0.263577	0.351537	0.590448	0.488734	0	120.178	136.962	105.577	89.7552	110.663	136.85	80.7096	114.815	0.628265	0	2.06308	0.8487	1.03015	2.75574	2.36543
hsa-miR-193b-3p	129.196	239.649	216.149	219.292	198.616	128.861	327.25	316.518	74.4024	2.45441	0.576095	1.82586	0.967369	0	2.71676	0	2.06769	309.714	436.557	883.557	412.29	425.996	2913.04	1817.74	0.22934	0	0	0	0.206219	0	0	0	0	0	154.604	124.36	117.227	574.267	75.4394	86.2677	370.855	226.313	0	0	0.294726	0	0.412059	0	0
hsa-miR-193b-5p	17.992	110.018	120.708	73.7613	126.899	2.16775	5.14005	8.11584	1.78275	0	0	0	0	0	0	0	0	28.2949	15.475	26.7649	26.7945	22.0143	199.762	184.448	0	0	0	0	0	0	0	0	0	0	5.00743	2.65301	3.64059	7.4796	2.77351	1.73228	5.61902	4.64571	0	0	0	0	0	0	0
hsa-miR-194-3p	0	0	0	0	0	38.2969	23.1302	29.4199	0	0.566401	0.384063	0	0	0	0.714938	0	0	14.5298	9.36642	13.8548	10.3721	11.2002	0	3.9613	0	0	0	0	0.206219	0	0.351537	0	0	0	0	0.99488	1.45624	0	2.49616	0	5.1082	0	0.269256	0	0	0	0	0	0
hsa-miR-194-5p	29.6977	3.30186	6.60744	5.85111	5.20579	5118.57	3643.44	3533.94	98.9606	597.553	326.838	366.998	429.189	176.677	499.17	207.414	233.787	4687.01	4845.7	4105.74	4074.49	4778.64	60.0531	90.8622	36.2357	37.1318	36.9453	18.6804	18.3535	22.8433	20.7407	22.5846	18.409	20.5476	95.7672	90.2025	98.2961	144.606	115.933	115.716	137.921	94.9052	1.16678	0	16.6029	5.658	7.41706	4.36325	5.7593
hsa-miR-195-3p	8.23731	0	0.55062	0.560213	0.489957	18.9477	17.9902	18.7679	7.78587	0	0	0	0	0	0	0	0	16.824	24.8414	40.3048	20.7441	38.2353	49.7849	47.5355	0	0	0	0	0	0	0	0	0	0	19.4038	18.2395	28.3966	18.2835	21.356	16.9764	19.922	28.5379	0	0	0	0	0	0	0
hsa-miR-195-5p	70.8843	316.913	253.04	401.486	259.555	783.279	314.4	298.257	747.953	0	0	8.44461	4.51439	3.08221	5.14755	0	4.82462	5171.85	3988.87	4693.62	5148.87	7863.73	1369.09	1531.54	0	0	0	0	0	0	0	0	0	0	1024.02	948.121	1149.7	895.89	955.75	936.126	1130.45	1094.73	0	0	0	0	0	0	0
hsa-miR-196a-3p	9.1044	0	0.18354	0.497967	0.122489	1.96703	0	0	0	0	0	0	0	0	0	0	0	0	0	0	0	0	108.593	63.3807	0	0	0	0	0	0	0	0	0	0	0	0	0	0	0	0	0	0	0	0	0	0	0	0	0
hsa-miR-196a-5p	173.851	8.78296	12.1136	14.441	15.1887	203.768	0	0	2.11019	0	0	0	0	0	0	0	0	3.82363	10.9954	15.7441	3.45735	9.26917	1116.43	1303.76	0	0	0	0	0	0	0	0	0	0	0	1.65813	3.64059	2.4932	0.832052	0	2.04328	1.99102	0	0	0	0	0	0	0
hsa-miR-196b-3p	0	3.10375	2.93664	3.61026	2.02107	1.04373	0	0	0	0	0	0	0	0	0	0	0	0	0	0	0	0	4.66734	2.97097	0	0	0	0	0	0	0	0	0	0	0	0	0	0	0	0	0	0	0	0	0	0	0	0	0
hsa-miR-196b-5p	51.3748	47.3487	44.9061	72.8277	50.1593	310.55	0	0	6.07589	13.216	5.76095	11.8681	6.44913	3.6326	3.86066	2.99155	1.51631	6.88254	1.62894	22.9863	0	3.47594	645.648	686.542	1.60538	1.70852	1.07477	1.19966	1.23731	1.58146	2.02133	0.590448	1.4662	1.31155	6.25929	5.96928	10.1937	6.64853	2.77351	10.0472	7.6623	2.32286	2.42331	0.46747	7.26991	6.2238	4.53265	3.78914	3.29103
hsa-miR-1972	0	0	0	0	0	2.97062	0	0	0.800417	0	0	0	0	0	0	0	0	5.35309	0	6.61251	0	5.0208	2.48925	0	0	0	0	0	0	0	0	0	0	0	28.7927	5.30603	0	13.2971	4.16026	14.5512	10.7272	0	0	0	0.687694	0	0	0	0
hsa-miR-1973	0	0	0	0	0	0	0	0	0	0	0	0	0	0	0	0	0	2.29418	0	1.25953	3.45735	2.31729	0	0	0	0	0	0	0	0	0	0	0	0	0	0	0	0	0	0	0	0.99551	0	0	0	0	0	0	0
hsa-miR-197-3p	58.3115	33.8111	38.7269	46.3109	39.809	67.7622	92.0925	91.3032	140.728	374.391	243.112	497.776	172.192	136.278	429.106	286.69	202.083	165.181	221.536	301.971	165.953	188.087	102.681	201.778	68.2286	76.9973	69.5915	63.6675	68.1553	71.6051	79.2715	76.6106	75.428	73.5925	321.728	300.785	390.272	476.201	213.837	292.409	308.535	259.828	58.0696	19.1663	57.2751	35.0796	52.3315	71.3047	47.1029
hsa-miR-197-5p	0	1.12263	2.38602	1.24492	1.28614	1.04373	0	0	0.472973	0	0	0	0	0	0	0	0	0	0	0	0	0	0	1.98065	0	0	0	0	0	0	0	0	0	0	0	0	0	0	0	0	0	0	0	0	0	0	0	0	1.33698
hsa-miR-1976	0	0	0.6118	1.05818	0.428712	1.48531	1.28501	0	4.47506	67.5906	55.3051	73.7192	46.2725	37.9772	72.9237	105.203	55.2763	0	0	2.20417	0	0	4.35618	2.72339	6.30685	5.46726	6.71733	5.14139	5.15547	5.79869	5.36093	5.31403	2.93241	6.99493	4.3815	2.65301	2.18436	8.31067	2.77351	3.11811	3.57574	3.6502	7.80843	3.73976	12.575	6.7896	11.5377	6.08558	12.3414
hsa-miR-198	0	0	0	0	0	0	0	0	0	0	0	0	0	0	0	0	0	0	0	0	0	0	0	0	0	0	0	0	0	0	0	0	0	0	0	0	0	0	0	0	0	0	0	0	0	0	0	0	0
hsa-miR-199a-3p	1032.48	18956.7	21721.1	21073.3	18148.1	3275.79	1528.31	1502.45	1356.16	10.7616	5.56892	8.67284	6.61036	2.64189	5.00457	0	0.964924	7423.97	6493.78	11667.9	4017.45	6810.14	19231.3	34018.4	0.45868	0.797309	0.40304	0	0.824876	0.615013	0.175768	0.295224	0.325823	0	5131.99	5374.34	6140.23	4491.08	4751.85	3967.27	4066.64	7340.89	1.88479	0	15.424	6.5067	9.27133	5.05218	2.46827
hsa-miR-199a-5p	282.453	59.4335	79.7175	103.453	65.2867	472.168	590.249	583.326	336.793	36.2497	37.0621	28.9856	57.8809	54.9294	56.7661	52.8507	38.5969	1979.88	1547.09	3720.32	1269.71	1826.03	9714.91	24431.5	2.63741	2.84753	3.08997	2.05655	3.09328	1.75718	1.84557	1.32851	1.95494	1.45728	918.864	1191.2	1448.96	934.119	729.709	957.259	793.815	980.909	0	0	0.294726	0	0	0	0
hsa-miR-199b-3p	142.852	1335.27	1583.52	1544.26	1323.07	423.594	277.134	280.504	150.915	2.45441	2.11235	0	0	0	0	0	0	881.73	755.83	1488.44	499.588	867.054	2722.92	4920.92	0	0	0	0	0	0	0	0	0	0	489.477	532.924	661.132	440.465	458.183	418.173	430.621	727.718	0	0	2.16132	1.1316	1.64824	0.459289	0
hsa-miR-199b-5p	293.942	113.782	112.999	189.912	121.203	437.484	39.8354	44.6371	162.157	9.25122	6.14501	10.2705	17.0902	6.16442	12.8689	5.9831	8.13293	1322.98	701.667	934.568	331.042	1228.94	3204.9	11225.1	0.80269	0.797309	0.80608	1.19966	0.515547	0.702872	0.263652	0.442836	0.814557	0.728639	853.141	970.008	1113.29	860.154	1011.5	697.417	796.88	1498.24	0	0	0	0	0	0	0
hsa-miR-19a-3p	12.1392	0.462261	1.46832	1.30716	0.918669	96.8261	38.122	36.014	122.937	97.9874	69.3234	114.573	47.8848	27.7399	50.4746	9.47324	9.09785	3569.74	3582.45	2751.43	4121.17	3893.05	99.881	92.8429	5.16015	0.797309	2.82128	1.37104	2.26841	0.87859	1.58191	1.03328	2.60658	2.04019	158.986	135.635	206.786	190.314	156.703	160.409	189.003	118.134	0	0	0	0	0	0	0
hsa-miR-19a-5p	0	0	0	0.311229	0	0.843013	1.28501	0	1.60083	0	0	0	0	0	0	0	0	0	0	0	0	0	0	0	0	0	0	0	0	0	0	0	0	0	0	0	2.91248	0	0	0	0	0	0	0	0	0	0	0	0
hsa-miR-19b-1-5p	0	0	0	0	0	1.08387	0	0	5.27547	0	0	0	0	0	0	0	0	6.88254	3.25789	8.5018	8.64339	8.88296	5.6008	0	0	0	0	0	0	0	0	0	0	0	0	0	0	2.4932	1.1094	0	2.04328	1.99102	0	0	0	0	0	0	0
hsa-miR-19b-2-5p	0	0	0	0	0	0	0	0	0	0	0	0	0	0	0	0	0	0	0	0	0	0	0	0	0	0	0	0	0	0	0	0	0	0	0	0	0	0	0	0	0	0	0	0	0	0	0	0	0
hsa-miR-19b-3p	59.1786	33.4149	38.1763	70.4623	30.2548	473.613	310.545	272.388	706.695	1149.79	1033.71	1201.19	1184.22	580.006	924.844	261.262	363.776	10999.1	9816.42	8635.62	12634	10308.9	1266.72	1225.53	70.7514	30.1838	66.2329	25.7926	37.9443	37.6036	38.1417	37.0506	30.7903	35.7033	1005.87	1128.19	1284.4	1614.76	1109.96	1014.08	1581.5	948.389	0.538513	0.584338	1.37539	3.3948	5.15074	1.60751	0.719913
hsa-miR-200a-3p	0.867086	55.2732	10.9512	23.7779	9.79914	630.654	60.3956	53.2602	371.684	0	0	0	0	0	0	0	0	16759.7	16690.6	14282.4	16068.1	15808.2	1072.55	590.728	0	0	0	0	0	0	0	0	0	0	1447.15	884.117	506.771	909.187	1573.13	682.173	1369	789.107	0	0	0	0	0	0	0
hsa-miR-200a-5p	0	0	0	0.435721	0	75.55	3.4267	0	6.62163	0	0	0	0	0	0	0	0	159.828	248.821	248.756	156.445	189.246	26.7594	30.7	0	0	0	0	0	0	0	0	0	0	53.204	36.1473	31.3091	46.5397	65.4547	38.8031	62.3201	29.5335	0	0	0	0	0	0	0
hsa-miR-200b-3p	1.73417	48.7355	15.4174	24.8361	13.9025	3160.42	238.156	294.199	890.1	0.377601	0.768126	0.684698	0.322456	0	0.857926	0	1.92985	15865.8	22957.9	20048.5	17549.5	19479.2	4434.9	3258.91	0	0	0	0	0	0	0	0	0	0	1532.27	1094.37	700.45	1528.33	1769.5	1217.79	1724.53	1111.32	0	0	0.196484	0	0	0	0
hsa-miR-200b-5p	0	14.7923	4.46614	11.8267	4.22588	31.3922	0.856675	1.01448	19.1372	0	0	0	0	0	0	0	0	93.2966	124.614	165.313	107.178	121.658	75.2997	85.663	0	0	0	0	0	0	0	0	0	0	13.1445	11.9386	21.8436	24.1009	16.9184	15.2441	27.0735	10.9506	0	0	0	0	0	0	0
hsa-miR-200c-3p	0	91.4616	32.6701	67.0388	35.9506	610.743	5.99672	6.08688	5276.35	6.23042	2.88047	5.24935	6.77158	2.0915	5.57652	3.98873	5.23816	28104.5	32766.6	33111.7	32831.9	27795.9	11986.7	9791.83	0	0	0.268693	0.257069	0.309328	0.263577	0.351537	0.295224	0.325823	0	2137.55	2029.56	1752.58	2335.3	2280.93	1855.62	2781.93	2123.42	0	0	0.49121	0	0.618089	0	0
hsa-miR-200c-5p	0	0.264149	0	0	0	1.92689	0	0	3.16528	0	0	0	0	0	0	0	0	22.1771	40.3163	50.0661	23.3371	36.6905	10.8905	7.17985	0	0	0	0	0	0	0	0	0	0	6.25929	3.31627	4.36871	4.15533	8.32052	4.15748	4.59738	3.31837	0	0	0	0	0	0	0
hsa-miR-202-3p	0	0.858485	1.10124	1.43165	0.79618	0	0	0	0	0	0	0	0	0	0	0	0	0	0	0	0	0	0	0	0	0	0	0	0	0	0	0	0	0	0	0	0	0	0	0	0	0	0	0	0	0	0	0.229645	0
hsa-miR-202-5p	0	11.3584	3.6708	29.38	4.16463	0.240861	0	0	0.509356	1.5104	0	0.456466	0	0.550394	0.428963	0	0	32.8832	9.36642	12.9101	8.64339	22.4005	0.933467	0	0	0	0	0	0	0	0	0	0	0	0	0.99488	0	0	0	0	0	0	0	0	0	0	0	0	0
hsa-miR-203a/203b-5p	0	0	0	0	0	0	0	0	12.079	0	0	0	0	0	0	0	0	8.41199	0	0	0	0	0	2631.29	0	0	0	0	0	0	0	0	0	0	0	0	0	0	0	0	0	0	0	0	0	0	0	0	0
hsa-miR-203a-3p	0.433543	22.6508	22.086	21.4748	19.0471	555.987	101.944	101.448	807.948	0	0	0	0	0	0	0	0	327.303	230.903	239.625	237.693	342.959	23596.5	41149.2	0	0	0	0	0	0	0	0	0	0	212.816	410.222	220.62	413.871	341.973	231.433	241.618	325.863	0	0	0	0	0	0	0
hsa-miR-203a-5p	0	0	0	0	0	1.44516	1.28501	0	6.4761	0	0	0	0	0	0	0	0	5.35309	0	4.40834	0	5.0208	144.376	70.5606	0	0	0	0	0	0	0	0	0	0	0	0	3.64059	0	1.94145	3.11811	0	0	0	0	0	0	0	0	0
hsa-miR-203b-3p	0	0	0	0	0	7.82798	0	0	8.62267	0	0	0	0	0	0	0	0	0	1.62894	1.25953	0	0	14.9355	10.3984	0	0	0	0	0	0	0	0	0	0	6.88522	4.9744	10.1937	9.14173	10.262	6.92913	5.61902	6.96857	0	0	0	0	0	0	0
hsa-miR-204-3p	0	4.62261	7.76986	4.4817	8.26802	0.361291	0	0	0	0	0	0	0	0	0	0	0	0	0	0	0	0	5.91196	2.22823	0	0	0	0	0	0	0	0	0	0	4.3815	2.32139	0	9.14173	1.94145	1.73228	0	2.65469	0	0	0	0	0	0	0
hsa-miR-204-5p	1.08386	21.0659	56.6527	61.9346	49.9756	35.527	104.086	100.434	3.20167	0.377601	0	0	0	0	0	0	0	165.946	182.849	327.477	301.654	188.087	46.9845	35.6517	0.80269	0.683408	0.940426	0.342759	0.515547	0.966449	0.790957	0.590448	0.651646	0.582911	1103.51	996.207	668.413	2248.87	739.417	1236.85	1722.49	526.293	0	0	0.589452	0	0	0	0
hsa-miR-2052	0	0	0	0	0	0	0	0	0	0	0	0	0	0	0	0	0	0	0	0	0	0	0	0	0	0	0	0	0	0	0	0	0	0	0	0	0	0	0	0	0	0	0	0	0	0	0	0	0
hsa-miR-2053	0	0	0	0	0	0	0	0	0	0	0	0	0	0	0	0	0	0	0	0	0	0	0	0	0	0	0	0	0	0	0	0	0	0	0	0	0	0	0	0	0	0	0	0	0	0	0	0	0
hsa-miR-205-3p	0	0.132075	0.12236	0	0	0	0	0	0	0	0	0	0	0	0	0	0	0	0	0	0	0	23.959	18.5686	0	0	0	0	0	0	0	0	0	0	0	0	0	0	0	0	0	0	0	0	0	0	0	0	0
hsa-miR-2054	0	0	0	0	0	0	0	0	0	0	0	0	0	0	0	0	0	0	0	0	0	0	0	0	0	0	0	0	0	0	0	0	0	0	0	0	0	0	0	0	0	0	0	0	0	0	0	0	0
hsa-miR-205-5p	0	184.442	84.4284	124.305	66.9403	0.843013	0	0	86.1175	0	0	0	0	0	0	0	0	2.29418	27.2848	134.139	15.5581	22.4005	148218	41372	0	0	0	0	0	0	0	0	0	0	37.5557	37.1422	318.188	103.052	41.0479	59.937	118.51	50.1073	0	0	0	0	0	0	0
hsa-miR-206	11816.9	109.028	103.272	139.991	97.1952	0	0	0	2.00104	0	0	0	0	0	0	0	0	0	1.62894	1.57441	0	0	0	0	0	0	0	0	0	0	0	0	0	0	0	0	0	0	0	0	0	0	0	0	0	0	0	0	0
hsa-miR-208a-3p	6.0696	0	0	0	0	0	0	0	0	0	0	0	0	0	0	0	0	0	0	0	0	0	0	0	0	0	0	0	0	0	0	0	0	0	0	0	0	0	0	0	0	0	0	0	0	0	0	0	0
hsa-miR-208a-5p	0	0	0	0	0	0	0	0	0	0	0	0	0	0	0	0	0	0	0	0	0	0	0	0	0	0	0	0	0	0	0	0	0	0	0	0	0	0	0	0	0	0	0	0	0	0	0	0	0
hsa-miR-208b-3p	103.617	0	0	0	0	0.963443	0	0	0	0	0	0	0	0	0	0	0	0	0	0	0	0	0	0	0	0	0	0	0	0	0	0	0	0	0	0	5.09683	0	0	2.77165	0	1.99102	0	0	0	0	0	0	0
hsa-miR-208b-5p	0	0	0	0	0	0	0	0	0	0	0	0	0	0	0	0	0	0	0	0	0	0	0	0	0	0	0	0	0	0	0	0	0	0	0	0	0	0	0	0	0	0	0	0	0	0	0	0	0
hsa-miR-20a-3p	1.30063	0.330186	0.42826	0.435721	0.367468	2.52904	0.856675	0	9.45947	1.1328	0	0.912931	0.483685	0.660473	0.714938	0	0	45.1189	32.1716	37.4709	50.1316	53.684	41.3837	13.3694	0	0	0	0	0	0	0	0	0	0	5.63336	5.30603	6.55307	4.9864	8.87522	6.92913	8.68394	4.97755	0	0	0	0	0	0	0
hsa-miR-20a-5p	457.604	12.8773	26.7356	28.8198	20.4557	125.448	167.48	181.085	1967.13	1041.8	726.263	892.618	722.786	137.378	456.416	98.2226	175.616	1797.11	2176.27	2717.11	2107.26	2387.2	2911.48	863.067	6.8802	7.40358	8.59818	5.31277	5.05236	5.71083	6.85496	4.13313	4.88734	5.53766	242.235	272.266	341.488	305.001	250.448	417.48	270.735	287.702	2.15405	0.818073	20.0414	12.1647	12.9799	13.0897	7.40482
hsa-miR-20b-3p	0	1.12263	1.71304	1.92962	2.02107	0.762726	0	0	0.472973	0	1.53625	2.05409	1.77351	0.550394	2.2878	0	0.827077	0	0	0	0	1.54486	0	0	0	0	0	0	0	0	0	0	0	0	0	0	0	0	0	0	0	0	0	0	0	0	0	0	0
hsa-miR-20b-5p	20.3765	1.58489	3.059	2.36534	2.93974	22.4402	1.71335	2.02896	84.9169	245.252	136.919	185.781	172.675	35.4454	126.83	36.3972	81.7428	35.9421	57.013	44.7132	43.2169	49.0494	51.0296	28.2242	2.98142	5.12556	4.83648	2.82776	2.78395	2.81149	3.07594	3.39507	2.44367	2.18592	15.0223	16.2497	29.1248	14.9592	7.76582	31.874	15.3246	11.2824	1.07703	1.05181	10.4137	9.61861	9.88942	5.62629	4.62801
hsa-miR-210-3p	25.7958	11.6886	10.0947	10.4573	12.1877	155.315	39.407	39.5647	86.2631	50.2209	40.9027	39.7125	32.5681	3.6326	30.3134	12.9634	21.7797	224.83	254.522	432.647	210.034	271.123	1725.36	1447.11	22.59	20.9578	22.0328	12.2536	15.1571	18.8018	18.192	18.7467	16.2911	14.5728	43.815	73.2895	83.7337	118.011	64.9	76.2204	66.4066	39.4885	9.87273	2.33735	19.059	11.316	16.6884	19.5198	15.221
hsa-miR-210-5p	1.5174	0	0	0.435721	0	3.73334	3.4267	7.10136	1.27339	6.41922	3.84063	5.47759	2.57965	0.99071	4.5756	1.49578	1.65415	0	0	3.4637	0	0	13.6909	3.46613	1.03203	1.59462	0.940426	0.685518	1.23731	1.05431	1.6698	1.77134	1.79203	0.582911	0	6.63254	5.09683	7.4796	3.05086	4.15748	3.57574	5.30938	2.60281	1.28554	2.65253	2.829	1.44221	2.41127	2.57112
hsa-miR-2110	5.41929	21.33	19.3329	17.4911	21.4969	3.81363	2.14169	0	2.98337	21.1457	16.3227	20.7692	13.5432	8.69623	20.0183	40.8845	32.1182	16.0593	24.0269	47.5471	22.4728	20.0832	55.3857	57.6864	2.2934	2.16412	1.61216	1.45673	1.44353	1.4936	1.31826	1.32851	1.62911	0.582911	6.25929	5.30603	6.55307	4.15533	7.21112	6.58267	7.15148	3.31837	5.11587	0.350603	11.5926	6.7896	9.47736	11.4822	6.78775
hsa-miR-2113	0	0	0	0	0	0	0	0	0	0	0	0	0	0	0	0	0	0	0	0	0	0	0	0	0	0	0	0	0	0	0	0	0	0	0	0	0	0	0	0	0	0	0	0	0	0	0	0	0
hsa-miR-211-3p	0	0	0	0	0	0	0	0	0	0	0	0	0	0	0	0	0	0	0	0	0	0	5.28965	7.17985	0	0	0	0	0	0	0	0	0	0	0	0	0	0	0	0	0	0	0	0	0	0	0	0	0
hsa-miR-2114-3p	0	0.132075	0.36708	0.435721	0.428712	0.682439	0	0	0	0	0	0	0	0	0	0	0	11.4709	18.7328	22.3566	16.4224	53.2977	0	0	0	0	0	0	0	0	0	0	0	0	3.12965	1.98976	0	4.15533	1.94145	3.11811	2.5541	0.99551	0	0	0	0	0	0	0
hsa-miR-2114-5p	0	0.528298	0.67298	1.4939	0.551201	0	0.856675	0	0.945947	0	0	0	0	0	0	0	0	32.8832	29.7282	48.8066	25.0658	86.5123	0	0	0	0	0	0	0	0	0	0	0	0	2.50372	2.32139	3.64059	0	0.554701	3.81102	2.04328	1.65918	0	0	0	0	0	0	0
hsa-miR-2115-3p	1.08386	0	0.48944	0.435721	0	0.963443	0	0	0	0.377601	0	0	0	0	0	0	0.413539	5.35309	4.88683	3.14881	0	0	0	0	0	0	0.40304	0	0.412438	0.351436	0.175768	0	0	0	0	0	0	0	1.6641	3.81102	0	0	0	0	0	0	0	0	0
hsa-miR-2115-5p	0	0	0.24472	0	0	0	0	0	0	0	0	0	0.322456	0	0	0	0	28.2949	19.9546	15.7441	21.6085	22.4005	0	0	0	0	0	0	0	0	0	0	0	0	0	0	0	0	0	0	0	0	0	0	0	0	0	0	0
hsa-miR-211-5p	0	0	0	0	0	0.642296	1.28501	2.5362	0.545739	0	0	0.684698	0	0	0	0	0	0	0	0	0	0	66.2762	143.102	0.34401	0.227803	0	0	0	0	0.175768	0.442836	0.488734	0	0	0.663254	0	0	0	0	0	0	0	0	0	0	0	0	0
hsa-miR-2116-3p	0	0.330186	0.24472	0.186738	0.367468	1.88674	0	0	0.618504	0	0	0	0	0	0	0	0.413539	0	0	2.20417	0	0	0	7.42743	0	0	0	0.17138	0	0	0	0	0	0	0	1.65813	0	0	1.1094	0	0	0	0	0	0	0	0	0	0
hsa-miR-2116-5p	0	0	0	0	0	0.963443	0	0	0	0	0	0	0	0	0	0	0	0	0	2.51905	0	1.93108	0.933467	3.71371	0	0	0	0	0	0	0	0	0	0	0	0	0	0	0	0	0	0	0	0	0	0	0	0	0
hsa-miR-2117	0	0	0	0	0	0	0	0	0	0	0	0	0	0	0	0	0	0	0	0	0	0	0	0	0	0	0	0	0	0	0	0	0	0	0	0	0	0	0	0	0	0	0	0	0	0	0	0	0
hsa-miR-212-3p	0	6.2075	7.09688	17.3666	7.77806	13.3276	2.57002	4.05792	3.31081	0	0	0	0	0	0.57195	0	0	15.2945	26.4703	93.2049	13.8294	25.104	4.35618	17.0831	0	0	0	0	0	0	0	0	0	0	12.5186	9.28555	21.8436	13.2971	8.32052	7.9685	6.64066	6.63673	0	0	0	0	0	0	0
hsa-miR-212-5p	0	1.84904	3.9767	5.10416	3.00099	2.20789	4.28337	2.5362	0.836799	0.377601	0	0	0	0.660473	0.428963	0	0	3.82363	8.14472	29.9137	6.05037	6.56566	5.28965	10.1508	0	0	0	0	0	0	0	0	0	0	6.88522	3.97952	5.82495	2.4932	3.05086	2.4252	6.12984	2.65469	0	0	0	0	0	0	0
hsa-miR-21-3p	1.95094	9.90559	14.0714	18.487	10.6566	683.081	2165.24	2130.41	63.0874	2.45441	1.72828	1.3694	3.54702	0.440316	1.42988	0	3.17046	48.1778	98.1438	175.704	41.4883	48.6632	58.4973	59.9146	7.68289	9.4538	9.00122	6.08397	5.98035	8.87376	7.99746	7.08537	7.00519	9.32658	396.839	551.495	764.525	391.432	258.213	419.905	257.964	166.25	3.59008	1.16868	16.7994	12.7305	9.27133	12.286	9.46171
hsa-miR-214-3p	19.5094	106.122	152.216	191.655	115.385	74.145	65.1073	57.8254	27.7599	0	0	0	0	0	0	0	0	1059.91	1417.99	3900.75	761.482	980.215	808.383	892.777	0	0	0	0	0	0	0	0	0	0	148.971	182.395	243.192	241.84	126.195	169.764	191.047	143.685	0	0	0	0	0	0	0
hsa-miR-214-5p	4.5522	1.51886	1.95776	2.3031	1.71485	23.4036	15.4201	23.8403	11.8607	0	0	0	0	0	0	0	0	165.946	182.034	502.551	93.3486	145.217	240.835	472.88	0	0	0	0	0	0	0	0	0	0	63.8448	51.7338	66.9869	51.5261	45.4855	50.2362	38.3115	60.0624	0	0	0	0	0	0	0
hsa-miR-215-3p	0	0	0	0	0	15.0538	0	0	0	0	0	0	0	0	0	0	0	0	5.29406	8.5018	0	0	0	0	0	0	0	0	0	0	0	0	0	0	0	0	0	0	0	0	0	0	0	0	0	0	0	0	0
hsa-miR-215-5p/192-5p	70.8843	629.269	683.564	799.175	737.752	87569	145973	140602	452.781	655.515	538.649	612.805	864.344	620.955	861.357	423.304	682.477	19243.6	22593.8	13433.2	17044.8	18953.5	87.7459	121.562	2170.01	2336.68	2294.37	1225.79	1534.78	2130.14	2232.34	2141.26	2058.87	2083.62	3464.52	4374.16	3813.16	5170.07	4173.02	3765.98	4371.6	2978.23	28.2719	8.9988	130.072	70.1592	108.372	61.5448	38.8753
hsa-miR-21-5p	2770.99	3522.16	2829.57	3581.69	2332.32	23457	21510.7	20848.6	107444	945.135	547.482	689.035	609.765	192.858	363.76	65.3155	140.327	62241.9	57094.5	55187.4	53772.2	47678.7	21654.3	27208.4	73.8474	72.4412	79.2645	49.443	54.7511	61.5891	61.431	58.0115	54.7382	52.7535	16374.3	14794.9	25369.1	10316	12282.7	9468.31	9909.91	11580.8	8.4367	1.75301	33.304	15.2766	22.6632	24.4572	19.5405
hsa-miR-216a-3p	0	0	0	0	0	1.12402	0	0	0.400208	0	0	0	0	0	0	0	0	1399.45	1477.45	1940.93	1541.98	1162.51	0	0	0	0	0	0	0	0	0	0	0	0	0	0	0	0	0	0	0	0	0	0	0	0	0	0	0
hsa-miR-216a-5p	0	0	0	0	0	1.24445	2.57002	0	6.69439	0	0	0	0	0	0	0	0	18212.7	12376.3	14729.2	20180.6	12472.8	0	0	0	0	0	0	0	0	0	0	0	0	0	0	0	0	0	1.73228	3.57574	0	0	0	0	0	0	0	0
hsa-miR-216b-3p	0	0	0	0	0	0	0	0	0	0	0	0	0	0	0	0	0	336.48	272.848	229.863	397.596	236.75	0	0	0	0	0	0	0	0	0	0	0	0	0	0	0	0	0	0	0	0	0	0	0	0	0	0	0
hsa-miR-216b-5p	0	0	0.12236	0	0	1.04373	2.57002	2.02896	1.60083	0	0	0	0	0	0	0	0	26871	24642.7	20839.5	31056.6	20803.1	0	1.98065	0	0	0	0	0	0	0	0	0	0	0	0	0	0	0	0	0	0	0	0	0	0	0	0	0
hsa-miR-217	0	0	0.24472	0.933688	0.183734	0.682439	1.71335	0	10.9512	0	0	0	0	0	0	0	0	45307.8	31795.7	29496.2	49146.3	29710.4	131.619	2825.89	0	0	0	0	0	0	0	0	0	0	0	0	0	0	1.94145	0	0	0	0	0	0	0	0	0	0
hsa-miR-218-1-3p	0	0.330186	0.6118	1.12043	0.489957	0	0	0	3.7474	0	0	0	0	0	0	0	0	0	0	0	0	0	2.8004	0	0	0	0	0	0	0	0	0	0	0	3.12965	3.31627	3.64059	0	1.38675	5.19685	3.57574	1.32735	0	0	0	0	0	0	0
hsa-miR-218-2-3p	0	0	0	3.05005	0	0	0	0	24.7401	0	0	0	0	0	0	0	0	0	0	0	0	0	0	0	0	0	0	0	0	0	0	0	0	0	0	37.8055	0	0	32.7274	0	0	0	0	0	0	0	0	0	0
hsa-miR-218-5p	24.0616	3.30186	4.5885	6.16234	4.34837	48.4933	12.4218	16.2317	535.297	0	0	0	0	0	0	0	0	1456.04	1607.77	1774.99	484.03	1951.55	109.527	227.527	0.45868	0	0	0	0	0.263577	0.527305	0.295224	0	0.582911	409.984	298.796	315.275	305.001	368.044	309.039	326.414	405.504	0	0	0	0	0	0	0
hsa-miR-219a-1-3p	0	0.924522	0.97888	0.560213	0.673691	3.17133	3.4267	3.04344	16.6632	0	0	0	0	0	0	0	0	0	0	5.35298	0	5.0208	0	0	0.57335	0.91121	1.34347	0.942588	0.721766	1.23003	0.878841	0	0.814557	1.16582	5.63336	4.64277	2.18436	4.9864	3.60556	5.5433	6.12984	3.31837	0.179504	0	0.589452	0	0	0.344467	0.205689
hsa-miR-219a-2-3p	0	0	0	0	0	0	0	0	0	0	0	0	0	0	0	0	0	0	0	0	0	0	0	0	0	0	0	0	0	0	0	0	0	0	0	0	0	0	0	0	0	0	0	0	0	0	0	0	0
hsa-miR-219a-5p	0	0.660373	0.79534	0.933688	0.551201	1.12402	1.28501	1.01448	1.27339	0	0	0	0	0	0	0	0	105.532	117.284	63.2912	61.368	130.155	3.42271	0	0	0	0	0	0	0	0	0	0	0.291456	4.3815	3.97952	5.09683	4.9864	2.49616	4.50393	5.1082	3.98204	0	0	0	0	0	0	0
hsa-miR-219b-3p	0	0.792447	0.6118	0.684704	0.918669	0.401435	0	0	0	0	0	0	0	0	0	0	0	0	0	0	0	0	0	0	0	0	0	0	0	0	0	0	0	0	0	0	1.45624	0	0	0	0	0	0	0	0	0	0	0	0
hsa-miR-219b-5p	0	0.198112	0.55062	0.684704	0.122489	2.28818	0	0	0.764034	0	0.960158	0	0.483685	0	0.428963	0.997183	0	0	2.44341	0	2.59302	0	4.35618	0	0	0	0	0	0	0	0	0	0	0	0	0	0	0	0	0	0	0	0	0	0	0	0	0	0
hsa-miR-221-3p	86.9253	5127.13	4940.47	3526.23	3998.41	1186.36	73.674	62.8978	713.608	191.632	116.755	172.087	198.472	41.83	78.7862	38.3916	157.145	717.313	1059.22	1839.54	883.354	1133.16	9460.38	12235.2	25.9154	29.8421	26.6006	14.3959	18.3535	23.8976	25.5743	22.8798	22.3189	23.3164	1052.81	1996.72	1191.93	723.028	629.308	1812.66	717.192	1109.66	14.8988	2.45422	61.4995	19.803	38.3215	18.8309	23.9628
hsa-miR-221-5p	4.76897	674.174	474.267	501.764	480.035	7.42654	3.4267	5.57964	64.1789	9.44002	11.5219	13.694	19.0249	7.92568	15.1567	3.98873	8.40862	34.4127	42.7598	52.2703	31.1162	35.1456	99.5699	29.2146	0	0	0	0	0	0	0	0	0	0	26.915	65.3305	28.3966	23.2699	24.1295	45.0393	22.4761	39.1567	0	0	0	0.5658	0.618089	0	0
hsa-miR-222-3p	44.6549	3253.79	2537.68	2308.95	2355.53	446.034	36.4087	39.0575	529.184	67.5906	58.1856	64.1334	85.6122	30.6019	57.052	37.3944	93.4597	733.373	923.611	1290.07	949.908	1231.26	11531.7	7536.86	12.499	9.79551	11.8225	10.2828	9.89851	10.9824	9.75514	8.11866	7.65684	9.90949	632.814	1193.52	815.493	485.343	415.749	1100.69	436.751	847.179	3.76959	0.93494	21.515	10.4673	16.2763	6.54487	5.65646
hsa-miR-222-5p	0	0.72641	0.48944	0.311229	0.551201	0.562009	0	0	8.84096	0	0	0	0	0	0	0	0	4.58836	4.88683	9.44644	2.59302	5.0208	10.2681	3.46613	0	0	0	0	0	0	0	0	0	0	0	5.30603	0	0	3.32821	5.19685	2.04328	0	0	0	0	0	0	0	0
hsa-miR-223-3p	11.0553	268.904	665.271	1039.94	600.81	68.1636	239.441	246.011	714.408	3650.46	2953.64	4989.62	6342.23	2482.39	3094.25	4242.52	3157.78	367.069	286.287	363.688	273.995	206.239	194.784	332.749	106.184	109.801	112.314	87.9177	96.7167	96.557	91.751	87.091	84.2252	90.497	87.0041	101.478	192.952	73.9649	54.9154	341.953	48.5279	117.138	5.20562	0.818073	30.0621	19.803	20.809	4.47807	3.18819
hsa-miR-223-5p	2.81803	5.21694	13.949	15.188	13.78	2.72976	1.28501	2.5362	7.85863	4.90881	0	5.02112	4.35316	0	0	3.49014	2.48123	7.64727	12.6243	14.4845	6.91471	5.40702	4.35618	6.68469	0	0	0	0.428449	0	0	0.263652	0	0	0	7.51115	1.65813	7.28119	0	2.2188	4.50393	0	4.31387	0	0	0.392968	0	0	0	0
hsa-miR-22-3p	11449.7	708.382	692.251	907.794	609.384	30965.9	72786.5	70665.6	1267.97	4834.8	3626.32	2599.57	4486.34	1642.49	5123.67	3787.3	3640.11	17463.3	20933.1	17133	18847.8	17931.2	13823.7	16892.2	3121.77	3229.67	3112.68	1806.77	2046.1	2522.87	2574.92	2483.28	2365.96	2198.74	42502.5	40761.6	39454.6	26335.7	40218.3	36218.9	33753.5	48245.4	113.447	23.0229	547.994	118.535	268.663	133.653	190.777
hsa-miR-224-3p	0	1.71697	2.1413	3.23678	1.95983	1.8466	0	0	6.11227	0	0	0	0	0	0	0	0	126.945	96.1076	214.119	94.2129	132.472	139.709	108.936	0	0	0	0	0	0	0	0	0	0	10.0149	6.63254	10.1937	4.15533	6.65641	6.23622	6.64066	4.64571	0	0	0	0	0	0	0
hsa-miR-224-5p	8.67086	7.06599	9.4829	6.16234	9.12545	36.651	29.5553	27.391	32.8898	1.3216	0	0.684698	0	0.550394	0	1.49578	0.275692	84.8846	134.795	169.721	99.3989	147.148	1651.93	1641.46	0	0	0	0	0	0	0	0	0	0	18.7779	25.5353	15.2905	29.0873	34.6688	22.8661	33.7141	42.1432	0	0	0.392968	0	0.824118	0.459289	0
hsa-miR-22-5p	120.525	23.2451	22.2083	36.1026	15.9236	23.6846	23.9869	23.333	115.515	13.7824	8.44939	8.90108	10.6411	4.73339	9.72316	11.9662	7.03016	1996.7	2780.61	2142.45	1806.47	2527.39	89.924	83.6824	1.72005	1.82242	1.20912	0.514139	0.618657	1.23003	0.790957	0.885672	0.325823	0	45.6928	56.7082	49.5121	34.0737	48.8137	47.1181	58.2335	44.4661	0.269256	0	0.49121	0	0	0.229645	0
hsa-miR-2276-3p	0	0	0	0	0	0	0	0	0.982329	0	0	0.456466	0	0	0	0	0	4.58836	2.03618	1.25953	0	0	0	0	0	0	0	0	0	0	0	0	0	0	0	0	0	0	0	4.50393	0	0.99551	0	0	0.294726	0	0	0.459289	0.617068
hsa-miR-2276-5p	0	0	0	0	0	0	0	0	0.254678	0	0	0	0	0	0	0	0	4.58836	0	1.88929	0	0	0	0	0	0	0	0	0	0	0	0	0	0	0	0	0	0	0	0	0	0	0	0	0	0	0	0	0
hsa-miR-2277-3p	0	0	0	1.18267	0	235.16	1.71335	0	6.58524	13.216	0	13.9222	15.1554	12.1087	20.7332	0	0.689231	0	0	2.83393	0	0	7.46774	0	0	0	0.268693	0	0	0	0	0	0	0	0	3.64789	0	6.64853	0	0	7.6623	0	0	0	2.35781	0	0	0.574112	1.23414
hsa-miR-2277-5p	1.08386	0	0	0	0	2.97062	1.71335	0	1.34616	2.07681	1.15219	0	0	0	0.857926	0	1.10277	0	0	0	0	0	3.42271	2.72339	0	0	0	0	0	0	0.175768	0	0	0	3.12965	6.63254	5.82495	0	4.16026	6.92913	4.08656	2.65469	0.448761	0	0.196484	0	0	0	0.308534
hsa-miR-2278	0	0	0	0	0	0.722582	0	0	0	0	0	0	0	0	0	0	0	0	0	0	0	2.70351	0	6.4371	0	0	0	0	0	0	0	0	0	0	0	0	0	0	0	0	0	0	0	0	0	0	0	0	0
hsa-miR-2355-3p	0.867086	0.990559	1.10124	1.36941	1.34738	0.963443	0	0	4.62059	0.566401	0	0	1.28983	0.330237	0.57195	0	0	0	3.25789	3.77858	4.32169	5.79323	10.2681	31.9379	0	0	0	0	0	0	0	0	0	0	0	1.65813	0	4.15533	0.554701	2.07874	4.59738	0	0	0	0.196484	0	0	0	0
hsa-miR-2355-5p	0	6.53769	5.26148	5.16641	4.71583	4.13478	2.57002	4.56516	0	0.755202	0	1.3694	0.483685	0.550394	1.1439	0	0	0	0.814472	0.944644	0	1.93108	4.35618	2.47581	0	0.227803	0	0.17138	0	0	0	0	0	0	6.25929	4.31115	5.09683	6.64853	4.71496	6.92913	9.70558	5.64122	0	0	0	0	0	0	0
hsa-miR-2392	0	0	0	0	0	0	0	0	0	0	0	0	0	0	0	0	0	0	0	0	0	0	0	0	0	0	0	0	0	0	0	0	0	0	0	0	0	0	0	0	0	0	0	0	0	0	0	0	0
hsa-miR-23a-3p	672.425	4754.95	4049.69	4894.77	3691.03	1035.06	260.429	279.997	3926.95	345.505	297.265	457.835	470.303	266.391	484.299	376.935	394.654	3026.02	4128.56	6640.53	3176.44	4068.39	8842.43	23656.4	26.3741	19.2493	25.2572	11.7395	14.3322	18.8897	16.8738	19.0419	12.3813	19.819	1315.08	1835.55	1715.45	1793.44	1539.3	1238.58	1824.65	1730.2	3.32083	0.818073	20.1396	14.9937	10.9196	6.77452	4.42232
hsa-miR-23a-5p	1.08386	4.82072	5.62856	3.797	3.9809	0.481722	2.14169	3.04344	2.58316	0	0	0	0	0	0	0	0.413539	0	1.62894	0	0	1.15865	38.2722	33.9186	0	0	0	0	0	0	0	0	0	0	0	10.6121	2.91248	6.64853	3.88291	7.27559	3.06492	13.9371	0.269256	0	0.687694	0	0	0	0.308534
hsa-miR-23b-3p	1637.92	6833.73	5802.13	5479.81	5483.41	3750.44	3968.97	3898.65	2185.54	107.427	88.7186	96.3142	106.733	67.8086	125.829	68.3071	101.455	9992.68	11326.9	12692.6	10006.4	10067.9	3793.3	11882.4	14.6778	16.2879	12.6286	4.62725	7.11455	11.1581	11.4249	10.4804	10.7522	6.99493	2948.13	3326.88	3898.35	4093.83	3456.34	3633.64	3553.78	3282.86	3.05157	0.93494	14.7363	12.4476	10.0954	7.34863	3.9081
hsa-miR-23b-5p	6.71991	250.017	250.226	204.166	260.473	1.60574	2.57002	4.05792	2.91061	0	0	0	0	0.330237	0	0	0.551385	8.41199	17.5111	13.8548	18.1511	13.1313	93.0356	47.7831	0	0	0	0	0	0	0	0	0	0	3.75557	0.99488	3.64059	0	1.1094	3.11811	5.61902	1.65918	0	0	0.294726	0	0	0	0.205689
hsa-miR-23c	0	0	0	4.35721	4.40961	1.64588	0	0	0.691269	0	0	0	0	0	0	0	0	9.17672	8.55195	15.4292	10.3721	0	0	78.2356	0	0	0	0	0	0	0	0	0	0	0	0	0	0	0	0	0	0	0	0	0	0	0	0	0
hsa-miR-24-1-5p	26.0126	3.30186	2.08012	4.35721	2.51103	4.41578	10.7084	9.13032	33.7266	0	0.960158	0.912931	0.483685	0	0	0	0	185.064	247.599	316.456	191.019	227.481	63.1646	56.4485	0	0	0	0	0	0	0	0	0	0	5.63336	7.29579	8.00931	9.14173	5.54701	9.35433	14.8138	8.95959	0	0	0	0	0	0	0
hsa-miR-24-2-5p	31.6486	6.7358	6.30154	7.03378	6.00197	34.965	10.2801	10.1448	89.7558	2.83201	2.30438	1.14116	1.45105	0.660473	2.57378	0	1.37846	135.357	201.582	291.895	126.193	185.383	135.042	341.167	0	0	0.537386	0.257069	0	0.439295	0.527305	0	0	0	30.6705	34.4892	40.0465	30.7495	31.618	22.8661	36.2682	37.8294	0	0	0	0	0	0	0
hsa-miR-24-3p	2400.96	3664.47	3396.53	3435.72	3386.89	910.293	1082.84	1046.94	33866	105.917	78.7329	117.312	168	71.221	119.395	92.7381	146.393	28193.2	29106.4	34937.7	30011.6	27532.9	40568.5	44160.5	8.60025	10.365	7.7921	3.51328	6.08346	7.64373	6.59131	9.15194	5.7019	6.2663	1237.46	1576.89	1474.44	1953.01	1308.26	1043.18	1984.03	1301.13	1.79504	0	7.17167	3.1119	5.97486	2.41127	1.95405
hsa-miR-2467-3p	0	0	0	0	0	0	0	0	0	0	0	0	0	0	0	0	0	0	0	0	0	0	0	0	0	0	0	0	0	0	0	0	0	0	0	0	0	0	0	0	0	0	0	0	0	0	0	0	0
hsa-miR-2467-5p	0	0	0	0	0	2.97062	5.56838	1.52172	0.363826	0	0	0	0	0	0	0	0	0	0	0	0	0	0	0	0	0	0	0	0	0	0	0	0	0	12.5186	5.96928	11.6499	8.31067	4.16026	5.5433	8.17312	6.30489	0	0	0	0	0	0	0
hsa-miR-25-3p	475.163	1494.75	2919.75	2295.44	2638.6	1650.26	1303.86	1303.1	554.798	4806.29	4119.08	5562.95	5107.22	2045.49	4846.14	3055.37	3238.56	1160.85	1609.4	1486.56	1164.26	1559.15	3101.91	2983.85	7158.04	7766.36	7789.55	5747.64	6459.19	7245.64	7636.25	7434.33	7480.57	7502.21	2605.12	3502.31	3927.47	4242.59	2762.41	3695.31	3557.35	3000.8	1989.8	435.799	7823.8	2711.88	4083.92	4161.5	1883.81
hsa-miR-25-5p	1.08386	21.0659	24.2273	22.533	22.1093	5.13836	2.57002	2.5362	0.14553	1.888	0.960158	0.912931	0.483685	0.770552	1.57286	0	2.61908	3.82363	1.62894	2.20417	0	3.08972	0.933467	2.97097	0	0.91121	0.268693	0.257069	0.309328	0.439295	0.263652	0	0.325823	0	5.00743	6.63254	5.82495	10.8039	5.54701	5.19685	7.6623	3.31837	1.61554	0	1.57187	0.5658	1.23618	2.29645	1.43983
hsa-miR-2681-3p	0	0	0.18354	0.124492	0	0	0	0	0.654886	0	0	0	0	0	0	0	0	3.82363	0	0	0	0	0	0	0	0	0	0	0	0	0	0	0	0	0	0	0	0	0	0	0	0	0	0	0	0	0	0	0
hsa-miR-2681-5p	0	0	0.24472	0	0	0	0	0	0.509356	0	0	0	0	0	0	0	0	0	0	0	0	0	0	0	0	0	0	0	0	0	0	0	0	0	0	0	0	0	0	2.77165	0	0	0	0	0	0	0	0	0
hsa-miR-2682-3p	0	0	0	0	0	0	0	0	0	0	0	0	0	0	0	0	0	0	0	0	0	0	0	0	0	0	0	0	0	0	0	0	0	0	0	0	0	0	0	0	0	0	0	0	0	0	0	0	0
hsa-miR-2682-5p	0	0	0	0	0	1.08387	0	0	0	0	0	0	0	0	0	0	0	0	0	0	0	2.70351	0	0	0	0	0	0	0	0	0	0	0	0	0	0	0	0	0	0	0	0	0	0	0	0	0	0	0
hsa-miR-26a-1-3p	0	0.594335	0.24472	0.311229	0	2.16775	0	0	1.16424	0	0	0	0.483685	0.440316	0	0	0.275692	5.35309	6.92301	5.35298	4.32169	6.17945	8.71236	5.1992	0	0	0	0	0	0.175718	0	0	0	0	2.50372	2.65301	2.91248	6.64853	2.2188	1.73228	3.57574	2.32286	0	0	0	0	0	0	0
hsa-miR-26a-2-3p	9.75471	0.594335	0.6118	0.995934	0.79618	8.5907	40.692	31.9561	18.264	0	0	0	0	0.440316	0	0	0	35.9421	26.8776	21.4119	16.4224	24.3316	37.6499	31.9379	0	0	0.80608	0	0.206219	0	0	0	0	0.437183	18.1519	19.566	23.2998	20.7767	19.6919	22.5197	22.9869	20.5739	0	0	0	0	0	0	0
hsa-miR-26a-5p	21250.8	3346.57	3543.61	4199.79	3479.67	66894.3	46625.8	44402.8	15356	2252.77	2193.77	2606.42	3676.32	1387.1	2958.84	1696.21	2965.49	48559.4	42780.9	40667.2	49001.1	47007.8	54124	47553.9	761.638	764.391	731.517	486.547	569.164	640.404	667.48	603.88	605.542	593.258	153364	107094	133727	141471	126220	162312	134645	102233	137.859	18.8157	1157.78	654.914	787.239	193.246	194.685
hsa-miR-26b-3p	7.15346	1.65093	1.04006	0.809196	1.34738	19.59	22.2735	13.6955	10.9875	9.81762	9.79361	14.8351	18.38	14.3103	17.0155	11.9662	8.40862	46.6483	78.5965	65.1804	59.6394	65.2704	49.4738	52.4872	6.76553	7.97309	7.92645	3.17052	2.47463	4.65653	4.83363	3.6903	3.74696	4.51756	62.5929	74.9477	107.033	99.728	81.5411	74.8346	80.7096	64.3763	0.807769	0	0.49121	1.6974	1.44221	1.49269	0.719913
hsa-miR-26b-5p	1867.49	3220.37	2779.47	4047.54	2703.64	3285.54	4898.46	4654.94	3406.61	249.405	200.673	358.782	237.973	79.1467	176.59	57.338	103.936	17140.6	16006	12242.3	16090.5	20377.1	8177.17	8964.16	92.3093	100.347	96.9983	56.9837	66.4025	83.9053	93.8602	78.8248	87.1576	75.6327	11962.8	9611.21	9512.87	10890.3	15693.3	10003.6	12970.7	11192.5	35.6316	2.45422	570.688	239.051	340.361	161.325	70.7571
hsa-miR-27a-3p/27b-3p	12662.5	1503.47	1109.13	1160.89	747.98	21957.2	107800	104853	11812.7	146.698	98.7042	123.702	136.238	52.9479	85.6496	36.3972	65.477	39640.4	36815.3	47349	39123.4	37974.3	51476.1	69512.3	106.987	108.89	102.641	38.5604	55.576	87.3318	90.257	81.1866	86.9947	79.1302	50913.1	38778.8	42833.1	43320.2	51501.8	41266.8	50025.6	46541.7	11.6678	4.3241	72.1096	35.3625	40.3818	24.6868	23.5514
hsa-miR-27a-5p	4.11866	4.09431	3.24254	1.99187	2.8785	8.75128	3.4267	5.57964	231.466	0.377601	0	0.684698	0.644913	0	0	0	0	27.5302	77.3748	50.381	40.6239	52.9115	191.361	169.345	0	0	0	0	0	0	0	0	0	0	19.4038	44.438	29.8529	34.9048	26.071	21.1338	18.3895	66.0355	0	0	0	0	0	0	0
hsa-miR-27b-5p	30.7815	32.6224	37.8704	35.7914	36.1956	59.3722	128.93	124.274	45.2235	0	0	0	0	0	0	0	0	42.8247	50.09	55.4191	51.8603	40.1664	183.893	128.742	0.45868	0.227803	0	0	0	0	0	0	0	0	56.3336	55.3817	56.7933	67.3164	78.7676	55.7795	72.0256	63.3808	0	0	0	0	0.412059	0	0
hsa-miR-28-3p	225.442	256.489	294.276	232.8	262.433	7644.16	2834.74	2792.86	417.963	20.7681	16.8988	56.3735	36.1151	27.7399	32.4582	33.4056	37.9077	197.299	332.304	416.273	264.488	354.16	418.505	662.774	153.084	142.832	148.722	156.898	163.532	161.924	162.498	153.516	163.237	156.22	2635.16	2570.11	3081.4	3109.85	2539.98	1963.02	2435.59	3180.32	24.9511	10.2843	61.4995	49.5075	53.1556	46.7327	20.5689
hsa-miR-28-5p	121.609	56.1317	57.6315	55.71	54.9364	1034.22	552.127	572.674	529.948	18.5024	12.4821	26.7032	43.8541	12.9893	23.593	16.4535	23.0203	768.55	952.524	1316.2	625.781	948.545	1130.12	724.174	5.38949	4.66995	4.0304	2.31362	2.37152	3.4265	3.3396	3.6903	2.28076	3.49747	364.917	313.056	386.631	344.062	332.543	279.937	320.795	420.437	0.718017	0	1.37539	0.5658	0.824118	0	0.925602
hsa-miR-2861	0	0	0	0	0	0	0	0	0	0	0	0	0	0	0	0	0	0	0	0	0	0	0	0	0	0	0	0	0	0	0	0	0	0	0	0	0	0	0	0	0	0	0	0	0	0	0	0	0
hsa-miR-2909	0	0	0	0	0	0	0	0	0	0	0	0	0	0	0	0	0	0	0	0	0	0	0	0	0	0	0	0	0	0	0	0	0	0	0	0	0	0	0	0	0	0	0	0	0	0	0	0	0
hsa-miR-296-3p	6.71991	0.990559	1.59068	0.560213	0.79618	2.72976	0	0	0.909564	0	0	0	0	0	0	0	0	6.11781	6.10854	8.5018	7.77905	9.26917	24.2702	33.4234	0	0	0	0	0	0	0	0	0	0	6.25929	6.30091	8.00931	11.6349	7.21112	8.31496	9.19476	9.29142	0	0	0	0	0	0	0
hsa-miR-296-5p	10.405	6.00939	4.64968	2.55208	3.18472	3.53263	0	0	2.91061	44.9345	32.6454	30.1267	25.9577	26.7492	14.2988	23.4338	43.5594	47.413	62.3071	162.164	56.182	67.2015	13.0685	7.92259	3.32543	3.18924	2.41824	1.88518	1.85597	3.77794	3.16383	2.65701	2.11785	1.45728	10.0149	10.2804	16.7467	29.9184	14.6996	14.2047	20.9436	6.63673	0.628265	0	3.24199	3.6777	3.09044	1.0334	0.514223
hsa-miR-297	0	0	0	0	0	0	0	0	0	0	0	0	0	0	0	0	0	0	0	0	0	0	0	0	0	0	0	0	0	0	0	0	0	0	0	0	0	0	0	0	0	0	0	0	0	0	0	0	0
hsa-miR-298	0	0	0	0	0	0	0	0	0	0	0	0	0	0	0	0	0	0	0	0	0	0	0	0	0	0	0	0	0	0	0	0	0	0	0	0	0	0	0	0	0	0	0	0	0	0	0	0	0
hsa-miR-299-3p	1.08386	1.71697	1.8354	1.61839	1.89858	10.4774	2.99836	1.52172	1.23701	0	0	0	0	0	0	0	0	57.3545	43.167	69.5888	22.4728	44.0286	13.3797	26.2436	0	0	0	0	0	0	0	0	0	0	3.75557	4.31115	2.18436	2.4932	1.94145	4.85039	3.57574	3.31837	0	0	0	0	0	0	0
hsa-miR-299-5p	1.95094	15.6508	12.909	24.7116	17.271	2.32832	2.14169	0	2.76508	0	0.768126	0	0.644913	0.220158	0.714938	0	0	87.9436	50.09	67.6995	40.6239	75.312	19.2917	39.3654	0	0	0	0	0	0	0	0	0	0	7.51115	1.65813	4.36871	4.15533	4.43761	3.81102	4.08656	0	0	0	0	0	0	0	0
hsa-miR-29a-3p	1765.39	13482.8	14287.7	13302.4	12246.1	1576.67	870.381	870.424	5377.56	73.821	49.7362	64.8181	95.6083	30.9322	71.9228	45.3718	57.7576	17290.5	17205.3	19521.4	15571.9	17847.8	16647.8	24599.6	7.10954	5.46726	6.17994	2.74207	3.91816	3.95365	5.88824	4.57597	4.2357	4.51756	6608.56	5568.68	5818.4	6381.76	6673.89	5988.15	6603.88	5556.27	1.07703	0	10.5119	3.9606	3.91456	1.60751	1.8512
hsa-miR-29a-5p	1.08386	5.08487	5.2003	5.66437	3.85841	3.21148	3.4267	2.02896	40.2027	0	0	0	0	0	0	0	0	34.4127	12.6243	22.3566	30.2519	26.6489	80.2782	10.646	0	0	0	0	0	0	0	0	0	0	21.2816	17.9078	21.1154	24.932	31.8953	13.8583	26.5627	14.6008	0	0	0	0	0	0	0
hsa-miR-29b-1-5p	0	0.528298	0.6118	0.995934	0.489957	0.682439	7.71007	6.08688	2.54678	0	0	0	0	0	0	0	0	3.82363	6.10854	9.76132	0	4.63459	21.4698	14.1121	0	0	0	0	0	0	0	0	0	0	5.63336	5.63766	1.45624	2.4932	5.26966	3.81102	3.57574	4.64571	0	0	0	0	0	0	0
hsa-miR-29b-2-5p	5.41929	4.68865	4.71086	4.23272	4.28712	3.61291	0.856675	1.52172	14.9169	16.048	9.98564	22.1386	15.6391	3.52252	10.7241	6.48169	11.5791	39.7658	55.7913	90.0561	55.3177	58.3185	49.1626	26.4912	0	0.569506	0	0	0	0.263577	0.175768	0.442836	0.325823	0	13.7704	11.9386	10.9218	12.466	14.4222	15.937	26.0518	14.9326	0.269256	0	1.08066	0	0	0.803756	0.411379
hsa-miR-29b-3p	64.1643	408.837	384.149	418.666	306.468	160.935	41.1204	53.7674	2490.86	30.7745	30.533	42.9078	46.7562	20.4747	45.0411	21.938	33.4966	2631.42	2625.04	2474.34	2924.06	2812.42	1432.56	895.005	1.49071	1.48072	2.0152	1.45673	1.34042	1.31788	1.23038	1.32851	0.977469	2.04019	461.31	364.126	389.544	308.326	462.343	458.708	493.452	200.429	0	0	0.196484	0	0.412059	0.344467	0
hsa-miR-29c-3p	89.0931	2795.89	2328.45	3017.12	1961.85	589.748	190.61	183.621	1728.06	33.0401	18.435	20.9974	23.2169	6.60473	16.0146	2.99155	9.2357	19155.6	16087.8	14064.5	19460.6	20019.9	3715.2	2134.4	1.72005	1.02511	3.08997	0.514139	1.1342	1.31788	1.23038	1.1809	1.79203	1.02009	2721.54	1817.98	2142.85	2088.47	2307.28	2698.55	2408.01	1838.04	0	0	1.27715	0.8487	0.618089	0.918578	0
hsa-miR-29c-5p	37.935	34.0092	40.1952	43.2609	32.3371	26.0933	26.1286	25.362	48.2433	10.9504	8.83345	14.8351	13.7044	6.16442	20.5902	9.47324	11.3034	851.141	1013.61	1581.02	947.315	1264.08	257.326	68.5799	2.06406	1.70852	3.08997	0.942588	1.44353	2.54791	1.84557	1.32851	1.79203	1.31155	74.4856	74.9477	96.8398	91.4173	76.5488	101.165	101.142	79.9726	0.179504	0	0.785936	0.8487	1.03015	0.229645	0
hsa-miR-300	0	0	0	0	0	0	0	0	0	0	0	0	0	0	0	0	0	0	0	0	0	0	0	0	0	0	0	0	0	0	0	0	0	0	0	0	0	0	0	0	0	0	0	0	0	0	0	0	0
hsa-miR-301a-3p	0	1.18867	0.79534	1.05818	0.551201	138.896	9.85176	10.1448	48.5707	0	0.960158	1.14116	0.483685	0	0.57195	0	0.275692	20.6476	16.6967	22.3566	25.0658	25.8764	21.4698	9.40808	0.91736	0.683408	1.34347	0.599828	0.412438	0.87859	0.966725	0.885672	0.325823	0.728639	230.968	278.566	297.073	231.037	427.675	256.724	283.505	216.026	0	0	0	0.8487	0	0.229645	0
hsa-miR-301a-5p	1.08386	3.69809	2.87546	3.29903	2.75601	0.802869	0	0	0.800417	0.944002	1.15219	0.912931	0	0	0.714938	0	0	3.82363	6.10854	4.40834	1.72868	6.95188	0	0.495162	0	0	0	0	0	0	0	0	0	0	5.00743	0.663254	2.18436	0	3.05086	3.46457	0	1.99102	0	0	0	0	0	0	0
hsa-miR-301b-3p	0	0	0	0	0	19.0681	2.99836	3.04344	3.71102	0	0	0	0	0	0	0	0	29.8243	28.5065	22.0417	17.2868	29.7386	1.86693	0	0	0	0	0	0	0	0	0	0	0	26.289	24.2088	18.9311	15.7903	26.6257	14.5512	26.5627	24.8877	0	0	0	0	0	0	0
hsa-miR-301b-5p	0	0	0	0	0	0	0	0	0	0	0	0	0	0	0	0	0	0	0	2.20417	0	3.08972	0	0	0	0	0	0	0	0	0	0	0	0	0	0	0	0	0	0	0	0	0	0	0	0	0	0	0
hsa-miR-302a-3p	0	0	0	0	0	0	0	0	0	0	0	0	0	0	0	0	0	0	0	0	0	0	0	0	0	0	0	0	0	0	0	0	0	0	0	0	0	0	0	0	0	0	0	0	0	0	0	0	0
hsa-miR-302a-5p	0.867086	0	0	0	0	0	0	0	0	0	0	0	0	0	0	0	0	0	0	0	0	0	0	0	0	0	0	0	0	0	0	0	0	0	0	0	0	0	0	0	0	0	0	0	0	0	0	0	0
hsa-miR-302b-3p	1.5174	0	0	0	0	0	0	0	0	0	0	0	0	0	0	0	0	0	0	0	0	0	0	0	0	0	0	0	0	0	0	0	0	0	0	0	0	0	0	0	0	0	0	0	0	0	0	0	0
hsa-miR-302b-5p	0	0	0	0	0	0	0	0	0	0	0	0	0	0	0	0	0	0	0	0	0	0	0	0	0	0	0	0	0	0	0	0	0	0	0	0	0	0	0	0	0	0	0	0	0	0	0	0	0
hsa-miR-302c-3p	0	0	0	0	0	0	0	49.7095	0	0	0	0	0	0	0	0	0	0	0	0	0	0	0	0	0	0	0	0	0	0	0	0	0	0	0	0	0	0	0	0	0	0	0	0	0	0	0	0	0
hsa-miR-302c-5p	0	0	0	0	0	0	0	0	0	0	0	0	0	0	0	0	0	0	0	0	0	0	0	0	0	0	0	0	0	0	0	0	0	0	0	0	0	0	0	0	0	0	0	0	0	0	0	0	0
hsa-miR-302d-3p	0	0	0	0	0	0	82.6691	0	0	0	0	0	0	0	0	0	0	0	0	0	0	0	0	0	0	0	0	0	0	0	0	0	0	0	0	0	0	0	0	0	0	0	0	0	0	0	0	0	0
hsa-miR-302d-5p	0	0	0	0	0	0	0	0	0	0	0	0	0	0	0	0	0	0	0	0	0	0	0	0	0	0	0	0	0	0	0	0	0	0	0	0	0	0	0	0	0	0	0	0	0	0	0	0	0
hsa-miR-302e	0	0	0	0	0	0	0	0	0	0	0	0	0	0	0	0	0	0	0	0	0	0	0	0	0	0	0	0	0	0	0	0	0	0	0	0	0	0	0	0	0	0	0	0	0	0	0	0	0
hsa-miR-302f	0	0	0	0	0	0	0	0	0	0	0	0	0	0	0	0	0	0	0	0	0	0	0	0	0	0	0	0	0	0	0	0	0	0	0	0	0	0	0	0	0	0	0	0	0	0	0	0	0
hsa-miR-3064-3p	0	0	0.36708	0	0	0.441578	0	0	0.618504	1.3216	2.11235	1.14116	1.77351	0.550394	2.00183	0	0	0	1.62894	0	0	2.31729	0	0	0	0	0	0	0	0.263577	0	0	0	0	5.63336	0	0	5.81747	1.1094	0	3.06492	0	0	0	0	0	0	0	0
hsa-miR-3064-5p	0	1.12263	1.04006	0.933688	0.918669	0.441578	0	1.01448	0.727651	0	0	0	0	0	0	0	0	0	0.814472	1.57441	0	0	2.8004	2.97097	0	0	0	0	0	0	0	0	0	0	0	0	0	0	1.1094	0	3.57574	1.32735	0	0	0	0	0.412059	0	0.308534
hsa-miR-30a-3p	396.041	555.109	610.515	606.835	537.728	189.638	207.744	187.679	2572.5	0	0	0	0	0	0	0	0	561.309	501.307	719.504	461.557	836.929	531.454	588.747	0	0	0	0	0	0	0.175768	0.295224	0	0	1947.27	2941.53	2114.46	2441.67	2693.91	2269.64	2423.84	2803.02	0.538513	0	0	0	0	0	0
hsa-miR-30a-5p	4789.78	2882.39	3431.83	3972.22	3006.13	4233.69	16083.2	15379	47748.2	10.384	9.02548	9.58578	8.06141	15.7413	11.582	21.938	21.9175	21906.4	23279.6	23391.9	17684.4	25323	3769.65	5498.03	3.09609	4.89775	4.16474	2.39931	2.88706	3.77794	2.72441	2.36179	2.44367	3.20601	58854.9	71652.6	52058.3	56415.3	62458	66040.9	54870.3	60121.1	28.2719	9.11567	5.10858	7.0725	4.32662	20.2087	9.77024
hsa-miR-30b-3p	9.32117	16.5754	26.0015	19.234	25.784	3.17133	5.56838	2.5362	9.31394	0	0	0	0	0	0	0	0	17.5887	15.8822	14.1697	17.2868	17.3797	17.7359	21.5395	0	0	0	0	0	0	0	0	0	0	13.7704	5.63766	9.46555	17.4524	12.2034	9.70078	8.17312	9.9551	0	0	0.294726	0	0	0.459289	0
hsa-miR-30b-5p/30c-5p	3726.3	436.308	490.786	702.133	415.973	1962.86	2459.51	2334.83	10493.2	4759.09	5387.64	5450.65	7316.05	4061.58	6658.36	6412.39	5438.86	20028.2	17159.7	12559	16768.2	20105.2	6554.19	5035.05	608.324	626.457	624.577	489.289	502.555	455.373	430.281	424.68	416.076	422.465	7289.57	8899.54	9253.66	10591.9	9898.09	9372.34	10914.2	10399.1	20.8225	3.50603	77.8077	85.4358	78.0852	56.2629	29.9278
hsa-miR-30c-1-3p	11.7057	6.2075	6.97452	6.84704	6.98188	15.3749	27.4136	21.8113	3.9657	0.944002	1.72828	2.73879	0.967369	0.99071	1.1439	2.99155	1.51631	9.94144	19.9546	17.3185	13.8294	24.7178	23.959	41.346	0.80269	0.341704	0.40304	0	0.206219	0.527154	0.527305	0.295224	0	0.582911	26.289	28.5199	24.0279	43.2155	39.1064	19.748	31.16	26.2151	0.448761	0.233735	0.49121	0	0.412059	0.918578	1.02845
hsa-miR-30c-2-3p	29.0474	97.1408	107.921	107.063	101.237	16.5793	13.7068	22.8258	130.177	0	0	0	0	0	0	0	0	61.1781	75.7459	93.8347	48.403	93.4642	89.6129	55.2106	0	0	0	0	0	0	0	0	0	0	137.704	209.92	195.864	218.571	200.524	178.425	185.939	207.398	0.179504	0	0	0	0	0	0
hsa-miR-30d-3p	13.2231	0	0.85652	0.74695	0	31.5528	66.3923	56.8109	46.8971	0	0	0	0	0	0	0	0	23.7065	21.1763	26.7649	21.6085	20.8556	32.049	40.3557	0.80269	0.227803	0.40304	0.428449	0.309328	0.615013	0.790957	1.03328	0.651646	1.16582	78.8671	109.768	78.6368	127.153	137.011	113.984	100.632	91.255	0	0	0.884178	0.5658	1.44221	0.229645	0
hsa-miR-30d-5p	6118.59	906.494	1122.22	1072.62	1018.62	6021.08	9008.36	8723.01	13464.4	5707.82	6070.5	5339.05	6851.07	2806.35	5293.83	5336.43	8385.05	10631.2	14123.3	13834.9	11460.3	14435.6	9470.65	10477.9	2085.16	2051.25	1994.11	1343.7	1438.27	1669.85	1633.85	1585.94	1489.83	1484.09	11943.4	13374.8	12799.6	16580.6	14282.2	13742.2	14775	16539.1	294.207	29.2169	1615.88	1366.69	1550.99	258.809	630.746
hsa-miR-30e-3p	460.206	103.546	124.318	98.0372	91.7444	426.364	502.868	458.545	982.111	27.7537	19.2032	26.9315	42.2418	19.3739	31.8862	15.9549	22.0554	302.832	327.418	274.262	196.205	454.576	586.218	727.393	34.057	44.0798	42.1848	28.6204	31.4484	39.0094	39.0206	38.0839	36.6551	35.9948	993.35	1076.46	1124.94	1142.72	1300.77	1116.98	1204.51	1180.34	3.59008	1.40241	18.0765	6.2238	7.41706	5.28183	1.43983
hsa-miR-30e-5p	1566.39	167.404	192.289	229.5	145.578	4567.77	4032.8	3835.75	12107.8	1627.46	1320.79	1406.14	1190.35	286.866	783.286	304.64	419.604	15266.2	17964.4	12292.7	10945.1	20224.2	1865.38	3422.56	150.218	146.705	147.11	134.79	134.042	126.781	113.986	112.628	108.01	110.462	6199.83	6137.42	7212.75	5502.49	6048.74	7243.71	5983.75	4754.55	12.5653	3.15542	65.7239	67.0473	87.5626	19.1753	34.6587
hsa-miR-3115	0	0	0	0	0	0.562009	0	0	0	0	0	0	0	0	0	0	0	0	0	0	0	0	0	0	0	0	0	0	0	0	0	0	0	0	0	0	0	0	0	0	0	0	0	0	0	0	0	0	0
hsa-miR-3116	1.5174	0.330186	0.3059	0.248983	0.183734	1.92689	1.28501	0	0.800417	0	0	0	0	0	0	0	0	0	1.62894	0	0	0	0	0	0	0	0	0	0	0	0	0	0	0	0	0	0	0	0	0	0	0	0	0	0	0	0	0	0
hsa-miR-3117-3p	1.5174	0	0.6118	0.186738	0.428712	1.00359	0	0	5.96674	0	0.384063	0.684698	0	0	0	0	0	0	2.03618	4.72322	0	1.93108	0	0	0	0	0	0	0	0	0	0	0	0	9.38894	2.98464	2.91248	8.31067	14.4222	2.4252	8.17312	3.6502	0	0	0	0	0	0	0
hsa-miR-3117-5p	0	0	0	0	0	0	0	0	0.109148	0	0	0	0	0	0	0	0	0	0	0	0	0	0	0	0	0	0	0	0	0	0	0	0	0	0	0	0	0	0	0	0	0	0	0	0	0	0	0	0
hsa-miR-3118	0	0	0	0	0	0	0	0	0	0	0	0	0	0	0	0	0	0	0	0	0	0	0	0	0	0	0	0	0	0	0	0	0	0	0	0	0	0	0	0	0	0	0	0	0	0	0	0	0
hsa-miR-3119	0	0	0	0	0	0	0	0	0	0	0	0	0	0	0	0	0	0	0	0	0	0	0	0	0	0	0	0	0	0	0	0	0	0	0	0	0	0	0	0	0	0	0	0	0	0	0	0	0
hsa-miR-3120-3p	0	0	0.9177	0.560213	0.734935	0.963443	0	0	0.727651	0	0	0	0	0	0	0	0	0	0	0	0	0	0	0	0	0	0	0.257069	0	0	0.263652	0	0	0	0	0	0	0	0	0	0	0	0	0	0	0	0	0	0
hsa-miR-3121-3p	0	0.264149	0.3059	0.248983	0.244978	0	0	0	0	0	0	0	0	0	0	0	0	0	0	0	0	2.70351	0	0	0	0	0	0	0	0	0	0	0	0	0	0	0	0	0	0	0	0	0	0	0	0	0	0	0
hsa-miR-3121-5p	0	0	0	0	0	0	0	0	0	0	0	0	0	0	0	0	0	0	0	0	0	0	0	0	0	0	0	0	0	0	0	0	0	0	0	0	0	0	0	0	0	0	0	0	0	0	0	0	0
hsa-miR-3122	0	0	0	0	0	0	0	0	0	0	0	0	0	0	0	0	0	0	0	0	0	0	0	0	0	0	0	0	0	0	0	0	0	0	0	0	0	0	0	0	0	0	0	0	0	0	0	0	0
hsa-miR-3123	0	0	0	0	0	0	0	0	0	0	0	0	0	0	0	0	0	0	0	0	0	0	0	0	0	0	0	0	0	0	0	0	0	0	0	0	0	0	0	0	0	0	0	0	0	0	0	0	0
hsa-miR-3124-3p	0	0	0	0	0	0	0	0	0	0	0	0	0	0	0	0	0	0	0	1.57441	0	0	0	0	0	0	0	0	0	0	0	0	0	0	0	0	0	1.66213	0	0	0	0	0	0	0	0	0	0	0
hsa-miR-3124-5p	1.73417	0.858485	0.97888	1.05818	0.734935	0.843013	0	0	0	0	0	0.684698	0	0.220158	0.428963	0	0.689231	0	0	0	0	0	0	0	0	0	0	0	0	0	0	0	0	0	0	0	0	0	0	0	0	0	0	0	0	0	0	0	0
hsa-miR-3125	0	0	0	0	0	0	0	0	0	0	0	0	0	0	0	0	0	0	0	0	0	0	0	0	0	0	0	0	0	0	0	0	0	0	0	0	0	0	0	0	0	0	0	0	0	0	0	0	0
hsa-miR-3126-3p	0	0	0	0	0	0	0	0	0.363826	0	0	0	0	0	0	0	0	0	0	0	0	0	0	0	0	0	0	0	0	0	0	0	0	0	0	0	0	0	0	0	0	0	0	0	0	0	0	0	0
hsa-miR-3126-5p	0	0.132075	0	0.435721	0.183734	0.602152	0	0	0	0	0	0	0	0	0	0	0	0	0	0	0	0	0.933467	0	0	0	0	0	0	0	0	0	0	0	0	0	0	0	0	0	0	0	0	0	0	0	0	0	0
hsa-miR-3127-3p	2.60126	0	0	0	0	0.802869	0	0	0	0	0	1.59763	0	0	1.00091	1.49578	0	0	0	0	0	0	0	4.20888	0.22934	0	0	0.342759	0.309328	0	0	0	0	0	0	0	0	0	0	0	0	0	0	0	0	0	0	0	0.514223
hsa-miR-3127-5p	0	1.0566	0.97888	0.995934	1.40863	2.40861	0	0	0.800417	0	0	1.14116	0	0	0	0	0	0	0	0	0	0	1.86693	0	0	0	0	0	0	0.263577	0	0.590448	0	0.437183	0	2.98464	5.09683	6.64853	4.99231	0	2.04328	2.32286	0	0	0.589452	0	0.412059	0.574112	1.02845
hsa-miR-3128	0	0.132075	0.3059	0.435721	0	0.200717	0	0	0.691269	0.377601	0	0	1.45105	0.440316	0.714938	0	0	0	0	0	0	0	0	0	0	0.227803	0	0	0	0.175718	0	0	0	0	0	0	0	0	0	0	0	0	0	0	0	0	0	0	0
hsa-miR-3129-3p	0	0	0	0	0	0.602152	0	0	0	0	0	0	0	0	0	0	0	2.29418	1.62894	1.57441	0	2.31729	2.17809	0	0	0	0	0	0	0	0.263652	0	0	0	0	2.32139	0	3.32427	0	3.81102	0	1.65918	0	0	0	0	0	0	0
hsa-miR-3129-5p	0	1.25471	0.67298	0.560213	0.918669	0.281004	0	0	0	0	0	0	0	0	0	0	0	0	0	0	0	0.772431	0	0	0	0	0	0	0	0	0	0	0	0	0	0	0	0	0	0	0	0	0	0	0	0	0	0	0
hsa-miR-3130-3p	0	0.264149	0.6118	0.684704	0.612446	0.843013	0	0	1.96466	0	0	0	1.28983	0	0	0	0.689231	0	1.62894	4.09346	0	3.08972	0	0	0	0	0	0	0	0	0	0	0	0	0	0	0	0	0	4.15748	0	0	0	0	0.392968	0	0	0	0
hsa-miR-3130-5p	0	0.396224	0	0.373475	0	1.44516	0	1.01448	0.727651	4.72001	2.30438	3.87996	3.06334	1.43103	2.43079	3.98873	1.65415	0	6.10854	9.76132	0	6.95188	0	4.95162	0.91736	1.13901	0.671733	0.428449	0.721766	1.31788	0.703073	0.73806	1.30329	1.02009	0	2.65301	0	0	1.6641	3.11811	0	0	0	0	0.294726	0	0	0	0.514223
hsa-miR-3131	0	0.528298	0	0	0	1.8466	0	0	0.727651	0	0	0	0	0	0	0	0	0	0	0	0	0	0	0	0	0	0	0	0	0	0	0	0	0	0	0	0	0	0	0	0	0	0	0	0	0	0	0	0
hsa-miR-3132	0	0	0	0	0	0	0	0	0	0	0	0	0	0	0	0	0	0	0	0	0	0	0	0	0	0	0	0	0	0	0	0	0	0	0	0	0	0	0	0	0	0	0	0	0	0	0	0	0
hsa-miR-3133	0	0	0	0	0	1.24445	0	0	1.20062	1.1328	0.768126	2.51056	1.28983	0.660473	2.57378	0	0.827077	6.11781	2.44341	1.25953	6.05037	3.86216	0	0	0.68802	0.455605	0.268693	0	0.309328	0.790731	0.175768	0	0.325823	0.874367	0	0	0	0	0	0	0	0	0	0	0	0	0	0	0
hsa-miR-3134	0	0	0	0	0.122489	0	0	0	0.400208	0	0	0	0	0	0	0	0	0	0	0	0	0	0	0	0	0	0	0	0	0	0	0	0	0	0	0	0	0	0	0	0	0	0	0	0	0	0	0	0
hsa-miR-3135a	0	1.32075	1.04006	0.74695	0.551201	0	0	0	0	0.377601	0.576095	0	0	0	0.714938	0	0.275692	0	0	0	0	0	0	0	0	0	0	0	0	0	0	0	0	0	0	0	0	0	0	0	0	0	0	0	0	0	0	0	0
hsa-miR-3135b	0	0	0	0	0	0	0	0	0	0	0	0	0	0	0	0	0	0	0	0	0	0	0	0	0	0	0	0	0	0	0	0	0	0	0	0	0	0	0	0	0	0	0	0	0	0	0	0	0
hsa-miR-3136-3p	0	0	0	0.124492	0	0	0	0	0	0.566401	0	0	0.644913	0	0.285975	0	0	0	0	0	0	0	0	0	0	0	0	0	0	0	0	0	0	0	0	0	0	0	0	0	0	0	0	0	0	0	0	0	0
hsa-miR-3136-5p	0	0	0.18354	0	0	0.521865	0	0	0.545739	0	0	0.456466	0	0	0	0	0	3.82363	0	1.25953	0	0	2.17809	0.990324	0	0	0	0	0	0	0	0	0	0	0	0	0	0	0	0	0	0	0	0	0.196484	0	0	0	0
hsa-miR-3137	0	0	0	0	0	0	0	0	0	0	0	0	0	0	0	0	0	0	0	0	0	0	0	0	0	0	0	0	0	0	0	0	0	0	0	0	0	0	0	0	0	0	0	0	0	0	0	0	0
hsa-miR-3138	0	4.02827	0	2.05411	1.6536	1.52545	0	0	0	0	0	0	0	0	0	0	0	0	0	0	0	0	0	0	0	0	0	0	0	0	0	0	0	0	0	0	0	0	0	0	0	0	0	0	0	0	0	0	0
hsa-miR-3139	0	0.198112	0	0	0	0	0	0	0	0	0	0	0	0	0.57195	0	0	0	0	0	0	0	0	0	0	0	0	0	0	0	0	0	0	0	0	0	0	0	0	0	0	0	0	0	0	0	0	0	0
hsa-miR-31-3p	0	5.01883	1.71304	12.4492	1.77609	0	0	0	2.43763	0	0	0	0	0	0	0	0	16.0593	5.29406	31.803	0	15.0624	0	0	0	0	0	0	0	0	0	0	0	0	7.51115	21.5557	12.378	6.64853	1.6641	12.126	8.17312	13.2735	0	0	0	0	0	0	0
hsa-miR-3140-3p	0	0.330186	0.42826	0	0.244978	1.12402	0	0	0.618504	0.566401	0	0.912931	1.28983	0	0	0	0	0	1.62894	0	0	0	0	0	0	0	0	0	0	0	0	0	0	0	0	0	0	0	0	0	0	0	0	0	0	0	0	0	0
hsa-miR-3140-5p	0	0	0	0	0	0	0	0	0	1.1328	0.768126	0.456466	1.28983	0.550394	0.714938	0	2.06769	0	0	0	0	0	0	0	0	0	0	0	0	0	0	0	0	0	0	0	0	0	0	0	0	0	0	0	0	0	0	0	0
hsa-miR-3141	0	0	0	2.11636	2.14356	0	0	0	0	0	0	0	0	0	0	0	0	0	0	0	0	0	0	0	0	0	0	0	0	0	0	0	0	0	0	0	0	0	0	0	0	0	0	0	0	0	0	0	0
hsa-miR-3142	0	0	0	0	0	0	0	0	0	0	0	0	0	0	0	0	0	0	0	0	0	0	0	0	0	0	0	0	0	0	0	0	0	0	0	0	0	0	0	0	0	0	0	0	0	0	0	0	0
hsa-miR-3143	1.95094	0.396224	0.12236	0.560213	0.673691	0	0	0	0.327443	0.566401	2.30438	0	2.25719	0.770552	1.57286	0	0.827077	0	0	0	0	0	0	0	0.22934	0	0	0	0.206219	0	0	0	0	0	0	0.99488	0	0	0	1.73228	0	0	0	0	0	0	0	0	0
hsa-miR-3144-3p	0	0	0.12236	0	0	9.79501	0	0	0	0	0	0	0	0	0	0	0	16.0593	5.7013	7.55715	12.9651	14.6762	0	0	0	0	0	0	0	0	0	0	0	0	0	0	0	0	0	0	0	0	0	0	0	0	0	0	0
hsa-miR-3144-5p	0	0.594335	0	0	0	0.642296	0	0	0	0	0	0	0	0	0	0	0	0	0	0	0	0	0	0	0	0	0	0	0	0	0	0	0	0	0	0	0	0	0	0	0	0	0	0	0	0	0	0	0
hsa-miR-3145-3p	0	0	0	0	0	0.562009	0	0	0.618504	0	0	0	0	0	0	0	0	0	0	0	0	0	0	0	0	0	0	0	0	0	0	0	0	0	0	0	0	0	0	0	0	0	0	0	0	0	0	0	0
hsa-miR-3145-5p	0	0	0	0	0	0.521865	0	0	0	0	0	0	0	0	0	0	0	0	0	0	0	0	0	0	0	0	0	0	0	0	0	0	0	0	0	0	0	0	0	0	0	0	0	0	0	0	0	0	0
hsa-miR-3146	0	0.330186	0	0	0	0	0	0	0.291061	0	0	0	0	0	0	0	0	0	0	0	0	0	1.55578	0	0	0	0	0	0	0	0	0	0	0	0	0	0	0	0	0	0	0	0	0	0	0	0	0	0
hsa-miR-3147	0	0	0	0	0	0	0	0	0	0	0	0	0	0	0	0	0	0	0	0	0	0	0	0	0	0	0	0	0	0	0	0	0	0	0	0	0	0	0	0	0	0	0	0	0	0	0	0	0
hsa-miR-3148	0	0	0	0	0	0	0	0	0	0	0	0	0	0	0	0	0	0	0	0	0	0	0	0	0	0	0	0	0	0	0	0	0	0	0	0	0	0	0	0	0	0	0	0	0	0	0	0	0
hsa-miR-3149	0	0.396224	0	0.373475	0	0	0	0	0.363826	0	0	0	0	0	0	0	0	0	0	0	0	0	0	0	0	0	0	0	0	0	0	0	0	0	0	0	0	0	0	0	0	0	0	0	0	0	0	0	0
hsa-miR-3150a-3p	0	0	0	0	0	0	0	0	0	0	0	0	0	0	0.428963	0	0	0	0	0	0	0	0	0	0.45868	0.455605	0	0	0.309328	0.527154	0.527305	0	0	0.291456	0	0	0	0	0	0	0	0	0	0	0	0	0	0	0
hsa-miR-3150b-3p	0	0.198112	0.55062	0	0.306223	1.92689	0	0	0	0	0.768126	0	0	0	0	1.99437	0	0	0	0	0	0	0	0	0.45868	0	0.268693	0	0	0.615013	0.527305	0.73806	0	0	3.12965	0	0	0	0	0	0	0	0	0	0.785936	0	0.824118	0	0.514223
hsa-miR-3150b-5p	0	0	0	0	0	0	0	0	0	0	0	0.684698	0	0	0	0	0	0	0	0	0	0	0	0	0	0	0	0	0	0	0	0	0	0	0	0	0	0	0	0	0	0	0	0	0	0	0	0	0
hsa-miR-3151-3p	0	0	0	0	0	0	0	0	0	0	0	0	0	0	0	0	0	0	0	0	0	0	0	0	0	0	0	0	0	0	0	0	0	0	0	0	0	0	0	0	0	0	0	0	0	0	0	0	0
hsa-miR-3151-5p	0	0.264149	0	0.311229	0	0	0	0	0	0	0	0	0	0	0	0	0	0	0	0	0	0	3.73387	0	0	0	0	0	0	0	0	0	0	0	0	0	0	0	0	0	0	0	0	0	0	0	0	0	0
hsa-miR-3152-3p	0	0	0.24472	0	0.183734	0	0	0	0	0	0	0	0	0	0	0	0	0	0	0	0	0	0	0	0	0	0	0	0	0	0	0	0	0	0	0	0	0	0	0	0	0	0	0	0	0	0	0	0
hsa-miR-3152-5p	0	0	0	0	0	1.00359	0	0	0	0	0	0	0	0	0	0	0	0	0	0	0	0	0	1.2379	0	0	0	0	0	0	0	0	0	0	4.3815	0	5.82495	0	1.94145	0	0	0	0	0	0	0	0	0	0
hsa-miR-3153	0	0	0	0	0	0	0	0	0	0	0	0	0	0	0	0	0	0	0	0	0	0	0	0	0	0	0	0	0	0	0	0	0	0	0	0	0	0	0	0	0	0	0	0	0	0	0	0	0
hsa-miR-3154	0	1.98112	3.79316	3.42352	3.91965	0.441578	0	0	0.545739	0	0	0	0	0	0	0	0	0	0	2.20417	0	0	5.28965	0	0	0	0	0	0	0	0	0	0	0	0	0.99488	0	0	0.832052	0	0	0	0	0	0	0	0	0	0
hsa-miR-3155a	0	0	0	0.186738	0	0.562009	0	0	0	0	0	0	0	0	0	0	0	0	0	0	0	0	0	0	0	0	0	0	0	0	0	0	0	0	1.25186	0	0	0	0	0	0	0	0	0	0	0	0	0	0
hsa-miR-3155b	0	0	0	0	0	0	0	0	0	0	0	0	0	0	0	0	0	0	0	0	0	0	0	0	0	0	0	0	0	0	0	0	0	0	0	0	0	0	0	0	0	0	0	0	0	0	0	0	0
hsa-miR-3156-3p	0	0	0	0	0	0	0	0	0	0	0	0	0	0	0	0	0	0	0	0	0	0	0	0	0	0	0	0	0	0	0	0	0	0	0	0	0	0	0	0	0	0	0	0	0	0	0	0	0
hsa-miR-3156-5p	0	0	0	0	0	0	0	0	0	0	0	0	0	0	0	0	0	0	0	0	0	0	0	0	0	0	0	0	0	0	0	0	0	0	0	0	0	0	0	0	0	0	0	0	0	0	0	0	0
hsa-miR-3157-3p	1.30063	0	0	0	0	0.802869	0	0	0	1.6992	1.53625	1.14116	0.644913	0.330237	1.28689	0	1.792	0	2.03618	0	0	0	0	0	1.1467	0.455605	0.268693	0.599828	0.618657	0.615013	0.615189	1.47612	0.814557	1.02009	0	0	0	0	1.1094	0	2.04328	0	0	0	0.392968	0.5658	0	0	0
hsa-miR-3157-5p	0	0	0.12236	0	0	1.16416	0	1.52172	0.436591	1.5104	1.34422	0.684698	1.28983	0.330237	0.714938	0	1.10277	3.82363	0	4.72322	0	1.93108	2.48925	0	0	0	0	0	0	0	0	0	0	0	4.3815	2.98464	0	4.15533	0	0	3.06492	0	0	0	0	0	0	0	0
hsa-miR-3158-3p	4.33543	0	0	0.248983	0	8.43013	3.4267	2.5362	4.69335	16.048	14.0183	18.4869	17.2514	7.04505	18.8744	21.4394	20.8148	4.58836	2.03618	7.55715	4.32169	6.17945	4.66734	8.41775	45.9826	45.1049	45.8122	31.5338	33.4075	51.7489	47.1059	46.4978	43.1715	41.241	11.8927	10.9437	19.6592	14.9592	8.59787	14.5512	8.68394	9.29142	9.24447	3.73976	24.8552	13.0134	14.6281	11.9415	18.6149
hsa-miR-3159	0	0	0	0	0	0	0	0	0	0	0	0	0	0	0	0	0	0	0	0	0	0	0	0	0	0	0	0	0	0	0	0	0	0	0	0	2.18436	0	0	0	0	0	0	0	0	0	0	0	0
hsa-miR-31-5p	0	82.2164	26.4909	63.4285	23.7629	6.18209	2.14169	2.5362	11.9335	2.26561	1.92032	0	2.09597	0.880631	2.2878	1.49578	3.584	198.064	120.135	1468.92	63.0967	277.303	5.91196	3.71371	0	0	0	0.17138	0	0	0	0	0	0.291456	272.279	676.519	382.991	176.186	47.7043	214.803	266.648	417.782	0.269256	0.233735	0.785936	0	0.412059	0.344467	0.617068
hsa-miR-3160-3p	0	0	0	0.186738	0.183734	0.602152	0	0	0	0	0	0	0	0	0	0	0	0	0	0	0	0	0	0	0	0	0	0	0	0	0	0	0	0	0	0	0	0	0	2.4252	0	0	0	0	0	0	0	0	0
hsa-miR-3160-5p	0	0	0	0	0	0	0	0	0	0	0	0	0	0	0	0	0	0	0	0	0	0	0	0	0	0	0	0	0	0	0	0	0	0	0	0	0	0	0	0	0	0	0	0	0	0	0	0	0
hsa-miR-3161	0	0	0	0	0	1.04373	0	0	0.909564	0	0	0	0	0	0	0	0	0	0	0	0	0	0	0	0	0	0	0	0	0	0	0	0	0	0	0	0	0	0	0	0	0	0	0	0	0	0	0	0
hsa-miR-3162-3p	0	0	0	0	0	0	0	0	0	0	0.384063	0.456466	0	0	0.428963	0	0	0	0	0	0	0	0	0	0	0	0	0	0	0	0	0	0	0	0	0	0	0	0	0	0	0	0	0	0	0	0	0	0.205689
hsa-miR-3162-5p	0	0	0	0	0	0	0	0	0	0	0	0	0	0	0	0	0	0	0	0	0	0	0	0	0	0	0	0	0	0	0	0	0	0	0	0	0	0	0	0	0	0	0	0	0	0	0	0	0
hsa-miR-3163	0	0.462261	0.36708	0.435721	0.244978	0	1.28501	0	0.618504	2.64321	1.72828	2.73879	1.61228	0.550394	1.85884	5.9831	2.48123	0	0	0	0	0	0	0	1.1467	0.569506	0	0.342759	0.618657	0.615013	0.615189	0	0	0	0	0	0	0	0	0	0	0	0.628265	0	1.08066	0	0.412059	0.574112	0
hsa-miR-3164	1.30063	1.0566	0.55062	0.684704	0.979914	0	0	0	0.945947	0	0	0	0	0	0	0	0	0	0	0	0	0	0	0	0	0	0	0	0	0	0	0	0	0	0	0	0	0	0	0	0	0	0	0	0	0	0	0	0
hsa-miR-3165	0	0	0	0	0	0	0	0	0	0.755202	0	0	0.483685	0	0	0	0	0	0	0	0	0	0	0	0	0	0	0	0	0	0	0	0	0	0	0	0	0	0	0	0	0	0	0	0	0	0	0	0
hsa-miR-3166	0	0	0	0	0	0	0	0	0	0	0	0	0	0	0	0	0	0	0	0	0	0	0	0	0	0	0	0	0	0	0	0	0	0	0	0	0	0	0	0	0	0	0	0	0	0	0	0	0
hsa-miR-3167	0	0	0	0	0	0	0	0	0	0	0	0	0	0	0	0	0	0	0	0	0	0	0	0	0	0	0	0	0	0	0	0	0	0	0	0	0	0	0	0	0	0	0	0	0	0	0	0	0
hsa-miR-3168	0	0	0	0	0	0	0	0	0	0	0	0	0	0	0	0	0	0	0	0	0	0	0	0	0	0	0	0	0	0	0	0	0	0	0	0	0	0	0	0	0	0	0	0	0	0	0	0	0
hsa-miR-3169	0	0	0	0	0	0	0	0	0	0	0	0	0	0	0	0	0	0	0	0	0	0	0	0	0	0	0	0	0	0	0	0	0	0	0	0	0	0	0	0	0	0	0	0	0	0	0	0	0
hsa-miR-3170	0	0.396224	0.24472	0.124492	0	0	0	0	0.945947	0	0	0	0	0	0	0	0	0	0	0	0	0	0	0	0	0	0	0	0	0	0	0	0	0	0	0	0	0	0	0	0	0	0	0	0	0	0	0	0
hsa-miR-3171	0	0	0	0	0	0	0	0	0	0	0	0	0	0	0	0	0	0	0	0	0	0	0	0	0	0	0	0	0	0	0	0	0	0	0	0	0	0	0	0	0	0	0	0	0	0	0	0	0
hsa-miR-3173-3p	0	0	0	0	0	0	0	0	0	0	0	0	0	0	0	0	0	0	0	0	0	0	0	0	0	0	0	0	0	0	0	0	0	0	0	0	0	0	0	0	0	0	0	0	0	0	0	0	0
hsa-miR-3173-5p	2.16771	0	0	0.186738	0	1.48531	0	0	0.618504	7.36322	8.44939	10.0422	9.19001	8.25592	12.011	25.9268	17.2308	0	3.25789	0	0	0	2.48925	0	1.49071	0.797309	0.940426	0.342759	1.34042	1.05431	1.40615	0.73806	0.814557	1.02009	0	0	5.09683	0	0	0	0	0	0.897521	0	0.884178	0	0.824118	0.459289	0.925602
hsa-miR-3174	0	0	0.3059	0.248983	0	3.17133	0	1.01448	1.20062	0	0	0	0	0	0	0	0	0	0	1.25953	0	0	0	0	0	0	0	0	0	0	0	0	0	0	0	0	0	0	0	0	0	0	0	0	0	0	0	0	0
hsa-miR-3175	0	1.18867	0.6118	0.871442	0.183734	0	0	0	0.618504	0	0	0	0	0	0	0	0	0	0	0	0	0	0	0	0	0	0	0	0	0	0	0	0	0	0	0	0	0	2.49616	0	0	0	0	0	0	0	0	0	0
hsa-miR-3176	0	0	0	0	0	5.70037	2.57002	2.02896	2.47401	0	0	0	0	0	0	0	0	0	0	2.83393	0	0	0	1.98065	1.37604	1.70852	0	1.19966	0.927985	1.23003	1.23038	1.03328	1.79203	0.582911	0	2.98464	5.82495	0	0.832052	4.15748	2.5541	0	0.269256	0	1.8666	1.9803	1.44221	0	0.514223
hsa-miR-3177-3p	0	0	0	0	0.489957	0.843013	0	0	1.16424	0	0	0	0	0	0	0	0	0	0	0	0	0	0	0	0	0	0	0	0	0	0	0	0	0	0	0	0	4.15533	0	0	0	0	0	0	0.98242	0	0	0	1.02845
hsa-miR-3177-5p	0	0	0	0	0	0	0	0	0	0	0	0	0	0	0	0	0	0	0	0	0	0	0	0	0	0	0	0	0	0	0	0	0	0	0	0	0	0	0	0	0	0	0	0	0	0	0	0	0
hsa-miR-3178	0	0	0	0	0	0	0	0	0	0	0	0	0	0	0	0	0	0	0	0	0	0	0	0	0	0	0	0	0	0	0	0	0	0	0	0	0	0	0	0	0	0	0	0	0	0	0	0	0
hsa-miR-3179	0	0.528298	0.42826	0.435721	0.489957	0	0	0	0	0	0	1.3694	0.806141	0	1.28689	0	0.275692	0	6.51577	3.4637	1.72868	3.86216	0	0	0	0	0	0	0	0	0	0	0	0	0	0	0	0	0	0	0	0	0	0	0	0	0	0	0
hsa-miR-3180	0	0	0	0	0	0.722582	0	0	0	0	0	0	0	0	0	0	0	0	0	0	0	0	0	0	0	0	0	0.17138	0	0	0	0	0	0	0	0	0	0	0	0	0	0	0	0	0	0	0	0	0
hsa-miR-3180-3p	0	0	0	0	0	0	0	0	0	0	0	0	0	0	0	0	0	0	0	0	0	0	0	0	0	0	0	0	0	0	0	0	0	0	0	0	0	0	0	0	0	0	0	0	0	0	0	0	0
hsa-miR-3180-5p	1.30063	0	0	0	0	0	0	0	0	0.755202	0	0	0	0	0	0.997183	0	0	0	1.57441	0	0	0	0	0	0	0	0	0	0	0	0	0	0	0	0	0	0	0	0	0	0	0	0	0	0	0	0	0
hsa-miR-3181	0	0	0	0	0	0	0	0	0	0	0	0	0	0	0	0	0	0	0	0	0	0	0	0	0	0	0	0	0	0	0	0	0	0	0	0	0	0	0	0	0	0	0	0	0	0	0	0	0
hsa-miR-3182	0	0	0	0	0	0.843013	0	0	0	0	0	0	0	0	0	0	0	0	0	0	0	0	0	0	0	0	0	0	0	0	0	0	0	0	0	0	0	0	0	0	0	0	0	0	0	0	0	0	0
hsa-miR-3183	0	0	0	0	0	1.24445	0	0	0	0	0	0	0	0	0	0	0	0	0	0	0	0	0	0	0	0	0	0	0	0	0	0	0	0	0	0	0	0	0	0	0	0	0	0	0	0	0	0	0
hsa-miR-3185	0	0	0	0	0	0	0	0	0	0	0	0	0	0	0	0	0	0	0	0	0	0	0	0	0	0	0	0	0	0	0	0	0	0	0	0	0	0	0	0	0	0	0	0	0	0	0	0	0
hsa-miR-3186-3p	0	0	0	0.186738	0	0	0	0	0	0	0	0	0	0	0	0	0	0	0	0	0	0	0	0	0	0	0	0	0	0	0	0	0	0	0	0	0	0	1.38675	0	0	0	0	0	0	0	0	0	0
hsa-miR-3186-5p	0	0	0	0	0	0	0	0	0	0	0	0	0	0	0	0	0	0	0	0	0	0	0	0	0	0	0	0	0	0	0	0	0	0	0	0	0	0	0	0	0	0	0	0	0	0	0	0	0
hsa-miR-3187-3p	0	0	0	0	0	0	0	0	2.36487	0	0	0.912931	1.1286	0	0	0	0	0	0	0	0	0	0	0	0	0	0	0	0	0	0	0	0	0	0	0	0	0	0	0	0	4.31387	0	0	0	0	0	0	0
hsa-miR-3187-5p	0	0	0	0	0	0	0	0	0	0	0	0	0	0	0	0	0	0	0	0	0	0	0	0	0	0	0	0	0	0	0	0	0	0	0	0	0	0	0	0	0	0	0	0	0	0	0	0	0
hsa-miR-3188	0	0	0	0	0	0	0	0	1.16424	0	0	0	0	0	0	0	0	0	0	2.51905	0	0	2.17809	0	0	0	0	0	0	0	0	0	0	0	0	0	0	0	1.1094	0	0	0.663673	0	0	0.49121	0	0	0.229645	0
hsa-miR-3189-3p	0	0	0	0	0	0	0	0	0	0	0	0	0	0	0	0	0	0	0	0	0	0	0	0	0	0	0	0	0	0	0	0	0	0	0	0	0	0	0	0	0	0	0	0	0	0	0	0	0
hsa-miR-3189-5p	0	0	0	0	0	0	0	0	0	0	0	0	0	0	0	0	0	0	0	0	0	0	0	0	0	0	0	0	0	0	0	0	0	0	0	0	0	0	0	0	0	0	0	0	0	0	0	0	0
hsa-miR-3190-3p	0	2.8396	1.71304	2.36534	2.69476	0	0	0	0.618504	0	0	0	0	0	0	0	0	0	0	0	0	0	0.622312	0	0	0	0	0	0	0	0	0	0	0	0	0	0	0	0	0	0	0	0	0	0	0	0	0	0
hsa-miR-3190-5p	0	0	0	0	0	0	0	0	0	0	0	0	0	0	0	0	0	0	0	0	0	0	0	0	0	0	0	0	0	0	0	0	0	0	0	0	0	0	0	0	0	0	0	0	0	0	0	0	0
hsa-miR-3191-3p	0	0.132075	0.67298	0	0	0	0	0	0.0727651	0	0	0	0	0	0	0	0	0	0	0	0	0	0	0	0	0	0	0	0	0	0	0	0	0	0	0	0	0	0	0	0	0	0	0	0	0	0	0	0
hsa-miR-3191-5p	0	0	0	0	0	0	0	0	0	0	0	0	0	0	0	0	0	0	0	0	0	0	0	0	0	0	0	0	0	0	0	0	0	0	0	0	0	0	0	0	0	0	0	0	0	0	0	0	0
hsa-miR-3192-3p	0	0	0	0	0	0	0	0	0	0	0	0	0	0	0	0	0	0	0	0	0	0	0	0	0	0	0	0	0	0	0	0	0	0	0	0	0	0	0	0	0	0	0	0	0	0	0	0	0
hsa-miR-3192-5p	0	2.57545	2.38602	3.11229	2.75601	0	0	0	0	0	0	0	0	0	0	0	0	0	0	0	0	0	0	0	0	0	0	0	0	0	0	0	0	0	0	0	0	0	0	0	0	0	0	0	0	0	0	0	0
hsa-miR-3193	0	0.594335	0.55062	0.560213	0	0	0	0	0.654886	0	0	0	0	0	0	0	0	0	0	0	0	0	0	0	0	0	0	0	0	0	0	0	0	0	0	0	0	0	0	0	0	0	0	0	0	0	0	0	0
hsa-miR-3194-3p	0	0	0	0	0	0	0	0	0.764034	0	0	0	0	0	0	0	0	13.7651	13.846	24.5607	14.6938	13.9038	5.91196	2.97097	0	0	0	0	0	0	0	0	0	0	0	0.663254	0	0	0	3.46457	0	0	0	0	0.196484	0	0	0	0
hsa-miR-3194-5p	0	0	0	0	0	1.80646	0	1.01448	1.38254	0	0	0	0	0	0	0	0	0	0	3.77858	0	0	0	0	0	0	0	0	0	0	0	0	0	0	0	0	0	0	1.38675	3.46457	0	0	0	0	0	0	0	0	0
hsa-miR-3195	0	2.64149	3.12018	3.92149	2.14356	19.3492	0	0	4.54782	0	0	0	0	0	0	0	0	0	0	0	0	0	120.417	27.2339	0	0	0	0	0	0	0	0	0	0	0	0	0	0	0	0	0	0	0	0	0	0	0	0	0
hsa-miR-3196	0	0	0	0	0	6.10181	0	0	2.11019	0	0	0	0	0	0	0	0	537.603	0	55.1042	0	0	0	8.91291	0	0	0	0	0	0	0	0	0	0	6.88522	0	0	0	0	0	0	0	0.179504	0	0	0	0	0	0
hsa-miR-3197	0	0	0	0	0	0	0	0	0.363826	0	0	0	0	0	0	0	0	0	0	0	0	0	0	0	0	0	0	0	0	0	0	0	0	0	0	0	0	0	0	0	0	0	0	0	0	0	0	0	0
hsa-miR-3198	0	0	0	0	0	0	0	0	0	0	0	0	0	0	0	0	0	0	0	0	0	0	0	0	0	0	0	0	0	0	0	0	0	0	0	0	0	0	0	0	0	0	0	0	0	0	0	0	0
hsa-miR-3199	0	0.990559	0.79534	0.622459	0.428712	1.16416	0	0	0.836799	0.566401	0	0	1.45105	0	1.1439	0	0	0	3.25789	5.35298	0	4.24837	2.8004	2.97097	0.45868	0.341704	0	0	0.515547	0.175718	0.263652	0	0.488734	0	0	1.65813	0	0	1.38675	0	4.59738	2.32286	0	0	0.294726	0	0	0	0
hsa-miR-3200-3p	1.73417	1.58489	2.32484	1.68064	1.46987	3.09105	0	0	3.92932	13.0272	10.9458	24.1927	14.9942	7.59544	15.7286	4.48733	13.9225	9.17672	14.2533	13.5399	5.18603	9.26917	11.8239	4.20888	4.24279	5.23946	4.97082	3.17052	3.71194	3.69008	2.72441	2.65701	3.42114	3.78892	8.76301	9.61718	11.6499	10.8039	9.70727	8.31496	10.2164	5.97306	5.38513	2.45422	11.4943	9.90151	11.1256	4.59289	4.73086
hsa-miR-3200-5p	0	0.72641	2.08012	1.43165	1.77609	0.802869	0	0	0.363826	7.36322	4.03266	9.12931	9.35123	3.96284	10.5811	9.47324	12.544	6.11781	0.814472	2.20417	3.45735	2.31729	39.2056	111.411	3.55477	2.39193	3.08997	1.54242	1.75286	2.19647	1.49403	1.91896	1.30329	0.874367	0	1.98976	0	0	1.38675	4.15748	1.53246	0	0.448761	0	1.8666	1.4145	1.23618	0.574112	1.02845
hsa-miR-3201	0	0	0	0	0	0	0	0	0	0	0	0	0	0	0	0	0	0	0	0	0	0	0	0	0	0	0	0	0	0	0	0	0	0	0	0	0	0	0	0	0	0	0	0	0	0	0	0	0
hsa-miR-3202	0	0.462261	0.85652	0.435721	0.734935	0	0	0	0	0.755202	0.960158	0	0	0	0.857926	0	0.964924	0	0	0	0	0	0	0	0.34401	0	0.268693	0	0	0.175718	0.175768	0	0	0	0	0	3.64059	0	0	0	0	0	0	0	0	0	0.412059	0	0
hsa-miR-320a/b/c/d	226.526	32832.5	36747.5	20280.4	35123.4	1011.13	442.472	430.647	349.527	499.755	372.733	589.982	465.466	150.258	389.641	1740.09	2998.02	550.603	656.057	1133.26	574.785	557.309	12361.3	11286.2	125.449	121.533	124.674	107.798	108.987	127.132	121.456	119.861	122.021	118.331	1224.32	1483.37	1586.57	1973.78	1233.38	1104.16	1373.6	1376.46	504.317	126.801	882.115	890.004	622.827	822.243	821.832
hsa-miR-320e	0	0	0	0	0	0	0	0	0.982329	0	0	0	0	0	0	0	0	0	0	0	0	0	43.5618	31.6904	0	0	0	0	0	0	0	0	0	0	0	0	0	0	0	1.73228	0	0	0	0	0	0	0	0	0
hsa-miR-323a-3p	2.16771	3.16979	4.03788	5.35314	3.9809	5.17851	0	1.01448	0.400208	0	0.576095	0	0.806141	1.10079	0.714938	3.98873	3.44616	36.7069	41.9453	51.6405	42.3526	34.7594	5.91196	42.3363	0.34401	0.341704	0	0	0.206219	0.439295	0	0	0	0	0	1.32651	3.64059	0	0	1.03937	0	0	0	0	0.294726	0	0	0	0
hsa-miR-323a-5p	0	0.264149	0	0	0.306223	0.562009	0	0	0	0	0	0	0	0	0	0	0	0	0	1.57441	0	0	0	0	0	0	0	0	0	0	0	0	0	0	0	0	0	0	0	0	0	0	0	0	0	0	0	0	0
hsa-miR-323b-3p	0	0.528298	0.97888	0.684704	0.551201	0.843013	1.28501	1.52172	0.400208	0.566401	1.72828	2.05409	0.483685	1.10079	3.57469	3.49014	4.41108	19.8829	12.2171	14.1697	17.2868	20.0832	4.66734	5.94194	0.80269	0.797309	0.80608	1.02828	1.03109	1.05431	1.23038	0.590448	0.488734	0.728639	0	0	4.36871	4.15533	0	0	0	0	0	0	1.37539	0	0.412059	0	0
hsa-miR-323b-5p	0	0	0	0	0	0	0	0	0	0	0	0	0	0	0	0	0	0	0	0	0	0	0	15.8452	0	0	0	0	0	0	0	0	0	0	0	0	0	0	0	0	0	0	0	0	0	0	0	0	0
hsa-miR-32-3p	1.73417	0	0	0.311229	0	1.44516	2.14169	2.02896	3.78379	0	0	0	0	0	0	0	0	93.2966	128.687	90.0561	85.5695	115.865	5.28965	3.46613	0	0	0	0	0	0	0	0	0	0	6.25929	8.29067	5.82495	4.15533	13.3128	5.5433	8.17312	7.96408	0	0	0.49121	0	0	0.229645	0
hsa-miR-324-3p	9.1044	15.6508	18.1093	13.9431	16.1073	27.4581	13.7068	7.6086	21.9023	97.421	71.0517	105.672	63.6851	40.399	96.5166	84.7606	69.3366	32.8832	43.5742	138.863	44.9456	53.2977	481.98	394.644	20.1819	23.5776	19.3459	8.3976	9.07363	14.7603	14.6766	12.3994	13.6846	15.8843	40.6854	50.4073	57.5214	73.1339	46.0402	51.9685	72.0256	50.1073	6.64166	1.63615	13.8521	8.487	12.1557	10.334	21.3917
hsa-miR-324-5p	1.73417	11.4244	15.3562	14.5033	12.2489	45.4023	12.8501	11.1593	23.2485	54.9409	36.8701	60.7099	42.0806	24.2174	49.9027	41.3831	35.9779	81.061	122.578	288.431	81.2478	113.547	355.029	197.322	18.2325	23.0081	23.7794	9.94001	12.0638	13.2667	15.5555	16.8278	14.9879	13.9899	96.3931	108.774	134.702	127.153	121.48	114.331	134.346	72.3404	2.15405	0.233735	10.6101	7.3554	4.94471	4.24843	3.49672
hsa-miR-325	0	0	0	0	0	0	0	0	0	0	0	0	0	0	0	0	0	0	0	0	0	0	0	0	0	0	0	0	0	0	0	0	0	0	0	0	0	0	0	0	0	0	0	0	0	0	0	0	0
hsa-miR-32-5p	31.4319	4.4245	2.08012	3.11229	2.51103	14.4115	28.6986	24.8548	1235.84	2.45441	1.53625	2.51056	1.1286	1.21087	1.85884	0	0	272.243	247.192	176.019	198.798	330.987	72.4993	38.6226	0	0.227803	0	0	0	0.263577	0	0.590448	0.488734	0.291456	240.357	113.748	168.195	107.208	287.89	125.417	171.636	162.268	0.269256	0	1.37539	0.8487	1.85427	0.344467	0.205689
hsa-miR-326	0	3.10375	2.38602	0	0	20.7943	0	0	97.1051	36.6273	27.8446	39.256	25.1516	15.7413	54.1923	31.9099	22.4689	0	0	32.7477	19.0154	0	29.871	29.9573	8.60025	11.3901	11.0164	6.16966	7.21766	7.02872	8.08534	8.26627	8.63431	6.99493	49.4484	46.4277	74.2681	60.6679	25.2389	44	52.1037	40.4841	4.48761	2.57109	8.35057	0	0	12.4008	4.42232
hsa-miR-328-3p	151.306	12.7452	10.7677	11.9512	13.9025	39.1399	29.1269	25.8692	27.5416	94.4002	96.7839	89.6955	71.2629	73.0924	101.092	163.538	123.924	25.236	23.2124	49.7513	35.4379	27.4213	397.657	401.824	33.1396	35.1955	31.5715	29.3059	29.7986	32.3321	30.8473	30.8509	27.3691	22.2964	167.123	190.685	186.398	336.582	206.626	196.441	273.8	150.322	9.69323	3.62289	12.2803	17.5398	11.3316	19.6346	26.7396
hsa-miR-328-5p	0	0	0	0	0	0	0	0	0	0	0	0	0	0	0	0	0	0	0	0	0	0	0	0	0	0	0	0	0	0	0	0	0	0	0	0	0	0	0	0	0	0	0	0	0	0	0	0	0
hsa-miR-329-3p	3.0348	4.35846	4.46614	4.35721	3.55219	1.68603	0	0	1.41892	0.377601	1.15219	1.14116	2.57965	4.62331	5.29054	4.48733	3.85969	42.06	30.5427	31.1733	31.9805	30.1248	16.4913	20.0541	0	0	0	0	0	0	0	0	0	0	4.3815	0	2.18436	3.32427	1.6641	0	3.06492	1.32735	0	0	0	0	0	0	0
hsa-miR-329-5p	0	0.132075	0	0	0.489957	0.602152	0	0	0	0	0	0	0	0	0	0	0	0	0	0	0	0	0	0	0	0	0	0	0	0	0	0	0	0	0	0	0	0	0	0	0	0	0	0	0	0	0	0	0
hsa-miR-330-3p	3.0348	117.546	125.541	102.643	130.635	8.18927	1.71335	1.52172	15.79	8.30722	4.41673	6.84698	9.51246	6.2745	5.43353	15.4563	11.0277	23.7065	32.5789	63.9209	31.9805	39.7802	34.5383	34.6613	0.57335	1.02511	0	0.428449	0	0	0.439421	0	0.325823	0	12.5186	8.29067	22.5717	8.31067	8.32052	9.70078	8.17312	10.2869	0	0	0	0	0	0	0
hsa-miR-330-5p	0	0	0	0	0	13.9298	3.4267	3.55068	5.6393	6.41922	3.84063	4.56466	7.73895	3.74268	4.5756	7.47888	5.78954	48.9425	58.2347	79.665	43.2169	51.7529	12.1351	16.5879	2.06406	1.59462	2.0152	0.942588	0.824876	1.66932	1.31826	1.32851	1.95494	1.31155	16.9001	18.9027	21.8436	19.1145	18.3051	18.0157	18.9003	12.278	0	0	1.08066	0	0	0.574112	0.411379
hsa-miR-331-3p	40.753	99.6502	79.4116	114.968	41.9526	59.5328	28.6986	27.8982	68.1446	574.52	444.937	495.95	242.165	173.154	571.235	290.679	304.502	158.298	202.396	415.014	164.224	162.597	168.646	96.0614	51.4868	70.0493	70.2633	22.4507	27.7364	36.5493	38.4932	35.1316	29.1611	29.437	177.138	263.975	259.938	300.846	222.713	214.11	334.076	278.079	2.87207	1.98675	25.9359	29.4216	13.1859	18.9457	5.55361
hsa-miR-331-5p	5.85283	1.45282	1.10124	0.809196	0.673691	6.42296	1.71335	3.04344	7.38566	10.7616	10.3697	12.3246	7.09404	3.30237	9.58017	5.48451	9.37354	13.7651	18.7328	23.931	17.2868	18.9246	18.3582	23.025	0	0.569506	0.537386	0.342759	0.412438	0.527154	0.878841	0.885672	0.488734	0	13.1445	15.2548	13.8343	14.1281	11.6487	10.3937	13.7921	12.6098	0.179504	0	2.65253	1.6974	1.85427	0.803756	1.13129
hsa-miR-335-3p	10.1883	0.264149	0.42826	0	0.183734	36.8517	123.361	112.1	143.347	11.1392	3.84063	9.58578	10.1574	12.4389	10.1521	7.97747	10.752	302.832	274.884	162.164	154.717	596.703	10.5793	49.7638	2.75208	3.75874	4.29909	2.39931	2.26841	3.33864	2.72441	3.98552	3.25823	2.33164	87.6301	91.8606	79.365	118.843	171.403	118.142	126.173	99.551	0	0	1.57187	1.1316	1.23618	0.229645	0.308534
hsa-miR-335-5p	7.15346	7.99051	14.1938	11.889	11.1465	32.3556	48.4021	49.2023	322.604	22.0897	23.4279	23.9644	30.6334	20.6948	25.4518	17.9493	30.7397	2255.18	1885.5	694.628	1277.49	3714.62	37.0275	98.7848	1.03203	1.48072	0.940426	0.771208	0.309328	0.702872	1.14249	0.885672	0.651646	0.437183	250.372	180.737	158.002	250.151	352.79	223.464	311.089	260.492	0	0	0	0	0	0	0
hsa-miR-337-3p	3.25157	4.16035	5.07794	6.53582	3.9809	5.05808	2.14169	2.02896	5.02079	0	0	0	0.644913	0.770552	0.285975	0.997183	0.551385	82.5905	40.3163	39.6751	44.9456	44.801	35.7829	25.5008	0	0	0	0	0	0	0	0	0	0	5.63336	1.98976	3.64059	6.64853	4.43761	5.19685	5.1082	1.65918	0	0	0	0	0	0	0
hsa-miR-337-5p	0	1.65093	1.04006	1.36941	0.79618	1.28459	0	1.52172	0.836799	0	0	0	0	0	0	0	0	78.0021	62.7143	104.856	53.589	73.7672	1.24462	2.47581	0	0	0	0	0	0	0	0	0	0	0	0.99488	0	0	0	2.07874	1.53246	0	0	0	0	0	0	0	0
hsa-miR-338-3p	2.60126	11.4905	18.4152	22.4708	15.0049	97.3078	19.2752	21.3041	216.44	0	0.576095	1.3694	0.967369	0.330237	0.428963	0	0	1729.05	1533.24	1047.3	1350.1	1507.01	57.5638	69.0751	0	0	0.268693	0.17138	0	0.175718	0	0	0	0	140.208	158.518	152.905	143.775	203.021	153.48	109.316	163.264	0	0	0	0	0	0	0
hsa-miR-338-5p	3.68511	1.65093	1.65186	3.11229	1.1024	11.4409	0	9.63756	47.0427	0.755202	0	2.73879	2.09597	0.770552	2.85975	0.997183	1.92985	122.356	193.844	164.998	134.837	186.928	28.004	37.6323	0	0	0	0	0	0	0	0	0	0	9.38894	28.8515	21.8436	33.2427	24.9616	22.1732	30.1384	24.5559	0	0	0	0	0	0	0
hsa-miR-339-3p	11.7057	21.33	23.3096	23.5289	20.5782	65.2331	31.2686	40.5792	51.4813	37.1937	21.6996	26.7032	30.3109	9.9071	31.0283	25.9268	43.5594	386.187	628.365	723.597	473.658	381.581	156.511	238.916	16.0538	20.5022	18.2711	8.14053	8.45497	12.8274	13.0069	12.8422	12.0554	11.804	245.364	122.702	217.708	253.475	206.626	202.677	197.687	183.837	0.538513	0	3.7332	2.2632	3.70853	1.83716	2.67396
hsa-miR-339-5p	12.7895	23.047	24.1661	15.3125	16.6585	40.1033	6.42506	9.13032	24.6674	544.501	388.672	443.456	454.502	255.823	509.608	440.755	567.651	723.431	773.748	1097.36	900.641	636.483	309.289	241.144	6.99487	8.20089	7.65776	4.28449	5.05236	7.38015	6.85496	5.60925	7.33102	6.41202	32.5483	32.4994	50.2402	39.0601	19.4145	34.6457	39.844	29.8653	0	0.233735	1.47363	0.8487	1.23618	0.574112	0.411379
hsa-miR-33a-3p	0	1.51886	0.79534	1.36941	1.04116	2.64947	2.99836	3.04344	10.7329	0	0	0	0	0	0	0	0	38.2363	28.5065	16.3738	23.3371	28.9662	22.0921	11.8839	0	0	0	0	0	0	0	0	0	0	9.38894	3.64789	11.6499	5.81747	5.54701	5.88976	8.68394	1.32735	0	0	0	0	0	0	0
hsa-miR-33a-5p	0	65.1788	34.9338	46.3732	20.0882	2.81004	5.56838	2.5362	79.3504	0	0	0	0	0	0	0	0	32.8832	34.2078	39.6751	26.7945	40.5526	49.1626	53.4775	0	0	0	0	0	0	0	0	0	0	2.50372	4.64277	6.55307	0	2.49616	4.15748	4.59738	0	0	0	0	0	0	0	0
hsa-miR-33b-3p	0	0	0	0	0	1.32473	10.7084	9.63756	0.509356	0	0	0	0.322456	0.220158	0	0	0	0	0	2.83393	0	1.15865	0	5.94194	0	0	0	0	0	0	0	0	0	0	0	0	0	4.9864	1.6641	3.81102	0	1.32735	0	0	0	0	0	0	0
hsa-miR-33b-5p	0	0.396224	0	0	0	5.05808	29.5553	26.8837	12.7703	0	0	0	0	0	0	0	0	6.11781	9.36642	18.578	8.64339	8.11053	10.5793	7.42743	0	0.341704	0	0	0	0	0	0	0	0	26.915	20.8925	18.9311	14.1281	19.1372	18.7087	17.3679	7.96408	0	0	0.196484	0	0	0	0
hsa-miR-340-3p	26.6629	0.264149	0	0.373475	0	11.5212	19.7035	16.7389	5.71206	14.3488	17.4749	18.0304	36.9213	20.0344	17.5875	31.4113	28.3963	103.238	184.071	97.6132	100.263	101.575	8.71236	17.0831	1.26137	1.13901	1.47781	1.54242	0.618657	0.87859	1.31826	0.885672	0.651646	0.874367	7.51115	9.9488	10.9218	9.14173	10.8167	6.23622	9.19476	10.9506	0	0	0.392968	0.8487	0.412059	0	0.514223
hsa-miR-340-5p	232.596	233.772	201.772	276.309	206.272	264.425	552.127	566.587	186.861	22.6561	13.2502	19.628	16.4453	5.61402	11.725	3.98873	12.9575	1031.62	1299.49	809.245	1095.12	1452.17	133.797	106.212	3.78411	3.98654	4.83648	3.17052	4.84614	5.27154	4.30632	4.42836	4.07279	5.2462	426.258	305.428	430.318	314.143	524.193	363.779	359.617	358.052	1.07703	0	1.27715	0	0	1.14822	0.617068
hsa-miR-342-3p	41.6201	426.733	415.229	610.134	429.692	202.684	262.999	273.91	518.488	485.595	594.914	558.029	1141.5	1199.86	668.753	778.302	1941.43	362.48	412.937	582.216	323.263	481.611	745.218	808.104	22.59	21.869	25.5259	20.4799	18.7659	20.3833	18.0162	18.4515	16.7799	17.1959	348.017	532.593	898.499	374.811	267.643	321.512	396.396	251.864	2.33355	0.818073	18.7642	15.2766	14.01	5.51147	3.08534
hsa-miR-342-5p	1.95094	4.16035	7.21924	8.65217	9.24793	8.43013	3.4267	6.08688	27.869	7.36322	7.2972	7.30345	8.70632	6.82489	8.15029	11.9662	22.1932	11.4709	17.1039	25.5054	9.50772	11.2002	58.1861	78.7307	0.45868	0.455605	0.940426	0.514139	0.515547	1.05431	0.790957	0.295224	0.977469	0.874367	21.9075	21.5557	32.0372	13.2971	10.8167	14.8976	13.7921	9.9551	1.52579	0.350603	4.9121	3.3948	2.26632	2.98538	5.14223
hsa-miR-345-3p	0	0	0	0.311229	0	0	0	0	0	0	0	0	0	0	0	0	0	0	0	0	0	0	0	0	0	0	0	0	0	0	0	0	0	0	0	2.98464	7.28119	0	3.05086	2.77165	3.06492	1.99102	0	0	0	0	0	0	0
hsa-miR-345-5p	83.8905	15.1225	17.5587	16.9931	17.7609	96.7859	170.907	168.404	23.0665	44.9345	25.1561	44.7336	40.952	16.1816	31.4573	22.4366	35.9779	130.004	203.211	440.834	167.682	182.68	213.142	181.724	34.8597	39.0681	32.6462	17.8235	20.0032	32.42	29.7048	28.1939	28.9982	23.7536	1214.93	1362.65	1682.68	1200.06	2329.47	1219.18	1792.47	2198.42	11.578	1.16868	30.455	28.5729	24.1055	5.51147	13.267
hsa-miR-346	0	0.264149	0.55062	0.311229	0.122489	0.802869	0	0	0.582121	0.566401	0	0	0	0	0	0	0	0	0	2.20417	0	0	0	1.48549	0	0	0	0	0	0	0	0	0	0	10.6408	3.97952	9.46555	5.81747	5.54701	7.27559	11.238	4.97755	0	0	0	0	0	0	0
hsa-miR-34a-3p	0	5.61317	3.3649	6.84704	3.06223	2.24803	1.28501	2.02896	6.29418	0	0	0	0	0	0	0	0	20.6476	19.9546	17.0036	15.5581	19.697	10.5793	23.7678	0	0	0	0	0	0	0	0	0	0	3.75557	2.98464	0	0	2.2188	5.19685	3.57574	2.98653	0	0	0	0	0	0	0
hsa-miR-34a-5p	3.90189	21.8583	23.4319	33.1148	15.6786	137.732	144.35	145.071	370.775	1.888	0	0	0.322456	0	0	0	0	2900.61	2647.44	3212.11	2783.17	3392.9	1108.03	1161.9	0	0	0	0	0	0.439295	0	0	0	0	134.575	170.788	219.164	105.545	90.6936	239.055	216.077	197.443	0	0	0	0	0	0	0
hsa-miR-34b-3p	0	0	0.3059	0.497967	0	1.04373	0	0	32.8898	0	0	0	0	0	0	0	0	2.29418	0	3.77858	0	1.93108	0	3.9613	0	0	0	0	0	0	0	0	0	0	5.63336	0	8.00931	2.4932	3.32821	4.15748	3.57574	4.97755	0	0	0	0	0	0	0
hsa-miR-34b-5p	0	0.594335	0.79534	0.933688	0.367468	2.28818	0	0	84.1893	0	0	0	0	0	0	0	0	10.7062	4.47959	9.76132	4.32169	5.79323	20.2251	5.1992	0	0	0	0	0	0	0	0	0	0	8.76301	6.30091	14.5624	4.9864	3.88291	10.7402	9.19476	3.31837	0	0	0	0	0	0	0
hsa-miR-34c-3p	0	0	0	0	0	1.60574	0	0	41.2942	0	0	0	0	0	0	0	0	0	3.25789	4.72322	0	1.93108	0	1.98065	0	0	0	0	0	0	0	0	0	0	0	1.98976	6.55307	3.32427	1.94145	7.27559	1.02164	1.99102	0	0	0	0	0	0	0
hsa-miR-34c-5p	2.38449	37.9054	43.0095	34.173	32.0922	19.1484	0	0	4787.62	0	0.384063	0	0	0	0	0	0	24.4712	18.7328	43.7685	8.64339	22.0143	39.8279	83.6824	0	0	0	0	0	0	0	0	0	0	48.8225	52.0654	82.2774	39.0601	44.9308	63.4015	55.6794	32.1881	0	0	0	0	0	0	0
hsa-miR-3529-5p	0	0	0	0	0.183734	0	0	0	0.218295	0	0	0	0	0	0	0	0	0	0	0	0	0	0	0	0	0	0	0	0	0	0	0	0	0	0	0	0	0	0	0	0	0	0	0	0	0	0	0	0
hsa-miR-3591-5p	37.7182	0	0	0	0	0	17.9902	24.3475	0	0	0	0	0	0	0	0	0	0	0	0	0	0	0	0	0	0	0	0	0	0	0	0	0	0	0	0	0	0	0	0	0	0	0	0	0	0	0	0	0
hsa-miR-3605-3p	0.867086	0	0	0	0.183734	4.17492	4.71171	2.02896	2.2921	10.5728	4.99282	9.35754	6.93281	5.17371	10.8671	11.9662	10.8899	0	2.44341	3.77858	9.50772	0	3.73387	12.379	9.51761	11.3901	8.73253	5.99828	5.4648	8.3466	7.90957	6.93776	6.19064	5.53766	6.88522	6.96416	5.82495	6.64853	8.87522	11.4331	8.68394	7.3004	3.23108	1.28554	4.32265	1.6974	2.88441	3.67431	6.78775
hsa-miR-3605-5p	0	7.33014	8.01458	8.83891	10.4116	2.08746	3.4267	3.04344	2.65593	0	0	0	0	0	0	0	0.275692	0	0	0	0	1.93108	1.86693	8.91291	0.68802	0.341704	0	0.257069	0	0	0.351537	0.442836	0	0	3.75557	4.9744	9.46555	8.31067	4.16026	5.5433	8.68394	3.98204	0	0	0.785936	0	0	0.574112	0.925602
hsa-miR-3606-3p	0	0	0	0	0	0	0	0	0	0	0	0	0	0	0	0	0	0	0	0	0	0	0	0	0	0	0	0	0	0	0	0	0	0	0	0	0	0	0	0	0	0	0	0	0	0	0	0	0
hsa-miR-3606-5p	0	0.264149	0.24472	0	0	0	0	0	0	0	0	0	0	0	0	0	0	0	0	0	0	0	0	0	0	0	0	0	0	0	0	0	0	0	0	0	0	0	0	0	0	0	0	0	0	0	0	0	0
hsa-miR-3607-3p	6.71991	0	0	0	0	20.2725	11.1368	6.59412	30.052	0	0	0	0	0	0	0	0	19.1182	4.88683	4.72322	26.7945	10.4278	2.48925	0	0	0	0	0	0	0	0.175768	0	0	0	53.204	42.7799	52.4246	39.8912	51.0325	56.8189	50.0604	53.4257	0.179504	0	0	0	0	0	0
hsa-miR-3607-5p	0	0	0	0	0	0.802869	0	0	1.05509	0	0	0	0	0	0	0	0	6.88254	3.66512	3.4637	7.77905	5.79323	3.11156	0	0	0	0	0	0	0	0	0	0	0	0	0	0	0	0	0	2.04328	0.99551	0	0	0	0	0	0	0
hsa-miR-3609	0	0.132075	0	0.186738	0	1.00359	0	1.52172	1.20062	0	0	0	0	0	0	0	0	9.17672	8.95919	9.76132	6.05037	8.49674	0	1.48549	0	0	0	0	0	0	0	0	0	0	8.13708	2.65301	16.0186	10.8039	4.16026	10.7402	0	2.65469	0	0	0.294726	0	0	0	0
hsa-miR-3610	0	0	0	0	0	1.72617	0	0	0	0	0	0	0	0	0	0	0	0	0	0	0	0	2.17809	0	0	0	0	0	0	0	0	0	0	0	0	0	0	0	0	0	0	0	0	0	0	0	0	0	0
hsa-miR-3611	0	0	0	0	0	0.762726	0	0	1.60083	0	0	0	0	0	0	0	0	12.2356	5.7013	9.76132	13.8294	11.9727	4.97849	2.72339	0	0	0	0	0	0	0	0	0	0	0	0	2.18436	1.66213	0	0	0	0	0	0	0	0	0	0	0
hsa-miR-3612	0	0	0	0.248983	0	0	0	0	0	0	0	0	0	0	0	0	0	0	0	3.14881	0	1.93108	0	0	0	0	0	0	0	0	0	0	0	0	0	0	0	0	0	0	0	0	0	0	0	0	0	0	0
hsa-miR-3613-3p	7.37023	3.76412	3.60962	4.23272	3.91965	2.7699	0	0	8.11331	35.4945	44.1673	61.8511	27.57	23.5569	65.3453	44.8733	39.9754	23.7065	28.9137	32.1179	30.2519	37.4629	5.6008	10.8936	2.63741	1.70852	1.88085	0.942588	1.54664	0.87859	1.40615	0.590448	1.62911	1.31155	7.51115	7.29579	7.28119	10.8039	5.26966	7.9685	11.7489	5.64122	0	0	0	0	0.618089	0	0
hsa-miR-3613-5p	30.9983	1.0566	1.71304	1.55615	1.53112	3.01076	8.56675	11.6665	385.837	122.343	13.0581	27.1597	4.83685	3.41245	1.42988	0	2.20554	1186.86	201.582	103.281	197.069	144.831	6.22312	12.1315	0.22934	0	0	0	0	0	0.351537	0	0	0	33.1742	16.2497	26.9404	22.4388	33.2821	15.937	27.0735	19.2465	0	0	0	0	0.824118	1.26305	0.308534
hsa-miR-361-3p	128.762	7.46221	8.01458	13.8808	9.67665	154.071	59.5389	48.695	30.3794	220.897	179.55	188.52	240.714	110.189	185.598	196.445	222.346	193.476	181.627	341.331	160.767	189.632	151.844	352.06	51.2575	52.0529	52.6639	38.6461	41.9655	50.8704	49.6545	51.2213	45.4523	40.9495	339.254	272.597	309.451	290.042	239.908	298.992	208.415	357.388	2.60281	1.40241	16.8976	9.05281	12.9799	6.77452	7.40482
hsa-miR-3614-3p	0	1.0566	1.10124	2.24085	1.34738	3.25162	0	0	66.1435	0	0	0	0	0	0	0	0	0	3.66512	3.4637	0	2.70351	0	5.44678	0	0	0	0	0	0	0	0	0	0	5.00743	0	0	0	0	0	0	0	0	0	0	0	0	0	0
hsa-miR-3614-5p	0	0.990559	2.32484	1.68064	1.16365	4.93765	8.56675	7.10136	1.63722	0	0	0	0	0	0	0	0	0	0	0	0	0	0	0	0.45868	0	0	0.514139	0.309328	0.351436	0.615189	0	0	0.291456	6.25929	0.663254	5.82495	0	0	4.15748	0	4.31387	0.359008	0.46747	0.589452	0	0	0	0
hsa-miR-3615	12.1392	2.77357	1.95776	2.9878	1.28614	23.8452	32.5536	33.4778	3.01975	447.268	300.721	373.389	400.007	281.912	449.267	903.448	543.39	74.9432	37.4657	53.5298	81.2478	55.615	79.967	79.9686	355.821	363.117	344.599	326.649	353.872	393.784	371.838	373.753	365.573	365.922	23.7853	24.872	28.3966	23.2699	15.2543	25.6378	12.7705	19.2465	68.1218	18.6988	90.4809	53.1852	68.8139	50.5218	91.6346
hsa-miR-361-5p	112.938	34.3394	29.7946	53.4069	30.3773	161.216	151.631	156.23	159.61	74.0098	56.6493	72.578	87.5469	48.9851	74.4965	78.7775	87.5323	900.083	1198.49	1596.76	841.866	1260.22	1004.72	1496.87	8.37091	10.4789	9.8073	4.62725	7.01144	8.69804	7.29438	8.85672	8.30848	7.28639	244.738	214.231	242.464	294.198	239.076	272.315	294.232	250.205	0.807769	0	8.05585	4.2435	6.38692	2.0668	1.74836
hsa-miR-3616-3p	0	0	0	0	0	0	0	0	0	0	0	0	0	0	0	0	0	0	0	0	0	0	0	0.990324	0	0	0	0	0	0	0	0	0	0	0	0	0	0	0	0	0	0	0	0	0	0	0	0	0
hsa-miR-3616-5p	0	0	0	0	0	0	0	0	0	0	0	0	0	0	0	0	0	0	0	0	0	0	0	0	0	0	0	0	0	0	0	0	0	0	0	0	0	0	0	0	0	0	0	0	0	0	0	0	0
hsa-miR-3617-3p	0	0.660373	0	0	0	0.963443	0	0	0	0	0	0	0	0	0	0	0	0	0	0	0	0	0	0	0	0	0	0	0	0	0	0	0	0	0	0	0	0	0	0	0	0	0	0	0	0	0	0	0
hsa-miR-3617-5p	0	0.462261	0	1.12043	0	0.802869	0	0	1.01871	0	0	0	0	0	0.428963	0	0	0	0	2.20417	0	0	14.6243	0.742743	0	0	0	0	0	0	0	0	0	0	0	0	0	0	0	0	0	1.65918	0	0	0	0	0	0	0
hsa-miR-3618	0	0	0	0	0	0	0	0	0	0	0	0	0	0	0	0	0	0	0	0	0	0	0	0	0	0	0	0	0	0	0	0	0	0	0	0	0	0	0	0	0	0	0	0	0	0	0	0	0
hsa-miR-3619-3p	0	0	0	0	0	0	0	0	0	0	0.384063	0.684698	0	0	0	0	0	0	0	0	0	0	0	0	0	0	0	0	0	0	0	0	0	0	0	0	0	0	0	8.66141	0	0	0	0	0	0	0	0	0
hsa-miR-3619-5p	0	0	0	0	0	0	0	0	0	0	0	0	0	0	0	0	0	0	0	0	0	0	0	0	0	0	0	0	0	0	0	0	0	0	0	0	0	0	0	0	0	0	0	0	0	0	0	0	0
hsa-miR-3620-3p	0	0	0.48944	0	0	0.843013	0.856675	0	0.436591	6.60802	4.41673	6.39052	2.74088	5.17371	7.14938	3.49014	6.34093	0	0	0	0	0	0	0	1.26137	1.36682	1.47781	1.88518	1.23731	1.40574	1.05461	1.1809	1.62911	1.60301	5.00743	0.99488	0	0	2.49616	0	6.64066	1.65918	0.448761	0	1.47363	2.5461	1.64824	0.688934	0
hsa-miR-3620-5p	0	0	0	0	0	0	0	0	0.909564	0	0	0	0	0	0	0	0	0	0	0	0	0	0	0	0	0	0	0	0	0	0	0	0	0	0	0	0	0	1.38675	0	0	0	0	0	0	0	0	0	0
hsa-miR-3621	0	0	0	0	0	0	0	0	0	0	0	0	0	0	0	0	0	0	0	0	0	0	0	0	0	0	0	0	0	0	0	0	0	0	0	0	0	0	0	0	0	0	0	0	0	0	0	0	0
hsa-miR-3622a-3p	0	0	0	0	0	0	0	0	0	0	0	0	0	0	0	0	0	0	0	0	0	0	0	0	0	0	0	0	0	0	0	0	0	0	0	0	0	0	0	0	0	0	0	0	0	0	0	0	0
hsa-miR-3622a-5p	0	0	0	0	0	0	0	0	0	0	0	0	0	0	0	0	0	0	0	0	0	0	0	0	0	0	0	0	0	0	0	0	0	0	0	0	0	0	0	0	0	0	0	0	0	0	0	0	0
hsa-miR-3622b-3p	0	0	0	0	0	0.9233	0	0	0	0	0	0	0	0	0	0	0	0	0	2.51905	0	0	0	5.1992	0	0	0	0	0	0	0	0	0	0	0	1.98976	0	0	0	0	0	2.32286	0	0	0	0	0	0	0
hsa-miR-3622b-5p	0	0	0	0	0	0	0	0	0	0	0	0	0	0	0	0	0	0	0	0	0	0	0	0	0	0	0	0	0	0	0	0	0	0	0	0	0	0	0	0	0	0	0	0	0	0	0	0	0
hsa-miR-362-3p	1.73417	10.2358	7.15806	13.2584	5.38952	3.09105	0	1.01448	16.0447	0.944002	0.576095	0.912931	1.77351	1.10079	1.1439	0	0.827077	114.709	175.111	118.081	75.1975	142.9	24.8925	18.5686	0	0	0	0	0	0	0	0	0	0	5.63336	7.95904	5.82495	11.6349	8.32052	7.62204	13.7921	4.31387	0	0	0	0	0	0	0
hsa-miR-362-5p	27.9635	2.44338	3.85434	4.85518	2.63352	39.8625	15.8485	22.3186	15.1715	109.315	150.937	132.603	143.654	75.404	126.973	48.862	96.9059	203.417	386.467	575.918	203.12	292.751	81.5228	65.8565	2.06406	1.82242	1.74651	2.39931	1.44353	2.10862	2.37287	1.32851	1.4662	1.74873	25.6631	27.525	12.378	35.7359	17.4731	16.2835	25.541	19.5784	0.359008	0	1.37539	2.5461	1.03015	0.574112	0
hsa-miR-363-3p	93.862	26.1508	39.4611	39.5261	38.4004	290.558	41.9771	39.0575	138.727	1301.02	1317.91	1271.26	1867.83	639.999	1866.99	864.059	943.557	133.062	268.368	163.423	132.244	291.593	111.394	75.2646	871.033	870.32	860.356	248.243	350.366	569.766	641.554	575.539	567.909	542.982	108.912	156.196	202.417	170.369	86.256	253.606	122.597	192.465	61.3904	13.206	1127.72	355.605	650.435	211.962	148.816
hsa-miR-363-5p	0	0.462261	1.04006	0.373475	0.979914	0.401435	0	0	0.218295	0.944002	0	0.456466	0.806141	0	0.714938	0	1.37846	0	0	0	0	0	0	0	0	0	0	0	0	0	0	0	0	0	0	0	0	0	0	0	0	0	0	0	0	0	0	0	0
hsa-miR-3646	0	0	0	0	0	0.883156	0	0	0	0	0	0	0	0	0	0	0	0	0	0	0	0	0	0	0	0	0	0	0	0	0	0	0	0	0	0	0	0	0	0	0	0	0	0	0	0	0	0	0
hsa-miR-3648	0	0	0	0	0.551201	8.55056	0	0	0	0	0	0	0	0	0	0	0	9.94144	5.29406	4.72322	16.4224	7.72431	0	0.990324	0	0	0	0	0	0	0	0	0	0	0	1.65813	2.91248	0	2.2188	0	0	0	0	0	0	0	0	0	0
hsa-miR-3649	0	0	0	0	0	0	0	0	0	0	0	0	0	0	0	0	0	0	0	0	0	0	0	0	0	0	0	0	0	0	0	0	0	0	0	0	0	0	0	0	0	0	0	0	0	0	0	0	0
hsa-miR-3650	0	0	0	0	0	0	0	0	0	0	0	0	0	0	0	0	0	0	0	0	0	0	0	0	0	0	0	0	0	0	0	0	0	0	0	0	0	0	0	0	0	0	0	0	0	0	0	0	0
hsa-miR-3651	0	0	0	0	0	1.8466	1.28501	4.56516	0	0	0	0	0	0	0	0	0	6.11781	0	3.14881	5.18603	2.31729	0.933467	1.73307	0	0	0	0	0	0	0	0	0	0	0	0.663254	4.36871	0	0	1.73228	0	1.99102	0.179504	0	0	0	0	0	0
hsa-miR-3652	0	0	0	0	0	0.843013	0	0	0	0	0	0	0	0	0	0	0	0	0	0	0	0	0	0	0	0	0	0	0	0	0	0	0	0	0	0	0	0	2.49616	0	0	0.663673	0	0	0	0	0	0	0
hsa-miR-3653-3p	2.81803	0	0	0	0	0.9233	0	0	3.63826	0	0	0	0	0	0	0	0	9.17672	3.66512	3.4637	12.1007	3.08972	1.86693	0	0	0	0	0	0	0	0	0	0	0	4.3815	0.99488	2.18436	2.4932	0	3.11811	3.06492	0	0	0	0	0	0	0	0
hsa-miR-3653-5p	2.38449	0	0	0	0	0.602152	0	0	0.654886	0	0	0	0	0	0	0	0	7.64727	15.0677	12.2804	12.9651	7.33809	3.73387	2.47581	0	0	0	0	0	0	0	0	0	0	5.00743	4.9744	0	4.9864	4.16026	5.88976	7.15148	2.98653	0	0	0	0	0	0	0
hsa-miR-3654	0	0	0	0	0	0	0	0	0	0	0	0	0	0	0	0	0	0	0	0	0	0	0	0	0	0	0	0	0	0	0	0	0	0	0	0	0	0	0	0	0	0	0	0	0	0	0	0	0
hsa-miR-3655	0	0	0	0	0	0	0	0	0	0	0	0	0	0	0	0	0	0	0	0	0	0	0	0	0	0	0	0	0	0	0	0	0	0	0	0	0	0	0	0	0	0	0	0	0	0	0	0	0
hsa-miR-3656	0	7.19806	8.74874	5.78886	4.59335	2.52904	0	0	3.41996	3.77601	2.11235	2.28233	1.93474	1.10079	2.57378	0	0	64.237	45.2032	37.156	60.5037	46.3459	30.4933	3.71371	0.91736	0	0	0	0.206219	0.790731	0	0	0	0	5.00743	1.65813	4.36871	0	0	1.73228	2.5541	0	6.82116	2.45422	26.4271	5.658	6.79897	8.95614	10.9015
hsa-miR-3657	0	0	0	0	0	0	0	0	0	0	0	0	0	0	0	0	0	0	0	0	0	0	0	0	0	0	0	0	0	0	0	0	0	0	0	0	0	0	0	0	0	0	0	0	0	0	0	0	0
hsa-miR-3658	0	0	0	0	0	0	0	0	0	0	0	0	0	0	0	0	0	0	0	0	0	0	0	0	0	0	0	0	0	0	0	0	0	0	0	0	0	0	0	0	0	0	0	0	0	0	0	0	0
hsa-miR-3659	0	0	0	0	0	0.361291	0	0	0	0	0	0	0	0	0	0	0	0	0	0	0	0	7.15658	13.1218	0	0	0	0	0	0	0	0	0	0	0	0	0	0	0	0	0	0	0	0	0	0	0	0	0
hsa-miR-365a-3p	88.4427	90.5371	95.3184	91.7504	83.8439	21.557	58.6822	52.2457	28.4876	17.5584	9.02548	22.595	7.90018	3.85276	21.3052	6.48169	17.2308	773.903	817.729	732.414	923.978	950.476	280.974	147.311	0.34401	0.227803	0.268693	0.17138	0	0.615013	0.351537	0.885672	0.814557	0.291456	39.4335	49.744	40.0465	87.262	47.4269	42.2677	82.2421	56.744	0	0	0	0	0	0	0
hsa-miR-365a-5p	11.2721	15.7829	13.1537	8.71442	15.3112	1.72617	2.14169	4.05792	0.764034	0	0	0	0	0	0	0	0	0	6.10854	5.66787	6.05037	4.24837	13.0685	15.5976	0	0	0	0	0	0	0	0	0	0	3.12965	1.32651	0	2.4932	0	0	0	1.99102	0	0	0	0	0	0	0
hsa-miR-365b-3p	421.837	375.224	370.934	333.638	329.618	43.2747	118.221	113.622	59.34	16.4256	12.29	26.9315	10.9635	7.59544	22.4491	12.9634	20.2634	1169.27	852.752	743.12	1392.45	1332.83	792.203	274.32	0.91736	0.683408	0.40304	0.342759	0.206219	0.527154	0.790957	0	0.814557	0.291456	13.7704	14.26	14.5624	28.2563	13.8675	12.4724	21.9653	13.6053	0	0	0	0	0.412059	0	0
hsa-miR-365b-5p	0	22.981	18.6599	11.9512	19.2308	2.72976	2.14169	0	1.6736	0	0.384063	0	0	0	0.714938	0	0	0	2.03618	0	0	0	3.73387	4.95162	0	0	0	0	0	0	0	0	0	0	0	0	2.18436	2.4932	1.38675	4.50393	2.5541	1.99102	0	0	0	0	0	0	0
hsa-miR-3660	0	0	0.18354	0.186738	0.183734	0	0	0	0	0	0	0	0	0	0	0	0	0	0	0	0	0	0	0	0	0	0	0	0	0	0	0	0	0	0	0	0	0	0	0	0	0	0	0	0	0	0	0	0
hsa-miR-3661	0	0	0	0	0	0.883156	0	0	0	0	0	0	0	0.440316	0.285975	0	0.413539	0	0	0	0	0	0	0	0.91736	0.227803	0.40304	0	0.206219	1.05431	0.439421	0.590448	0	0	3.75557	0.99488	0	7.4796	2.49616	0	0	1.32735	0	0	0	0	0	0.459289	0
hsa-miR-3662	0	0	0	0	0	0	0	0	0	0	0	0	0	0	0	0	0	0	0	0	0	0	0	0	0	0	0	0	0	0	0	0	0	0	0	0	0	0	0	0	0	0	0	0	0	0	0	0	0
hsa-miR-3663-3p	0	0	0	0	0	0	0	0	0	0	0	0	0	0	0	0	0	0	0	0	0	0	0	0	0	0	0	0	0	0	0	0	0	0	0	0	0	0	0	0	0	0	0	0	0	0	0	0	0
hsa-miR-3663-5p	0	0	0	0	0	0	0	0	0	0	0	0	0	0	0	0	0	0	0	0	0	0	0	0	0	0	0	0	0	0	0	0	0	0	0	0	0	0	0	0	0	0	0	0	0	0	0	0	0
hsa-miR-3664-3p	0	0.462261	0	0.186738	0	1.28459	3.85504	3.55068	0.291061	0	0	0	0	0	0	0	0	3.05891	6.92301	5.66787	6.91471	7.33809	0	0	0	0	0	0	0	0	0	0	0	0	0	0	2.91248	4.15533	1.94145	3.81102	2.04328	2.65469	0	0	0	0	0	0	0
hsa-miR-3664-5p	0	0	0	0	0	0	0	0	0	0	0	0	0	0	0	0	0	0	0	0	0	1.54486	0	0	0	0	0	0	0	0	0	0	0	0	0	0	0	0	1.6641	0	0	0	0	0	0	0	0	0	0
hsa-miR-3665	0	0	0	0	0	0	0	0	0	0	0	0	0	0	0	0	0	0	0	0	0	0	0	0	0	0	0	0	0	0	0	0	0	0	0	0	0	0	0	0	0	0	0	0	0	0	0	0	0
hsa-miR-3666	0	0	0	0	0	0	0	0	0	0	0	0	0	0	0	0	0	0	0	0	0	0	0	0	0	0	0	0	0	0	0	0	0	0	0	0	0	0	0	0	0	0	0	0	0	0	0	0	0
hsa-miR-3667-3p	0	0	0	0	0	1.92689	0	0	0.509356	1.6992	1.92032	1.3694	0	0.99071	1.57286	5.48451	0.689231	0	0	0	0	0	0	0	0	0	0	0	0	0	0	0	0	0	0	0	0	0	0	0	0	0	0	0	0	0	0	0	0
hsa-miR-3667-5p	0	0	0	0	0	0.481722	0	0	0.873182	0.944002	0	0	0	0	0.428963	0	0	0	0	0	0	0	0	0	0	0	0	0	0	0	0	0	0	0	0	0	0	0	0	0	0	0	0	0	0	0	0	0	0
hsa-miR-3668	0	0	0	0	0	0	0	0	0.691269	0	0	0	0	0	0	0	0	0	0	0	0	0	0	0	0	0	0	0	0	0	0	0	0	0	0	0	0	0	0	0	0	0	0	0	0	0	0	0	0
hsa-miR-3669	0	0	0	0	0	0	0	0	0	0	0	0	0	0	0	0	0	0	0	0	0	0	0	0	0	0	0	0	0	0	0	0	0	0	0	0	0	0	0	0	0	0	0	0	0	0	0	0	0
hsa-miR-3670	0	0	0	0	0	0	0	0	0	0	0	0	0	0	0	0	0	0	0	0	0	0	0	0	0	0	0	0	0	0	0	0	0	0	0	0	0	0	0	0	0	0	0	0	0	0	0	0	0
hsa-miR-3671	0	0	0	0	0	0	0	0	0	0	0	0	0	0	0	0	0	0	0	0	0	0	0	0	0	0	0	0	0	0	0	0	0	0	0	0	0	0	0	0	0	0	0	0	0	0	0	0	0
hsa-miR-3672	0	0	0	0	0	0	0	0	0	0	0	0	0	0	0	0	0	0	0	0	0	0	0	0	0	0	0	0	0	0	0	0	0	0	0	0	0	0	0	0	0	0	0	0	0	0	0	0	0
hsa-miR-3673	0	0	0	0	0	0	0	0	0	0	0	0	0	0	0	0	0	0	0	0	0	0	0	0	0	0	0	0	0	0	0	0	0	0	0	0	0	0	0	0	0	0	0	0	0	0	0	0	0
hsa-miR-367-3p	0	0	0	0	0	0	0	0	0	0	0	0	0	0	0	0	0	0	0	0	0	0	0	0	0	0	0	0	0	0	0	0	0	0	0	0	0	0	0	0	0	0	0	0	0	0	0	0	0
hsa-miR-3674	0	0	0	0	0	0	0	0	0	0	0	0	0	0	0	0	0	0	0	0	0	0	0	0	0	0	0	0	0	0	0	0	0	0	0	0	0	0	0	0	0	0	0	0	0	0	0	0	0
hsa-miR-3675-3p	0	0	0	0	0	0	0	0	0	0	0	0	0	0	0.285975	1.49578	0	0	0	0	0	0	0	0	0	0	0	0	0	0	0	0	0	0	0	0	0	0	0	0	0	0	0	0	0	0	0	0	0
hsa-miR-3675-5p	0	0	0	0	0	0	0	0	1.09148	0	0	0	0	0	0	0	0	0	0	0	0	0	0	0	0	0	0	0	0	0	0	0	0	0	0	0	0	0	0	0	0	0	0	0	0	0	0	0	0
hsa-miR-367-5p	0	0	0	0	0	0	0	0	0	0	0	0	0	0	0	0	0	0	0	0	0	0	0	0	0	0	0	0	0	0	0	0	0	0	0	0	0	0	0	0	0	0	0	0	0	0	0	0	0
hsa-miR-3677-3p	0	0	0	0	0	2.16775	0	0	0.436591	0	0	0	0	0	0	0	0	0	0	0	0	0	0	0	0	0	0	0	0	0	0	0	0	0	4.3815	1.32651	0	0	2.2188	0	0	2.98653	0	0	0	0	0	0	0
hsa-miR-3677-5p	0	0	0	0	0	0	0	0	0	0	0	0	0	0	0	0	0	0	0	0	0	0	0	0	0	0	0	0	0	0	0	0	0	0	0	0	0	0	0	0	0	0	0	0	0	0	0	0	0
hsa-miR-3678-3p	0	0	0	0	0	0.602152	0	0	0	0	0	0	0	0	0	0	0	0	0	0	0	0	0	0	0	0.341704	0	0	0	0	0	0	0	0	0	0	0	0	0	0	0	0	0	0	0	0	0	0	0
hsa-miR-3678-5p	0	0	0	0	0	0	0	0	0	0	0	0	0	0	0	0	0	0	0	0	0	0	0	0	0	0	0	0	0	0	0	0	0	0	0	0	0	0	0	0	0	0	0	0	0	0	0	0	0
hsa-miR-3679-3p	0	0	0	0	0	0	0	0	0.181913	0	0	0	0	0	0	0	0	0	0	0	0	0	0	0	0	0	0	0	0	0	0	0	0	0	0	0	0	0	0	0	0	0	0	0	0	0	0	0	0
hsa-miR-3679-5p	0	0	0	0.124492	0	5.25879	0	1.52172	0	0	0	0	0	0	0	0	0	0	2.03618	0	0	0	2.48925	2.22823	0	0	0	0	0	0	0	0	0	0	0	1.98976	0	0	0	0	0	0	0	0	0	0	0	0	0
hsa-miR-3680-3p	0	0	0	0	0	0	0	0	0.291061	0.377601	0	0	0.483685	0	0	0	0	0	0	0	0	0	0	0	0	0	0	0	0	0	0	0	0	0	0	0	0	0	0	0	0	0	0	0	0	0	0	0	0
hsa-miR-3680-5p	0	0	0	0	0	0	0	0	0.363826	0	0	0	0.644913	0	0	0	0	0	0	0	0	0	0	0	0	0	0	0	0	0	0	0	0	0	0	0	0	0	0	0	0	0	0	0	0	0	0	0	0
hsa-miR-3681-3p	0	0	0	0	0	0	0	0	0	0	0	0	0	0	0	0	0	0	0	0	0	0	0	0	0	0	0	0	0	0	0	0	0	0	0	0	0	0	0	0	0	0	0	0	0	0	0	0	0
hsa-miR-3681-5p	0	0	0	0	0	0.762726	0	2.02896	0.472973	0	0	0	0	0	0	0	0	0	0	0	0	0	0	0	0	0	0	0	0	0	0	0	0	0	0	0	4.36871	0	0	0	0	0	0	0	0	0	0	0	0
hsa-miR-3682-3p	0	0	0	0.186738	0.244978	0	0	0	0.800417	0	0	0	0	0	0	0	0	0	0	0	0	0	0	0	0	0	0	0	0	0	0	0	0	0	0	0	0	0	0	0	0	0	0	0	0.196484	0	0	0	0
hsa-miR-3682-5p	0	0	0	0	0	0	0	0	0	0	0	0	0	0	0	0	0	0	0	0	0	0	0	0	0	0	0	0	0	0	0	0	0	0	0	0	0	0	0	0	0	0	0	0	0	0	0	0	0
hsa-miR-3683	0	0	0	0	0	0	0	0	0.436591	0	0	0	0	0	0	0	0	0	0	0	0	0	0	0	0	0	0	0	0	0	0	0	0	0	0	0	0	0	0	0	0	0	0	0	0	0	0	0	0
hsa-miR-3684	0	0	0	0.248983	0	0.361291	0	0	0	0	0	0	0	0.220158	0	0	0	0	0	0	0	0	0	0	0	0	0	0	0	0	0	0	0	0	0	0	0	0	0	0	0	0	0	0	0	0	0	0	0
hsa-miR-3685	0	0	0	0	0	0	0	0	0	0	0	0	0	0	0.428963	0	0.413539	0	0	0	0	0	0	0	0	0	0.268693	0	0	0	0	0	0	0	0	0	0	0	0	0	0	0	0	0	0	0	0	0	0
hsa-miR-3686	0	0	0	0	0	0	0	0	0	0	0	0	0	0	0	0	0	0	0	0	0	0	0	0	0	0	0	0	0	0	0	0	0	0	0	0	0	0	0	0	0	0	0	0	0	0	0	0	0
hsa-miR-3687	0	0.264149	0	0.435721	0.367468	5.94123	0	1.52172	0	0	0	0	0	0	0	0	0	16.0593	10.9954	15.4292	35.4379	8.11053	3.11156	0	0	0	0	0	0	0	0	0	0	0	40.6854	11.2753	35.6778	71.4717	6.65641	27.0236	10.7272	24.5559	0	0	0	0	0	0.229645	0
hsa-miR-3688-3p	0.650314	0	0	0	0.122489	0.521865	0	1.52172	0.618504	3.96481	4.80079	1.82586	3.38579	1.98142	4.71859	2.49296	3.72185	0	0	0.944644	0	1.54486	0	0	1.37604	2.16412	1.07477	1.11397	1.95908	2.10862	2.54864	2.06657	1.79203	2.04019	1.87779	4.9744	3.64059	1.66213	2.2188	10.7402	2.04328	1.99102	0.359008	0	0.687694	0	0	0.688934	0.308534
hsa-miR-3688-5p	0	0	0	0	0	0	0	0	0	0	0	0	0	0	0	0	0	0	0	0	0	0	0	0	0	0	0	0	0	0	0	0	0	0	0	0	0	0	0	0	0	0	0	0	0	0	0	0	0
hsa-miR-3689a-3p	0	0	0	0	0	0	0	0	0	0	0	0	0	0	0	0	0	0	0	0	0	0	0	0	0	0	0	0	0	0	0	0	0	0	0	0	0	0	0	0	0	0	0	0	0	0	0	0	0
hsa-miR-3689a-5p	0	0	0	0	0	0	0	0	0	0	0	0	0	0	0	0	0	0	0	0	0	0	0	0	0	0	0	0	0	0	0	0	0	0	0	0	0	0	0	0	0	0	0	0	0	0	0	0	0
hsa-miR-3689b-3p	0	0	0	0	0	0	0	0	0	0	0	0	0	0	0	0	0	0	0	0	0	0	0	0	0	0	0	0	0	0	0	0	0	0	0	0	0	0	0	0	0	0	0	0	0	0	0	0	0
hsa-miR-3689b-5p	0	0	0	0	0	0	0	0	0	0	0	0	0	0	0	0	0	0	0	0	0	0	0	0	0	0	0	0	0	0	0	0	0	0	0	0	0	0	0	0	0	0	0	0	0	0	0	0	0
hsa-miR-3689c	0	0	0	0	0	0	0	0	0	0	0	0	0	0	0	0	0	0	0	0	0	0	0	0	0	0	0	0	0	0	0	0	0	0	0	0	0	0	0	0	0	0	0	0	0	0	0	0	0
hsa-miR-3689d	0	0	0	0	0	0	0	0	0	0	0	0	0	0	0	0	0	0	0	0	0	0	0	0	0	0	0	0	0	0	0	0	0	0	0	0	0	0	0	0	0	0	0	0	0	0	0	0	0
hsa-miR-3689e	0	0	0	0	0	0	0	0	0	0	0	0	0	0	0	0	0	0	0	0	0	0	0	0	0	0	0	0	0	0	0	0	0	0	0	0	0	0	0	0	0	0	0	0	0	0	0	0	0
hsa-miR-3689f	0	0	0	0	0	0	0	0	0	0	0	0	0	0	0	0	0	0	0	0	0	0	0	0	0	0	0	0	0	0	0	0	0	0	0	0	0	0	0	0	0	0	0	0	0	0	0	0	0
hsa-miR-3690	0	2.24527	5.62856	7.90522	5.26704	0.9233	0	0	4.184	0.377601	0.768126	0.912931	0	0.440316	0.714938	0	0.551385	0	0	0	0	0	0	1.48549	0	0	0	0	0.309328	0.175718	0	0	0	0	3.12965	1.65813	5.82495	0	0	0	0	0.99551	0	0	0	0	0	0	0
hsa-miR-3691-3p	0	0	0	0	0	0	0	0	0	0	0	0	0	0	0	0	0	0	0	0	0	0	0	0	0	0	0	0	0	0	0	0	0	0	0	0	0	0	0	0	0	0	0	0	0	0	0	0	0
hsa-miR-3691-5p	0	0.330186	0	0	0.306223	0.762726	0	0	1.20062	0	0	0	0	0	0	0	0	0	0	0	0	0	0	0	0	0.227803	0	0.257069	0	0	0	0	0	0	0	0	0	0	0	3.81102	0	0	0	0	0.294726	0	0	0	0.411379
hsa-miR-3692-3p	0	0	0	0	0	0	0	0	0	0	0	0	0	0	0.285975	0	0.413539	0	0	0	0	0	0	0	0	0	0	0	0	0	0	0	0	0	0	0	0	0	0	0	0	0	0	0	0	0	0	0	0
hsa-miR-3692-5p	0	0	0	0	0	0	0	0	0	0	0	0	0	0	0	0	0	0	0	0	0	0	0	0	0	0	0	0	0	0	0	0	0	0	0	0	0	0	0	0	0	0	0	0	0	0	0	0	0
hsa-miR-369-3p	11.7057	3.43394	3.85434	4.79293	2.32729	4.65664	3.4267	4.56516	11.606	0	0	0	0	0	0	0	0	804.492	510.674	263.556	357.836	515.211	47.2957	23.5202	0	0	0	0	0	0	0	0	0	0	2.50372	2.32139	3.64059	2.4932	4.99231	4.15748	0	4.31387	0	0	0	0	0	0	0
hsa-miR-369-5p	1.95094	2.04716	3.30372	3.48577	3.24596	4.57636	4.28337	3.55068	1.09148	0	0	0.456466	0	0.330237	0.714938	0	0.551385	418.305	390.132	384.155	222.135	284.641	55.3857	28.4718	0.22934	0	0	0	0	0	0	0.295224	0	0	6.88522	3.64789	0	4.9864	1.1094	2.4252	1.53246	3.31837	0	0	0	0	0	0	0
hsa-miR-370-3p	14.9572	1.71697	0	1.55615	1.22489	6.62367	0	4.56516	0.909564	0	0	0	0	0.440316	0	0	0.827077	12.2356	17.1039	21.4119	12.1007	6.56566	299.954	245.6	0	0	0	0	0.206219	0	0	0	0	0	3.12965	3.97952	6.55307	5.81747	2.49616	4.15748	4.59738	3.98204	0	0	0.589452	0	0	0	0
hsa-miR-370-5p	0	0	0.18354	0	0	4.29535	0	0	0	0	0	0	0	0	0	0	0	0	0	1.25953	0	0	4.97849	6.4371	0	0	0	0	0	0	0	0	0	0	0	0	0	0	0	0	0	0	0	0	0	0	0	0	0
hsa-miR-3713	0	0	0	0	0	0	0	0	0	0	0	0	0	0	0	0	0	0	0	0	0	0	0	0	0	0	0	0	0	0	0	0	0	0	0	0	0	0	0	0	0	0	0	0	0	0	0	0	0
hsa-miR-3714	0	0	0	0	0	0	0	0	0	0	0	0	0	0	0	0	0	0	0	0	0	0	0	0	0	0	0	0	0	0	0	0	0	0	0	0	0	0	0	0	0	0	0	0	0	0	0	0	0
hsa-miR-371a-3p	0	0	0	0	0	0	0	0	0	0	0	0	0	0	0	0	0	0	0	0	0	0	0	0	0	0	0	0	0	0	0	0	0	0	0	0	0	0	0	0	0	0	0	0	0	0	0	0	0
hsa-miR-371a-5p	0	0.396224	0.9177	0.809196	0.857424	0	0	1.52172	0	0	0	0	0	0	0	0	0	0	0	0	0	0	0	0	0	0	0	0	0	0	0	0	0	0	0	0	0	0	0	0	0	0	0	0	0	0	0	0	0
hsa-miR-371b-3p	0	0	0	0	0	0	0	0	0	0	0	0	0	0	0	0	0	0	0	0	0	0	0	0	0	0	0	0.17138	0.206219	0	0	0	0	0	0	0	0	0	0	0	0	0	0	0	0	0	0	0	0
hsa-miR-371b-5p	0	0	0	0.311229	0.183734	0.200717	0	0	0	0	0	0	0.483685	0	0	0	0.413539	0	0	0	0	0	0	0	0.45868	0.341704	0.537386	0	0.412438	0.263577	0.527305	0	0	0	0	0	0	0	0	0	0	0	0	0	0	0	0	0	0
hsa-miR-372-3p	0	0	0	0.186738	0.122489	0	0	0	0	0	0	0	0	0	0	0	0	0	0	0	0	0	0	0	0	0	0	0	0	0	0	0	0	0	0	0	0	0	0	0	0	0	0	0	0	0	0	0	0
hsa-miR-372-5p	0	0	0.12236	0	0	0	0	0	0	0	0	0	0	0	0	0	0	0	0	0	0	0	0	0	0	0	0	0	0	0	0	0	0	0	0	0	0	0	0	0	0	0	0	0	0	0	0	0	0
hsa-miR-373-3p	0	0	0	0	0	0	0	1.01448	0.181913	0	0	0	0	0	0	0	0	0	0	0	0	0	0	0	0	0	0	0	0	0	0	0	0	0	0	0.99488	0	0	1.1094	0	0	1.32735	0	0	0	0	0	0	0
hsa-miR-373-5p	0	0	0	0	0	0	0	0	0	0	0	0	0	0	0	0	0	0	0	0	0	0	0	0	0	0	0	0	0	0	0	0	0	0	0	0	0	0	0	0	0	0	0	0	0	0	0	0	0
hsa-miR-374a-3p	30.5648	75.9429	60.3846	92.3106	57.6312	50.9421	118.221	123.767	1952.14	1.5104	0.960158	1.14116	0	0.770552	0.285975	0	0	26.0007	13.846	9.76132	15.5581	20.0832	22.4032	32.1855	0	0	0.268693	0	0	0.263577	0.175768	0	0	0	274.157	189.359	207.514	207.767	361.665	128.882	195.133	170.564	0	0	0	0	0	0	0
hsa-miR-374a-5p	66.1153	49.4619	47.4145	66.9143	43.6674	68.5249	94.6625	97.8973	448.743	27.1873	13.2502	21.9103	19.6698	7.70552	17.3015	1.99437	2.61908	1667.1	1418.81	1004.16	1739.91	2056.6	427.839	559.285	0.45868	0.455605	0.671733	0.257069	0.618657	0.439295	0.966725	0.442836	0.651646	0	169.001	151.222	155.817	152.085	229.924	144.472	172.146	206.402	0	0	1.27715	0	0.824118	0	0
hsa-miR-374b-3p	9.1044	7.92447	8.19812	8.34094	8.14553	7.74769	6.42506	11.1593	13.0613	0	0	0	0	0	0	0	0	11.4709	12.2171	9.44644	18.1511	15.4486	9.02352	13.3694	0	0	0	0	0	0	0	0	0	0	16.9001	10.2804	15.2905	11.6349	16.0863	13.5118	13.2813	12.6098	0	0	0	0	0	0	0
hsa-miR-374b-5p	229.127	372.186	340.099	352.81	303.528	534.992	50.1155	58.8399	1426.85	214.666	131.158	197.878	281.182	205.077	266.529	37.3944	50.7274	2098.41	1986.5	1401.85	2113.31	2127.28	213.764	327.054	39.9051	5.58116	4.83648	2.14224	7.93943	23.8098	4.39421	25.2416	3.90987	29.1456	158.36	134.972	144.896	235.192	204.13	148.63	174.19	184.169	0	0	52.0683	0	0	0	0
hsa-miR-374c-5p	0	0	0.85652	0.248983	0	0	0	0	0.873182	0.566401	0	0	0	0	0	0	0	8.41199	6.51577	4.40834	6.05037	3.08972	0	0	0	0	0	0	0	0	0	0	0	0	0	0	0	0	0	0	0	0	0	0	0	0	0	0	0
hsa-miR-375	0	18.2263	4.34378	4.41946	3.67468	17772.6	689.195	667.021	396.097	0.377601	0	0.684698	0	0	0	0	0.275692	51596.1	49006.3	52058.4	54956.4	54861.9	251.414	215.148	0.57335	0.341704	0.537386	0.257069	0.515547	0.263577	0.351537	0.295224	0	1.16582	26.289	16.5813	1347.75	215.246	48.5364	19.748	94.5017	120.457	0.538513	0	0.785936	0	0.824118	0.918578	0.925602
hsa-miR-376a-2-5p	0	0	0	0	0	0.361291	0	0	3.67464	0	0	0	0	0	0	0	0	44.3541	19.9546	11.0208	19.8798	20.4694	7.46774	0	0	0	0	0	0	0	0	0	0	0	0	0	0	0	0	0	0	0	0	0	0	0	0	0	0
hsa-miR-376a-3p	0	12.1509	13.0925	26.4545	11.514	5.66023	0	0	5.56653	0	0	0	0	0	0	0	0	188.887	129.094	109.579	104.585	139.81	253.903	140.378	0	0	0	0	0	0	0	0	0	0	0	0	0	0	0	0	0	0	0	0	0	0	0	0	0
hsa-miR-376a-5p	0	0.264149	0.36708	0	0.244978	3.17133	1.71335	1.52172	12.1518	0	0	0	0	0	0	0	0	55.825	41.1308	47.862	48.403	48.2769	4.35618	4.45646	0	0	0	0	0	0	0	0	0	0	4.3815	3.97952	5.09683	0	3.60556	5.19685	2.04328	1.65918	0	0	0	0	0	0	0
hsa-miR-376b-3p	0	4.4245	3.9767	7.22052	3.36845	2.72976	0	1.01448	4.32953	0	0	0	0	0	0	0	0	55.825	37.4657	25.5054	26.7945	30.511	37.3387	28.967	0	0	0	0	0	0	0	0	0	0	8.76301	3.64789	0	0	0	4.50393	0	0	0	0	0	0	0	0	0
hsa-miR-376b-5p	0	0	0.24472	0	0	0	0	0	0.654886	0	0	0	0	0	0	0	0	13.0004	5.29406	4.72322	10.3721	8.11053	2.17809	0	0	0	0	0	0	0	0	0	0	0	0	0	0	0	0	0	0	0	0	0	0	0	0	0	0
hsa-miR-376c-3p	4.5522	52.1034	42.7036	83.9697	38.5229	12.324	6.42506	3.04344	19.683	0	0	0	0	0	0	0	0	1127.97	715.92	520.814	517.739	681.284	324.847	219.109	0	0	0	0	0	0	0	0.295224	0	0	8.76301	9.9488	13.1061	11.6349	5.26966	6.58267	8.68394	4.97755	0	0	0	0	0	0	0
hsa-miR-376c-5p	0.650314	0.198112	0.3059	0.373475	0.489957	0	0	0	1.23701	0	0	0	0	0	0	0	0	117.003	68.0084	40.9346	35.4379	57.9323	4.04503	5.44678	0	0	0	0	0	0	0	0	0	0	0	0	0	0	0	0	0	0	0	0	0	0	0	0	0
hsa-miR-377-3p	1.08386	0.660373	0.97888	1.43165	0.489957	6.26238	2.57002	2.02896	3.3472	0	0	0	0	0	0	0	0	702.019	433.706	290.321	335.363	407.844	41.6949	30.4525	0	0	0	0	0	0	0	0	0	0	2.50372	1.65813	0	4.15533	0	0	0	2.32286	0	0	0	0	0	0	0
hsa-miR-377-5p	1.95094	0.858485	1.2236	1.24492	0.857424	5.70037	0.856675	3.04344	0.472973	0	0	0	0	0	0	0	0.275692	2.29418	4.88683	4.40834	0	3.47594	13.3797	27.9766	0	0	0	0	0	0	0	0	0	0	0	3.31627	6.55307	6.64853	1.94145	3.81102	4.08656	1.65918	0	0	0.294726	0	0.412059	0	0
hsa-miR-378a-3p/378c/378d/378e	35277.2	2598.9	2447.75	2818.31	2309.23	12944.4	6159.06	6067.61	13087	121.021	85.262	118.909	89.6429	31.7027	77.3563	48.3634	85.6025	994.909	1848.44	2185.91	1274.04	1418.18	2146.98	2502.05	85.3144	90.0959	83.1606	75.8354	82.7969	98.7535	92.2783	91.2242	86.3431	93.1201	870.667	1479.39	1759.14	1264.88	843.423	833.574	897.511	941.752	80.3281	34.9434	268.888	104.39	242.909	145.25	68.7002
hsa-miR-378a-5p	640.776	2.8396	2.87546	2.86331	2.51103	87.312	27.8419	39.0575	7.89502	33.2289	19.5872	30.8114	32.2456	16.8421	28.4545	41.3831	37.632	35.9421	87.1485	99.5025	75.1975	62.5669	100.503	52.2396	5.04548	5.12556	5.37386	3.85604	4.63992	4.56867	4.48209	4.87119	4.56152	4.37183	14.3964	17.5762	15.2905	15.7903	7.48847	9.70078	7.6623	11.9461	0.807769	0.350603	1.57187	5.658	1.64824	1.37787	0.411379
hsa-miR-378b	34.2499	15.2546	0	15.5615	12.0039	150.819	0	0	20.4834	0	0	0	0	0	0	0	0	0	0	0	0	0	0	17.3307	0	0	0	0	0	0	0	0	0	0	0	0	0	0	0	0	0	0	0	0	0	0	0	0	0
hsa-miR-378f	93.862	8.98107	6.66862	7.22052	5.94073	80.0059	0	0	72.183	0	0	0	0	0	0	0	0	0	0	0	0	0	18.9805	21.0444	0	0	0	0	0	0	0	0	0	0	0	0	0	0	0	0	0	0	0	0	0	0	0	0	0
hsa-miR-378g	114.239	27.4055	29.4276	25.7075	28.9687	45.0008	0	0	16.4449	0	0	0	0	0	0	0	0	0	0	0	0	0	0	0	0	0	0	0	0	0	0	0	0	0	0	0	0	0	0	0	0	0	0	0	0	0	0	0	0
hsa-miR-378h	81.7228	0	0	0	0	25.8524	0	0	7.60396	0	0	0	0	0	0	0	0	0	0	0	0	0	0	0	0	0	0	0	0	0	0	0	0	0	0	0	0	0	0	0	0	0	0	0	0	0	0	0	0
hsa-miR-378i	8.02054	0	0	0	0	4.49607	0	0	0	0	0	0	0	0	0	0	0	0	0	0	0	0	0	0	0	0	0	0	0	0	0	0	0	0	0	0	0	0	0	0	0	0	0	0	0	0	0	0	0
hsa-miR-378j	0	0	0	0	0	0	0	0	0	0	0	0	0	0	0	0	0	0	0	0	0	0	0	0	0	0	0	0	0	0	0	0	0	0	0	0	0	0	0	0	0	0	0	0	0	0	0	0	0
hsa-miR-379-3p	0	0.396224	0.6118	0.435721	0.244978	0.9233	0	0	0.654886	0	0	0	0.483685	0	0	0	0	16.0593	15.8822	11.0208	4.32169	15.8348	2.17809	11.3887	0	0	0	0	0	0	0	0	0	0	0	1.32651	0	0	1.1094	2.4252	0	0.99551	0	0	0	0	0	0	0
hsa-miR-379-5p	21.8939	27.7357	58.5492	57.9509	56.7737	2.40861	9.42342	8.62308	67.3805	0	0	0	0	0.330237	0.428963	0	0	965.085	810.806	897.097	356.108	676.65	130.997	184.2	0	0	0	0	0	0	0	0	0	0	3.75557	3.64789	6.55307	2.4932	1.6641	4.85039	4.59738	4.97755	0	0	0	0	0	0	0
hsa-miR-380-3p	0	0.264149	0.18354	0.373475	0.244978	1.08387	0.856675	0	0.363826	0	0	0	0	0	0	0	0	11.4709	7.33024	4.40834	1.72868	4.63459	0	4.70404	0	0	0	0	0	0	0	0	0	0	0	0	0	0	0	0	0	0.99551	0	0	0	0	0	0	0
hsa-miR-380-5p	0	0	0	0	0	0.200717	0	0	0.691269	0	0	0	0	0	0	0	0	2.29418	1.22171	1.57441	0	3.08972	0	0	0	0	0	0	0	0	0	0	0	0	0	0	0	0	0	0	0	0	0	0	0	0	0	0	0
hsa-miR-381-3p	53.3258	1.12263	0.79534	1.24492	0.551201	258.323	113.938	119.201	67.2714	0	0.384063	0	0	0	0.428963	0	0	2894.49	2447.08	2230.3	1182.42	1922.58	180.782	348.594	0.22934	0.455605	0	0	0.412438	0.175718	0	0.442836	0.325823	0.291456	116.423	95.5085	123.052	83.1067	80.709	110.173	67.4283	66.3673	0	0	0	0	0	0	0
hsa-miR-381-5p	0	0.792447	0.36708	0.311229	0.428712	1.60574	0	0	0.14553	0	0	0	0	0	0	0	0	4.58836	4.07236	6.61251	0	5.40702	0	1.48549	0	0	0	0	0	0	0	0	0	0	0	0	0	0	0	0	0	0	0	0	0	0	0	0	0
hsa-miR-382-3p	16.4746	24.1696	22.2083	25.583	19.4145	6.66382	2.57002	1.52172	10.2963	0	0	0	0	0	0	0	0	110.885	57.4202	24.2459	80.3835	54.8426	10.5793	14.3597	0	0	0	0	0	0	0	0	0	0	5.00743	6.96416	0	13.2971	5.82436	0	0	5.30938	0	0	0	0	0	0	0
hsa-miR-382-5p	4.76897	34.6696	45.4567	43.7588	32.6434	5.8208	3.4267	1.52172	1.85551	0	0	0	0	0	0	0	0	123.121	134.388	176.963	72.6044	111.616	70.9435	147.063	0	0	0	0	0	0	0	0	0	0	3.12965	0	3.64059	4.9864	3.60556	3.46457	2.04328	4.64571	0	0	0	0	0	0	0
hsa-miR-383-3p	0	0	0	0	0	0	0	0	0	0	0	0	0	0	0	0	0	0	0	0	0	0	0	7.42743	0	0	0	0	0	0	0	0	0	0	0	0	0	0	0	0	0	0	0	0	0	0	0	0	0
hsa-miR-383-5p	0	40.0846	45.212	40.8955	34.7869	1.48531	1.28501	0	0	0	0	0	0	0	0	0	0	6.88254	10.1809	3.4637	12.1007	9.26917	136.286	14.1121	0	0	0	0	0	0	0	0	0	0	0	0	0	0	0	0	0	0	0	0	0	0	0	0	0
hsa-miR-384	0	0	0	0	0	0	0	0	0	0	0	0	0	0	0	0	0	0	0	0	0	0	0	0	0	0	0	0	0	0	0	0	0	0	0	0	0	0	0	0	0	0	0	0	0	0	0	0	0
hsa-miR-3907	0	0	0	0	0	0	0	0	0	0	0	0	0	0	0	0	0	0	0	0	0	0	0	0	0	0	0	0	0	0	0	0	0	0	0	2.32139	0	0	0	0	0	1.32735	0	0	0	0	0	0	0
hsa-miR-3908	0	0	0	0	0	0	0	0	0	0	0	0	0	0	0	0	0	0	0	0	0	0	0	0	0	0	0	0	0	0	0	0	0	0	0	0	0	0	0	0	0	0	0	0	0	0	0	0	0
hsa-miR-3909	8.88763	0.792447	0.97888	0.373475	0.734935	6.66382	12.4218	11.6665	1.41892	5.85281	3.26454	5.47759	6.12667	3.85276	4.28963	9.47324	4.54893	0	3.25789	4.09346	5.18603	3.47594	6.84543	10.646	0.34401	1.13901	1.61216	0.428449	1.34042	1.4936	0.703073	1.47612	0.814557	0.874367	11.8927	9.61718	11.6499	15.7903	7.21112	11.7795	9.70558	9.29142	0.269256	0	0.49121	0	0.412059	0	0.411379
hsa-miR-3910	0	0.330186	0.24472	0.684704	0.673691	0.281004	0	0	0.14553	0	0	0	0	0	0	0	0	0	5.7013	5.35298	4.32169	4.24837	0	1.2379	0	0	0	0	0	0	0	0	0	0	0	0	0	0	0	0	0	0	0	0	0	0	0	0	0
hsa-miR-3911	0	0	0	0	0	0	0	0	0	0	0	0	0	0	0	0	0	0	0	0	0	0	0	0	0	0	0	0	0	0	0	0	0	0	0	0	0	0	0	0	0	0	0	0	0	0	0	0	0
hsa-miR-3912-3p	0	1.12263	0.42826	0.995934	0.734935	3.4122	4.71171	8.11584	12.9886	0	0.384063	0.684698	0.322456	0	0	0	0	9.17672	8.14472	9.13156	8.64339	13.5175	1.86693	1.98065	0	0	0	0	0	0	0	0	0	0	21.2816	16.5813	16.0186	19.1145	30.2312	17.6693	21.9653	19.9102	0	0	0.196484	0	0	0	0
hsa-miR-3912-5p	0	0.132075	0.3059	0.373475	0	0	0	0	0.291061	0	0	0	0	0	0	0	0	0	0	0	0	0	0	0	0	0	0	0	0	0	0	0	0	0	0	0	0	0	0	0	0	0	0	0	0	0	0	0	0
hsa-miR-3913-3p	0	0	0.3059	0	0	0	0	0	0.764034	0	0	0	0	0	0	0	0	0	0	0	0	0	2.17809	0	0	0	0	0	0	0	0	0	0	0	0	0	0	0	0	0	0	0	0	0	0	0	0	0	0
hsa-miR-3913-5p	0	0.594335	0.3059	0.373475	0.367468	1.48531	1.71335	2.5362	5.82121	0.566401	0	0.456466	0.806141	0	0.285975	0	0	8.41199	6.10854	6.61251	6.05037	5.0208	5.6008	4.95162	0.45868	0.569506	0.268693	0.257069	0	0.351436	0.527305	0.442836	0.325823	0.582911	10.0149	6.63254	8.73743	6.64853	10.262	8.31496	13.7921	8.62775	0	0	0.294726	0	0	0	0
hsa-miR-3914	0	2.24527	1.8354	1.61839	1.40863	0.843013	0	0	0	0	0	0	0	0	0	0	0	0	0	0	0	0	0	0	0	0	0	0	0	0	0	0	0	0	0	0	0	0	0	0	0	0	0	0	0	0	0	0	0
hsa-miR-3915	0.867086	0.330186	0	0	0.183734	0	0	0	0	0	0	0	0	0	0	0	0	0	0	0.944644	0	0	0	0	0	0	0	0	0	0	0	0	0	0	0	0	0	0	0	0	0	0	0	0	0	0	0	0	0
hsa-miR-3916	0	0	0	0	0	1.16416	0	0	0.545739	0	0	0	0	0	0	0	0	0	0	0	0	0	4.97849	3.46613	0	0	0	0	0	0	0	0	0	0	0	0	0	0	0	0	0	0	0	0	0	0	0	0	0
hsa-miR-3917	0	0	0	0	0	0.883156	0	0	0.654886	0	0	0	0	0	0	0	0	0	0	0	0	0	0	0	0	0	0	0	0	0	0	0	0	0	0	0	2.18436	0	0	0	0	0	0	0	0	0	0	0	0
hsa-miR-3918	0	0	0	0	0	0	0	0	0	0	0	0	0	0	0	0	0	0	0	0	0	0	0	2.22823	0	0	0	0	0	0	0	0	0	0	0	0	0	0	0	0	0	0	0	0	0.294726	0	0	0	0.411379
hsa-miR-3919	0	0.198112	0	0	0	0	0	0	0	0	0	0	0	0	0	0	0	0	0	0	0	0	0	0	0	0	0	0	0	0	0	0	0	0	0	0	0	0	0	0	0	0	0	0	0	0	0	0	0
hsa-miR-3920	0	0	0	0	0	0	0	0	0.509356	0	0	0	0	0	0	0	0	0	0	0	0	0	0	0	0	0	0	0	0	0	0	0	0	0	0	0	0	0	0	0	0	0	0	0	0	0	0	0	0
hsa-miR-3921	0	0	0	0	0	0	0	0	0	0	0	0	0	0	0	0	0	0	0	0	0	0	0	0	0	0	0	0	0	0	0	0	0	0	0	0	0	0	0	0	0	0	0	0	0	0	0	0	0
hsa-miR-3922-3p	0	0	0	0	0	0	0	0	0	0	0	0	0	0	0	0	0	0	0	0	0	0	0	0	0	0	0	0	0	0	0	0	0	0	0	0	0	0	0	0	0	0	0	0	0	0	0	0	0
hsa-miR-3922-5p	0	0	0	0	0	0	0	0	0	0	0	0	0	0	0	0	0	0	0	0	0	0	0	0	0	0	0	0	0	0	0	0	0	0	0	0	0	0	0	0	0	0	0	0	0	0	0	0	0
hsa-miR-3923	0	0	0	0	0	0	0	0	0	0	0	0	0	0	0	0	0	0	0	0	0	0	0	0	0	0	0	0	0	0	0	0	0	0	0	0	0	0	0	0	0	0	0	0	0	0	0	0	0
hsa-miR-3924	0	0	0	0	0	0	0	0	0	0	0	0	0	0	0	0	0	0	0	0	0	0	0	0	0	0	0	0	0	0	0	0	0	0	0	0.99488	0	0	0	0	3.57574	0	0	0	0	0	0	0	0
hsa-miR-3925-3p	0	0	0	0	0	0	0	0	0	0	0	0	0	0	0	0	0	0	0	0	0	0	0	0	0	0	0	0	0	0	0	0	0	0	0	0	0	0	0	0	0	0	0	0	0	0	0	0	0
hsa-miR-3925-5p	0	0	0	0	0	0	0	0	0.982329	0	0	0	0	0	0	0	0	0	0	0	0	0	0	0	0	0	0	0	0	0	0	0	0	0	0	0	0	0	0	0	0	0	0	0	0	0	0	0	0
hsa-miR-3926	0	0	0	0	0	0	0	0	3.1289	0	0	0	0	0	0	0	0	0	0	0	0	0	1.55578	0	0	0	0	0	0	0	0	0	0	0	0	0	0	0	0	0	0	0	0	0	0	0	0	0	0
hsa-miR-3927-3p	0	0.462261	0.12236	0	0.244978	0	0	0	0	0	0	0	0	0	0	0	0	0	0	0	0	0	0.622312	4.95162	0	0	0	0	0	0	0	0	0	0	0	0	0	0	0	0	0	0	0	0	0	0	0	0	0
hsa-miR-3927-5p	0	0	0	0	0	0	0	0	0	0	0	0	0	0	0	0	0	0	0	0	0	0	0	0	0	0	0	0	0	0	0	0	0	0	0	0	0	0	0	0	0	0	0	0	0	0	0	0	0
hsa-miR-3928-3p	0	10.1697	13.0925	10.5818	10.3503	1.48531	0	0	1.23701	0	0	0	0	0	0.714938	0	0	0	0	0	0	0	0	0	0	0	0	0	0	0	0	0	0	0	0	3.31627	4.36871	5.81747	1.94145	5.5433	0	1.99102	0	0	0	0	0	0.229645	0
hsa-miR-3928-5p	0	0	0	0	0	0	0	0	0	0	0	0	0	0	0	0	0	0	0	0	0	0	0	0	0	0	0	0	0	0	0	0	0	0	0	0	0	0	0	0	0	0	0	0	0	0	0	0	0
hsa-miR-3929	0	0	0	0	0	0	0	0	0	0	0	0	0	0	0	0	0	0	0	0	0	0	0	0	0	0	0	0	0	0	0	0	0	0	0	0	0	0	0	0	0	0	0	0	0	0	0	0	0
hsa-miR-3934-3p	0	0	0	0	0	0.602152	0	0	0	0	0	0	0	0	0	0	0	0	0	0	0	0	0	0	0	0	0	0	0	0	0	0	0	0	0	0	0	0	0	0	0	0	0	0	0	0	0	0	0
hsa-miR-3934-5p	0	0.924522	1.04006	1.36941	0.918669	2.04732	0	0	11.8243	0	0	0	0	0	0	0	0	0	2.44341	1.88929	0	0	2.17809	8.91291	0	0	0	0.257069	0	0	0	0	0	0	15.6482	5.63766	7.28119	6.64853	5.26966	8.66141	5.1082	3.31837	0	0	0	0	0	0	0
hsa-miR-3935	0	0	0	0	0	0	0	0	0	0	0	0	0	0	0	0	0	0	0	0	0	0	0	0	0	0	0	0	0	0	0	0	0	0	0	0	0	0	0	0	0	0	0	0	0	0	0	0	0
hsa-miR-3936	0	0.990559	0.73416	0.248983	0.734935	0	0	0	0	0	0	0	0	0	0	0	0	0	0	0	0	0	0	0	0	0	0	0	0	0	0	0	0	0	0	0	0	0	0	0	0	0	0	0	0	0	0	0	0
hsa-miR-3937	0	0	0	0	0	0	0	0	0	0	0	0	0	0	0	0	0	0	0	0	0	0	0	0	0	0	0	0	0	0	0	0	0	0	0	0	0	0	0	0	0	0	0	0	0	0	0	0	0
hsa-miR-3938	0	0	0	0	0	0	0	0	0	0	0	0	0	0	0	0	0	0	0	0	0	0	0	0	0	0	0	0	0	0	0	0	0	0	0	0	0	0	0	0	0	0	0	0	0	0	0	0	0
hsa-miR-3939	0	0	0	0	0	0	0	0	0	0.377601	0	0	0.483685	0	0	0	0	0	0	0	0	0	0	0	0	0	0.80608	0	0	0.263577	0	0	0	0	0	0	0	0	0	0	0	1.65918	0	0	0.392968	0	0	0	0
hsa-miR-3940-3p	0	0	0.24472	0.186738	0.244978	1.48531	0	0	0.727651	30.7745	33.7976	69.1545	20.9597	24.4375	28.1686	115.673	102.971	0	0	4.40834	0	1.93108	0	4.20888	9.1736	9.90941	12.4942	7.02656	8.55808	10.8067	10.4582	10.4804	9.77469	9.32658	0	3.97952	3.64059	0	2.49616	3.46457	3.57574	2.32286	2.0643	1.86988	17.88	14.4279	15.2462	4.70771	4.11379
hsa-miR-3940-5p	0	0	0	0	0	1.40502	0	0	0	0	0	0	0	0	0	0	0	0	0	0	0	0	0	0	0	0	0	0	0	0	0	0	0	0	0	0	0	0	0	0	0	0	0	0	0	0	0	0	0
hsa-miR-3941	0	0	0	0	0	0	0	0	0.618504	0	0	0	0	0	0	0	0	0	0	0	0	0	0	0	0	0	0	0	0	0	0	0	0	0	0	0	0	0	0	0	0	0	0	0	0	0	0	0	0
hsa-miR-3942-3p	0	0	0	0	0	0.12043	0	0	0	0	0	0	0	0	0	0	0	0	0	0	0	0	0	0	0	0	0	0	0	0	0	0	0	0	0	0	0	0	0	0	0	0	0	0	0	0	0	0	0
hsa-miR-3942-5p	0	0	0	0	0	0.682439	0	0	1.16424	0	0	0.456466	0	0	0	0	0	0	0	0	0	0	0	0	0.22934	0	0	0	0	0	0	0	0	0	0	0	0	0	0	0	0	0	0	0	0	0	0	0	0
hsa-miR-3943	0	0	0.6118	0.497967	0.79618	5.90109	0	0	0	0	0	0	0	0	0	0	0	0	0	1.25953	0	0	0	0	0	0	0	0	0	0	0	0	0	0	13.1445	6.63254	0	0	7.48847	5.5433	0	0	0	0	0	0	0	0	0
hsa-miR-3944-3p	0	0	0	0	0	1.24445	0	0	0	0	0.384063	0	0	0	0	0	0	0	0	0	0	0	0	0	0	0	0	0	0	0.263577	0	0	0	0	0	0	0	0	0	0	0	0	0.179504	0	0	0	0	0	0.411379
hsa-miR-3944-5p	0	0	0	0	0	0	0	0	0.218295	0	0.960158	1.14116	0.806141	3.19229	1.1439	0	1.24062	0	0	0	0	0	0	1.2379	0.22934	0.341704	0.268693	0	0	0	0	0	0	0	0	0	0	0	0	0	0	0	0.179504	0	0	0	0	0	0
hsa-miR-3945	0	0	0	0	0	0	0	0	0	0	0	0	0	0	0	0	0	0	0	0	0	0	0	0	0	0	0	0	0	0	0	0	0	0	0	0	0	0	0	0	0	0	0	0	0	0	0	0	0
hsa-miR-3960	0	0	0	0	0	0	0	0	0	0	0	0	0	0	0	0	0	0	0	0	0	0	0	0	0	0	0	0	0	0	0	0	0	0	0	0	0	0	0	0	0	0	0	0	0	0	0	0	0
hsa-miR-3972	0	0	0	0	0	0	0	0	0	0	0	0	0	0	0	0	0	0	0	0	0	0	0	0	0	0	0	0	0	0	0	0	0	0	0	0	0	0	0	0	0	0	0	0	0	0	0	0	0
hsa-miR-3973	0	0	0	0	0	0	0	0	0	0	0	0	0	0	0	0	0	0	0	0	0	0	0	0	0	0	0	0	0	0	0	0	0	0	0	0	0	0	0	0	0	0	0	0	0	0	0	0	0
hsa-miR-3974	0	0	0	0	0	0	0	0	0	0	0	0	0	0	0	0	0	0	0	0	0	0	0	0	0	0	0	0	0	0	0	0	0	0	0	0	0	0	0	0	0	0	0	0	0	0	0	0	0
hsa-miR-3975	0	0	0	0	0	0	0	0	0	0	0	0	0	0	0	0	0	0	0	0	0	0	0	0	0	0	0	0	0	0	0	0	0	0	0	0	0	0	0	0	0	0	0	0	0	0	0	0	0
hsa-miR-3976	0	0	0	0	0	0	0	0	0	0	0	0	0	0	0	0	0	0	0	0	0	0	0	0	0	0	0	0	0	0	0	0	0	0	0	0	0	0	0	0	0	0	0	0	0	0	0	0	0
hsa-miR-3977	0	0	0	0	0	0	0	0	0	0	0	0	0	0	0	0	0	0	0	0	0	0	0	0	0	0	0	0	0	0	0	0	0	0	0	0	0	0	0	0	0	0	0	0	0	0	0	0	0
hsa-miR-3978	0	0	0	0	0	0	0	0	0	0	0	0	0	0	0	0	0	0	0	0	0	0	0	0	0	0	0	0	0	0	0	0	0	0	0	0	0	0	0	0	0	0	0	0	0	0	0	0	0
hsa-miR-409-3p	10.405	7.85844	8.93228	14.5033	8.45175	143.071	72.8173	74.5643	1.78275	2.07681	5.56892	6.16228	6.12667	15.301	14.2988	18.4479	20.2634	74.1785	111.175	123.434	82.9765	105.051	219.676	477.831	16.2831	13.0986	13.3003	15.3385	18.869	17.2204	16.3464	17.2706	15.6395	14.5728	26.915	45.4329	51.6964	28.2563	36.3329	28.063	28.0951	36.1702	1.07703	0	9.8242	7.0725	7.82912	1.72233	1.33698
hsa-miR-409-5p	5.41929	2.44338	3.24254	2.17861	3.12347	0.843013	12.8501	16.2317	0.327443	0.755202	1.15219	1.59763	2.74088	5.39387	3.86066	2.49296	6.34093	19.1182	27.2848	31.803	24.2015	27.4213	38.2722	78.4832	0	0	0	0	0	0	0	0	0	0	3.75557	0.663254	2.18436	4.15533	0	2.07874	0	0	0	0	0	0	0	0	0
hsa-miR-410-3p	1.08386	1.25471	0.97888	1.74288	1.40863	70.0504	39.8354	49.7095	2.43763	0	0.384063	0	0	0	0.285975	0	0	94.8261	58.642	105.485	71.7401	94.2366	24.8925	28.4718	0.45868	0.683408	0.671733	0.342759	0	0.351436	0.439421	0.590448	0.325823	0.437183	18.7779	14.5916	28.3966	17.4524	16.3637	27.0236	12.2597	17.2555	0	0	0.785936	0	0	0.688934	0
hsa-miR-410-5p	0	0	0	0	0	0	0	0	0	0	0	0	0	0	0	0	0	0	0	0	0	2.31729	0	0	0	0	0	0	0	0	0	0	0	0	0	0	0	0	0	0	0	0	0	0	0	0	0	0	0
hsa-miR-411-3p	0.867086	1.38678	1.34596	1.30716	0.612446	2.08746	0	1.01448	0.982329	0	0.384063	0	0	0.440316	0.285975	0	0.689231	59.6487	42.3525	30.5435	21.6085	39.7802	12.4462	27.2339	0	0	0	0	0	0	0	0	0	0	0	0.99488	0	0	1.6641	1.03937	0	0.99551	0	0	0	0	0	0	0
hsa-miR-411-5p	23.6281	12.2829	14.0102	21.1013	17.0872	135.283	240.726	244.49	42.4585	0	0	0	0	0	0	0	0	1569.98	1398.45	1207.57	619.731	1115.39	149.666	257.237	0	0	0	0	0	0	0	0	0	0	143.338	99.8197	153.633	80.6135	85.1466	95.9685	67.4283	121.452	0	0	0	0	0.412059	0	0
hsa-miR-412-3p	0	0	0	0	0	0	0	0	0	0	0	0	0	0	0	0	0	0	0	0	0	0	0	0	0	0	0	0	0	0	0	0	0	0	0	0	0	0	0	0	0	0	0	0	0	0	0	0	0
hsa-miR-412-5p	0	0.264149	0.42826	0.435721	0.489957	1.44516	2.57002	1.01448	0.291061	0	0	0	0	0	0	0	0	0	0	1.57441	6.05037	4.63459	10.5793	9.1605	0	0	0	0	0	0	0	0	0	0	0	0	0	0	0	2.4252	1.53246	0	0	0	0	0	0	0	0
hsa-miR-421	6.28637	9.11314	11.3183	14.3788	11.1465	65.3134	28.6986	34.9996	5.67568	16.992	8.64142	13.694	15.4779	4.62331	9.15121	11.9662	17.5065	80.2963	109.954	139.178	73.4688	96.9401	43.873	16.3403	12.9577	14.3516	13.7034	10.3685	13.4042	12.6517	15.9949	15.3516	13.0329	10.7839	108.286	98.8248	98.2961	95.5727	160.863	116.756	101.142	123.443	1.34628	0	6.87694	3.9606	3.91456	3.32985	2.57112
hsa-miR-422a	0	0	0	0	0	0	0	0	0	0	0	0	0	0	0	0	0	0	0	0	0	0	0	0	0	0	0	0	0	0	0	0	0	0	0	0	0	0	0	0	0	0	0	0	0	0	0	0	0
hsa-miR-423-3p	1042.45	91.8578	87.2426	58.8846	68.0428	790.666	441.616	444.85	285.276	880.754	819.399	824.605	771.316	591.784	920.983	1199.11	1051.77	1014.03	1180.98	2599.98	1217.85	1081.4	2633.93	3093.28	336.9	323.707	286.427	314.653	307.472	349.327	331.06	335.227	309.369	282.858	1408.97	1226.36	1663.75	1690.39	1609.19	1493.57	1385.86	1430.22	454.864	199.259	453.387	212.741	355.813	210.01	922.928
hsa-miR-423-5p	119.008	8480.24	9340.65	4476.47	9605.54	237.73	325.965	321.083	289.278	654.76	458.763	772.796	518.832	204.637	443.976	2044.72	1993.39	373.951	382.802	586.309	473.658	470.797	715.97	1102.48	713.591	709.833	622.965	542.074	595.148	781.857	722.144	710.456	669.729	641.785	677.255	901.362	838.065	1039.66	792.668	758.047	740.689	1041.97	1329.77	315.309	1810.11	1141.22	1369.07	1619.8	4073.06
hsa-miR-424-3p	12.5727	40.5469	43.4378	48.4895	38.0329	4.29535	6.8534	9.13032	5.56653	13.7824	11.5219	8.67284	4.67562	4.183	10.5811	8.97465	12.4062	18.3534	11.8098	25.5054	11.2364	16.6073	27.6929	7.92259	14.4484	17.0852	14.2407	4.37018	7.83632	14.1453	16.0828	14.9088	14.4991	14.2813	72.6078	77.6007	61.8901	71.4717	90.4163	74.4882	77.1338	92.2506	10.0522	0.93494	54.7208	24.3294	39.7637	18.3716	33.116
hsa-miR-424-5p	7.587	184.64	128.6	268.778	132.227	19.6703	92.9492	94.3467	406.284	10.0064	7.10517	6.84698	2.41842	0.880631	8.0073	2.49296	1.37846	737.196	640.582	547.579	376.852	733.037	116.061	64.8662	0	0	0	0	0	0.175718	0.263652	0	0	0.437183	409.358	320.351	282.51	520.248	578.553	391.496	601.235	315.245	0	0	0.294726	0	0	0	0
hsa-miR-4251	0	0	0	0	0	0	0	0	0	0	0	0	0	0	0	0	0	0	0	0	0	0	0	0	0	0	0	0	0	0	0	0	0	0	0	0	0	0	0	0	0	0	0	0	0	0	0	0	0
hsa-miR-4252	0	0	0	0	0	0	0	0	0	0	0	0	0	0	0	0	0	0	0	0	0	0	0	0	0	0	0	0	0	0	0	0	0	0	0	0	0	0	0	0	0	0	0	0	0	0	0	0	0
hsa-miR-4253	0	0	0	0	0	0	0	0	0	0	0	0	0	0	0	0	0	0	0	0	0	0	0	0	0	0	0	0	0	0	0	0	0	0	0	0	0	0	0	0	0	0	0	0	0	0	0	0	0
hsa-miR-425-3p	10.6218	26.9432	29.6723	23.5289	20.9457	25.5312	29.5553	21.8113	24.8493	34.9281	21.6996	34.6914	29.5048	17.0622	26.5957	14.9578	28.5342	39.0011	43.5742	67.3846	27.6588	35.918	45.4287	78.9783	6.99487	4.44215	4.29909	2.22793	2.1653	3.33864	2.1971	2.65701	2.28076	2.76883	85.7523	83.9016	83.0056	119.674	78.2129	83.1496	100.121	69.022	2.2438	0	7.76112	3.9606	7.21103	3.32985	4.21663
hsa-miR-4254	0	0	0	0	0	0	0	0	0	0	0	0	0	0	0	0	0	0	0	0	0	0	0	0	0	0	0	0	0	0	0	0	0	0	0	0	0	0	0	0	0	0	0	0	0	0	0	0	0
hsa-miR-4255	0	0	0	0	0	0	0	0	0	0	0	0	0	0	0	0	0	0	0	0	0	0	0	0	0	0	0	0	0	0	0	0	0	0	0	0	0	0	0	0	0	0	0	0	0	0	0	0	0
hsa-miR-425-5p	22.1107	35.462	44.4778	35.3556	43.7286	342.464	143.493	103.984	589.725	3106.9	2914.66	3785.24	3589.26	1594.27	3447.86	3356.02	3799.04	931.437	1282.79	1366.27	860.881	906.834	352.851	246.095	1562.15	1704.87	1642.92	991.259	1083.06	1147.35	1166.57	1112.26	1133.21	1074.16	195.916	217.216	366.972	201.118	188.044	309.732	220.164	202.42	20.1942	1.75301	345.222	152.2	206.442	43.9769	38.6696
hsa-miR-4256	0	0	0	0	0	0	0	0	0	0	0	0	0	0	0	0	0	0	0	0	0	0	0	0	0	0	0	0	0	0	0	0	0	0	0	0	0	0	0	0	0	0	0	0	0	0	0	0	0
hsa-miR-4257	0	0	0	0	0	0	0	0	0	0	0	0	0	0	0	0	0	0	0	0	0	0	0	0	0	0	0	0	0	0	0	0	0	0	0	0	0	0	0	0	0	0	0	0	0	0	0	0	0
hsa-miR-4258	0	0	0	0	0	0	0	0	0	0	0	0	0	0	0	0	0	0	0	0	0	0	0	0	0	0	0	0	0	0	0	0	0	0	0	0	0	0	0	0	0	0	0	0	0	0	0	0	0
hsa-miR-4259	0	0	0	0	0	0	0	0	0	0	0	0	0	0	0	0	0	0	0	0	0	0	0	0	0	0	0	0	0	0	0	0	0	0	0	0	0	0	0	0	0	0	0	0	0	0	0	0	0
hsa-miR-4260	0	0	0	0	0	0	0	0	0	0	0	0	0	0	0	0	0	0	0	0	0	0	0	0	0	0	0	0	0	0	0	0	0	0	0	0	0	0	0	0	0	0	0	0	0	0	0	0	0
hsa-miR-4261	0	0	0	0	0	0	0	0	0	0	0	0	0	0	0	0	0	0	0	0	0	0	0	0	0	0	0	0	0	0	0	0	0	0	0	0	0	0	0	0	0	0	0	0	0	0	0	0	0
hsa-miR-4262	0	0	0	0	0	0	0	0	0	0	0	0	0	0	0	0	0	0	0	0	0	0	0	0	0	0	0	0	0	0	0	0	0	0	0	0	0	0	0	0	0	0	0	0	0	0	0	0	0
hsa-miR-4263	0	0	0	0	0	0	0	0	0	0	0	0	0	0	0	0	0	0	0	0	0	0	0	0	0	0	0	0	0	0	0	0	0	0	0	0	0	0	0	0	0	0	0	0	0	0	0	0	0
hsa-miR-4264	0	0	0	0	0	0	0	0	0	0	0	0	0	0	0	0	0	0	0	0	0	0	0	0	0	0	0	0	0	0	0	0	0	0	0	0	0	0	0	0	0	0	0	0	0	0	0	0	0
hsa-miR-4265	0	0	0	0	0	0	0	0	0	0	0	0	0	0	0	0	0	0	0	0	0	0	0	0	0	0	0	0	0	0	0	0	0	0	0	0	0	0	0	0	0	0	0	0	0	0	0	0	0
hsa-miR-4266	0	0	0	0	0	0	0	0	0	0	0	0	0	0	0	0	0	0	0	0	0	0	0	0	0	0	0	0	0	0	0	0	0	0	0	0	0	0	0	0	0	0	0	0	0	0	0	0	0
hsa-miR-4267	0	0	0	0	0	0	0	0	0	0	0	0	0	0	0	0	0	0	0	0	0	0	0	0	0	0	0	0	0	0	0	0	0	0	0	0	0	0	0	0	0	0	0	0	0	0	0	0	0
hsa-miR-4268	0	0	0	0	0	0	0	0	0	0	0	0	0	0	0	0	0	0	0	0	0	0	0	0	0	0	0	0	0	0	0	0	0	0	0	0	0	0	0	0	0	0	0	0	0	0	0	0	0
hsa-miR-4269	0	0	0	0	0	0	0	0	0	0	0	0	0	0	0	0	0	0	0	0	0	0	0	0	0	0	0	0	0	0	0	0	0	0	0	0	0	0	0	0	0	0	0	0	0	0	0	0	0
hsa-miR-4270	0	0	0	0	0	0	0	0	0	0	0	0	0	0	0	0	0	0	0	0	0	0	0	0	0	0	0	0	0	0	0	0	0	0	0	0	0	0	0	0	0	0	0	0	0	0	0	0	0
hsa-miR-4271	0	0	0	0	0	0	0	0	0	0	0	0	0	0	0	0	0	0	0	0	0	0	0	0	0	0	0	0	0	0	0	0	0	0	0	0	0	0	0	0	0	0	0	0	0	0	0	0	0
hsa-miR-4272	0	0	0	0	0	0	0	0	0	0	0	0	0	0	0	0	0	0	0	0	0	0	0	0	0	0	0	0	0	0	0	0	0	0	0	0	0	0	0	0	0	0	0	0	0	0	0	0	0
hsa-miR-4273	0	0	0	0	0	0	0	0	0	0	0	0	0	0	0	0	0	0	0	0	0	0	0	0	0	0	0	0	0	0	0	0	0	0	0	0	0	0	0	0	0	0	0	0	0	0	0	0	0
hsa-miR-4274	0	0	0	0	0	0	0	0	0	0	0	0	0	0	0	0	0	0	0	0	0	0	0	0	0	0	0	0	0	0	0	0	0	0	0	0	0	0	0	0	0	0	0	0	0	0	0	0	0
hsa-miR-4275	0	0	0	0	0	0	0	0	0	0	0	0	0	0	0	0	0	0	0	0	0	0	0	0	0	0	0	0	0	0	0	0	0	0	0	0	0	0	0	0	0	0	0	0	0	0	0	0	0
hsa-miR-4276	0	0	0	0	0	0	0	0	0	0	0	0	0	0	0	0	0	0	0	0	0	0	0	0	0	0	0	0	0	0	0	0	0	0	0	0	0	0	0	0	0	0	0	0	0	0	0	0	0
hsa-miR-4277	0	0	0	0	0	0	0	0	0	0	0	0	0	0	0	0	0	0	0	0	0	0	0	0	0	0	0	0	0	0	0	0	0	0	0	0	0	0	0	0	0	0	0	0	0	0	0	0	0
hsa-miR-4278	0	0	0	0	0	0	0	0	0	0	0	0	0	0	0	0	0	0	0	0	0	0	0	0	0	0	0	0	0	0	0	0	0	0	0	0	0	0	0	0	0	0	0	0	0	0	0	0	0
hsa-miR-4279	0	0	0	0	0	0	0	0	0	0	0	0	0	0	0	0	0	0	0	0	0	0	0	0	0	0	0	0	0	0	0	0	0	0	0	0	0	0	0	0	0	0	0	0	0	0	0	0	0
hsa-miR-4280	0	0	0	0	0	0	0	0	0	0	0	0	0	0	0	0	0	0	0	0	0	0	0	0	0	0	0	0	0	0	0	0	0	0	0	0	0	0	0	0	0	0	0	0	0	0	0	0	0
hsa-miR-4281	0	0	0	0	0	0	0	0	0	0	0	0	0	0	0	0	0	0	0	0	0	0	0	0	0	0	0	0	0	0	0	0	0	0	0	0	0	0	0	0	0	0	0	0	0	0	0	0	0
hsa-miR-4282	0	0	0	0	0	0	0	0	0	0	0	0	0	0	0	0	0	0	0	0	0	0	0	0	0	0	0	0	0	0	0	0	0	0	0	0	0	0	0	0	0	0	0	0	0	0	0	0	0
hsa-miR-4283	0	0	0	0	0	0	0	0	0	0	0	0	0	0	0	0	0	0	0	0	0	0	0	0	0	0	0	0	0	0	0	0	0	0	0	0	0	0	0	0	0	0	0	0	0	0	0	0	0
hsa-miR-4284	0	0	0	0	0	0	0	0	0	0	0	0	0	0	0	0	0	0	38.6874	39.0453	0	0	0	0	0	0	0	0	0	0	0	0	0	0	97.019	18.5711	0	69.8096	0	0	78.6663	0	0	0	0	0	0	0	0
hsa-miR-4285	0	0	0	0	0	0	0	0	0	0	0	0	0	0	0	0	0	0	0	0	0	0	0	0	0	0	0	0	0	0	0	0	0	0	0	0	0	0	0	0	0	0	0	0	0	0	0	0	0
hsa-miR-4286	11.4889	12.0848	8.38166	10.5818	7.04313	50.3801	35.9803	37.5358	33.3628	145.188	101.777	151.775	103.992	61.2039	177.877	73.7916	67.5446	1004.09	364.476	546.004	1191.06	658.111	50.4072	80.4638	2.40807	3.53094	3.76171	0	0.927985	2.89935	2.37287	2.36179	2.44367	2.04019	33.1742	49.744	33.4935	57.3436	32.7274	40.5354	65.8958	28.8698	0.359008	0	1.57187	1.1316	1.23618	0.574112	0
hsa-miR-4287	0	0	0	0	0	0	0	0	0	0	0	0	0	0	0	0	0	0	0	0	0	0	0	0	0	0	0	0	0	0	0	0	0	0	0	0	0	0	0	0	0	0	0	0	0	0	0	0	0
hsa-miR-4288	0	0	0	0	0	0	0	0	0	0	0	0	0	0	0	0	0	0	0	0	0	0	0	0	0	0	0	0	0	0	0	0	0	0	0	0	0	0	0	0	0	0	0	0	0	0	0	0	0
hsa-miR-4289	0	0	0	0	0	0	0	0	0	0	0	0	0	0	0	0	0	0	0	0	0	0	0	0	0	0	0	0	0	0	0	0	0	0	0	0	0	0	0	0	0	0	0	0	0	0	0	0	0
hsa-miR-429	0	8.65088	2.08012	5.04191	2.51103	607.812	28.2703	33.4778	307.978	0	0	0	0	0	0	0	0	4638.07	4623.35	4012.53	4230.07	4640.38	142.821	216.633	0	0	0	0	0	0	0	0	0	0	672.248	439.074	298.529	525.234	812.36	481.921	739.157	551.18	0	0	0	0	0	0	0
hsa-miR-4290	0	0	0	0	0	0	0	0	0	0	0	0	0	0	0	0	0	0	0	0	0	0	0	0	0	0	0	0	0	0	0	0	0	0	0	0	0	0	0	0	0	0	0	0	0	0	0	0	0
hsa-miR-4291	0	0	0	0	0	0	0	0	0	0	0	0	0	0	0	0	0	0	0	0	0	0	0	0	0	0	0	0	0	0	0	0	0	0	0	0	0	0	0	0	0	0	0	0	0	0	0	0	0
hsa-miR-4292	0	0	0	0	0	0	0	0	0	0	0	0	0	0	0	0	0	0	0	0	0	0	0	0	0	0	0	0	0	0	0	0	0	0	0	0	0	0	0	0	0	0	0	0	0	0	0	0	0
hsa-miR-4293	0	0	0	0	0	0	0	0	0	0	0	0	0	0	0	0	0	0	0	0	0	0	0	0	0	0	0	0	0	0	0	0	0	0	0	0	0	0	0	0	0	0	0	0	0	0	0	0	0
hsa-miR-4294	0	0	0	0	0	0	0	0	0	0	0	0	0	0	0	0	0	0	0	0	0	0	0	0	0	0	0	0	0	0	0	0	0	0	0	0	0	0	0	0	0	0	0	0	0	0	0	0	0
hsa-miR-4295	0	0	0	0	0	0	0	0	0	0	0	0	0	0	0	0	0	0	0	0	0	0	0	0	0	0	0	0	0	0	0	0	0	0	0	0	0	0	0	0	0	0	0	0	0	0	0	0	0
hsa-miR-4296	0	0	0	0	0	0	0	0	0	0	0	0	0	0	0	0	0	0	0	0	0	0	0	0	0	0	0	0	0	0	0	0	0	0	0	0	0	0	0	0	0	0	0	0	0	0	0	0	0
hsa-miR-4297	0	0	0	0	0	0	0	0	0	0	0	0	0	0	0	0	0	0	0	0	0	0	0	0	0	0	0	0	0	0	0	0	0	0	0	0	0	0	0	0	0	0	0	0	0	0	0	0	0
hsa-miR-4298	0	0	0	0	0	0	0	0	0	0	0	0	0	0	0	0	0	0	0	0	0	0	0	0	0	0	0	0	0	0	0	0	0	0	0	0	0	0	0	0	0	0	0	0	0	0	0	0	0
hsa-miR-4299	0	0	0	0	0	0	0	0	0	0	0	0	0	0	0	0	0	0	0	0	0	0	0	0	0	0	0	0	0	0	0	0	0	0	0	0	0	0	0	0	0	0	0	0	0	0	0	0	0
hsa-miR-4300	0	0	0	0	0	0	0	0	0	0	0	0	0	0	0	0	0	0	0	0	0	0	0	0	0	0	0	0	0	0	0	0	0	0	0	0	0	0	0	0	0	0	0	0	0	0	0	0	0
hsa-miR-4301	0	0	0	0	0	0	0	0	0	0	0	0	0	0	0	0	0	0	0	0	0	0	0	0	0	0	0	0	0	0	0	0	0	0	0	0	0	0	0	0	0	0	0	0	0	0	0	0	0
hsa-miR-4302	0	0	0	0	0	0	0	0	0	0	0	0	0	0	0	0	0	0	0	0	0	0	0	0	0	0	0	0	0	0	0	0	0	0	0	0	0	0	0	0	0	0	0	0	0	0	0	0	0
hsa-miR-4303	0	0	0	0	0	0	0	0	0	0	0	0	0	0	0	0	0	0	0	0	0	0	0	0	0	0	0	0	0	0	0	0	0	0	0	0	0	0	0	0	0	0	0	0	0	0	0	0	0
hsa-miR-4304	0	0	0	0	0	0	0	0	0	0	0	0	0	0	0	0	0	0	0	0	0	0	0	0	0	0	0	0	0	0	0	0	0	0	0	0	0	0	0	0	0	0	0	0	0	0	0	0	0
hsa-miR-4305	0	0	0	0	0	0	0	0	0	0	0	0	0	0	0	0	0	0	0	0	0	0	0	0	0	0	0	0	0	0	0	0	0	0	0	0	0	0	0	0	0	0	0	0	0	0	0	0	0
hsa-miR-4306	0	0	0	0	0	0	0	0	0	0	0	0	0	0	0	0	0	0	0	0	0	0	0	0	0	0	0	0	0	0	0	0	0	0	0	0	0	0	0	0	0	0	0	0	0	0	0	0	0
hsa-miR-4307	0	0	0	0	0	0	0	0	0	0	0	0	0	0	0	0	0	0	0	0	0	0	0	0	0	0	0	0	0	0	0	0	0	0	0	0	0	0	0	0	0	0	0	0	0	0	0	0	0
hsa-miR-4308	0	0	0	0	0	0	0	0	0	0	0	0	0	0	0	0	0	0	0	0	0	0	0	0	0	0	0	0	0	0	0	0	0	0	0	0	0	0	0	0	0	0	0	0	0	0	0	0	0
hsa-miR-4309	0	0	0	0	0	0	0	0	0	0	0	0	0	0	0	0	0	0	0	0	0	0	0	0	0	0	0	0	0	0	0	0	0	0	0	0	0	0	0	0	0	0	0	0	0	0	0	0	0
hsa-miR-4310	0	0	0	0	0	0	0	0	0	0	0	0	0	0	0	0	0	0	0	0	0	0	0	0	0	0	0	0	0	0	0	0	0	0	0	0	0	0	0	0	0	0	0	0	0	0	0	0	0
hsa-miR-4311	0	0	0	0	0	0	0	0	0	0	0	0	0	0	0	0	0	0	0	0	0	0	0	0	0	0	0	0	0	0	0	0	0	0	0	0	0	0	0	0	0	0	0	0	0	0	0	0	0
hsa-miR-4312	0	0	0	0	0	0	0	0	0	0	0	0	0	0	0	0	0	0	0	0	0	0	0	0	0	0	0	0	0	0	0	0	0	0	0	0	0	0	0	0	0	0	0	0	0	0	0	0	0
hsa-miR-4313	0	0	0	0	0	0	0	0	0	0	0	0	0	0	0	0	0	0	0	0	0	0	0	0	0	0	0	0	0	0	0	0	0	0	0	0	0	0	0	0	0	0	0	0	0	0	0	0	0
hsa-miR-431-3p	1.73417	0.198112	0.73416	0.373475	0.551201	2.24803	0.856675	1.01448	0	0	0	0	0	0	0	0	0	0	0	0	2.59302	1.54486	6.84543	4.70404	0	0	0	0	0	0	0	0	0	0	3.12965	2.65301	2.91248	0	0	3.11811	0	0	0	0	0	0	0	0	0
hsa-miR-4314	0	0	0	0	0	0	0	0	0	0	0	0	0	0	0	0	0	0	0	0	0	0	0	0	0	0	0	0	0	0	0	0	0	0	0	0	0	0	0	0	0	0	0	0	0	0	0	0	0
hsa-miR-4315	0	0	0	0	0	0	0	0	0	0	0	0	0	0	0	0	0	0	0	0	0	0	0	0	0	0	0	0	0	0	0	0	0	0	0	0	0	0	0	0	0	0	0	0	0	0	0	0	0
hsa-miR-431-5p	0	0	0.24472	0	0	4.53621	0.856675	2.5362	0.363826	0	0	0.456466	0	0	0	0	0	0	3.66512	10.3911	6.91471	3.08972	9.64583	6.18952	0	0.227803	0	0	0	0.263577	0.703073	0.295224	0	0	0	1.98976	2.18436	0	0	1.73228	0	0.99551	0	0	0.589452	0	0.412059	0	0
hsa-miR-4316	0	0	0	0	0	0	0	0	0	0	0	0	0	0	0	0	0	0	0	0	0	0	0	0	0	0	0	0	0	0	0	0	0	0	0	0	0	0	0	0	0	0	0	0	0	0	0	0	0
hsa-miR-4317	0	0	0	0	0	0	0	0	0	0	0	0	0	0	0	0	0	0	0	0	0	0	0	0	0	0	0	0	0	0	0	0	0	0	0	0	0	0	0	0	0	0	0	0	0	0	0	0	0
hsa-miR-4318	0	0	0	0	0	0	0	0	0	0	0	0	0	0	0	0	0	0	0	0	0	0	0	0	0	0	0	0	0	0	0	0	0	0	0	0	0	0	0	0	0	0	0	0	0	0	0	0	0
hsa-miR-4319	0	0	0	0	0	0	0	0	0	0	0	0	0	0	0	0	0	0	0	0	0	0	0	0	0	0	0	0	0	0	0	0	0	0	0	0	0	0	0	0	0	0	0	0	0	0	0	0	0
hsa-miR-4320	0	0	0	0	0	0	0	0	0	0	0	0	0	0	0	0	0	0	0	0	0	0	0	0	0	0	0	0	0	0	0	0	0	0	0	0	0	0	0	0	0	0	0	0	0	0	0	0	0
hsa-miR-4321	0	0	0	0	0	0	0	0	0	0	0	0	0	0	0	0	0	0	0	0	0	0	0	0	0	0	0	0	0	0	0	0	0	0	0	0	0	0	0	0	0	0	0	0	0	0	0	0	0
hsa-miR-4322	0	0	0	0	0	0	0	0	0	0	0	0	0	0	0	0	0	0	0	0	0	0	0	0	0	0	0	0	0	0	0	0	0	0	0	0	0	0	0	0	0	0	0	0	0	0	0	0	0
hsa-miR-4323	0	0	0	0	0	0	0	0	0	0	0	0	0	0	0	0	0	0	0	0	0	0	0	0	0	0	0	0	0	0	0	0	0	0	0	0	0	0	0	0	0	0	0	0	0	0	0	0	0
hsa-miR-432-3p	0	0	0.12236	0	0	1.36488	0	0	0	0	0	0	0	0	0	0	0	0	0	2.51905	0	0	0	2.22823	0	0	0	0	0.206219	0	0	0	0	0	0	0	0	0	0	0	0	0	0	0	0	0	0	0	0
hsa-miR-4324	0	0	0	0	0	0	0	0	0	0	0	0	0	0	0	0	0	0	0	0	0	0	0	0	0	0	0	0	0	0	0	0	0	0	0	0	0	0	0	0	0	0	0	0	0	0	0	0	0
hsa-miR-4325	0	0	0	0	0	0	0	0	0	0	0	0	0	0	0	0	0	0	0	0	0	0	0	0	0	0	0	0	0	0	0	0	0	0	0	0	0	0	0	0	0	0	0	0	0	0	0	0	0
hsa-miR-432-5p	11.9224	157.367	231.26	192.464	236.282	64.0288	8.56675	11.6665	7.89502	0	0	0	0	0	0	0	0	34.4127	35.4295	52.2703	34.5735	39.394	81.2117	106.955	0	0.227803	0	0	0	0	0	0	0	0	8.13708	5.30603	8.73743	5.81747	4.16026	5.5433	3.57574	4.31387	0	0	1.67011	2.2632	1.64824	0	0
hsa-miR-4326	1.73417	0.330186	0	0.497967	0.367468	6.06166	2.14169	2.5362	2.83784	49.6545	68.9393	43.5925	31.7619	49.6456	62.1996	62.324	40.6646	7.64727	9.77366	14.1697	12.1007	6.56566	4.04503	0	10.435	11.9596	9.53861	7.45501	10.4141	8.96162	10.2824	7.97104	9.28595	8.30648	11.8927	0	8.00931	13.2971	0	7.27559	10.2164	6.63673	0	0	2.84902	2.5461	3.91456	0.459289	1.8512
hsa-miR-4327	0	0	0	0	0	0	0	0	0	0	0	0	0	0	0	0	0	0	0	0	0	0	0	0	0	0	0	0	0	0	0	0	0	0	0	0	0	0	0	0	0	0	0	0	0	0	0	0	0
hsa-miR-4328	0	0	0	0	0	0	0	0	0	0	0	0	0	0	0	0	0	0	0	0	0	0	0	0	0	0	0	0	0	0	0	0	0	0	0	0	0	0	0	0	0	0	0	0	0	0	0	0	0
hsa-miR-4329	0	0	0	0	0	0	0	0	0	0	0	0	0	0	0	0	0	0	0	0	0	0	0	0	0	0	0	0	0	0	0	0	0	0	0	0	0	0	0	0	0	0	0	0	0	0	0	0	0
hsa-miR-4330	0	0	0	0	0	0	0	0	0	0	0	0	0	0	0	0	0	0	0	0	0	0	0	0	0	0	0	0	0	0	0	0	0	0	0	0	0	0	0	0	0	0	0	0	0	0	0	0	0
hsa-miR-433-3p	3.90189	15.1225	21.9024	14.6278	22.6605	6.02152	0	0	0.363826	0	0.576095	0.912931	0	0.550394	0	0	0	32.1185	20.769	68.6441	25.9302	27.8075	23.6478	48.2783	0	0	0	0	0	0	0	0	0	0	0	1.32651	5.09683	1.66213	0	4.15748	1.02164	0.99551	0	0	0.392968	0	0	0	0
hsa-miR-433-5p	0	0.198112	0.24472	0.311229	0.122489	0.642296	0	0	0	0	0	0	0	0	0	0	0	0	0	0	0	0	0.622312	2.72339	0	0	0	0	0	0	0	0	0	0	0	0	0	0	0	0	0	0	0	0	0	0	0	0	0
hsa-miR-4417	0	0	0	0	0	0	0	0	0	0	0	0	0	0	0	0	0	0	0	0	0	0	0	0	0	0	0	0	0	0	0	0	0	0	0	0	0	0	0	0	0	0	0	0	0	0	0	0	0
hsa-miR-4418	0	0	0	0	0	0	0	0	0	0	0	0	0	0	0	0	0	0	0	0	0	0	0	0	0	0	0	0	0	0	0	0	0	0	0	0	0	0	0	0	0	0	0	0	0	0	0	0	0
hsa-miR-4419a	0	0	0	0	0	0	0	0	0	0	0	0	0	0	0	0	0	0	0	0	0	0	0	0	0	0	0	0	0	0	0	0	0	0	0	0	0	0	0	0	0	0	0	0	0	0	0	0	0
hsa-miR-4419b	0	0	0	0	0	0	0	0	0.472973	0	0	0	0	0	0	0	0	0	0	0	0	10.814	0	0	0	0	0	0	0	0	0	0	0	0	0	0	0	0	0	0	0	0	0	0	0	0	0	0	0
hsa-miR-4420	0	0	0	0	0	0	0	0	0	0	0	0	0	0	0	0	0	0	0	0	0	0	0	0	0	0	0	0	0	0	0	0	0	0	0	0	0	0	0	0	0	0	0	0	0	0	0	0	0
hsa-miR-4421	0	0.72641	0.42826	0.809196	0.244978	0.562009	0	0	0.545739	0	0	0	0	0	0	0	0	0	0	0	0	0	0	0	0	0	0	0	0	0	0	0	0	0	0	0	0	0	0	0	3.57574	0	0	0	0	0	0	0	0
hsa-miR-4422	0	0	0	0	0	0	0	0	0	0	0.768126	0	0	0	0	0	0.551385	0	0.814472	0	0	0	0	0	0	0	0	0	0	0	0	0	0	0	0	0	5.09683	0	0	0	0	0	0	0	0	0	0	0	0
hsa-miR-4423-3p	0	0	0	0	0	0	0	0	1.30977	0	0	0	0	0	0	0	0	0	0	0	0	0	2.8004	6.93227	0	0	0	0	0	0	0	0	0	0	0	1.32651	0	0	0	0	2.5541	0	0	0	0	0	0	0	0
hsa-miR-4423-5p	0	0	0	0.186738	0	0.481722	0	0	3.1289	0	0	0	0	0	0	0	0	0	0	0	0	0	0	3.21855	0	0	0	0	0	0	0	0	0	0	3.12965	1.65813	0	0	1.1094	0	6.12984	0	0	0	0	0	0	0	0
hsa-miR-4424	0	0	0	0	0	2.89033	0	0	0.509356	0	0	0	0	0	0	0	0	0	0	0	0	0	0	0	0	0	0	0	0	0	0	0	0	0	0	0.99488	3.64059	4.9864	0	3.81102	3.06492	0	0	0	0	0	0	0	0
hsa-miR-4425	0	0.132075	0.18354	0.124492	0	0	0	0	0	0	0	0	0	0	0	0	0	0	0	0	0	0	0	0	0	0	0	0	0	0	0	0	0	0	0	0	0	0	0	0	0	0	0	0	0	0	0	0	0
hsa-miR-4426	0	0.132075	0	0	0	0	0	0	0	0	0	0	0	0	0	0	0	0	0.814472	0	1.72868	1.93108	0	0	0	0	0	0	0	0	0	0	0	0	0	0	0	0	0	0	0	0	0	0	0	0	0	0	0
hsa-miR-4427	0	0	0	0	0	0	0	0	0	0	0	0	0	0	0	0	0	0	0	0	0	0	0	0	0	0	0	0	0	0	0	0	0	0	0	0	0	0	0	0	0	0	0	0	0	0	0	0	0
hsa-miR-4428	0	0.396224	0	0	0	0	0	0	0	0	0	0	0	0	0	0	0	0	0	0	0	0	0	0	0	0	0	0	0	0	0	0	0	0	0	0	0	0	0	0	0	0	0	0	0	0	0	0	0
hsa-miR-4429	0	9.70748	11.1348	0	0	0	0	0	0	0	0	0	0	0	0	0	0	0	0	0	0	0	0	0	0	0	0	0	0	0	0	0	0	0	0	0	0	0	0	0	0	0	0	0	0	0	0	0	0
hsa-miR-4430	0	0	0	0	0	0.963443	0	0	0	0	0	0	0	0	0	0	0	0	0	0	0	0	0	0	0	0	0	0	0	0	0	0	0	0	0	0	0	0	0	0	0	0	0	0	0	0	0	0	0
hsa-miR-4431	0	0	0	0.186738	0	0	0	0	0	0	0	0	0	0	0	0	0	0	0	0	2.59302	0	0	0	0	0	0	0	0	0	0	0	0	0	0	0	0	0	0	0	0	0	0	0	0	0	0	0	0
hsa-miR-4432	0	0	0	0	0	0	0	0	0	0	0	0	0	0	0	0	0	0	0	0	0	0	0	0	0	0	0	0	0	0	0	0	0	0	0	0	0	0	0	0	0	0	0	0	0	0	0	0	0
hsa-miR-4433a-3p	0	0.330186	0.73416	0.248983	0.612446	0	0	0	0	0	0	0	0	0	0	0	0	0	0	0	0	0	0	0	0	0	0	0	0	0	0	0	0	0	0	0	0	0	0	0	0	0	0	0	0	0	0	0	0
hsa-miR-4433a-5p	0	0	0	0	0	0	0	0	0	6.23042	6.52907	0	3.22456	0	7.14938	0.997183	0.275692	0	0	0	0	0	0	0	0	0	0	0	0	0	0	0	0	0	0	0	0	0	0	0	0	0	0.179504	0	0.49121	0	0	0	0
hsa-miR-4433b-3p	0	1.78301	5.99564	1.68064	4.89957	0	0	0	0.254678	0	0	0	0	0	0	0	0	0	0	0	0	0	0	0	0	0	0	0	0	0	0	0	0	0	0	0	1.45624	0	0	0	0	0	0	0	0	0	0	0.574112	0
hsa-miR-4433b-5p	0	0.858485	1.16242	0.684704	1.6536	0	0	0	0.436591	32.8513	16.3227	24.6491	16.1228	29.0608	37.1768	41.8817	14.0603	0	0	0	0	0	0	0	2.2934	3.07533	2.68693	2.57069	2.1653	2.10862	2.02133	2.65701	1.4662	1.16582	5.63336	1.98976	8.00931	8.31067	0	2.07874	0	0	4.48761	0.818073	13.4592	7.9212	9.0653	10.334	7.50766
hsa-miR-4434	0	0	0	0	0	0.361291	0	0	0.472973	0	0	0	0	0	0	0	0	0	0	0	0	0	0	0	0	0	0	0	0	0	0	0	0	0	0	0	0	0	0	0	0	0	0	0	0	0	0	0	0
hsa-miR-4435	0	0	0	0.186738	0.122489	0	0	0	0	0.566401	0	0	0	0	0.428963	0	1.37846	0	0	0	0	0	0	0	6.19218	6.15067	5.23952	4.02742	5.36169	6.67728	5.71247	5.46164	4.2357	5.53766	0	0	0	0	0	5.5433	8.17312	0	0.448761	0	1.57187	0	1.64824	0.803756	1.02845
hsa-miR-4436a	0	0	0	0	0	0	0	0	0	0	0	0	0	0	0	0	0	0	0	0	0	0	0	0	0	0	0	0	0	0	0	0	0	0	0	0	0	0	0	0	0	0	0	0	0	0	0	0	0
hsa-miR-4436b-3p	0	0	0	0	0	0	0	0	0.654886	0	0	0	0	0	0	0	0	0	0	0	0	0	0	1.73307	0	0	0	0	0	0	0	0	0	0	0	0	0	0	0	0	0	0	0	0	0	0	0	0	0
hsa-miR-4436b-5p	0	0	0	0	0	0	0	0	0	0	0	0	0	0	0	0	0	0	0	0	0	0	0	0	0	0	0	0	0	0	0	0	0	0	0	0	0	0	0	0	0	0	0	0	0	0	0	0	0
hsa-miR-4437	0	0	0	0	0	0.240861	0	0	0	0	0	0	0	0	0	0	0	0	0	0	0	0	0	0	0	0	0	0	0	0	0	0	0	0	0	0	0	0	0	0	0	0	0	0	0	0	0	0	0
hsa-miR-4438	0	0	0	0	0	0	0	0	0	0	0	0	0	0	0	0	0	0	0	0	0	0	0	0	0	0	0	0	0	0	0	0	0	0	0	0	0	0	0	0	0	0	0	0	0	0	0	0	0
hsa-miR-4439	0	0	0	0	0	0	0	0	0	0	0	0	0	0	0	0	0	0	0	0	0	0	0	0	0	0	0	0	0	0	0	0	0	0	0	0	0	0	0	0	0	0	0	0	0	0	0	0	0
hsa-miR-4440	0	0	0.18354	0	0.244978	0	0	0	0	0	0	0	0	0	0	0	0.275692	0	0	0	0	0	0	0	0	0	0	0	0	0	0	0	0	0	0	0	0	0	0	0	0	0	0	0	0	0	0	0.574112	0
hsa-miR-4441	0	0	0	0	0	0	0	0	0	0	0	0	0	0	0	0	0	0	0	0	0	0	0	0	0	0	0	0	0	0	0	0	0	0	0	0	0	0	0	0	0	0	0	0	0	0	0	0	0
hsa-miR-4442	0	0	0	0	0	1.2043	0	0	0.545739	0	0	0	0	0	0	0	0	0	0	0	0	0	0	0	0	0	0	0	0	0	0	0	0	0	0	0	0	0	0	0	0	0	0	0	0	0	0	0	0
hsa-miR-4443	0	7.2641	9.97234	6.97154	10.779	3.29176	0	0	3.27443	2.83201	3.45657	0	2.09597	0	5.86249	0	0	57.3545	37.8729	55.734	46.6743	33.987	0	0	0	0	0	0	0	0	0	0	0	0	0	0	0	0	0	2.77165	0	0	0	0	1.1789	0	0	0	0
hsa-miR-4444	0	0	0	0	0.244978	0.963443	0	0	0	0	0	0	0	0	0.285975	0	0	0	0	0	0	0	0	0	0	0	0	0	0	0	0	0	0	0.291456	0	0	0	0	0	1.38583	0	0	0	0	0	0	0	0	0
hsa-miR-4445-3p	0	0	0	0	0	0	0	0	0	0	0	0	0	0	0	0	0	0	0	0	0	0	0	0	0	0	0	0	0	0	0	0	0	0	0	0	0	0	0	0	0	0	0	0	0	0	0	0	0
hsa-miR-4445-5p	0	0	0	0	0	0	0	0	0	0	0	0	0	0	0	0	0	0	0	0	0	0	0	0	0	0	0	0	0	0	0	0	0	0	0	0	0	0	0	0	0	0	0	0	0	0	0	0	0
hsa-miR-4446-3p	0	1.32075	1.10124	0.497967	0.79618	2.28818	0	0	0.873182	0	0	0	0	0	0	0	0	0	0	0	0	0	0	0	0	0	0	0	0	0.351436	0	0	0	0	0	0	0	0	0	0	0	0	0.538513	0	0.98242	0.5658	1.23618	1.0334	0
hsa-miR-4446-5p	0	0	0	0	0	0	0	0	0	0	0	0	0	0	0	0	0	0	0	0	0	0	0	0	0	0	0	0	0	0	0.175768	0	0	0	0	0	0	0	0	0	0	0	0	0	0	0	0	0	0
hsa-miR-4447	0	0	0	0	0	0	0	0	0	0	0	0	0	0	0	0	0	0	0	0	0	0	0	0	0	0	0	0	0	0	0	0	0	0	0	0	0	0	0	0	0	0	0	0	0	0	0	0	0
hsa-miR-4448	0	0	0	0	0	1.68603	0	0	0	0	0	0	0	0	0	0	0	0	0	0	0	0	0	0	0	0	0	0	0	0	0	0	0	0	0	0	0	0	0	0	0	0	0	0	0	0	0	0	0
hsa-miR-4449	0	0	0	0	0	1.5656	0	0	2.87422	0	0	0	0	0	0	0	0	0	2.03618	2.51905	6.91471	3.86216	1.55578	4.45646	0	0	0	0	0	0	0	0	0	0	0	0	0	0	0	0	0	0	0	0	0	0	0	0	0
hsa-miR-4450	0	0	0	0	0	0	0	0	0	0	0	0	0	0	0	0	0	0	0	0	0	0	0	0	0	0	0	0	0	0	0	0	0	0	0	0	0	0	0	0	0	0	0	0	0	0	0	0	0
hsa-miR-4451	0	0	0	0	0	0	0	0	0	0	0	0	0	0	0	0	0	0	0	0	0	0	0	0	0	0	0	0	0	0	0	0	0	0	0	0	0	0	0	0	0	0	0	0	0	0	0	0	0
hsa-miR-4452	0	0	0	0	0	0	0	0	0	0	0	0	0	0	0	0	0	0	0	0	0	0	0	0	0	0	0	0	0	0	0	0	0	0	0	0	0	0	0	0	0	0	0	0	0	0	0	0	0
hsa-miR-4453	0	0	0	0	0	0	0	0	0	0	0	0	0	0	0	0	0	0	0	0	0	0	0	0	0	0	0	0	0	0	0	0	0	0	0	0	0	0	0	0	0	0	0	0	0	0	0	0	0
hsa-miR-4454	23.1945	48.6695	34.1384	45.7507	31.9697	114.007	190.182	220.142	64.3608	522.033	498.898	374.53	434.832	835.169	537.633	303.642	399.616	2843.25	603.116	190.818	3158.29	1751.87	64.0981	142.607	10.2056	8.8843	6.71733	0	7.32077	6.94086	7.64592	4.57597	5.53899	6.55775	22.5334	31.8362	26.9404	35.7359	26.071	19.748	32.1817	20.242	0	0	0	0	0	0	0
hsa-miR-4455	0	0	0	0	0	0	0	0	0	0	0	0	0	0	0	0	0	0	0	0	0	0	0	0	0	0	0	0	0	0	0	0	0	0	0	0	0	0	0	0	0	0	0	0	0	0	0	0	0
hsa-miR-4456	0	0	0	0	0	0	0	0	0	0	0	0	0	0	0	0	0	0	0	0	0	0	0	0	0	0	0	0	0	0	0	0	0	0	0	0	0	0	0	0	0	0	0	0	0	0	0	0	0
hsa-miR-4457	0	0	0	0	0	0	0	0	0	0	0	0	0	0	0	0	0	0	0	0	0	0	0	0	0	0	0	0	0	0	0	0	0	0	0	0	0	0	0	0	0	0	0	0	0	0	0	0	0
hsa-miR-4458	0	0	0	0	0	0	0	0	0	0	0	0	0	0	0	0	0	0	0	0	0	0	0	0	0	0	0	0	0	0	0	0	0	0	0	0	0	0	0	0	0	0	0	0	0	0	0	0	0
hsa-miR-4459	0	0	0	0	0	0	0	0	0	0	0	0	0	0	0	0	0	0	0	0	0	0	0	0	0	0	0	0	0	0	0	0	0	0	0	0	0	0	0	0	0	0	0	0	0	0	0	0	0
hsa-miR-4460	0	0	0	0	0	0	0	0	0	0	0	0	0	0	0	0	0	6.11781	2.44341	4.72322	9.50772	5.40702	0	0	0	0	0	0	0	0	0	0	0	0	0	0	0	0	0	0	0	0	0	0	0	0	0	0	0
hsa-miR-4461	0	0	0	0	0	1.72617	0	0	2.2921	0	0	0	0	0	0	0	0	0	0	0	0	11.2002	0	2.47581	0	0	0	0	0	0	0	0	0	0	5.63336	1.65813	5.09683	0	2.2188	0	0	0	0	0	0	0	0	0	0
hsa-miR-4462	0	0	0	0	0	0	0	0	0	0	0	0	0	0	0	0	0	0	0	0	0	0	0	0	0	0	0	0	0	0	0	0	0	0	0	0	0	0	0	0	0	0	0	0	0	0	0	0	0
hsa-miR-4463	0	0.198112	0	0	0	0	0	0	0	0	0	0	0	0	0	0	0	0	0	0	0	0	0	0	0	0	0	0	0	0	0	0	0	0	0	0	0	0	0	0	0	0	0	0	0	0	0	0	0
hsa-miR-4464	0	0	0	0	0	0.441578	0	0	0	0	0	0	0	0	0	0	0	0	0	0	0	0	0	0	0	0	0	0	0	0	0	0	0	0	0	0	0	0	0	0	0	0	0	0	0	0	0	0	0
hsa-miR-4465	0	0	0	0	0	0	0	0	0	0	0	0	0	0	0	0	0	0	0	0	0	0	0	0	0	0	0	0	0	0	0	0	0	0	0	0	0	0	0	0	0	0	0	0	0	0	0	0	0
hsa-miR-4466	0	0	0	0	0	3.81363	0	0	0	0	0	0	0	0	0	0	0	0	0	0	0	0	0	0	0	0	0	0	0	0	0	0	0	0	0	0	0	0	0	0	0	0	0	0	0	0	0	0	0
hsa-miR-4467	0	0	0	0	0.489957	0	0	0	0	0	0	0	0	0	0	0	0	0	0	0	0	0	0	0	0	0	0	0	0	0	0	0	0	0	0	0	0	0	0	0	0	0	0.269256	0.233735	0	0	0	0.229645	1.23414
hsa-miR-4468	0	0	0	0	0	0	0	0	0	0	0	0	0	0	0	0	0	0	0	0	0	0	0	0	0	0	0	0	0	0	0	0	0	0	0	0	0	0	0	0	0	0	0	0	0	0	0	0	0
hsa-miR-4469	0	0.528298	0	0	0	0	0	0	0	0	0	0	0	0	0	0	0	0	0	0	0	0	0	2.47581	0	0	0	0	0	0	0	0	0	0	0	0	0	0	0	0	0	0	0	0	0	0	0	0	0
hsa-miR-4470	0	0	0	0	0	0	0	0	0	0	0	0	0	0	0	0	0	0	0	0	0	0	0	0	0	0	0	0	0	0	0	0	0	0	0	0	0	0	0	0	0	0	0	0	0	0	0	0	0
hsa-miR-4471	0	0	0	0	0	0	0	0	0	0	0	0	0	0	0	0	0	0	0	0	0	0	0	0	0	0	0	0	0	0	0	0	0	0	0	0	0	0	0	0	0	0	0	0	0	0	0	0	0
hsa-miR-4472	0	0	0	0	0	0	0	0	0	0	0	0	0	0	0	0	0	0	0	0	0	0	0	0	0	0	0	0	0	0	0	0	0	0	0	0	0	0	0	0	0	0	0	0	0	0	0	0	0
hsa-miR-4473	0	0	0.18354	0	0	1.2043	0	0	0.436591	0	0.960158	0.456466	0.967369	0.99071	1.42988	1.49578	0.275692	0	2.85065	2.20417	1.72868	2.31729	1.24462	0	0.22934	0	0.671733	0.428449	0.412438	0.527154	0.263652	0.442836	0	0	0	1.32651	2.91248	0	2.77351	2.77165	5.61902	0	0	0	0.196484	0	0	0	0
hsa-miR-4474-3p	0	0	0	0	0	0	0	0	0	0	0	0	0	0	0	0	0	0	1.62894	2.83393	0	1.15865	0	0	0	0	0	0	0	0	0	0	0	0	0	0	0	0	0	0	0	0	0	0	0	0	0	0	0
hsa-miR-4474-5p	0	0	0	0	0	0	0	0	0	0	0	0	0	0	0	0	0	0	0	0	0	0	0	0	0	0	0	0	0	0	0	0	0	0	0	0	0	0	0	0	0	0	0	0	0	0	0	0	0
hsa-miR-4475	0	0	0	0	0	0	0	0	0	0	0	0	0	0	0	0	0	0	0	0	0	0	0	0	0	0	0	0	0	0	0	0	0	0	0	0	0	0	0	0	0	0	0	0	0	0	0	0	0
hsa-miR-4476	0	0	0	0	0	0	0	0	0	0	0	0	0	0	0	0	0	0	0	0	0	0	0	0	0	0	0	0	0	0	0	0	0	0	0	0	0	0	0	0	0	0	0	0	0	0	0	0	0
hsa-miR-4477a	0	0	0	0	0	0	0	0	0	0	0	0	0	0	0	0	0	0	0	0	0	0	0	0	0	0	0	0	0	0	0	0	0	0	0	0	0	0	0	0	0	0	0	0	0	0	0	0	0
hsa-miR-4477b	0	0	0	0	0	0.481722	0	0	0.472973	0	0	0	0	0	0	0	0	0	0	0	0	0	0	0	0	0	0	0	0	0	0	0	0	0	0	0	0	0	0	0	0	0	0	0	0	0	0	0	0
hsa-miR-4478	0	0	0	0	0	0	0	0	0	0	0	0	0	0	0	0	0	0	0	0	0	0	0	0	0	0	0	0	0	0	0	0	0	0	0	0	0	0	1.38675	0	0	1.65918	0	0	0	0	0	0	0
hsa-miR-4479	0	0	0	0	0	2.4889	0	0	0	0	0	0	0	0.330237	0	0	0	0	0	0	0	0	0	0	0	0	0	0	0.206219	0	0	0	0	0	0	0	0	0	0	0	0	0	0	0	0	0	0	0	0
hsa-miR-448	0	0.264149	0	0.311229	0.306223	0	0	0	0	0	0	0	0	0	0	0	0	0	0	0	0	0	0	0	0	0	0	0	0	0	0	0	0	0	0	0	0	0	0	0	0	0	0	0	0	0	0	0	0
hsa-miR-4480	0	0	0	0	0	0	0	0	0	0	0	0	0	0	0	0	0	0	0	0	0	0	0	0	0	0	0	0	0	0	0	0	0	0	0	0	0	0	0	0	0	0	0	0	0	0	0	0	0
hsa-miR-4481	0	0	0	0	0	0	0	0	0	0	0	0	0	0	0	0	0	0	0	0	0	0	0	0	0	0	0	0	0	0	0	0	0	0	0	0	0	0	0	0	0	0	0	0	0	0	0	0	0
hsa-miR-4482-3p	0	0	0	0	0	0	0	0	0.800417	1.6992	2.30438	0.456466	0	0	0	0	0.551385	0	0	0	0	0	0	0	2.2934	2.39193	2.41824	1.45673	1.75286	2.28433	2.28499	2.36179	3.09532	2.6231	0	1.32651	0	0	0	0	0	0	0	0	2.65253	0.8487	2.47235	3.1002	1.64551
hsa-miR-4482-5p	0	0	0	0	0	0	0	0	0	0	0	0	0	0	0	0	0	0	0	0	0	0	0	0	0	0	0	0	0	0	0	0	0	0	0	0	0	0	0	0	0	0	0	0	0	0	0	0	0
hsa-miR-4483	0	0	0	0	0	0	0	0	0	0	0	0	0	0	0	0	0	0	0	0	0	0	0	0	0	0	0	0	0	0	0	0	0	0	0	0	0	0	0	0	0	0	0	0	0	0	0	0	0
hsa-miR-4484	0	0	0	0	0	10.919	0	0	2.36487	0	0	0	0	0	0	0	0	0	0	0	0	0	0	0	0	0	0	0	0	0	0	0	0	0	0	0	120.868	0	0	0	0	0	0	0	0	0	0	0	0
hsa-miR-4485-3p	2.81803	0.462261	0.3059	0.248983	0.183734	6.70396	14.9918	13.1882	0	0	0	0.912931	0.322456	0.330237	0	0	0	3.82363	2.03618	10.706	11.2364	5.40702	1.55578	1.2379	0	0	0	0	0	0	0	0	0	0	71.9818	32.8311	32.0372	68.1475	24.9616	12.126	41.8873	11.6143	0	0	0	0	0	0	0
hsa-miR-4485-5p	0	0	0	0	0	0.642296	0	0	0.254678	0	0	0	0	0	0	0	0	0	0	1.57441	0	0.772431	0	0	0	0	0	0	0	0	0	0	0	0	0	0	0	0	0	2.07874	0	0	0	0	0	0	0	0	0
hsa-miR-4486	0	0	0	0	0	0	0	0	0	0	0	0	0	0	0	0	0	0	0	0	0	0	0	0	0	0	0	0	0	0	0	0	0	0	0	0	0	0	0	0	0	0	0	0	0	0	0	0	0
hsa-miR-4487	0	0	0	0	0	1.04373	0	0	0	0	0	0	0	0	0	0	0	0	0	0	0	0	0	0	0	0	0	0	0	0	0	0	0	0	0	0	0	0	0	0	0	0	0	0	0	0	0	0	0
hsa-miR-4488	1.30063	2.90564	3.48726	3.61026	1.59236	3.33191	0	0	16.8451	0	0	0	0	0	0	0	0	78.7668	31.3572	49.1215	88.1625	67.5877	159.623	13.617	0	0	0	0	0	0	0	0	0	0	15.6482	0	0	0	0	0	0	0	0	0	0	0	0	0	0
hsa-miR-4489	0	0	0.3059	0	0	0	0	0	0	0	0	0	0	0	0	0	0	0	0	0	0	0	0	0	0	0	0	0	0	0	0	0	0	0	0	0	0	0	0	0	0	0	0	0	0	0	0	0	0
hsa-miR-4490	0	0	0	0	0	0	0	0	0	0	0	0	0	0	0	0	0	0	0	0	0	0	0	0	0	0	0	0	0	0	0	0	0	0	0	0	0	0	0	0	0	0	0	0	0	0	0	0	0
hsa-miR-4491	0	0	0	0	0	0.602152	0	0	0	0	0	0	0	0	0	0	0	0	0	0	0	0	0	0	0	0	0	0	0	0	0	0	0	0	0	0	0	0	0	0	0	0	0	0	0	0	0	0	0
hsa-miR-4492	0	3.76412	3.91552	4.85518	2.44978	19.5499	0	0	17.973	0	0	0	0	0	0	0	0	66.5312	24.0269	11.9655	66.5541	55.615	14.6243	0	0	0	0	0	0	0	0	0	0	0	45.0669	3.64789	4.36871	0	1.6641	0	0	0	0	0	0	0	0	0	0
hsa-miR-4493	0	0	0	0	0	0	0	0	0	0	0	0	0	0	0	0	0	0	0	0	0	0	0	0	0	0	0	0	0	0	0	0	0	0	0	0	0	0	0	0	0	0	0	0	0	0	0	0	0
hsa-miR-4494	0	0	0	0	0	0	0	0	0	0	0	0	0	0	0	0	0	0	0	0	0	0	0	0	0	0	0	0	0	0	0	0	0	0	0	0	0	0	0	0	0	0	0	0	0	0	0	0	0
hsa-miR-4495	0	0	0	0	0	0	0	0	0	0	0	0	0	0	0	0	0	0	0	0	0	0	0	0	0	0	0	0	0	0	0	0	0	0	0	0	0	0	0	0	0	0	0	0	0	0	0	0	0
hsa-miR-4496	0	0	0	0	0	0	0	0	0	0	0	0	0	0	0	0	0	0	0	0	0	0	0	0	0	0	0	0	0	0	0	0	0	0	0	0	0	0	0	0	0	0	0	0	0	0	0	0	0
hsa-miR-4497	0	0.792447	0	0.622459	0	2.52904	0	0	1.01871	0	0	0	0	0	0	0	0	0	0	0	7.77905	6.17945	4.35618	2.47581	0	0	0	0	0	0	0	0	0	0	0	0	0	0	0	0	0	0	0	0	0	0	0	0	0
hsa-miR-4498	0	0	0	0	0	0	0	0	0.436591	0	0	0	0	0	0	0	0	0	0	0	0	0	0	0	0	0	0	0	0	0	0	0	0	0	0	0	0	0	0	0	0	0	0	0	0	0	0	0	0
hsa-miR-4499	0	0	0	0	0	0	0	0	0	0	0	0	0	0	0	0	0	0	0	0	0	0	0	0	0	0	0	0	0	0	0	0	0	0	0	0	0	0	0	0	0	0	0	0	0	0	0	0	0
hsa-miR-449a	0	0.528298	0.24472	0.311229	0.367468	0.642296	0	0	24.4491	0	0.384063	0	0	0	0	0	0	10.7062	13.0315	14.4845	7.77905	12.7451	4.04503	4.95162	0	0	0	0	0	0	0	0	0	0	3.75557	1.98976	2.91248	0	4.43761	3.46457	3.57574	2.32286	0	0	0	0	0	0	0
hsa-miR-449b-3p	0	0	0	0	0	0	0	0	0.254678	0	0	0	0	0	0	0	0	0	0	0	0	0	0	0	0	0	0	0	0	0	0	0	0	0	0	0	0	0	0	0	0	0	0	0	0	0	0	0	0
hsa-miR-449b-5p	0	0	0	0	0	0	0	0	0	0	0	0	0	0	0	0	0	0	0	0	0	0	0	0	0	0	0	0	0	0	0	0	0	0	0	0	0	0	0	0	0	0	0	0	0	0	0	0	0
hsa-miR-449c-3p	0	0	0	0	0	0	0	0	0	0	0	0	0	0	0	0	0	0	0	0	0	0	0	0	0	0	0	0	0	0	0	0	0	0	0	0	0	0	0	0	0	0	0	0	0	0	0	0	0
hsa-miR-449c-5p	0	0.990559	0.85652	0.435721	0.918669	1.12402	0	0	12.1518	0	0	0	0	0	0	0	0	0	1.22171	1.88929	0	0	0	0	0	0.227803	0	0	0	0	0	0	0	0	0	5.96928	6.55307	4.15533	4.43761	2.4252	3.06492	7.63224	0	0	0.49121	0.5658	0.824118	0.344467	0
hsa-miR-4500	0	0	0	0	0	0	0	0	0	0	0	0	0	0	0	0	0	0	0	0	0	0	0	0	0	0	0	0	0	0	0	0	0	0	0	0	0	0	0	0	0	0	0	0	0	0	0	0	0
hsa-miR-4501	0	0	0	0	0	0	0	0	0	0	0	0	0	0	0	0	0	0	0	0.629763	0	0	0	0	0	0	0	0	0	0	0	0	0	0	0	0	0	0	0	0	0	0	0	0	0	0	0	0	0
hsa-miR-4502	0	0	0	0	0	0	0	0	0	0	0	0	0	0	0	0	0	0	0	0	0	0	0	0	0	0	0	0	0	0	0	0	0	0	0	0	0	0	0	0	0	0	0	0	0	0	0	0	0
hsa-miR-4503	0	0	0.42826	0.311229	0.244978	0	0	0	0	0	0	0	0	0	0	0	0	0	0	0	0	0	0	0	0	0	0	0	0	0	0	0	0	0	0	0	0	0	0	0	0	0	0	0	0	0	0	0	0
hsa-miR-4504	0	0	0.24472	0.124492	0.244978	0.722582	0	0	0.945947	0	0	0	0	0	0	0	0	0	0	0	0	0	0	0	0	0	0	0	0	0	0	0.295224	0	0	0	0	0	0	0	0	0	0	0	0	0	0	0	0	0
hsa-miR-4505	0	0	0	0	0	0	0	0	0	0	0	0	0	0	0	0	0	0	0	0	0	0	0	0	0	0	0	0	0	0	0	0	0	0	0	0	0	0	0	0	0	0	0	0	0	0	0	0	0
hsa-miR-4506	0	0.858485	0.48944	0.186738	0.551201	0	0	0	0	0	0	0	0	0	0	0	0	0	0	0	0	0	0	0	0	0	0	0	0	0	0	0	0	0	0	0	0	0	0	0	0	0	0	0	0	0	0	0	0
hsa-miR-4507	0	0	0	0	0	0	0	0	0	0	0	0	0	0	0	0	0	0	0	0	0	0	0	0	0	0	0	0	0	0	0	0	0	0	0	0	0	0	0	0	0	0	0	0	0	0	0	0	0
hsa-miR-4508	0	13.1414	13.2149	15.2502	5.69575	6.06166	0	0	6.40333	3.58721	1.92032	0.456466	0	0	0.714938	0	0	334.95	118.506	23.3012	299.061	219.37	3.73387	5.1992	0.68802	0.341704	0	0	0	0.351436	0	0	0	0.728639	2.50372	0.663254	0	7.4796	0	2.07874	1.53246	0	1.16678	0.233735	4.81386	0.8487	0.824118	1.0334	0.719913
hsa-miR-4509	0	0	0	0	0	0	0	0	0	0	0	0	0	0	0	0	0	0	0	0	0	0	0	0	0	0	0	0	0	0	0	0	0	0	0	0	0	0	0	0	0	0	0	0	0	0	0	0	0
hsa-miR-450a-1-3p	0	0.198112	0	0.186738	0.183734	0	0	0	0.327443	0	0	0	0	0	0	0	0	0	0	1.88929	0	0	4.66734	0	0	0	0	0	0	0	0	0	0	0	0	0	0	0	0	0	0	0	0	0	0	0	0	0	0
hsa-miR-450a-2-3p	1.30063	3.16979	3.3649	3.67251	3.18472	0.240861	0	0	0	0.377601	0.384063	1.14116	0	0	0.57195	0	0	0	0	0.944644	2.59302	3.47594	0	1.98065	0	0	0	0	0	0	0	0	0	0	0	0.99488	0	0	2.49616	0	3.57574	0.99551	0	0	0	0	0	0	0
hsa-miR-450a-5p	20.3765	3.76412	3.85434	5.10416	3.36845	5.13836	20.1319	28.4054	49.0801	6.79682	3.26454	3.65172	3.06334	1.43103	4.43262	1.49578	1.37846	117.768	87.1485	67.3846	45.8099	93.4642	10.2681	7.17985	0	0.341704	0	0.17138	0	0	0.175768	0	0	0	100.775	84.8965	40.0465	103.883	148.383	83.1496	129.238	97.5599	0	0	0.392968	0	0	0	0
hsa-miR-450b-3p	0	0	0	0	0	0	0	0	0.14553	0	0	0	0	0	0	0	0	0	0	0	0	0	0	0	0	0	0	0	0	0	0	0	0	0	0	0	0	0	0	0	0	0	0	0	0	0	0	0	0
hsa-miR-450b-5p	9.32117	2.44338	1.95776	2.9878	2.44978	4.65664	60.8239	64.9267	17.9002	0.566401	0.576095	0	0.483685	0.550394	0.428963	0	0	13.7651	6.51577	5.0381	2.59302	5.0208	27.3817	25.2533	0	0	0	0	0	0	0	0	0	0	127.064	112.421	65.5307	116.349	228.537	95.622	132.813	167.909	0	0	0	0	0	0	0
hsa-miR-4510	0	0	0	0	0	0	0	0	0	0	0	0	0	0	0	0	0	0	0	0	0	0	556.347	572.16	0	0	0	0	0	0	0	0	0	0	0	0	0	0	0	0	0	0	0	0	0	0	0	0	0
hsa-miR-4511	0	0	0.24472	0	0	0.321148	0	0	0	1.3216	1.92032	2.28233	2.57965	0	2.2878	0	2.89477	0	0	0	0	0	0	0	1.03203	1.48072	1.88085	0.856898	0.618657	1.14217	1.05461	0	1.14038	0	0	0	0	0	1.1094	4.85039	0	1.32735	0	0	0	0	0	0	0
hsa-miR-4512	0	0	0	0	0	0	0	1.52172	0	0	0	0	0.322456	0	0	0	0	0	0	0	0	0	0	0	0	0	0.268693	0	0	0.263577	0.263652	0	0.488734	0	0	0	0	0	0	0	0	0	0	0	0	0	0	0.459289	0.822757
hsa-miR-4513	0	0	0	0	0	1.2043	0	0	0	0	0	0	0	0	0	0	0	0	0	0	0	0	0	0	0	0	0	0	0	0	0	0	0	0	0	0	0	0	0	0	0	0	0	0	0	0	0	0	0
hsa-miR-4514	0	0	0	0	0	0	0	0	0	0	0	0	0	0	0	0	0	0	0	0	0	0	0	0	0	0	0	0	0	0	0	0	0	0	0	0	0	0	0	0	0	0	0	0	0	0	0	0	0
hsa-miR-4515	0	0	0	0.311229	0	0	0	0	0	0	0	0	0	0	0	0	0	0	0	0	0	0	0	0	0	0	0	0	0	0	0	0	0	0	0	0	0	0	0	0	0	0	0	0	0	0	0	0	0
hsa-miR-4516	0.650314	5.48109	3.6708	2.67657	1.46987	3.65306	0	0	1.23701	0	0	0	0	0	0	0	0	31.3538	9.77366	4.72322	30.2519	23.5591	2.8004	0	0	0	0	0	0	0	0	0	0	0	5.63336	1.98976	5.09683	4.9864	0.832052	4.15748	0	1.99102	0	0	0	0	0	0	0
hsa-miR-4517	0	0	0	0	0	0	0	0	0.764034	0	0	0	0	0	0	0	0	0	0	0	0	0	0	0	0	0	0	0	0	0	0	0	0	0	0	0	0	0	0	0	0	0	0	0	0	0	0	0	0
hsa-miR-4518	0	0	0	0	0	0.722582	0	0	0	0	0	0	0	0	0	0	0	0	0	0	0	0	0	0	0	0	0	0	0	0	0	0	0	0	0	0	0	0	0	0	0	0	0	0	0	0	0	0	0
hsa-miR-4519	0	0	0	0	0	1.04373	0	0	0	0	0	0	0	0	0	0	0	0	0	0.944644	0	0	0	0	0	0	0	0	0	0	0	0	0	0	0	0	0	0	0	0	0	0	0	0	0	0	0	0	0
hsa-miR-451a	3911.86	7345.39	13261.9	12557.5	13353.7	1479.77	1206.2	1207.74	34706.8	285485	267709	227650	342174	127938	318722	122761	129877	4798.66	10137.3	3342.78	8313.21	7581.41	2797.29	3288.12	14661.5	15801.4	15657.7	6845.93	8900.51	11995.5	12176.9	11176.4	10973.2	10773.4	12755.2	35034	29164.1	37056.4	12404.2	42279.8	36334.6	21893.2	345.815	135.216	8204.39	4105.16	6370.23	3478.77	454.162
hsa-miR-451b	3.90189	1.45282	3.18136	2.24085	3.00099	1.08387	0	0	9.42309	73.4434	57.4174	52.4935	80.7753	39.1881	83.2188	39.8873	34.4616	0	8.14472	0	0	5.79323	0	0	6.07751	0	6.58298	0	0	4.9201	4.74574	4.13313	0	0	6.88522	14.26	13.1061	8.31067	6.37906	14.2047	12.2597	7.63224	0	0	0	0	0	0	0
hsa-miR-4520-2-3p	0	0	0	0	0	0	0	0	0	0	0	0	0	0	0	0	0	0	0	0	0	0	0	0	0	0	0	0	0	0	0	0	0	0	0	0	0	0	0.554701	0	0	1.65918	0	0	0	0	0	0	0
hsa-miR-4520-3p	0	0.264149	0	0	0	0	0	0	0	0	0	0	0	0	0	0	0	0	0	0	0	0	8.40121	0.742743	0	0	0	0	0	0	0	0	0	0	1.87779	0.99488	0	0	1.94145	3.46457	4.59738	4.64571	0	0	0	0	0	0	0
hsa-miR-4520-5p	0	0	0	0	0	0	0	0	0	0	0	0	0	0	0	0	0	0	0	0	0	0	2.17809	0	0	0	0	0	0	0	0	0	0	0	0	0	0	0	0	0	0	0	0	0	0	0	0	0	0
hsa-miR-4521	8.88763	3.03771	2.1413	0.871442	1.53112	0.843013	0	0	0.945947	1.5104	3.45657	2.51056	2.90211	1.5411	1.85884	1.99437	1.92985	0	3.66512	2.20417	0	4.24837	63.1646	38.1275	0	0	0	0	0	0	0	0	0	0	0	4.64277	0	3.32427	3.60556	5.5433	4.08656	0	0	0	0	0	0	0	0
hsa-miR-4522	0	0	0	0	0	0	0	0	0.472973	0	0	0	0	0	0	0	0	0	0	0	0	0	0	0	0	0	0	0	0	0	0	0	0	0	0	0	0	0	0	0	0	0	0	0	0	0	0	0	0
hsa-miR-4523	0	0	0	0	0	0	0	0	0	0	0	0	0	0	0	0	0	0	0	0	0	0	0	0	0	0	0	0	0	0	0	0	0	0	0	0	0	0	0	0	0	0	0	0	0	0	0	0	0
hsa-miR-452-3p	0	0	0	0	0	0	0	0	0	0	0	0	0	0	0	0	0	0	0	0	0	0	0	2.47581	0	0	0	0	0	0	0	0	0	0	0	0	0	0	0	0	0	0	0	0	0	0	0	0	0
hsa-miR-4524a-3p	0	0.462261	0.73416	0.560213	0.551201	0	2.99836	0	1.30977	0	0	0	0	0	0	0	0	0	0	0	0	0	2.8004	11.3887	0	0	0	0	0	0	0	0	0	0	0	0	0	4.9864	0.554701	0	2.04328	0	0	0	0	0	0	0	0
hsa-miR-4524a-5p	0	0.264149	0.24472	0.497967	0.122489	0.481722	0	0	0	0	0	0	0	0	0	0	0	4.58836	0	1.25953	0	0.772431	0	1.73307	0	0	0	0	0	0	0	0	0	0	0	0	0	0	0	3.11811	0	0	0	0	0	0	0	0	0
hsa-miR-4524b-3p	0	0	0	0	0	0	0	0	0	0	0	0	0	0	0	0	0	0	0	0	0	0	0	0	0	0	0	0	0	0	0	0	0	0	0	0	0	0	0	0	0	0	0	0	0	0	0	0	0
hsa-miR-4524b-5p	0	0	0	0	0	0	0	0	0	0	0	0	0	0	0	0	0	0	0	0	0	0	0	0	0	0	0	0	0	0	0	0	0	0	0	0	0	0	0	0	0	0	0	0	0	0	0	0	0
hsa-miR-4525	0	0.330186	0.36708	0.435721	0.489957	0	0	0	0	0	0	0	0	0	0	0	0	0	0	0	0	0	0	0	0	0	0	0	0	0	0	0	0	0	0	0	0	0	0	0	0	0	0	0	0	0	0	0.344467	0
hsa-miR-452-5p	6.28637	58.3109	45.5179	60.1917	52.2416	23.1628	7.28173	9.13032	708.732	0	0	0	0.644913	0	0	0	0	170.534	191.401	222.936	113.228	208.556	195.717	295.116	0	0	0	0	0	0	0	0	0	0	38.8076	48.4175	42.959	70.6407	68.5056	52.3149	53.6361	55.4167	0	0	0	0	0	0	0
hsa-miR-4526	0	0	0	0	0	1.12402	0	0	0	0	0	0	0	0	0	0	0	0	0	0	0	0	0	0	0	0	0	0	0	0	0	0	0	0	0	0	0	0	0	0	0	0	0	0	0	0	0	0	0
hsa-miR-4527	0	0	0	0	0	0	0	0	0	0	0	0	0	0	0	0	0	0	0	0	0	0	0	0	0	0	0	0	0	0	0	0	0	0	0	0	0	0	0	0	0	0	0	0	0	0	0	0	0
hsa-miR-4528	0	0	0	0	0	0	0	0	0.254678	0	0	0	0	0	0	0	0	0	0	0	0	0	0	0	0	0	0	0	0	0	0	0	0	0	0	0	0	0	0	0	0	0	0	0	0	0	0	0	0
hsa-miR-4529-3p	0	0.396224	0.73416	0.373475	0.551201	0.642296	0	0	0.327443	0	0	0	0	0	0	0	0	0	0	0	0	0	0	0	0	0	0	0	0	0	0	0	0	0	0	0	0	0	0	0	0	0	0	0	0	0	0	0	0
hsa-miR-4529-5p	0	0	0.79534	0.684704	0.673691	0	0	0	1.20062	0	0	0	0	0	0	0	0	0	0	0	0	0	0	0	0	0	0	0	0	0	0	0	0	0	0	2.32139	0	6.64853	1.6641	0	0	0	0	0	0	0	0	0	0
hsa-miR-4530	0	0	0	0	0	0	0	0	0	0	0	0	0	0	0	0	0	0	0	0	0	0	0	0	0	0	0	0	0	0	0	0	0	0	0	0	0	0	0	0	0	0	0	0	0	0	0	0	0
hsa-miR-4531	0	0	0	0	0	0	0	0	0	0	0	0	0	0	0	0	0	0	0	0	0	0	0	0	0	0	0	0	0	0	0	0	0	0	0	0	0	0	0	0	0	0	0	0	0	0	0	0	0
hsa-miR-4532	0	9.64144	8.01458	9.27463	6.49193	133.798	0	0	350.764	0	0	0	0	0	0	0	0	862.612	362.847	204.043	871.253	722.995	1177.1	143.597	0	0	0	0	0	0	0	0	0	0	43.1891	30.178	53.8808	55.6815	19.1372	25.2913	32.1817	29.8653	0	0	0	0	0	0	0
hsa-miR-4533	0	0	0	0	0	0	0	0	0	0	0	0	0	0	0	0	0	0	0	0	0	0	0	0	0	0	0	0	0	0	0	0	0	0	0	0	0	0	0	0	0	0	0	0	0	0	0	0	0
hsa-miR-4534	0	0	0	0	0	0	0	0	0	0	0	0	0	0	0	0	0	0	0	0	0	0	0	0	0	0	0	0	0	0	0	0	0	0	0	0	0	0	0	0	0	0	0	0	0	0	0	0	0
hsa-miR-4535	0	0	0	0	0	0	0	0	0	0	0	0	0	0	0	0	0	0	0	0	0	0	0	0	0	0	0	0	0	0	0	0	0	0	0	0	0	0	0	0	0	0	0	0	0	0	0	0	0
hsa-miR-4536-3p	0	0.792447	0.97888	0.74695	0.489957	0	0.856675	0	1.38254	0	0	0	0	0	0	0	0	3.82363	0	2.20417	2.59302	2.31729	0	0	0	0	0	0	0	0	0	0	0	0	0	1.32651	0	0	0.832052	1.38583	0	1.32735	0	0	0	0	0	0	0
hsa-miR-4536-5p	0	0.528298	0.42826	0.435721	0.489957	0	0	0	0.509356	0	0	0	0	0	0	0	0	4.58836	4.07236	0.944644	2.59302	0	0	0	0	0	0	0	0	0	0	0	0	0	0	0	0	0	0	0	0	0	0	0	0	0	0	0	0
hsa-miR-4537	0	0	0	0	0	0	0	0	0	0	0	0	0	0	0	0	0	0	0	0	0	0	0	0	0	0	0	0	0	0	0	0	0	0	0	0	0	0	0	0	0	0	0	0	0	0	0	0	0
hsa-miR-4538	0	0	0	0	0	0	0	0	0	0	0	0	0	0	0	0	0	0	0	0	0	0	0	0	0	0	0	0	0	0	0	0	0	0	0	0	0	0	0	0	0	0	0	0	0	0	0	0	0
hsa-miR-4539	0	0	0	0	0	0	0	0	0	0	0	0	0	0	0	0	0	0	0	0	0	0	0	0	0	0	0	0	0	0	0	0	0	0	0	0	0	0	0	0	0	0	0	0	0	0	0	0	0
hsa-miR-4540	0	0	0	0	0	0	0	0	0	0	0	0	0	0	0	0	0	0	0	0	0	0	0	0	0	0	0	0	0	0	0	0	0	0	0	0	0	0	0	0	0	0	0	0	0	0	0	0	0
hsa-miR-454-3p	9.1044	0.330186	0.79534	0.809196	0.918669	70.5321	27.8419	25.362	81.4606	78.7298	41.6709	60.9381	49.8195	16.6219	32.6012	6.98028	13.0954	448.13	542.845	614.019	460.692	485.859	66.2762	24.5105	10.6643	9.79551	10.076	7.19794	10.4141	8.7859	9.05207	6.79015	7.33102	9.32658	172.131	180.073	222.076	146.268	284.007	195.401	192.068	206.734	0.807769	0.350603	12.9679	4.2435	7.82912	3.78914	3.59956
hsa-miR-454-5p	0.433543	0.924522	0.55062	1.18267	0.734935	4.8975	0	0	0.691269	19.6352	21.6996	17.5739	27.2476	15.9614	24.0219	23.9324	30.0505	4.58836	2.03618	1.25953	0	2.70351	0	3.46613	18.0032	19.0215	21.4955	13.2819	15.8789	17.6597	17.5768	17.4182	13.0329	17.7788	6.25929	3.97952	7.28119	9.14173	9.42992	7.9685	8.17312	6.30489	0	0	0.687694	0	0	0	0
hsa-miR-455-3p	13.4398	17.698	18.7823	35.4801	19.5983	18.747	125.931	106.52	188.498	0	0	0	0	0	0	0	0	223.3	291.581	465.08	288.689	359.567	79.6559	146.32	0	0	0	0	0	0	0	0	0	0	30.6705	31.5045	50.2402	35.7359	29.3992	25.9842	18.9003	28.2061	0	0	0	0	0	0	0
hsa-miR-455-5p	34.9002	5.48109	6.36272	5.9756	5.14455	32.4761	101.944	96.8829	81.1331	0	0	0	0	0	0	0	0	1043.85	1243.29	1547.33	825.443	1164.05	42.6283	114.878	0	0	0	0	0	0	0	0	0	0	98.8968	98.8248	109.218	102.221	94.8539	106.709	67.4283	88.2685	0	0	0	0	0	0	0
hsa-miR-4632-3p	0	0	0	0	0	0	0	1.01448	0	0	0	0	0	0	0	0	0	0	0	0	0	0	1.24462	0	0	0	0	0	0	0	0	0	0	0	0	0	0	0	0	0	0	0	0	0	0	0	0	0	0
hsa-miR-4632-5p	0	0	0	0	0	0	0	0	0	0	0	0	0	0	0	0	0	0	0	0	0	0	0	0	0	0	0	0	0	0	0	0	0	0	0	0	0	0	0	0	0	0	0	0	0	0	0	0	0
hsa-miR-4633-3p	0	0	0	0	0	0	0	0	0	0	0	0	0	0	0	0	0	0	0	0	0	0	0	0	0	0	0	0	0	0	0	0	0	0	0	0	0	0	0	0	0	0	0	0	0	0	0	0	0
hsa-miR-4633-5p	0	0	0	0	0	0	0	0	0	0	0	0	0	0	0	0	0	0	0	0	0	0	0	0	0	0	0	0	0	0	0	0	0	0	0	0	0	0	0	0	0	0	0	0	0	0	0	0	0
hsa-miR-4634	0	0	0	1.36941	0	0	0	0	37.947	0	0	0	0	0	0	0	0	0	0	28.6542	0	33.6007	0	0	0	0	0	0	0	0	0	0	0	0	0	0	0	0	0	0	0	0	0	0	0	0	0	0	0
hsa-miR-4635	0	0.132075	0	0	0	0	0	0	0.400208	0	0	0.684698	1.1286	0	0.428963	1.49578	0.964924	0	0	0	0	0	0	0	0.45868	0	0	0	0	0	0	0	0	0	0	0	0	0	0	0	0	0	0	0	0	0	0	0	0
hsa-miR-4636	0	0	0	0	0	0.762726	0	0	1.52807	0	0	0	0	0	0	0	0	8.41199	7.73748	7.87203	11.2364	7.33809	3.73387	1.73307	0	0	0	0	0	0	0	0	0	0	0	0	5.09683	0	0	2.77165	0	1.32735	0	0	0	0	0	0	0
hsa-miR-4637	0	0.132075	0.12236	0	0.122489	0	0	0	0.254678	0	0	0	0	0	0	0	0	0	0	0	0	0	0	0	0	0	0	0	0	0	0	0	0	0	0	0	0	0	0	0	0	0	0	0	0	0	0	0	0
hsa-miR-4638-3p	0	0.792447	0.55062	0	0	6.58353	0	0	1.6736	0	0	0	0	0.660473	0.57195	0	0	0	0	0	0	0	0	0	0	0.455605	0.671733	0	0	0.263577	0.175768	0.73806	0.325823	0.437183	0	1.32651	0	0	3.60556	3.11811	0	0	0	0	0	0	0	0	0.308534
hsa-miR-4638-5p	0	0	0.18354	0.248983	0	0	0	0	0	0	0	0	0	0	0	0	0	0	0	0	0	0	0	0	0	0	0	0	0	0	0	0	0	0	0	0	0	0	0	0	0	0	0	0	0	0	0	0	0
hsa-miR-4639-3p	0	0	0	0	0	0	0	0	0	0	0	0	0	0	0	0	0	0	0	0	0	0	0	0	0	0	0	0	0	0	0.175768	0	0	0	0	0	0	0	0	3.11811	0	0	0	0	0	0	0	0	0
hsa-miR-4639-5p	0	0.198112	0	0	0	0	0	0	0	0	0	0	0	0	0	0	0	0	1.22171	0	0	0	0.933467	0	0	0	0	0	0	0	0	0	0	0	0	0	0	0	0	0	0	0	0	0	0	0	0	0	0
hsa-miR-4640-3p	0	0	0	0	0	0.843013	0	0	0	0	0	0	0	0	0	0	0	0	0	0	0	0	0	0	0	0	0	0	0	0	0	0	0	0	0	0.99488	0	0	0	2.4252	3.57574	0	0	0	0	0	0	0	0
hsa-miR-4640-5p	0	0	0	0	0	0	0	0	0	0	0	0	0	0	0	0	0	0	0	0	0	0	0	0	0	0	0	0	0	0	0	0	0	0	0	0	0	0	0	0	0	0	0	0	0	0	0	0	0
hsa-miR-4641	0	0	0	0.311229	0	0.361291	0	0	0	0	0	0	0	0	0	0	0	0	0	0	0	0	0	0	0	0	0	0	0	0	0	0	0	0	0	0	0	0	0.832052	0	0	0	0	0	0	0	0	0	0
hsa-miR-4642	0	0	0	0.124492	0	1.52545	0	0	0	0.377601	0	0	0	0	0	0	0	0	0	0	0	0	0	0	0.22934	0.227803	0.268693	0	0	0	0	0	0	0.291456	0	0	0	0	0	0	0	0	0	0	0.785936	0	0.412059	0.344467	0.514223
hsa-miR-4643	0	0	0	0	0	0	0	0	0	0	0	0	0	0	0	0	0	0	0	0	0	0	0	0	0	0	0	0	0	0	0	0	0	0	0	0	0	0	0	0	0	0	0	0	0	0	0	0	0
hsa-miR-4644	0	0	0	0	0	0	0	0	0	0	0	0	0	0	0	0	0	0	0	0	0	0	0	0	0	0	0	0	0	0	0	0	0	0	0	0	0	0	0	0	0	0	0	0	0	0	0	0	0
hsa-miR-4645-3p	0	0	0	0	0.244978	1.16416	0	3.55068	1.01871	0	0	0	0	0.330237	0	0	0.275692	0	0	1.88929	0	3.08972	0	1.2379	0	0	0	0	0.206219	0	0	0	0	0	5.63336	2.98464	6.55307	5.81747	2.77351	7.27559	0	3.6502	0.269256	0	0.196484	0	0	0	0
hsa-miR-4645-5p	0	0	0	0	0	0	0	0	0	0	0	0	0	0	0	0	0	0	0	0	0	0	0	0	0	0	0	0	0	0	0	0	0	0	0	0	0	0	0	0	0	0	0	0	0	0	0	0	0
hsa-miR-4646-3p	1.73417	0	0	0	0	0	1.28501	0	0	11.1392	9.40955	14.8351	6.12667	0	13.8698	13.9606	9.78708	0	0	0	0	0	0	0	1.83472	0	1.07477	0	2.06219	2.10862	1.31826	2.21418	2.44367	0	0	0	0	0	1.38675	0	0	0	0	0	1.37539	0	0	0	2.26258
hsa-miR-4646-5p	0	0.264149	0.67298	0.435721	0.612446	0	0	0	0	0	0	0	0	0	0	0	0	0	0	0	0	0	0	13.3694	0	0	0	0	0	0	0	0	0	0	0	0	0	0	0	0	0	0	0.269256	0	0	0.5658	0.412059	0.459289	1.13129
hsa-miR-4647	0	0.660373	0.6118	0.560213	0.244978	0	0	0	0	0	0	0	0	0	0	0	0	0	0	0	0	0	0	0	0	0	0	0	0	0	0	0	0	0	0	0	0	0	0	0	0	0	0	0	0	0	0	0	0
hsa-miR-4648	0	0	0	0	0	0	0	0	0	0	0	0	0	0	0	0	0	0	0	0	0	0	0	0	0	0	0	0	0	0	0	0	0	0	0	0	0	0	0	0	0	0	0	0	0	0	0	0	0
hsa-miR-4649-3p	0	0	0	0	0	0	0	0	0	0	0	0	0	0	0	0	0	0	0	0	0	0	1.55578	0	0	0	0	0	0	0	0	0	0	0	0	0	7.28119	0	0	3.46457	0	0	0	0	0	0	0	0	0
hsa-miR-4649-5p	0	0	0.3059	0	0	0	0	0	0	0	0	0	0	0	0	0	0	0	0	0	0	0	0	2.97097	0	0	0	0	0	0	0	0	0	0	0	0	0	0	0	0	0	0	0	0	0	0	0	0	0
hsa-miR-4650-3p	0	0.198112	0	0	0.244978	0	0	0	0	0	0	0	0	0	0	0	0	0	0	0	0	0	0	0	0	0	0	0	0	0	0	0	0	0	0	0	0	0	0	0	0	0	0	0	0	0	0	0	0
hsa-miR-4650-5p	0	0	0	0	0	0	0	0	0	0	0	0	0	0	0	0	0	0	0	0	0	0	0	0	0	0	0	0	0	0	0	0	0	0	0	0	0	0	0	0	0	0	0	0	0	0	0	0	0
hsa-miR-4651	0	0	0	0.74695	0	0	0	0	0	0	0	0	0	0	0	0	0	0	0	0	0	0	0	0	0	0	0	0	0	0	0	0	0	0	0	0	0	0	0	0	0	0	0	0	0	0	0	0	0
hsa-miR-4652-3p	0	0	0	0	0	0	0	0	0	0	0	0	0	0	0	0	0	0	0	0	0	0	0	0	0	0	0	0	0	0	0	0	0	0	0	0	0	0	0	0	0	0	0	0	0	0	0	0	0
hsa-miR-4652-5p	0	0	0	0	0	0	0	0	0	0	0	0	0	0	0	0	0	0	0	0	0	0	0	0	0	0	0	0	0	0	0	0	0	0	0	0	0	0	0	0	0	0	0	0	0	0	0	0	0
hsa-miR-4653-3p	0	0	0	0	0	0	0	0	0	0	0	0	0	0	0	0	0	0	0	0	0	0	0	0	0	0	0	0	0	0	0	0	0	0	0	0	0	0	0	0	0	0	0	0	0	0	0	0	0
hsa-miR-4653-5p	0	0	0	0	0	0	0	0	0	0	0	0	0	0	0	0	0	0	0	0	0	0	0	0	0	0	0	0	0	0	0	0	0	0	0	0	0	0	0	0	0	0	0	0	0	0	0	0	0
hsa-miR-4654	0	0.924522	0	0	0	0.441578	0	0	0	0	0	0	0	0	0	0	0	0	0	0	0	0	0	1.98065	0	0	0	0	0	0	0	0	0	0	0	0	0	0	0	0	0	0	0	0	0	0	0	0	0
hsa-miR-4655-3p	0	0	0	0	0	0	0	0	0	0	0	0	0	0	0	0	0	0	0	0	0	0	0	0	0	0	0	0	0	0	0	0	0	0	0	0	0	0	0	0	0	0	0	0	0	0	0	0	0
hsa-miR-4655-5p	0	0	0	0	0	0	0	0	0	0	0	0	0	0	0	0	0	0	0	0	0	0	0	0	0	0	0	0	0	0	0	0	0	0	0	0	0	0	0	0	0	0	0	0	0	0	0	0	0
hsa-miR-4656	0	0	0	0	0	0	0	0	0	0	0	0	0	0	0	0	0	0	0	0	0	0	0	0	0	0	0	0	0	0	0	0	0	0	0	0	0	0	0	0	0	0	0	0	0	0	0	0	0
hsa-miR-4657	0	0.462261	0.24472	0.560213	0.673691	0	0	0	0.800417	0	0	0	0	0	0	0	0	0	0	0	0	0	0	0	0	0	0	0	0	0	0	0	0	0	0	0	0	0	0	0	0	0	0	0	0	0	0	0	0
hsa-miR-4658	0	0	0	0	0	0.281004	0	0	0	0	0	0	0	0	0	0	0	0	0	0	0	0	0	0	0	0	0	0	0	0	0	0	0	0	0	0	0	0	0	0	0	0	0	0	0	0	0	0	0
hsa-miR-4659a-3p	0	0	0.12236	0	0	0	0	0	0.291061	5.28641	5.18485	8.90108	9.19001	8.80631	5.14755	7.47888	4.82462	0	0	1.25953	0	0	0	0	1.60538	0.797309	0.80608	0.514139	0.618657	1.40574	0.527305	0.590448	0.814557	0.874367	0	0	0	0	0	0	0	0	0	0	0.589452	0	0	0	0
hsa-miR-4659a-5p	0	0	0	0	0	0	0	0	0	0	0	0	0	0	0	0	0.551385	0	0	0	0	0	0	0	0	0	0	0	0	0	0	0	0	0	0	0	0	0	0	0	0	0	0	0	0	0	0	0	0
hsa-miR-4659b-3p	1.08386	0	0	0	0.122489	0	0	0	0	1.3216	0.576095	1.14116	2.09597	1.21087	0.428963	1.49578	1.792	0	0	0	0	0	0	0	0.80269	0.797309	0.671733	0	0.206219	0.790731	0.615189	0	0.488734	0.874367	0	0	0	0	0	0	0	0	0	0	0.589452	0	0.824118	0	0.205689
hsa-miR-4659b-5p	0	0	0	0	0	0	0	0	0	0	0	0	2.74088	1.76126	2.71676	0	2.06769	0	0	0	0	0	0	0	0	0	0	0	0	0	0.263652	0	0	0	0	0	0	0	0	0	0	0	0	0	0	0	0	0	0
hsa-miR-466	0	0	0	0	0	0	0	0	0	0	0	0	0	0	0	0	0	0	0	0	0	0	0	0	0	0	0	0	0	0	0	0	0	0	0	0	0	0	0	0	0	0	0	0	0	0	0	0	0
hsa-miR-4660	0	0.330186	0	0.186738	0	0	0	0	0	0	0	0	0	0	0	0	0	0	0	0	0	0	0	0	0	0	0	0	0	0	0	0	0	0	0	0	0	0	0	0	0	0	0	0	0	0	0	0	0
hsa-miR-4661-5p	0	0	0	0	0	2.81004	0	0	0	0.944002	0	0	0	0	0	0	0	0	0	2.20417	0	3.08972	1.55578	3.21855	0.45868	0.455605	0.40304	0	0.412438	0.439295	0	0	0.325823	0	22.5334	0	0	0	0	25.9842	0	25.2196	0	0	0	0	0	0.344467	0.308534
hsa-miR-4662a-3p	0	0	0	0	0.244978	0.361291	0	0	0	0	0	0	0	0	0	0	0	0	0	0.944644	3.45735	4.63459	0	0	0	0	0	0	0	0	0	0	0	0	0	0	0	0	0	0	0	0	0	0	0	0	0	0	0
hsa-miR-4662a-5p	5.41929	0.660373	0	0.435721	0.428712	3.01076	48.8304	47.1733	0.945947	0	0	0	0	0	0	0	0	0	2.85065	1.57441	8.64339	8.49674	5.91196	2.72339	0	0.227803	0	0.17138	0	0.351436	0	0	0	0	7.51115	3.97952	6.55307	0	2.2188	3.46457	8.17312	3.6502	0	0	0	0	0	0	0
hsa-miR-4663	0	0	0	0	0	0	0	0	0	0	0	0	0	0	0	0	0	0	0	0	0	0	0	0	0	0	0	0	0	0	0	0	0	0	0	0	0	0	0	0	0	0	0	0	0	0	0	0	0
hsa-miR-4664-3p	0	0	0	0	0	2.04732	0	0	0	0	0	0	0	0	0	0	0	0	0	0	0	0	0	0	0	0	0	0	0	0	0	0	0	0	0	0	0	0	0	0	3.06492	0	0	0	0	0	0	0	0
hsa-miR-4664-5p	0	0	0	0	0	0	0	0	2.76508	0	0	0	0	0	0	0	0	0	0	0	0	0	0	0	0	0	0	0	0	0	0	0	0	0	0	0	0	0	0	0	0	0	0	0	0	0	0	0	0
hsa-miR-4665-3p	0	0	0	0	0	0	0	0	0	0	0	0	0	0	0	0	0	0	0	0	0	0	0	0	0	0	0	0	0	0	0	0	0	0	0	0	0	0	0	0	0	0	0	0	0	0	0	0	0
hsa-miR-4665-5p	0	0	0	0	0	0	0	0	0	0	0	0	0	0	0	0	0	0	0	0	0	0	0	0	0	0	0	0	0	0	0	0	0	0	0	0	0	0	0	0	0	0	0	0	0	0	0	0	0
hsa-miR-4666a-3p	0	0	0	0	0	0	0	0	0	0	0	0	0	0	0	0	0	0	0	0	0	0	0	0	0	0	0	0	0	0	0	0	0	0	0	0	0	0	0	0	0	0	0	0	0	0	0	0	0
hsa-miR-4666a-5p	0	0	0	0	0	0	0	0	0	0	0	0	0	0	0	0	0	0	0	0	0	0	0	0	0	0	0	0	0	0	0	0	0	0	0	0	0	0	0	0	0	0	0	0	0	0	0	0	0
hsa-miR-4666b	0	0	0	0	0	0	0	0	0	0	0	0	0	0	0	0	0	0	0	0	0	0	0	0	0	0	0	0	0	0	0	0	0	0	0	0	0	0	0	0	0	0	0	0	0	0	0	0	0
hsa-miR-4667-3p	0	0	0	0	0	0	0	0	0	0	0.576095	0	0	0	0.428963	0	0	0	0	0	0	0	0	0	0	0	0	0	0	0	0	0	0	0	0	0	0	0	0	0	0	0	0	0	0	0	0	0	0
hsa-miR-4667-5p	0	1.78301	1.34596	0.933688	1.53112	0.843013	0	0	0.618504	0	0	0	0	0	0	0	0	0	0	2.20417	0	0	0.622312	0	0	0	0	0	0	0	0	0	0	0	0	0	5.09683	0	1.1094	0	0	0	0	0	0	0	0	0	0
hsa-miR-4668-3p	0	0	0.18354	0	0	0	0	0	0.654886	0	0	0	0	0	0	0	0	0	0	0	0	0	0	0	0	0	0	0	0	0	0	0	0	0	0	0	0	0	0	0	0	0	0	0	0	0	0	0	0
hsa-miR-4668-5p	0	0	0	0	0	0.481722	0	0	0	0	0.768126	0	0	0	0	0	0.413539	0	0	4.40834	0	0	0	0	0	0	0	0	0	0	0	0	0	0	0	0	0	0	0	0	0	0	0	0	0	0	0	0	0
hsa-miR-4669	0	0	0	0	0	0	0	0	0	0	0	0	0	0	0	0	0	0	0	0	0	0	0	0	0	0	0	0	0	0	0	0	0	0	0	0	0	0	0	0	0	0	0.628265	0	0	0	0	0	0
hsa-miR-4670-3p	0	0	0	0.124492	0	0.361291	1.71335	1.52172	0.109148	0.377601	0	0	0	0	0	0	0	0	0	0	0	0	0	0	0	0	0	0	0	0	0	0	0	0	0	1.65813	2.91248	0	0	0	2.04328	2.65469	0	0	0	0	0	0	0
hsa-miR-4670-5p	0	0.198112	0.12236	0	0	0	0	0	0	0	0	0	0.322456	0	0	0	0	0	0	0	0	0	0	0	0	0	0	0	0	0	0	0	0	0	0	0	0	0	0	0	0	0	0	0	0	0	0	0	0
hsa-miR-4671-3p	0	0	0	0	0	0	0	0	0	0	0	0	0	0	0	0	0	0	0	0	0	0	0	0	0	0	0	0	0	0	0	0	0	0	0	0	0	0	0	0	0	0	0	0	0	0	0	0	0
hsa-miR-4671-5p	0	0	0	0	0	0	0	0	0	0	0	0	0	0	0	0	0	0	0	0	0	0	0	0	0	0	0	0	0	0	0	0	0	0	0	0	0	0	0	0	0	0	0	0	0	0	0	0	0
hsa-miR-4672	0	0	0	0.124492	0	0	0	0	0.545739	0.944002	1.15219	0	0.967369	0	1.28689	0	0	0	0	0	0	0	0	0	0	0.341704	0.80608	0.428449	0	0.527154	0.351537	0	0.488734	0	0	0	0	0	0	0	0	0	0.179504	0	0	0	0	0	0
hsa-miR-4673	0	0	0	0	0	0	0	0	0	0	0	0	0	0	0	0	0	0	0	0	0	0	0	0	0	0	0	0	0	0	0	0	0	0	0	0	0	0	0	0	0	0	0	0	0	0	0	0	0
hsa-miR-4674	0	0.594335	0	0	0	0	0	0	0	0	0	0	0	0	0	0	0	0	0	0	0	0	0	0	0	0	0	0	0	0	0	0	0	0	0	0	0	0	0	0	0	0	0	0	0	0	0	0	0
hsa-miR-4675	0	0	0	0	0	0	0	0	0	0	0	0	0	0	0	0	0	0	0	0	0	0	0	0	0	0	0	0	0	0	0	0	0	0	0	0	0	0	0	0	0	0	0	0	0	0	0	0	0
hsa-miR-4676-3p	1.5174	0	0	0	0	0	0	0	0.472973	0	0	0	0.483685	0	0	1.49578	0.413539	0	0	0	0	0	0	0	0	0	0	0	0	0	0	0	0	0	0	0	0	0	0	0	0	0	0	0	0	0	0	0	0
hsa-miR-4676-5p	0	0	0	0	0	0	0	0	0	0	0	0	0	0.440316	0	0	0	0	0	0	0	0	0	0	0	0	0	0	0	0	0	0	0	0	0	0	0	0	0	0	0	0	0	0	0	0	0	0	0
hsa-miR-4677-3p	1.73417	0	0	0.124492	0.183734	4.77707	11.5651	12.1738	2.76508	2.26561	0.768126	1.59763	2.09597	0.550394	1.42988	0	1.37846	6.11781	6.92301	3.4637	8.64339	9.26917	0.622312	3.9613	3.32543	4.32825	4.43344	2.39931	2.37152	3.77794	3.60325	4.57597	2.60658	2.76883	18.7779	14.9232	13.8343	20.7767	14.4222	21.1338	16.3462	21.9012	0.269256	0	0.392968	0	0.824118	0.229645	0.411379
hsa-miR-4677-5p	0	0	0	0	0	0	0	0	1.27339	0	0.576095	0	0	0	0	0	0	8.41199	2.03618	1.57441	0	2.70351	0	2.72339	0	0	0	0	0	0	0	0.295224	0	0	0	0	0	0	0	0	0	0.99551	0	0	0	0	0	0	0
hsa-miR-4678	0	0.462261	0.36708	0.186738	0.122489	0	0	0	0	0	0	0	0	0	0	0	0	0	0	0	0	0	0	0	0	0	0	0	0	0	0	0	0	0	0	0	0	0	0	0	0	0	0	0	0	0	0	0	0
hsa-miR-4679	0	0	0	0.248983	0.122489	0.562009	0	0	1.16424	0	0	0	0	0	0	0	0	0	0	0	0	2.70351	0	0	0	0	0	0	0	0	0	0	0	0	0	2.32139	3.64059	0	0	0	0	2.32286	0	0	0	0	0	0	0
hsa-miR-4680-3p	0	0	0	0	0	0	0	0	0.945947	0	0	0	0	0	0	0	0	0	0	0	0	0	0	0	0	0	0	0	0	0	0	0	0	0	0	0	0	0	0	0	0	0	0	0	0	0	0	0	0
hsa-miR-4680-5p	0	0	0	0	0	0.602152	0	0	0	0	0	0	0	0	0	0	0	0	0	0	0	0	0	0	0	0	0	0	0	0	0	0	0	0	0	0	0	0	0	0	0	0	0	0	0	0	0	0	0
hsa-miR-4681	0	0	0	0.248983	0	0	0	0	0	0	0	0	0	0	0	0	0	0	0	0	0	0	0	0	0	0	0	0	0	0	0	0	0	0	0	0	0	0	0	0	0	0	0	0	0	0	0	0	0
hsa-miR-4682	0	0	0	0	0	0	0	0	0	0	0	0	0	0	0	0	0	0	0	0	0	0	0	0	0	0	0	0	0	0	0	0	0	0	0	0	0	0	0	0	0	0	0	0	0	0	0	0	0
hsa-miR-4683	0	0	0	0	0.122489	1.00359	0	0	0.654886	0	0	0	0	0	0	0	0	0	1.62894	1.57441	0	0	0	0	0	0	0	0	0	0	0	0	0	0	0	0	0	0	0	0	0	0	0	0	0	0	0	0	0
hsa-miR-4684-3p	0	0	0	0.186738	0	0	0	0	0	0	0	0	0	0	0	0	0	0	0	0	0	0	0	0	0	0	0	0	0	0	0	0	0	0	0	0	0	0	0	0	0	0	0	0	0	0	0	0	0
hsa-miR-4684-5p	0	0	0	0	0	0.401435	0	0	0	0	0	0	0	0	0	0	0	0	0	0	0	0	0	0	0	0	0	0	0	0	0	0	0	0	0	0	0	0	0	0	0	0	0	0	0	0	0	0	0
hsa-miR-4685-3p	0	0	0.73416	0	0	0.9233	0	0	0.691269	59.0945	57.2254	69.8392	50.142	40.509	74.2106	120.659	69.6123	0	0	0	0	0	2.48925	7.17985	31.1902	33.2592	32.5119	21.2511	26.9116	35.495	40.954	33.2127	37.7955	31.9144	0	3.31627	3.64059	0	2.49616	2.77165	3.57574	1.99102	17.0529	3.03856	22.2027	25.7439	18.9547	31.5761	7.91904
hsa-miR-4685-5p	0	0	0	0	0	0	0	0	0	0	0	0	0	0	0	0	0	0	0	0	0	0	0	0	0	0	0	0	0	0	0	0	0	0	0	0	0	0	0	0	0	0	0	0	0	0	0	0	0
hsa-miR-4686	0	0	0	0	0	0	0	0	0	0	0	0	0	0	0	0	0	0	0	0	0	0	0	0	0	0	0	0	0	0	0	0	0	0	0	0	0	0	0	0	0	0	0	0	0	0	0	0	0
hsa-miR-4687-3p	0	0	0	0	0	1.04373	0	0	0	0	0	0	0	0	0	0	0	0	0	0	0	0	2.48925	0	0	0	0	0	0	0	0	0	0	0	0	0	0	0	0	0	0	0	0	0	0	0	0	0	0
hsa-miR-4687-5p	0	0	0.42826	0	0	0	1.28501	0	0	3.39841	1.72828	3.42349	0.806141	0.550394	1.71585	2.49296	0.964924	0	0	0	0	0	0	0	0.22934	0.455605	0.671733	0.342759	0.412438	0.702872	0.703073	0.73806	0	0	3.12965	1.98976	0	0	0	4.85039	4.08656	0	0.538513	0	1.37539	0	0	1.0334	1.74836
hsa-miR-4688	0	0.858485	0.48944	0.622459	0.489957	0	0	0	0	0	0	0	0	0	0	0	0	0	0	0	0	0	0	0	0	0	0	0	0	0	0	0	0	0	0	0	0	0	0	0	0	2.98653	0	0	0	0	0	0	0
hsa-miR-4689	0	0	0	0	0	0	0	0	0	0	0	0	0	0	0	0	0	0	0	0	0	0	0	0	0	0	0	0	0	0	0	0	0	0	0	0	0	0	0	0	0	0	0	0	0	0	0	0	0
hsa-miR-4690-3p	0	0	0	0	0	0	0	0	0	0	0	0	0.483685	0.330237	0.857926	0	0	0	0	0	0	0	1.86693	0	0	0	0	0	0	0	0	0	0	0	0	0	0	0	0	0	0	0	0	0	0	0	0	0	0
hsa-miR-4690-5p	0	0	0	0	0	1.04373	0	0	0	0	0	0	0	0	0	0	0	0	0	0	0	0	0	0	0	0	0	0	0	0	0	0	0	0	0	0	0	0	0	0	0	0	0	0	0	0	0	0	0
hsa-miR-4691-3p	0	0.198112	0	0	0	0	0	0	0	0	0	0	0	0	0	0	0	0	0	0	0	0	0	0	0	0	0	0	0	0	0	0	0	0	0	0	0	0	0	0	0	0	0	0	0	0	0	0	0
hsa-miR-4691-5p	0	0	0	0	0	0	0	0	0	0	0	0	0	0	0	0	0	0	0	0	0	0	0	0	0	0	0	0	0	0	0	0	0	0	0	0	0	0	0	0	0	0	0	0	0	0	0	0	0
hsa-miR-4692	0	0	0	0	0	0.401435	0	0	0	0	0	0	0	0	0	0	0	0	0	0	0	0	0	0	0	0	0	0	0	0	0	0	0	0	0	0	0	0	0	0	0	0	0	0	0	0	0	0	0
hsa-miR-4693-3p	0	0	0	0	0	0	0	0	0	0	0	0	0	0	0	0	0	0	0	0	0	0	0	0	0	0	0	0	0	0	0	0	0	0	0	0	0	0	0	0	0	0	0	0	0	0	0	0	0
hsa-miR-4693-5p	0	0	0	0	0	0	0	0	0	0	0	0	0	0	0	0	0	0	0	0	0	0	0	0	0	0	0	0	0	0	0	0	0	0	0	0	0	0	0	0	0	0	0	0	0	0	0	0	0
hsa-miR-4694-3p	0	0	0	0	0	0	0	0	0	0	0	0	0	0	0	0	0	0	0	0	0	0	0	0	0	0	0	0	0	0	0	0	0	0	0	0	0	0	0	0	0	0	0	0	0	0	0	0	0
hsa-miR-4694-5p	0	0	0	0	0	0	0	0	0	0	0	0	0	0	0	0	0	0	0	0	0	0	0	0	0	0	0	0	0	0	0	0	0	0	0	0	0	0	0	0	0	0	0	0	0	0	0	0	0
hsa-miR-4695-3p	0	0	0	0	0	0	0	0	0	0.944002	0	0	0	1.43103	0	0	0	0	0	0	0	0	0	0	0	0	0	0	0	0	0	0	0	0	0	0	0	0	0	0	0	0	0	0	0	0	0	0	0
hsa-miR-4695-5p	0	0	0	0	0	0	0	0	0	0	0	0	0	0	0	0	0	0	0	0	0	0	0	0	0	0	0	0	0	0	0	0	0	0	0	0	0	0	0	0	0	0	0	0	0	0	0	0	0
hsa-miR-4696	0	0	0	0.124492	0.306223	0	0	0	0	0	0	0	0	0	0	0	0	0	0	0	0	0	0	0	0	0	0	0	0	0	0	0	0	0	0	0	0	0	0	0	0	0	0	0	0	0	0	0	0
hsa-miR-4697-3p	0	0	0	0	0	0.722582	0	0	0	0	0	0	0	0	0	0	0	0	0	0	0	0	0	0	0	0	0	0	0	0	0	0	0	0	0	0	0	0	1.38675	0	0	2.32286	0	0	0	0	0	0	0
hsa-miR-4697-5p	0	0	0	0	0	0	0	0	0	0	0	0	0	0	0	0	0	0	0	0	0	0	0	0	0	0	0	0	0	0	0	0	0	0	0	0	0	0	0	0	0	0	0	0	0	0	0	0	0
hsa-miR-4698	0	0	0	0	0	0	0	0	0	0	0	0	0	0	0	0	0	0	0	0	0	0	0	0	0	0	0	0	0	0	0	0	0	0	0	0	0	0	0	0	0	0	0	0	0	0	0	0	0
hsa-miR-4699-3p	1.95094	0	0	0	0	0	0	0	0.436591	0	0	0	0	0	0	0	0	0	0	0	0	0	0	0	0	0	0	0	0	0	0	0	0	0	0	0	0	0	0	0	0	0	0	0	0	0	0	0	0
hsa-miR-4699-5p	0	0	0	0	0	0	0	0	0	0	0	0	0	0	0	0	0	0	0	0	0	0	0	0	0	0	0	0	0	0	0	0	0	0	0	0	0	0	0	0	0	0	0	0	0	0	0	0	0
hsa-miR-4700-3p	0	0	0	0	0	0	0	0	0	0	0	0	0	0	0	0	0	0	0	0	0	0	0	0	0	0	0	0	0	0	0	0	0	0	0	0	0	0	0	0	0	0	0	0	0	0	0	0	0
hsa-miR-4700-5p	0	0	0	0	0.183734	0	0	0	0	0	0	0	0	0	0	0	0	0	0	0	0	0	0	0	0	0	0	0	0	0	0	0	0	0	0	0	0	0	0	0	0	0	0	0	0	0	0	0	0
hsa-miR-4701-3p	0	0	0	0	0	0.401435	0	0	0	0	0	0	0	0	0	0	0	0	0	0	0	0	0	0	0	0	0	0	0	0	0	0	0	0	0	0	0	0	0	0	0	0	0	0	0	0	0	0	0
hsa-miR-4701-5p	0	0	0	0	0	0	0	0	0	0	0	0	0	0	0	0	0	0	0	0	0	0	0	0	0	0	0	0	0	0	0	0	0	0	0	0	0	0	0	0	0	0	0	0	0	0	0	0	0
hsa-miR-4703-3p	0	0	0.18354	0	0	0	0	0	1.12786	0	0	0	0	0	0	0	0	0	1.22171	0.944644	0	1.54486	0	0	0	0	0	0	0	0	0	0	0	0	0	0	0	0	0	0	0	0	0	0	0	0	0	0	0
hsa-miR-4703-5p	0	0	0	0	0	0	0	0	0	0	0	0	0	0	0	0	0	0	0	0	0	0	0	0	0	0	0	0	0	0	0	0	0	0	0	0	0	0	0	0	0	0	0	0	0	0	0	0	0
hsa-miR-4704-3p	0	0	0	0	0	0	0	0	1.23701	0	0	0	0	0	0	0	0	0	0	0	0	0	0	0	0	0	0	0	0	0	0	0	0	0	0	0	0	0	0	0	0	0	0	0	0	0	0	0	0
hsa-miR-4704-5p	0	0	0	0	0	0	0	0	0	0	0	0	0	0	0	0	0	0	0	0	0	0	0	0	0	0	0	0	0	0	0	0	0	0	0	0	0	0	0	0	0	0	0	0	0	0	0	0	0
hsa-miR-4705	0	0	0	0	0	0	0	0	0.800417	0	0	0	0	0	0	0	0	5.35309	4.07236	1.88929	0	4.63459	0	2.47581	0	0	0	0	0	0	0	0	0	0	0	0.99488	0	0	1.6641	0.692913	0	0	0	0	0	0	0	0	0
hsa-miR-4706	0.433543	0	0	0	0	0	0	0	0	0	0	0	0	0	0	0	0	0	0	0	0	0	0	0	0	0	0	0	0	0	0	0	0	0	0	0	0	0	0	0	0	0	0	0	0	0	0	0	0
hsa-miR-4707-3p	0	0	0	0	0	0	0	0	0.909564	4.15361	5.37688	3.65172	3.54702	0.660473	5.14755	0.997183	1.10277	0	2.44341	2.51905	0	2.70351	0	0	0.45868	0.341704	0.40304	0	0.412438	0.702872	0.351537	1.03328	0	0	0	2.98464	0	4.9864	3.60556	4.15748	0	1.99102	0	0	0.589452	0	0	0	0.411379
hsa-miR-4707-5p	0	0	0	0	0	0	0	0	0	0	0	0	0	0	0	0	0	0	0	0	0	0	10.8905	0	0	0	0	0	0	0	0	0	0	0	0	0	0	0	0	0	0	0	0	0	0	0	0	0	0
hsa-miR-4708-3p	0	0	0	0	0	0.883156	0	0	0	0	0	0	0	0	0	0	0	0	0	0	0	0	0	0	0	0	0	0	0	0	0	0	0	0	0	0	0	0	0	0	0	0	0	0	0	0	0	0	0
hsa-miR-4709-3p	0	0	0	0	0	0	0	0	0.982329	0	0	0	0	0	0	0	0	0	0	0	0	0	0	0	0	0	0	0	0	0	0	0	0	0	0	0	0	0	0	0	0	0	0	0	0	0	0	0	0
hsa-miR-4709-5p	0	0	0	0	0	0.883156	0	0	0.618504	0	0	0	0	0	0	0	0	0	0	0	0	0	0	0	0	0	0	0	0	0	0	0	0	0	0	0	0	0	0	0	0	0	0	0	0	0	0	0	0
hsa-miR-4710	0	0	0	0	0	0	0	0	0	0	0	0	0	0	0	0	0	0	0	0	0	0	0	1.2379	0	0	0	0	0	0	0	0	0	0	0	0	0	0	0	0	0	0	0	0	0	0	0	0	0
hsa-miR-4711-3p	0	0	0	0	0	0	0	0	0	0	0	0	0	0	0	0	0	0	0	0	0	0	0	0	0	0	0	0	0	0	0	0	0	0	0	0	0	0	0	0	0	0	0	0	0	0	0	0	0
hsa-miR-4711-5p	0	0	0	0	0	0	0	0	0	0	0	0	0	0	0	0	0	0	0	0	0	0	0	0	0	0	0	0	0	0	0	0	0	0	0	0	0	0	0	0	0	0	0	0	0	0	0	0	0
hsa-miR-4712-3p	0	0	0	0	0	0.361291	0	0	0	0	0	0	0	0	0	0	0	0	0	0	0	0	0	0	0	0	0	0	0	0	0	0	0	0	0	0	0	0	0	0	0	0	0	0	0	0	0	0	0
hsa-miR-4712-5p	0	0	0	0	0	0	0	0	0	0	0	0	0	0	0	0	0	0	0	0	0	0	0	0	0	0	0	0	0	0	0	0	0	0	0	0	0	0	0	0	0	0	0	0	0	0	0	0	0
hsa-miR-4713-3p	0	0	0	0	0	0	0	0	0	0	0	0	0	0	0	0	0	0	0	0	0	0	0	0	0	0	0	0	0	0	0	0	0	0	0	0	0	0	0	0	0	0	0	0	0	0	0	0	0
hsa-miR-4713-5p	0	0	0	0	0	0	0	0	0	0	0	0	0	0	0	0	0	0	0	0	0	0	0	0	0	0	0	0	0	0	0	0	0	0	0	0	0	0	0	0	0	0	0	0	0	0	0	0	0
hsa-miR-4714-3p	0	0	0	0	0	1.68603	0.856675	0	0	0	0	0	0	0	0	0	0	0	0	0	0	0	0	0	0.34401	0	0	0	0	0	0	0.442836	0	0	0	0	0	0	0	0	0	0	0	0	0	0	0	0	0
hsa-miR-4714-5p	0	0	0	0	0	0.481722	0	0	0	0	0	0	0.483685	0.330237	0.714938	0	0	0	1.22171	2.51905	0	1.15865	0	0	0	0	0.268693	0	0.206219	0	0.175768	0.442836	0	0	0	1.32651	0	0	0	0	0	1.32735	0	0	0	0	0	0	0
hsa-miR-4715-3p	0	0	0	0	0	0	0	0	0	0	0	0	0	0	0	0	0	0	0	0	0	0	0	0	0	0	0	0	0	0	0	0	0	0	0	0	0	0	0	0	0	0	0	0	0	0	0	0	0
hsa-miR-4715-5p	0	0	0	0	0	0	0	0	0	0	0	0	0	0	0	0	0	0	0	0	0	0	0	0	0	0	0	0	0	0	0	0	0	0	0	0	0	0	0	0	0	0	0	0	0	0	0	0	0
hsa-miR-4716-3p	0	0.132075	0.42826	0.248983	0.244978	0	0	0	0.254678	0	0	0	0	0	0	0	0	0	0	0	0	0	0	0.990324	0	0	0	0	0	0	0	0	0	0	0	0	0	0	0	0	0	0	0	0	0	0	0	0	0
hsa-miR-4716-5p	0	0	0	0	0	0	0	0	0	0	0	0	0	0.330237	0	0	0	0	0	0	0	0	0	0	0	0	0	0	0	0	0	0	0	0	0	0	0	0	0	0	0	0	0	0	0	0	0	0	0
hsa-miR-4717-3p	0	0	0	0	0	0	0	0	0	0	0	0	0	0	0	0	0	0	0	0	0	0	0	0	0	0	0	0	0	0	0	0	0	0	0	0.99488	0	0	0	0	0	0	0	0	0	0	0	0	0
hsa-miR-4717-5p	0	0	0	0	0	0	0	0	0	0	0	0	0	0	0	0	0	0	0	0	0	0	0	0	0	0	0	0	0	0	0	0	0	0	0	0	0	0	0	0	0	0	0	0	0	0	0	0	0
hsa-miR-4718	0	0	0	0	0	0	0	0	0	0	0	0	0	0	0	0	0	0	0	0	0	0	0	0	0	0	0	0	0	0	0	0	0	0	0	0	0	0	0	0	0	0	0	0	0	0	0	0	0
hsa-miR-4719	0	0	0	0	0	0	0	0	0	0	0	0	0	0	0	0	0	0	0	0	0	0	0	0	0	0	0	0	0	0	0	0	0	0	0	0	0	0	0	0	0	0	0	0	0	0	0	0	0
hsa-miR-4720-3p	0	0	0	0	0	0	0	0	0	0	0	0	0	0	0	0	0	0	0	0	0	0	0	0	0	0	0	0	0	0	0	0	0	0	0	0	0	0	0	0	0	0	0	0	0	0	0	0	0
hsa-miR-4720-5p	0	0	0.42826	0	0	0	0	0	0	0	0	0	0	0	0	0	0	0	0	0	0	0	0	0	0	0	0	0	0	0	0	0	0	0	0	0	0	0	0	0	0	0	0	0	0	0	0	0	0
hsa-miR-4721	0	0	0	0	0	0	0	0	0	0	0	0	0	0	0	0	0	0	0	0	0	0	0	0	0	0	0	0	0	0	0	0	0	0	0	0	0	0	0	0	0	0	0	0	0	0	0	0	0
hsa-miR-4722-3p	0	0	0	0	0	0	0	0	0	0	0	0	0	0	0	0	0	0	0	0	0	0	0	0	0	0	0	0	0	0	0	0	0	0	0	0	0	0	0	0	0	0	0	0	0	0	0	0	0
hsa-miR-4722-5p	0	0.198112	0	0	0	0	0	0	0	0	0	0	0	0	0	0	0	0	0	0	0	0	0	0	0	0	0	0	0	0	0	0	0	0	0	0	0	0	0	0	0	0	0	0	0	0	0	0	0
hsa-miR-4723-3p	0	0	0	0	0	0	0	0	0	0	0	0	0	0	0	0	0	0	0	0	0	0	0	0	0	0	0	0	0	0	0	0	0	0	0	0	0	0	0	0	0	0	0	0	0	0	0	0	0
hsa-miR-4723-5p	0	0	0	0	0	0	0	0	0.691269	0	0	0	0	0	0	0	0.275692	0	0	0	0	0	0	0	0	0	0	0	0	0	0	0	0	0	0	0	0	0	0	0	0	0	0	0	0	0	0	0	0
hsa-miR-4724-3p	0	0	0	0	0	0	0	0	0	0	0	0	0	0	0	0	0	0	0	0	0	0	0	0	0	0	0	0	0	0	0	0	0	0	0	0	0	0	0	0	0	0	0	0	0	0	0	0	0
hsa-miR-4724-5p	0	0	0	0.186738	0.122489	0	0	0	1.74636	0	0	0	0	0	0	0	0	0	0	0	0	0	0	0	0	0	0	0	0	0	0	0	0	0	0	0	0	0	0	0	0	0	0	0	0	0	0	0	0
hsa-miR-4725-3p	0	0	0	0	0	0	0	0	0	0	0	0	0	0	0	0	0	0	0	0	0	0	0	0	0	0	0	0	0	0	0	0	0	0	0	0	0	0	0	0	0	0	0	0	0	0	0	0	0
hsa-miR-4725-5p	0	0	0	0	0	0	0	0	0	0	0	0	0	0	0	0	0	0	0	0	0	0	0	0	0	0	0	0	0	0	0	0	0	0	0	0	0	0	0	0	0	0	0	0	0	0	0	0	0
hsa-miR-4726-3p	0	0	0	0	0	0	0	0	0	0	0	0	0	0	0	0	0	0	0	0	0	0	0	0	0	0	0	0	0	0	0	0	0	0	0	0	0	0	0	0	0	0	0	0	0	0	0	0	0
hsa-miR-4726-5p	0	0	0	0	0	0	0	0	0	0	0	0	0	0	0	0	0	0	0	0	0	0	0	0	0	0	0	0	0	0	0	0	0	0	0	0	0	0	0	0	0	0	0	0	0	0	0	0	0
hsa-miR-4727-3p	0	0	0.24472	0.248983	0	0	0	0	0	0	0	0	0	0	0	0	0	0	0	0	0	0	0	0	0	0	0	0	0	0	0	0	0	0	0	0	0	0	0	0	0	0	0	0	0	0	0	0	0
hsa-miR-4727-5p	0	0	0	0	0	0	0	0	0	0	0	0	0	0	0	0	0	0	0	0	0	0	0	0	0	0	0	0	0	0	0	0	0	0	0	0	0	0	0	0	0	0	0	0	0	0	0	0	0
hsa-miR-4728-3p	0	0	0.48944	0	0.79618	0	1.71335	0	0.800417	0.566401	0	1.59763	0.483685	0.660473	0.57195	0	0	0	0	0	0	0	0	0	0	0	0.268693	0	0	0.263577	0	0	0	0	10.6408	6.30091	4.36871	11.6349	5.26966	7.62204	9.19476	6.30489	0	0	0.392968	0	0	0	0.617068
hsa-miR-4728-5p	0	0	0.3059	0	0	0	0	0	0.436591	0	0	0	0	0	0	0	0	0	0	0	0	0	0	0	0	0	0	0	0	0	0	0	0	0	0	1.32651	0	0	0	0	0	0	0	0	0	0	0	0	0
hsa-miR-4729	0	0	0	0	0	0	0	0	0	0	0	0	0	0	0	0	0	0	0	0	0	0	0	0	0	0	0	0	0	0	0	0	0	0	0	0	0	0	0	0	0	0	0	0	0	0	0	0	0
hsa-miR-4730	0	0	0	0	0	0	0	0	0	0	0	0	0	0	0	0	0	0	0	0	0	0	0	0	0	0	0	0	0	0	0	0	0	0	0	0	0	0	0	0	0	0	0	0	0	0	0	0	0
hsa-miR-4731-3p	0	0	0	0	0.367468	0	0	0	0	0	0	0.684698	0	0	0	0	0	0	0	0	0	0	0	1.98065	0	0	0	0	0	0	0	0	0	0	0	0	0	0	0	0	0	0	0	0	0	0	0	0	0
hsa-miR-4731-5p	0	0	0	0	0	0	0	0	0	0	0	0	0	0	0	0	0	0	0	0	0	0	0.933467	3.46613	0	0	0	0	0	0	0	0	0	0	0	0	0	0	0	0	0	0	0	0	0	0	0	0	0
hsa-miR-4732-3p	0	0	0	0	0	1.36488	0.856675	0	0.618504	121.21	134.998	148.123	135.593	145.744	143.274	247.8	157.558	0	0	0	0	0	3.11156	3.9613	244.132	220.741	199.37	202.742	214.571	268.409	288.348	276.772	274.669	283.732	8.76301	2.98464	6.55307	0	0	10.3937	4.08656	4.64571	713.619	166.77	210.14	110.614	210.15	291.075	724.541
hsa-miR-4732-5p	0	12.415	23.1872	17.9268	26.5189	0	0	0	4.72973	8.30722	6.91314	12.781	4.83685	4.73339	7.72133	18.4479	23.9852	0	0	0	0	0	13.0685	37.1371	0.68802	1.36682	2.14955	0.771208	0.721766	1.4936	1.14249	0.442836	1.62911	0.728639	0	0.99488	0	0	0	3.46457	0	0	4.48761	1.63615	6.09101	6.5067	4.73868	7.46345	8.53611
hsa-miR-4733-3p	0	0	0	0	0	0	0	0	0	0	0	0	0	0	0	0	0	0	1.62894	1.57441	0	2.31729	0	0	0	0	0	0	0	0	0	0	0	0	0	0	0	0	0	0	0	0	0	0	0	0	0	0	0
hsa-miR-4733-5p	0	0	0	0	0	0	0	0	0	0	0	0	0	0	0	0	0	0	0	0	0	0	0	0	0	0	0	0	0	0	0	0	0	0	0	0	0	0	0	0	2.04328	0	0	0	0	0	0	0	0
hsa-miR-4734	0	0.594335	0.3059	0.373475	0	0	0	0	0	0	0	0	0	0	0	0	0	0	0	0	0	0	0	0	0	0	0	0	0	0	0	0	0	0	0	0	0	0	0	0	0	0	0	0	0	0	0	0	0.205689
hsa-miR-4735-3p	0	0	0	0	0	0	0	0	0	0	0	0	0	0	0	0	0	0	0	0	0	0	0	0	0	0	0	0	0	0	0	0	0	0	0	0	0	0	0	0	0	0	0	0	0	0	0	0	0
hsa-miR-4735-5p	0	0	0	0	0	0	0	0	0	0	0	0	0	0	0	0	0	0	0	0	0	0	0	1.98065	0	0	0	0	0	0	0	0	0	0	0	0	0	0	0	0	0	0	0	0	0	0	0	0	0
hsa-miR-4736	0	0	0	0	0	0.481722	0	0	0	0	0	0	0	0	0	0	0	0	0	0	0	0	0	0	0	0	0	0	0	0	0	0	0	0	0	0	0	0	0	0	0	0	0	0	0	0	0	0	0
hsa-miR-4737	0	0	0	0	0	0	0	0	0	0	0	0	0	0	0	0	0	0	0	0	0	0	0	0	0	0	0	0	0	0	0	0	0	0	0	0	0	0	0	0	0	0	0	0	0	0	0	0	0
hsa-miR-4738-3p	0	0	0	0.435721	0	0	0	0	0	0	0	0	0	0	1.1439	0	0.551385	0	0	0	0	0	0	0	0	0	0.537386	0	0	0	0	0	0	0	0	0	0	0	0	0	0	0.663673	0	0	0	0	0	0	0
hsa-miR-4738-5p	0	0	0	0	0	0	0	0	0	0	0	0	0	0	0	0	0	0	0	0	0	0	0	0	0	0	0	0	0	0	0	0	0	0	0	0	0	0	0	0	0	0	0	0	0	0	0	0	0
hsa-miR-4739	0	0	0	0	0	0	0	0	0	0	0	0	0	0	0	0	0	0	0	0	0	0	0	0	0	0	0	0	0	0	0	0	0	0	0	0	0	0	0	0	0	0	0	0	0	0	0	0	0
hsa-miR-4740-3p	0	0	0	0	0	0	0	0	0	0	0	0	0	0	0	0	0	0	0	0	0	0	0	0	0	0	0	0	0	0	0	0	0	0	0	0	0	0	0	0	0	0	0	0	0	0	0	0	0
hsa-miR-4740-5p	0	0	0	0	0.551201	0	0	0	0.764034	0	0	0	0	0	0	0	0	0	0	0	0	0	0	0	0	0	0	0	0	0	0	0	0	0	0	0	0	0	4.43761	0	0	0	0	0	0	0	0	0	0
hsa-miR-4741	0	0	0	0.373475	0	0	0	0	0	0	0	0	0	0	0	0	0	0	0	0	0	0	0	0	0	0	0	0	0	0	0	0	0	0	0	0	0	0	0	0	0	0	0	0	0	0	0	0	0
hsa-miR-4742-3p	0	0	0.67298	0.560213	0.489957	0.642296	0	0	0.654886	9.44002	9.60158	17.1175	22.4107	6.82489	13.4408	18.4479	23.1582	0	0	1.25953	0	0	2.48925	1.48549	3.4401	3.18924	3.08997	1.37104	1.85597	2.46005	2.28499	2.65701	1.62911	2.47737	0	0.663254	0	0	3.32821	3.11811	2.5541	0.99551	0.269256	0	1.37539	0	0.824118	0.803756	0.514223
hsa-miR-4742-5p	0	0.396224	0.42826	0.248983	0.612446	0	0	0	0.363826	0	0	0.912931	0.483685	0.330237	0.57195	0	1.24062	0	0	0	0	0	0	0	0	0	0	0	0	0	0	0	0	0	0	0	0	0	0	0	0	0	0	0	0	0	0	0	0
hsa-miR-4743-3p	0	0	0	0	0	0	0	0	0	0	0	0	0	0	0	0	0	0	0	0	0	0	0	0	0	0	0	0	0	0	0	0	0	0	0	0	0	0	0	0	0	0	0	0	0	0	0	0	0
hsa-miR-4743-5p	0	1.12263	1.04006	0.684704	1.04116	0	0	0	0	0	0	0	0	0	0	0	0	0	0	0	0	0	3.11156	0	0	0	0	0	0	0	0	0	0	0	0	0	0	0	0	0	0	0	0	0	0	0	0	0	0
hsa-miR-4744	0	0	0	0	0	0	0	0	0	0	0	0	0	0	0	0	0	0	0	0	0	0	0	0	0	0	0	0	0	0	0	0	0	0	0	0	0	0	0	0	0	0	0	0	0	0	0	0	0
hsa-miR-4745-3p	0	0	0	0	0	0	0	0	0	0	0	0.456466	0	0	1.00091	0	0	0	0	0	0	0	0	0	0.22934	0.227803	0.537386	0.257069	0	0	0	0	0	0	0	0	0	0	0	0	0	0	0	0	0.392968	0.8487	1.03015	0	0.308534
hsa-miR-4745-5p	0	0	0	0	0	0	0	0	0	0	0	0	0	0	0	0	0	0	0	0	0	0	0	0	0	0	0	0	0	0.175718	0	0	0	0	0	0	0	0	0	0	0	0	0	0	0.196484	0	0	0	0
hsa-miR-4746-3p	0	0	0	0	0	0	0	0	0	0	0	0	0	0	0	0	0	0	0	0	0	0	0	0	0	0	0	0	0	0	0	0	0	0	0	0	0	0	0	0	0	0	0	0	0	0	0	0	0
hsa-miR-4746-5p	0	0	0	0	0	1.92689	0	0	1.16424	0	0	1.14116	0	0	0.714938	0	1.24062	0	0	1.25953	0	0	4.35618	0	2.40807	3.64484	3.08997	4.11311	2.99017	2.89935	2.1971	3.83791	3.58405	3.35174	7.51115	0	5.82495	0	3.60556	5.88976	0	0	0.448761	0	2.55429	2.829	2.47235	1.60751	0.719913
hsa-miR-4747-3p	0	0	0	0	0	0	0	0	0	0	0.384063	0	0	0	0	0	0.413539	0	0	0	0	0	0	0	0	0	0	0	0	0	0	0	0	0	0	0	0	0	0	0	0	0	0	0	0	0	0	0	0
hsa-miR-4747-5p	0	0	0	0.373475	0.367468	0	0	0	0	0	0	0	0	0	0	0	0	0	0	0	0	0	0	0	0	0	0	0	0	0	0	0	0	0	0	0	0	0	0	0	0	0	0	0	0	0	0	0	0
hsa-miR-4748	0	0.396224	0.12236	0	0.122489	0.642296	0	0	0	0	0	0	0	0	0	0	0	0	0	0	0	0	0	0	0	0	0	0	0	0	0	0	0	0	0	0	0	0	0	0	0	0	0	0	0	0	0	0.229645	0
hsa-miR-4749-3p	0	0	0	0	0	0	0	0	0	0	0	0	0	0	0	0	0	0	0	0	0	0	0	0	0	0.569506	0	0	0	0	0	0	0.814557	0	0	0	0	0	0	0	0	0	0.718017	0	0	0	0.412059	0.574112	1.95405
hsa-miR-4749-5p	0	0.858485	0.48944	0.373475	0.428712	0	0	0	0	0	0	0	0	0	0	0	0	0	0	0	0	0	0	2.47581	0	0	0	0	0	0	0	0	0	0	0	0	0	0	1.38675	0	0	0	0	0	0	0	0	0	0
hsa-miR-4750-3p	0	0	0	0	0	0	0	0	0	0	0	0	0	0	0	0	0	0	0	0	0	0	0	0	0	0	0	0	0	0	0	0	0	0	0	0	0	0	0	0	0	0	0	0	0	0	0	0	0
hsa-miR-4750-5p	0	2.3113	1.59068	1.61839	1.95983	0	0	0	0	0	0	0	0	0	0	0	0	0	0	0	0	0	0	0	0	0	0	0	0	0	0	0	0	0	0	1.32651	0	0	0	2.4252	0	0	0	0	0	0	0	0	0
hsa-miR-4751	0	0	0	0	0	0	0	0	0	0	0	0	0	0	0	0	0	0	0	0	0	0	0	1.98065	0	0	0	0	0	0	0	0	0	0	0	0	0	0	0	0	0	0	0	0	0	0	0	0	0
hsa-miR-4752	0	0	0	0	0	0	0	0	0.109148	0	0	0	0	0	0	0	0	0	0	0	0	0	0	0	0	0	0	0	0	0	0	0	0	0	0	0	0	0	0	0	0	0	0	0	0	0	0	0	0
hsa-miR-4753-3p	0	0	0	0	0	0	0	0	0	0	0	1.14116	0.806141	0.770552	0.428963	0	0	0	0	0	0	0	0	0	0	0	0	0	0	0	0	0	0	0	0	0	0	0	0	0	0	0	0	0	0	0	0	0	0
hsa-miR-4753-5p	0	0	0	0	0.306223	0	0	0	0	0	0	0	0	0	0	0	0	0	0	0	0	0	0	0	0	0.227803	0	0	0	0	0.175768	0	0	0	0	0	0	0	0	0	0	0	0	0	0	0	0	0	0.205689
hsa-miR-4754	0	0.264149	0.18354	0	0	0	0	0	0	0	0	0	0	0	0	0	0	0	0	0	0	0	0	0	0	0	0	0	0	0	0	0	0	0	0	0	0	0	0	0	0	0	0	0	0	0	0	0	0
hsa-miR-4755-3p	0	0	0	0	0	0	0	0	0	0	0	0	0.483685	0	0	0	0	0	0	0	0	0	0	0	0	0	0	0	0	0	0	0	0	0	0	0	0	0	0	0	0	0	0	0	0.49121	0	0	0	0
hsa-miR-4755-5p	0	0	0	0	0.306223	0	0	0	0	1.5104	1.34422	2.73879	2.09597	3.74268	2.14481	3.98873	2.61908	0	0	1.88929	0	0	0	0	0	0.455605	0.268693	0.599828	0.515547	0.702872	0.263652	0.295224	0.488734	0.291456	0	0	0	0	0	0	3.57574	0	0	0	0.49121	0.5658	0	0	0
hsa-miR-4756-3p	0	0	0	0	0	0	0	0	0	0	0	0	0	0	0	0	0	0	0	0	0	0	0	0	0	0	0	0	0	0	0	0	0	0	0	0	0	0	0	0	0	0	0	0	0	0	0	0	0
hsa-miR-4756-5p	0	0	0	0	0	0	0	0	0	0	0	0	0	0	0	0	0	0	0	0	0	0	0	0	0	0	0	0	0	0	0	0	0	0	0	0	0	0	0	0	0	0	0	0	0	0	0	0	0
hsa-miR-4757-3p	0	0	0.55062	0	0	1.8466	0	0	0	0	0	0	0	0	0	0	0	0	0	0	0	0	0	0	0.22934	0.227803	0	0	0	0.439295	0	0.295224	0	0	0	0	0	1.66213	2.2188	3.81102	0	0	0	0	0	0	0	0	0
hsa-miR-4757-5p	0	0.132075	0	0	0	0	0	0	0.327443	0	0	0	0	0	0	0	0	0	0	0	0	0	0	0	0	0	0	0	0	0	0	0	0	0	0	0	0	0	0	0	0	0	0	0	0	0	0	0	0
hsa-miR-4758-3p	0	0	0	0	0	0	0	0	0	0	0	0.684698	0	0	0	0	0	0	0	0	0	0	0	0	0	0	0	0	0	0	0	0	0	0	0	0	0	0	0	0	0	0	0	0	0	0	0	0	0
hsa-miR-4758-5p	0	0	0	0	0	0	0	0	0	0	0	0	0	0	0	0	0	0	0	0	0	0	0	0	0	0	0	0	0	0	0	0	0	0	0	0	0	0	0	0	0	0	0	0	0	0	0	0	0
hsa-miR-4759	0	0	0	0	0	0	0	0	0	0	0	0	0	0	0	0	0	0	0	0	0	0	0	0	0	0	0	0	0	0	0	0	0	0	0	0	0	0	0	0	0	0	0	0	0	0	0	0	0
hsa-miR-4760-3p	0	0	0	0	0	0	0	0	0	0	0	0	0	0	0	0	0	0	0	0	0	0	0	0	0	0	0	0	0	0	0	0	0	0	0	0	0	0	0	0	0	0	0	0	0	0	0	0	0
hsa-miR-4760-5p	0	0	0	0	0	0	0	0	0	0	0	0	0	0	0	0	0	0	0	0	0	0	0	0	0	0	0	0	0	0	0	0	0	0	0	0	0	0	0	0	0	0	0	0	0	0	0	0	0
hsa-miR-4761-3p	0	0	0	0	0	0	0	0	0	0	0	0	0	0	0	0	0	0	0	0	0	0	0	0	0	0	0	0	0	0	0	0	0	0	0	0	0	0	0	0	0	0	0	0	0	0	0	0	0
hsa-miR-4761-5p	0	0	0	0	0	0	0	0	0	0	0	0	0	0	0	0	0	0	0	0	0	0	0	0	0	0	0	0	0	0	0	0	0	0	0	0	0	0	0	0	0	0	0	0	0	0	0	0	0
hsa-miR-4762-3p	0	0	0	0.186738	0	0	0	0	0	0	0	0	0	0	0	0	0	0	0	0	0	0	0	0	0	0	0	0	0	0	0	0	0	0	0	0	0	0	0	0	0	0	0	0	0	0	0	0	0
hsa-miR-4762-5p	0	0	0	0	0	0.441578	0	0	0	0	0	0	0	0	0	0	0	0	0	0	0	0	0	0	0.45868	0.341704	0.268693	0.257069	0	0	0.351537	0.295224	0	0	0	0	0	0	0	0	0	0	0	0	0.884178	0	0	0	0
hsa-miR-4763-3p	0	0	0	0	0	0	0	0	0	0	0	0	0	0	0	0	0	0	0	0	0	0	0	0	0	0	0	0	0	0	0	0	0	0	0	0	0	0	0	0	0	0	0	0	0	0	0	0	0
hsa-miR-4763-5p	0	0	0	0	0	0	0	0	0	0	0	0	0	0	0	0	0	0	0	0	0	0	0	0	0	0	0	0	0	0	0	0	0	0	0	0	0	0	0	0	0	0	0	0	0	0	0	0	0
hsa-miR-4764-3p	0	0	0	0	0	0	0	0	0	0	0	0	0	0	0	0	0	0	0	0	0	0	0	0	0	0	0	0	0	0	0	0	0	0	0	0	0	0	0	0	0	0	0	0	0	0	0	0	0
hsa-miR-4764-5p	0	0	0	0.248983	0	0	0	0	0	0	0	0	0	0	0	0	0	0	0	0	0	0	0	0	0	0	0	0	0	0	0	0	0	0	0	0	0	0	0	0	0	0	0	0	0	0	0	0	0
hsa-miR-4765	0	0	0	0	0	0	0	0	0	0	0	0	0	0	0	0	0	0	0	0	0	0	0	0	0	0	0	0	0	0	0	0	0	0	0	0	0	0	0	0	0	0	0	0	0	0	0	0	0
hsa-miR-4766-3p	0	0	0	0	0	0.361291	0	0	0.545739	0	0	0	0	0	0	0	0	0	0	0	0	2.31729	0	0	0	0	0	0	0	0	0	0	0	0	0	0	0	0	0	0	0	0	0	0	0	0	0	0	0
hsa-miR-4766-5p	0	0	0	0	0	0	0	0	0.873182	0	0	0	0	0	0	0	0	0	0	0	0	0	0	0	0	0	0	0	0	0	0	0	0	0	0	0	0	0	0	0	0	0	0	0	0	0	0	0	0
hsa-miR-4767	0	0	0	0	0	3.01076	0	2.5362	1.52807	0	0	0	0	0	0	0	0	0	0	0	0	0	0	0	0	0	0	0	0	0.263577	0	0.442836	0	0	6.88522	0	6.55307	0	0	0	0	2.98653	0	0	0	0	0	0.344467	0
hsa-miR-4768-3p	0	0	0	0	0	0	0	0	0	0	0	0	0	0	0	0	0	0	0	0	0	0	0	0	0	0	0	0	0	0	0	0	0	0	0	0	0	0	0	0	0	0	0	0	0	0	0	0	0
hsa-miR-4768-5p	0	0	0	0	0.122489	0.722582	0	0	0.14553	0	0	0	0	0	0	0	0	0	0	1.88929	0	0	0	0	0	0	0	0	0	0	0	0	0	0	0	0	0	0	2.2188	0	0	0	0	0	0	0	0	0	0
hsa-miR-4769-3p	0	0	0	0	0	0	0	0	0	0	0	0	0	0	0	0	0	0	0	0	0	0	0	0	0	0	0	0	0	0	0	0	0	0	0	0	0	0	0	0	0	0	0	0	0	0	0	0	0
hsa-miR-4769-5p	0	0	0	0.248983	0	0	0	0	0	0	0	0	0	0	0	0	0	0	0	0	0	0	0	0	0	0	0	0	0	0	0	0	0	0	0	0	0	0	0	0	0	0	0	0	0	0	0	0	0
hsa-miR-4770	0	29.7168	0	0	18.2509	0	0	0	0	0	0	0	0	0	0	0	0	0	0	0	0	0	0	0	0	0	0	0	0	0	0	0	0	0	0	0	0	0	0	0	0	0	0	0	0	0	0	0	0
hsa-miR-4771	0	0	0	0	0	0	0	0	0	0	0	0	0	0	0	0	0	0	0	0	0	0	0	0	0	0	0	0	0	0	0	0	0	0	0	0	0	0	0	0	0	0	0	0	0	0	0	0	0
hsa-miR-4772-3p	0	0	0	0	0	0.521865	0	0	0.400208	0	0.768126	0	0	0.880631	0.57195	0	0	0	1.22171	0	0	3.47594	5.6008	6.18952	0	0.455605	0	0	0.412438	0	0.263652	0	0	0	0	0	0	0	0	0	0	0	0	0	0	0	0	0	0
hsa-miR-4772-5p	0	0.198112	0.42826	0	0	1.32473	0	0	5.71206	0	0.768126	0	0	0	0	0	0	5.35309	2.44341	5.98275	0	2.70351	0	0	0	0	0	0	0	0	0	0	0	0	0	2.65301	4.36871	0	0	2.77165	0	0.99551	0	0	0	0	0	0	0
hsa-miR-4773	0	0	0	0.186738	0	0	0	0	0.509356	0	1.72828	0	0	0	0	0	0	0	0	0	0	0	0	3.71371	0	0	0	0	0.309328	0	0	0	0	0	0	0	0	0	0	0	0	0	0	0	0	0	0	0	0
hsa-miR-4774-3p	0	0	0	0	0	0	0	0	0	0	0	0	0	0	0	0	0	0	0	0	0	0	0	0	0	0	0	0	0	0	0	0	0	0	0	0	0	0	0	0	0	0	0	0	0	0	0	0	0
hsa-miR-4774-5p	0	0	0	0.311229	0.244978	0	0	0	0	0	0	0	0	0	0	0	0	0	0	0	0	0	0	0	0	0	0	0	0	0	0	0	0	0	0	0	0	0	0	0	0	0	0	0	0	0	0	0	0
hsa-miR-4775	0	0.858485	0.36708	0.311229	0	2.64947	3.85504	1.52172	0.836799	0.377601	0.768126	0	0.322456	0	0	0	0	0	0	0	0	3.86216	0	0	0	0.341704	0	0	0	0.175718	0	0	0	0	3.12965	1.98976	4.36871	0	3.32821	4.85039	2.5541	3.6502	0	0	0	0	0	0	0
hsa-miR-4776-3p	0	0	0	0	0	0	0	0	0	0	0	0	0	0	0	0	0	0	0	0	0	0	0	0	0	0	0	0	0	0	0	0	0	0	0	0	0	0	0	0	0	0	0	0	0	0	0	0	0
hsa-miR-4776-5p	0	0	0	0	0	0	0	0	0	0	0	0	0	0	0	0	0	0	0	0	0	0	0	0	0	0	0	0	0	0	0	0	0	0	0	0	0	0	0	0	0	0	0	0	0	0	0	0	0
hsa-miR-4777-3p	0	0	0	0	0	0.361291	0	0	1.12786	0	0	0	0	0	0	0	0	0	0	0	0	0	0	0	0	0	0	0	0	0	0	0	0	0	0	0	0	0	0	0	0	0	0	0	0	0	0	0	0
hsa-miR-4777-5p	0	0	0	0	0	0	0	0	0	0	0	0	0	0	0	0	0	0	0	0	0	0	0	0	0	0	0	0	0	0	0	0	0	0	0	0	0	0	0	0	0	0	0	0	0	0	0	0	0
hsa-miR-4778-3p	0	0	0	0	0	0	0	0	0	0	0	0	0	0	0	0	0	0	0	0	0	0	0	0	0	0	0	0	0	0	0	0	0	0	0	0	0	0	0	0	0	0	0	0	0	0	0	0	0
hsa-miR-4778-5p	0	0	0	0	0	0	0	0	0.509356	0	0	0	0	0	0	0	0	0	0	0	0	0	0	0	0	0	0	0	0	0	0	0	0	0	0	0	0	0	0	0	0	0	0	0	0	0	0	0	0
hsa-miR-4779	0	0	0	0	0	0	0	0	0	0	0	0	0	0	0	0	0	0	0	0	0	0	0	0	0	0	0	0	0	0	0	0	0	0	0	0	0	0	0	0	0	0	0	0	0	0	0	0	0
hsa-miR-4780	0	0	0	0	0	0	0	0	0	0	0	0	0	0	0	0	0	0	1.22171	0	0	0	0	0	0	0	0	0	0	0	0	0	0	0	0	0	0	0	0	0	0	0	0	0	0	0	0	0	0
hsa-miR-4781-3p	0	0.198112	0.3059	0.311229	0	1.00359	1.28501	0	1.38254	2.64321	2.11235	2.51056	3.86948	2.97213	3.4317	2.99155	2.06769	0	1.22171	2.51905	0	1.15865	0	0	3.66944	3.41704	2.55259	1.28535	1.85597	2.63577	2.28499	3.09985	2.44367	2.18592	1.87779	1.98976	0	4.9864	1.6641	2.4252	1.53246	2.98653	0	0	0	0	0	0	0
hsa-miR-4781-5p	0	0	0	0	0	0	0	0	0	0.755202	0	0	0.806141	0	0.857926	0	0.551385	0	0	0	0	0	0	0	0	0	0	0	0	0	0	0	0	0	0	0	0	0	0	0	0	0	0	0	0	0	0	0	0
hsa-miR-4782-3p	0	0	0	0	0	0	0	0	0	0	0	0	0	0	0	0	0	0	0	0	0	0	0	0	0	0	0	0	0	0	0	0	0	0	0	0	0	0	0	0	0	0	0	0	0	0	0	0	0
hsa-miR-4782-5p	0	0	0	0	0	0	0	0	0.654886	0	0	0	0	0	0	0	0	0	0	0	0	0	0	0	0	0	0	0	0	0	0	0	0	0	0	0	0	0	0	0	0	0	0	0	0	0	0	0	0
hsa-miR-4783-3p	0	0	0	0	0	0	0	0	0	0	0	0	0	0	0	0	0	0	0	0	0	0	0	0	0	0	0	0	0	0	0	0	0	0	0	0	0	0	0	0	0	0	0	0	0	0	0	0	0
hsa-miR-4783-5p	0	0	0	0	0	0	0	0	0	0	0	0	0	0	0	0	0	0	0	0	0	0	0	0	0	0	0	0	0	0	0	0	0	0	0	0	0	0	0	0	0	0	0	0	0	0	0	0	0
hsa-miR-4784	0	0	0	0	0	0	0	0	0	0	0	0	0	0	0	0	0	0	0	0	0	0	0	0	0	0	0	0	0	0	0	0	0	0	0	0	0	0	0	0	0	0	0	0	0	0	0	0	0
hsa-miR-4785	0	39.0941	57.3868	78.9277	0	3.93406	0	0	72.9107	0	0	0	0	0	0	0	0	0	0	0	0	0	0	48.0307	0	0	0	0	0	0	0	0	0	0	0	6.96416	0	0	6.10171	0	0	0	0	0	0	0	0	0	0
hsa-miR-4786-3p	0	0	0	0	0	0	0	0	0	0	0	0	0	0	0	0	0	0	0	0	0	0	0	0	0	0	0	0	0	0	0	0	0	0	0	0	0	0	0	0	0	0	0	0	0	0	0	0	0
hsa-miR-4786-5p	0	0	0	0	0.183734	1.52545	0	0	1.49169	0.755202	0	0	0	0	0	0	0	0	0	0	0	0	0	0	0.34401	0.341704	0	0	0	0	0.263652	0	0	0	0	0	0	0	0	0	0	0	0	0	0	0	0	0	0
hsa-miR-4787-3p	0.867086	1.71697	1.65186	1.24492	0.79618	3.85377	0	0	1.01871	0	0	0	0	0	0	0	0	0	0	2.20417	0	0	0	0	0	0	0	0	0	0	0	0	0	0	4.3815	1.32651	5.09683	0	3.60556	5.19685	4.08656	3.31837	0	0	0	0	0	0	0
hsa-miR-4787-5p	0	0	0	0	0	0	0	0	0	0	0	0	0	0	0	0	0	0	0	0	0	0	0	11.3887	0	0	0	0	0	0	0	0	0	0	0	0	0	0	0	0	0	0	0	0	0	0	0	0	0
hsa-miR-4788	0	0	0	0	0	0.562009	0	0	0	0	0	0	0	0	0	0	0	0	0	0.944644	0	1.54486	0	0	0	0	0	0	0	0	0	0	0	0	0	0	0	0	0	0	0	0	0	0	0	0	0	0	0
hsa-miR-4789-3p	0	0	0	0	0	0	0	0	0.218295	0	0	0	0	0	0	0	0	0	0	0	0	0	0	0	0	0	0	0	0	0	0	0	0	0	0	0	0	0	0	0	0	0	0	0	0	0	0	0	0
hsa-miR-4789-5p	0	0	0	0	0	0	0	0	0	0	0	0	0	0	0	0	0	0	0	0	0	0	0	0	0	0	0	0	0	0	0	0	0	0	0	0	0	0	0	0	0	0	0	0	0	0	0	0	0
hsa-miR-4790-3p	0	0	0	0	0	0	0	0	0	0	0	0	0	0	0	0	0	0	0	0	0	0	0	0	0	0	0	0	0	0	0	0	0	0	0	0	0	0	0	0	0	0	0	0	0	0	0	0	0
hsa-miR-4790-5p	0	0	0	0	0	0	0	0	0	0	0	0	0	0	0	0	0	0	0	0	0	0	0	0	0	0	0	0	0	0	0	0	0	0	0	0	0	0	0	0	0	0	0	0	0	0	0	0	0
hsa-miR-4791	0	0	0	0	0	0	0	0	18.264	0	0	0	0	0	0	0	0	0	0	0	0	4.63459	0	4.95162	0	0	0	0	0	0	0	0	0	0	2.50372	0	0	0	0	0	0	0	0	0	0	0	0	0	0
hsa-miR-4792	0	0	0	0	0	0	0	0	0	0	0	0	0	0	0	0	0	0	0	0	0	0	0	0	0	0	0	0	0	0	0	0	0	0	0	0	0	0	0	0	0	0	0	0	0	0	0	0	0
hsa-miR-4793-3p	0	0	0	0	0	0	0	0	0	0	0	0	0	0	0	0	0	0	0	0	0	0	0	0	0	0	0	0	0	0	0	0	0	0	0	0	0	0	0	0	0	0	0	0	0	0	0	0	0
hsa-miR-4793-5p	0	0	0	0	0	0	0	0	0	0	0	0	0	0	0	0	0	0	0	0	0	0	0	0	0	0	0	0	0	0	0	0	0	0	0	0	0	0	0	0	0	0	0	0	0	0	0	0	0
hsa-miR-4794	0	0	0	0	0	0	0	0	0	0	0	0	0	0	0	0	0	0	0	0	0	0	0	0	0	0	0	0	0	0	0	0	0	0	0	0	0	0	0	0	0	0	0	0	0	0	0	0	0
hsa-miR-4795-3p	0	0	0	0	0	0	0	0	0.618504	0	0	0	0	0	0	0	0	0	0	0	0	0	0	0	0	0	0	0	0	0	0	0	0	0	0	0	0	0	0	0	0	0	0	0	0	0	0	0	0
hsa-miR-4795-5p	0	0	0	0	0	0	0	0	0.181913	0	0	0	0	0	0	0	0	0	0	0	0	0	0	0	0	0	0	0	0	0	0	0	0	0	0	0	0	0	0	0	0	0	0	0	0	0	0	0	0
hsa-miR-4796-3p	0	0.198112	0.18354	0.248983	0.367468	0	0	0	0	0	0	0	0	0	0	0	0	31.3538	10.5881	8.18692	54.4533	18.9246	0	0	0	0	0	0	0	0	0	0	0	0	0	0	0	0	3.05086	0	0	0	0	0	0	0	0	0	0
hsa-miR-4796-5p	0	0	0	0	0	0	0	0	0	0	0	0	0	0	0	0	0	0	0	0	0	0	0	1.73307	0	0	0	0	0	0	0	0	0	0	0	0	0	0	0	0	0	0	0	0	0	0	0	0	0
hsa-miR-4797-3p	1.08386	0	0	0	0	0	0	0	7.96778	0	0.384063	0	0	0	0	0	0	0	0	0	0	0	0	0	0	0	0	0	0	0.175718	0	0	0	0	0	0	0	0	2.2188	0	0	0	0	0	0	0	0	0	0
hsa-miR-4798-3p	0	0	0	0	0	0	0	0	0	0	0	0	0	0	0	0	0	0	0	0	0	0	0	0	0	0	0	0	0	0	0	0	0	0	0	0	0	0	0	0	0	0	0	0	0	0	0	0	0
hsa-miR-4798-5p	0	0	0.12236	0	0	0	0	0	0.472973	0	0	0	0	0	0	0	0	0	0	0	0	0	0	0	0	0	0	0	0	0	0	0	0	0	0	0	0	0	0	0	0	0	0	0	0	0	0	0	0
hsa-miR-4799-3p	0	0	0	0	0	0	0	0	0	0	0	0	0	0	0	0	0	0	0	0	0	0	0	0	0	0	0	0	0	0	0	0	0	0	0	0	0	0	0	0	0	0	0	0	0	0	0	0	0
hsa-miR-4799-5p	0	0	0	0	0	0.802869	0	0	0.727651	0	0	0	0	0	0	0	0	0	0	0	0	0	0	0	0	0	0	0	0	0	0	0	0	0	0	0	0	0	0	0	0	0	0	0	0	0	0	0	0
hsa-miR-4800-3p	0	0	0	0	0	0	0	0	0	0	0	0	0	0	0	0	0	0	0	0	0	0	0	0	0	0	0	0	0	0	0	0	0	0	10.0149	2.65301	0	0	0	0	0	1.65918	0	0	0	0	0	0	0
hsa-miR-4800-5p	0	0	0.12236	0	0.306223	0	0	0	0.509356	0	0	0	0	0	0	0	0	0	0	0	0	0	0	0	0	0	0	0	0	0	0	0	0	0	0	0	0	0	0	6.23622	0	1.65918	0	0	0	0	0	0	0
hsa-miR-4801	0	0	0	0	0	0	0	0	0	0	0	0	0	0	0	0	0	0	0	0	0	0	0	0	0	0	0	0	0	0	0	0	0	0	0	0	0	0	0	0	0	0	0	0	0	0	0	0	0
hsa-miR-4802-3p	0	0	0.12236	0	0	0	0	0	3.71102	0	0	0	0	0	0	0	0	0	0	0	0	1.54486	0	0	0	0	0	0	0	0	0	0	0	0	10.0149	1.32651	0	4.9864	3.05086	2.4252	0	0	0	0	0	0	0	0	0
hsa-miR-4802-5p	0	0	0	0	0	0.802869	0	0	0.582121	0	0	0	0	0	0	0	0	4.58836	2.85065	4.72322	4.32169	2.70351	0	0	0	0	0	0	0	0	0	0	0	0	0	2.32139	2.91248	0	2.49616	3.46457	4.08656	1.32735	0	0	0	0	0	0	0
hsa-miR-4803	0	0	0	0	0	0	0	0	0	0	0	0	0	0	0	0	0	0	0	0	0	0	0	0	0	0	0	0	0	0	0	0	0	0	0	0	0	0	0	0	0	0	0	0	0	0	0	0	0
hsa-miR-4804-3p	0	0	0	0	0	0	0	0	0	4.53121	4.22469	1.3694	3.54702	5.17371	2.43079	1.99437	1.92985	0	0	0	0	0	0	0	0	0.227803	0.80608	0	0.412438	0	0.175768	0	0	0	0	0	0	0	0	0	0	0	0	0	0	0	0	0	0
hsa-miR-4804-5p	0	0	0	0	0	0	0	0	0	0	0	0	0	0	0	0	0	0	0	0	0	0	0	0	0	0	0	0	0	0	0	0	0	0	0	0	0	0	0	0	0	0	0	0	0	0	0	0	0
hsa-miR-483-3p	14.3069	0.72641	0.9177	1.4939	1.16365	2.52904	37.6937	36.014	0.582121	1.1328	0	0.684698	0	0	1.00091	0	0	7.64727	8.95919	30.8584	0	16.9935	20.2251	8.91291	0	0	0	0	0	0	0	0	0	0	4.3815	1.98976	4.36871	3.32427	1.94145	3.11811	6.64066	2.32286	0	0	0	0	0	0	0
hsa-miR-483-5p	2.60126	15.2546	17.7422	19.1717	20.0882	0.963443	20.1319	21.3041	0.691269	0	0	0	0	0	0	0	0	8.41199	8.14472	12.2804	0	13.5175	18.9805	12.1315	0	0	0	0	0	0	0	0	0	0	0	1.65813	0	4.9864	4.16026	3.81102	0	1.99102	0	0	0	0	0	0	0
hsa-miR-484	114.672	33.613	31.263	38.5302	43.1162	203.287	228.304	195.287	61.9595	7145.91	7141.46	6926.41	6230.99	5708.36	6636.91	10268	7315.36	331.891	504.158	875.37	437.355	468.866	328.269	486.992	1672.58	1726.63	1605.71	1193.66	1297.63	1506.17	1469.33	1372.64	1308.18	1290.71	272.905	311.398	444.153	307.495	245.733	317.701	314.665	175.542	124.666	47.0976	781.515	576.268	688.963	173.841	219.059
hsa-miR-485-3p	2.60126	9.44333	11.0124	9.0879	9.00296	4.77707	3.85504	2.02896	0.654886	1.5104	2.30438	5.93405	1.77351	5.28379	4.86158	15.4563	6.89231	19.1182	12.6243	20.7822	11.2364	16.2211	8.09005	24.5105	1.1467	0.797309	0.671733	0.942588	0.618657	0.87859	0.527305	0.590448	0.814557	0.874367	3.75557	3.31627	5.09683	4.15533	0	4.15748	0	0.99551	0.269256	0	0.884178	1.1316	1.03015	0.344467	0
hsa-miR-485-5p	1.5174	38.5658	65.952	52.5977	60.081	3.0509	1.28501	1.52172	0.363826	0	0	0	0	0	0	0	0.689231	28.2949	26.8776	40.9346	19.8798	17.7659	45.7399	51.992	0	0	0	0	0	0	0	0	0	0	3.12965	2.98464	2.18436	0	1.38675	2.07874	0	1.99102	0	0	0	0	0	0	0
hsa-miR-486-3p/486-5p	4670.99	1989.7	3221.62	2653.29	4162.73	930.285	8130.27	7679.61	550.359	518992	532372	541155	426437	718173	457576	617073	606014	22.9418	95.2932	100.447	70.8758	73.7672	979.207	1393.14	861893	857968	861574	875224	865865	857867	857310	861186	864572	865758	11393.8	31510.2	37927	31878.9	7115.43	48285.6	26225	21782.4	921170	979818	746859	844164	784840	829291	822033
hsa-miR-487a-3p	0	0.330186	0.12236	0.871442	0.428712	2.28818	1.28501	2.5362	0.945947	0.377601	0	0	0	0	0.285975	0	0	37.4716	27.2848	29.9137	26.7945	29.7386	26.1371	22.0347	0	0	0	0	0	0	0	0	0	0	0	1.65813	3.64059	0	1.6641	1.73228	5.1082	2.32286	0	0	0	0	0	0	0
hsa-miR-487a-5p	0	0.330186	0.48944	0.622459	0.79618	0	0	0	0.254678	0	0	0	0	0	0	0	0.275692	0	1.22171	2.51905	3.45735	3.08972	7.7789	23.2726	0	0	0	0	0	0	0	0	0	0	0	0	2.91248	0	0	0	0	0	0	0	0	0	0	0	0
hsa-miR-487b-3p	3.90189	26.4149	35.1785	47.9916	32.7046	18.1448	9.85176	3.55068	1.70998	0.566401	0	0	0.322456	0.770552	0	0	1.37846	420.6	444.701	694.313	351.786	427.541	45.7399	114.382	0	0	0	0	0	0	0	0	0	0	5.00743	6.96416	7.28119	3.32427	6.10171	4.85039	3.57574	4.64571	0	0	0	0	0	0	0
hsa-miR-487b-5p	0	0	0	0	0	1.48531	0	0	0	0	0	0	0	0	0	0	0	0	0	1.57441	0	2.31729	1.55578	0	0	0	0	0	0	0	0	0	0	0	0	0	0	0	0	0	0	0	0	0	0	0	0	0	0
hsa-miR-488-3p	0	0	0	0	0	0.843013	0	0	2.32848	0	0	0	0	0	0	0	0	3.82363	3.66512	0	7.77905	6.17945	11.2016	20.0541	0	0	0	0	0	0	0	0	0	0	0	0	2.18436	0	0	0	0	0	0	0	0	0	0	0	0
hsa-miR-488-5p	0	0.198112	0.18354	0.124492	0.122489	0	0	0	0	0	0	0	0	0	0	0	0	0	0	0	0	0	1.86693	2.72339	0	0	0	0	0	0	0	0	0	0	0	0	0	0	0	0	0	0	0	0	0	0	0	0	0
hsa-miR-489-3p	2.38449	0.330186	0.73416	0.995934	0.489957	1.96703	1.28501	1.52172	8.1497	0	0	0	0	0	0	0	0	8.41199	13.4388	8.5018	6.91471	6.95188	0	3.9613	0	0	0	0	0	0	0	0	0	0	6.25929	5.30603	7.28119	2.4932	2.2188	2.4252	3.57574	3.6502	0	0	0	0	0	0	0
hsa-miR-489-5p	0	0	0	0	0	0	0	0	0	0	0	0	0	0	0	0	0	0	0	0	0	0	0	0	0	0	0	0	0	0	0	0	0	0	0	0	0	0	0	0	0	0	0	0	0	0	0	0	0
hsa-miR-490-3p	0	8.91503	19.6388	12.7604	17.026	124.204	8.99508	11.1593	0.909564	0	0	0	0	0	0	0	0	0	2.03618	5.35298	5.18603	10.4278	0	0	0	0	0	0	0	0	0	0	0	0	0	0	0	5.81747	0	0	0	1.99102	0	0	0	0	0	0	0
hsa-miR-490-5p	0	2.17923	1.71304	1.92962	1.59236	6.38281	0	0	0	0	0	0	0	0	0	0	0	2.29418	0	0	0	0	0	1.48549	0	0	0	0	0	0	0	0	0	0	0	0	0	0	0	0	0	0	0	0	0	0	0	0	0
hsa-miR-491-3p	0.867086	0	0.18354	0.373475	0	0.401435	0	0	1.09148	0	0	0	0	0	0	0	0	3.82363	3.25789	2.20417	4.32169	0	0	0	0	0	0	0	0	0	0	0	0	0	0	0	0	0	0.832052	0	0	0	0	0	0	0	0	0	0
hsa-miR-491-5p	4.11866	0.792447	0.97888	1.30716	1.22489	0.843013	0	0	3.89293	5.09761	1.72828	3.42349	1.93474	1.43103	3.57469	3.49014	1.792	5.35309	3.25789	8.5018	2.59302	7.72431	28.004	20.7968	0	0.797309	0.268693	0.257069	0	0.175718	0.439421	0	0	0	6.25929	9.61718	10.1937	15.7903	7.76582	8.31496	12.7705	5.30938	0	0	0.49121	0	0	0	0
hsa-miR-492	0	0	0	0	0	0	0	0	0	0	0	0	0	0	0	0	0	0	0	0	0	0	0	0	0	0	0	0	0	0	0	0	0	0	0	0	0	0	0	0	0	0	0	0	0	0	0	0	0
hsa-miR-493-3p	4.33543	3.03771	4.16024	2.80106	2.38854	6.22224	8.56675	3.04344	4.07485	0	0	0	0	0	0	0	0	173.593	198.731	213.175	76.0618	126.292	9.33467	27.7291	0	0	0	0	0	0	0	0	0	0	10.0149	2.32139	9.46555	4.9864	1.1094	12.8189	3.57574	5.30938	0	0	0.196484	0	0	0	0
hsa-miR-493-5p	8.67086	6.7358	8.93228	7.4695	9.79914	9.59429	3.85504	5.0724	2.47401	0	0	0	0.644913	0.220158	0.428963	0	0.275692	75.7079	97.3293	91.6305	47.5386	74.5396	22.4032	23.7678	0	0	0	0	0.206219	0	0.175768	0	0	0	5.63336	4.9744	11.6499	0	3.60556	7.27559	1.53246	5.64122	0	0	0.392968	0	0	0.229645	0
hsa-miR-494-3p	8.45409	9.11314	12.0525	17.6156	11.5752	2.89033	0	1.52172	5.56653	3.20961	11.3299	9.81401	10.3186	16.732	17.8734	22.9352	30.3262	214.888	199.546	207.507	119.279	195.425	21.7809	107.698	0	0	0	0	0	0	0	0	0	0	0	0.663254	2.18436	4.15533	2.2188	0	2.04328	2.65469	0	0	0	0	0	0	0
hsa-miR-494-5p	0	0	0	0	0	0.441578	0	0	0	0	0	0	0	0	0	0	0	0	2.85065	0	0	3.47594	0	0	0	0	0	0	0	0	0	0	0	0	0	0	0	0	0	0	0	0	0	0	0	0	0	0	0
hsa-miR-495-3p	8.88763	56.5279	70.9688	107.312	74.7797	5.86095	1.71335	3.04344	5.05718	0	0.960158	0	1.28983	1.10079	2.14481	0	2.06769	433.6	596.6	464.45	322.398	452.258	14.9355	14.8549	0	0	0	0	0	0	0	0	0	0	3.12965	1.98976	2.18436	0	2.2188	5.88976	4.08656	1.99102	0	0	0	0	0	0	0
hsa-miR-495-5p	0	1.18867	1.40714	1.36941	1.04116	0	0	0	0	0	0	0	0	0	0	0	0	9.17672	6.92301	10.3911	8.64339	6.56566	15.8689	0	0	0	0	0	0	0	0	0	0	0	0	0	0	0	0	0	0	0	0	0	0	0	0	0	0
hsa-miR-496	0	0.396224	0.48944	0.435721	0.306223	0.562009	0	0	0	0	0	0	0	0	0	0	0	4.58836	5.29406	4.09346	6.91471	5.79323	0	2.22823	0	0	0	0	0	0	0	0	0	0	0	1.65813	0	0	0	0	0	0	0	0	0	0	0	0	0
hsa-miR-497-3p	0	0	0	0	0	3.17133	0	0	69.8545	0	0	0	0	0	0	0	0	10.7062	4.07236	13.5399	6.91471	11.2002	59.4308	0	0	0	0	0	0	0	0	0	0	0	0	0	0	0	0	0	0	0	0	0	0	0	0	0	0
hsa-miR-497-5p	13.2231	109.028	116.425	131.774	105.586	248.649	96.8042	99.4191	270.177	0.566401	0	0	0	0	0	0	0	255.419	310.721	355.186	390.681	439.127	5290.27	5799.34	0	0	0	0	0	0	0	0	0	0	445.036	343.234	519.877	428.83	453.191	443.464	422.448	451.961	0	0	0.392968	0	0	0	0
hsa-miR-498	0	0	0	0	0	0	0	0	0	0	0	0	0	0	0	0	0	0	0	0	0	0	0	0	0	0	0	0	0	0	0	0	0	0	0	0	0	0	0	0	0	0	0	0	0	0	0	0	0
hsa-miR-4999-3p	0	0	0	0	0	0	0	0	0	0	0	0	0	0	0	0	0	2.29418	0	2.20417	0	0	0	0	0	0	0	0	0	0	0	0	0	0	0	0	0	0	0	0	0	0	0	0	0	0	0	0	0
hsa-miR-4999-5p	0	1.0566	0.67298	1.86738	0	0.521865	0.856675	0	0.509356	0.566401	0	0	0	0	0	0	0	3.05891	0	2.51905	0	1.54486	0	0	0	0	0	0	0	0	0	0	0	0	0	1.32651	2.18436	2.4932	1.94145	1.73228	0	0	0	0	0.392968	0	0	0	0
hsa-miR-499a-3p	4.5522	0	0	0	0	0	0	0	1.38254	0	0	0	0	0	0	0	0	4.58836	0	0.944644	0	2.31729	0	0	0	0	0	0	0	0	0	0	0	0	0	0	0	0	0	0	0	0	0	0	0	0	0	0	0
hsa-miR-499a-5p	4765.5	31.0375	17.8646	24.0891	16.6585	1.8466	3.85504	4.56516	4.69335	0	0	0	0	0	0	0	0	86.4141	93.6642	75.8864	82.1122	116.251	5.91196	3.46613	0	0	0	0	0	0	0	0	0	0	14.3964	11.6069	8.73743	9.9728	22.188	11.4331	19.4112	11.6143	0	0	0	0	0	0	0
hsa-miR-499b-3p	189.458	0	0	0	0	0	0	0	0	0	0	0	0	0	0	0	0	0	0	0	0	0	0	0	0	0	0	0	0	0	0	0	0	0	0	0	0	0	0	0	0	0	0	0	0	0	0	0	0
hsa-miR-499b-5p	0	0.198112	0	0	0	0	0	0	0	0	0	0	0	0	0	0	0	0	0	0	0	0	0	0	0	0	0	0	0	0	0	0	0	0	0	0	0	0	0	0	0	0	0	0	0	0	0	0	0
hsa-miR-5000-3p	0	0	0	0	0	1.16416	2.14169	0	0.691269	0	0	0	0.322456	0	0	0	0	0	0	0	0	0	0	0	0.68802	0.455605	0.268693	0.685518	0.206219	0.439295	0.263652	0.295224	0.325823	0.728639	8.13708	5.30603	0	0	3.60556	5.19685	9.70558	2.65469	0	0	0	0	0	0	0
hsa-miR-5000-5p	0	0	0	0	0	0.602152	0	0	0	0	0	0	0	0	0	0	0	0	0	1.57441	0	0	0	0	0	0	0	0	0	0	0	0	0	0	0	0	0	0	0	0	0	0	0	0	0	0	0	0	0
hsa-miR-5001-3p	1.30063	0	0	0	0	0	0	0	1.27339	4.72001	5.56892	4.79289	8.06141	6.16442	6.8634	7.97747	8.82216	0	0	3.4637	0	0	0	0	2.63741	2.84753	3.08997	1.11397	1.34042	1.58146	2.28499	1.77134	0.977469	2.33164	7.51115	3.31627	6.55307	0	4.43761	6.92913	4.59738	2.98653	0	0	0.589452	0	0.412059	0.229645	0
hsa-miR-5001-5p	0	0	0	0	0.306223	0	0	0	1.01871	0	0	0	0	0	0	0	0	0	0	0	0	0	0	0	0	0	0	0	0	0	0	0	0	0	0	0	0	0	0	0	0	0	0	0	0	0	0	0	0
hsa-miR-5002-3p	0	0	0	0	0	0	0	0	0	0	0	0	0	0	0	0	0	0	0	0	0	0	21.7809	0	0	0	0	0	0	0	0	0	0	0	0	0	0	0	0	0	0	0	0	0	0	0	0	0	0
hsa-miR-5002-5p	4.5522	0	0.36708	0	0	8.99214	0	0	0	0	0	0	0	0	0	0	0	0	0	0	0	0	0	0	0	0	0	0	0	0	0	0	0	0	0	0	0	0	0	0	0	0	0	0	0	0	0	0	0
hsa-miR-5003-3p	0	0	0.18354	0	0	0	0	0	0	0	0	0	0	0	0	0	0	0	0	0	0	0	0	0	0	0	0	0	0	0	0	0	0	0	0	0	0	0	0	0	0	0	0	0	0	0	0	0	0
hsa-miR-5003-5p	0	0	0	0	0	0	0	0	0	0	0	0	0	0	0	0	0	0	0	0	0	0	0	0	0	0	0	0	0	0	0	0	0	0	0	0	0	0	0	0	0	0	0	0	0	0	0	0	0
hsa-miR-5004-3p	0	0	0	0	0	0	0	0	0	0	0	0	0	0	0	0	0	0	0	0	0	0	0	0	0	0	0	0	0	0	0	0	0	0	0	0	0	0	0	0	0	0	0	0	0	0	0	0	0
hsa-miR-5004-5p	0	0.198112	0.24472	0.311229	0.244978	0	0	0	0	0	0	0	0	0	0	0	0	0	0	0	0	0	0	0	0	0	0	0	0	0	0	0	0	0	0	0	0	0	0	0	0	0	0	0	0	0	0	0	0
hsa-miR-5006-3p	0	0	0	0	0	0	0	0	0.509356	2.26561	0	0	0	0	0	0	1.24062	0	0	0	0	0	0	0	0	0.797309	0.537386	0	0	0.702872	0.966725	0	0	1.45728	0	0	3.64059	8.31067	0	0	5.1082	3.98204	0	0	0	0	0	0	0
hsa-miR-5006-5p	0	0	0	0	0	0	0	0	0	0	0	0	0	0	0	0	0	0	0	0	0	0	0	0	0	0	0	0	0	0	0	0	0	0	0	0	0	0	0	0	0	0	0	0	0	0	0	0	0
hsa-miR-5007-3p	0	0	0	0	0	0	0	0	0	0	0	0	0	0	0	0	0	0	0	0	0	0	0	0	0	0	0	0	0	0	0	0	0	0	0	0	0	0	0	0	0	0	0	0	0	0	0	0	0
hsa-miR-5007-5p	0	0	0	0	0	0	0	0	0	0	0	0	0	0	0	0	0	0	0	0	0	0	0	0	0	0	0	0	0	0	0	0	0	0	0	0	0	0	0	0	0	0	0	0	0	0	0	0	0
hsa-miR-5008-3p	0	0	0	0	0	1.12402	0	0	0	0	0	0	0	0	0	0	0	0	0	0	0	0	0	0	0	0	0	0	0	0	0	0	0	0	0	0	0	0	0	0	0	0	0	0	0	0	0	0	0
hsa-miR-5008-5p	0	0	0	0	0	0	0	0	0.363826	0	0	0	0	0	0	0	0	0	0	0	0	0	0	0	0	0	0	0	0	0	0	0	0	0	0	0	0	0	0	0	0	0	0	0	0	0	0	0	0
hsa-miR-5009-3p	0	0	0	0	0	0	0	0	0	0	0	0	0	0	0	0	0	0	0	0	0	0	0	0	0	0	0	0	0	0	0	0	0	0	0	0	0	0	0	0	0	0	0	0	0	0	0	0	0
hsa-miR-5009-5p	0	0.264149	0.3059	0.373475	0.183734	0	0	0	0	0.377601	0.768126	0	0	0	0	0	0	0	0	0	0	0	0	0	0	0	0	0.257069	0	0	0.439421	0	0.488734	0	0	0	0	0	0	0	0	0	0.179504	0	0	0	0	0.344467	0
hsa-miR-500a-3p	30.9983	8.51881	7.15806	9.83485	5.32828	151.461	313.115	333.257	43.9865	80.0514	109.266	89.0108	80.1304	38.4175	88.3663	64.3183	101.455	35.1774	51.7189	88.4817	46.6743	50.5942	122.907	128.495	23.0487	22.6664	24.7198	20.8226	24.1276	20.8226	22.1468	19.0419	19.2236	18.9446	179.016	211.91	181.302	186.99	212.451	189.858	223.228	222.33	2.42331	1.40241	14.0486	19.2372	17.7185	2.52609	4.21663
hsa-miR-500a-5p	1.73417	0.594335	0.18354	0.373475	0	3.01076	0.856675	0	16.6996	27.7537	20.9314	26.9315	20.6372	7.15513	19.8753	17.4507	19.1606	76.4727	113.212	197.746	83.8408	128.61	60.3642	11.3887	0.57335	0.91121	0.537386	0.685518	0.206219	0.439295	0.263652	0	0.488734	0.291456	6.25929	5.63766	0	9.14173	5.26966	7.62204	11.7489	3.6502	0	0	0.49121	0	0.412059	0	0
hsa-miR-500b-3p	0	0	0	0	0	0	0	0	1.05509	0	0	0	2.09597	1.32095	2.00183	0	0	0	0	2.20417	0	0	0	0	0	0	0	0	0	0	0	0	0	0	0	2.32139	0	0	0	0	0	0	0	0	0	0	0	0	0
hsa-miR-500b-5p	0.867086	0.330186	0.12236	0.124492	0.306223	1.48531	0.856675	1.52172	3.78379	7.55202	7.48923	7.98815	4.35316	1.87134	3.71768	5.48451	4.41108	31.3538	50.09	93.2049	38.0309	41.7113	26.7594	11.3887	0	0	0	0	0	0.175718	0	0	0	0	1.87779	1.65813	3.64059	0	0.832052	2.4252	0	1.65918	0	0	0.294726	0.5658	0.412059	0	0
hsa-miR-5010-3p	7.37023	0	0.18354	0	0.367468	4.01435	0	0	2.65593	69.6674	98.1281	97.4554	59.6544	45.2424	94.5148	63.3211	66.304	0	0	7.87203	5.18603	3.86216	10.5793	0	20.0672	21.869	15.5842	26.6495	27.7364	23.7219	21.0922	20.3704	21.6672	22.8793	7.51115	3.64789	9.46555	8.31067	6.10171	7.62204	11.238	3.6502	2.0643	0	5.40331	3.1119	1.64824	3.67431	2.05689
hsa-miR-5010-5p	0	10.0377	12.5419	6.41132	13.78	0.521865	0	0	0	0	0	0	0	0	0	0	0.413539	0	0	0	0	0	0	1.98065	0	0	0	0	0	0	0	0	0	0	0	0	0	0	0	0	0	0	0.538513	0	0.589452	1.4145	0.618089	1.14822	1.23414
hsa-miR-5011-3p	0	0	0	0	0	0	0	0	0	0	0	0	0	0	0	0	0	0	0	0	0	0	0	0	0	0	0	0	0	0	0	0	0	0	0	0	0	0	0	0	0	0	0	0	0	0	0	0	0
hsa-miR-5011-5p	0	0	0	0	0	0	0	0	0	0	0	0	0	0	0	0	0	0	0	0	0	0	0	0	0	0	0	0	0	0	0	0	0	0	0	0	0	0	0	0	0	0	0	0	0	0	0	0	0
hsa-miR-501-3p	32.7325	3.76412	2.63074	5.04191	2.02107	14.5721	262.999	271.881	7.53119	299.815	408.259	289.171	355.669	338.603	322.723	273.727	441.384	22.9418	26.0631	51.0108	13.8294	30.511	91.1687	119.582	7.22421	7.28968	7.25472	5.91259	5.15547	7.90731	8.08534	7.67582	8.14557	6.41202	103.278	129.998	107.033	88.9241	93.7445	98.3937	112.38	95.2371	5.29537	0.818073	34.8759	28.8558	22.6632	4.36325	3.39387
hsa-miR-501-5p	3.90189	0.528298	0.42826	0.435721	0.489957	18.9879	0	0	11.6424	41.7249	41.8629	116.399	37.8886	33.2438	29.0265	10.969	17.2308	39.0011	33.8006	51.6405	42.3526	27.0351	23.959	35.6517	0.57335	1.02511	0.80608	0.342759	0.515547	0.527154	0.439421	0.295224	0.488734	0.437183	9.38894	9.61718	10.9218	14.9592	9.70727	9.35433	14.303	7.3004	0.538513	0	1.37539	0.5658	1.44221	0.574112	0.822757
hsa-miR-502-3p	49.6407	12.481	10.523	13.7563	7.65558	27.6187	19.7035	20.7968	57.1206	99.309	132.31	96.086	104.798	37.7571	109.528	108.693	154.801	104.003	105.067	237.421	82.9765	128.61	191.672	215.643	6.42152	4.44215	4.29909	2.485	4.84614	4.83224	3.77902	4.42836	4.07279	4.51756	60.7151	56.3766	56.0652	50.6951	67.9509	49.1968	66.4066	58.4032	0.987273	0.350603	3.83144	2.2632	2.67838	0.803756	1.02845
hsa-miR-502-5p	1.30063	0.264149	0.48944	0.311229	0.489957	4.01435	0.856675	1.01448	2.54678	0.944002	1.53625	0.912931	1.77351	0.880631	2.14481	0	1.92985	20.6476	18.7328	31.803	31.1162	22.4005	4.97849	4.95162	0.22934	0.341704	0.268693	0.257069	0	0	0.263652	0	0	0	6.88522	4.64277	10.1937	7.4796	3.05086	4.15748	5.61902	3.31837	0	0	0	0	0	0	0
hsa-miR-503-3p	0	0	0	0	0	0	0	0	0.291061	0	0	0	0	0	0	0	0	0	0	0.944644	0	0	0.933467	0	0	0	0	0	0	0	0	0	0	0	0	1.32651	0	0	0	1.38583	0	0.99551	0	0	0	0	0	0	0
hsa-miR-503-5p	12.5727	74.424	70.1734	64.6734	69.6964	1.48531	4.28337	0	10.8784	30.3969	33.0294	18.7151	13.3819	8.69623	30.3134	25.4282	32.5317	32.8832	55.3841	102.651	38.0309	50.5942	43.5618	26.7387	0	0	0.80608	0	0	0	0	0	0	0	9.38894	10.9437	8.00931	4.15533	13.0355	11.7795	14.8138	15.2645	0.448761	0	1.27715	0	0	0	0
hsa-miR-504-3p	0	1.18867	0.97888	0.809196	1.04116	0	0	0	0	0	0	0	0	0	0	0	0	0	0	0	0	0	0	0	0	0	0	0	0	0	0	0	0	0	0	0	0	0	0	0	0	0	0	0	0	0	0	0	0
hsa-miR-504-5p	33.3828	7.72636	5.5062	4.66844	3.12347	8.3097	0	1.01448	5.53015	0.755202	0.960158	0.912931	0	0	0.857926	1.99437	0.413539	0	0	2.20417	0	0	24.5813	18.8162	0	0	0	0	0	0	0	0	0	0	10.6408	7.95904	10.1937	9.14173	4.43761	10.7402	9.19476	10.9506	0	0	0.294726	0	0	0	0
hsa-miR-5047	0	0	0	0	0	0	0	0	0	0	0	0	0	0	0	0	0	0	0	0	0	0	0	0	0	0	0	0	0	0	0	0	0	0	0	0	0	0	0	0	0	0	0	0	0	0	0	0	0
hsa-miR-505-3p	9.32117	3.03771	5.01676	5.60213	2.8785	24.0058	46.2604	45.1444	16.7724	12.8384	12.6741	16.8892	17.5739	18.4933	18.0164	40.3859	20.8148	62.7076	87.9629	90.6858	57.9107	61.7945	78.7224	80.4638	1.26137	1.25291	1.61216	0.942588	0.721766	1.05431	0.527305	0.73806	0.488734	1.45728	21.9075	33.4943	58.2495	54.0193	33.0047	38.4567	49.0387	31.8563	1.52579	0.350603	5.50155	3.1119	3.09044	3.21502	0.617068
hsa-miR-505-5p	1.73417	8.65088	8.2593	5.41539	8.513	1.16416	1.71335	1.52172	1.16424	2.83201	2.11235	2.73879	1.61228	1.65118	3.28871	6.48169	6.75446	3.82363	2.03618	4.40834	3.45735	1.54486	3.42271	14.8549	0	0.227803	0	0.17138	0	0	0.175768	0	0	0.582911	3.75557	0.99488	0	1.66213	2.49616	3.11811	5.1082	2.32286	0.538513	0	0.687694	0	0.618089	0.803756	1.13129
hsa-miR-506-3p	0	0	0	0	0	0	0.856675	0	9.85968	0	0	0	0	0	0	0	0	0	0	0	0	0.772431	9.64583	13.3694	0	0	0	0	0	0	0	0	0	0	0	0	0	0	0	0	0	0	0	0	0	0	0	0	0
hsa-miR-506-5p	0	0	0	0	0	0	0	0	0	0	0	0	0	0	0	0	0	0	0	0	0	0	0	0	0	0	0	0	0	0	0	0	0	0	0	0	0	0	0	0	0	0	0	0	0	0	0	0	0
hsa-miR-507	0	0	0	0	0	0	0	0	2.83784	0	0	0	0	0	0	0	0	0	0	0	0	0	2.48925	4.95162	0	0	0	0	0	0	0	0	0	0	0	0	0	0	0	0	3.06492	0	0	0	0	0	0	0	0
hsa-miR-508-3p	0	0.132075	0.12236	0	0	0	0	0	56.6477	0	0	0	0	0	0	0	0	0	0	2.20417	0	0	23.6478	9.40808	0	0	0	0	0	0	0	0	0	0	0	2.32139	0	0	1.6641	4.85039	3.06492	3.98204	0	0	0	0	0	0	0
hsa-miR-508-5p	0	0	0	0	0	0	0	0	0.545739	0	0	0	0	0	0	0	0	0	0	0	0	0	5.28965	3.21855	0	0	0	0	0	0	0	0	0	0	0	0	0	0	0	0	0	0	0	0	0	0	0	0	0
hsa-miR-5087	0	0	0	0	0	0	0	0	0	0	0	0	0	0	0	0	0	0	0	0	0	0	0	0	0	0	0	0	0	0	0	0	0	0	0	0	0	0	0	0	0	0	0	0	0	0	0	0	0
hsa-miR-5088-3p	0	0	0	0	0	0	0	0	0	0	0	0	0	0	0	0	0	0	0	0	0	0	0	0	0	0	0	0	0	0	0	0	0	0	0	0	0	0	0	0	0	0	0	0	0	0	0	0	0
hsa-miR-5088-5p	0	0	0.18354	0	0	0	0	0	0	0	0	0	0	0	0	0	0	0	0	0	0	0	0	0	0	0	0	0	0	0	0	0	0	0	0	0	0	0	0	0	0	0	0	0	0	0	0	0	0
hsa-miR-5089-3p	0	0	0	0	0	0	0	0	0	0	0	0	0	0	0	0	0	0	0	0	0	0	0	5.44678	0	0	0	0	0	0	0	0	0	0	0	0	0	0	0	0	0	0	0	0	0	0	0	0	0
hsa-miR-5089-5p	0	0	0	0	0	0	0	0	0	0	0	0	0	0	0	0	0	0	0	0	0	0	0	12.6266	0	0	0	0	0	0	0	0	0	0	0	0	0	0	0	0	0	0	0	0	0	0	0	0	0
hsa-miR-5090	0	0.660373	1.16242	0.497967	0.673691	0	0	0	0	0	0	0	0	0	0	0	0	0	0	0	0	0	0	0	0	0	0	0	0	0	0	0	0	0	0	0	0	0	0	0	0	0	0	0	0	0	0.412059	0.344467	0.308534
hsa-miR-5091	0	0	0.12236	0	0	1.04373	1.28501	0	0.327443	0	0	0	0	0	0	0	0	0	0	0	0	3.08972	0	0	0	0	0	0	0	0	0	0	0	0	0	1.32651	4.36871	0	2.2188	3.81102	0	3.31837	0	0	0	0	0	0	0
hsa-miR-5092	0	0	0	0	0	0.722582	0	2.02896	0	0	0	0	0	0	0	0	0	0	0.814472	0	0	0	0	0	0	0	0	0	0	0	0	0	0	0	3.12965	0	0	0	1.6641	0	0	0	0	0	0	0	0	0	0
hsa-miR-5093	0	0	0	0	0	0	0	0	0	0	0	0	0	0	0	0	0	0	0	0	0	0	0	0	0	0	0	0	0	0	0	0	0	0	0	0	0	0	0	0	0	0	0	0	0	0	0	0	0
hsa-miR-509-3-5p	0	0	0	0	0	0	0	0	0.254678	0	0	0	0	0	0	0	0	0	0	0	0	0	0	0	0	0	0	0	0	0	0	0	0	0	0	0	0	0	0	0	0	0	0	0	0	0	0	0	0
hsa-miR-509-3p	0	0	0.24472	0	0	0.802869	0	0	6.76716	0	0	0	0	0	0	0	0	0	1.22171	0	0	0	22.0921	19.8065	0	0	0	0	0	0	0	0	0	0	0	3.97952	0	6.64853	1.38675	1.03937	4.08656	5.97306	0	0	0.589452	0	0.824118	0.229645	0.411379
hsa-miR-5094	0	0	0	0	0	0	0	0	0	0.944002	1.15219	1.3694	2.41842	1.87134	2.14481	0	1.92985	0	0	0	0	0	0	0	0	0.341704	0	0	0.206219	0.263577	0.263652	0	0	0	0	1.32651	0	0	0	0	0	0	0	0	0	0	0	0	0
hsa-miR-5095	0	0	0	0	0	1.12402	0	0	0	0	0	0	0	0	0	0	0	0	0	0	17.2868	0	0	0	0	0	0	0	0	0	0	0	0	0	0	0	0	0	0	0	3.06492	0	0	0	0	0	0	0	0
hsa-miR-509-5p	0	0.198112	0.12236	0.124492	0.183734	0	0	0	0.836799	0	0	0	0	0	0	0	0	0	2.03618	2.20417	0	0	3.73387	14.6073	0	0	0	0	0	0	0	0	0	0	0	0	0	0	0	4.85039	0	0.99551	0	0	0	0	0	0	0
hsa-miR-5096	0	1.0566	0	0.871442	0	5.45951	0	0	0.909564	0	0	0	0	0	0	0	0	22.1771	9.36642	9.76132	41.4883	12.3589	12.1351	45.8025	0	0	0	0	0	0	0	0	0	0	25.0372	2.65301	17.4749	14.9592	4.16026	12.126	25.541	5.30938	0	0	0	0	0	0	0
hsa-miR-5100	0	0	0	0	0	29.2646	0	0	0	0	0	0	0	0	0	0	0	2969.43	685.785	0	0	0	0	61.6477	0	0	0	0	0	0	0	0	0	0	0	0	0	0	0	0	19.922	0	0	0	0	0	0	0	0
hsa-miR-510-3p	0	0	0	0	0	0	0	0	0	0	0	0	0	0	0	0	0	0	0	0	0	0	0	138.15	0	0	0	0	0	0	0	0	0	0	0	0	0	0	0	0	0	0	0	0	0	0	0	0	0
hsa-miR-510-5p	0	0	0	0	0	0	0	0	0.436591	0	0	0	0	0	0	0	0	0	0	0	0	0	0	0	0	0	0	0	0	0	0	0	0	0	0	0	0	0	0	0	0	0	0	0	0	0	0	0	0
hsa-miR-511-3p	0.650314	13.7358	8.68756	14.0053	8.513	2.40861	2.57002	1.52172	631.274	0	0	0	0	0	0	0	0	8.41199	9.77366	6.61251	14.6938	10.814	8.40121	12.6266	0	0	0	0	0	0	0	0	0	0	5.00743	2.32139	4.36871	2.4932	2.2188	0	5.61902	2.98653	0	0	0	0	0	0	0
hsa-miR-511-5p	1.30063	0.264149	0.12236	0	0	3.21148	4.28337	9.63756	14.3711	0	0	0	0	0	0	0	0	3.05891	13.4388	14.1697	11.2364	12.3589	27.0706	49.021	0	0	0	0	0	0	0	0	0	0	9.38894	5.63766	11.6499	9.14173	3.88291	8.66141	0	6.96857	0	0	0	0	0	0	0
hsa-miR-512-3p	3.25157	0	0	0	0	0	0	0	0.800417	0	0	0	0	0	0	0	0	0	0	0	0	0	0	0	0	0	0	0	0	0	0	0	0	0	0	0	0	0	0	0	0	0	0	0	0	0	0	0	0
hsa-miR-512-5p	0	0	0	0	0	0	0	0	0	0	0	0	0	0	0	0	0	0	0	0	0	0	0	0	0	0	0	0	0	0	0	0	0	0	0	0	0	0	0	0	0	0	0	0	0	0	0	0	0
hsa-miR-513a-3p	0	0	0	0	0	0	0	0	1.01871	0	0	0	0	0	0	0	0	0	0	0	0	0	5.6008	0	0	0	0	0	0	0	0	0	0	0	0	0	0	0	0	0	0	0	0	0	0	0	0	0	0
hsa-miR-513a-5p	0	0	0	0	0	0	0	0	0.472973	0	0	0	0	0	0	0	0	0	0	0	0	0	0	2.72339	0	0	0	0	0	0	0	0	0	0	0	0	0	0	0	0	0	0	0	0	0	0	0	0	0
hsa-miR-513b-3p	0	0	0	0	0	0	0	0	0	0	0	0	0	0	0	0	0	0	0	0	0	0	0	0	0	0	0	0	0	0	0	0	0	0	0	0	0	0	0	0	0	0	0	0	0	0	0	0	0
hsa-miR-513b-5p	0	0	0	0	0	0	0	0	0.509356	0	0	0	0	0	0	0	0	0	0	0	0	0	2.8004	2.97097	0	0	0	0	0	0	0	0	0	0	0	0	0	0	0	0	0	0	0	0	0	0	0	0	0
hsa-miR-513c-3p	0	0	0	0	0	0	0	0	0.691269	0	0	0	0	0	0	0	0	0	0	0	0	0	0	0	0	0	0	0	0	0	0	0	0	0	0	0	0	0	0	0	0	0	0	0	0	0	0	0	0
hsa-miR-513c-5p	0	0	0	0	0	0.401435	0	0	1.41892	0	0	0	0	0	0	0	0	0	0	0	0	0	4.66734	6.18952	0	0	0	0	0	0	0	0	0	0	0	0	0	0	0	0	0	0	0	0	0	0	0	0	0
hsa-miR-514a-3p	0	0	0	0	0	0	0	0	140.982	0	0	0	0	0	0	0	0	5.35309	3.25789	1.57441	0	2.70351	21.7809	19.3113	0	0	0	0	0	0	0	0	0	0	0	0	4.36871	0	2.49616	2.4252	0	2.65469	0	0	0	0	0	0	0
hsa-miR-514a-5p	0	0	0	0	0	0	0	0	0.764034	0	0	0	0	0	0	0	0	0	0	0	0	0	1.86693	5.69436	0	0	0	0	0	0	0	0	0	0	0	0	0	0	0	0	0	0	0	0	0	0	0	0	0
hsa-miR-514b-3p	0	0	0	0	0	0	0	0	0.873182	0	0	0	0	0	0	0	0	0	0	0	0	0	0	0	0	0	0	0	0	0	0	0	0	0	0	0	0	0	0	0	0	0	0	0	0	0	0	0	0
hsa-miR-514b-5p	0	0	0	0	0	0	0	0	0.582121	0	0	0	0	0	0	0	0	0	0	0	0	0	2.17809	2.22823	0	0	0	0	0	0	0	0	0	0	0	0	0	0	0	0	0	0	0	0	0	0	0	0	0
hsa-miR-515-3p	0	0	0	0	0	0	0	0	0	0	0	0	0	0	0	0	0	0	0	0	0	0	0	0	0	0	0	0	0	0	0	0	0	0	0	0	0	0	0	0	0	0	0	0	0	0	0	0	0
hsa-miR-515-5p	0	0	0	0	0	0	0	0	0.654886	0	0	0	0	0	0	0	0	0	2.85065	0	0	0	0	0	0	0	0	0	0	0	0	0	0	0	0	0	0	0	0	0	0	0	0	0	0	0	0	0	0
hsa-miR-516a-3p	0	0	0	0	0	0	0	0	0	0	0	0	0	0	0	0	0	0	0	0	0	0	0	0	0	0	0	0	0	0	0	0	0	0	0	0	0	0	0	0	0	0	0	0	0	0	0	0	0
hsa-miR-516a-5p	1.5174	0	0	0	0	0	0	0	7.45843	0	0	0	0	0	0	0	0	0	0	0	0	0	0	0	0	0	0	0	0	0	0	0	0	0	0	0	0	0	0	0	0	0	0	0	0	0	0	0	0
hsa-miR-516b-3p	0	0	0	0	0	0	0	0	0	0	0	0	0	0	0	0	0	0	0	0	0	0	0	0	0	0	0	0	0	0	0	0	0	0	0	0	0	0	0	0	0	0	0	0	0	0	0	0	0
hsa-miR-516b-5p	3.0348	0	0.18354	0.124492	0.183734	0	0	0	3.85655	0	0	0	0	0	0	0	0	0	0	0	0	0	0	0	0	0	0	0	0	0	0	0	0	0	0	0	0	0	0	0	0	0	0	0	0	0	0	0	0
hsa-miR-517-5p	0	0	0	0	0	0	0	0	0	0	0	0	0	0	0	0	0	0	0	0	0	0	0	0	0	0	0	0	0	0	0	0	0	0	0	0	0	0	0	0	0	0	0	0	0	0	0	0	0
hsa-miR-517a-3p	0	0	0	0	0	0	0	0	0.181913	0	0	0	0	0	0	0	0	0	0	0	0	0	0	0	0	0	0	0	0	0	0	0	0	0	0	0	0	0	0	0	0	0	0	0	0	0	0	0	0
hsa-miR-517b-3p	2.38449	0.198112	0	0	0.122489	0	0	0	0.654886	0	0	0	0.322456	0	0	0	0	0	0	0	0	0	3.11156	0	0	0	0	0	0	0	0	0	0	0	0	0	0	0	0	0	0	0	0	0	0	0	0	0	0
hsa-miR-517c-3p	0	0	0	0	0	0	0	0	0.727651	0	0	0	0	0	0	0	0	0	0	0	0	0	0	0	0	0	0	0	0	0	0	0	0	0	0	0	0	0	0	0	0	0	0	0	0	0	0	0	0
hsa-miR-5186	0	0	0.24472	0	0	0	0	0	0	0	0	0	0	0	0	0	0	0	0	0	0	0	0	0	0	0	0	0	0	0	0	0	0	0	0	0	0	0	0	0	0	0	0	0	0	0	0	0	0
hsa-miR-5187-3p	0	0	0	0	0	0.9233	0	0	0	0.377601	0	0	0	0	0	0	0	0	0	0	0	0	0	0	0	0	0	0	0	0	0	0	0	0	0	0	0	3.32427	0	0	0	0	0	0	0	0	0	0	0
hsa-miR-5187-5p	0	3.10375	3.9767	4.04598	3.9809	0	0	0	1.20062	0	0	0	0	0	0	0	0	0	0	0	0	0	0	4.20888	0	0	0	0	0	0	0	0	0	0	4.3815	0	0	0	0	0	0	0	0	0	0	0	0	0	0
hsa-miR-5188	0	0.396224	0.6118	0.560213	0.306223	0	0	0	0.472973	1.3216	0.768126	0	0.322456	0.330237	0.714938	0	0.689231	0	0	0	0	0	0	0	0.45868	0	0	0	0	0.263577	0.263652	0.590448	0.325823	0.437183	4.3815	0.99488	0	0	0	0	0	0.663673	0	0	0	0	0	0	0
hsa-miR-5189-3p	0	0	0	0	0	0	0	0	0	3.02081	1.15219	2.28233	3.54702	0	2.00183	7.97747	2.89477	0	0	0	0	0	0	0	0.45868	0.569506	0.537386	0.428449	0.618657	0.439295	0.439421	0	0	0.728639	0	0	0	0	0	4.15748	0	0	0	0	0	0	0	0.229645	1.8512
hsa-miR-5189-5p	0	0.330186	0.79534	0	0.979914	0	0	0	0	0	0	0	0.322456	0	0	0	0	0	0	0	0	0	0	0	0	0.797309	0.40304	0	0.309328	0.615013	0.263652	0	0	0.291456	0	0	0	0	0	3.81102	0	2.65469	7.71868	2.33735	5.79628	2.2632	7.005	8.49685	21.5974
hsa-miR-518a-3p	0	0	0	0	0	0	0	0	1.16424	0	0	0	0	0	0	0	0	0	0	0	0	0	0	0	0	0	0	0	0	0	0	0	0	0	0	0	0	0	0	0	0	0	0	0	0	0	0	0	0
hsa-miR-518a-5p	0	0	0	0	0	0	0	0	0	0	0	0	0	0	0	0	0	0	0	0	0	0	0	0	0	0	0	0	0	0	0	0	0	0	0	0	0	0	0	0	0	0	0	0	0	0	0	0	0
hsa-miR-518b	0	0	0	0	0	0.401435	0	0	0.363826	0	0	0	0	0	0	0	0	0	0	0	0	0	0	0	0	0	0	0	0	0	0	0	0	0	0	1.32651	0	0	0	0	0	0	0	0	0	0	0	0	0
hsa-miR-518c-3p	0	0	0	0	0	0	0	0	3.56549	0	0	0	0	0	0	0	0	0	0	0	0	0	0	0	0	0	0	0	0	0	0	0	0	0	0	0	0	0	0	0	0	0	0	0	0	0	0	0	0
hsa-miR-518c-5p	0	0	0	0	0	0	0	0	0	0	0	0	0	0	0	0	0	0	0	0	0	0	0	0	0	0	0	0	0	0	0	0	0	0	0	0	0	0	0	0	0	0	0	0	0	0	0	0	0
hsa-miR-518d-3p	0	0	0	0	0	0	0	0	0.618504	0	0	0	0	0	0	0	0	0	0	0	0	0	0	0	0	0	0	0	0	0	0	0	0	0	0	0	0	0	0	0	0	0	0	0	0	0	0	0	0
hsa-miR-518d-5p	0	0	0	0	0	0	0	0	0	0	0	0	0	0	0	0	0	0	0	0	0	0	0	0	0	0	0	0	0	0	0	0	0	0	0	0	0	0	0	0	0	0	0	0	0	0	0	0	0
hsa-miR-518e-3p	0	0	0	0	0	0	0	0	1.41892	0	0	0	0	0	0	0	0	0	0	0	0	0	0	0	0	0	0	0	0	0	0	0	0	0	0	0	0	0	0	0	0	0	0	0	0	0	0	0	0
hsa-miR-518e-5p	0	0	0	0	0	0	0	0	0.291061	0	0	0	0	0	0	0	0	0	0	0	0	0	0	0	0	0	0	0	0	0	0	0	0	0	0	0	0	0	0	0	0	0	0	0	0	0	0	0	0
hsa-miR-518f-3p	0	0	0	0	0	0	0	0	0.400208	0	0	0	0	0	0	0	0	0	0	0	0	0	0	0	0	0	0	0	0	0	0	0	0	0	0	0	0	0	0	0	0	0	0	0	0	0	0	0	0
hsa-miR-518f-5p	0	0	0	0	0	0	0	0	0	0	0	0	0	0	0	0	0	0	0	0	0	0	0	0	0	0	0	0	0	0	0	0	0	0	0	0	0	0	0	0	0	0	0	0	0	0	0	0	0
hsa-miR-5190	0	0	0	0	0	0	0	0	0	0	0	0	0	0	0	0	0	0	0	0	0	0	0	0	0	0	0	0	0	0	0	0	0	0	0	0	0	0	0	0	0	0	0	0	0	0	0	0	0
hsa-miR-5191	0	0	0	0	0	0	0	0	0	0	0	0	0	0	0	0	0	0	0	0	0	0	0	0	0	0	0	0	0	0	0	0	0	0	0	0	0	0	0	0	0	0	0	0	0	0	0	0	0
hsa-miR-5192	0	0	0	0	0	0	0	0	0	0	0	0	0	0	0	0	0	0	0	0	0	0	0	0	0	0	0	0	0	0	0	0	0	0	0	0	0	0	0	0	0	0	0	0	0	0	0	0	0
hsa-miR-5193	0	0	0.42826	0	0	0	1.28501	0	0.764034	1.1328	1.34422	0	1.1286	1.10079	1.42988	0	1.24062	0	0	1.57441	0	0	0	0	0	0	0	0	0	0	0	0	0	0	0	0	0	3.32427	0	2.77165	0	0	0	0	0	0	0	0	0
hsa-miR-5194	0	0	0	0	0	0	0	0	0	0	0	0	0	0	0	0	0	0	0	0	0	0	0	0	0	0	0	0	0	0	0	0	0	0	0	0	0	0	0	0	0	0	0	0	0	0	0	0	0
hsa-miR-5195-3p	0	0	0	0	0	0	0	0	0	0	0	0	0	0	0	0	0	0	0	0	0	0	0	0	0	0	0	0	0	0	0	0	0	0	0	0	0	0	0	0	0	0	0	0	0	0	0	0	0
hsa-miR-5195-5p	0	0	0	0	0	0	0	0	0	0	0	0	0	0	0	0	0	0	0	0	0	0	0	0	0	0	0	0	0	0	0	0	0	0	0	0	0	0	0	0	0	0	0	0	0	0	0	0	0
hsa-miR-5196-3p	0	0	0	0	0	0	0	0	0	0	0	0	0	0	0	0	0	0	0	0	0	0	0	0	0	0	0	0	0	0	0	0	0	0	0	2.32139	0	0	1.6641	0	0	0	0	0	0	0	0	0	0
hsa-miR-5196-5p	0	0	0	0	0	0	0	0	0	0	0	0	0	0	0	0	0	0	0	0	0	0	0	0	0	0	0	0	0	0	0	0	0	0	0	0	0	0	0	0	0	0	0	0	0	0	0	0	0
hsa-miR-5197-3p	0	0	0	0	0	0	0	0	0	0	0	0	0	0	0	0	0	0	0	0	0	0	0	0	0	0	0	0	0	0	0	0	0	0	0	0	0	0	0	0	0	0	0	0	0	0	0	0	0
hsa-miR-5197-5p	0	0	0	0	0	0	0	0	0	0	0	0	0	0	0	0	0	0	0	0	0	0	0	0	0	0	0	0	0	0	0	0	0	0	0	0	0	0	0	0	0	0	0	0	0	0	0	0	0
hsa-miR-519a-3p	0	0	0	0	0	0	0	0	10.9512	0	0	0	0	0	0	0	0	0	0	0	0	0	0	0	0	0	0	0	0	0	0	0	0	0	0	0	0	0	0	0	0	0	0	0	0	0	0	0	0
hsa-miR-519a-5p	0	0	0	0	0	0	0	0	0	0	0	0	0	0	0	0	0	0	0	0	0	0	0	0	0	0	0	0	0	0	0	0	0	0	0	0	0	0	0	0	0	0	0	0	0	0	0	0	0
hsa-miR-519b-3p	0	0	0	0	0	0	0	0	0.218295	0	0	0	0	0	0	0	0	0	0	0	0	0	0	0	0	0	0	0	0	0	0	0	0	0	0	0	0	0	0	0	0	0	0	0	0	0	0	0	0
hsa-miR-519b-5p	0	0	0	0	0	0	0	0	0	0	0	0	0	0	0	0	0	0	0	0	0	0	0	0	0	0	0	0	0	0	0	0	0	0	0	0	0	0	0	0	0	0	0	0	0	0	0	0	0
hsa-miR-519c-3p	0	0	0	0	0	0.361291	0	0	5.31186	0	0	0	0	0	0	0	0	0	0	0	0	0	0.933467	0	0	0	0	0	0	0	0	0	0	0	0	0	0	0	0	0	0	0	0	0	0	0	0	0	0
hsa-miR-519c-5p	0.433543	0	0	0	0	0	0	0	0.400208	0	0	0	0	0	0	0	0	0	0	0	0	0	0	0	0	0	0	0	0	0	0	0	0	0	0	0	0	0	0	0	0	0	0	0	0	0	0	0	0
hsa-miR-519d-3p	1.08386	0	0	0	0	0	0	0	0.545739	0	0	0	0	0	0	0	0	0	0	0	0	0	0	0	0	0	0	0	0	0	0	0	0	0	0	0	0	0	0	0	0	0	0	0	0	0	0	0	0
hsa-miR-519d-5p	0	0	0	0	0	0	0	0	0	0	0	0	0	0	0	0	0	0	0	0	0	0	0	0	0	0	0	0	0	0	0	0	0	0	0	0	0	0	0	0	0	0	0	0	0	0	0	0	0
hsa-miR-519e-3p	0	0	0	0	0	0	0	0	0	0	0	0	0	0	0	0	0	0	0	0	0	0	0	0	0	0	0	0	0	0	0	0	0	0	0	0	0	0	0	0	0	0	0	0	0	0	0	0	0
hsa-miR-519e-5p	0	0	0	0	0	0	0	0	0	0	0	0	0	0	0	0	0	0	0	0	0	0	0	0	0	0	0	0	0	0	0	0	0	0	0	0	0	0	0	0	0	0	0	0	0	0	0	0	0
hsa-miR-520a-3p	1.95094	0	0	0	0	0	0	0	0	0	0	0	0	0	0	0	0	0	0	0	0	0	0	0	0	0	0	0	0	0	0	0	0	0	0	0	0	0	0	0	0	0	0	0	0	0	0	0	0
hsa-miR-520a-5p	0	0	0	0	0	0	0	0	0	0	0	0	0	0	0	0	0	0	0	0	0	0	0	0	0	0	0	0	0	0	0	0	0	0	0	0	0	0	0	0	0	0	0	0	0	0	0	0	0
hsa-miR-520b	0	0	0	0	0	0	0	0	0.545739	0	0	0	0	0	0	0	0	0	0	0	0	0	0	0	0	0	0	0	0	0	0	0	0	0	0	0	0	0	0	0	0	0	0	0	0	0	0	0	0
hsa-miR-520c-3p	0	0	0	0	0	0	0	0	1.30977	0	0	0	0	0	0	0	0	0	0	0	0	0	0	0	0	0	0	0	0	0	0	0	0	0	0	0	0	0	0	0	0	0	0	0	0	0	0	0	0
hsa-miR-520c-5p	0	0	0	0	0	0	0	0	0.109148	0	0	0	0	0	0	0	0	0	0	0	0	0	0	0	0	0	0	0	0	0	0	0	0	0	0	0	0	0	0	0	0	0	0	0	0	0	0	0	0
hsa-miR-520d-3p	0	0	0	0	0	0	0	0	0	0	0	0	0	0	0	0	0	0	0	0	0	0	0	0	0	0	0	0	0	0	0	0	0	0	0	0	0	0	0	0	0	0	0	0	0	0	0	0	0
hsa-miR-520d-5p	0	0	0	0	0	0	0	0	0	0	0	0	0	0	0	0	0	0	0	0	0	0	0	0	0	0	0	0	0	0	0	0	0	0	0	0	0	0	0	0	0	0	0	0	0	0	0	0	0
hsa-miR-520e	0	0	0	0	0	0	0	0	0	0	0	0	0	0	0	0	0	0	0	0	0	0	0	0	0	0	0	0	0	0	0	0	0	0	0	0	0	0	0	0	0	0	0	0	0	0	0	0	0
hsa-miR-520f-3p	0.433543	0	0	0	0	0	0	0	1.92828	0	0	0	0	0	0	0	0	0	0	0	0	0	0	0	0	0	0	0	0	0	0	0	0	0	0	0	0	0	0	0	0	0	0	0	0	0	0	0	0
hsa-miR-520f-5p	0	0	0	0	0	0	0	0	0	0	0	0	0	0	0	0	0	0	0	0	0	0	0	0	0	0	0	0	0	0	0	0	0	0	0	0	0	0	0	0	0	0	0	0	0	0	0	0	0
hsa-miR-520g-3p	0	0	0	0	0	0	0	0	0.14553	0	0	0	0	0	0	0	0	0	0	0	0	0	0	0	0	0	0	0	0	0	0	0	0	0	0	0	0	0	0	0	0	0	0	0	0	0	0	0	0
hsa-miR-520g-5p	0	0	0	0	0	0	0	0	0	0	0	0	0	0	0	0	0	0	0	0	0	0	0	0	0	0	0	0	0	0	0	0	0	0	0	0	0	0	0	0	0	0	0	0	0	0	0	0	0
hsa-miR-520h	0	0	0	0	0	0	0	0	1.30977	0	0	0	0	0	0	0	0	0	0	0	0	0	0	0	0	0	0	0	0	0	0	0	0	0	0	0	0	0	0	0	0	0	0	0	0	0	0	0	0
hsa-miR-521	0	0	0	0	0	0	0	0	1.34616	0	0	0	0	0	0	0	0	0	0	0	0	0	0	0	0	0	0	0	0	0	0	0	0	0	0	0	0	0	0	0	0	0	0	0	0	0	0	0	0
hsa-miR-522-3p	0	0	0	0	0	0	0	0	3.7474	0	0	0	0	0	0	0	0	0	0	0	0	0	0	0	0	0	0	0	0	0	0	0	0	0	0	0	0	0	0	0	0	0	0	0	0	0	0	0	0
hsa-miR-522-5p	0	0	0	0	0	0	0	0	0	0	0	0	0	0	0	0	0	0	0	0	0	0	0	0	0	0	0	0	0	0	0	0	0	0	0	0	0	0	0	0	0	0	0	0	0	0	0	0	0
hsa-miR-523-3p	0.650314	0	0	0	0	0	0	0	0.982329	0	0	0	0	0	0	0	0	0	0	0	0	0	0	2.97097	0	0	0	0	0	0	0	0	0	0	0	0	0	0	0	0	0	0	0	0	0	0	0	0	0
hsa-miR-523-5p	0	0	0	0	0	0	0	0	0	0	0	0	0	0	0	0	0	0	0	0	0	0	0	0	0	0	0	0	0	0	0	0	0	0	0	0	0	0	0	0	0	0	0	0	0	0	0	0	0
hsa-miR-524-3p	0	0	0	0	0	0	0	0	0	0	0	0	0	0	0	0	0	0	0	0	0	0	0	0	0	0	0	0	0	0	0	0	0	0	0	0	0	0	0	0	0	0	0	0	0	0	0	0	0
hsa-miR-524-5p	0.867086	0	0	0	0	0	0	0	0.327443	0	0	0	0	0	0	0	0	0	0	0	0	0	0	0	0	0	0	0	0	0	0	0	0	0	0	0	0	0	0	0	0	0	0	0	0	0	0	0	0
hsa-miR-525-3p	0	0	0	0	0	0	0	0	0.14553	0	0	0	0	0	0	0	0	0	0	0	0	0	0	0	0	0	0	0	0	0	0	0	0	0	0	0	0	0	0	0	0	0	0	0	0	0	0	0	0
hsa-miR-525-5p	0	0	0	0	0	0	0	0	0.254678	0	0	0	0	0	0	0	0	0	0	0	0	0	0	0	0	0	0	0	0	0	0	0	0	0	0	0	0	0	0	0	0	0	0	0	0	0	0	0	0
hsa-miR-526a	0	0	0	0	0	0	0	0	0	0	0	0	0	0	0	0	0	0	0	0	0	0	0	0	0	0	0	0	0	0	0	0	0	0	0	0	0	0	0	0	0	0	0	0	0	0	0	0	0
hsa-miR-526b-3p	0	0	0	0	0	0	0	0	0	0	0	0	0	0	0	0	0	0	0	0	0	0	0	0	0	0	0	0	0	0	0	0	0	0	0	0	0	0	0	0	0	0	0	0	0	0	0	0	0
hsa-miR-526b-5p	0	0	0	0	0	0	0	0	0	0	0	0	0	0	0	0	0	0	0	0	0	0	0	0	0	0	0	0	0	0	0	0	0	0	0	0	0	0	0	0	0	0	0	0	0	0	0	0	0
hsa-miR-527	0	0	0	0	0	0	0	0	0	0	0	0	0	0	0	0	0	0	0	0	0	0	0	0	0	0	0	0	0	0	0	0	0	0	0	0	0	0	0	0	0	0	0	0	0	0	0	0	0
hsa-miR-532-3p	11.7057	24.1696	27.7145	34.3597	26.8251	14.6122	7.71007	5.57964	45.4054	298.116	301.874	283.009	245.389	102.263	223.061	337.048	431.734	42.8247	34.2078	76.2013	38.0309	49.0494	157.756	220.595	35.777	39.4098	40.9757	23.8218	23.3027	32.3321	29.7927	32.9175	25.2513	28.1255	29.4187	49.4124	42.959	72.3028	41.0479	38.1102	62.8309	31.8563	5.65438	2.10362	18.8625	18.6714	14.01	10.2192	12.1357
hsa-miR-532-5p	272.482	46.6883	63.9943	68.9062	58.7336	393.607	139.21	121.23	188.753	177.095	161.114	197.193	171.063	73.8629	129.69	93.2367	154.388	378.54	700.446	886.391	358.701	574.302	260.749	591.223	114.441	119.824	114.866	95.8012	112.802	126.868	130.332	131.227	124.953	118.185	535.169	595.27	602.154	629.948	649	568.882	634.439	561.136	19.925	8.06386	106.101	57.4287	87.1505	56.0333	23.3457
hsa-miR-539-3p	0	3.23583	4.22142	3.85924	2.69476	4.85736	8.56675	4.05792	3.7474	0	0	0	0	0	0	0	0	71.8843	37.0585	13.225	25.0658	39.7802	3.42271	2.47581	0	0	0	0	0	0	0	0	0	0	15.6482	21.8874	0	0	62.1265	3.81102	17.3679	17.9192	0	0	0	0	0	0	0
hsa-miR-539-5p	0	0.462261	0.73416	0.74695	0.428712	1.08387	0	0	0.545739	0	0	0	0	0	0	0	0	12.2356	21.9907	17.6334	23.3371	11.5865	12.7574	1.98065	0	0	0	0	0	0	0	0	0	0	0	0	1.45624	0	0.832052	0	0	0	0	0	0	0	0	0	0
hsa-miR-541-3p	0	0	0	0	0	0.843013	0	0	0	0	0	0	0	0	0	0	0	0	0	0	0	0	0	0	0	0	0	0	0	0	0	0	0	0	0	0	0	0	0	0	0	0	0	0	0	0	0	0	0
hsa-miR-541-5p	0	0.264149	0.36708	0.74695	0.428712	2.44875	0	0	0	0	0	0	0	0	0	0	0	0	0	0	0	0	0	0	0	0	0	0	0	0	0	0	0	0	0	0	0	0	0	0	0	0	0	0	0	0	0	0	0
hsa-miR-542-3p	12.5727	9.50937	6.54626	10.0216	7.10437	6.02152	23.5585	30.4344	284.366	0.377601	0	0	0.483685	0	0	0	0	54.2956	43.167	43.4536	21.6085	30.8972	6.53427	7.67501	0	0	0	0	0	0	0	0	0	0	106.408	101.146	40.7747	78.9513	153.93	64.4409	107.783	91.5869	0	0	0	0	0	0	0
hsa-miR-542-5p	0	1.45282	1.04006	1.12043	1.22489	1.64588	0	4.56516	12.6975	0.377601	0	0	0	0.330237	0.285975	0	0	5.35309	4.88683	8.18692	0	3.86216	10.8905	6.68469	0	0	0.40304	0	0	0	0	0	0	0	19.4038	26.5301	13.8343	26.5941	22.7427	15.937	28.6059	20.5739	0	0	0	0	0	0	0
hsa-miR-543	7.80377	8.84899	12.5419	8.65217	11.9427	3.37205	0.856675	1.52172	0.836799	0	0.384063	0.684698	1.1286	0.99071	2.85975	4.98592	2.89477	74.9432	73.7097	116.821	52.7247	69.1326	37.6499	37.1371	0	0	0	0	0	0	0	0	0	0	0	0.663254	0	0	1.6641	3.81102	0	2.98653	0	0	0	0	0	0	0
hsa-miR-544a	0	0.132075	0	0	0	0	0	0	0.545739	0	0	0	0	0	0	0	0	7.64727	2.03618	0	4.32169	2.70351	0	10.1508	0	0	0	0	0	0	0	0	0	0	0	0	0	0	0	0	0	0	0	0	0	0	0	0	0
hsa-miR-544b	0	0.132075	0	0.248983	0	0	0	0	0	0.377601	0	0	0.806141	0	0	0	0	0	0	1.57441	0	0	0	0	0	0	0	0	0	0	0	0	0	0	0	0	0	0	0	0	0	0	0	0	0	0	0	0	0
hsa-miR-545-3p	0	0.132075	0	0	0	0	0	0	2.07381	0	0	0	0	0	0	0	0	2.29418	1.62894	0	0	3.47594	0	1.73307	0	0	0	0	0	0	0	0	0	0	0	0	0	0	0	2.07874	0	0	0	0	0	0	0	0	0
hsa-miR-545-5p	0	0	0	0	0	0.401435	0	1.52172	2.94699	0	0	0	0	0	0	0	0	0	0	1.25953	1.72868	0	1.86693	0	0	0	0	0	0	0	0	0	0	0	3.12965	0	0	0	1.6641	0	2.04328	0	0	0	0	0	0	0	0
hsa-miR-548-3p	0	0	0	0	0	0	0	0	0	0	0	0	0	0	0	0	0	0	0	0	0	0	0	0	0	0	0	0	0	0	0	0	0	0	0	0	0	0	0	0	0	0	0	0	0	0	0	0	0
hsa-miR-548a	0	0	0	0	0	0.481722	0	0	0.472973	0	0	0	0	0	0	0	0	0	0	0	0	0	0	0	0	0	0	0	0	0	0	0	0	0	0	0.99488	0	0	1.94145	0	0	1.99102	0	0	0	0	0	0	0
hsa-miR-548a-3p	0	0.72641	0.97888	0.871442	0.306223	0.281004	0	0	3.16528	0	0	0	0	0	0	0	0	17.5887	4.88683	3.77858	6.91471	12.7451	3.73387	2.22823	0	0	0	0	0	0	0	0	0	0	0	0	0	0	0	0	0	0	0	0	0	0	0	0	0
hsa-miR-548a-5p	0	0	0	0	0	0	0	0	0	0	0	0	0	0	0	0	0	5.35309	1.22171	0	0	1.93108	0	0	0	0	0	0	0	0	0	0	0	0	0	0	0	0	0	0	0	0	0	0	0	0	0	0	0
hsa-miR-548ab	0	0	0	0	0	0	0	0	0.363826	0	0	0	0	0	0	0	0	6.88254	6.10854	2.83393	2.59302	11.9727	0	0	0	0	0	0	0	0	0	0	0	0	1.25186	0.99488	0	0	1.94145	2.07874	0	0	0	0	0	0	0	0	0
hsa-miR-548ac	0	0.198112	0.24472	0	0.183734	0	0	0	0.582121	2.83201	2.68844	2.51056	3.06334	0.660473	3.28871	0	2.75692	0	0	0	0	0	0	0	0	0.227803	0	0.257069	0	0	0	0.295224	0	0	0	0	0	0	0	0	0	0	0	0	0	0	0	0	0
hsa-miR-548ad-3p	0	0	0	0	0	0	0	0	0	0	0	0	0	0	0	0	0	0	0	0	0	0	0	0	0	0	0	0	0	0	0	0	0	0	0	0	0	0	0	0	0	0	0	0	0	0	0	0	0
hsa-miR-548ad-5p	0	0	0.24472	0.435721	0.489957	0.321148	1.28501	0	1.63722	0.755202	0	0.684698	0.806141	0	0	0	0	6.88254	0	0	0	1.93108	0	0	0	0	0	0	0	0	0	0	0	0	3.75557	0.99488	0	4.15533	2.77351	1.73228	2.5541	0.99551	0	0	0	0	0	0	0
hsa-miR-548ae-3p	0	0	0	0	0	0	0	0	0	0	0	0	0	0	0	0	0	0	0	0	0	0	0	0	0	0	0	0	0	0	0	0	0	0	0	0	0	0	0	0	0	0	0	0	0	0	0	0	0
hsa-miR-548ae-5p	0	0.198112	0.55062	0.186738	0.244978	0	0	0	0.691269	3.39841	0	0	0	0	0	0	0	0	1.22171	1.25953	5.18603	2.70351	0	0	0	0	0	0	0	0	0	0	0	0	0	1.32651	3.64059	0	1.94145	2.07874	1.53246	0.663673	0	0	0	0	0	0	0
hsa-miR-548ag	0	0	0	0	0	0	0	0	0	0	0	0	0	0	0	0	0	0	0	0	0	0	0	0	0	0	0	0	0	0	0	0	0	0	0	0	0	0	0	0	0	0	0	0	0	0	0	0	0
hsa-miR-548ah-3p	0	0	0	0	0.122489	0	4.28337	2.02896	0.363826	0	0.384063	0	0	0	0	0	0	0	5.7013	0	0	4.63459	0	0.495162	0	0	0	0	0	0	0	0	0	0	0	0	2.91248	2.4932	1.1094	3.81102	1.02164	1.65918	0	0	0	0	0	0	0
hsa-miR-548ah-5p	0	0	0	0	0	0	10.2801	4.56516	0.14553	0	0	0	0	0	0	0	0	2.29418	0	0	0	0	0	0	0	0	0	0	0	0	0	0	0	0	2.50372	1.65813	0	0	2.2188	2.4252	0	1.32735	0	0	0	0	0	0	0
hsa-miR-548ai	0	0	0.12236	0.435721	0	0.361291	0	0	0.945947	0	0	0.684698	0	0	0	0	0	4.58836	0	0	3.45735	2.31729	0.933467	0.742743	0	0	0	0	0	0	0	0	0	0	1.25186	0	0	0	1.1094	1.73228	0	0.99551	0	0	0	0	0	0	0
hsa-miR-548aj-3p	0	0	0	0	0	0	0	0	0	0	0	0	0	0	0	0	0	0	0	0	0	0	0	0	0	0	0	0	0	0	0	0	0	0	0	0	0	0	0	0	0	0	0	0	0	0	0	0	0
hsa-miR-548aj-5p	0	0	0	0	0	0	0	0	0	0	0	0	0	0	0	0	0	0	0	0	0	0	0	0	0	0	0	0	0	0	0	0	0	0	0	0	0	0	0	0	0	0	0	0	0	0	0	0	0
hsa-miR-548ak/548w	1.73417	0.792447	1.04006	1.36941	0.918669	1.32473	0	0	2.36487	0	0.768126	0	0.967369	0	0.57195	0	0	10.7062	15.8822	8.18692	10.3721	11.9727	0	2.72339	0	0	0	0	0	0	0	0	0	0	2.50372	1.65813	0	4.9864	0	2.77165	1.02164	1.99102	0	0	0	0	0	0	0
hsa-miR-548al	0	0.594335	0.6118	0.560213	0.673691	1.48531	0	0	0.836799	0	0	0	0	0	0	0	0	0	0	1.57441	0	0	0	0	0	0	0	0	0	0	0	0	0	0	3.75557	2.32139	2.18436	4.15533	4.16026	3.81102	2.5541	1.65918	0	0	0	0	0	0	0
hsa-miR-548am-3p	0	0	0	0	0	0	0	0	0.109148	0	0	0	0	0	0	0	0	0	0	0	0	0	0	0	0	0	0	0	0	0	0	0	0	0	0	0	0	0	0	0	0	0	0	0	0	0	0	0	0
hsa-miR-548an	0	0	0	0	0	0	0	0	0	0	0	0	0	0	0	0	0	0	0	0	0	0	0	0	0	0	0	0	0	0	0	0	0	0	0	0	0	0	0	0	0	0	0	0	0	0	0	0	0
hsa-miR-548ao-3p	0	0	0	0	0	0	0	0	0	0	0	0	0	0	0	0	0	0	0	0	0	0	0	0	0	0	0	0	0	0	0	0	0	0	0	0	0	0	0	0	0	0	0	0	0	0	0	0	0
hsa-miR-548ao-5p	0	0	0	0	0	0	0	0	0	0	0	0	0	0	0	0	0	0	0	0	0	0	0	1.98065	0	0	0	0	0	0	0	0	0	0	0	0	0	0	0	0	0	0	0	0	0	0	0	0	0
hsa-miR-548ap-3p/548t-3p/548aa	3.68511	3.30186	3.54844	4.35721	2.8785	4.45593	5.99672	6.08688	6.36695	8.49602	7.48923	7.75991	7.73895	5.7241	9.00822	3.49014	4.68677	28.2949	27.2848	19.2078	25.0658	32.4421	17.7359	0	0	0	0	0	0	0	0	0	0	0	14.3964	9.28555	10.9218	8.31067	0	11.4331	0	0	0	0	0.392968	0	0	0	0
hsa-miR-548ap-5p/548j-5p	3.25157	2.24527	3.12018	2.05411	3.55219	1.28459	0	0	3.05614	0.377601	0.960158	1.14116	2.09597	0	0.57195	0	0.551385	19.1182	19.5473	16.3738	16.4224	28.5799	1.86693	2.47581	0	0	0	0	0	0	0	0	0	0	2.50372	2.32139	0	0	3.60556	0	3.57574	1.99102	0	0	0	0	0	0	0
hsa-miR-548aq-3p	0.867086	0	0.24472	0.124492	0.122489	0.602152	4.28337	5.0724	2.25572	0	0	0	0	0.220158	0	0	0	7.64727	4.88683	3.4637	4.32169	9.26917	0	0	0	0	0	0	0	0	0	0	0	0	0	0	0	0	0	0	0	0	0	0	0	0	0	0	0
hsa-miR-548aq-5p	0	0	0	0	0	0	0	0	0.327443	0	0	0	0	0	0	0	0	0	1.22171	0	0	0	0	0	0	0	0	0	0	0	0	0	0	0	0	0	0	0	0	0	0	0	0	0	0	0	0	0	0
hsa-miR-548ar-3p	0	0	0	0	0	0.160574	0	0	0.545739	0	0	0	0	0	0	0	0	0	0	0	0	0	0	0	0	0	0	0	0	0	0	0	0	0	0	0	0	0	0	0	0	0	0	0	0	0	0	0	0
hsa-miR-548ar-5p	0	0	0	0	0	0	0	0	0	0	0	0	0	0	0	0	0	0	0	0	0	0	0	0	0	0	0	0	0	0	0	0	0	0	0	0	0	0	0	0	0	0	0	0	0	0	0	0	0
hsa-miR-548as-3p	0	0	0	0	0	0	0	0	0	0	0	0	0	0	0	0	0	0	0	0	0	0	0	0	0	0	0	0	0	0	0	0	0	0	0	0	0	0	0	0	0	0	0	0	0	0	0	0	0
hsa-miR-548as-5p	0	0	0	0	0	0	0	0	0.291061	0	0	0	0	0	0	0	0	0	0	0	0	0	0	0	0	0	0	0	0	0	0	0	0	0	0	0	0	0	0	0	0	0	0	0	0	0	0	0	0
hsa-miR-548at-3p	0	0	0	0	0	0	0	0	0	0.944002	1.15219	1.59763	1.1286	0.330237	1.42988	0	0.275692	0	0	0	0	1.54486	0	0	0.22934	0	0	0	0	0	0	0	0	0	0	0	0	0	0	0	0	0	0	0	0	0	0	0	0
hsa-miR-548at-5p	0	0	0	0	0	0.722582	0	0	0.582121	2.26561	0.768126	0	0	0.660473	0	0	0.413539	0	2.85065	1.25953	0	0	0	0	0	0	0	0.257069	0.309328	0.263577	0.263652	0	0	0	1.87779	1.65813	0	0	1.38675	0	0	0	0	0	0.884178	0.5658	0.412059	0	0
hsa-miR-548au-3p	0	0	0	0	0	0	0	0	0	0	0	0	0	0	0	0	0	0	0	0	0	0	0	0	0	0	0	0	0	0	0	0	0	0	0	0	0	0	0	0	0	0	0	0	0	0	0	0	0
hsa-miR-548au-5p/548c-5p/548o-5p/548am-5p	1.30063	0.792447	1.04006	1.12043	0.551201	1.88674	1.71335	0	6.54886	8.68482	0	7.53168	0	0	0	0	0	29.8243	19.1401	16.3738	27.6588	20.8556	0	3.71371	0	0	0	0	0	0	0	0	0	0	4.3815	4.9744	3.64059	0	3.60556	3.11811	2.5541	1.32735	0	0	0	0	0	0	0
hsa-miR-548av-3p	0	0	0	0	0	0	0	0	0	0	0	0	0	0	0	0	0	0	0	0	0	0	0	0	0	0	0	0	0	0	0	0	0	0	0	0	0	0	0	0	0	0	0	0	0	0	0	0	0
hsa-miR-548av-5p/548k	2.16771	2.90564	4.95558	4.66844	4.04214	13.6086	18.4185	14.71	1.09148	3.58721	3.45657	5.02112	3.06334	0.99071	2.00183	0	0	9.17672	11.4026	9.13156	8.64339	11.2002	0	2.22823	0	1.13901	0.671733	0.514139	0.412438	0.263577	0.439421	0	0.325823	0.582911	20.0297	15.9181	21.1154	14.1281	15.809	12.8189	13.2813	15.5963	0.628265	0.233735	2.35781	1.4145	1.64824	0.574112	0.205689
hsa-miR-548aw	0	0.660373	0.6118	0.560213	0.306223	0.441578	0	0	1.34616	0	0	0	0	0	0	0	0	5.35309	2.85065	5.66787	0	3.47594	0	2.22823	0	0	0	0	0	0	0	0	0	0	0	0	0	0	0	0	0	0	0	0	0	0	0	0	0
hsa-miR-548ay-3p	0	0	0	0	0	0.481722	0	0	0.436591	2.26561	2.88047	0.456466	2.90211	1.65118	3.28871	1.99437	2.48123	0	0	0	0	0	0	0	0.57335	0.455605	0.40304	0.17138	0	0.351436	0.439421	0	0.488734	0.291456	1.87779	0	0	0	0	0	0	0	0	0	0	0	0.412059	0	0
hsa-miR-548ay-5p	0	0	0	0	0	0.682439	0	1.01448	2.98337	1.5104	1.15219	2.51056	0.644913	0	1.28689	0	0	2.29418	4.88683	1.25953	0	1.15865	0	0.990324	0	0	0	0	0	0	0	0	0	0	3.75557	0	2.18436	0	0	0	0	0	0	0	0	0	0	0	0
hsa-miR-548az-3p	0	0	0	0	0	0	0	0	0	0	0	0	0	0	0	0	0	0	1.62894	0	0	3.08972	0	0	0	0	0	0	0	0	0	0	0	0	0	0	0	0	0	0	0	0	0	0	0	0	0	0	0
hsa-miR-548az-5p	0	0	0.36708	0.248983	0	1.48531	0	1.52172	1.05509	0	0	0	0	0	0	0	0	0	10.5881	9.13156	0	8.11053	0	2.97097	0	0	0	0	0	0	0	0	0	0	0	3.31627	0	0	0	0	1.53246	1.99102	0	0	0	0	0	0	0
hsa-miR-548b-3p	0	0.198112	0	0.186738	0.183734	1.2043	0	0	2.69231	0	0	0	0	0	0	0	0.275692	13.0004	7.33024	5.98275	8.64339	5.0208	0	6.4371	0	0	0	0	0	0	0	0	0	0	3.75557	1.98976	1.45624	4.9864	3.60556	3.11811	6.12984	1.32735	0	0	0	0	0	0	0
hsa-miR-548b-5p	0	0	0	0	0	0.762726	2.99836	1.01448	3.7474	0	0	0	0	0	0	0	0	2.29418	0	0	0	1.54486	0	0	0	0	0	0	0	0	0	0	0	0	2.50372	1.65813	2.91248	0	1.38675	0	3.57574	0	0	0	0	0	0	0	0
hsa-miR-548ba	0	0.924522	0.6118	1.99187	0.489957	13.3678	0	0	3.7474	0	0	0	0	0	0	0	0	0	2.44341	0	0	0	0	0	0	0	0	0	0	0	0	0	0	0	3.75557	2.65301	4.36871	0	1.94145	0	0	2.98653	0	0	0	0	0	0	0
hsa-miR-548bb-3p	0	0	0	0	0	0	0	0	0	0	0	0	0	0	0	0	0	0	0	0	0	0	0	0	0	0	0	0	0	0	0	0	0	0	0	0	0	0	0	0	0	0	0	0	0	0	0	0	0
hsa-miR-548bb-5p	0	0	0	0	0	0	0	0	0	0	0	0	0	0	0	0	0	0	0	0	0	0	0	0	0	0	0	0	0	0	0	0	0	0	0	0	0	0	0	0	0	0	0	0	0	0	0	0	0
hsa-miR-548c-3p	0	0	0	0	0	0	0	0	0.654886	0	0	0	0	0	0	0	0	0	0	0	0	0	0	0	0	0	0	0	0	0	0	0	0	0	0	0	0	0	0	0	0	0	0	0	0	0	0	0	0
hsa-miR-548d-3p	0	0.132075	0	0	0	0.722582	0	0	1.05509	0.944002	1.92032	1.14116	1.61228	0.440316	1.71585	0	0.413539	0	2.03618	0	0	4.24837	1.55578	0.495162	0	0	0	0	0	0	0.175768	0	0	0	0	0	0	0	0	0	0	0	0	0	0	0	0	0	0
hsa-miR-548d-5p	0	0.528298	0.67298	0.560213	0.734935	0.762726	0	0	2.65593	2.64321	2.30438	3.19526	1.93474	0	1.00091	0	0.413539	0	3.66512	2.51905	6.91471	6.56566	0	0.742743	0.34401	0	0	0	0	0.175718	0.263652	0	0	0	0	0	0	0	0.832052	0	0	0.99551	0	0	0.196484	0	0	0	0
hsa-miR-548e-3p	4.5522	4.68865	3.9767	5.85111	4.22588	3.81363	8.13841	9.13032	6.14865	1.888	1.72828	3.65172	1.77351	1.65118	3.28871	0.997183	2.48123	13.7651	12.2171	4.09346	6.05037	10.814	2.17809	2.47581	0	0.227803	0	0	0.412438	0	0.527305	0.590448	0	0.437183	11.2667	6.96416	9.46555	4.15533	8.59787	6.58267	5.61902	6.96857	0	0	0	0	0	0	0
hsa-miR-548e-5p	0	0.330186	0.36708	0.497967	0	3.85377	2.99836	5.57964	0.836799	1.1328	0	0	0.967369	0.330237	0.57195	0	0.827077	0	3.66512	2.83393	0	0	0.933467	1.73307	0	0	0	0.257069	0	0.175718	0.351537	0	0	0	4.3815	5.30603	2.91248	2.4932	2.77351	2.4252	4.59738	2.65469	0	0	0	0	0	0	0
hsa-miR-548f-3p	0	0	0	0	0.122489	0.722582	0	0	2.54678	0	0	0	0	0	0	0	0	0	0	0	0	0	0	0	0	0	0	0	0	0	0	0	0	0	0	0	0	0	0	0	1.53246	0	0	0	0	0	0	0	0
hsa-miR-548f-5p	2.16771	0.330186	0.42826	0.684704	0.734935	3.0509	1.71335	1.01448	6.14865	1.5104	1.34422	0	0.644913	0.440316	0.428963	0	0.689231	4.58836	3.66512	1.57441	3.45735	3.47594	0	1.73307	0.34401	0	0	0	0	0	0.175768	0	0.325823	0.437183	5.00743	4.64277	14.5624	0	4.99231	6.92913	4.08656	2.98653	0	0	0	0	0	0	0
hsa-miR-548g-3p	0	0	0	0	0	0	0	0	0	0	0	0	0	0	0	0	0	0	0	0	0	0	0	0	0	0	0	0	0	0	0	0	0	0	0	0	0	0	0	0	0	0	0	0	0	0	0	0	0
hsa-miR-548g-5p	0	0	0	0	0	0	0	0	0.691269	0	0	0	0	0	0	0	0	0	0	0	0	0	0	0	0	0	0	0	0	0	0	0	0	0	0	0	0	0	0	0	0	0	0	0	0	0	0	0	0
hsa-miR-548h-3p	0	0	0	0.435721	0	0	0	0	3.82017	0	0	0	0	0	0	0	0	7.64727	9.36642	6.29763	6.05037	11.5865	1.86693	0	0	0	0	0	0	0	0	0	0	0	0	0	0	0	0	0	0	0	0	0	0	0	0	0	0
hsa-miR-548h-5p	0	0.792447	1.71304	1.30716	1.34738	0.9233	0	0	0.764034	0	0	0	0	0	0	0	0	0	0	0	0	0	0	0	0	0	0	0	0	0	0	0	0	0	0	0	0	0	0	3.81102	0	0	0	0	0	0	0	0	0
hsa-miR-548i	0	0	0	0	0	0	0	0	0	0	0	0	0	0	0	0	0	0	0	0	0	0	0	0	0	0	0	0	0	0	0	0	0	0	0	0	0	0	0	0	0	0	0	0	0	0	0	0	0
hsa-miR-548j-3p	0	0	0	0	0.122489	0	0	0	0.800417	0	0	0	0	0	0	0	0	5.35309	0	0	0	1.54486	0	0.990324	0	0	0	0	0	0	0	0	0	0	0	0	0	0	0.554701	0	0	0	0	0	0	0	0	0	0
hsa-miR-548l	0	2.77357	2.32484	2.67657	2.51103	3.77349	1.28501	0	1.49169	1.5104	0.768126	1.3694	1.1286	0	0.857926	0	0	18.3534	13.846	0	0	0	0	7.92259	0	0	0	0	0	0	0	0	0	0	0	2.65301	0	0	0	0	0	0	0	0	0.589452	0	0	0	0
hsa-miR-548m	0	0	0	0	0	0	0	0	0	0	0	0	0	0	0	0	0	0	0	0	0	0	0	0	0	0	0	0	0	0	0	0	0	0	0	0	0	0	0	0	0	0	0	0	0	0	0	0	0
hsa-miR-548n	0	0.330186	0.24472	0.186738	0.183734	0.200717	0	0	0.727651	0	0	0	0	0	0	0	0	3.05891	0	0.944644	0	0	0	0	0	0	0	0	0	0	0	0	0	0	0	0.663254	0	0	1.38675	0	0	1.65918	0	0	0	0	0	0	0
hsa-miR-548o-3p	3.25157	0.792447	0.97888	1.74288	1.22489	4.8975	7.28173	7.10136	2.47401	5.85281	7.48923	5.70582	10.3186	3.85276	6.14847	1.99437	3.44616	6.88254	6.51577	5.0381	8.64339	8.49674	8.71236	12.6266	4.12812	4.32825	2.68693	1.97086	2.57774	3.25078	3.8669	2.65701	3.25823	3.35174	5.63336	3.64789	4.36871	0	6.65641	3.11811	7.15148	5.97306	1.52579	0.233735	4.61737	1.4145	3.70853	0.803756	1.02845
hsa-miR-548p	0.433543	0.132075	0	0	0	0.361291	8.13841	7.6086	0	0	0.960158	0	0.483685	0	0.428963	0	0	0	0	0	0	0	0	0	0	0	0	0	0	0	0	0	0	0	2.50372	0	0	0	0	1.38583	0	0.99551	0	0	0	0	0	0	0
hsa-miR-548q	3.0348	2.04716	1.65186	1.74288	1.59236	2.20789	4.28337	4.05792	2.03742	5.47521	7.10517	15.5198	7.09404	5.7241	14.7277	2.99155	11.3034	16.824	19.9546	20.4673	14.6938	20.0832	5.28965	0	1.49071	1.02511	1.20912	0	0.515547	0.790731	0.966725	0.590448	0	1.02009	6.88522	3.64789	7.28119	2.4932	3.05086	5.19685	5.61902	4.97755	0.448761	0	1.1789	1.1316	1.03015	0.918578	0.719913
hsa-miR-548s	0	0	0	0	0	0.321148	0	0	0.436591	0	0	0	0	0	0	0	0	0	1.22171	0.629763	0	1.93108	0	0	0	0	0	0	0	0	0	0	0	0	0	0.663254	0	0	0	0	0	0	0	0	0	0	0	0	0
hsa-miR-548t-5p	0	0.858485	1.10124	0.809196	1.16365	0	0	0	0.218295	0	0	0	0.806141	0.220158	0	0	0	1.52945	0	0	0	0	0	0	0	0	0	0	0	0.175718	0.175768	0	0	0	0	0	0	0	0	0	0	0	0	0	0	0	0	0	0
hsa-miR-548u	0	0.528298	0.18354	0	0.244978	0	0	0	0.836799	0	0	0	0	0	0	0	0	0	0	0	0	0	0	0	0	0	0	0	0	0	0	0	0	0	0	0	0	0	0	0	0	0	0	0	0	0	0	0	0
hsa-miR-548v	0	0	0.18354	0.373475	0.122489	0	0	1.01448	1.49169	0	0	0	0	0	0	0	0	13.7651	8.55195	4.72322	6.05037	9.26917	0	0	0	0	0	0	0	0	0	0	0	0	0	0	0	0	0	0	0	0	0	0	0	0	0	0	0
hsa-miR-548x-5p	0	0	0	0	0	0	0	0	0	0	0	0	0	0	0	0	0	0	0	0	0	0	0	0	0	0	0	0	0	0	0	0	0	0	0	0	0	0	0	0	0	0	0	0	0	0	0	0	0
hsa-miR-548y	0	0	0	0	0	0	0	0	0.291061	0	0	0	0	0	0	0	0	0	0	0	0	3.86216	0	0	0	0	0	0	0	0	0	0	0	0	0	0	0	0	0	0	0	0	0	0	0	0	0	0	0
hsa-miR-548z	0	0	0	0	0	0	0	0	1.23701	0	0	0	0	0	0	0	0	9.17672	4.07236	5.35298	0	0	0	0	0	0	0	0	0	0	0	0	0	0	0	0	0	0	0	0	0	0	0	0	0	0	0	0	0
hsa-miR-549a	0	0	0	0	0	0.602152	0	0	0.909564	0	0	0	0	0	0	0	0	0	0	0	0	0	0	0	0	0	0	0	0	0	0	0	0	0	0	0	0	0	0	0	0	0	0	0	0	0	0	0	0
hsa-miR-550a-3-5p	0	0	0	0.186738	0.122489	0.762726	0	0	0.363826	5.47521	5.76095	10.0422	5.1593	5.06363	9.58017	10.969	6.75446	5.35309	1.62894	4.09346	2.59302	0	1.24462	0	0.57335	0	0.537386	0.17138	0	0.439295	0.263652	0.442836	0	0.291456	0	0.663254	0	0	2.49616	2.07874	0	0	0.628265	0	1.8666	0.8487	0.618089	1.83716	0.617068
hsa-miR-550a-3p	0.650314	2.04716	1.65186	0.622459	1.28614	3.29176	1.71335	2.02896	6.33057	134.804	120.596	275.02	177.673	165.449	330.015	232.344	129.162	32.8832	44.3887	62.9763	32.8449	48.6632	9.64583	6.68469	42.8866	41.9157	38.9605	17.8235	21.653	25.8305	27.6835	24.2084	20.5268	21.422	9.38894	4.31115	8.00931	9.14173	3.60556	15.2441	8.17312	6.30489	6.46215	1.98675	41.0652	20.9346	36.0552	11.4822	11.0044
hsa-miR-550a-5p	0	0	0	0	0	4.41578	2.14169	2.02896	1.30977	13.5936	17.0908	22.8233	20.7984	16.6219	33.1731	17.9493	13.3711	15.2945	19.1401	19.8375	12.1007	16.2211	4.66734	3.46613	3.09609	3.30314	3.76171	2.14224	2.06219	2.98721	2.63652	2.06657	1.95494	2.04019	0	1.65813	5.09683	1.66213	1.6641	4.50393	2.5541	2.32286	3.41058	0.584338	5.50155	5.0922	2.67838	3.55949	5.24508
hsa-miR-550b-2-5p	0	0	0	0	0	0	0	0	0	0	0	0	0	0	0	0	0	0	0	0	0	0	0	0	0	0	0	0	0	0	0	0	0	0	0	0	0	0	0	0	0	0	0	0	0	0	0	0	0
hsa-miR-550b-3p	0	0	0	0	0	0	0	0	0	0	0	0	0	0	0	0	0	0	0	0	0	0	0	0	0	0	0	0	0	0	0	0	0	0	0	0	0	0	0	0	0	0	0	0	0	0	0	0	0
hsa-miR-551a	0	0	0.6118	0.560213	0.306223	0.762726	0	0	1.41892	0	0	1.59763	0	0	0.714938	0	0	0	0.814472	4.72322	0	3.47594	4.35618	2.72339	0	0	0	0	0	0	0	0	0	0	0	0	0	0	0	0	5.1082	0	0	0	0	0	0	0	0
hsa-miR-551b-3p	0	51.6411	51.0241	67.9102	46.1172	1.24445	0	0	11.315	0	0	0	0	0	0	0	0	29.8243	23.2124	39.6751	80.3835	42.8699	1.86693	0	0	0	0	0	0	0	0	0	0	0	8.13708	6.63254	3.64059	0	3.05086	4.15748	3.06492	2.65469	0	0	0	0	0	0	0
hsa-miR-551b-5p	0	0.792447	0.55062	0.435721	0.367468	0	0	0	0	0	0	0	0	0	0	0	0	0	0	1.57441	0	0	0	1.73307	0	0	0	0	0	0	0	0	0	0	0	0	0	0	0	0	0	0	0	0	0	0	0	0	0
hsa-miR-552-3p	1.08386	0	0	0	0	3.61291	0	0	2.25572	0	0	0	0	0	0	0	0	0	11.8098	9.76132	0	4.63459	0	0	0	0	0	0	0	0	0	0	0	0	0	0	0	0	0	0	0	0	0	0	0	0	0	0	0
hsa-miR-552-5p	0	0	0	0	0	1.80646	0	0	0.691269	0	0	0	0	0	0	0	0	0	0	0	0	0	0	0	0	0	0	0	0	0	0	0	0	0	0	0	0	0	0	0	0	0	0	0	0	0	0	0	0
hsa-miR-553	0	0	0	0	0	0	0	0	0	0	0	0	0	0	0	0	0	0	0	0	0	0	0	0	0	0	0	0	0	0	0	0	0	0	0	0	0	0	0	0	0	0	0	0	0	0	0	0	0
hsa-miR-554	0	0	0	0	0	0	0	0	0	0	0	0	0	0	0	0	0	0	0	0	0	0	0	0	0	0	0	0	0	0	0	0	0	0	0	0	0	0	0	0	0	0	0	0	0	0	0	0	0
hsa-miR-555	0	0	0	0	0	0	0	0	0	0	0	0	0	0	0	0	0	0	0	0	0	0	0	0	0	0	0	0	0	0	0	0	0	0	0	0	0	0	0	0	0	0	0	0	0	0	0	0	0
hsa-miR-556-3p	0	0.594335	0.24472	0.622459	0.122489	0.602152	0	0	0.618504	0	0	0	0	0	0	0	0	5.35309	0	0	0	0	0	0	0	0	0	0	0	0	0	0	0	0	0	0	0	0	0	0	0	0	0	0	0	0	0	0	0
hsa-miR-556-5p	0	0	0	0	0	0.883156	1.71335	2.02896	1.34616	0	0	0	0	0	0	0	0	20.6476	9.36642	8.5018	16.4224	11.2002	0	2.47581	0	0	0	0	0	0	0	0	0	0	0	0	0	0	0	0	0	0	0	0	0	0	0	0	0
hsa-miR-557	0	0	0	0	0	0	0	0	0	0	0	0	0	0	0	0	0	0	0	0	0	0	0	0	0	0	0	0	0	0	0	0	0	0	0	0	0	0	0	0	0	0	0	0	0	0	0	0	0
hsa-miR-5571-3p	0	0	0	0	0	6.34267	0	0	0.545739	0	0	0	0	0	0	0	0	0	0	0	0	0	0	0	0	0	0	0	0	0	0	0	0	0	4.3815	3.31627	7.28119	0	0	4.50393	0	0	0	0	0	0	0	0	0
hsa-miR-5571-5p	0	0	0	0	0	1.96703	0	0	0	0	0	0	0	0	0	0	0	0	0	0	0	0	0	0	0	0	0	0	0	0	0	0	0	0	0	1.98976	0	0	0	0	0	0	0	0	0	0	0	0	0
hsa-miR-5572	0	0	0	0	0	0	0	0	0	0	0	0	0	0	0	0	0	0	0	0	0	0	0	0	0	0	0	0	0	0	0	0	0	0	0	0	0	0	0	0	0	0	0	0	0	0	0	0	0
hsa-miR-5579-3p	0	0	0	0	0	0	0	0	0	0	0	0	0	0	0	0	0	0	0	0	0	0	0	0	0	0	0	0	0	0	0	0	0	0	0	0	0	0	0	0	0	0	0	0	0	0	0	0	0
hsa-miR-5579-5p	0	0	0	0	0	0	0	0	0	0	0	0	0	0	0	0	0	0	0	0	0	0	0	0	0	0	0	0	0	0	0	0	0	0	0	0	0	0	0	0	0	0	0	0	0	0	0	0	0
hsa-miR-558	0	0	0	0	0	0	0	0	0	0	0	0	0	0	0	0	0	0	0	0	0	0	0	0	0	0	0	0	0	0	0	0	0	0	0	0	0	0	0	0	0	0	0	0	0	0	0	0	0
hsa-miR-5580-3p	0	0	0	0	0	0	0	0	0	0	0	0	0	0	0	0	0	0	0	0	0	0	0	0	0	0	0	0	0	0	0	0	0	0	0	0	0	0	0	0	0	0	0	0	0	0	0	0	0
hsa-miR-5580-5p	0	0	0	0	0	0	0	0	0	0	0	0	0	0	0	0	0	0	0	0	0	0	0	0	0	0	0	0	0	0	0	0	0	0	0	0	0	0	0	0	0	0	0	0	0	0	0	0	0
hsa-miR-5581-3p	0	0	0	0	0	0.562009	0	0	0.727651	3.96481	2.88047	2.96703	2.74088	2.20158	2.00183	2.49296	1.24062	0	0	0	0	0	0	0	0	0.91121	0.537386	0.428449	0.412438	0.351436	0.615189	0	0	0.582911	0	0.99488	0	1.66213	0	0	2.04328	0	0	0	0	0	0	0	0
hsa-miR-5581-5p	0	0	0	0	0	0	0	0	0	0	0	0	0	0	0	0	0	0	0	0	0	0	0	0	0	0	0	0	0	0	0	0	0	0	0	0	0	0	0	0	0	0	0	0	0	0	0	0	0
hsa-miR-5582-3p	0	0	0	0	0	0.240861	0	0	0	0.566401	0.384063	0	0	0	0	0	0	0	0.814472	1.88929	0	0	0	0	0	0	0	0	0	0	0	0	0	0	0	0	0	0	0	0	0	0	0	0	0	0	0	0	0
hsa-miR-5582-5p	0	0	0	0	0	0	0	0	0	0	0	0	0	0	0	0	0	0	0	0	0	0	0	0	0	0	0	0	0	0	0	0	0	0	0	0	0	0	0	0	0	0	0	0	0	0	0	0	0
hsa-miR-5583-3p	0	0	0	0	0	0	0	0	0	0	0	0	0	0	0	0	0	0	0	0	0	0	0	0	0	0	0	0	0	0	0	0	0	0	0	0	0	0	0	0	0	0	0	0	0	0	0	0	0
hsa-miR-5583-5p	0	0	0	0	0	0	0	0	0	0	0	0	0	0	0	0	0	0	0	0	0	0	0	0	0	0	0	0	0	0	0	0	0	0	0	0	0	0	0	0	0	0	0	0	0	0	0	0	0
hsa-miR-5584-3p	0	0.264149	0	0	0	0	0	0	0	0	0	0	0	0	0	0	0	0	0	0	0	0	0	0	0	0	0	0	0	0	0	0	0	0	0	0	0	0	0	0	0	0	0	0	0	0	0	0	0
hsa-miR-5584-5p	0	0	0.12236	0	0	0	0	0	0	0	0	0	0	0	0	0	0	0	0	0	0	0	0	1.48549	0	0	0	0	0	0	0	0	0	0	0	0	0	0	0	0	0	0	0	0	0	0	0	0	0
hsa-miR-5585-3p	1.5174	0	0	0	0	1.40502	0	0	1.56445	0	0	0	0	0	0	0	0	0	0	3.4637	0	0	1.86693	0	0	0	0	0	0	0	0	0	0	0	0	0	0	0	0	0	0	0	0	0	0	0	0	0	0
hsa-miR-5585-5p	0	0	0	0	0	0	0	0	0	0	0	0	0	0	0	0	0	0	0	0	0	0	0	0	0	0	0	0	0	0	0	0	0	0	0	0	0	0	0	0	0	0	0	0	0	0	0	0	0
hsa-miR-5586-3p	0	0	0	0	0	0	0	0	0	0	0	0	0	0	0	0	0	0	0	0	0	0	0	0	0	0	0	0	0	0	0	0	0	0	0	0	0	0	0	0	0	0	0	0	0	0	0	0	0
hsa-miR-5586-5p	0	0	0	0	0	0	0	0	0	0	0	0	0	0	0	0	0	0	0	0	0	0	0	0	0	0	0	0	0	0	0	0	0	0	0	0	0	0	0	0	0	0	0	0	0	0	0	0	0
hsa-miR-5587-3p	0	0	0	0	0	0	0	0	0	0	0	0	0	0	0	0	0	0	0	0	0	0	0	0	0	0	0	0	0	0	0	0	0	0	0	0	0	0	0	0	0	0	0	0	0	0	0	0	0
hsa-miR-5587-5p	0	0	0	0	0	0	0	0	0	0	0	0	0	0	0	0	0	0	0	0	0	0	0	0	0	0	0	0	0	0	0	0	0	0	0	0	0	0	0	0	0	0	0	0	0	0	0	0	0
hsa-miR-5588-5p	0	3.16979	2.99782	2.17861	2.93974	0.843013	3.85504	4.56516	0.654886	0	0	0	0	0	0	0	0	0	0	0	0	0	0	0	0	0.227803	0	0	0	0	0	0	0	0	0	0	0	0	0	0	0	0	0	0	0.49121	0	0	0.344467	0
hsa-miR-5589-3p	0	0	0	0	0	0	11.1368	15.7244	0	0	0	0	0	0	0	0	0	0	0	0	0	0	0	0	0	0	0	0	0	0	0	0	0	0	0	0	0	0	0	0	0	0	0	0	0	0	0	0	0
hsa-miR-5589-5p	0	0	0	0	0	0	0.856675	2.02896	0	0	0	0	0	0	0	0	0	0	0	0	0	0	0	0	0	0	0	0	0	0	0	0	0	0	0	0	0	0	0	0	0	0	0	0	0	0	0	0	0
hsa-miR-559	0	0	0	0	0	1.08387	0	0	0	0	0	0	0	0	0.285975	0	0	0	0	4.09346	0	9.26917	0	0	0	0	0	0	0	0	0	0	0	0	0	0	0	0	0	0	0	0	0	0	0	0	0	0	0
hsa-miR-5590-3p	0	0	0	0	0	0	0.856675	0	0	0	0	0	0	0	0	0	0	0	0	0	0	0	0	0	0	0	0	0	0	0	0	0	0	0	0	0	0	0	0	0	0	0	0	0	0	0	0	0	0
hsa-miR-5590-5p	0	0	0	0	0	0	1.28501	1.52172	0	0	0	0	0	0	0	0	0	0	0	0	0	0	0	0	0	0	0	0	0	0	0	0	0	0	0	0	0	0	0	0	0	0	0	0	0	0	0	0	0
hsa-miR-5591-3p	0	0	0	0	0	0	0	0	0	0	0	0	0	0	0	0	0	0	2.44341	0	3.45735	0	0	0	0	0	0	0	0	0	0	0	0	0	0	0	0	0	0	0	0	0	0	0	0	0	0	0	0
hsa-miR-5591-5p	0	0	0	0	0	0	0	0	0	0	0	0	0	0	0	0	0	0	0	0	0	0	0	0	0	0	0	0	0	0	0	0	0	0	0	0	0	0	0	0	0	0	0	0	0	0	0	0	0
hsa-miR-561-3p	0	0	0	0	0	0	0	0	0	0	0	0	0	0	0	0	0	4.58836	2.03618	0	0	0	0	0	0	0	0	0	0	0	0	0	0	0	0	0	0	0	0	0	0	0	0	0	0	0	0	0	0
hsa-miR-561-5p	0	0.198112	0	0.311229	0	5.78066	0	1.01448	2.5104	0	0	0	0.322456	0	0	0	0	29.8243	28.5065	17.9482	23.3371	35.918	0	0	0	0	0	0	0	0.615013	0.351537	0	0.325823	0.291456	11.8927	12.2702	13.1061	24.932	21.6333	16.9764	21.9653	17.2555	0	0	0	0	0	0	0
hsa-miR-562	0	0	0	0	0	0	0	0	0	0	0	0	0	0	0	0	0	0	0	0	0	0	0	0	0	0	0	0	0	0	0	0	0	0	0	0	0	0	0	0	0	0	0	0	0	0	0	0	0
hsa-miR-563	0	0	0	0	0	0	0	0	0	0	0	0	0	0	0	0	0	0	0	0	0	0	0	0	0	0	0	0	0	0	0	0	0	0	0	0	0	0	0	0	0	0	0	0	0	0	0	0	0
hsa-miR-564	0	0	0	0	0	0	0	0	0	0	0	0	0	0	0	0	0	0	0	0	0	0	0	0	0	0	0	0	0	0	0	0	0	0	0	0	0	0	0	0	0	0	0	0	0	0	0	0	0
hsa-miR-566	0	0	0	0	0	0	0	0	0	0	0	0	0	0	0	0	0	0	0	0	0	0	0	0	0	0	0	0	0	0	0	0	0	0	0	0	0	0	0	0	0	0	0	0	0	0	0	0	0
hsa-miR-567	0	0	0	0	0	0	0	0	0	0	0	0	0	0	0	0	0	0	0	0	0	0	0	0	0	0	0	0	0	0	0	0	0	0	0	0	0	0	0	0	0	0	0	0	0	0	0	0	0
hsa-miR-568	0	0	0	0	0	0	0	0	0	0	0	0	0	0	0	0	0	0	0	0	0	0	0	0	0	0	0	0	0	0	0	0	0	0	0	0	0	0	0	0	0	0	0	0	0	0	0	0	0
hsa-miR-5680	0	0.198112	0	0.186738	0	0.883156	0	0	1.60083	0	0	0	0	0	0	0	0	0	0	0	0	0	0	0	0	0	0	0	0	0	0	0	0	0	0	0.99488	2.18436	0	1.94145	0	2.5541	0	0	0	0	0	0	0	0
hsa-miR-5681a	0	0	0	0	0	0	0	0	0	0	0	0	0	0	0	0	0	0	0	0	0	0	0	0	0	0	0	0	0	0	0	0	0	0	0	0	0	0	0	0	0	0	0	0	0	0	0	0	0
hsa-miR-5681b	0	0	0	0	0	0	0	0	0	0	0	0	0	0	0	0	0	0	0	0	0	0	3.11156	0	0	0	0	0	0	0	0	0	0	0	0	0	0	0	0	0	0	0	0	0	0	0	0	0	0
hsa-miR-5682	0	0	0	0	0	0	0	0	0	0	0	0	0	0	0	0	0	0	0	0	0	0	0	0	0	0	0	0	0	0	0	0	0	0	0	0	0	0	0	0	0	0	0	0	0	0	0	0	0
hsa-miR-5683	2.60126	0	0	0	0	3.21148	3.4267	2.5362	2.91061	0	0	0	0	0	0	0	0	0	0	1.88929	0	1.93108	1.55578	2.22823	0	0	0	0	0	0	0	0	0	0	12.5186	6.63254	6.55307	5.81747	6.37906	9.00787	10.7272	7.3004	0	0	0	0	0	0	0
hsa-miR-5684	0	0.198112	0	0	0	1.48531	0	0	2.83784	0	1.72828	0	0	0	0	0	0	0	0	0	0	0	19.2917	0	0	0	0	0	0	0	0	0	0	0	0	0	0	0	0	0	0	0	0	0	0	0	0	0	0
hsa-miR-5685	0	0	0	0	0	0	0	0	0	0	0	0	0	0	0	0	0	0	0	0	0	0	0	0	0	0.227803	0	0	0	0	0	0	0	0	0	0	0	0	0	0	0	0	0	0	0	0	0	0	0
hsa-miR-5687	0	0	0	0	0	0	0	0	0	0	0	0	0	0	0	0	0	0	0.814472	0	0	0	0	0	0	0	0	0	0	0	0	0	0	0	0	0	0	0	0	0	0	0.663673	0	0	0	0	0	0	0
hsa-miR-5688	0	0	0	0	0	0	0	0	0	0	0	0	0	0	0	0	0	0	0	0	0	0	0	0	0	0	0	0	0	0	0	0	0	0	0	0	0	0	0	0	0	0	0	0	0	0	0	0	0
hsa-miR-5689	0	0	0	0	0	0	0	0	0	0	0	0	0	0	0	0	0	0	0	0	0	0	0	0	0	0	0	0	0	0	0	0	0	0	0	0	0	0	0	0	0	0	0	0	0	0	0	0	0
hsa-miR-569	0	0	0	0	0	0	0	0	0	0	0	0	0	0	0	0	0	0	0	0	0	0	0	0	0	0	0	0	0	0	0	0	0	0	0	0	0	0	0	0	0	0	0	0	0	0	0	0	0
hsa-miR-5690	2.38449	0	4.46614	0	0	1.24445	5.14005	3.55068	3.89293	1.3216	0.768126	1.14116	1.28983	0.660473	1.71585	0.997183	1.51631	3.05891	2.85065	4.40834	0	3.08972	0	0	2.75208	2.84753	1.74651	1.62811	2.57774	2.72363	2.63652	1.91896	0.977469	2.76883	6.88522	5.96928	9.46555	0	5.54701	4.85039	0	3.6502	0	0	1.96484	0	0	0	0
hsa-miR-5691	0	0	0	0	0	0.883156	0	0	0	0	0	0	0	0	0	0	0	0	0	0	0	0	0	0	0	0	0	0	0	0	0	0	0	0	0	0	0	0	0	0	0	0	0	0	0	0	0	0	0
hsa-miR-5692a	0	0	0	0	0	0	0	0	0	0	0	0	0	0	0	0	0	0	0	0	0	0	0	0	0	0	0	0	0	0	0	0	0	0	0	0	0	0	0	0	0	0	0	0	0	0	0	0	0
hsa-miR-5692b	0	0	0	0	0	0	0	0	0	0	0	0	0	0	0	0	0	0	0	0	0	0	0	0	0	0	0	0	0	0	0	0	0	0	0	0	0	0	0	0	0	0	0	0	0	0	0	0	0
hsa-miR-5692c	0	0	0	0	0	0	0	0	0	0	0	0	0	0	0	0	0	0	0	0	0	0	0	0	0	0	0	0	0	0	0	0	0	0	0	0	0	0	0	0	0	0	0	0	0	0	0	0	0
hsa-miR-5693	0	0	0	0	0	0	0	0	0	0	0	0	0	0	0	0	0	0	0	0	0	0	0	0	0	0	0	0	0	0	0	0	0	0	0	0	0	0	0	0	0	0	0	0	0	0	0	0	0
hsa-miR-5694	0	0	0	0	0	0	0	0	0	0	0	0	0	0	0	0	0	3.05891	1.22171	0	0	0	0	0	0	0	0	0	0	0	0	0	0	0	0	0	0	0	0	0	0	0	0	0	0	0	0	0	0
hsa-miR-5695	0	0	0.24472	0	0	0.802869	0	0	0.363826	2.64321	3.84063	0	3.22456	2.42174	4.86158	5.9831	3.99754	0	0	0	2.59302	1.93108	0	0.742743	0.91736	1.36682	1.88085	0.685518	1.34042	1.66932	1.05461	0	1.14038	1.02009	0	0	4.36871	0	1.94145	0	1.53246	1.65918	0	0	0	0	0	0	0
hsa-miR-5696	0	0	0	0	0	0.9233	0	0	0.873182	0	0	0	0	0	0	0	0	0	3.25789	3.77858	0	0	0	0	0	0	0	0	0	0	0	0	0	0	2.50372	4.31115	4.36871	0	0	0	0	2.65469	0	0	0	0	0	0	0
hsa-miR-5697	0	0.132075	0	0	0.122489	0	0	0	0	0	0	0	0	0	0	0	0	0	1.22171	1.25953	0	0	0	0	0	0	0	0	0	0	0	0	0	0	0	0	0	0	0	0	0	0	0	0	0	0	0	0	0
hsa-miR-5698	0	0	0	0	0	0	0	0	0	0	0	0	0	0	0	0	0	0	0	0	0	0	0	0	0	0	0	0	0	0	0	0	0	0	0	0	0	0	0	0	0	0	0	0	0	0	0	0	0
hsa-miR-5699-3p	0	0	0	0	0	5.29894	1.71335	0	3.63826	0	0	0	0	0	0	0	0	6.11781	4.88683	3.4637	0	2.31729	2.17809	0	0	0	0	0	0	0	0	0	0	0	0	3.97952	0	0	0	9.00787	0	6.30489	0	0	0	0	0	0	0
hsa-miR-5699-5p	1.08386	0	0.3059	0	0	3.21148	1.28501	2.5362	0.982329	0	0	0	0	0	0	0	0	17.5887	6.10854	7.24227	11.2364	8.11053	3.11156	2.22823	0	0	0	0	0	0	0	0	0	0	3.12965	1.32651	0	0	2.49616	0	3.57574	2.32286	0	0	0	0	0	0	0
hsa-miR-5700	0	0	0	0	0	0	0	0	0	0	0	0	0	0	0	0	0	0	0	0	0	0	0	0	0	0	0	0	0	0	0	0	0	0	0	0	0	0	0	0	0	0	0	0	0	0	0	0	0
hsa-miR-5701	2.38449	0	0	0	0	4.53621	0	0	8.98649	0	0	0	0.967369	0	0	0	0	9.17672	2.44341	4.72322	0	3.86216	0	1.48549	0.22934	0	0	0	0	0	0.175768	0	0	0	5.00743	5.30603	8.00931	7.4796	3.60556	6.58267	7.6623	3.98204	0	0	0.392968	0	0	0	0.308534
hsa-miR-5702	0	0	0	0	0	0	0	0	0	0	0	0	0	0	0	0	0	0	0	0	0	0	0	0	0	0	0	0	0	0	0	0	0	0	0	0	0	0	0	0	0	0	0	0	0	0	0	0	0
hsa-miR-5703	0	0	0	0	0	0	0	0	0.254678	0	0	0	0	0	0	0	0	0	0	0	0	0	0	0	0	0	0	0	0	0	0	0	0	0	0	0	0	0	0	0	0	0	0	0	0	0	0	0	0
hsa-miR-570-3p	0	0	0	0.186738	0.244978	0.401435	0	0	2.03742	0.755202	0	1.59763	0	1.32095	0.857926	0	0	6.11781	2.44341	2.51905	6.91471	13.9038	0	0	0	0.341704	0	0	0	0	0	0	0	0	0	1.32651	0	0	0	0	0	0	0	0	0	0	0	0	0
hsa-miR-5704	0	0	0	0	0	0	0	0	0	0	0	0	0	0	0	0	0	0	0	0	0	0	0	0	0	0	0	0	0	0	0	0	0	0	0	0	0	0	0	0	0	0	0	0	0	0	0	0	0
hsa-miR-5705	0	0	0	0	0	0	0	0	0	0	0	0	0	0	0	0	0	0	0	0	0	0	0	0	0	0	0	0	0	0	0	0	0	0	0	0	0	0	0	0	0	0	0	0	0	0	0	0	0
hsa-miR-570-5p	0	0	0	0	0	0	0	0	0	0	0	0	0	0	0	0	0	0	0	0	0	0	0	0	0	0	0	0	0	0	0	0	0	0	0	0	0	0	0	0	0	0	0	0	0	0	0	0	0
hsa-miR-5706	0	0	0	0	0.122489	0.441578	0	0	0.291061	0	0	0	0	0	0	0	0	0	0	0	0	0	0	0	0	0	0	0	0.309328	0	0	0	0	0	0	1.32651	0	0	1.38675	0	0	2.32286	0	0	0	0	0	0	0
hsa-miR-5707	0	0	0	0	0	0	0	0	0	0	0	0	0	0	0	0	0	0	0	0	0	0	0	0	0	0	0	0	0	0	0	0	0	0	0	0	0	0	0	0	0	0	0	0	0	0	0	0	0
hsa-miR-5708	0	0	0	0	0	0	0	0	0	0	0	0	0	0	0	0	0	0	0	0	0	0	0	0	0	0	0	0	0	0	0	0	0	0	0	0	0	0	0	0	0	0	0	0	0	0	0	0	0
hsa-miR-571	0	0	0	0	0	0	0	0	0	0	0	0	0	0	0	0	0	0	0	0	0	0	0	0	0	0	0	0	0	0	0	0	0	0	0	0	0	0	0	0	0	0	0	0	0	0	0	0	0
hsa-miR-572	0	0	0	0	0	0	0	0	0	0	0	0	0	0	0	0	0	0	0	0	0	0	0	0	0	0	0	0	0	0	0	0	0	0	0	0	0	0	0	0	0	0	0	0	0	0	0	0	0
hsa-miR-573	0	0	0	0	0	0	0	0	0	0	0	0	0	0	0	0	0	0	0	0	0	0	0	0	0	0	0	0	0	0	0	0	0	0	0	0	0	2.4932	0	0	0	0	0	0	0	0	0	0	0
hsa-miR-5739	0	0	0	0	0	0	0	0	0	0	0	0	0	0	0	0	0	0	0	0	0	0	0	0	0	0	0	0	0	0	0	0	0	0	0	0	0	0	0	0	0	0	0	0	0	0	0	0	0
hsa-miR-574-3p	33.166	177.772	199.569	161.155	153.112	284.537	218.024	201.374	113.113	50.5985	36.294	59.3405	41.1132	23.9972	71.3508	39.3887	66.8554	255.419	550.176	360.854	360.429	437.968	436.552	719.223	15.1364	20.2744	20.4207	7.96915	10.1047	10.1916	11.6007	12.8422	14.0104	12.2411	421.876	564.76	506.771	885.917	478.707	408.472	707.997	421.432	3.23108	0.818073	18.666	10.1844	15.8643	12.1712	9.25602
hsa-miR-574-5p	11.2721	9.37729	17.8646	13.6941	18.1896	38.9392	20.1319	15.7244	19.683	0.944002	0	0	0.644913	0	0	0	0	33.648	83.4833	70.8483	44.9456	39.394	180.782	263.921	0.22934	0	0	0	0	0	0.175768	0	0	0	73.2337	86.5546	72.0838	62.33	79.5996	74.4882	63.8525	85.9457	6.5519	0.46747	14.8345	4.8093	7.62309	15.2714	13.267
hsa-miR-575	0	0	0	0	0	0	0	0	0	0	0	0	0	0	0	0	0	0	0	0	0	0	0	0	0	0	0	0	0	0	0	0	0	0	0	0	0	0	0	0	0	0	0	0	0	0	0	0	0
hsa-miR-576-3p	4.98574	1.38678	1.5295	1.43165	0.979914	2.64947	2.14169	3.55068	4.54782	3.20961	2.11235	3.19526	4.0307	0.550394	1.71585	0	2.20554	35.1774	27.692	32.4328	27.6588	27.4213	3.42271	8.91291	0.22934	0	0	0	0	0	0	0	0	0	11.2667	1.65813	9.46555	9.9728	4.99231	7.62204	6.64066	4.97755	0	0	0	0	0	0	0
hsa-miR-576-5p	4.11866	9.31126	9.66644	12.0135	8.20678	8.38999	17.9902	15.2172	10.5146	101.197	127.317	107.269	224.268	122.848	144.417	189.465	162.934	45.1189	38.2802	22.9863	33.7092	41.3251	19.914	2.97097	48.6201	48.2941	46.6183	23.7361	34.6448	42.963	47.8968	45.7597	41.5424	41.5324	22.5334	23.2139	34.9497	30.7495	15.809	36.0315	20.9436	20.242	0.987273	0.350603	5.10858	1.1316	3.29647	1.26305	2.26258
hsa-miR-577	0	0	0	0	0	40.4245	0	0	0.982329	0	0	0	0	0	0	0	0	7.64727	24.4341	4.09346	7.77905	6.56566	0	0	0	0	0	0	0	0	0	0	0	0	43.815	38.1371	51.6964	30.7495	59.6304	31.1811	56.701	40.8159	0	0	0	0	0	0	0
hsa-miR-578	0	0	0	0	0	0	0	0	0	0	0	0	0	0	0	0	0	0	0	0	0	0	0	0	0	0	0	0	0	0	0	0	0	0	0	0	0	0	0	0	0	0	0	0	0	0	0	0	0
hsa-miR-5787	0	0	0	0	0	0	0	0	0	0	0	0	0	0	0	0	0	0	0	0	0	0	0	0	0	0	0	0	0	0	0	0	0	0	0	0	0	0	0	0	0	0	0	0	0	0	0	0	0
hsa-miR-579-3p	0	0	0	0	0	0.321148	0	0	1.12786	1.1328	0	0	0	0	0	0	0	15.2945	10.9954	7.24227	11.2364	15.0624	0	0.990324	0	0	0	0	0	0	0	0	0	0	0	0	0	0	0	0	0	0	0	0	0	0	0	0	0
hsa-miR-579-5p	0.867086	0.198112	0.12236	0.124492	0	1.32473	0	0	0.618504	0	0.576095	0	0.967369	0	0	0	0	0	0	1.57441	0	1.15865	0	0	0	0	0.268693	0	0	0	0.263652	0	0	0	0	0	0	0	0	0	0	1.32735	0	0	0	0	0	0	0
hsa-miR-580-3p	1.08386	0	0	0	0	1.52545	0	0	2.03742	0	0.384063	0	0	0	0	0	0	5.35309	2.44341	1.57441	0	3.08972	0	0	0	0	0	0	0	0	0	0	0	0	2.50372	0.99488	2.18436	0	2.2188	1.38583	2.04328	1.65918	0	0	0	0	0	0	0
hsa-miR-580-5p	0	0	0	0	0	0	0	0	0	0	0	0	0	0	0	0	0	0	0	0	0	0	0	0	0	0	0	0	0	0	0	0	0	0	0	0	0	0	0	0	0	0	0	0	0	0	0	0	0
hsa-miR-581	0.867086	0	0	0	0	0	0	0	0	0	0	0	0	0	0	0	0	0	0	1.88929	0	0	0	0	0	0	0	0	0	0.175718	0.175768	0	0	0.291456	0	0	0	0	0	0	0	0	0	0	0	0	0	0	0
hsa-miR-582-3p	0.650314	1.51886	1.95776	2.42759	1.40863	73.864	26.5569	29.4199	33.472	0	0	0	0	0	1.28689	0	0	13.7651	14.6605	16.3738	19.8798	29.7386	0.933467	7.67501	0.22934	0	0.40304	0	0	0.702872	0.615189	0	0.814557	0.728639	0	8.29067	17.4749	9.9728	8.59787	6.92913	7.6623	5.64122	0	0	0	0	0	0	0
hsa-miR-582-5p	0	8.25466	6.85216	11.391	7.28811	23.6846	11.1368	8.11584	33.1445	0.944002	0	0.912931	0.967369	0	1.1439	0	0	27.5302	25.6559	12.9101	38.8952	59.4772	22.4032	18.321	0	0	0	0	0	0	0	0	0	0	8.13708	6.63254	10.1937	6.64853	5.82436	5.88976	7.6623	6.30489	0	0	0.294726	1.1316	0	0.803756	0
hsa-miR-583	0	0	0	0	0	0	0	0	0	0	0	0	0	0	0	0	0	0	0	0	0	0	0	0	0	0	0	0	0	0	0	0	0	0	0	0	0	0	0	0	0	0	0	0	0	0	0	0	0
hsa-miR-584-3p	0	0.72641	0.24472	0.560213	0.183734	0	0	0	1.16424	9.25122	8.44939	12.781	6.77158	5.94426	6.72042	6.98028	10.3385	0	0	0	0	0	0	0	0.34401	0	0.40304	0	0	0.175718	0.351537	0.73806	0	0.582911	0	0	0	0	0	0	0	0	0.179504	0	1.57187	0.8487	1.23618	0.229645	0.205689
hsa-miR-584-5p	11.4889	19.0848	25.2062	19.8564	20.8844	12.7656	5.14005	10.1448	7.67672	108.56	90.0628	141.504	69.0057	27.1895	58.9109	49.8592	79.9508	6.88254	10.5881	9.76132	5.18603	8.88296	12.1351	19.5589	45.0653	49.547	44.4687	20.7369	24.8494	35.5829	39.7236	41.479	39.9133	35.2661	31.2965	30.8413	45.8715	21.6077	26.3483	45.0393	32.1817	41.4796	31.5927	3.62289	212.399	125.891	167.502	134.801	34.2473
hsa-miR-585-3p	0	9.83955	7.3416	11.391	7.28811	2.24803	0	0	1.56445	0	0	0	0	0	0	0	0	5.35309	4.07236	11.9655	3.45735	3.86216	9.33467	30.9476	0	0	0	0	0	0	0	0	0	0	5.00743	4.64277	5.82495	10.8039	12.2034	11.7795	29.6276	14.9326	0	0	0	0	0	0	0
hsa-miR-585-5p	0	1.12263	0	1.05818	0	0.722582	0	0	0.436591	0	0	0	0	0	0	0	0	0	0	0	0	0	0.933467	10.8936	0	0	0	0	0	0	0	0	0	0	0	1.65813	0	5.81747	1.38675	3.81102	5.61902	1.65918	0	0	0	0	0	0	0
hsa-miR-586	0	0	0	0	0	0	0	0	0	0	0	0	0	0	0	0	0	0	0	0	0	0	0	0	0	0	0	0	0	0	0	0	0	0	0	0	0	0	0	0	0	0	0	0	0	0	0	0	0
hsa-miR-587	0	0	0	0	0	0	0	0	0	0	0	0	0	0	0	0	0	0	0	0	0	0	0	0	0	0	0	0	0	0	0	0	0	0	0	0	0	0	0	0	0	0	0	0	0	0	0	0	0
hsa-miR-588	0	0	0	0	0	0	0	0	0	0	0	0	0	0	0	0	0	0	0	0	0	0	0	0	0	0	0	0	0	0	0	0	0	0	0	0	0	0	0	0	0	0	0	0	0	0	0	0	0
hsa-miR-589-3p	0	3.43394	5.44502	5.91336	3.85841	3.57277	0	0	1.6736	2.26561	1.72828	2.51056	1.61228	0.99071	3.71768	3.98873	3.03262	3.82363	4.88683	5.35298	6.05037	5.79323	6.84543	1.48549	0.80269	1.13901	1.47781	0.428449	0.412438	0.439295	0.175768	0.590448	0.651646	0	5.00743	2.32139	8.00931	5.81747	6.10171	5.88976	5.61902	3.6502	0	0	0	0	0	0.229645	0.308534
hsa-miR-589-5p	5.20251	18.8206	10.3394	9.95934	6.06322	21.3162	41.9771	55.2892	7.9314	23.6001	19.7793	23.9644	23.3781	14.3103	18.8744	38.3916	40.2511	8.41199	4.07236	3.77858	10.3721	8.11053	18.9805	17.3307	14.1044	15.7184	16.3903	8.99743	9.7954	13.5303	15.3797	14.6136	14.662	15.01	35.678	44.1064	40.7747	38.2291	31.8953	47.4645	32.1817	33.1837	3.14132	1.05181	17.7818	4.5264	17.9246	1.49269	6.6849
hsa-miR-590-3p	22.761	1.32075	1.34596	2.48983	0.979914	8.43013	11.5651	9.63756	75.3119	0	0.576095	0	0	0	0	0	0	290.596	221.536	122.489	296.468	329.828	9.02352	11.6363	0	0	0	0	0	0	0	0	0	0	22.5334	11.9386	17.4749	9.14173	21.6333	12.4724	13.2813	12.9416	0	0	0	0	0	0	0
hsa-miR-590-5p	0	3.63205	4.16024	4.91742	3.18472	0.762726	0	0	36.9283	0	0	0.456466	0	0	0	0	0	35.9421	42.3525	29.5989	25.0658	35.5318	43.873	0.742743	0	0	0	0	0	0	0	0	0	0	2.50372	0.663254	2.18436	2.4932	1.1094	1.38583	1.02164	0	0	0	0	0	0	0	0
hsa-miR-591	0	0	0	0	0	0	0	0	0	0	0	0	0	0	0	0	0	0	0	0	0	0	0	0	0	0	0	0	0	0	0	0	0	0	0	0	0	0	0	0	0	0	0	0	0	0	0	0	0
hsa-miR-592	0	0	0.36708	0.497967	0.367468	2.64947	10.2801	11.6665	1.78275	0	0	0	0	0	0	0	0	52.0014	60.6781	37.156	36.3022	43.2561	0	0	0	0	0	0	0	0	0	0	0	0	11.8927	6.63254	5.82495	8.31067	12.2034	1.73228	2.04328	3.98204	0	0	0	0	0	0	0
hsa-miR-593-3p	0	0	0	0	0	0	0	0	0	0	0	0	0	0	0	0	0	0	0	0	0	0	0	0	0	0	0	0	0	0	0	0	0	0	0	0	0	0	0	0	0	0	0	0	0	0	0	0	0
hsa-miR-593-5p	0	0	0	0	0	0	0	0	0	0	0	0	0	0	0	0	0	0	0	0	0	0	0	0	0	0	0	0	0	0	0	0	0	0	0	0	0	0	0	0	0	0	0	0	0	0	0	0	0
hsa-miR-595	0	0	0	0	0	0	0	0	0	0	0	0	0	0	0	0	0	0	0	0	0	0	0	0	0	0	0	0	0	0	0	0	0	0	0	0	0	0	0	0	0	0	0	0	0	0	0	0	0
hsa-miR-596	0	0	0	0	0	0	0	0	0	0	0	0	0	0	0	0	0	0	0	0	0	0	0	0	0	0	0	0	0	0	0	0	0	0	0	0	0	0	0	0	0	0	0	0	0	0	0	0	0
hsa-miR-597-3p	0	0	0	0	0	0	0	0	0.363826	1.6992	0.768126	0.684698	0	0.330237	0.57195	1.49578	1.10277	0	0	0	0	2.31729	0	0	0.34401	0	0	0	0	0	0.439421	0.442836	0	0	0	0	2.18436	0	0	0	0	0	0	0	0	0	0	0	0
hsa-miR-597-5p	0	0	0	0	0	1.32473	0	0	0.582121	0	0	0	0	0	0	0	0	3.05891	4.47959	7.55715	0	6.56566	0	0.990324	0	0	0	0	0	0	0	0	0	0	0	0	0	0	1.94145	0	0	0	0	0	0	0	0	0	0
hsa-miR-598-3p	3.46834	74.2259	36.2797	50.0457	41.2176	26.7757	6.8534	4.56516	196.866	1.3216	0	1.82586	0.967369	0	0	0	0.827077	63.4723	68.4156	48.8066	56.182	67.2015	27.3817	36.8896	0.57335	1.36682	0.671733	0	0.824876	0.439295	0.351537	0.73806	0.814557	0.728639	145.216	147.574	153.633	152.916	208.29	126.457	162.952	110.833	0.538513	0	1.76836	1.1316	0.824118	1.14822	0.822757
hsa-miR-598-5p	0	0	0	0	0	0	0	0	0	0	0	0	0	0	0	0	0	0	0	0	0	0	0	0	0	0	0	0	0	0	0	0	0	0	0	0	0	0	0	0	0	0	0	0	0	0	0	0	0
hsa-miR-599	0	0	0	0	0	0	0	0	0	0	0	0	0	0	0	0	0	0	0	0	0	0	0	0	0	0	0	0	0	0	0	0	0	0	0	0	0	0	0	0	0	0	0	0	0	0	0	0	0
hsa-miR-600	0	0	0	0	0	0	1.28501	0	0.472973	0	0	0	0	0	0	0	0	0	0	0	0	0	0	0	0	0	0	0	0	0	0	0	0	0	0	0	0	0	0	0	0	0	0	0	0	0	0	0	0
hsa-miR-601	0	0	0	0	0	0	0	0	0	0	0	0	0	0	0	0	0	0	0	0	0	0	0	0	0	0	0	0	0	0	0	0	0	0	0	0	0	0	0	0	0	0	0	0	0	0	0	0	0
hsa-miR-602	0	0	0	0	0	0	0	0	0	0	0	0	0	0	0	0	0	0	0	0	0	0	0	0	0	0	0	0	0	0	0	0	0	0	0	0	0	0	0	0	0	0	0	0	0	0	0	0	0
hsa-miR-603	0	0	0	0	0	0	0	0	0.254678	0	0	0	0	0	0	0	0	0	0	0	0	0	0	0	0	0	0	0	0	0	0	0	0	0	0	0	0	0	0	0	0	0	0	0	0	0	0	0	0
hsa-miR-604	0	0	0	0	0	0	0	0	0	0	0	0	0	0	0	0	0	0	0	0	0	0	0	0	0	0	0	0	0	0	0	0	0	0	0	0	0	0	0	0	0	0	0	0	0	0	0	0	0
hsa-miR-605-3p	2.38449	0.462261	0.42826	0.622459	0.367468	0	0	0	0	0	0	0.456466	0	0.550394	0	0	0.413539	0	0	0.944644	0	0	0	0	0	0	0	0	0	0	0	0	0	0	0	0	0	0	1.1094	0	0	0	0	0	0	0	0	0	0
hsa-miR-605-5p	0	0.396224	0	0.435721	0	1.40502	0	0	0	0	0	0	0	0	0.428963	0	0	2.29418	0.814472	1.57441	3.45735	0	0	0	0	0	0	0	0	0	0	0	0	0	0	0	0	0	0	2.77165	3.06492	0	0	0	0	0	0	0	0
hsa-miR-606	0	0	0	0	0	0	0	0	0	0	0	0	0	0	0	0	0	0	0	0	0	0	0	0	0	0	0	0	0	0	0	0	0	0	0	0	0	0	0	0	0	0	0	0	0	0	0	0	0
hsa-miR-6068	0	0	0	0	0	0	0	0	0	0	0	0	0	0	0	0	0	0	0	0	0	0	0	0	0	0	0	0	0	0	0	0	0	0	0	0	0	0	0	0	0	0	0	0	0	0	0	0	0
hsa-miR-6069	0	0	0	0	0	0	0	0	0	0	0	0	0	0	0	0	0	0	0	0	0	0	0	0	0	0	0	0	0	0	0	0	0	0	0	0	0	0	0	0	0	0	0	0	0	0	0	0	0
hsa-miR-607	0	0	0	0	0	0	0	0	0	0	0	0	0	0	0	0	0	0	0	0	0	0	0	0	0	0	0	0	0	0	2.10922	0	0	0	0	0	0	0	0	0	0	0	0	0	0	0	0	0	0
hsa-miR-6070	0	0	0	0	0	0	0	0	0	0	0	0	0	0	0	0	0	0	0	0	0	0	0	0	0	0	0	0	0	0	0	0	0	0	0	0	0	0	0	0	0	0	0	0	0	0	0	0	0
hsa-miR-6071	0	0	0	0	0	0	0	0	0	0	0	0	0	0	0	0	0	0	0	0	0	0	0	0	0	0	0	0	0	0	0	0	0	0	0	0	0	0	0	0	0	0	0	0	0	0	0	0	0
hsa-miR-6072	0	0	0	0	0	0	0	0	0	0	0	0	0	0	0	0	0	0	0	0	0	0	0	0	0	0	0	0	0	0	0	0	0	0	0	0	0	0	0	0	0	0	0	0	0	0	0	0	0
hsa-miR-6073	0	0	0	0	0	0	0	0	0	0	0	0	0	0	0	0	0	0	0	0	0	0	0	0	0	0	0	0	0	0	0	0	0	0	0	0	0	0	0	0	0	0	0	0	0	0	0	0	0
hsa-miR-6074	0	0	0	0	0	0	0	0	0	0	0	0	0	0	0	0	0	0	0	0	0	0	0	0	0	0	0	0	0	0	0	0	0	0	0	0	0	0	0	0	0	0	0	0	0	0	0	0	0
hsa-miR-6075	0	0	0	0	0	0	0	0	0	0	0	0	0	0	0	0	0	0	0	0	0	0	0	0	0	0	0	0	0	0	0	0	0	0	0	0	0	0	0	0	0	0	0	0	0	0	0	0	0
hsa-miR-6076	0	0	0	0	0	0	0	0	0	0	0	0	0	0	0	0	0	0	0	0	0	0	0	0	0	0	0	0	0	0	0	0	0	0	0	0	0	0	0	0	0	0	0	0	0	0	0	0	0
hsa-miR-6077	0	0	0	0	0	0	0	0	0	0	0	0	0	0	0	0	0	0	0	0	0	0	0	0	0	0	0	0	0	0	0	0	0	0	0	0	0	0	0	0	0	0	0	0	0	0	0	0	0
hsa-miR-6078	0	0	0	0	0	0	0	0	0	0	0	0	0	0	0	0	0	0	0	0	0	0	0	0	0	0	0	0	0	0	0	0	0	0	0	0	0	0	0	0	0	0	0	0	0	0	0	0	0
hsa-miR-6079	0	0	0	0	0	0	0	0	0	0	0	0	0	0	0	0	0	0	0	0	0	0	0	0	0	0	0	0	0	0	0	0	0	0	0	0	0	0	0	0	0	0	0	0	0	0	0	0	0
hsa-miR-608	0	0	0	0	0	0	0	0	0	0	0	0	0	0	0	0	0	0	0	0	0	0	0	0	0	0	0	0	0	0	0	0	0	0	0	0	0	0	0	0	0	0	0	0	0	0	0	0	0
hsa-miR-6080	0	0	0	0	0	0	0	0	0	0	0	0	0	0	0	0	0	0	0	0	0	0	0	0	0	0	0	0	0	0	0	0	0	0	0	0	0	0	0	0	0	0	0	0	0	0	0	0	0
hsa-miR-6081	0	0	0	0	0	0	0	0	0	0	0	0	0	0	0	0	0	0	0	0	0	0	0	0	0	0	0	0	0	0	0	0	0	0	0	0	0	0	0	0	0	0	0	0	0	0	0	0	0
hsa-miR-6082	0	0	0	0	0	0	0	0	0	0	0	0	0	0	0	0	0	0	0	0	0	0	0	0	0	0	0	0	0	0	0	0	0	0	0	0	0	0	0	0	0	0	0	0	0	0	0	0	0
hsa-miR-6083	0	0	0	0	0	0	0	0	0	0	0	0	0	0	0	0	0	0	0	0	0	0	0	0	0	0	0	0	0	0	0	0	0	0	0	0	0	0	0	0	0	0	0	0	0	0	0	0	0
hsa-miR-6084	0	0	0	0	0	0	0	0	0	0	0	0	0	0	0	0	0	0	0	0	0	0	0	0	0	0	0	0	0	0	0	0	0	0	0	0	0	0	0	0	0	0	0	0	0	0	0	0	0
hsa-miR-6085	0	0	0	0	0	0	0	0	0	0	0	0	0	0	0	0	0	0	0	0	0	0	0	0	0	0	0	0	0	0	0	0	0	0	0	0	0	0	0	0	0	0	0	0	0	0	0	0	0
hsa-miR-6086	0	0	0	0	0	0	0	0	0	0	0	0	0	0	0	0	0	0	0	0	0	0	0	0	0	0	0	0	0	0	0	0	0	0	0	0	0	0	0	0	0	0	0	0	0	0	0	0	0
hsa-miR-6087	0	1.58489	1.2236	1.55615	1.1024	8.14912	3.85504	2.02896	2.72869	0	0	0	0	0	0	0	0	208.006	49.6828	32.4328	306.84	165.686	0	3.9613	0	0	0	0	0	0	0	0	0	0	13.7704	4.64277	13.1061	22.4388	1.6641	6.92913	10.2164	10.2869	0	0	1.76836	0	0	0	0
hsa-miR-6088	0	0	0	0	0	0	0	0	0	0	0	0	0	0	0	0	0	0	0	0	0	0	0	0	0	0	0	0	0	0	0	0	0	0	0	0	0	0	0	0	0	0	0	0	0	0	0	0	0
hsa-miR-6089	0	0	0	0	0	0	0	0	0	0	0	0	0	0	0	0	0	0	0	0	0	0	0	0	0	0	0	0	0	0	0	0	0	0	0	0	0	0	0	0	0	0	0	0	0	0	0	0	0
hsa-miR-609	0	0	0	0	0	0	0	0	0	0	0	0	0	0	0	0	0	0	0	2.51905	0	0	0	0	0	0	0	0	0	0	0	0	0	0	0	0	0	0	0	3.81102	0	0	0	0	0	0	0	0	0
hsa-miR-6090	0	0	0	0	0	0	0	0	0	0	0	0	0	0	0	0	0	0	0	0	0	0	0	0	0	0	0	0	0	0	0	0	0	0	0	0	0	0	0	0	0	0	0	0	0	0	0	0	0
hsa-miR-610	0	0	0	0	0	0	0	0	0	0	0.960158	0	0	0.440316	0.428963	0	0.689231	0	0	0	0	0	0	0	0	0	0	0	0	0	0	0	0	0	0	0	0	0	0	0	0	0	0	0	0	0	0	0	0
hsa-miR-611	0	0	0	0	0	0	0	0	0	0	0	0	0	0	0	0	0	0	0	0	0	0	0	0	0	0	0	0	0	0	0	0	0	0	0	0	0	0	0	0	0	0	0	0	0	0	0	0	0
hsa-miR-612	0	0	0	0	0	0.9233	0	0	0	0	0	0	0	0	0	0	0	0	0	3.14881	0	0	0	0	0	0	0	0	0	0	0	0	0	0	6.25929	0	3.64059	0	1.94145	0	0	0	0	0	0	0	0	0	0
hsa-miR-6124	0	0	0	0	0	0	0	0	0	0	0	0	0	0	0	0	0	0	0	0	0	0	0	0	0	0	0	0	0	0	0	0	0	0	0	0	0	0	0	0	0	0	0	0	0	0	0	0	0
hsa-miR-6125	0	0	0	0	0	0	0	0	17.4636	0	0	0	0	0	0	0	0	0	0	0	0	0	0	0	0	0	0	0	0	0	0	0	0	0	0	40.4585	0	0	0	0	0	0	0	0	0	0	0	0	0
hsa-miR-6126	0	0	0	0	0	0	0	0	0	0	0	0	0	0	0	0	0	0	0	0	0	0	0	0	0	0	0	0	0	0	0	0	0	0	0	0	0	0	0	0	0	0	0	0	0	0	0	0	0
hsa-miR-6127	0	0	0	0	0	0	0	0	0	0	0	0	0	0	0	0	0	0	0	0	0	0	0	0	0	0	0	0	0	0	0	0	0	0	0	0	0	0	0	0	0	0	0	0	0	0	0	0	0
hsa-miR-6128	0	0	0	0	0	0	0	0	0	0	0	0	0	0	0	0	0	0	0	0	0	0	0	0	0	0	0	0	0	0	0	0	0	0	0	0	0	0	0	0	0	0	0	0	0	0	0	0	0
hsa-miR-6129	0	0	0	0	0	0	0	0	0	0	0	0	0	0	0	0	0	0	0	0	0	0	0	0	0	0	0	0	0	0	0	0	0	0	0	0	0	0	0	0	0	0	0	0	0	0	0	0	0
hsa-miR-613	0	0	0	0	0	0	0	0	0	0	0	0	0	0	0	0	0	0	0	0	0	0	0	0	0	0	0	0	0	0	0	0	0	0	0	0	0	0	0	0	0	0	0	0	0	0	0	0	0
hsa-miR-6130	0	0	0	0	0	0	0	0	0	0	0	0	0	0	0	0	0	0	0	0	0	0	0	0	0	0	0	0	0	0	0	0	0	0	0	0	0	0	0	0	0	0	0	0	0	0	0	0	0
hsa-miR-6131	0	0	0	0	0	0	0	0	0	0	0	0	0	0	0	0	0	0	0	0	0	0	0	0	0	0	0	0	0	0	0	0	0	0	0	0	0	0	0	0	0	0	0	0	0	0	0	0	0
hsa-miR-6132	0	0.528298	0.3059	0	0.367468	0	0	0	0	0	0	0	0	0	0	0	0	0	0	0	0	0	0	0	0	0	0	0	0	0	0	0	0	0	0	0	0	0	0	0	0	0	0	0	0	0	0	0	0
hsa-miR-6133	0	0	0	0	0	0	0	0	0	0	0	0	0	0	0	0	0	0	0	0	0	0	0	0	0	0	0	0	0	0	0	0	0	0	0	0	0	0	0	0	0	0	0	0	0	0	0	0	0
hsa-miR-6134	0	0	0	0	0	0	0	0	0	0	0	0	0	0	0	0	0	0	0	0	0	0	0	0	0	0	0	0	0	0	0	0	0	0	0	0	0	0	0	0	0	0	0	0	0	0	0	0	0
hsa-miR-614	0	0	0	0	0	0	0	0	0	0	0	0	0	0	0	0	0	0	0	0	0	0	0	0	0	0	0	0	0	0	0	0	0	0	0	0	0	0	0	0	0	0	0	0	0	0	0	0	0
hsa-miR-615-3p	50.0742	0	0	0	0	1.68603	0	0	0.181913	0	0	0	0	0	0	0	0	0	0	6.29763	0	0	171.758	205.245	0	0	0	0	0	0	0	0	0	0	5.00743	3.31627	6.55307	5.81747	4.71496	3.46457	5.61902	5.64122	0	0	0	0	0	0	0
hsa-miR-615-5p	0	0	0	0	0	0	0	0	0	0	0	0	0	0	0	0	0	0	0	0	0	0	15.8689	23.5202	0	0	0	0	0	0	0	0	0	0	0	0	0	0	0	0	0	0	0	0	0	0	0	0	0
hsa-miR-616-3p	0	0	0	0.248983	0	1.2043	0	0	0.472973	0	0	0.912931	0	0	0.57195	0	0	0	0.814472	1.88929	6.91471	0	0	1.2379	0	0	0	0	0	0	0	0	0	0	0	0	0	0	0	0	0	1.32735	0	0	0	0	0	0	0.205689
hsa-miR-6165	0	0	0	0	0	0	0	0	0	0	0	0	0	0	0	0	0	0	0	0	0	0	0	0	0	0	0	0	0	0	0	0	0	0	0	0	0	0	0	0	0	0	0	0	0	0	0	0	0
hsa-miR-616-5p	2.16771	0.462261	0.12236	0.435721	0.183734	3.17133	2.14169	3.04344	0.691269	5.66401	3.45657	6.16228	7.25527	3.6326	6.29145	3.49014	5.23816	17.5887	15.475	15.1143	16.4224	16.2211	0	2.47581	2.86675	1.82242	1.88085	0.856898	1.64975	1.84504	2.02133	1.1809	1.14038	1.60301	11.2667	6.30091	5.09683	9.14173	8.32052	6.58267	9.19476	7.63224	0	0	0	0	0	0	0
hsa-miR-617	0	0	0	0	0	0	0	0	0	0	0	0	0	0	0	0	0	0	0	0	0	0	0	0	0	0	0	0	0	0	0	0	0	0	0	0	0	0	0	0	0	0	0	0	0	0	0	0	0
hsa-miR-618	5.41929	0	0.48944	0.684704	0.367468	0	8.56675	8.11584	5.74845	8.49602	8.44939	13.4657	17.5739	2.86205	10.4381	18.4479	7.30585	9.17672	4.88683	9.76132	5.18603	5.79323	0	3.9613	0.22934	0.341704	0.268693	0.17138	0.206219	0	0.351537	0.442836	0	0	8.13708	1.32651	4.36871	0	4.43761	7.9685	0	1.65918	0	0	0.392968	0	0	0	0
hsa-miR-619-3p	0	0	0	0	0	0	0	0	0	0	0	0	0	0	0	0	0	0	0	0	0	0	0	0	0	0	0	0	0	0	0	0	0	0	0	0	0	0	0	0	0	0	0	0	0	0	0	0	0
hsa-miR-619-5p	2.60126	1.58489	1.59068	1.4939	1.59236	5.70037	0	0	2.80146	0	0	0	0	0	0	0	0	37.4716	21.9907	21.7268	58.775	30.8972	7.7789	37.3847	0	0	0	0	0	0	0	0	0	0	41.3113	5.30603	20.3873	16.6213	6.37906	12.4724	18.9003	5.97306	0	0	0	0	0	0	0
hsa-miR-620	0	0	0	0	0	0	0	0	0	0	0	0	0	0	0	0	0	0	0	0	0	0	0	0	0	0	0	0	0	0	0	0	0	0	0	0	0	0	0	0	0	0	0	0	0	0	0	0	0
hsa-miR-621	0	0	0	0	0	0	0	0	0	0	0	0	0	0	0	0	0	0	0	0	0	0	0	0	0	0	0	0	0	0	0	0	0	0	0	0	0	0	0	0	0	0	0	0	0	0	0	0	0
hsa-miR-622	0	0	0	0	0	0	0	0	0	0	0	0	0	0	0	0	0	0	0	0	0	0	0.933467	1.48549	0	0	0	0	0	0	0	0	0	0	0	0	0	0	0	0	0	0	0	0	0	0	0	0	0
hsa-miR-623	0	0	0	0	0	0	0	0	0	0	0	0	0	0	0	0	0	0	0	0	0	0	0	0	0	0	0	0	0	0	0	0	0	0	0	0	0	0	0	0	0	0	0	0	0	0	0	0	0
hsa-miR-624-3p	0	0	0	0.186738	0	0	0	0	1.01871	0	0	0	0	0	0	0	0	6.88254	2.03618	1.88929	0	4.63459	0	0	0	0	0	0	0	0	0	0	0	0	0	0	0	0	1.1094	0	3.06492	0	0	0	0	0	0	0	0
hsa-miR-624-5p	1.73417	1.12263	1.10124	1.55615	1.34738	0.602152	1.71335	2.5362	1.23701	7.55202	5.95298	5.47759	7.4165	4.183	6.57743	0	2.48123	15.2945	19.9546	17.3185	19.0154	20.8556	0	4.45646	0	0	0	0	0	0	0.175768	0	0	0	0	1.32651	2.91248	0	1.38675	5.19685	2.5541	1.32735	0.179504	0	2.75078	0.8487	0.618089	0.229645	0.308534
hsa-miR-625-3p	9.32117	10.2358	9.66644	14.0053	10.6566	15.4552	2.57002	1.01448	7.56757	96.477	64.5226	60.7099	42.2418	25.098	63.3435	44.3747	48.6597	98.6497	99.7728	178.223	127.922	113.161	12.1351	11.8839	2.40807	2.39193	3.35867	2.05655	3.40261	3.51436	4.21844	2.5094	1.95494	2.76883	8.13708	9.61718	13.8343	9.14173	6.93376	8.66141	10.2164	2.65469	2.42331	0.701205	0.687694	0	0.618089	0	0
hsa-miR-625-5p	2.60126	2.50942	2.81428	4.10823	2.93974	18.5061	2.14169	2.02896	4.69335	26.2433	20.5474	21.6821	14.5105	12.6591	21.4481	23.9324	18.3335	88.7083	117.284	240.569	75.1975	117.796	32.9825	11.1411	1.1467	1.70852	0.940426	0.771208	1.1342	1.66932	0.966725	1.32851	1.95494	1.02009	9.38894	11.2753	16.0186	14.1281	9.15257	14.5512	8.17312	6.96857	0.807769	0	0.392968	0	0	0.918578	0.308534
hsa-miR-626	0	0	0	0	0	0	0	0	0	0	0	0	0	0	0	0	0	0	0	0	0	0	0	0	0	0	0	0	0	0	0	0	0	0	0	0	0	0	0	0	0	0	0	0	0	0	0	0	0
hsa-miR-627-3p	0	0.132075	0	0	0	1.00359	0.856675	1.52172	1.4553	9.81762	3.26454	4.33642	4.19193	2.42174	1.85884	0	1.792	6.88254	1.62894	2.20417	0	3.47594	1.86693	1.48549	1.37604	0.455605	0.40304	0.428449	0.412438	1.31788	0.878841	0.885672	0.977469	0.437183	2.50372	1.98976	9.46555	0	3.05086	3.81102	0	1.99102	0	0	0.294726	0	0	0	0
hsa-miR-627-5p	1.95094	0	0	0	0	2.36846	0	0	38.3836	3.39841	1.92032	1.3694	2.25719	1.32095	0.57195	0	0	22.9418	13.846	29.9137	28.5232	27.8075	16.1801	6.18952	0.22934	0	0.268693	0.257069	0	0.790731	0	0	0	0	6.25929	2.65301	7.28119	7.4796	5.26966	6.58267	8.68394	5.30938	0	0	0	0	0	0	0
hsa-miR-628-3p	11.0553	1.84904	1.16242	1.86738	1.46987	4.69679	12.4218	6.59412	1.70998	2.07681	2.88047	2.96703	2.90211	1.76126	4.14664	1.49578	4.13539	16.824	13.846	22.9863	16.4224	18.5383	7.15658	7.17985	0.80269	0.683408	0.537386	0.342759	0.515547	0.439295	0.527305	0	0.325823	0.582911	9.38894	6.63254	13.8343	11.6349	10.8167	9.70078	9.70558	12.278	0	0	0.785936	0	0.618089	0.459289	0
hsa-miR-628-5p	22.761	1.98112	1.8354	3.36128	2.38854	6.02152	11.9934	12.1738	27.2142	0	0.768126	0	0.644913	0	0	0	0.827077	77.2374	70.4518	48.8066	64.8254	95.3952	26.1371	11.1411	0	0	0	0	0	0.439295	0.263652	0	0	0	29.4187	21.8874	29.1248	28.2563	40.4932	28.4094	30.6492	39.8204	0	0	0.49121	0	0.618089	0	0
hsa-miR-629-3p	0	1.71697	0.97888	1.99187	1.77609	3.13119	0	0	1.70998	3.58721	4.22469	4.79289	2.25719	1.87134	3.71768	2.49296	4.41108	2.29418	3.66512	7.87203	0	4.63459	3.11156	2.47581	0.34401	0	0.537386	0	0	0	0.263652	0	0	0	0	3.31627	11.6499	0	0.832052	2.77165	3.57574	0.663673	0	0	0	0	0	0	0
hsa-miR-629-5p	8.23731	107.443	79.534	120.819	74.2285	11.5613	11.5651	7.6086	4.40229	88.7362	54.1529	89.0108	34.1804	18.163	65.3453	30.9127	42.8702	23.7065	45.2032	43.7685	36.3022	55.615	38.8945	50.0114	2.63741	3.87264	4.0304	3.17052	4.22749	6.67728	5.88824	3.54269	4.2357	5.53766	13.7704	12.9334	19.6592	8.31067	10.5393	11.4331	10.7272	8.95959	7.00066	0.93494	11.789	4.5264	5.35677	9.30061	9.6674
hsa-miR-630	0	0	0	0	0	0	0	0	0	0	0	0	0	0	0	0	0	0	0	0	0	0	0	0	0	0	0	0	0	0	0	0	0	0	0	0	0	0	0	0	0	0	0	0	0	0	0	0	0
hsa-miR-631	0	0	0	0	0	0	0	0	0	0	0	0	0	0	0	0	0	0	0	0	0	0	0	0	0	0	0	0	0	0	0	0	0	0	0	0	0	0	0	0	0	0	0	0	0	0	0	0	0
hsa-miR-632	0	0	0	0	0	0	0	0	0	0	0	0	0	0	0	0	0	0	0	0	0	0	0	0	0	0	0	0	0	0	0	0	0	0	0	0	0	0	0	0	0	0	0	0	0	0	0	0	0
hsa-miR-633	0	0	0	0	0	0	0	0	0	0	0	0	0	0	0	0	0	0	0	0	0	0	0	0	0	0	0	0	0	0	0	0	0	0	0	0	0	0	0	0	0	0	0	0	0	0	0	0	0
hsa-miR-634	0	0	0	0	0	0	0	0	0	0	0	0	0	0	0	0	0	0	0	0	0	0	0	0	0	0	0	0	0	0	0	0	0	0	0	0	0	0	0	0	0	0	0	0	0	0	0	0	0
hsa-miR-635	0	0	0	0	0	0	0	0	0	0	0	0	0	0	0	0	0	0	0	0	0	0	0	0	0	0	0	0	0	0	0	0	0	0	0	0	0	0	0	0	0	0	0	0	0	0	0	0	0
hsa-miR-636	0	0	0.24472	0	0	10.076	0	0	1.30977	12.0832	8.06533	12.5528	6.44913	7.15513	13.5838	9.97183	12.4062	0	0	0	0	0	5.91196	2.47581	12.155	11.9596	9.13557	9.08312	8.04254	11.9488	10.8976	9.89	8.14557	10.4924	0	7.62742	0	0	0	24.5984	13.2813	5.30938	5.29537	1.28554	11.3961	10.4673	9.88942	8.61167	14.7068
hsa-miR-637	0	0	0	0	0	0	0	0	0	0	0	0	0	0	0	0	0	0	0	0	0	0	0	0	0	0	0	0	0	0	0	0	0	0	0	0	0	0	0	0	0	0	0	0	0	0	0	0	0
hsa-miR-638	0	0	0	0	0	0	0	0	0	0	0	0	0	0	0	0	0	0	0	0	0	0	0	0	0	0	0	0	0	0	0	0	0	0	0	0	0	0	0	0	0	0	0	0	0	0	0	0	0
hsa-miR-639	0	0	0	0	0	1.32473	0	0	0	0	0	0	0	0	0	0	0	0	0	0	0	0	0	0	0	0	0	0	0	0	0	0	0	0	0	0	0	0	0	0	0	0	0	0	0	0	0	0	0
hsa-miR-640	0	0	0	0	0	0	0	0	0	0	0	0	0	0	0	0	0	0	0	0	0	0	0	0	0	0	0	0	0	0	0	0	0	0	0	0	0	0	0	0	0	0	0	0	0	0	0	0	0
hsa-miR-641	4.5522	1.25471	1.5295	0.74695	1.83734	5.25879	7.28173	7.10136	0.800417	3.20961	5.37688	2.51056	4.67562	1.87134	4.71859	2.49296	4.27323	6.88254	14.2533	14.7994	12.9651	21.2419	0	3.46613	1.03203	0.91121	0	1.45673	0.721766	0.790731	0.878841	0.73806	0.488734	0	10.6408	6.30091	11.6499	7.4796	6.93376	8.31496	7.6623	7.3004	0	0	0.589452	0.8487	0	0	0
hsa-miR-642a-3p	0	0	0.36708	0.373475	0.306223	1.2043	0	0	0.654886	0	0	0	0	0	0	0	0.413539	2.29418	3.25789	4.09346	3.45735	5.79323	0	2.22823	0	0	0	0	0	0	0	0	0	0	0	0	0	0	0	2.07874	0	0	0	0	0	0	0	0	0
hsa-miR-642a-5p	0	0	0	0	0	3.77349	0	0	1.60083	0.377601	0.768126	1.59763	1.45105	0.99071	0.57195	1.49578	2.75692	6.11781	10.5881	18.8929	7.77905	8.88296	7.7789	0	0.22934	0	0	0	0.206219	0	0	0	0	0	0	0.663254	0	0	0	4.50393	2.5541	0.663673	0	0	0	0	0	0	0
hsa-miR-642b-3p	0	0	0	0	0	0	0	0	0	0	0	0	0	0	0	0	0	0	0	0	0	0	0	0	0	0	0	0	0	0	0	0	0	0	0	0	0	0	0	0	0	0	0	0	0	0	0	0	0
hsa-miR-642b-5p	0	0	0	0	0	0	0	0	0	0	0	0	0	0.330237	0	0	0	0	0	0	0	0	0	0	0	0	0	0	0	0	0	0	0	0	0	0	0	0	0	0	0	0	0	0	0	0	0	0	0
hsa-miR-643	0	0.198112	0.12236	0.248983	0.306223	0.883156	0	0	0.654886	1.1328	1.34422	0.684698	0.806141	0.440316	0.428963	0	0	0	6.10854	2.51905	4.32169	1.54486	0	0	0	0	0	0	0	0	0	0	0	0	0	1.32651	0	0	0	0	0	0	0	0	0	0	0	0	0
hsa-miR-644a	0	0	0	0	0	0	0	0	0	0	0	0	0	0	0	0	0	0	0	0	0	0	0	0	0	0	0	0	0	0	0	0	0	0	0	0	0	0	0	0	0	0	0	0	0	0	0	0	0
hsa-miR-645	0	0	0	0	0	0	0	0	0	0	0	0	0	0	0	0	0	0	0	0	0	0	0	0	0	0	0	0	0	0	0	0	0	0	0	0	0	0	0	0	0	0	0	0	0	0	0	0	0
hsa-miR-646	0	0	0	0	0	0	0	0	0	0	0	0	0	0	0	0	0	0	0	0	0	0	0	0	0	0	0	0	0	0	0	0	0	0	0	0	0	0	0	0	0	0	0	0	0	0	0	0	0
hsa-miR-647	0	0	0	0	0	0	0	0	0	0	0	0	0	0	0	0	0	0	0	0	0	0	0	0	0	0	0	0	0	0	0	0	0	0	0	0	0	0	0	0	0	0	0	0	0	0	0	0	0
hsa-miR-648	0	0	0	0	0	0	0	0	0	0	0	0	0	0	0	0	0	0	0	0	0	0	0	0	0	0	0	0	0	0	0	0	0	0	0	0	0	0	0	0	0	0	0	0	0	0	0	0	0
hsa-miR-649	0	0	0	0	0	0	0	0	0	0	0	0	0	0	0	0	0	0	0	0	0	0	0	0	0	0	0	0	0	0	0	0	0	0	0	0	0	0	0	0	0	0	0	0	0	0	0	0	0
hsa-miR-6499-3p	0	0	0	0	0	0	0	0	0	0	0	0	0	0	0	0	0	0	0	0	0	0	0	0	0	0	0	0	0	0	0	0	0	0	0	0	0	0	0	0	0	0	0	0	0	0	0	0	0
hsa-miR-6499-5p	0	0	0	0	0	0	0	0	0	0	0	0	0	0	0	0	0	0	0	0	0	0	7.15658	15.35	0	0	0	0	0	0	0	0	0	0	0	0	0	0	0	0	0	0	0	0	0	0	0	0	0
hsa-miR-650	0	0	0	0	0	0	0	0	0	0	0	0	0	0	0	0	0	0	0	0	0	0	0	0	0	0	0	0	0	0	0	0	0	0	5.00743	0	0	0	0	0	0	0	0	0	0	0	0	0	0
hsa-miR-6500-3p	0	0	0.12236	0	0	0.802869	0	0	0.327443	0	0	0	0	0	0	0	0	0	0	0.629763	0	0	5.91196	0.990324	0	0	0	0	0	0	0	0	0	0	0	0	3.64059	0	1.38675	0	3.57574	1.32735	0	0	0	0	0	0	0
hsa-miR-6500-5p	0	0	0	0	0	0	0	0	0	0	0	0	0	0	0	0	0	0	0	0	0	0	0	0	0	0	0	0	0	0	0	0	0	0	0	0	0	0	0	0	0	0	0	0	0	0	0	0	0
hsa-miR-6501-3p	0	0	0	0	0	0	0	0	0.400208	0	0	0	0	0	0	0	0	0	0	0	0	0	0	0	0	0	0	0	0	0	0	0	0	0	0	0	0	0	0	0	0	0	0	0	0	0	0	0	0
hsa-miR-6501-5p	0	0	0	0	0	1.08387	1.71335	2.02896	2.47401	6.23042	0	5.24935	4.83685	6.71481	10.7241	0	1.24062	0	0	0	0	0	8.40121	0	0.22934	0	0	0.428449	0.206219	0.527154	0.175768	0.590448	0	0	18.1519	0	0	0	4.71496	9.70078	0	10.2869	0	0	2.16132	1.1316	0	0.688934	0
hsa-miR-6502-3p	0	0	0	0	0	0	0	0	0.363826	0	0	0	0	0	0	0	0	0	0	0	0	0	0	0	0	0	0	0	0	0	0	0	0	0	0	0	0	0	0	0	0	0	0	0	0	0	0	0	0
hsa-miR-6502-5p	0	0	0.3059	0.124492	0	0.562009	2.57002	1.52172	2.61954	0	0	0	0	0	0	0	0	0	0	0.944644	0	0	0	1.48549	0	0	0	0	0	0	0	0.295224	0	0	0	0	0	0	0	0	0	0	0	0	0	0	0	0	0
hsa-miR-6503-3p	0	6.40562	10.523	11.0175	8.32927	3.57277	0	5.0724	1.60083	0	0.960158	0	0.806141	0	0.57195	0	0	0	0	9.13156	0	0	0	6.93227	0.22934	0.455605	0	0	0	0.351436	0	0	0	0.437183	0	4.64277	4.36871	0	0	5.5433	4.08656	3.31837	0	0	0	0	0	0	0
hsa-miR-6503-5p	0	3.10375	2.99782	7.84298	2.57227	1.48531	0	0	1.09148	0	0.576095	0	0.967369	0	1.28689	0	0	0	0	1.88929	0	0	0	0	0	0	0	0	0	0	0	0	0	0	0	1.32651	5.09683	0	2.49616	3.46457	0	1.65918	0	0	0	0	0	0	0
hsa-miR-6504-3p	0	0	0	0	0	0	0	0	0.764034	0	0	0	0	0	0	0	0	0	0	0	0	0	0	0	0	0	0	0	0	0	0	0	0	0	0	0	0	0	0	0	0	0	0	0	0	0	0	0	0
hsa-miR-6504-5p	0	0	0	0.124492	0	0.642296	0	0	0.436591	0	0	0	0	0	0	0	0	0	0	0	0	0	2.48925	0	0	0	0	0	0	0	0	0	0	0	0	2.65301	2.91248	0	0	0	0	0	0	0	0	0	0	0	0
hsa-miR-6505-3p	3.46834	0	0	0	0	0	0	0	0.691269	1.3216	0	1.59763	1.1286	0.99071	1.1439	0	1.92985	0	0	0	0	0	3.73387	0	0	0	0	0	0.206219	0	0	0	0	0	0	0	0	0	0	0	0	0	0	0	0	0	0	0	0
hsa-miR-6505-5p	3.46834	0	0	0	0	0.240861	0	0	0.472973	0.377601	0	0.684698	0	0	0.57195	0	0	0	0	0	0	0	0	0	0	0	0	0	0	0	0	0	0	0	0	0	0	0	0	0	0	0	0	0	0	0	0	0	0
hsa-miR-6506-3p	0	0	0	0	0	0	0	0	0	0	0	0	0	0	0	0	0	0	0	0	0	0	0	0	0	0	0	0	0	0	0	0	0	0	0	0	0	0	0	0	0	0	0	0	0	0	0	0	0
hsa-miR-6506-5p	0	0	0	0	0	0	0	0	0.582121	0	0	0	0	0	0	0	0	0	0	0	0	0	0	0	0	0	0	0	0	0	0	0	0	0	0	0	0	0	0	0	0	0	0	0	0	0	0	0	0
hsa-miR-6507-3p	0	0.858485	0.48944	1.12043	0.367468	0	0	0	0	0	0	0	0	0	0	0	0	0	0	0	0	0	0	0	0	0	0	0	0	0	0	0	0	0	0	0	0	0	0	0	0	0	0	0	0	0	0	0	0
hsa-miR-6507-5p	0	8.38673	5.13912	3.48577	5.45077	0.762726	0	0	0.836799	0	0	0	0	0	0	0	0	0	0	0	0	0	0	0	0	0	0	0	0	0	0	0	0	0	0	0	0	0	0	0	0	0	0	0	0	0	0	0	0
hsa-miR-6508-3p	0	0	0.18354	0.497967	0	0.401435	0	0	0.327443	0	0	0.456466	0	0	0	0	0	0	0	0	0	0	2.48925	2.47581	0	0	0	0	0	0	0	0	0	0	0	0	0	0	0.832052	0	0	0	0	0	0	0	0	0	0
hsa-miR-6508-5p	0	0	0	0	0	0	0	0	0	0	0	0	0	0	0	0	0	0	0	0	0	0	0	0	0	0	0	0	0	0	0	0	0	0	0	0	0	0	0	0	0	0	0	0	0	0	0	0	0
hsa-miR-6509-3p	0	0	0	0	0.122489	0	0	0	0	3.02081	1.15219	2.05409	0.806141	0.440316	0.714938	0.997183	0.827077	0	1.22171	0	0	0	0	0	0	0.455605	0.40304	0	0	0.175718	0.263652	0	0	0	0	0	0	0	0	0	0	0	0	0	0	0	0	0	0
hsa-miR-6509-5p	0	0	0	0.124492	0	0	0	0	0.509356	0.755202	0	0	0	0	0	0	0	0	0	0	0	0	0	1.73307	0	0	0	0	0	0	0	0	0	0	0	0	0	0	0	0	0	0	0	0	0.196484	0	0	0	0
hsa-miR-6510-3p	0	0	0	0	0	0	0	0	0.582121	0	0	0	0	0	0	0	0	0	0	0	0	0	48.2292	37.1371	0	0	0	0	0	0	0	0	0	0	0	0	5.09683	0	0	0	0	0	0	0	0	0	0	0	0
hsa-miR-6510-5p	0	0	0	0	0	0	0	0	0	0	0	0	0	0	0	0	0	0	0	0	0	0	0	0	0	0	0	0	0	0	0	0	0	0	0	0	0	0	0	0	0	0	0	0	0	0	0	0	0
hsa-miR-6511a-3p	1.95094	1.32075	1.89658	1.61839	1.22489	2.24803	0	1.01448	1.56445	31.1521	30.533	45.4183	14.9942	13.2095	42.6103	19.9437	21.3662	0	0	2.20417	0	0	9.95699	13.1218	8.25624	8.42869	5.64256	4.97001	7.01144	6.58942	5.88824	5.46164	6.84228	5.68338	5.00743	11.2753	10.9218	17.4524	10.8167	12.4724	13.7921	9.62326	8.52645	2.22048	15.031	9.61861	9.0653	13.2046	15.5295
hsa-miR-6511a-5p	0	0.594335	1.04006	0.74695	0	0	0	0	0	0	0	0	0	0	0	0	0	0	0	0	0	0	0	0	0	0	0	0	0	0	0	0	0	0	3.12965	0	0	0	0	0	0	0	0	0	0	0	0	0	0
hsa-miR-6511b-3p	3.46834	2.37734	2.26366	2.11636	1.77609	2.08746	0	0	3.01975	24.1665	15.5546	41.7666	17.7351	16.732	30.7423	34.4028	24.1231	0	0	0	0	0	21.1586	22.0347	3.66944	5.58116	6.17994	4.37018	5.25858	4.48081	4.30632	4.57597	6.67937	3.49747	8.13708	8.29067	11.6499	15.7903	5.82436	7.62204	18.3895	8.95959	6.46215	2.10362	8.84178	6.5067	6.79897	11.0229	10.9015
hsa-miR-6511b-5p	0	1.65093	1.2236	2.55208	1.04116	0	0	0	0.218295	0	0	0	0	0	0	0	0	0	0	0	0	0	0	2.72339	0	0	0	0	0	0	0	0	0	0	0	0	0	0	0	3.46457	0	0.99551	0	0	0	0	0	0	0.411379
hsa-miR-6512-3p	0	0	0	0	0	0	0	0	0	0	0	0	0	0	0	0	0	0	0	0	0	0	0	0	0	0	0	0	0	0	0	0	0	0	0	0	0	0	0	0	0	0	0	0	0	0	0	0	0
hsa-miR-6512-5p	0	0	0	0	0.183734	0	0	0	0	0	0	0	0	0	0	0	0	0	0	0	0	0	3.11156	4.70404	0	0	0	0	0	0	0	0	0	0	0	0	0	0	0	0	0	0	0	0	0	0	0	0	0
hsa-miR-6513-3p	0	0	0	0	0	0	0	0	0.836799	8.30722	4.03266	6.61875	6.44913	4.40316	7.43535	8.47606	6.34093	0	9.77366	5.0381	0	0	1.55578	7.92259	4.12812	5.12556	3.76171	2.485	2.68085	2.89935	2.90018	4.28075	2.93241	3.35174	6.25929	0.99488	0	0	0	2.4252	0	1.65918	0	0	1.1789	0	0	0	0
hsa-miR-6513-5p	0	4.88676	2.63074	3.05005	5.94073	0.883156	0	0	1.96466	1.5104	0.384063	1.82586	0.644913	0.220158	1.1439	1.99437	0.689231	0	0	1.57441	0	0	5.91196	4.20888	0	0	0	0	0	0	0	0	0	0	6.25929	1.65813	0	3.32427	1.1094	2.07874	5.1082	0	0	0	0.294726	0	0	0	0
hsa-miR-651-3p	0	0	0	0	0	0	0	0	0	0	0	0	0	0	0	0	0	0	0	0	0	0	0	0	0	0	0	0	0	0	0	0	0	0	0	0	0	0	0	0	0	0	0	0	0	0	0	0	0
hsa-miR-6514-3p	0	0	0	0	0	0	0	0	0	0	0	0	0	0	0	0	4.27323	0	0	0	0	0	0	0	0	0	0	0	0	0	0	0	0	0	0	0	0	4.15533	0	0	0	0	0	0	0	0	0	0	0
hsa-miR-6514-5p	0	0.858485	0.9177	0.74695	0.673691	0.802869	0	0	0.836799	0	0	0	0	0	0	0	0	0	0	0	0	0	0.622312	0	0	0	0.40304	0.342759	0	0	0.175768	0	0	0	0	0	3.64059	0	1.1094	0	0	2.98653	0.269256	0	0.196484	0	0	0.688934	0.719913
hsa-miR-6515-3p	0	0	0	0	0	0	0	0	0	3.20961	2.88047	0	1.45105	0	0	0	0	0	0	0	0	0	0	0	0	0	0	0	0	0	0	0	0	0	0	1.98976	0	0	0	0	0	0	0	0	0	0	0	0	0
hsa-miR-6515-5p	0	0.264149	0.24472	0.497967	0.306223	0.963443	0	0	0.509356	0	0	0	0	0	0	0	0	0	0	0	0	0	0	2.22823	0	0	0	0	0	0	0	0	0	0	0	0	0	0	0	5.5433	0	0	0	0	0	0	0	0.344467	0
hsa-miR-651-5p	9.1044	0.594335	0.55062	0.373475	0.244978	3.65306	2.14169	5.0724	11.3514	0.566401	0.576095	0	0.483685	0	0	0	0	26.0007	16.2894	5.98275	9.50772	23.9454	3.11156	6.68469	0	0	0	0	0	0	0	0	0	0	18.1519	6.63254	12.378	13.2971	14.6996	10.3937	16.8571	12.6098	0	0	0	0	0	0	0
hsa-miR-6516-3p	0	0.198112	0	0.248983	0.306223	0.602152	0	0	1.16424	0	0	0	0	0	0	0	0	8.41199	2.44341	1.57441	8.64339	5.0208	5.91196	0	0	0	0	0	0	0	0	0	0	0	5.00743	0	0	0	1.38675	0	2.5541	1.99102	0	0	0	0	0	0	0
hsa-miR-6516-5p	0	0.132075	0.12236	0.311229	0	0.602152	0.856675	1.52172	0.582121	0.944002	0.384063	0	0	0	0	0	0.275692	6.11781	6.92301	5.0381	6.05037	6.95188	1.24462	4.20888	0	0	0	0	0	0	0	0	0	0	4.3815	2.98464	0	3.32427	2.2188	2.07874	2.5541	1.32735	0	0	0	0	0	0	0
hsa-miR-652-3p	79.1216	13.3395	13.7043	16.2462	13.6575	78.2798	16.7052	15.7244	147.968	596.421	513.108	682.416	528.828	201.554	535.774	510.059	612.037	196.535	349.816	490.27	224.728	274.985	376.187	342.652	148.039	167.207	171.695	52.0994	77.8476	129.153	131.826	119.418	114.201	114.542	159.612	199.971	225.717	267.603	219.662	199.213	293.211	169.237	43.799	9.58314	290.698	155.312	154.11	71.9936	130.407
hsa-miR-652-5p	4.5522	0.198112	0	0.186738	0	4.69679	0	0	5.6393	0	0	0	0	0	0	0	0	9.17672	13.0315	12.9101	6.05037	13.5175	4.35618	2.22823	0	0	0	0	0	0	0	0	0	0	16.2742	21.8874	12.378	26.5941	16.3637	13.1653	26.5627	7.63224	0	0	0	0	0	0	0
hsa-miR-653-3p	7.80377	0.396224	0.12236	0.248983	0	0.562009	0	0	3.16528	0	0	0	0	0	0	0	0	6.11781	2.03618	1.57441	0	4.63459	0.622312	9.1605	0	0	0	0	0	0	0	0	0	0	2.50372	1.65813	3.64059	0	0	1.38583	3.57574	0	0	0	0	0	0	0	0
hsa-miR-653-5p	7.587	0.132075	0.12236	0.186738	0	3.4122	2.14169	1.52172	13.8254	0	0	0	0	0	0	0	0	0	2.85065	1.57441	0	5.0208	2.8004	8.17017	0	0	0	0	0	0	0	0	0	0	10.0149	8.29067	14.5624	4.15533	6.37906	6.92913	6.64066	11.2824	0	0	0	0	0	0	0
hsa-miR-654-3p	23.4113	9.77352	12.5419	15.437	9.24793	100.72	115.651	125.288	7.16737	0.755202	1.34422	2.28233	3.06334	4.73339	6.72042	5.48451	4.96246	516.955	489.09	407.771	194.476	338.325	22.4032	194.846	2.98142	4.89775	3.49301	1.37104	2.26841	2.63577	2.63652	2.06657	2.44367	2.47737	46.3188	47.4226	45.8715	40.7223	42.712	46.7716	0	54.0894	0	0	1.08066	0.8487	1.44221	0	0
hsa-miR-654-5p	0.867086	0.660373	1.40714	0.933688	0.673691	2.72976	0.856675	1.52172	0.400208	0	0	0	0	0	0	0	0	10.7062	8.14472	14.4845	9.50772	7.33809	28.9375	25.0057	0	0.569506	0	0	0	0	0	0	0	0	0	1.98976	2.18436	0	1.38675	1.73228	0	0	0	0	0	0	0	0	0
hsa-miR-655-3p	2.60126	3.96224	5.13912	6.22459	4.47086	0.682439	0	0	4.5842	0	0	0	0	0.550394	0	0	0	159.063	60.6781	54.7894	81.2478	117.023	13.6909	13.617	0	0	0	0	0	0	0	0	0	0	0	0.663254	0	0	1.38675	0	1.53246	0.663673	0	0	0	0	0	0	0
hsa-miR-655-5p	0	0.132075	0	0	0	0	0	0	0	0	0	0	0	0	0	0	0	0	0	1.25953	0	0	0	0	0	0	0	0	0	0	0	0	0	0	0	0	0	0	0	0	0	0	0	0	0	0	0	0	0
hsa-miR-656-3p	6.0696	4.22639	3.79316	3.92149	3.4297	2.28818	1.71335	1.01448	1.41892	0	0	0	0.483685	0.220158	0	0	0	42.8247	26.0631	15.7441	30.2519	29.3524	4.97849	6.4371	0	0	0	0	0	0	0	0	0	0	6.25929	3.31627	6.55307	0	4.71496	0	0	2.65469	0	0	0	0	0	0	0
hsa-miR-656-5p	0	0	0	0	0	0	0	0	0	0	0	0	0	0	0	0	0	0	0	2.83393	0	1.54486	0	0	0	0	0	0	0	0	0	0	0	0	0	0	0	0	0	0	0	0	0	0	0	0	0	0	0
hsa-miR-657	0	0	0	0	0	0	0	0	0	0	0	0	0	0	0	0	0	0	0	0	0	0	0	0	0	0	0	0	0	0	0	0	0	0	0	0	0	0	0	0	0	0	0	0	0	0	0	0	0
hsa-miR-658	0	0	0	0	0	0	0	0	0	0	0	0	0	0	0	0	0	0	0	0	0	0	0	0	0	0	0	0	0	0	0	0	0	0	0	0	0	0	0	0	0	0	0	0	0	0	0	0	0
hsa-miR-659-3p	0	0	0	0	0	0	0	0	0	0	0	0	0	0	0	0	0	0	0	0	0	0	0	1.98065	0	0	0	0	0	0	0	0	0	0	0	0	0	0	0	0	0	0	0	0	0	0	0	0	0
hsa-miR-659-5p	0.650314	1.12263	1.59068	2.48983	1.40863	3.21148	6.42506	3.04344	3.1289	0	0.768126	0.684698	0.967369	0.330237	0	0	0	0	2.85065	6.61251	0	4.24837	0	2.47581	1.94939	2.05022	1.74651	1.02828	1.75286	2.10862	2.10922	1.32851	1.95494	1.31155	6.25929	4.9744	12.378	8.31067	5.82436	5.88976	6.64066	6.96857	0	0	0.392968	0	0	0.344467	0.205689
hsa-miR-660-3p	0.867086	1.25471	1.71304	0.74695	1.53112	1.44516	0	0	1.49169	1.5104	3.6486	1.14116	2.74088	0.770552	3.86066	1.99437	1.10277	13.7651	27.2848	43.1388	23.3371	27.0351	6.22312	13.1218	0.34401	0.569506	0.537386	0	0	0.263577	0	0	0	0	5.00743	3.31627	5.09683	4.15533	1.6641	4.15748	3.57574	2.98653	0	0	0	0	0	0	0
hsa-miR-660-5p	86.275	26.4809	29.9782	51.3528	22.783	173.781	108.369	101.448	50.2807	49.6545	49.5441	39.9407	44.9827	11.228	25.8808	18.9465	23.4339	541.426	612.075	681.718	443.406	516.37	439.352	337.7	11.9257	10.9345	10.6134	10.0257	10.1047	10.5431	11.9522	11.6613	11.7296	8.74367	324.231	349.866	309.451	326.609	337.536	320.472	427.046	326.859	0.448761	0.233735	3.34023	2.829	3.91456	1.95198	1.13129
hsa-miR-661	0	0	0	0	0	0	0	0	0	0	0	0	0	0	0	0	0	0	0	0	0	0	0	0	0	0	0	0	0	0	0	0	0	0	0	0	0	0	0	0	0	0	0	0	0	0	0	0	0
hsa-miR-662	0	0	0	0	0	0	0	0	0	0	0	0	0	0	0	0	0	0	0	0	0	0	0	0	0	0	0	0	0	0	0	0	0	0	0	0	0	0	0	0	0	0	0	0	0	0	0	0	0
hsa-miR-663a	0	0	0	0	0	57.6059	0	0	0	0	0	0	0	0	0	0	0	0	87.9629	125.638	0	0	0	0	0	0	0	0	0	0	0	0	0	0	0	0	0	0	0	0	0	0	0	0	0	0	0	0	0
hsa-miR-663b	0	0	0	0	0	3.89392	0	0	1.12786	0	0	0	0	0	0	0	0	9.94144	3.66512	5.35298	8.64339	8.88296	0	2.22823	0	0	0	0	0	0	0	0	0	0	0	2.32139	0	4.9864	1.6641	0	0	1.32735	0	0	0	0	0	0	0
hsa-miR-664a-3p	25.7958	57.1222	50.7794	73.3879	50.2818	18.2251	25.7002	26.3765	33.3628	81.1842	80.6533	90.6084	66.5872	32.6934	94.8008	60.8282	87.2567	287.537	218.278	252.535	240.286	354.932	21.4698	24.7581	24.654	23.8054	24.3167	20.1371	23.3027	22.2283	19.4224	21.4037	16.617	18.0702	140.208	152.88	155.089	211.922	141.726	190.898	212.501	103.201	0.897521	0	2.55429	2.5461	1.85427	0.688934	0.205689
hsa-miR-664a-5p	2.16771	92.6503	103.822	94.6759	96.889	3.49248	5.14005	5.0724	9.20479	0.566401	0.576095	0.684698	1.45105	0	1.28689	0	1.24062	17.5887	30.5427	36.8411	9.50772	29.7386	23.3367	53.7251	0	0.227803	0	0	0	0	0.351537	0.295224	0	0.291456	33.1742	21.2241	21.1154	28.2563	28.0124	28.7559	30.6492	31.1926	0	0	1.27715	0	0.824118	0.344467	0.514223
hsa-miR-664b-3p	1.30063	2.24527	2.20248	3.67251	2.08232	1.64588	0.856675	1.01448	3.27443	8.30722	3.6486	6.61875	5.1593	3.41245	7.43535	5.48451	4.13539	20.6476	16.2894	28.3393	24.2015	23.5591	5.6008	1.48549	2.86675	3.41704	3.62736	1.79949	1.23731	3.33864	2.63652	2.80463	2.44367	2.18592	8.13708	8.95392	8.00931	4.9864	5.26966	7.27559	9.70558	5.64122	0	0	1.08066	0.8487	0.824118	0.229645	0.308534
hsa-miR-664b-5p	0	6.40562	5.5062	6.10009	7.53309	0.441578	0	0	1.63722	0	0	0	0	0	0	0	0	0	0	0.944644	0	0	0	9.40808	0	0	0	0	0	0	0	0	0	0	2.50372	0.99488	2.18436	0	2.2188	3.46457	2.04328	3.98204	0	0	0.294726	0	0.412059	0.344467	1.23414
hsa-miR-665	0	0.660373	0	0	0	3.73334	0	3.55068	0.582121	0	0	0	0	0	0	0	0	0	2.44341	6.29763	0	0	11.5128	47.7831	0	0	0	0	0	0	0	0	0	0	4.3815	0	2.91248	0	1.1094	0	0	1.65918	0	0	0	0	0	0	0
hsa-miR-668-3p	0	0	0	0	0	2.04732	0	0	0.181913	0	0	0	0	0	0.285975	0	0	0	1.22171	4.09346	0	2.70351	3.73387	0	0	0	0	0	0	0	0	0	0	0	0	0	0	0	0	0	0	0	0	0	0.294726	0	0	0	0
hsa-miR-668-5p	0	0	0	0	0	0	0	0	0	0	0	0	0	0	0	0	0	0	0	0	0	0	0	0	0	0	0	0	0	0	0	0	0	0	0	0	0	0	0	0	0	0	0	0	0	0	0	0	0
hsa-miR-670-3p	0	0	0	0.248983	0	0.682439	0	0	0	0	0	0	0	0	0	0	0	3.82363	2.85065	3.4637	5.18603	3.08972	0	0	0	0	0	0	0	0	0	0	0	0	0	0	2.91248	0	2.2188	0	0	0	0	0	0	0	0	0	0
hsa-miR-670-5p	0	0	0	0	0	0	0	0	0	0	0	0	0	0	0	0	0	0	0	0	0	0	0	0	0	0	0	0	0	0	0	0	0	0	0	0	0	0	0	0	0	0	0	0	0	0	0	0	0
hsa-miR-671-3p	1.5174	0	0	0.311229	0	42.7127	30.4119	28.4054	1.56445	4.15361	2.11235	2.51056	3.38579	2.86205	2.43079	5.48451	4.13539	3.82363	10.5881	15.4292	6.05037	11.9727	31.7379	57.9339	2.63741	2.84753	2.68693	3.25621	3.09328	3.16292	4.39421	3.54269	4.07279	2.18592	27.5409	40.4585	42.959	39.8912	36.8876	39.8425	24.0085	24.8877	1.43603	0	2.55429	0	1.23618	2.52609	2.15974
hsa-miR-6715a-3p	0	0	0	0	0	0	7.71007	0	0	0	0	0	0	0	0	0	0	0	0	0	0	0	0	0	0	0	0	0	0	0	0	0	0	0	5.00743	0	0	0	0	4.85039	4.08656	1.32735	0	0	0	0	0	0	0
hsa-miR-6715b-3p	0	0	0	0	0	0	1.28501	0	0	0	0	0	0	0	0	0	0	0	0	0	0	0	0	0	0	0	0	0	0	0	0	0	0	0	0	0	0	0	0	0	0	0	0	0	0	0	0	0	0
hsa-miR-6715b-5p	0	0	0	0	0	0	0	0	0	0	0	0	0	0	0	0	0	0	0	0	0	0	0	0	0	0	0	0	0	0	0	0	0	0	0	0	0	0	0	0	0	0	0	0	0	0	0	0	0
hsa-miR-671-5p	2.38449	0	0	0	0.183734	5.66023	3.4267	3.04344	19.1372	0	0	1.14116	0	0	1.42988	0	2.20554	91.7672	148.641	237.106	110.635	129.382	59.4308	15.5976	0	0	0	0	0	0	0	0	0	0	17.526	12.9334	19.6592	16.6213	10.8167	16.2835	21.9653	7.96408	0	0	0	0	0	1.0334	0.719913
hsa-miR-6716-3p	0	0.264149	0	0.186738	0.367468	2.00717	0	0	2.2921	0	0	0	0	0	0	0	0	0	0	5.0381	0	3.47594	0.933467	0	0.22934	0	0	0	0	0	0	0	0	0	8.13708	2.32139	0	6.64853	3.60556	7.9685	3.06492	3.31837	0	0	0	0	0	0	0
hsa-miR-6716-5p	0	0	0	0	0	0	0	0	0	0	0	0	0	0	0	0	0	0	0	0	0	0	0	0	0	0	0	0	0	0	0	0	0	0	0	0	0	0	0	0	0	0	0	0	0	0	0	0	0
hsa-miR-6717-5p	0	0	0	0.248983	0	0	0	0	0.363826	0	0	0	0	0	0	0	0	0	0	0	0	0	3.73387	0	0	0	0	0	0	0	0	0	0	0	0	0	0	0	0	0	0	0	0	0	0	0	0	0	0
hsa-miR-6718-5p	0	0	0	0	0	0	0	0	0.400208	0	0	0	0	0	0	0	0	0	0	0	0	0	0	0	0	0	0	0	0	0	0	0	0	0	0	0	0	0	0	0	0	0	0	0	0	0	0	0	0
hsa-miR-6719-3p	0	0	0	0	0	0	0	0	0	0	0	0	0	0	0	0	0	0	0	0	0	0	0	0	0	0	0	0	0	0	0	0	0	0	0	0	0	0	0	0	0	0	0	0	0	0	0	0	0
hsa-miR-6720-3p	0	1.51886	1.5295	1.86738	1.28614	0	0	0	1.23701	0	0	0	0	0	0	0	0	0	0	0	0	0	0	0	0	0	0	0	0	0	0	0	0	0	0	0	0	0	0	0	0	0	0	0	0	0	0	0	0
hsa-miR-6720-5p	0	0.924522	0.6118	0.435721	0.612446	0	0	0	0	0	0	0	0	0	0	0	0	0	0	2.83393	0	0	0	2.47581	0	0	0	0	0	0	0	0	0	0	0	0	0	0	0	0	0	0	0	0	0	0	0	0	0
[truncated: 547 more rows]
[truncated: 481 more columns]

## Sheet: Key
SRAnumber	Sample Name (ALL RPM data)	Organ/Cell Type	Specific Cancer LineCell_Tissue
SRR1820680	Skeletal muscle SRR1820680	Skeletal muscle
DRR013035	Bladder Epithelium DRR013035	Bladderepithelium
DRR013036	Bladder Epithelium DRR013036	BladderEpithelium
DRR013037	Bladder Epithelium DRR013037	BladderEpithelium
DRR013038	Bladder Epithelium DRR013038	BladderEpithelium
SRR649562	Colon SRR649562	Colon
SRR950887	Liver SRR950887	Liver
SRR950886	Liver SRR950886	Liver
SRR372642	Lung SRR372642	Lung
SRR2201546	Blood SRR2201546	Blood
SRR2201547	Blood SRR2201547	Blood
SRR2201548	Blood SRR2201548	Blood
SRR2201549	Blood SRR2201549	Blood
SRR2201550	Blood SRR2201550	Blood
SRR2201551	Blood SRR2201551	Blood
SRR2201572	Blood SRR2201572	Blood
SRR2201573	Blood SRR2201573	Blood
ERR852089	Pancreas ERR852089	Pancreas
ERR852091	Pancreas ERR852091	Pancreas
ERR852092	Pancreas ERR852092	Pancreas
ERR852097	Pancreas ERR852097	Pancreas
ERR852099	Pancreas ERR852099	Pancreas
SRR2174542	Skin SRR2174542	Skin
SRR2174541	Skin SRR2174541	Skin
SRR2061740	Blood SRR2061740	Blood
SRR2061741	Blood SRR2061741	Blood
SRR2061742	Blood SRR2061742	Blood
SRR2061743	Blood SRR2061743	Blood
SRR2061744	Blood SRR2061744	Blood
SRR2061745	Blood SRR2061745	Blood
SRR2061746	Blood SRR2061746	Blood
SRR2061747	Blood SRR2061747	Blood
SRR2061748	Blood SRR2061748	Blood
SRR2061749	Blood SRR2061749	Blood
SRR1658401	Thyroid SRR1658401	Thyroid
SRR1658402	Thyroid SRR1658402	Thyroid
SRR1658403	Thyroid SRR1658403	Thyroid
SRR1658404	Thyroid SRR1658404	Thyroid
SRR1658405	Thyroid SRR1658405	Thyroid
SRR1658406	Thyroid SRR1658406	Thyroid
SRR1658407	Thyroid SRR1658407	Thyroid
SRR1658408	Thyroid SRR1658408	Thyroid
SRR1949839	Blood SRR1949839	Blood
SRR1949840	Blood SRR1949840	Blood
SRR1949841	Blood SRR1949841	Blood
SRR1949842	Blood SRR1949842	Blood
SRR1949843	Blood SRR1949843	Blood
SRR1949844	Blood SRR1949844	Blood
SRR1949845	Blood SRR1949845	Blood
SRR1949846	Blood SRR1949846	Blood
SRR1949847	Blood SRR1949847	Blood
SRR1949848	Blood SRR1949848	Blood
SRR1949849	Blood SRR1949849	Blood
SRR1759212	Prefrontal Cortex SRR1759212	BrainPrefrontalCortex
SRR1759213	Prefrontal Cortex SRR1759213	BrainPrefrontalCortex
SRR1759214	Prefrontal Cortex SRR1759214	BrainPrefrontalCortex
SRR1759215	Prefrontal Cortex SRR1759215	BrainPrefrontalCortex
SRR1759216	Prefrontal Cortex SRR1759216	BrainPrefrontalCortex
SRR1759217	Prefrontal Cortex SRR1759217	BrainPrefrontalCortex
SRR1759218	Prefrontal Cortex SRR1759218	BrainPrefrontalCortex
SRR1759219	Prefrontal Cortex SRR1759219	BrainPrefrontalCortex
SRR1759220	Prefrontal Cortex SRR1759220	BrainPrefrontalCortex
SRR1556139	Uterus SRR1556139	Uterus
SRR1556141	Uterus SRR1556141	Uterus
SRR1556143	Uterus SRR1556143	Uterus
SRR1608271	Lung SRR1608271	Lung
SRR1608272	Lung SRR1608272	Lung
SRR1608273	Lung SRR1608273	Lung
SRR1608274	Lung SRR1608274	Lung
SRR1608275	Lung SRR1608275	Lung
SRR1608276	Lung SRR1608276	Lung
SRR1608277	Lung SRR1608277	Lung
SRR1608278	Lung SRR1608278	Lung
SRR1608279	Lung SRR1608279	Lung
SRR1608280	Lung SRR1608280	Lung
SRR1608281	Lung SRR1608281	Lung
SRR1608282	Lung SRR1608282	Lung
SRR1608283	Lung SRR1608283	Lung
SRR1608284	Lung SRR1608284	Lung
SRR1608285	Lung SRR1608285	Lung
DRR013040	Bladder DRR013040	Bladder
DRR013041	Bladder DRR013041	Bladder
DRR013042	Bladder DRR013042	Bladder
DRR013043	Bladder DRR013043	Bladder
DRR013044	Bladder DRR013044	Bladder
SRR1216774	Lung SRR1216774	Lung
SRR1216779	Lung SRR1216779	Lung
SRR1216789	Lung SRR1216789	Lung
SRR1216801	Lung SRR1216801	Lung
SRR1216823	Lung SRR1216823	Lung
SRR1216836	Lung SRR1216836	Lung
SRR1216838	Lung SRR1216838	Lung
SRR1216840	Lung SRR1216840	Lung
SRR822437	Plasma SRR822437	Plasma
SRR822438	Plasma SRR822438	Plasma
SRR822439	Plasma SRR822439	Plasma
SRR822443	Plasma SRR822443	Plasma
SRR822444	Plasma SRR822444	Plasma
SRR822445	Plasma SRR822445	Plasma
SRR822446	Plasma SRR822446	Plasma
SRR822447	Plasma SRR822447	Plasma
SRR822450	Plasma SRR822450	Plasma
SRR822451	Plasma SRR822451	Plasma
SRR822452	Placenta SRR822452	Placenta
SRR822453	Placenta SRR822453	Placenta
SRR822454	Placenta SRR822454	Placenta
SRR822455	Placenta SRR822455	Placenta
SRR822456	Placenta SRR822456	Placenta
SRR822457	Placenta SRR822457	Placenta
SRR822458	Placenta SRR822458	Placenta
SRR822459	Placenta SRR822459	Placenta
SRR333658	Bladder SRR333658	Bladder
SRR333660	Bladder SRR333660	Bladder
SRR333662	Bladder SRR333662	Bladder
SRR333664	Bladder SRR333664	Bladder
SRR333666	Bladder SRR333666	Bladder
SRR333668	Bladder SRR333668	Bladder
SRR333670	Bladder SRR333670	Bladder
SRR333672	Bladder SRR333672	Bladder
SRR333674	Bladder SRR333674	Bladder
SRR333676	Testes SRR333676	Testes
SRR333678	Testes SRR333678	Testes
SRR333680	Testes SRR333680	Testes
SRR333682	Testes SRR333682	Testes
SRR333684	Testes SRR333684	Testes
SRR333686	Testes SRR333686	Testes
SRR333688	Testes SRR333688	Testes
SRR837471	Blood SRR837471	Blood
SRR837472	Blood SRR837472	Blood
SRR837473	Blood SRR837473	Blood
SRR837474	Blood SRR837474	Blood
SRR837475	Blood SRR837475	Blood
SRR837476	Blood SRR837476	Blood
SRR837477	Blood SRR837477	Blood
SRR944031	Adrenal SRR944031	Adrenal
SRR944034	Adrenal SRR944034	Adrenal
SRR944040	Adrenal SRR944040	Adrenal
ERR038405	Brain ERR038405	Brain
ERR038406	Brain ERR038406	Brain
ERR038407	Brain ERR038407	Brain
ERR038408	Brain ERR038408	Brain
ERR038409	Brain ERR038409	Brain
ERR038410	Liver ERR038410	Liver
ERR038411	Liver ERR038411	Liver
ERR038412	Liver ERR038412	Liver
ERR038413	Liver ERR038413	Liver
ERR038414	Liver ERR038414	Liver
ERR038415	Testes ERR038415	Testes
ERR038416	Testes ERR038416	Testes
ERR038417	Testes ERR038417	Testes
ERR038419	Testes ERR038419	Testes
ERR038422	Kidney ERR038422	Kidney
ERR038423	Kidney ERR038423	Kidney
ERR038424	Kidney ERR038424	Kidney
ERR038420	Kidney ERR038420	Kidney
ERR038421	Kidney ERR038421	Kidney
ERR038425	Heart ERR038425	Heart
ERR038426	Heart ERR038426	Heart
ERR038427	Heart ERR038427	Heart
SRR448330	Brain, Frontal SRR448330	BrainFrontal
SRR448331	Brain, Frontal SRR448331	BrainFrontal
SRR1291267	Thyroid SRR1291267	Thyroid
SRR1291268	Thyroid SRR1291268	Thyroid
SRR1291269	Thyroid SRR1291269	Thyroid
SRR553573	Cerebellum SRR553573	BrainCerebellum
SRR553574	Heart SRR553574	Heart
SRR553575	Kidney SRR553575	Kidney
SRR553572	Frontal cortex SRR553572	BrainFrontalcortex
SRR553576	Testes SRR553576	Testes
SRR772343	Fat SRR772343	Fat
SRR772344	Fat SRR772344	Fat
SRR772345	Fat SRR772345	Fat
SRR772353	Fat SRR772353	Fat
SRR772354	Fat SRR772354	Fat
SRR772356	Fat SRR772356	Fat
SRR772359	Fat SRR772359	Fat
SRR772360	Fat SRR772360	Fat
SRR772362	Fat SRR772362	Fat
SRR772363	Fat SRR772363	Fat
SRR772366	Fat SRR772366	Fat
SRR772367	Fat SRR772367	Fat
SRR772368	Fat SRR772368	Fat
SRR772369	Fat SRR772369	Fat
SRR772370	Fat SRR772370	Fat
SRR837819	Colon SRR837819	Colon
SRR837824	Colon SRR837824	Colon
SRR837827	Colon SRR837827	Colon
SRR837830	Colon SRR837830	Colon
SRR837833	Colon SRR837833	Colon
SRR837836	Colon SRR837836	Colon
SRR837839	Colon SRR837839	Colon
SRR837842	Colon SRR837842	Colon
SRR384894	Epididymis SRR384894	Epididymis
SRR567635	Placenta SRR567635	Placenta
SRR567636	Placenta SRR567636	Placenta
SRR567637	Placenta SRR567637	Placenta
SRR567638	Placenta SRR567638	Placenta
SRR567642	Placenta SRR567642	Placenta
SRR567643	Placenta SRR567643	Placenta
SRR567644	Placenta SRR567644	Placenta
SRR567645	Placenta SRR567645	Placenta
SRR372638	Lung SRR372638	Lung
SRR372640	Lung SRR372640	Lung
SRR372642	Lung SRR372642	Lung
SRR372644	Lung SRR372644	Lung
SRR372646	Lung SRR372646	Lung
SRR372648	Lung SRR372648	Lung
SRR372650	Lung SRR372650	Lung
SRR372614	Lung SRR372614	Lung
SRR372616	Lung SRR372616	Lung
SRR372618	Lung SRR372618	Lung
SRR372620	Lung SRR372620	Lung
SRR372624	Lung SRR372624	Lung
SRR372626	Lung SRR372626	Lung
SRR372630	Lung SRR372630	Lung
SRR372632	Lung SRR372632	Lung
SRR372634	Lung SRR372634	Lung
SRR372636	Lung SRR372636	Lung
SRR1259212	Epidermis SRR1259212	SkinEpidermis
SRR1259222	Dermis SRR1259222	SkinDermis
SRR1259224	Dermis SRR1259224	SkinDermis
SRR1259216	Dermis SRR1259216	SkinDermis
SRR1259218	Dermis SRR1259218	SkinDermis
SRR1259220	Dermis SRR1259220	SkinDermis
SRR1259226	Skin SRR1259226	Skin
SRR1259228	Skin SRR1259228	Skin
SRR1259230	Skin SRR1259230	Skin
SRR1259236	Skin SRR1259236	Skin
SRR2174509	Skin SRR2174509	Skin
SRR2174513	Skin SRR2174513	Skin
SRR2174517	Skin SRR2174517	Skin
SRR2174521	Skin SRR2174521	Skin
SRR2174525	Skin SRR2174525	Skin
SRR2174529	Skin SRR2174529	Skin
SRR2174533	Skin SRR2174533	Skin
ERR409878	Prefrontal Cortex ERR409878	BrainPrefrontalCortex
ERR409879	Prefrontal Cortex ERR409879	BrainPrefrontalCortex
ERR409882	Prefrontal Cortex ERR409882	BrainPrefrontalCortex
ERR409883	Prefrontal Cortex ERR409883	BrainPrefrontalCortex
ERR409887	Prefrontal Cortex ERR409887	BrainPrefrontalCortex
ERR409888	Prefrontal Cortex ERR409888	BrainPrefrontalCortex
ERR409891	Prefrontal Cortex ERR409891	BrainPrefrontalCortex
ERR409893	Prefrontal Cortex ERR409893	BrainPrefrontalCortex
ERR409896	Prefrontal Cortex ERR409896	BrainPrefrontalCortex
ERR409898	Prefrontal Cortex ERR409898	BrainPrefrontalCortex
ERR409900	Prefrontal Cortex ERR409900	BrainPrefrontalCortex
SRR040010	Cervix SRR040010	Cervix
SRR040012	Cervix SRR040012	Cervix
SRR040014	Cervix SRR040014	Cervix
SRR040018	Cervix SRR040018	Cervix
SRR040024	Cervix SRR040024	Cervix
ERR973601	Retina ERR973601	Retina
ERR973602	Retina ERR973602	Retina
ERR973603	Retina ERR973603	Retina
ERR973604	Retina ERR973604	Retina
ERR973605	Retina ERR973605	Retina
ERR973606	Retina ERR973606	Retina
ERR973607	Retina ERR973607	Retina
ERR973608	Retina ERR973608	Retina
ERR973609	RPE_Choroid ERR973609	RPE/Choroid
ERR973610	RPE_Choroid ERR973610	RPE/Choroid
ERR973611	Retina ERR973611	Retina
ERR973612	Retina ERR973612	Retina
ERR973613	Retina ERR973613	Retina
ERR973614	Retina ERR973614	Retina
ERR973615	Retina ERR973615	Retina
ERR973616	Retina ERR973616	Retina
ERR973617	Retina ERR973617	Retina
ERR973618	Retina ERR973618	Retina
SRR5127206	JH-21_Ao_Adv_Fib	Fibroblast Aorta Adventitia
SRR5127217	JH-26_Ao_SMC	Smooth Muscle Cell Aorta
SRR5127214	JH-01_Astrocytes	Astrocyte
SRR5127215	JH-30_Bd_SMC	Smooth Muscle Cell Bladder
SRR5127205	JH-06_Derm_Fib_Ad	Fibroblast Dermal (adult)
SRR5127225	JH-07_Derm_Fib_Neo	Fibroblast Dermal (neonatal)
SRR5127203	JH-10_Epi_Kera_Ad	Epithelium Keratinocyte (Adult)
SRR5127208	JH-11_Epi_Kera_Neo	Epithelium Keratinocyte (Neonatal)
SRR5139121	JH-31_HAEC	Endothelial Aortic
SRR5127213	JH-04_HUVEC	Endothelial Umbilical vein
SRR5127221	JH-14_Mesangial	Mesangial
SRR5127233	JH-15_Osteoblasts	Osteoblast
SRR5127227	JH-22_Per_lig_Fib	Fibroblast Periodonal ligament
SRR5127235	JH-18_Ren_Epi	Epithelium Renal
SRR5127210	JH-20_RPE	Epithelium Retinal Pigment
SRR5127202	JH-25_Sk_Mus_Cell	Skeletal Muscle Cell
SRR5127216	JH-02_Bronch_Epi	Epithelium Bronchial
SRR5127229	JH-03_Chondr	Chondrocyte
SRR5127201	JH-05_MVEC	Endothelial Microvascular
SRR5127236	JH-08_Card_fib	Fibroblast Cardiac
SRR5127207	JH-12_melanocyte	Melanocyte
SRR5127224	JH-13_Mammary_Epi	Epithelium Mammary
SRR5127212	JH-16_Pros_Epi	Epithelium Prostate
SRR5127204	JH-17_Renal_Cor_Epi	Epithelium Renal Cortex
SRR5127230	JH-19_Renal_Prox	Epithelium Renal Proximal
SRR5127226	JH-23_Pros_Strom	Stromal cell Prostate
SRR5127218	JH-24_Skel_Musc_Myo	Myoblast Skeletal Muscle
SRR5127223	JH-27_Intest_Epi	Epithelium Intestinal
SRR5127220	JH-28_Myofib	Myofibroblast
SRR5127222	JH-29_Pros_SMC	Smooth Muscle Cell Prostate
SRR5127234	JH-42_Dopa_Neu	Neuron Dopaminergic
SRR5127209	JH-46_Cort_Neu	Neuron Cortical
SRR5127211	Aortic Smooth Mucle Cells	Smooth Muscle Cell Aorta
SRR5127200	Lymphocyte, CD3	CD3+ T Cell Splenic
SRR5127232	Red Blood Cell	Red Blood Cell
SRR5127228	Endothelial, coronary	Endothelial Coronary
SRR5127219	Colonic Epithelium	Epithelium Colonic Epithelium
SRR5127231	Fibroblast, coronary	Fibroblast Coronary Artery
SRR493011	RPE SRR493011	Epithelium Retinal Pigment
SRR493013	RPE SRR493013	Epithelium Retinal Pigment
SRR493015	RPE SRR493015	Epithelium Retinal Pigment
SRR873410	Islet Beta Cell SRR873410	Islet Beta Cell
SRR1028924	Islet Alpha Cell SRR1028924	Islet Alpha Cell
SRR527681	CD14+ monocytes SRR527681	CD14+ Monocyte
ERR747965	Platelet ERR747965	Platelet
ERR747966	Platelet ERR747966	Platelet
ERR747967	Platelet ERR747967	Platelet
ERR842903	Biliosphere ERR842903	Biliosphere
ERR842904	Biliosphere ERR842904	Biliosphere
ERR842905	Biliosphere ERR842905	Biliosphere
ERR842906	Biliosphere ERR842906	Biliosphere
ERR842911	Biliosphere ERR842911	Biliosphere
ERR842914	Biliosphere ERR842914	Biliosphere
ERR842916	Biliosphere ERR842916	Biliosphere
ERR842917	Biliosphere ERR842917	Biliosphere
SRR1988280	Neural Stem Cell SRR1988280	Neural Stem Cell
SRR1988281	Neural Stem Cell SRR1988281	Neural Stem Cell
SRR1988282	Neural Stem Cell SRR1988282	Neural Stem Cell
SRR1988283	Fibroblast_lung SRR1988283	Fibroblast Lung
SRR1988284	Fibroblast_lung SRR1988284	Fibroblast Lung
SRR1988285	Fibroblast_lung SRR1988285	Fibroblast Lung
SRR1988286	Fibroblast_lung SRR1988286	Fibroblast Lung
SRR1988287	H9_ESC SRR1988287	H9 ESC
SRR1988288	H9_ESC SRR1988288	H9 ESC
SRR1988289	H9_ESC SRR1988289	H9 ESC
SRR1988290	H9_ESC SRR1988290	H9 ESC
SRR1988291	H9_Diff_ForeBrain SRR1988291	H9 Differentiated Forebrain
SRR1988292	H9_Diff_ForeBrain SRR1988292	H9 Differentiated Forebrain
SRR1988293	H9_Diff_ForeBrain SRR1988293	H9 Differentiated Forebrain
SRR1988294	H9_Diff_ForeBrain SRR1988294	H9 Differentiated Forebrain
SRR1988295	H9_Diff_Mes SRR1988295	H9 Differentiated Mesenchymal
SRR1988296	H9_Diff_Mes SRR1988296	H9 Differentiated Mesenchymal
SRR1988297	H9_Diff_Mes SRR1988297	H9 Differentiated Mesenchymal
SRR1988298	H9_Diff_Mes SRR1988298	H9 Differentiated Mesenchymal
SRR1988299	H9_Diff_MidBrain SRR1988299	H9 Differentiated Midbrain
SRR1988300	H9_Diff_MidBrain SRR1988300	H9 Differentiated Midbrain
SRR1988301	H9_Diff_MidBrain SRR1988301	H9 Differentiated Midbrain
SRR1988302	H9_Diff_MidBrain SRR1988302	H9 Differentiated Midbrain
SRR1913137	Melanocyte SRR1913137	Melanocyte
SRR1853806	CD8+ T Cell SRR1853806	CD8+ T Cell (Adult)
SRR1853807	CD8+ T Cell SRR1853807	CD8+ T Cell (Neonatal)
SRR1853808	CD8+ T Cell SRR1853808	CD8+ T Cell (Neonatal)
SRR1853809	CD8+ T Cell SRR1853809	CD8+ T Cell (Neonatal)
SRR1636959	H7 ESC SRR1636959	H7 ESC
SRR1708906	Dendritic SRR1708906	Dendritic
SRR1708907	Dendritic SRR1708907	Dendritic
SRR1708908	Dendritic SRR1708908	Dendritic
SRR1708909	Dendritic SRR1708909	Dendritic
SRR1708910	Dendritic SRR1708910	Dendritic
SRR1708911	Dendritic SRR1708911	Dendritic
SRR1708912	Dendritic SRR1708912	Dendritic
SRR1708913	Dendritic SRR1708913	Dendritic
SRR1708914	Dendritic SRR1708914	Dendritic
SRR1708915	Dendritic SRR1708915	Dendritic
SRR1708916	Dendritic SRR1708916	Dendritic
SRR1708917	Dendritic SRR1708917	Dendritic
SRR1708918	Dendritic SRR1708918	Dendritic
SRR1708919	Dendritic SRR1708919	Dendritic
SRR1708920	Dendritic SRR1708920	Dendritic
SRR1708921	Dendritic SRR1708921	Dendritic
SRR1708922	Dendritic SRR1708922	Dendritic
SRR1708923	Dendritic SRR1708923	Dendritic
SRR1777163	Neuron_iPSC SRR1777163	Neuron iPSC
SRR1777162	Neuron_iPSC SRR1777162	Neuron iPSC
SRR1777161	Neuron_iPSC SRR1777161	Neuron iPSC
SRR1777164	Neuron_iPSC SRR1777164	Neuron iPSC
SRR1777165	Neuron_iPSC SRR1777165	Neuron iPSC
SRR1777166	Neuron_iPSC SRR1777166	Neuron iPSC
SRR1777167	Neuron_iPSC SRR1777167	Neuron iPSC
SRR1777168	Neuron_iPSC SRR1777168	Neuron iPSC
SRR1777169	Neuron_iPSC SRR1777169	Neuron iPSC
SRR1592244	Platelet SRR1592244	Platelet
SRR1592245	Platelet SRR1592245	Platelet
SRR1592246	Platelet SRR1592246	Platelet
SRR1592247	Platelet SRR1592247	Platelet
SRR1592249	Platelet SRR1592249	Platelet
SRR1592248	Platelet SRR1592248	Platelet
SRR1532971	CD4 T Cell SRR1532971	CD4+ T Cell
SRR1532972	CD4 T Cell SRR1532972	CD4+ T Cell
SRR1532973	CD4 T Cell SRR1532973	CD4+ T Cell
SRR1532974	Macrophage SRR1532974	Macrophage
SRR1532975	Macrophage SRR1532975	Macrophage
SRR1055961	Myotube SRR1055961	Myotube Skeletal Muscle
SRR1055962	Myoblast SRR1055962	Myoblast Skeletal Muscle
SRR1055963	Myotube SRR1055963	Myotube Skeletal Muscle
SRR1200834	Myoblast SRR1200834	Myoblast Skeletal Muscle
SRR1200888	Myotube SRR1200888	Myotube Skeletal Muscle
SRR1200890	Myoblast SRR1200890	Myoblast Skeletal Muscle
SRR1664893	RBC SRR1664893	Red Blood Cell
SRR1664894	RBC SRR1664894	Red Blood Cell
SRR1664895	RBC SRR1664895	Red Blood Cell
SRR1664896	RBC SRR1664896	Red Blood Cell
SRR1664897	RBC SRR1664897	Red Blood Cell
SRR1028925	Beta SRR1028925	Islet Beta Cell
SRR871671	Beta Cell SRR871671	Islet Beta Cell
SRR926589	PBMC SRR926589	Monocyte
SRR873401	Beta Cell SRR873401	Islet Beta Cell
SRR948071	Valve Interstitial Cell SRR948071	Valve Interstitial Cell
SRR948072	Valve Interstitial Cell SRR948072	Valve Interstitial Cell
SRR948073	Valve Interstitial Cell SRR948073	Valve Interstitial Cell
SRR948074	Valve Interstitial Cell SRR948074	Valve Interstitial Cell
SRR948075	Valve Interstitial Cell SRR948075	Valve Interstitial Cell
SRR948076	Valve Interstitial Cell SRR948076	Valve Interstitial Cell
SRR060981	B lymphocyte Centroblast SRR060981	B Cell Centroblast
SRR060982	B lymphocyte Centrocyte SRR060982	B Cell Centrocyte
SRR060983	B lymphocyte Pre-germinal center SRR060983	B Cell_Pre-germinal center
SRR060984	Plasma Cell SRR060984	Plasma Cell
SRR060985	B lymphocyte naive SRR060985	B Cell_naive
SRR060986	B lymphocyte memory SRR060986	B Cell_memory
SRR1209512	B lymphocyte CD77 SRR1209512	B Cell_CD77
SRR1209513	B lymphocyte CD77 SRR1209513	B Cell_CD77
SRR1209514	B lymphocyte CD77 SRR1209514	B Cell_CD77
SRR1209515	B lymphocyte CD77 SRR1209515	B Cell_CD77
SRR350510	H9 SRR350510	H9 ESC
ERR457736	Corona Radiata ERR457736	Corona Radiata
ERR457737	Cumulus Oophorus ERR457737	Cumulus Oophorus
SRR1542718	iPSC-CM SRR1542718	iPSC-CM
ERR356515	Macrophage ERR356515	Macrophage
ERR356519	Macrophage ERR356519	Macrophage
ERR356520	Macrophage ERR356520	Macrophage
ERR356521	Macrophage ERR356521	Macrophage
SRR2296788	THP1 SRR2296788	Monocytic leukemia	THP-1
ERR738403	HepG2 ERR738403	Hepatocellular carcinoma	HepG2
ERR738404	HepG2 ERR738404	Hepatocellular carcinoma	HepG2
ERR738405	HepG2 ERR738405	Hepatocellular carcinoma	HepG2
ERR738406	HepG2 ERR738406	Hepatocellular carcinoma	HepG2
ERR738411	HepG2 ERR738411	Hepatocellular carcinoma	HepG2
ERR738413	HepG2 ERR738413	Hepatocellular carcinoma	HepG2
ERR738414	HepG2 ERR738414	Hepatocellular carcinoma	HepG2
ERR738415	HepG2 ERR738415	Hepatocellular carcinoma	HepG2
ERR738416	HepG2 ERR738416	Hepatocellular carcinoma	HepG2
ERR738417	HepG2 ERR738417	Hepatocellular carcinoma	HepG2
ERR372263	ZR75.1 ERR372263	Breast ductal carcinoma	ZR75.1
ERR372264	ZR75.1 ERR372264	Breast ductal carcinoma	ZR75.1
ERR372265	ZR75.1 ERR372265	Breast ductal carcinoma	ZR75.1
SRR2085171	Hep3B SRR2085171	Hepatocellular carcinoma	Hep3B
SRR2085172	Huh7 SRR2085172	Hepatocellular carcinoma	Huh7
SRR1917323	DKO1 SRR1917323	Colon adenocarcinoma	DKO1
SRR1917324	DKO1 SRR1917324	Colon adenocarcinoma	DKO1
SRR1917325	DKO1 SRR1917325	Colon adenocarcinoma	DKO1
SRR1917335	DLD1 SRR1917335	Colon adenocarcinoma	DLD1
SRR1917336	DLD1 SRR1917336	Colon adenocarcinoma	DLD1
SRR1917337	DLD1 SRR1917337	Colon adenocarcinoma	DLD1
SRR1917329	DKS8 SRR1917329	Colon adenocarcinoma	DKS8
SRR1917330	DKS8 SRR1917330	Colon adenocarcinoma	DKS8
SRR1917331	DKS8 SRR1917331	Colon adenocarcinoma	DKS8
SRR1913138	A375 SRR1913138	Melanoma	A375
SRR1913139	A2058 SRR1913139	Melanoma	A2058
SRR1810079	LNCaP SRR1810079	Prostate adenocarcinoma	LNCaP
SRR1810082	BicR SRR1810082	Tongue squamous carcinoma	BicR
SRR1575597	HeLa SRR1575597	Cervical cancer	HeLa
ERR227915	MCF7 ERR227915	Breast adenocarcinoma	MCF7
ERR227916	MCF7 ERR227916	Breast adenocarcinoma	MCF7
ERR227917	MCF7 ERR227917	Breast adenocarcinoma	MCF7
SRR1535276	HDMYZ SRR1535276	Hodgkin lymphoma	HDMYZ
SRR1535278	HDMYZ SRR1535278	Hodgkin lymphoma	HDMYZ
DRR000555	THP1 DRR000555	Monocytic leukemia	THP-1
DRR000559	THP1 DRR000559	Monocytic leukemia	THP-1
SRR1304304	HeLa SRR1304304	Cervical cancer	HeLa
SRR1304307	C8166 SRR1304307	T cell leukemia	C8166
SRR1304309	A549 SRR1304309	Lung Adenocarcinoma	A549
SRR1304311	SH-SY5Y SRR1304311	Neuroblastoma	SH-SY5Y
SRR1304313	LCL B-lymphocyte SRR1304313	B cell lymphoblastoid	LCLB-cell
SRR1532965	Hela SRR1532965	Cervical cancer	Hela
SRR1532966	Hela SRR1532966	Cervical cancer	Hela
SRR1240814	A549 SRR1240814	Lung Adenocarcinoma	A549
SRR1240815	A549 SRR1240815	Lung Adenocarcinoma	A549
SRR1240812	HeLa SRR1240812	Cervical cancer	HeLa
SRR1240813	HeLa SRR1240813	Cervical cancer	HeLa
SRR1240816	HEK293 SRR1240816	Embryonic kidney	HEK293
SRR1240817	HEK293 SRR1240817	Embryonic kidney	HEK293
SRR1264358	HCT116 SRR1264358	Colon adenocarcinoma	HCT116
SRR1292458	Jurkat SRR1292458	T cell leukemia	Jurkat
SRR1292461	Jurkat SRR1292461	T cell leukemia	Jurkat
SRR1292463	Jurkat SRR1292463	T cell leukemia	Jurkat
SRR1159512	Beas-2B SRR1159512	Immortalized Bronch. Epi	Beas-2B
SRR029124	Hela SRR029124	Cervical cancer	Hela
SRR029125	U2OS SRR029125	Osteosarcoma	U2OS
SRR029126	143B SRR029126	Osteosarcoma	143B
SRR029127	A549 SRR029127	Lung Adenocarcinoma	A549
SRR029128	H520 SRR029128	Lung squamous carcinoma	H520
SRR029129	SW480 SRR029129	Colon adenocarcinoma	SW480
SRR029130	DLD2 SRR029130	Colon adenocarcinoma	DLD2
SRR029131	MCF7 SRR029131	Breast adenocarcinoma	MCF7
SRR515902	HEK293 SRR515902	Embryonic kidney	HEK293
SRR873382	MCF7 SRR873382	Breast adenocarcinoma	MCF7
SRR873383	MCF7 SRR873383	Breast adenocarcinoma	MCF7
SRR596003	MIHA SRR596003	Immortalized Hepatocyte cell	MIHA
SRR609258	HepG2 SRR609258	Hepatocellular carcinoma	HepG2
SRR020286	IMR90 SRR020286	Fibroblast strain	IMR90
SRR1732015	Fadu SRR1732015	Hypopharnyx squamous carcinoma	Fadu
SRR433866	Mammary_Epithelial SRR433866	Immort. Mammary Epi	Mammary_Epithelial
SRR433867	Mammary_Epithelial SRR433867	Immort. Mammary Epi	Mammary_Epithelial
SRR433868	Mammary_Epithelial SRR433868	Immort. Mammary Epi	Mammary_Epithelial
SRR1013967	A549 SRR1013967	Lung Adenocarcinoma	A549
SRR1013968	A549 SRR1013968	Lung Adenocarcinoma	A549
SRR1013971	H460 SRR1013971	Lung non-small cell cancer	H460
SRR1013972	H460 SRR1013972	Lung non-small cell cancer	H460
SRR1013975	H520 SRR1013975	Lung squamous carcinoma	H520
SRR1013976	H520 SRR1013976	Lung squamous carcinoma	H520
SRR1013979	H1264 SRR1013979	Lung Adenocarcinoma	H1264
SRR1013980	H1264 SRR1013980	Lung Adenocarcinoma	H1264
SRR1013983	RVH6849 SRR1013983	Lung cancer	RVH6849
SRR1013984	RVH6849 SRR1013984	Lung cancer	RVH6849
SRR1532969	C8166 SRR1532969	T cell leukemia	C8166
SRR1532970	C8166 SRR1532970	T cell leukemia	C8166
SRR2960037	HELF977 SRR2960037	Embryonic lung fibroblast	HELF977
SRR2960040	HAF1608 SRR2960040	Adult skin fibroblast	HAF1608
SRR029054	MCF7 SRR029054	Breast adenocarcinoma	MCF7
SRR960732	MDA-DB-231 SRR960732	Breast adenocarcinoma	MDA-DB-231
SRR960734	MCF-10A SRR960734	Breast Epithelium	MCF10A
SRR1290784	SUP-T1 SRR1290784	T cell lymphoma	SUP-T1
SRR1290785	SUP-T1 SRR1290785	T cell lymphoma	SUP-T1
SRR1290786	SUP-T1 SRR1290786	T cell lymphoma	SUP-T1
SRR1290793	SUP-T1 SRR1290793	T cell lymphoma	SUP-T1
SRR1290794	SUP-T1 SRR1290794	T cell lymphoma	SUP-T1
SRR1290795	SUP-T1 SRR1290795	T cell lymphoma	SUP-T1
SRR1290802	SUP-T1 SRR1290802	T cell lymphoma	SUP-T1
SRR1290803	SUP-T1 SRR1290803	T cell lymphoma	SUP-T1
SRR1564522	NP460 SRR1564522	Nasopharyngeal epithelial cell	NP460
SRR1564521	HK1 SRR1564521	Nasopharyngeal carcinoma	HK1
