# Supplementary material for: Toward the human cellular microRNAome
Source: HighWire-hosted journal article supplement (doi:10.1101/gr.222067.117), 2017-09-06
Supplement: Supplemental_Table_S6.xlsx [file Supplemental_Table_S6.xlsx]

## Sheet: Sheet1
miRNA	1000+ RPM in each of 46 cell types	100+ RPM in each of 46 cell types
hsa-miR-107/103a-3p/103b	46	46
hsa-miR-191-5p	46	46
hsa-miR-21-5p	46	46
hsa-miR-92a-3p	46	46
hsa-miR-26a-5p	45	46
hsa-miR-181a-5p	44	46
hsa-let-7a-5p/7c-5p	44	45
hsa-let-7f-5p	44	44
hsa-let-7g-5p	44	44
hsa-miR-26b-5p	43	46
hsa-let-7i-5p	42	44
hsa-miR-16-5p	41	46
hsa-miR-30d-5p	41	46
hsa-miR-25-3p	40	46
hsa-miR-423-5p	40	45
hsa-let-7b-5p	39	44
hsa-miR-221-3p	38	45
hsa-miR-27a-3p/27b-3p	38	45
hsa-let-7e-5p	38	43
hsa-miR-22-3p	37	44
hsa-miR-28-3p	37	44
hsa-miR-30e-5p	37	44
hsa-miR-423-3p	37	44
hsa-miR-29a-3p	37	41
hsa-miR-101-3p	36	46
hsa-miR-181b-5p	35	45
hsa-miR-148a-3p	35	43
hsa-miR-186-5p	35	42
hsa-miR-320a/320b/320c/320d	34	45
hsa-miR-222-3p	34	43
hsa-miR-30b-5p/30c-5p	34	43
hsa-miR-140-3p	33	46
hsa-miR-151b/151a-5p	33	43
hsa-miR-125a-5p	33	37
hsa-miR-151a-3p	32	45
hsa-miR-148b-3p	32	44
hsa-miR-92b-3p	32	40
hsa-let-7d-5p	31	44
hsa-miR-99b-5p	31	37
hsa-miR-378a-3p/378c/378d/378e	29	42
hsa-miR-98-5p	28	43
hsa-miR-10a-5p	28	38
hsa-miR-30a-5p	28	36
hsa-miR-127-3p	28	32
hsa-miR-23a-3p	27	44
hsa-miR-24-3p	27	44
hsa-miR-125b-5p	27	34
hsa-miR-93-5p	25	45
hsa-miR-215-5p/192-5p	24	45
hsa-miR-21-3p	24	35
hsa-miR-100-5p	24	31
hsa-miR-23b-3p	23	45
hsa-miR-130a-3p	23	37
hsa-miR-143-3p	23	33
hsa-miR-10b-5p	22	29
hsa-miR-20a-5p	21	36
hsa-miR-31-5p	21	29
hsa-miR-146b-5p	19	42
hsa-miR-17-5p/106a-5p	19	40
hsa-miR-486-3p/486-5p	19	37
hsa-miR-374b-5p	19	34
hsa-miR-155-5p	19	33
hsa-miR-199a-3p	19	32
hsa-miR-411-5p	16	27
hsa-miR-142-5p	16	18
hsa-miR-99a-5p	15	34
hsa-miR-182-5p	15	26
hsa-miR-146a-5p	15	25
hsa-miR-30e-3p	14	43
hsa-miR-409-3p	14	29
hsa-miR-125b-1-3p	14	25
hsa-miR-4532	14	24
hsa-miR-199a-5p	14	19
hsa-miR-128-3p	13	46
hsa-miR-342-3p	13	42
hsa-let-7b-3p	13	35
hsa-miR-1307-5p	13	33
hsa-miR-221-5p	13	32
hsa-miR-654-3p	13	27
hsa-miR-199b-3p	13	22
hsa-miR-185-5p	13	20
hsa-miR-484	12	38
hsa-miR-335-3p	12	28
hsa-miR-424-5p	12	26
hsa-miR-204-5p	12	20
hsa-miR-181a-3p	11	37
hsa-miR-340-5p	11	36
hsa-miR-197-3p	11	35
hsa-miR-769-5p	11	35
hsa-miR-410-3p	11	26
hsa-miR-381-3p	11	25
hsa-miR-183-5p	11	19
hsa-miR-532-5p	10	42
hsa-miR-744-5p	10	42
hsa-miR-425-5p	10	40
hsa-miR-19b-3p	10	38
hsa-miR-941	10	35
hsa-miR-363-3p	10	22
hsa-miR-138-5p	10	21
hsa-miR-199b-5p	10	15
hsa-miR-200c-3p	10	14
hsa-miR-15b-5p	9	44
hsa-miR-28-5p	9	41
hsa-miR-130b-3p	9	40
hsa-miR-181a-2-3p	9	37
hsa-miR-136-3p	9	23
hsa-miR-200b-3p	9	12
hsa-miR-15a-5p	8	44
hsa-miR-152-3p	8	36
hsa-miR-500a-3p	8	36
hsa-miR-29b-3p	8	35
hsa-miR-30a-3p	8	34
hsa-miR-210-3p	8	33
hsa-miR-335-5p	8	25
hsa-miR-34c-5p	8	22
hsa-miR-141-3p	8	16
hsa-miR-1260b	7	33
hsa-miR-301a-3p	7	33
hsa-miR-421	7	32
hsa-miR-181c-5p	7	31
hsa-miR-142-3p	7	16
hsa-miR-20b-5p	7	15
hsa-miR-205-5p	7	12
hsa-miR-193b-3p	6	32
hsa-miR-345-5p	6	31
hsa-miR-34a-5p	6	30
hsa-miR-224-5p	6	23
hsa-miR-652-3p	6	19
hsa-miR-145-5p	6	14
hsa-miR-375	6	13
hsa-miR-200a-3p	6	11
hsa-miR-203a-3p	6	10
hsa-miR-1307-3p	5	42
hsa-miR-106b-5p	5	36
hsa-miR-454-3p	5	35
hsa-miR-126-5p	5	30
hsa-miR-29c-3p	5	30
hsa-miR-9-5p	5	16
hsa-miR-126-3p	5	14
hsa-miR-150-5p	5	13
hsa-miR-223-3p	5	12
hsa-miR-7977	5	9
hsa-miR-133a-3p	5	7
hsa-miR-4510	5	6
hsa-miR-361-5p	4	39
hsa-miR-331-3p	4	33
hsa-miR-19a-3p	4	30
hsa-miR-130b-5p	4	24
hsa-miR-149-5p	4	22
hsa-miR-193a-3p	4	21
hsa-miR-18a-5p	4	19
hsa-miR-218-5p	4	14
hsa-miR-7-5p	4	14
hsa-miR-451a	4	11
hsa-miR-1-3p	4	10
hsa-miR-194-5p	4	10
hsa-miR-2277-3p	4	10
hsa-miR-429	4	10
hsa-miR-490-3p	4	9
hsa-miR-1298-5p	4	5
hsa-miR-302a-5p	4	5
hsa-miR-361-3p	3	33
hsa-miR-106b-3p	3	31
hsa-miR-660-5p	3	31
hsa-let-7a-3p	3	30
hsa-miR-501-3p	3	28
hsa-miR-4286	3	25
hsa-miR-125b-2-3p	3	24
hsa-miR-132-3p	3	23
hsa-miR-4454	3	20
hsa-miR-432-5p	3	19
hsa-miR-328-3p	3	18
hsa-miR-134-5p	3	16
hsa-miR-214-3p	3	15
hsa-miR-338-3p	3	10
hsa-miR-340-3p	3	10
hsa-miR-146b-3p	3	8
hsa-miR-184	3	7
hsa-miR-302b-3p	3	6
hsa-miR-302d-3p	3	6
hsa-miR-6865-5p	3	6
hsa-miR-302a-3p	3	5
hsa-miR-302c-3p	3	5
hsa-miR-509-3p	3	4
hsa-miR-509-5p	3	3
hsa-miR-574-3p	2	32
hsa-let-7d-3p	2	29
hsa-miR-181d-5p	2	23
hsa-miR-301b-3p	2	22
hsa-miR-424-3p	2	22
hsa-miR-455-5p	2	21
hsa-miR-193a-5p	2	20
hsa-miR-584-5p	2	20
hsa-miR-17-3p	2	19
hsa-miR-374a-5p	2	19
hsa-miR-455-3p	2	19
hsa-miR-339-5p	2	17
hsa-miR-889-3p	2	17
hsa-miR-342-5p	2	14
hsa-miR-493-5p	2	13
hsa-miR-140-5p	2	12
hsa-miR-25-5p	2	12
hsa-miR-382-5p	2	12
hsa-miR-615-3p	2	12
hsa-miR-503-5p	2	11
hsa-miR-135a-5p	2	9
hsa-miR-485-5p	2	8
hsa-miR-504-5p	2	8
hsa-miR-139-5p	2	7
hsa-miR-18b-5p	2	6
hsa-miR-217	2	6
hsa-miR-625-3p	2	6
hsa-miR-9-3p	2	6
hsa-miR-133b	2	5
hsa-miR-153-3p	2	5
hsa-miR-379-5p	2	5
hsa-miR-219a-1-3p	2	4
hsa-miR-590-5p	2	4
hsa-miR-206	2	3
hsa-miR-219a-2-3p	2	3
hsa-miR-302c-5p	2	3
hsa-miR-302f	2	3
hsa-miR-202-3p	2	2
hsa-miR-202-5p	2	2
hsa-miR-211-5p	2	2
hsa-miR-372-3p	2	2
hsa-miR-374a-3p	1	30
hsa-miR-365b-3p	1	24
hsa-miR-574-5p	1	23
hsa-miR-708-5p	1	23
hsa-miR-24-2-5p	1	22
hsa-miR-450b-5p	1	20
hsa-miR-148a-5p	1	19
hsa-miR-1275	1	18
hsa-miR-181c-3p	1	17
hsa-miR-425-3p	1	17
hsa-miR-1180-3p	1	15
hsa-miR-31-3p	1	15
hsa-miR-450a-5p	1	15
hsa-miR-196a-5p	1	14
hsa-miR-874-3p	1	14
hsa-miR-323a-3p	1	13
hsa-miR-330-3p	1	13
hsa-miR-99b-3p	1	13
hsa-miR-324-5p	1	12
hsa-miR-369-5p	1	12
hsa-miR-370-3p	1	12
hsa-miR-758-3p	1	12
hsa-miR-887-3p	1	12
hsa-miR-494-3p	1	11
hsa-miR-542-3p	1	11
hsa-miR-5100	1	10
hsa-miR-1185-1-3p	1	9
hsa-miR-143-5p	1	9
hsa-miR-323b-3p	1	9
hsa-miR-493-3p	1	9
hsa-miR-96-5p	1	9
hsa-miR-193b-5p	1	8
hsa-miR-214-5p	1	8
hsa-miR-32-5p	1	8
hsa-miR-483-5p	1	8
hsa-miR-766-3p	1	8
hsa-miR-129-5p	1	7
hsa-miR-150-3p	1	7
hsa-miR-483-3p	1	7
hsa-miR-124-3p	1	6
hsa-miR-132-5p	1	6
hsa-miR-33a-5p	1	6
hsa-miR-495-3p	1	6
hsa-miR-95-3p	1	6
hsa-miR-1251-5p	1	5
hsa-miR-1269a	1	5
hsa-miR-216b-5p	1	5
hsa-miR-326	1	5
hsa-miR-378a-5p	1	5
hsa-miR-1249-3p	1	4
hsa-miR-329-3p	1	4
hsa-miR-433-3p	1	4
hsa-miR-449c-5p	1	4
hsa-miR-551b-3p	1	4
hsa-miR-589-3p	1	4
hsa-miR-654-5p	1	4
hsa-miR-670-3p	1	4
hsa-miR-1224-5p	1	3
hsa-miR-208b-3p	1	3
hsa-miR-223-5p	1	3
hsa-miR-382-3p	1	3
hsa-miR-449a	1	3
hsa-miR-508-3p	1	3
hsa-miR-543	1	3
hsa-miR-548ao-3p	1	3
hsa-miR-133a-5p	1	2
hsa-miR-144-3p	1	2
hsa-miR-144-5p	1	2
hsa-miR-1-5p	1	2
hsa-miR-1908-5p	1	2
hsa-miR-204-3p	1	2
hsa-miR-367-3p	1	2
hsa-miR-371a-5p	1	2
hsa-miR-373-3p	1	2
hsa-miR-511-5p	1	2
hsa-miR-7-1-3p	1	2
hsa-miR-758-5p	1	2
hsa-miR-885-5p	1	2
hsa-miR-1270	1	1
hsa-miR-302b-5p	1	1
hsa-miR-302e	1	1
hsa-miR-3135b	1	1
hsa-miR-370-5p	1	1
hsa-miR-3713	1	1
hsa-miR-3960	1	1
hsa-miR-4433b-5p	1	1
hsa-miR-4446-3p	1	1
hsa-miR-512-3p	1	1
hsa-miR-515-3p	1	1
hsa-miR-515-5p	1	1
hsa-miR-520d-5p	1	1
hsa-miR-548f-3p	1	1
hsa-miR-6077	1	1
hsa-miR-6081	1	1
hsa-miR-339-3p		34
hsa-miR-671-3p		30
hsa-miR-589-5p		23
hsa-miR-708-3p		20
hsa-miR-1271-5p		19
hsa-miR-877-5p		19
hsa-miR-148b-5p		18
hsa-miR-16-2-3p		18
hsa-miR-196b-5p		18
hsa-miR-27b-5p		18
hsa-miR-452-5p		17
hsa-miR-3615		16
hsa-miR-100-3p		15
hsa-miR-222-5p		15
hsa-miR-98-3p		15
hsa-miR-190a-5p		14
hsa-miR-487b-3p		14
hsa-miR-27a-5p		13
hsa-miR-330-5p		13
hsa-miR-409-5p		13
hsa-miR-431-5p		13
hsa-miR-92a-1-5p		13
hsa-miR-195-5p		12
hsa-miR-505-3p		12
hsa-miR-598-3p		12
hsa-miR-7706		12
hsa-miR-1260a		11
hsa-miR-135b-5p		11
hsa-miR-136-5p		11
hsa-miR-145-3p		11
hsa-miR-22-5p		11
hsa-miR-26a-2-3p		11
hsa-miR-369-3p		11
hsa-miR-539-3p		11
hsa-miR-15b-3p		10
hsa-miR-30d-3p		10
hsa-miR-376c-3p		10
hsa-miR-502-3p		10
hsa-miR-561-5p		10
hsa-miR-7974		10
hsa-miR-127-5p		9
hsa-miR-1301-3p		9
hsa-miR-299-3p		9
hsa-miR-337-3p		9
hsa-miR-362-5p		9
hsa-miR-497-5p		9
hsa-miR-629-5p		9
hsa-miR-129-2-3p		8
hsa-miR-1296-5p		8
hsa-miR-141-5p		8
hsa-miR-365a-3p		8
hsa-miR-671-5p		8
hsa-miR-7704		8
hsa-miR-93-3p		8
hsa-miR-935		8
hsa-miR-1247-5p		7
hsa-miR-1292-5p		7
hsa-miR-1304-3p		7
hsa-miR-411-3p		7
hsa-miR-487a-3p		7
hsa-miR-582-3p		7
hsa-miR-590-3p		7
hsa-miR-664a-3p		7
hsa-miR-664a-5p		7
hsa-miR-92b-5p		7
hsa-miR-10a-3p		6
hsa-miR-200a-5p		6
hsa-miR-212-5p		6
hsa-miR-296-3p		6
hsa-miR-29a-5p		6
hsa-miR-376a-5p		6
hsa-miR-485-3p		6
hsa-miR-532-3p		6
hsa-miR-577		6
hsa-miR-582-5p		6
hsa-miR-625-5p		6
hsa-miR-656-3p		6
hsa-miR-766-5p		6
hsa-miR-873-3p		6
hsa-miR-1247-3p		5
hsa-miR-1303		5
hsa-miR-1304-5p		5
hsa-miR-139-3p		5
hsa-miR-18a-3p		5
hsa-miR-210-5p		5
hsa-miR-2110		5
hsa-miR-23a-5p		5
hsa-miR-324-3p		5
hsa-miR-33a-3p		5
hsa-miR-376a-3p		5
hsa-miR-377-5p		5
hsa-miR-4485-3p		5
hsa-miR-4521		5
hsa-miR-873-5p		5
hsa-miR-944		5
hsa-miR-103a-2-5p		4
hsa-miR-1268b		4
hsa-miR-1269b		4
hsa-miR-1285-3p		4
hsa-miR-137		4
hsa-miR-1468-5p		4
hsa-miR-147b		4
hsa-miR-149-3p		4
hsa-miR-185-3p		4
hsa-miR-18b-3p		4
hsa-miR-190a-3p		4
hsa-miR-212-3p		4
hsa-miR-216a-3p		4
hsa-miR-216a-5p		4
hsa-miR-23b-5p		4
hsa-miR-30c-2-3p		4
hsa-miR-3200-3p		4
hsa-miR-338-5p		4
hsa-miR-3607-3p		4
hsa-miR-3609		4
hsa-miR-3613-5p		4
hsa-miR-365a-5p		4
hsa-miR-374b-3p		4
hsa-miR-377-3p		4
hsa-miR-454-5p		4
hsa-miR-4723-5p		4
hsa-miR-501-5p		4
hsa-miR-6087		4
hsa-miR-663a		4
hsa-miR-675-5p		4
hsa-miR-767-5p		4
hsa-miR-7976		4
hsa-miR-1197		3
hsa-miR-1246		3
hsa-miR-125a-3p		3
hsa-miR-187-3p		3
hsa-miR-191-3p		3
hsa-miR-196a-3p		3
hsa-miR-2682-5p		3
hsa-miR-26b-3p		3
hsa-miR-29b-1-5p		3
hsa-miR-29b-2-5p		3
hsa-miR-29c-5p		3
hsa-miR-30b-3p		3
hsa-miR-365b-5p		3
hsa-miR-4443		3
hsa-miR-4455		3
hsa-miR-448		3
hsa-miR-4484		3
hsa-miR-4492		3
hsa-miR-4515		3
hsa-miR-509-3-5p		3
hsa-miR-548av-5p/548k		3
hsa-miR-548e-3p		3
hsa-miR-628-5p		3
hsa-miR-6724-5p		3
hsa-miR-760		3
hsa-miR-940		3
hsa-let-7f-1-3p		2
hsa-miR-105-5p		2
hsa-miR-106a-3p		2
hsa-miR-1226-3p		2
hsa-miR-1248		2
hsa-miR-1273h-3p		2
hsa-miR-1291		2
hsa-miR-1306-5p		2
hsa-miR-135a-3p		2
hsa-miR-135b-3p		2
hsa-miR-138-1-3p		2
hsa-miR-152-5p		2
hsa-miR-188-5p		2
hsa-miR-1908-3p		2
hsa-miR-1976		2
hsa-miR-208a-3p		2
hsa-miR-20b-3p		2
hsa-miR-219b-3p		2
hsa-miR-219b-5p		2
hsa-miR-224-3p		2
hsa-miR-296-5p		2
hsa-miR-302d-5p		2
hsa-miR-3117-3p		2
hsa-miR-3150b-3p		2
hsa-miR-3174		2
hsa-miR-3182		2
hsa-miR-3195		2
hsa-miR-32-3p		2
hsa-miR-331-5p		2
hsa-miR-34a-3p		2
hsa-miR-34b-5p		2
hsa-miR-3605-3p		2
hsa-miR-3607-5p		2
hsa-miR-3620-3p		2
hsa-miR-362-3p		2
hsa-miR-3653-5p		2
hsa-miR-3656		2
hsa-miR-378g		2
hsa-miR-379-3p		2
hsa-miR-383-5p		2
hsa-miR-3907		2
hsa-miR-3909		2
hsa-miR-412-5p		2
hsa-miR-4284		2
hsa-miR-4326		2
hsa-miR-4429		2
hsa-miR-4433b-3p		2
hsa-miR-449b-5p		2
hsa-miR-4687-5p		2
hsa-miR-4767		2
hsa-miR-4784		2
hsa-miR-490-5p		2
hsa-miR-499a-5p		2
hsa-miR-511-3p		2
hsa-miR-513c-5p		2
hsa-miR-514a-3p		2
hsa-miR-542-5p		2
hsa-miR-545-3p		2
hsa-miR-548ap-5p/548j-5p		2
hsa-miR-548p		2
hsa-miR-549a		2
hsa-miR-585-3p		2
hsa-miR-592		2
hsa-miR-636		2
hsa-miR-652-5p		2
hsa-miR-665		2
hsa-miR-668-3p		2
hsa-miR-6852-5p		2
hsa-miR-6869-5p		2
hsa-miR-7641		2
hsa-miR-8485		2
hsa-miR-877-3p		2
hsa-miR-891a-5p		2
hsa-let-7e-3p		1
hsa-let-7f-2-3p		1
hsa-let-7g-3p		1
hsa-let-7i-3p		1
hsa-miR-1179		1
hsa-miR-1185-2-3p		1
hsa-miR-1185-5p		1
hsa-miR-1228-3p		1
hsa-miR-124-5p		1
hsa-miR-1255a		1
hsa-miR-1257		1
hsa-miR-1266-5p		1
hsa-miR-1272		1
hsa-miR-1273c		1
hsa-miR-1277-5p		1
hsa-miR-128-1-5p		1
hsa-miR-1283		1
hsa-miR-1287-5p		1
hsa-miR-129-1-3p		1
hsa-miR-1299		1
hsa-miR-1323		1
hsa-miR-153-5p		1
hsa-miR-1537-3p		1
hsa-miR-155-3p		1
hsa-miR-15a-3p		1
hsa-miR-181b-3p		1
hsa-miR-186-3p		1
hsa-miR-1915-3p		1
hsa-miR-194-3p		1
hsa-miR-19b-1-5p		1
hsa-miR-200b-5p		1
hsa-miR-203a-5p		1
hsa-miR-205-3p		1
hsa-miR-208a-5p		1
hsa-miR-20a-3p		1
hsa-miR-2113		1
hsa-miR-211-3p		1
hsa-miR-2116-3p		1
hsa-miR-2117		1
hsa-miR-218-2-3p		1
hsa-miR-219a-5p		1
hsa-miR-2355-5p		1
hsa-miR-23c		1
hsa-miR-24-1-5p		1
hsa-miR-299-5p		1
hsa-miR-301a-5p		1
hsa-miR-30c-1-3p		1
hsa-miR-3141		1
hsa-miR-3151-5p		1
hsa-miR-3177-3p		1
hsa-miR-3196		1
hsa-miR-320e		1
hsa-miR-33b-3p		1
hsa-miR-33b-5p		1
hsa-miR-34b-3p		1
hsa-miR-3611		1
hsa-miR-3613-3p		1
hsa-miR-3620-5p		1
hsa-miR-3675-5p		1
hsa-miR-367-5p		1
hsa-miR-3687		1
hsa-miR-3690		1
hsa-miR-371a-3p		1
hsa-miR-371b-5p		1
hsa-miR-378b		1
hsa-miR-378f		1
hsa-miR-380-5p		1
hsa-miR-381-5p		1
hsa-miR-3913-5p		1
hsa-miR-4306		1
hsa-miR-4312		1
hsa-miR-431-3p		1
hsa-miR-4417		1
hsa-miR-4433a-3p		1
hsa-miR-4433a-5p		1
hsa-miR-4466		1
hsa-miR-4488		1
hsa-miR-4516		1
hsa-miR-4518		1
hsa-miR-4634		1
hsa-miR-4638-3p		1
hsa-miR-4649-5p		1
hsa-miR-4732-3p		1
hsa-miR-4745-5p		1
hsa-miR-4763-3p		1
hsa-miR-4775		1
hsa-miR-488-3p		1
hsa-miR-488-5p		1
hsa-miR-489-3p		1
hsa-miR-491-5p		1
hsa-miR-497-3p		1
hsa-miR-499a-3p		1
hsa-miR-5009-3p		1
hsa-miR-500a-5p		1
hsa-miR-500b-5p		1
hsa-miR-5010-3p		1
hsa-miR-502-5p		1
hsa-miR-506-3p		1
hsa-miR-508-5p		1
hsa-miR-512-5p		1
hsa-miR-513a-5p		1
hsa-miR-516a-5p		1
hsa-miR-516b-5p		1
hsa-miR-517-5p		1
hsa-miR-517b-3p		1
hsa-miR-517c-3p		1
hsa-miR-5189-5p		1
hsa-miR-518a-3p		1
hsa-miR-518b		1
hsa-miR-518c-3p		1
hsa-miR-518e-3p		1
hsa-miR-518e-5p		1
hsa-miR-518f-3p		1
hsa-miR-519a-3p		1
hsa-miR-519b-3p		1
hsa-miR-519c-3p		1
hsa-miR-519d-3p		1
hsa-miR-520a-3p		1
hsa-miR-520a-5p		1
hsa-miR-520b		1
hsa-miR-520c-3p		1
hsa-miR-520d-3p		1
hsa-miR-520e		1
hsa-miR-520f-3p		1
hsa-miR-520g-3p		1
hsa-miR-520h		1
hsa-miR-521		1
hsa-miR-522-3p		1
hsa-miR-523-3p		1
hsa-miR-525-5p		1
hsa-miR-526b-3p		1
hsa-miR-526b-5p		1
hsa-miR-527		1
hsa-miR-539-5p		1
hsa-miR-545-5p		1
hsa-miR-548l		1
hsa-miR-550a-3p		1
hsa-miR-551b-5p		1
hsa-miR-5588-5p		1
hsa-miR-561-3p		1
hsa-miR-5695		1
hsa-miR-5701		1
hsa-miR-576-5p		1
hsa-miR-597-5p		1
hsa-miR-6069		1
hsa-miR-6089		1
hsa-miR-627-5p		1
hsa-miR-642a-5p		1
hsa-miR-6503-3p		1
hsa-miR-6503-5p		1
hsa-miR-6510-3p		1
hsa-miR-651-5p		1
hsa-miR-6516-5p		1
hsa-miR-653-3p		1
hsa-miR-653-5p		1
hsa-miR-664b-5p		1
hsa-miR-6721-5p		1
hsa-miR-6735-5p		1
hsa-miR-675-3p		1
hsa-miR-6789-5p		1
hsa-miR-6808-3p		1
hsa-miR-6810-3p		1
hsa-miR-6836-3p		1
hsa-miR-6842-3p		1
hsa-miR-6879-5p		1
hsa-miR-6894-3p		1
hsa-miR-7705		1
hsa-miR-885-3p		1
hsa-miR-934		1
hsa-miR-942-5p		1
hsa-miR-99a-3p		1
