# Supplementary material for: Toward the human cellular microRNAome
Source: HighWire-hosted journal article supplement (doi:10.1101/gr.222067.117), 2017-09-06
Supplement: Supplemental_Table_S7.xlsx [file Supplemental_Table_S7.xlsx]

## Sheet: Sheet1
FINAL JHH_miRNA_ID hairpin	FINAL JHH_miRNA_ID_dom_miRNA	FINAL JHH_miRNA_ID_passenger_miRNA	Consensus mature sequence	Consensus star sequence (real/hypothetical)	Consensus precursor sequence	Precursor coordinate hg38	Representative Sample Type	SRA number	Total Counts	Mature read counts	Loop read counts	Star read counts	TJU microRNA match	Ago microRNA match	Ortholog	Match to known miRNA	Confirmed 5p/3p Passenger Strand	microRNA found within gene
JHU_ID_00001	JHU_ID_00001.3p		accgcgggcucgcguggg	cgcgugauaccgccccgc	cgcgugauaccgccccgcccgcucgccgccagcccacucuacaguagccgcgcggccaggguaaccgcgggcucgcguggg	chr1:100037962-100038043	Skin	SRR2174529	9	9	0	0
JHU_ID_00002	JHU_ID_00002.3p		agcggcucggcccggcaguagugg	ggaggcaggccgggcccuca	ggaggcaggccgggcccucaagauggcggcgggcgcccagagcggcucggcccggcaguagugg	chr1:100038095-100038159	Colon adenocarcinoma	SRR1917330	48	46	2	0		Ago_1028
JHU_ID_00003	JHU_ID_00003.5p		gcuguugggugggaggcucgu	gcguuucccaucuccugauaggccg	gcuguugggugggaggcucguuucuucccucccuauuggucgcccagggggaggcgcguuucccaucuccugauaggccg	chr1:100249872-100249952	Kidney	SRR553575	1	1	0	0
JHU_ID_00004	JHU_ID_00004.3p		ccgcgcugggaacacugc	agucagugcgcaugcgcguagcu	agucagugcgcaugcgcguagcucggcuuaaaggagccgcgcugggaacacugc	chr1:100266120-100266174	Placenta	SRR822458	1	1	0	0						RTCA-AS1
JHU_ID_00005	JHU_ID_00005.3p		uccuccccaugggaucugga	cuggucccagguggagaga	cuggucccagguggagagacagggugaggcuccuccccaugggaucugga	chr1:1006431-1006481	Breast adenocarcinoma	SRR873382	2	2	0	0						ISG15
JHU_ID_00006	JHU_ID_00006.3p		cgagccugugauucccugugg	acaggggcaccauggcgcucuga	acaggggcaccauggcgcucugagaaagucacaccgagccugugauucccugugg	chr1:1006596-1006651	Hepatocellular carcinoma (HepG2)	ERR738413	2	2	0	0						ISG15
JHU_ID_00007	JHU_ID_00007.5p		uugcagauaaauaaauggcacc	ugccauuuauuuaucugcaauc	uugcagauaaauaaauggcaccuauucuggugacucggaauaggugccauuuauuuaucugcaauc	chr1:100714679-100714745	Adrenal	SRR944034	8	8	0	0
JHU_ID_00008	JHU_ID_00008.5p	JHU_ID_00008.3p	uucggggcaacaaacuacuagu	caguaguuagcugcucugaaca	uucggggcaacaaacuacuagugucacuaguuagcugccaguaguuagcugcucugaaca	chr1:101249757-101249817	CD4+ T Cell	SRR1532971	104	102	0	2		Ago_1033
JHU_ID_00009	JHU_ID_00009.3p		ucuggacuacagagugagac	auugcuugaacccaggag	auugcuugaacccaggagguggagguggagugagccgagauccugccacuacacuccagucuggacuacagagugagac	chr1:101317211-101317290	Plasma Cell	SRR060984	10	10	0	0
JHU_ID_00010	JHU_ID_00010.5p	JHU_ID_00010.3p	ucuuccagauguuacugacugcu	uaguuaguaacaucuggaagag	uaguuaguaacaucuggaagaguacauuuggaguaacucuuccagauguuacugacugcu	chr1:101609254-101609314	Biliosphere	ERR842917	14	9	0	5
JHU_ID_00011	JHU_ID_00011.3p		ucugcagccgugcugugcucu	ggcacagcaacagcugcagaga	ggcacagcaacagcugcagagaucugguccgcuuuaugcccucugcagccgugcugugcucu	chr1:101683763-101683825	Epithelium Prostate	SRR5127212	4	4	0	0
JHU_ID_00012	JHU_ID_00012.5p		uggccacuuguuuugcgauggu	caucacuaagcaaguggccagu	uggccacuuguuuugcgauggugauacaaauacaaauauauaucaucacuaagcaaguggccagu	chr1:10177702-10177767	Smooth Muscle Cell, Coronary	SRR5127211	3	3	0	0
JHU_ID_00013	JHU_ID_00013.3p		gaagcggggcagugugac	ggcggugucccgcgccgg	ggcggugucccgcgccggcgacugcgggcggaguuucgcgagggccgaagcggggcagugugac	chr1:10210514-10210578	Skin	SRR1259228	8	8	0	0	TJU_CMC_MD2.ID00048.5p-miR
JHU_ID_00015	JHU_ID_00015.5p		uaugugucccucccucugcgcc	ggcgggggaggcccgcugcuc	uaugugucccucccucugcgccaccuuugggcgggggaggcccgcugcuc	chr1:1024834-1024884	Blood	SRR837475	12	12	0	0						AGRN
JHU_ID_00016	JHU_ID_00016.5p		ucugagaugaccagugugguuuc	aggcaugcugggucccuuggggc	ucugagaugaccagugugguuucugaagguuugagaugaaggcaugcugggucccuuggggc	chr1:1027580-1027642	Nasopharyngeal carcinoma	SRR1564521	1	1	0	0						AGRN
JHU_ID_00017	JHU_ID_00017.5p	JHU_ID_00017.3p	acccaggauggggggguugcaguga	acugcacuccagccugggcaa	acccaggauggggggguugcagugaguugagauugugccacugcacuccagccugggcaa	chr1:10340697-10340757	Colon adenocarcinoma	SRR1917331	26	20	0	6		Ago_221
JHU_ID_00018	JHU_ID_00018.3p		ugucacagggucccggaguaga	accuccagcccugugauuca	accuccagcccugugauucagccucacguucugagggcuugugucacagggucccggaguaga	chr1:10376350-10376413	Brain, Prefrontal Cortex	SRR1759217	1	1	0	0		Ago_223
JHU_ID_00019	JHU_ID_00019.5p/.3p		cggccgaggcucugcagcgugc	cgagggcggggcugggggccgcc	cgagggcggggcugggggccgccugcccggccgaggcucugcagcgugc	chr1:10399436-10399485	Retina	ERR973615	3	3	0	0						PGD
JHU_ID_00020	JHU_ID_00020.3p	JHU_ID_00020.5p	uuaggagcugcauucgcgcguuc	aucgcgcgauucagccuaggag	aucgcgcgauucagccuaggaguuguuuuuaacuuuuaggagcugcauucgcgcguuc	chr1:10472689-10472747	Cervical cancer	SRR1304304	4	3	0	1
JHU_ID_00022	JHU_ID_00022.3p		gucccuguucaggcacca	gcaagugaaaguggucug	gcaagugaaaguggucugaugguacucaccacuuggugauagucccuguucaggcacca	chr1:105109618-105109677	T cell leukemia	SRR1292461	182	182	0	0
JHU_ID_00023	JHU_ID_00023.3p	JHU_ID_00023.5p	uguggacccagggaccucugaa	guggggccucugacuuccauaga	guggggccucugacuuccauagaccgugggacugugacuucuguggacccagggaccucugaa	chr1:10511644-10511707	Lung Adenocarcinoma	SRR1013968	50	48	0	2						PEX14
JHU_ID_00024	JHU_ID_00024.3p		gauccagguugugacaugcug	ucaugucucagccuggaacuc	ucaugucucagccuggaacuccacugugugcuguggucaggggauccagguugugacaugcug	chr1:10515796-10515859	Lung	SRR1608275	8	8	0	0						PEX14
JHU_ID_00025	JHU_ID_00025.5p		gaggguagaaacgaugcc	cacucaaggcucucccucuu	gaggguagaaacgaugccccacauccuacuuguagagaguggugaugugaugggcacucaaggcucucccucuu	chr1:10596596-10596670	Plasma	SRR822445	66	66	0	0						PEX14
JHU_ID_00026	JHU_ID_00026.5p/.3p		gccagggccuggggcuccc	guggcgcuggacuggccu	guggcgcuggacuggccuagacucugugcagacacagaagagccagggccuggggcuccc	chr1:1060612-1060672	Neuron iPSC	SRR1777169	4	4	0	0
JHU_ID_00029	JHU_ID_00029.3p		ucccuugccuuggaacug	ggcccagugugcagggacc	ggcccagugugcagggaccaugagggucccuugccuuggaacug	chr1:10643590-10643634	Retina	ERR973617	2	2	0	0						RP4-734G22.3
JHU_ID_00030	JHU_ID_00030.3p		cggagccuggagggcugugug	ggcagccccucaaggccacgag	ggcagccccucaaggccacgaggaucagugcucggagccuggagggcugugug	chr1:1065347-1065400	Hepatocellular carcinoma (HepG2)	ERR738404	1	1	0	0
JHU_ID_00031	JHU_ID_00031.3p		accccaccccuccucccuccagg	ucccuggggcuggggcuggggcug	ucccuggggcuggggcuggggcuggggcugggacugucacccacagcagggcccugaccccaccccuccucccuccagg	chr1:10656735-10656814	Retina	ERR973605	2	2	0	0		Ago_228
JHU_ID_00032	JHU_ID_00032.5p/.3p		ggggguguggaggggacggu	aggcccacuccgcuccccgu	aggcccacuccgcuccccgucagcugcgggcagagcuggccuggguggggguguggaggggacggu	chr1:10663885-10663951	BrainPrefrontalCortex	SRR1759216	2	2	0	0		Ago_229
JHU_ID_00033	JHU_ID_00033.3p		cuagccucuggggucagggag	cucuggccccacgggcucuggc	cucuggccccacgggcucuggcgcagcaccaggguauggccuagccucuggggucagggag	chr1:10668628-10668689	Lung	SRR1608273	3	3	0	0
JHU_ID_00034	JHU_ID_00034.5p		cugacuggcugugcccacaggggcc	caguggcagagccaggcagua	cugacuggcugugcccacaggggccucagcgagaggcaguggcagagccaggcagua	chr1:10676909-10676966	Retina	ERR973618	2	2	0	0
JHU_ID_00035	JHU_ID_00035.3p		ccugggcucuggggucagggaugg	cacccuggaccagaggcccagcug	cacccuggaccagaggcccagcugguuggagcaggaaguaccugggcucuggggucagggaugg	chr1:1070249-1070313	Monocytic leukemia	SRR2296788	1	1	0	0
JHU_ID_00037	JHU_ID_00037.3p		ucgggcagggccacugggaa	acuagggguccugcccaaga	acuagggguccugcccaagaagaucgggcagggccacugggaa	chr1:10710412-10710455	Retina	ERR973611	2	2	0	0
JHU_ID_00039	JHU_ID_00039.5p		uugcagccggauccaagc	ggggaccggcagccgcc	uugcagccggauccaagcucucuguggccaggccacagggccucugggcagagcaguggggaccggcagccgcc	chr1:10720025-10720099	Epithelium Retinal Pigment	SRR493013	4	4	0	0
JHU_ID_00041	JHU_ID_00041.5p		agggaggaggagggcggug	ccaccuuuuccucgugcc	agggaggaggagggcgguguaguccuccaggcuggccaggcuggggccgguggaggaugccaccuuuuccucgugcc	chr1:10726448-10726525	Colon adenocarcinoma	SRR1917323	2	2	0	0
JHU_ID_00042	JHU_ID_00042.3p		caggccuggcuggaaucucu	ugaggccaggccagggacuggg	ugaggccaggccagggacuggggagagaauggacucaggccuggcuggaaucucu	chr1:10742449-10742504	Retina	ERR973612	2	2	0	0
JHU_ID_00044	JHU_ID_00044.3p		aggcucgcacuagacucagc	ugagugaagugugagccuag	ugagugaagugugagccuagugaauaacacuaggcucgcacuagacucagc	chr1:107877846-107877897	Macrophage	SRR1532975	10	10	0	0						VAV3
JHU_ID_00045	JHU_ID_00045.3p		cggggccgggggggggggg	ccccccaaccccaccccucc	ccccccaaccccaccccuccacauuuccauuuacuuugugugcggggccgggggggggggg	chr1:10792328-10792389	Pancreas	ERR852099	2	2	0	0
JHU_ID_00047	JHU_ID_00047.5p		ugggcugcagcaggaaccc	gaucuuggucucagg	ugggcugcagcaggaacccccacucucagcucugccaugucaaggcucagggcagagagggagggaucuuggucucagg	chr1:10818907-10818986	Brain, Prefrontal Cortex	ERR409883	4	4	0	0
JHU_ID_00048	JHU_ID_00048.5p		uuccuaggcuguguccuccccacu	cggcacgaggaccagccucacuguucu	uuccuaggcuguguccuccccacuggccgggcaccggcuggaacggcacgaggaccagccucacuguucu	chr1:1082377-1082447	Colon adenocarcinoma	SRR1917330	18	18	0	0						C1orf159
JHU_ID_00049	JHU_ID_00049.5p	JHU_ID_00049.3p	ggaguuauaucugaagacugcu	cagucuucagaccuaacuccua	cagucuucagaccuaacuccuaaaauucaauaggaguuauaucugaagacugcu	chr1:108274253-108274307	Hepatocellular carcinoma	SRR609258	60	44	0	16		Ago_1047
JHU_ID_00050	JHU_ID_00050.3p		cccucugucuggaauagacugc	agucuauuccagguagacaggc	agucuauuccagguagacaggccugcaggggguccaaccccuacaagccccucugucuggaauagacugc	chr1:108370134-108370204	Breast adenocarcinoma	ERR227917	1	1	0	0
JHU_ID_00051	JHU_ID_00051.5p	JHU_ID_00051.3p	ggaguuauaucugaagacugcu	cagucuucagaccuaacuccua	cagucuucagaccuaacuccuaaaauucaauaggaguuauaucugaagacugcu	chr1:108420073-108420127	Hepatocellular carcinoma	SRR609258	60	44	0	16		Ago_1051				NBPF6
JHU_ID_00053	JHU_ID_00053.3p		cugugagcucaggggaccugga	ugggcuccacugggcucagcagcc	ugggcuccacugggcucagcagccuccccuccaggcugugagcucaggggaccugga	chr1:10900212-10900269	Breast adenocarcinoma	ERR227915	2	2	0	0
JHU_ID_00054	JHU_ID_00054.3p		agcuugacugaucccuggag	ccaucacuucucugg	ccaucacuucucuggccuccccaguccucugggucuggggucccagcuugacugaucccuggag	chr1:10907879-10907943	Plasma	SRR822446	9	9	0	0
JHU_ID_00055	JHU_ID_00055.5p		ccgggcugggagggggcggg	cggccccgcccgccacguuu	ccgggcugggagggggcggggagaacggccacgucagucccggccccgcccgccacguuu	chr1:109090930-109090990	Skin	SRR1259236	1	1	0	0						TMEM167B
JHU_ID_00056	JHU_ID_00056.5p		agggaugcagcagaaauu	uuucacuugcauuagccuagc	agggaugcagcagaaauuauggaggaguccuagguuucacuugcauuagccuagc	chr1:109198088-109198143	Smooth Muscle Cell, Coronary	SRR5127211	3	3	0	0						KIAA1324
JHU_ID_00058	JHU_ID_00058.5p		accagaggagcugacguggccugg	agggcugucagcuccccggagaa	accagaggagcugacguggccuggaugaccaggacguacucaggccgguccucguagucuaagucuaccagggcugucagcuccccggagaa	chr1:109252998-109253090	Neuron iPSC	SRR1777161	2	2	0	0						CELSR2
JHU_ID_00059	JHU_ID_00059.3p		ucccucccugccuggcccugc	aggggcuaagagaggcaaag	aggggcuaagagaggcaaagggagagagaccccaaaagcccacccucuccaccuucccucccugccuggcccugc	chr1:109262483-109262558	Retina	ERR973615	3	3	0	0						CELSR2
JHU_ID_00060	JHU_ID_00060.5p		augguggggaugucaggugug	guugugagcacacccaccguga	augguggggaugucagguguggguugugagcacacccaccguga	chr1:109268522-109268566	Breast adenocarcinoma	SRR873383	224	224	0	0						CELSR2
JHU_ID_00062	JHU_ID_00062.5p/.3p		caggguucagugcggacuccucc	aggcugccuggaucccccaggc	aggcugccuggaucccccaggccagggggcccuuggccaggguucagugcggacuccucc	chr1:109272639-109272699	Colon adenocarcinoma	SRR1917330	73	71	2	0	TJU_CMC_MD2.ID00178.5p-miR	Ago_1061				CELSR2
JHU_ID_00064	JHU_ID_00064.5p/.3p		ucugcaccccaagcaacagag	uuguugcuuggggugcacagu	ucugcaccccaagcaacagagucugacuuuguugcuuggggugcacagu	chr1:109482244-109482293	Brain, Cerebellum	SRR553573	14	14	0	0
JHU_ID_00065	JHU_ID_00065.3p		uccugggcagaaggugggaacag	gaagguccagcuuaagggagg	gaagguccagcuuaagggagggcaguuaggcccacccaagggaaggggagauggguaugccccuccugggcagaaggugggaacag	chr1:109488555-109488641	CD4+ T Cell	SRR1532972	2	2	0	0						ATXN7L2
JHU_ID_00066	JHU_ID_00066.3p		ccagcugggaucucaguggcucc	agccauuagaccucagugccag	agccauuagaccucagugccagggcacucuuccuccagcugggaucucaguggcucc	chr1:109498594-109498651	Embryonic kidney	SRR1240816	5	5	0	0						CYB561D1
JHU_ID_00067	JHU_ID_00067.5p/.3p		gggcggcggaucugcagaguu	cgcugcccgccgcccaa	gggcggcggaucugcagaguuucgagguucugucaaguucgcugcccgccgcccaa	chr1:109548412-109548468	Hepatocellular carcinoma (HepG2)	ERR738405	4	4	0	0		Ago_1068
JHU_ID_00069	JHU_ID_00069.3p		uucaggaccuuccaguccauagg	gauggagugggaggacaugaagg	gauggagugggaggacaugaaggaugaggaacuaccuucaggaccuuccaguccauagg	chr1:109616497-109616556	Immort. Mammary Epi	SRR433867	2	2	0	0
JHU_ID_00070	JHU_ID_00070.5p		uagaagggccuaggcauaaggua	ccuuggccaaggaccuuuuugga	uagaagggccuaggcauaagguaugguuugggaaauugccuuggccaaggaccuuuuugga	chr1:109617130-109617191	Colon adenocarcinoma	SRR1917329	19	19	0	0		Ago_1071
JHU_ID_00072	JHU_ID_00072.3p		ugcccuucugccggcucuaaacccc	agugaggagggcagaggggcaca	agugaggagggcagaggggcacaggggaugcggagcugcagccugcccuucugccggcucuaaacccc	chr1:109626228-109626296	Neuron Dopaminergic	SRR5127234	23	23	0	0		Ago_1072				AMPD2
JHU_ID_00073	JHU_ID_00073.3p		gcuucuucagaaggagga	uugcaaggacucugaggagcca	uugcaaggacucugaggagccaggaagacggggcccaggucccagguggcuucuucagaaggagga	chr1:109654779-109654845	Breast adenocarcinoma	SRR960732	8	8	0	0
JHU_ID_00074	JHU_ID_00074.5p		ccccuccuagugcuuccggacc	ucccugaacacucggagguggcg	ccccuccuagugcuuccggaccuugcucccugaacacucggagguggcg	chr1:109656093-109656142	Retina	ERR973604	2	2	0	0						GSTM4
JHU_ID_00075	JHU_ID_00075.5p	JHU_ID_00075.3p	ucccagccccguggguuucagg	uggagcgcgcucauggggcuaggagu	uggagcgcgcucauggggcuaggaguaggaucuccucccaccucccagccccguggguuucagg	chr1:109667904-109667968	Islet Alpha Cell	SRR1028924	8	7	0	1		Ago_1075				GSTM4
JHU_ID_00076	JHU_ID_00076.3p		auucuuguggacauuuuggag	ccaaaauguccacacgaaucu	ccaaaauguccacacgaaucuucuccucuucugaagauucuuguggacauuuuggag	chr1:109713890-109713947	Brain, Prefrontal Cortex	ERR409879	2	2	0	0						GSTM5
JHU_ID_00077	JHU_ID_00077.3p		ugcccguucaaggccauggguuguu	gggcuugugguggggaggggugcggg	gggcuugugguggggaggggugcggggggcaguguggggaguuccagggugggcccaacugcccguucaaggccauggguuguu	chr1:109758068-109758152	Colon adenocarcinoma	SRR1917323	3	3	0	0						EPS8L3
JHU_ID_00078	JHU_ID_00078.3p		agguccucagcacccggc	uggcugcugaacucuggucucc	uggcugcugaacucuggucuccacagggcugaggcuucgcucggggccuggagguccucagcacccggc	chr1:109824048-109824117	Dendritic	SRR1708909	1	1	0	0
JHU_ID_00079	JHU_ID_00079.5p		ucaggaagacucaggcgcu	cgcccuacucaggaggccugaac	ucaggaagacucaggcgcugcaggcuccagccuuugggcugcaggcagcgcgcccuacucaggaggccugaac	chr1:109877511-109877584	Melanoma	SRR1913138	4	3	1	0
JHU_ID_00080	JHU_ID_00080.5p		cagugcggggaaugagga	cucaggccuugcaccaacgugga	cagugcggggaaugaggaccucaggccuugcaccaacgugga	chr1:109909015-109909057	Dendritic	SRR1708922	3	3	0	0
JHU_ID_00081	JHU_ID_00081.5p		cuugcacuuugacauucccaag	ugggagagagcaagggaggggag	cuugcacuuugacauucccaagagggaagggacuagugggagagagcaagggaggggag	chr1:109929901-109929960	Smooth Muscle Cell Bladder	SRR5127215	2	2	0	0						CSF1
JHU_ID_00082	JHU_ID_00082.3p		ccccuggcugucugugugug	agcuaguagcugggga	agcuaguagcuggggaagcuuuugucgacucgagacuuucuucccccuggcugucugugugug	chr1:110009301-110009364	Neuron iPSC	SRR1777166	2	2	0	0						AHCYL1
JHU_ID_00083	JHU_ID_00083.5p		aggaagcgaggcuggcagcu	caugaguccuugcucuagc	aggaagcgaggcuggcagcuccuggggucuggagcaugaguccuugcucuagc	chr1:110034963-110035016	B Cell Centrocyte	SRR060982	1	1	0	0						STRIP1
JHU_ID_00084	JHU_ID_00084.5p		uggcagugauggccggcugagg	gggguuggcuaacaccaga	uggcagugauggccggcugagggaggaggcagggguuggcuaacaccaga	chr1:110048496-110048546	Lung cancer	SRR1013983	26	26	0	0						STRIP1
JHU_ID_00085	JHU_ID_00085.5p		uugccuggcucugggccca	ggcccagcuagcuggcacaaga	uugccuggcucugggcccaucuccaguggaggccuggcccugaggaggcccagcuagcuggcacaaga	chr1:110066007-110066075	Smooth Muscle Cell Aorta	SRR5127217	1	1	0	0		Ago_1078				ALX3
JHU_ID_00086	JHU_ID_00086.3p		gaggcccaucucccaaggg	cugggagcaggccccug	cugggagcaggccccuggacuguccucagccaagacaggagaggcccaucucccaaggg	chr1:110089955-110090014	Skin	SRR1259230	18	18	0	0						LINC01397
JHU_ID_00087	JHU_ID_00087.5p	JHU_ID_00087.3p	gggaggcaggauaaggccuggac	accuagugcgucuucuccucccucc	gggaggcaggauaaggccuggaccccuuuucugaaaggcaaccuagugcgucuucuccucccucc	chr1:11012188-11012253	Colon adenocarcinoma	SRR1917329	88	86	1	1
JHU_ID_00088	JHU_ID_00088.5p		aggaugggggaaaaaaaa	guguuucccuccccuga	aggaugggggaaaaaaaaccugucaccucagccccuguguuucccuccccuga	chr1:110153880-110153933	Breast adenocarcinoma	SRR873383	18	18	0	0						SLC6A17
JHU_ID_00089	JHU_ID_00089.3p		uggcacagguaggggaacc	gucucuuaccuccuccauu	gucucuuaccuccuccauuuuucuggcacagguaggggaacc	chr1:110167182-110167224	Kidney	ERR038423	4	4	0	0						RP5-1028L10.1
JHU_ID_00090	JHU_ID_00090.3p		ccaggauggugggaggggagaggag	ccuagacccuuucaccaaggugacc	ccuagacccuuucaccaaggugaccagguaaacccccauccuuggcugugccuggccaggauggugggaggggagaggag	chr1:110197896-110197976	CD4+ T Cell	SRR1532971	2	2	0	0
JHU_ID_00092	JHU_ID_00092.3p	JHU_ID_00092.5p	acccagauagcaggagggcuga	caucccuccuggcucucuggcuu	caucccuccuggcucucuggcuucaucugggagagauagaacccagauagcaggagggcuga	chr1:110230702-110230764	Fibroblast Aorta Adventitia	SRR5127206	20	11	0	9						KCNC4
JHU_ID_00093	JHU_ID_00093.5p	JHU_ID_00093.3p	ucaccugggcccgcggggcaga	ugcagccucgggucaugcugacg	ucaccugggcccgcggggcagagaguucacgguuccugcagccucgggucaugcugacg	chr1:110338427-110338486	Lung Adenocarcinoma	SRR1013980	18	15	0	3		Ago_1081				RP5-1074L1.1
JHU_ID_00094	JHU_ID_00094.5p	JHU_ID_00094.3p	aaccggacgcucuucuugggc	uuaagaagggcguuugaucgc	aaccggacgcucuucuugggcaaccuagacaucacuguaacggagagugauuuaagaagggcguuugaucgc	chr1:110340522-110340594	Colon adenocarcinoma	SRR1917329	26	25	0	1						RBM15
JHU_ID_00095	JHU_ID_00095.5p	JHU_ID_00095.3p	cagaggagaugagacaagcaga	ugcuuguuucaucuccucuuug	ugcuuguuucaucuccucuuuguucuguuauggacacagaggagaugagacaagcaga	chr1:110365317-110365375	Red Blood Cell	SRR1664895	89	84	0	5		Ago_1082				SLC16A4
JHU_ID_00096	JHU_ID_00096.5p		agagggaggaggaugaauagu	aauuaaggccuuuuucuuuucu	agagggaggaggaugaauagugaagcaccaaaccucagaauuaaggccuuuuucuuuucu	chr1:110417708-110417768	B Cell_Pre-germinal center	SRR060983	11	11	0	0						LAMTOR5-AS1
JHU_ID_00097	JHU_ID_00097.3p		augcgucugcacuucggcu	cuggagugcaggugcguuc	cuggagugcaggugcguucccggcucgaccagcuugaaugcgucugcacuucggcu	chr1:1104729-1104785	Retina	ERR973617	13	13	0	0		Ago_23				C1orf159
JHU_ID_00098	JHU_ID_00098.3p	JHU_ID_00098.5p	cgcuuuucugagccucgcu	ugggcuggaucucagugg	ugggcuggaucucaguggugucugccccaggguggggcugggcaccgcuuuucugagccucgcu	chr1:110488431-110488495	Epithelium Keratinocyte (Neonatal)	SRR5127208	7	6	0	1						RP11-470L19.2
JHU_ID_00099	JHU_ID_00099.5p		ggggguggaggucagugg	gcugagccccacaaagccca	ggggguggaggucaguggucaguggggccaagggcugagccccacaaagccca	chr1:110490643-110490696	Breast adenocarcinoma	SRR029054	8	8	0	0
JHU_ID_00100	JHU_ID_00100.3p		uccggggaagggugucucugcc	ucagggagaugcugccuucccaggcug	ucagggagaugcugccuucccaggcugugaggagauccugaagcauccggggaagggugucucugcc	chr1:110516337-110516404	Macrophage	SRR1532975	2	2	0	0
JHU_ID_00101	JHU_ID_00101.5p		aaggaguaggacucccugggacc	accuaaagggagccuccucuaugugg	aaggaguaggacucccugggaccaaauuccacugaucuggaccuaaagggagccuccucuaugugg	chr1:110601273-110601339	Brain, Prefrontal Cortex	ERR409900	17	16	1	0						KCNA2
JHU_ID_00103	JHU_ID_00103.3p		cagggggaggcagugaca	ugagugaauacuggaguuugcu	ugagugaauacuggaguuugcugaggcucuuuggggagugagcagggggaggcagugaca	chr1:110630802-110630862	SkinDermis	SRR1259220	23	23	0	0
JHU_ID_00104	JHU_ID_00104.5p	JHU_ID_00104.3p	uuuugggacaaaguuucacucuu	gagugagaccuugucacaaacaaac	gagugagaccuugucacaaacaaacaaaaaaaaccauguuuuugggacaaaguuucacucuu	chr1:11100746-11100808	Brain, Prefrontal Cortex	ERR409900	197	190	0	7		Ago_234				RP4-635E18.6
JHU_ID_00105	JHU_ID_00105.5p		ucuggcccuggagcugcuggacc	ucuucaggcuuccuggccuauua	ucuggcccuggagcugcuggacccaucacagagucuucaggcuuccuggccuauua	chr1:111238873-111238929	Hepatocellular carcinoma (HepG2)	ERR738406	2	2	0	0						CHI3L2
JHU_ID_00106	JHU_ID_00106.3p		cccuggggagggagggggguccc	gaaagguucccggggcagggaa	gaaagguucccggggcagggaagggggucccuggggaggggagggggucccuggggagggagggggguccc	chr1:1115609-1115680	H9 Differentiated Mesenchymal	SRR1988295	1	1	0	0						C1orf159
JHU_ID_00107	JHU_ID_00107.3p	JHU_ID_00107.5p	ugauuucaugagguucugccugg	uaggcagagcccuuggaacaag	uaggcagagcccuuggaacaagacaaauggucugauuucaugagguucugccugg	chr1:111593707-111593762	Dendritic	SRR1708922	3	2	0	1						RAP1A
JHU_ID_00111	JHU_ID_00111.5p		auggggcuucuuccucugugcc	cacagugcaaccaagaggcucuccuc	auggggcuucuuccucugugcccuguccugggucacagugcaaccaagaggcucuccuc	chr1:111810355-111810414	Brain, Prefrontal Cortex	ERR409883	4	4	0	0						KCND3
JHU_ID_00113	JHU_ID_00113.5p		cggccagagcagagacuagug	uuugcucuacucuggccuggg	cggccagagcagagacuaguguucggcacagcugacuguugaauuugcucuacucuggccuggg	chr1:11194004-11194068	Brain, Frontal Cortex	SRR553572	2	2	0	0						ANGPTL7
JHU_ID_00114	JHU_ID_00114.3p		ucuggcugcaucugaacu	ccaggauucagccagggu	ccaggauucagccaggguccucuggcugcaucugaacu	chr1:111943205-111943243	Brain, Prefrontal Cortex	ERR409882	2	2	0	0
JHU_ID_00116	JHU_ID_00116.5p	JHU_ID_00116.3p	uccuauuuaaaaugucugaauug	aauuagcuuuuuaaauagaagc	uccuauuuaaaaugucugaauugggagcaucgacaagcucccaaauuagcuuuuuaaauagaagc	chr1:111992412-111992477	Breast adenocarcinoma	SRR873382	7	6	0	1						RP11-88H9.2
JHU_ID_00117	JHU_ID_00117.3p		uuggggcuguucucucucccacu	ugggagagggagucucugcucccugc	ugggagagggagucucugcucccugcucagaaugagggcuuggggcuguucucucucccacu	chr1:112241284-112241346	Platelet	SRR1592244	74	74	0	0						RP5-965F6.2
JHU_ID_00118	JHU_ID_00118.5p		uuucuuguggugcuuguc	uaagcuccacaaaggaaagu	uuucuuguggugcuugucacaguuguaauuaguuguauaguauauaucuuugcugugggucucuaagcuccacaaaggaaagu	chr1:112306780-112306863	Skin	SRR2174525	8	8	0	0						RP5-965F6.2
JHU_ID_00120	JHU_ID_00120.5p		ccauccccugagggggcgg	ucauccuccgagggu	ccauccccugagggggcggggccgucuccuccaccucccgguauuccccgaggaggcggcuccucauccuccgagggu	chr1:112396386-112396464	Nasopharyngeal epithelial cell	SRR1564522	1	1	0	0						CTTNBP2NL
JHU_ID_00121	JHU_ID_00121.3p		cucaggauuugggaauaguag	acuauucccaaauccugagcc	acuauucccaaauccugagccugucacauucaagaaauagugugacaggcucaggauuugggaauaguag	chr1:112451334-112451404	Lung	SRR1608273	2	2	0	0		Ago_1092				CTTNBP2NL
JHU_ID_00124	JHU_ID_00124.3p		aggcugccuguugggggc	cuccagagggggcccag	cuccagagggggcccaggcaucgcgggagcgcggguuagaggcugccuguugggggc	chr1:112675403-112675460	CD3+ T Cell Splenic	SRR5127200	2	2	0	0						MOV10
JHU_ID_00125	JHU_ID_00125.5p	JHU_ID_00125.3p	ugcccccagacugggcucagugu	cacugagccccucuguggccga	ugcccccagacugggcucagugucccucuguggcacugagccccucuguggccga	chr1:112688047-112688102	Colon adenocarcinoma	SRR1917336	487	469	0	18	TJU_CMC_MD2.ID00182.5p-miR	Ago_1097				MOV10
JHU_ID_00126	JHU_ID_00126.3p		cccugccuggccugacaccucccag	gggaaagcauucagguuugguaguugggu	gggaaagcauucagguuugguaguugggugccuggauaugaccccugccuggccugacaccucccag	chr1:112696370-112696437	CD3+ T Cell Splenic	SRR5127200	5	5	0	0						RP11-426L16.3
JHU_ID_00129	JHU_ID_00129.5p	JHU_ID_00129.3p	uucaggucuggggcugaaaccugu	aggcagucccaggcccgaaag	uucaggucuggggcugaaaccugucuuguuuccccaucagaggcagucccaggcccgaaag	chr1:112882060-112882121	Colon adenocarcinoma	SRR1917329	1270	1240	0	30		Ago_1101
JHU_ID_00130	JHU_ID_00130.5p		ucugugggacuugggguc	ccccaguguuucugggac	ucugugggacuuggggucugggauggaaugggugcagggaagcacccccugcccccugccccaguguuucugggac	chr1:11302005-11302081	Neural Stem Cell	SRR1988281	1	1	0	0
JHU_ID_00131	JHU_ID_00131.5p		uccuuugggccuucggga	caccacgggggccuggaua	uccuuugggccuucgggagaccccacuccaccacgggggccuggaua	chr1:1135119-1135166	SkinDermis	SRR1259220	22	22	0	0
JHU_ID_00132	JHU_ID_00132.5p/.3p		uccgagggccuggggagucgcgcg	gguggcuccgccccuggccc	gguggcuccgccccuggcccggggccuucccgcccagccuugguccaggcuccggguccgagggccuggggagucgcgcg	chr1:113759563-113759643	Heart	SRR553574	3	3	0	0
JHU_ID_00134	JHU_ID_00134.5p	JHU_ID_00134.3p	gacaaggucucgcucuguugacc	gugacagaucuagacccugacu	gugacagaucuagacccugacucuuaaaaaaaagagacaaggucucgcucuguugacc	chr1:113813523-113813581	Colon adenocarcinoma	SRR1917336	95	61	0	34		Ago_1104				RP5-1073O3.2
JHU_ID_00135	JHU_ID_00135.3p	JHU_ID_00135.5p	ucugucuucuuuccugggccu	guccggguagaagacauguca	guccggguagaagacaugucacucacucuaaacagugucugucuucuuuccugggccu	chr1:113872114-113872172	B cell lymphoblastoid	SRR1304313	26	23	0	3	TJU_CMC_MD2.ID00183.3p-miR	Ago_1105				AP4B1-AS1
JHU_ID_00139	JHU_ID_00139.5p		uuagaucucgcuggggccuc	ugccccaguuuuguucuuuuc	uuagaucucgcuggggccucaugcauuccagaaagccuuucuugauuagauugccccaguuuuguucuuuuc	chr1:114032627-114032699	Bladder	DRR013041	15	15	0	0						RP4-590F24.2
JHU_ID_00140	JHU_ID_00140.5p		uugauuguuaagcugaau	uuggcugaucacuugggg	uugauuguuaagcugaauguggucuugcugggaagcugggacuggguaaguuggcugaucacuugggg	chr1:114116682-114116750	Biliosphere	ERR842914	68	68	0	0						SYT6
JHU_ID_00141	JHU_ID_00141.5p		cggcagcagcuccggaccuggc	cagugugaaggagcugcugcccug	cggcagcagcuccggaccuggcauuucucaaucuagcagugugaaggagcugcugcccug	chr1:114155977-114156037	Retina	ERR973602	2	2	0	0
JHU_ID_00142	JHU_ID_00142.3p	JHU_ID_00142.5p	ucuccggugccucugagagac	uccucugagcaccuggagagga	uccucugagcaccuggagaggaggaagugcgucuucucuccggugccucugagagac	chr1:1144213-1144270	T cell leukemia	SRR1292461	7	6	0	1		Ago_26
JHU_ID_00143	JHU_ID_00143.3p		guggccgcggccuccucgggc	cugagggcggcgcggccgggc	cugagggcggcgcggccgggcccgacgacggggggguggccgcggccuccucgggc	chr1:114510857-114510913	Lung Adenocarcinoma	SRR1013979	17	17	0	0		Ago_1109				TRIM33
JHU_ID_00144	JHU_ID_00144.3p	JHU_ID_00144.5p	ggcggcggcggcgacgcggg	cucgcuagcucucggcugcc	cucgcuagcucucggcugccgcucuugcugcggcugcggcuggggcugggggcggcggcggcggcgacgcggg	chr1:114511120-114511193	Lung	SRR1608282	8	7	0	1						TRIM33
JHU_ID_00145	JHU_ID_00145.3p		uacagacagguaagagucgg	gggagacuagcuuggcc	gggagacuagcuuggccacaggagacaacguugagguacagacagguaagagucgg	chr1:114669971-114670027	SkinEpidermis	SRR1259212	12	12	0	0						DENND2C
JHU_ID_00146	JHU_ID_00146.3p		uugcgcggagccccagac	cugcggcuuccuugcaguc	cugcggcuuccuugcaguccuuccuugcgcggagccccagac	chr1:114780783-114780825	Dendritic	SRR1708919	2	2	0	0
JHU_ID_00148	JHU_ID_00148.3p		ucgccuggaaggccucagacucggc	cuggcaggcugcccaggaaagc	cuggcaggcugcccaggaaagcacaggucgccuggaaggccucagacucggc	chr1:115114509-115114561	Lung Adenocarcinoma	SRR1013968	10	10	0	0
JHU_ID_00149	JHU_ID_00149.5p		gaggaagguggggaggac	cuuuauccaccaguccucau	gaggaagguggggaggacgcucugggcuuuauccaccaguccucau	chr1:11554600-11554646	Plasma	SRR822445	26	26	0	0
JHU_ID_00151	JHU_ID_00151.5p		cucgcuccccccuccugacccu	ggucuugaccgggagcggggc	cucgcuccccccuccugacccuccgcaaugucagggucuugaccgggagcggggc	chr1:1157868-1157923	Dendritic	SRR1708911	3	3	0	0
JHU_ID_00152	JHU_ID_00152.5p	JHU_ID_00152.3p	ugcugcugucaggaaagggau	uccucuuaccugacacacaguagg	ugcugcugucaggaaagggaugcauauacauauccucuuaccugacacacaguagg	chr1:116078088-116078144	Colon adenocarcinoma	SRR1917329	13	10	0	3
JHU_ID_00153	JHU_ID_00153.5p		cgcccaggguggauugcagu	ugcaaccuccgccuccccggguuca	cgcccaggguggauugcagugguaugaucuuagcucacugcaaccuccgccuccccggguuca	chr1:11618590-11618653	Lung	SRR1608272	58	58	0	0		Ago_236
JHU_ID_00154	JHU_ID_00154.5p	JHU_ID_00154.3p	uuacugugaucuaauuucucuu	gagaaauuagaucacaguaauu	gagaaauuagaucacaguaauugguuggggccaauuacugugaucuaauuucucuu	chr1:116239623-116239679	Colon adenocarcinoma	SRR1917330	42	34	0	8
JHU_ID_00155	JHU_ID_00155.3p		uugccuugggcugcagcugc	agcuguggcucagggccacu	agcuguggcucagggccacucuagaaacacuugccuugggcugcagcugc	chr1:116433261-116433311	Blood	SRR837473	2	2	0	0						RP4-655J12.5
JHU_ID_00156	JHU_ID_00156.5p		cacucccacuccuucacuugacu	ccuuggaaacaaagugggaguaggc	cacucccacuccuucacuugacuauccuuggaaacaaagugggaguaggc	chr1:116452607-116452657	Blood	SRR2201572	18	18	0	0
JHU_ID_00157	JHU_ID_00157.3p		cugacucuuguuaccuccacccc	gguggggcggcaggagaggcc	gguggggcggcaggagaggccucaggaccuccgaggcugacucuuguuaccuccacccc	chr1:11648831-11648890	Brain, Prefrontal Cortex	ERR409900	16	16	0	0		Ago_237				FBXO2
JHU_ID_00158	JHU_ID_00158.3p		ucccacugagccucugcccuu	ggguggagguggggggagg	ggguggagguggggggagggccggcauuuccucccacugagccucugcccuu	chr1:116496484-116496536	Blood	SRR2061744	12	12	0	0		Ago_1124				RP5-1086K13.1
JHU_ID_00160	JHU_ID_00160.5p		uccuaccgcaccucccgcgcu	cguuuggggcgugcuguaggccc	uccuaccgcaccucccgcgcuuccccuuagcguuuggggcgugcuguaggccc	chr1:116571381-116571434	Blood	SRR2201548	2	2	0	0
JHU_ID_00161	JHU_ID_00161.5p		gccgaccuggagcuccgccgcugc	aguggggagccggggucucc	gccgaccuggagcuccgccgcugcgcccaggucgcguccccggggggacgggcggcgggcgaguggggagccggggucucc	chr1:11664394-11664475	CD3+ T Cell Splenic	SRR5127200	3	3	0	0						FBXO6
JHU_ID_00162	JHU_ID_00162.3p		caagcccccaacucugcuccccaga	ugggugagggggggggccaugca	ugggugagggggggggccaugcagagcacacccagguaugcaagcccccaacucugcuccccaga	chr1:11671864-11671929	Dendritic	SRR1708918	164	164	0	0		Ago_239				FBXO6
JHU_ID_00163	JHU_ID_00163.3p		uucccccagucaacaagaaca	cgcuugcccucugagggacaagg	cgcuugcccucugagggacaaggggucucauuccuucccccagucaacaagaaca	chr1:1168518-1168573	Colon adenocarcinoma	SRR1917329	3	3	0	0
JHU_ID_00164	JHU_ID_00164.3p		gccagggcuggcaacuggaaccu	guuccaggcuccccuggcug	guuccaggcuccccuggcugaguucuuauuucagccacagccagggcuggcaacuggaaccu	chr1:11693537-11693599	Fibroblast Lung	SRR1988286	4	4	0	0						DRAXIN
JHU_ID_00165	JHU_ID_00165.5p	JHU_ID_00165.3p	acuccugggcuuguaauggga	ucugacaugcccuggagacau	acuccugggcuuguaaugggaagggcugccaugaaaaccucugacaugcccuggagacau	chr1:116939551-116939611	Neuron Cortical	SRR5127209	4	2	0	2						PTGFRN
JHU_ID_00166	JHU_ID_00166.5p		cgccugaucucgucugaucuuggaa	cuggaugggagaauuucugguggg	cgccugaucucgucugaucuuggaagcuaagcagggucaggccugguuaguaucuggaugggagaauuucugguggg	chr1:116962370-116962447	Skin	SRR2174521	3	3	0	0						RNA5SP55
JHU_ID_00167	JHU_ID_00167.5p		acaccuggagagcucgggcca	gccugagcucauccaacaccgc	acaccuggagagcucgggccaggcagggccacaccugugagccugagcucauccaacaccgc	chr1:1169987-1170049	Kidney	ERR038422	1	1	0	0						RP11-465B22.8
JHU_ID_00168	JHU_ID_00168.3p	JHU_ID_00168.5p	cccggaguagcccuggaccaga	ggcccagggucugcuccucc	ggcccagggucugcuccucccagccgagcacagucagcagcccggaguagcccuggaccaga	chr1:11701621-11701683	Neuron Cortical	SRR5127209	21	20	0	1						DRAXIN
JHU_ID_00169	JHU_ID_00169.5p		gcagaggaggcucaguag	ggugggcagcuucucagcua	gcagaggaggcucaguagagaggugggcagcuucucagcua	chr1:11704061-11704102	Lung	SRR372614	45	45	0	0						DRAXIN
JHU_ID_00170	JHU_ID_00170.3p		ugcccuccccuuccuuccccugc	ggaggcaaggggggucagaggcgcg	ggaggcaaggggggucagaggcgcgaagggcccgugcccuccccuuccuuccccugc	chr1:11719516-11719573	Blood	SRR2201549	1	1	0	0						DRAXIN
JHU_ID_00171	JHU_ID_00171.3p		auggcuggagcaagggaaug	uacuugcuucagcaaacc	uacuugcuucagcaaaccuuccugaagcuuccagucaaaggugguggggagacauggcuggagcaagggaaug	chr1:11737216-11737289	Brain, Prefrontal Cortex	ERR409883	4	4	0	0						AGTRAP
JHU_ID_00172	JHU_ID_00172.3p		cuggcucugcuaccccgucccau	aaggcggggagccgcagcacaggg	aaggcggggagccgcagcacagggcaagacauagccuggcucugcuaccccgucccau	chr1:11747572-11747630	Skeletal Muscle Cell	SRR5127202	1	1	0	0						AGTRAP
JHU_ID_00173	JHU_ID_00173.5p	JHU_ID_00173.3p	ucaucuuugacccugccuccu	gaugcaauugcaaagaugagu	ucaucuuugacccugccuccugucuuuauuucaaaaaggaugcaauugcaaagaugagu	chr1:117544007-117544066	Colon adenocarcinoma	SRR1917323	7	5	0	2
JHU_ID_00174	JHU_ID_00174.5p	JHU_ID_00174.3p	ucuggccccggggaccaccugug	cguggucuucggggagagagcgc	cguggucuucggggagagagcgccggcggcucucuggccccggggaccaccugug	chr1:117605411-117605466	Islet Alpha Cell	SRR1028924	75	69	0	6	TJU_CMC_MD2.ID00186.5p-miR					AL157902.3
JHU_ID_00175	JHU_ID_00175.3p	JHU_ID_00175.5p	gggcaacacagcgagaucgucuca	gaggcaggagaauugcuugaaccc	gaggcaggagaauugcuugaacccaggggguggagguugcagugagccaagaucgcaccacugcaugccugggcaacacagcgagaucgucuca	chr1:11781020-11781114	Brain, Prefrontal Cortex	ERR409888	3	2	0	1
JHU_ID_00176	JHU_ID_00176.3p	JHU_ID_00176.5p	ucuuguagcagguauuuucccu	gggaaauaucugcuaccagauu	gggaaauaucugcuaccagauuagagauuaaggaaaucuuguagcagguauuuucccu	chr1:117854810-117854868	Smooth Muscle Cell Prostate	SRR5127222	1043	1039	0	4		Ago_1138				SNORA40
JHU_ID_00177	JHU_ID_00177.5p		gccuggacagaguagcugg	agagcgcacuccagccc	gccuggacagaguagcugggucccaggccugccccuguggacgagggaccagggaccaagagcgcacuccagccc	chr1:11787922-11787997	Lung	SRR372624	1	1	0	0						MTHFR
JHU_ID_00178	JHU_ID_00178.3p		gccagcucaccgucucucccag	guugggggccgugagagggacuc	guugggggccgugagagggacucagggugccaaaccugauggucgccccagccagcucaccgucucucccag	chr1:11794089-11794161	Neuron iPSC	SRR1777163	5	5	0	0						MTHFR
JHU_ID_00179	JHU_ID_00179.5p		ucugucaggagugugcccug	gggcaccccucugccagggg	ucugucaggagugugcccugaccucugggcaccccucugccagggg	chr1:11794535-11794581	Lung	SRR1608275	4	4	0	0						MTHFR
JHU_ID_00181	JHU_ID_00181.3p		cccuggccucugaccuccagg	ugggccggagcacagggca	ugggccggagcacagggcagguuggagggguggggaccgagguccugcgcucccuccacacgagcccuggccucugaccuccagg	chr1:1180647-1180732	Lung cancer	SRR1013984	3	3	0	0						TTLL10
JHU_ID_00183	JHU_ID_00183.3p		gcuccuggaucugggguagagc	ucacuccaguccugguccug	ucacuccaguccugguccugcccuagagaaacccagcuccuggaucugggguagagc	chr1:118957327-118957384	Skin	SRR1259236	3	3	0	0						TBX15
JHU_ID_00187	JHU_ID_00187.5p	JHU_ID_00187.3p	accaauuuuuugaggccuug	gggcuuauuuuaaguguuu	accaauuuuuugaggccuugcguuucuuagcagggcuuauuuuaaguguuu	chr1:11908235-11908286	Biliosphere	ERR842914	289	237	43	9		Ago_243
JHU_ID_00188	JHU_ID_00188.3p		ggagcagcgggggagcucgccccga	ggggcagaagagcccuugggacug	ggggcagaagagcccuugggacugccuucuucgauucuacacggagaagccggcgggagcagcgggggagcucgccccga	chr1:11908823-11908903	Epithelium Keratinocyte (Adult)	SRR5127203	1	1	0	0
JHU_ID_00189	JHU_ID_00189.3p	JHU_ID_00189.5p	uucguauuuacucugaaacaag	guuuuaaaaguagaugcccuuagcc	guuuuaaaaguagaugcccuuagccauuacgacgguucguauuuacucugaaacaag	chr1:11909740-11909797	Dendritic	SRR1708922	4	3	0	1
JHU_ID_00190	JHU_ID_00190.3p		ggcgcgcggcgggcggcgggc	ccgccgccuccucugccugcuug	ccgccgccuccucugccugcuuggccuccugcugcugcuucugugguuugggggguccggcgcgcggcgggcggcgggc	chr1:11926102-11926181	Lung	SRR1608277	2	2	0	0						KIAA2013
JHU_ID_00191	JHU_ID_00191.5p/.3p		gagggcggugagaggagagagagg	ccugccgucucccucccuucu	ccugccgucucccucccuucucugggggguucacuccgaccagaaagagggcggugagaggagagagagg	chr1:11934458-11934528	Platelet	SRR1592245	1	1	0	0
JHU_ID_00193	JHU_ID_00193.3p		uagacuggguugacucuggaga	gccagaaugugggcccaggcuaug	gccagaaugugggcccaggcuauguugccaacauagacuggguugacucuggaga	chr1:119571597-119571652	Dendritic	SRR1708915	4	4	0	0
JHU_ID_00194	JHU_ID_00194.5p		caugugucuauuuugugucaguca	acauggcaguguagggguggg	caugugucuauuuugugucagucacuggggacagagagaugacauggugaguuacuguccucaggacauggcaguguagggguggg	chr1:119583362-119583448	Immort. Mammary Epi	SRR433867	2	2	0	0
JHU_ID_00195	JHU_ID_00195.3p		uagacuggguugacucuggaga	gccagaaugugggcccaggccaug	gccagaaugugggcccaggccauguuuccaauauagacuggguugacucuggaga	chr1:119608770-119608825	Dendritic	SRR1708915	2	2	0	0
JHU_ID_00196	JHU_ID_00196.3p		acugggcaagaaagagguaa	aucucuuucagaugccccucag	aucucuuucagaugccccucagggauucuccuggguucuagagaauccccugcgugcgacugggcaagaaagagguaa	chr1:119610428-119610506	Melanoma	SRR1913139	12	12	0	0
JHU_ID_00197	JHU_ID_00197.3p		cacugccuggagccacucgcccc	ugcgguggcuggggaaggaggg	ugcgguggcuggggaaggagggguguugcauuuuucaccuuaccccacugccuggagccacucgcccc	chr1:119611330-119611398	Dendritic	SRR1708913	3	3	0	0
JHU_ID_00199	JHU_ID_00199.5p		ucuggagguggaaggaaaggau	acuuucccuccuuuuccaggac	ucuggagguggaaggaaaggauugggagccagcaauacuuucccuccuuuuccaggac	chr1:119724730-119724788	Melanoma	SRR1913139	4	4	0	0						PHGDH
JHU_ID_00201	JHU_ID_00201.3p		uccggcccagggaucuuucug	gccucccaaagugcugggau	gccucccaaagugcugggauuacaggcaucagccaccacuuccggcccagggaucuuucug	chr1:119999585-119999646	Hepatocellular carcinoma (HepG2)	ERR738413	3	3	0	0						NOTCH2
JHU_ID_00202	JHU_ID_00202.3p		cuggacacagccugaaacagcagc	ugcugccagguuggaggaauu	ugcugccagguuggaggaauuggugaucgucacaccacauuccugggucuggacacagccugaaacagcagc	chr1:120068554-120068626	Lung Adenocarcinoma	SRR1013979	2	2	0	0						NOTCH2
JHU_ID_00203	JHU_ID_00203.5p		uuucccagcgccaggacag	gccccagcugcugggaucug	uuucccagcgccaggacagguggggagguccuugagggacaggugguccccggcugccccagcugcugggaucug	chr1:1200775-1200850	Lung	SRR1608282	1	1	0	0
JHU_ID_00204	JHU_ID_00204.5p		cuggaggaaggugggggu	ccucaaaggcuuccaugaggca	cuggaggaaggugggggugucugugugauacccucaaaggcuuccaugaggca	chr1:12011898-12011951	Breast adenocarcinoma	SRR029054	16	16	0	0						MFN2
JHU_ID_00205	JHU_ID_00205.5p		accgguaguggaaagcucuugcgcu	cgcaagcagcuggaucuccgguaa	accgguaguggaaagcucuugcgcuguuuccggccaccucagcgggaagcggagacgcaagcagcuggaucuccgguaa	chr1:120176476-120176555	T cell leukemia	SRR1532969	2	2	0	0						SEC22B
JHU_ID_00207	JHU_ID_00207.3p		guuguuaugguaacuccccacg	gggggaagggggcgauacccaaccc	gggggaagggggcgauacccaacccccucuauuacuaggggguuguuaugguaacuccccacg	chr1:120394021-120394084	Embryonic kidney	SRR515902	1	1	0	0						U1
JHU_ID_00210	JHU_ID_00210.3p	JHU_ID_00210.5p	cuggccugucuccugcccagg	uggggaggagggggccucagcc	uggggaggagggggccucagcccagcugcuggggggcuggccugucuccugcccagg	chr1:1205491-1205548	T cell leukemia	SRR1304307	571	570	0	1	TJU_CMC_MD2.ID00006.3p-miR	Ago_30				TNFRSF18
JHU_ID_00211	JHU_ID_00211.3p		aggcuuugcgucugggcgg	gcagacgcgaagccgcu	gcagacgcgaagccgcuggcgccaucuugaaaucugauccuccauccccgaggcuuugcgucugggcgg	chr1:120558516-120558585	Lung	SRR372624	1	1	0	0
JHU_ID_00213	JHU_ID_00213.3p		cuggacacagccugaaacagcagc	ugcugccagguuggaggaauu	ugcugccagguuggaggaauuggugaucgucacaccacauuccugggucuggacacagccugaaacagcagc	chr1:120724958-120725030	Lung Adenocarcinoma	SRR1013979	2	2	0	0						AC253572.1
JHU_ID_00215	JHU_ID_00215.3p	JHU_ID_00215.5p	caagagccuggaacugcacca	gugcaguuccaggcucuuggu	gugcaguuccaggcucuuggugucccaaacaaagacaccaagagccuggaacugcacca	chr1:120842640-120842699	Islet Beta Cell	SRR873401	197	193	0	4		Ago_1167
JHU_ID_00216	JHU_ID_00216.3p	JHU_ID_00216.5p	cucccccuaagacugugguacu	ugccauuguccuuuggggagg	ugccauuguccuuuggggaggugcgcagagaccccgcgucuggucucccccuaagacugugguacu	chr1:120851345-120851411	Lung Adenocarcinoma	SRR1013980	279	274	1	4
JHU_ID_00218	JHU_ID_00218.5p	JHU_ID_00218.3p	guuuuuccagagcaaggcuua	guuuuacuguggaugugcuga	guuuuuccagagcaaggcuuagcaguuuuacuguggaugugcuga	chr1:120942640-120942685	Lung	SRR1608276	3	2	0	1						RNVU1-4
JHU_ID_00219	JHU_ID_00219.5p	JHU_ID_00219.3p	augucucuguggcgcaaucgg	gcuagcguuuagugacagcu	gcuagcguuuagugacagcuuacccucuuuuagaacgaaauuaggagcucagccaugucucuguggcgcaaucgg	chr1:121048486-121048561	Testes	SRR333682	2092	2059	1	32		Ago_1168
JHU_ID_00220	JHU_ID_00220.3p		ugcuuacaccacaacuggggaa	ccccaauugugguguaagcauu	ccccaauugugguguaagcauuuuuagaggaugcuuacaccacaacuggggaa	chr1:121073163-121073216	BladderEpithelium	DRR013037	2	2	0	0
JHU_ID_00222	JHU_ID_00222.5p		cccgcggcuggaggaaggggccac	ggcggcgggguucaggcgagcgggaa	cccgcggcuggaggaaggggccacgcugaggaaacaagacagggagcagaggcggcgggguucaggcgagcgggaa	chr1:121185842-121185918	Fibroblast Dermal (adult)	SRR5127205	1	1	0	0						SRGAP2C
JHU_ID_00223	JHU_ID_00223.3p		uccugacccuguugcugacucug	gaggcaggagggcagggcggugggaag	gaggcaggagggcagggcggugggaagugauacucauggucacuuccugacccuguugcugacucug	chr1:121362652-121362719	Stromal cell Prostate	SRR5127226	1	1	0	0						SRGAP2-AS1
JHU_ID_00224	JHU_ID_00224.5p		augauguaugcuuugaca	ugcaagguaauacacuucag	augauguaugcuuugacagugguccgcuaccagggugcaagguaauacacuucag	chr1:121384777-121384832	Biliosphere	ERR842903	32	32	0	0						SRGAP2-AS1
JHU_ID_00225	JHU_ID_00225.3p		ugcagauuguggaggcaacaggagg	ucuuggccucugcagccagu	ucuuggccucugcagccagucuauccccaucaguguggguugucugcagauuguggaggcaacaggagg	chr1:121385059-121385128	Testes	SRR553576	16	16	0	0						SRGAP2-AS1
JHU_ID_00226	JHU_ID_00226.3p		uagguuaugaagauacuuuuuu	aaaaguaucaucaugaccuaua	aaaaguaucaucaugaccuauagguagagcuacucauagguuaugaagauacuuuuuu	chr1:12157122-12157180	Myotube Skeletal Muscle	SRR1055963	2	2	0	0
JHU_ID_00227	JHU_ID_00227.5p		augggguguguuaggacgg	guccuggcucucccagug	augggguguguuaggacggcugguggggguccugcucuguggcgugugggggcccaggcuguguccuggcucucccagug	chr1:1216491-1216571	CD8+ T Cell	SRR1853809	1	1	0	0
JHU_ID_00230	JHU_ID_00230.5p		accuggcccguggcucugcuggg	cagcagggcugggccaggagg	accuggcccguggcucugcugggucucugcuucugcccagcagggcugggccaggagg	chr1:12198585-12198643	Red Blood Cell	SRR1664897	1	1	0	0		Ago_253
JHU_ID_00231	JHU_ID_00231.5p	JHU_ID_00231.3p	uggauggcagugggaaggaagagg	cuaccacccccugcccauccagc	uggauggcagugggaaggaagaggggaagaaagagcuggcuggugggcugacugcucuccccuaccacccccugcccauccagc	chr1:12201884-12201968	BladderEpithelium	DRR013036	21	19	0	2		Ago_254
JHU_ID_00232	JHU_ID_00232.5p		ccgggcggggccagggucggg	cgcuagggcuccgccuggac	ccgggcggggccagggucgggaacugcagggccggcgcggacccgcgggccgccgcuagggcuccgccuggac	chr1:12230143-12230216	Lung	SRR1216774	1	1	0	0						VPS13D
JHU_ID_00233	JHU_ID_00233.3p		accggaccugggcguccc	agcggccagaccgggaa	agcggccagaccgggaauaggaaggacuggcaaccggaccugggcguccc	chr1:12231041-12231091	Nasopharyngeal carcinoma	SRR1564521	1	1	0	0						VPS13D
JHU_ID_00234	JHU_ID_00234.5p		cuggggugcaguuucucugucu	agagagaaaucacaucccaguc	cuggggugcaguuucucugucuaguuuagaaauauucuaaagagagaaaucacaucccaguc	chr1:12319213-12319275	Neuron iPSC	SRR1777169	2	2	0	0						VPS13D
JHU_ID_00235	JHU_ID_00235.5p		ccccaggaggagagcaccc	cugcccucuuccuggggac	ccccaggaggagagcacccccuucugcccucuuccuggggac	chr1:1235576-1235618	Neural Stem Cell	SRR1988281	2	2	0	0
JHU_ID_00236	JHU_ID_00236.5p		aagggagguggaggcggg	agccucggccucuguccu	aagggagguggaggcgggaggggcaggaaggaggaucuggaaggccccaggcgcuccccacccauccagccucggccucuguccu	chr1:1237328-1237413	Platelet	SRR1592244	1	1	0	0
JHU_ID_00237	JHU_ID_00237.3p		caguagauauagugacagu	ugucaaauaucuccucuguu	ugucaaauaucuccucuguuguccaaacauggcacaguagauauagugacagu	chr1:12466884-12466937	Red Blood Cell	SRR5127232	2	2	0	0		Ago_256				VPS13D
JHU_ID_00238	JHU_ID_00238.3p		ugaggucaggcgcaguagcuc	gccacugcacccgaccucacu	gccacugcacccgaccucacuugcaguuuauuuguguuuuaaaacuuaaagagugaggucaggcgcaguagcuc	chr1:12522041-12522115	Neuroblastoma	SRR1304311	33	33	0	0
JHU_ID_00239	JHU_ID_00239.3p		uucaaagcagcaaguacccaccca	ggguggguacuugcgacuuugaauu	ggguggguacuugcgacuuugaauuuccagcucccccaacuggaagggaaauucaaagcagcaaguacccaccca	chr1:12540007-12540082	BladderEpithelium	DRR013038	1	1	0	0	TJU_CMC_MD2.ID00056.3p-miR	Ago_257
JHU_ID_00240	JHU_ID_00240.3p	JHU_ID_00240.5p	uucccccaaacucugauucacc	uggaucagggcucugagggugggc	uggaucagggcucugagggugggcuaaaccaguagaggcuucccccaaacucugauucacc	chr1:12541917-12541978	Cervical cancer	SRR1304304	102	101	0	1		Ago_258
JHU_ID_00241	JHU_ID_00241.5p	JHU_ID_00241.3p	ugagugaguggaaacugggagc	ucccucccucacucacucaac	ugagugaguggaaacugggagcuguggauccccggcaggcucccucccucacucacucaac	chr1:12587932-12587993	Bladder	DRR013041	133	125	0	8	TJU_CMC_MD2.ID00057.3p-miR	Ago_259
JHU_ID_00242	JHU_ID_00242.3p		ugugaugauguuagcugagc	ucgguauccuccuggg	ucgguauccuccuggggcuggugucuugugaugauguuagcugagc	chr1:12588635-12588681	Cervical cancer	SRR1304304	346	346	0	0
JHU_ID_00243	JHU_ID_00243.5p	JHU_ID_00243.3p	ucucagcucugagcgcuggcugcc	cgguccagggcugcucuggga	ucucagcucugagcgcuggcugccaaguuagugcgguccagggcugcucuggga	chr1:12596550-12596604	Smooth Muscle Cell, Coronary	SRR5127211	6	5	0	1
JHU_ID_00244	JHU_ID_00244.3p		ggccugggcugggaguuggguga	ucccucuccugauggcucuggucac	ucccucuccugauggcucuggucaccgcgugagucagccuggccugggcugggaguuggguga	chr1:12616280-12616343	BladderEpithelium	DRR013036	3	3	0	0
JHU_ID_00245	JHU_ID_00245.3p		aggcugggaguugccgcucg	uccggcucccucccucccucu	uccggcucccucccucccucucuguuccagcagaggcugggaguugccgcucg	chr1:12618063-12618116	Neuron iPSC	SRR1777164	2	2	0	0		Ago_262
JHU_ID_00246	JHU_ID_00246.3p		acgggaagagagaagccg	guuucuccucgucu	guuucuccucgucuuuguaccugagcuguacgucgugucaaugaaggugguggcgggacagacgggaagagagaagccg	chr1:1268168-1268247	Bladder	DRR013044	2	2	0	0						UBE2J2
JHU_ID_00247	JHU_ID_00247.3p		gcagggauugucuggccag	ggcugccucugaac	ggcugccucugaacagcagggauugucuggccag	chr1:1275637-1275671	Brain, Frontal Cortex	SRR553572	2	2	0	0						RP5-902P8.10
JHU_ID_00248	JHU_ID_00248.5p		cuggacccuguggggcugggc	ccagccaagcccagggacccagca	cuggacccuguggggcugggcucccccagccaagcccagggacccagca	chr1:1282355-1282404	Biliosphere	ERR842903	1	1	0	0						SCNN1D
JHU_ID_00249	JHU_ID_00249.3p		ucugggccucccacccucagg	uggaggguggguggaguuccagccu	uggaggguggguggaguuccagccuugccccagggcucuggacggagucugggccucccacccucagg	chr1:1294840-1294908	Brain, Prefrontal Cortex	SRR1759212	2	2	0	0						ACAP3
JHU_ID_00250	JHU_ID_00250.3p	JHU_ID_00250.5p	aucccuaccucugcucuccagg	ccggggguggggguugggccgg	ccggggguggggguugggccggagcugggggccuugccucccccagacucaucccuaccucugcucuccagg	chr1:1296279-1296351	BladderEpithelium	DRR013037	154	152	0	2	TJU_CMC_MD2.ID00007.3p-miR	Ago_38
JHU_ID_00251	JHU_ID_00251.5p		auguugggggcuggaccgggugugc	acgcccaguccagcuucuuccagca	auguugggggcuggaccgggugugcuugggccucaccugugcugcccccgcagaugcuguccuucaugcacgcccaguccagcuucuuccagca	chr1:1300027-1300121	BrainPrefrontalCortex	SRR1759213	6	6	0	0
JHU_ID_00252	JHU_ID_00252.3p		cacuguaacucugagaugaag	ccaucucaaaaacuguaaaagugcu	ccaucucaaaaacuguaaaagugcuaccaugcuauucuagagcacuguaacucugagaugaag	chr1:13028114-13028177	Heart	ERR038427	12	12	0	0						PRAMEF6
JHU_ID_00253	JHU_ID_00253.5p/.3p		ucagagggcguggcuggguga	ucccaucugcuccuccagga	ucagagggcguggcugggugaccugggcccggauuugccaucucagcacggguucccaucugcuccuccagga	chr1:1302973-1303046	Retina	ERR973604	3	3	0	0
JHU_ID_00255	JHU_ID_00255.5p		uccgcuccccgacucuggccgc	ggccggggccgggggggagg	uccgcuccccgacucuggccgccguggcgcggugccaccgcgcaggcgcaagagcggccggggccgggggggagg	chr1:1308482-1308557	Neuron iPSC	SRR1777166	22	22	0	0
JHU_ID_00256	JHU_ID_00256.3p		aucccacuucuaacacca	gaggcaucaggaagagaucg	gaggcaucaggaagagaucggagguccccuuugaaucccacuucuaacacca	chr1:13276727-13276779	Macrophage	SRR1532975	382	382	0	0
JHU_ID_00257	JHU_ID_00257.3p		cacuguaacucugagaugaag	ccaucucaaaaacuguaaaagugcu	ccaucucaaaaacuguaaaagugcuaccaugcuauucuagagcacuguaacucugagaugaag	chr1:13346501-13346564	Heart	ERR038427	12	12	0	0						PRAMEF14
JHU_ID_00258	JHU_ID_00258.5p		uccugguggucggugcuggccgugg	cccgcccccaccccaccugggcu	uccugguggucggugcuggccguggugcuggaccccgcccccaccccaccugggcu	chr1:1335028-1335084	Colon adenocarcinoma	SRR1917324	2	2	0	0						TAS1R3
JHU_ID_00259	JHU_ID_00259.3p	JHU_ID_00259.5p	ucaccuacccucccccgccaga	gggcgggggggaggggaac	gggcgggggggaggggaacgccggaggccccuccgcggcccucaccuacccucccccgccaga	chr1:1338182-1338245	BrainPrefrontalCortex	ERR409883	105	104	0	1	TJU_CMC_MD2.ID00008.3p-miR	Ago_44				DVL1
JHU_ID_00260	JHU_ID_00260.3p		cccuagcuguccuccuaccugg	augaaccgagggcagcugggcac	augaaccgagggcagcugggcacgggggcuuucccaaggaggccucacccuagcuguccuccuaccugg	chr1:1343124-1343193	H7 ESC	SRR1636959	1	1	0	0
JHU_ID_00262	JHU_ID_00262.3p		uggagccccaggcagaccccacc	agggcucugccugggaccugg	agggcucugccugggaccuggguagcugaucccuggagccccaggcagaccccacc	chr1:1345363-1345419	Smooth Muscle Cell, Coronary	SRR5127211	1	1	0	0
JHU_ID_00263	JHU_ID_00263.3p		accgccaggcuccugcuccc	gacucagguuacugguggcug	gacucagguuacugguggcugggccgggccaggccaggccucaagcagaccgccaggcuccugcuccc	chr1:1348106-1348174	Nasopharyngeal carcinoma	SRR1564521	2	2	0	0
JHU_ID_00265	JHU_ID_00265.5p	JHU_ID_00265.3p	agggacgcagcacggagggcgcg	cccucccgccugcgccccuc	agggacgcagcacggagggcgcgcucagccccgccgcccucccgccugcgccccuc	chr1:1349312-1349368	Biliosphere	ERR842903	303	268	0	35	TJU_CMC_MD2.ID00010.3p-miR	Ago_47
JHU_ID_00266	JHU_ID_00266.5p/.3p		uggcugugggcccgugggcgcc	cgcgcgcgggcccgcgcuccauu	cgcgcgcgggcccgcgcuccauuaugauccggcgcaugcgacgcgcgccgcuggcugugggcccgugggcgcc	chr1:1349534-1349607	CD4+ T Cell	SRR1532972	52	49	3	0	TJU_CMC_MD2.ID00012.3p-miR
JHU_ID_00267	JHU_ID_00267.5p/.3p		cggccucaagggacgccucgg	caggacuaaaucccucccgccgcc	cggccucaagggacgccucggaagucuccccugcccugcggagaaccccaggacuaaaucccucccgccgcc	chr1:1349801-1349873	Embryonic kidney	SRR515902	4	4	0	0
JHU_ID_00268	JHU_ID_00268.3p		cgaccccgcguuccccgcaga	cguggcccgggucggg	cguggcccgggucggggcgcaggucuugcugguaccugacgccgccccgaccccgcguuccccgcaga	chr1:1354508-1354576	Bladderepithelium	DRR013035	3	3	0	0	TJU_CMC_MD2.ID00013.3p-miR					MXRA8
JHU_ID_00269	JHU_ID_00269.3p		gugggggagaggcugcggcu	cccagccuucagccuucacac	cccagccuucagccuucacacacggugggggagaggcugcggcu	chr1:1372518-1372562	Plasma Cell	SRR060984	2	2	0	0
JHU_ID_00271	JHU_ID_00271.5p		uuugguuggggccgggguggaauga	guuuggcucuguccccacccaaauc	uuugguuggggccgggguggaaugauaugguuuggcucuguccccacccaaauc	chr1:13852008-13852062	SkinEpidermis	SRR1259212	14	14	0	0
JHU_ID_00272	JHU_ID_00272.3p		guuggggagcggauguggggccgc	ugcccaguugugcuccugaacuc	ugcccaguugugcuccugaacucgcggugguggugcguguuggggagcggauguggggccgc	chr1:1407368-1407430	Lung	SRR372618	2	2	0	0
JHU_ID_00273	JHU_ID_00273.3p		gcgggcgggggaggccggg	cuccccuccccucucuucc	cuccccuccccucucuuccccuccccugcccuccguggcgggggcggggcugcgggcgggggaggccggg	chr1:1427921-1427991	Testes	SRR333678	1	1	0	0
JHU_ID_00274	JHU_ID_00274.3p		gaaacugcccaggcucagguuuu	aaccugagccugggcaguuuccc	aaccugagccugggcaguuucccuggcaaaaacccugccagggaaacugcccaggcucagguuuu	chr1:14294631-14294696	Skin	SRR2174529	16	16	0	0
JHU_ID_00275	JHU_ID_00275.5p		gauccauggaaggggcca	gcccguucuguccu	gauccauggaaggggccaggcaagaacccgggggaagaacccaggggccucaacgcagggcccguucuguccu	chr1:1431147-1431220	Lung	SRR1608271	1	1	0	0						RP4-758J18.10
JHU_ID_00276	JHU_ID_00276.5p/.3p		acaggucuugggggccucgggggu	uucccaggagcccaggccugccc	acaggucuugggggccucgggggucacuuuucacuucccaggagcccaggccugccc	chr1:1432823-1432880	Brain, Prefrontal Cortex	ERR409888	5	5	0	0						RP4-758J18.10
JHU_ID_00277	JHU_ID_00277.3p		ggcaggcuggcuccgggaagu	uuccuggaacucucuccaccugccug	uuccuggaacucucuccaccugccugcagacagaccggcagggcaggcuggcuccgggaagu	chr1:1433362-1433424	Skin	SRR2174525	5	5	0	0						RP4-758J18.10
JHU_ID_00278	JHU_ID_00278.3p		ucuuggguuugagcgauuc	cuugcucuguugcccaagcug	cuugcucuguugcccaagcuggagugcaguggugcaaucucggcucacugcaaccucugcuucuuggguuugagcgauuc	chr1:14334274-14334354	Brain, Prefrontal Cortex	ERR409888	2	2	0	0
JHU_ID_00279	JHU_ID_00279.5p		uacuguagacccuggcuuggcaga	ugccucauaggaucccugcaaaaau	uacuguagacccuggcuuggcagaauuuccugacucuucaucauuagaaguucugccucauaggaucccugcaaaaau	chr1:143367927-143368005	Testes	SRR333688	10	10	0	0
JHU_ID_00282	JHU_ID_00282.5p	JHU_ID_00282.3p	aggcgaaaccacggucuggacgu	cgccagccccugggguucucuug	aggcgaaaccacggucuggacguguuuuuuuggugccaccgccagccccugggguucucuug	chr1:1435246-1435308	Colon adenocarcinoma	SRR1917336	110	109	0	1
JHU_ID_00283	JHU_ID_00283.5p		gcagcuguuuaccuagaag	ucguguuuguuguca	gcagcuguuuaccuagaagugcauuuucacuucguguuuguuguca	chr1:14368357-14368403	Melanoma	SRR1913139	7	7	0	0
JHU_ID_00284	JHU_ID_00284.5p/.3p		uugcaggcacaguugaugaug	ucaucaacugugugugacaug	ucaucaacugugugugacauguagcacuuuggguugcaggcacaguugaugaug	chr1:143694266-143694320	Embryonic kidney	SRR515902	6	6	0	0
JHU_ID_00285	JHU_ID_00285.5p		uagauaaaggaagagcugugc	acgauucuuauuucucccgggg	uagauaaaggaagagcugugcggccuucgcgcuagcuagcuuguguaaaggucgacgauucuuauuucucccgggg	chr1:143729198-143729274	Testes	SRR333678	2	2	0	0						AC239800.1
JHU_ID_00286	JHU_ID_00286.5p	JHU_ID_00286.3p	ccggagccggcaggggga	uucccucccgccccggcaucugu	ccggagccggcagggggaagugacgucugucucucccuuuuuucccucccgccccggcaucugu	chr1:143729895-143729959	T cell leukemia	SRR1532969	3	2	0	1
JHU_ID_00287	JHU_ID_00287.5p		ucggcggcuguccccacccaggaga	ucugggggggcagucccugacc	ucggcggcuguccccacccaggagaggugcccugugcucucugggggggcagucccugacc	chr1:1437877-1437938	Hepatocellular carcinoma (HepG2)	ERR738403	2	2	0	0						VWA1
JHU_ID_00288	JHU_ID_00288.3p		augucucuguggcgcaaucgg	gcuagcguuuagugacagcu	gcuagcguuuagugacagcuuacccucuuuuagaacgaaaucaggagcucagccaugucucuguggcgcaaucgg	chr1:143831762-143831837	Testes	SRR333682	1210	1210	0	0		Ago_1181
JHU_ID_00289	JHU_ID_00289.3p		ugcuuacaccacaacuggggaa	ccccaauugugguguaagcauu	ccccaauugugguguaagcauuuuuagaggaugcuuacaccacaacuggggaa	chr1:143860606-143860659	BladderEpithelium	DRR013037	2	2	0	0
JHU_ID_00290	JHU_ID_00290.5p		ccgggcugaccucagacc	gcugguccucugcu	ccgggcugaccucagaccccggccuggccacucaggcuggggcugguccucugcu	chr1:1438680-1438735	Hepatocellular carcinoma (HepG2)	ERR738414	2	2	0	0						VWA1
JHU_ID_00292	JHU_ID_00292.5p/.3p		cccgcggcuggaggaaggggccac	uuccuuuuccuccgagcgccgggag	uuccuuuuccuccgagcgccgggaggaggaagcucccgcuagcgucucccacuucccgcggcuggaggaaggggccac	chr1:143973536-143973614	Fibroblast Dermal (adult)	SRR5127205	2	2	0	0
JHU_ID_00293	JHU_ID_00293.5p		ugccuguuuguagacuggacagg	ugugcccguuuauaaauauuugcauu	ugccuguuuguagacuggacagggaauaaaaccacuacucugugcccguuuauaaauauuugcauu	chr1:144012328-144012394	Retina	ERR973611	2	2	0	0
JHU_ID_00294	JHU_ID_00294.3p		ugcagauuguggaggcaacaggagg	ucuuggccucugcagccagu	ucuuggccucugcagccagucuauccccaucaguguggguugucugcagauuguggaggcaacaggagg	chr1:144065555-144065624	Testes	SRR553576	16	16	0	0
JHU_ID_00295	JHU_ID_00295.5p		uacuguagacccuggcuuggcaga	ugccucauaggaucccugcaaaaau	uacuguagacccuggcuuggcagaauuuccugacucuucaucauuagaaguucugccucauaggaucccugcaaaaau	chr1:144193530-144193608	Testes	SRR333688	10	10	0	0
JHU_ID_00298	JHU_ID_00298.5p		ucccagcugcucggagggcuga	ggaucguuugagccugggaga	ucccagcugcucggagggcugagguggaucguuugagccugggaga	chr1:1443790-1443836	Lung	SRR1608281	1	1	0	0
JHU_ID_00299	JHU_ID_00299.3p		cggagcuggcggaggaaguga	gcucuuccgccccacccuccgcc	gcucuuccgccccacccuccgccgacucagccgaucaacccgcugccggagcuggcggaggaaguga	chr1:144412229-144412296	Neuron iPSC	SRR1777168	16	16	0	0
JHU_ID_00300	JHU_ID_00300.3p		caagagccuggaacugcacca	gugcaguaccaggcucuuggu	gugcaguaccaggcucuuggugucccaaacaaagacaccaagagccuggaacugcacca	chr1:144420902-144420961	Islet Beta Cell	SRR873401	176	176	0	0		Ago_1189
JHU_ID_00301	JHU_ID_00301.3p		guuguuaugguaacuccccacg	uggggaagggggcgguacccaaccc	uggggaagggggcgguacccaacccccucuauuacuaggggguuguuaugguaacuccccacg	chr1:144485252-144485315	Embryonic kidney	SRR515902	1	1	0	0
JHU_ID_00302	JHU_ID_00302.3p		accugggggcuggcauuguggg	cucagcuucucuccccgacacc	cucagcuucucuccccgacaccuggacacuccucuuggcuaccugggggcuggcauuguggg	chr1:144519973-144520035	Testes	SRR333680	2	2	0	0
JHU_ID_00303	JHU_ID_00303.3p	JHU_ID_00303.5p	ucgcgcuuucuucuggagg	ccacauguggggaaacug	ccacauguggggaaacuggacuguaauuuguggugguggggaauugcguucgcgcuuucuucuggagg	chr1:144523854-144523922	Hepatocellular carcinoma (HepG2)	ERR738411	3	2	0	1
JHU_ID_00305	JHU_ID_00305.5p	JHU_ID_00305.3p	cccucaggaguuuguaggauuucug	aacuacgcagacgggggcuguu	cccucaggaguuuguaggauuucugugcuagcggggaauguguucucaccucacagagccagguacaaacuacgcagacgggggcuguu	chr1:144551333-144551422	Lung squamous carcinoma	SRR1013976	19	18	0	1
JHU_ID_00306	JHU_ID_00306.5p	JHU_ID_00306.3p	cuaaccagcgcgaagacugc	ugucuuucucgcuggagaagua	ugucuuucucgcuggagaaguaaggagugucagccgguuuauccuaggcuaaccagcgcgaagacugc	chr1:144551573-144551641	T cell leukemia	SRR1304307	167	124	0	43		Ago_1192
JHU_ID_00307	JHU_ID_00307.5p		uagauaaaggaagagcugugc	acgauucuuauuucucccgggg	uagauaaaggaagagcugugcggccuucgcgcuagcuagcuuguguaaaggucgacgauucuuauuucucccgggg	chr1:144560457-144560533	Testes	SRR333678	2	2	0	0						AC253578.1
JHU_ID_00308	JHU_ID_00308.5p	JHU_ID_00308.3p	ccggagccggcaggggga	uucccucccgccccggcaucugu	ccggagccggcagggggaagugacgucugucucucccuuuuuucccucccgccccggcaucugu	chr1:144561141-144561205	T cell leukemia	SRR1532969	3	2	0	1
JHU_ID_00311	JHU_ID_00311.5p		uacuguagacccuggcuuggcaga	ugccucauaggaucccugcaaaaau	uacuguagacccuggcuuggcagaauuuccugacucuucaucauuagaaguucugccucauaggaucccugcaaaaau	chr1:144772785-144772863	Testes	SRR333688	10	10	0	0
JHU_ID_00312	JHU_ID_00312.3p		ugcagauuguggaggcaacaggagg	ucuuggccucugcagccagu	ucuuggccucugcagccagucuauccccaucaguguggguugucugcagauuguggaggcaacaggagg	chr1:144894886-144894955	Testes	SRR553576	16	16	0	0						SRGAP2B
JHU_ID_00313	JHU_ID_00313.3p		uccugacccuguugcugacucug	gaggcaggagggcagggcggugggaag	gaggcaggagggcagggcggugggaagugauacucauggucacuuccugacccuguugcugacucug	chr1:144917339-144917406	Stromal cell Prostate	SRR5127226	1	1	0	0						SRGAP2B
JHU_ID_00314	JHU_ID_00314.5p		ugccuguuuguagacuggacagg	ugugcccguuuauaaauauuugcauu	ugccuguuuguagacuggacagggaauaaaaccacuacucugugcccguuuauaaauauuugcauu	chr1:145055560-145055626	Retina	ERR973611	2	2	0	0						SRGAP2B
JHU_ID_00315	JHU_ID_00315.5p		ugcugaggcugcggcuccggcucua	cagccgccgccgcacccggccucagcgcc	ugcugaggcugcggcuccggcucuagcacaggcaccagccgccgccgcacccggccucagcgcc	chr1:145093092-145093156	Bladder	DRR013041	2	2	0	0						SRGAP2B
JHU_ID_00316	JHU_ID_00316.5p/.3p		cccgcggcuggaggaaggggccac	uuccuuuuccuccgagcgccgggag	uuccuuuuccuccgagcgccgggaggaggaagcucccgcuagcgucucccacuucccgcggcuggaggaaggggccac	chr1:145094375-145094453	Fibroblast Dermal (adult)	SRR5127205	2	2	0	0						SRGAP2B
JHU_ID_00318	JHU_ID_00318.5p		gccgugaggggugugaucgcu	cggggcucgccccucgucggcuu	gccgugaggggugugaucgcuugagccggagcggggcucgccccucgucggcuu	chr1:145216111-145216165	Fibroblast Periodonal ligament	SRR5127227	1	1	0	0
JHU_ID_00319	JHU_ID_00319.3p	JHU_ID_00319.5p	caagagccuggaacugcacca	gugcaguuccaggcucuuggu	gugcaguuccaggcucuuggugucccaaacaaagacaccaagagccuggaacugcacca	chr1:145289412-145289471	Islet Beta Cell	SRR873401	198	193	0	5		Ago_1203
JHU_ID_00320	JHU_ID_00320.5p	JHU_ID_00320.3p	acauaaucaacugugccugaca	gcagacacagcugaugaugugc	acauaaucaacugugccugacauguggcacuuuguguugcagacacagcugaugaugugc	chr1:145462779-145462839	Colon adenocarcinoma	SRR1917336	2771	2767	0	4		Ago_1205
JHU_ID_00322	JHU_ID_00322.3p	JHU_ID_00322.5p	ugggauugcgaugaacucaggugu	ucuugagcucaggcaaucugcccgc	ucuugagcucaggcaaucugcccgcuuuggccucacaaauugcugggauugcgaugaacucaggugu	chr1:145708580-145708647	Colon adenocarcinoma	SRR1917329	83	81	0	2
JHU_ID_00323	JHU_ID_00323.3p		aaggucagcucugagcuccac	ggagcccggaucuaaccucuc	ggagcccggaucuaaccucucagaggagcuggaaggucagcucugagcuccac	chr1:145720611-145720664	Myoblast Skeletal Muscle	SRR1200834	3	3	0	0						CD160
JHU_ID_00324	JHU_ID_00324.3p		acugcucuccagcccggaccac	accuuggagguggagguugcaguga	accuuggagguggagguugcagugagcagagaucacgccacugcucuccagcccggaccac	chr1:145733169-145733230	Macrophage	SRR1532975	2	2	0	0						CD160
JHU_ID_00325	JHU_ID_00325.5p		aggcgcgguggcuuaggucug	ggccaggaguuugagaccagccugg	aggcgcgguggcuuaggucuguaaucccagugcuuugggaggacgaggcaggaggauugcuugaggccaggaguuugagaccagccugg	chr1:145822799-145822888	Thyroid	SRR1291269	2	2	0	0						RNF115
JHU_ID_00326	JHU_ID_00326.3p		cggugugggucggcuugc	aaggcacuaagacugga	aaggcacuaagacuggaggcggugugggucggcuugc	chr1:145927155-145927192	Platelet	SRR1592244	3	3	0	0						RP11-315I20.1
JHU_ID_00327	JHU_ID_00327.5p	JHU_ID_00327.3p	uuggagcagcucucggcgccc	ucucggcgaucgcugcuccucc	uuggagcagcucucggcgcccgcccgccggggucucggcgaucgcugcuccucc	chr1:14598689-14598743	Cervical cancer	SRR1304304	16	12	0	4		Ago_283
JHU_ID_00329	JHU_ID_00329.3p		cuggacacagccugaaacagcagc	ugcugccagguuggaggaauu	ugcugccagguuggaggaauuggugaucgucacaccacauuccugggucuggacacagccugaaacagcagc	chr1:146227909-146227981	Lung Adenocarcinoma	SRR1013979	2	2	0	0						NOTCH2NL
JHU_ID_00330	JHU_ID_00330.5p		cgcccaguagaacugaca	ucucuguggcgca	cgcccaguagaacugacaguaccugucucuguggcgca	chr1:146370077-146370115	CD8+ T Cell (Adult)	SRR1853806	2	2	0	0
JHU_ID_00331	JHU_ID_00331.5p	JHU_ID_00331.3p	ccggagccggcaggggga	uucccucccgccccggcaucugu	ccggagccggcagggggaagugacgucugucucucccuuuuucccucccgccccggcaucugu	chr1:146376433-146376496	T cell leukemia	SRR1532969	3	2	0	1
JHU_ID_00332	JHU_ID_00332.5p		uagauaaaggaagagcugugc	gcuucuuauuucucccgagg	uagauaaaggaagagcugugcggccuucgcgcuagcuagcuuguguaaaggucgacgcuucuuauuucucccgagg	chr1:146377102-146377178	Testes	SRR333678	2	2	0	0
JHU_ID_00334	JHU_ID_00334.3p		guuguuaugguaacuccccacg	gggggaagggggcgguacccaaccc	gggggaagggggcgguacccaacccccucuauuacuaggggguuguuaugguaacuccccacg	chr1:146448923-146448986	Embryonic kidney	SRR515902	1	1	0	0
JHU_ID_00335	JHU_ID_00335.3p		cccaguggaaucgcuaguaccug	gggaugggggaguucggugagugcg	gggaugggggaguucggugagugcgcccugccuacagcgcccaguggaaucgcuaguaccug	chr1:146486644-146486706	Epithelium Retinal Pigment	SRR493013	13	13	0	0
JHU_ID_00336	JHU_ID_00336.3p		uuuggguaggggcagaacagca	ccguucuacccccacccaaacc	ccguucuacccccacccaaaccagaguaagccaucccugguuuggguaggggcagaacagca	chr1:146592462-146592524	Thyroid	SRR1291267	11	11	0	0
JHU_ID_00337	JHU_ID_00337.5p		uaggguguuaucaaaacu	uuuuguucuguccauc	uaggguguuaucaaaacucauuuccuuggguuuuguucuguccauc	chr1:146767514-146767560	Platelet	ERR747966	140	140	0	0
JHU_ID_00338	JHU_ID_00338.5p		acggagcagcuucgggggcacgu	guccuguggagcacacugacuucgcac	acggagcagcuucgggggcacgucuucggaaguccuguggagcacacugacuucgcac	chr1:146939255-146939313	Plasma	SRR822443	1	1	0	0						NBPF12
JHU_ID_00342	JHU_ID_00342.5p	JHU_ID_00342.3p	cacugaauuccauuuguggacu	auccacuuuugggguucagaga	cacugaauuccauuuguggacugaaaaguauucaauccacuuuugggguucagaga	chr1:147158152-147158208	Fibroblast Aorta Adventitia	SRR5127206	12	9	0	3	TJU_CMC_MD2.ID00189.5p-miR					PRKAB2
JHU_ID_00343	JHU_ID_00343.5p		uggccaggugaguuuugaacuc	gugauucaccuggcucag	uggccaggugaguuuugaacuccugaccucgggugauucaccuggcucag	chr1:147214215-147214265	Hepatocellular carcinoma (HepG2)	ERR738406	2	2	0	0						FMO5
JHU_ID_00345	JHU_ID_00345.3p		gccuggucucuagcucugac	ccagcuagccagcag	ccagcuagccagcaggugguagggucagauuacauuugcucuccccugccuggucucuagcucugac	chr1:147505111-147505178	Cervical cancer	SRR1304304	3	3	0	0						LINC00624
JHU_ID_00346	JHU_ID_00346.3p		gagacugggaaaucugau	gggauagacccagcugga	gggauagacccagcuggagcuucggagccaggaaagggcuggaagaagagacugggaaaucugau	chr1:147526705-147526770	Biliosphere	ERR842914	16	16	0	0
JHU_ID_00347	JHU_ID_00347.5p		cugaggggccggcggggcgg	uccccacgcgcucacucuccc	cugaggggccggcggggcgggagguucggcacgggagggucuccucuucccguccccuccuccccacgcgcucacucuccc	chr1:147599540-147599621	BladderEpithelium	DRR013036	2	2	0	0		Ago_1227				BCL9
JHU_ID_00348	JHU_ID_00348.5p	JHU_ID_00348.3p	gccggagugggacggcgccgcc	ccgcugccgcuggccccggccc	gccggagugggacggcgccgccgccgccgcugccgccgccggggggagacgcugcgccgccgcugccgcuggccccggccc	chr1:147600175-147600256	Thyroid	SRR1291267	5	4	0	1						BCL9
JHU_ID_00349	JHU_ID_00349.5p		uggaaguggaggcauggucuagc	uggcuagugcuuucaccuugauc	uggaaguggaggcauggucuagcugcuucgcugaguuggcuagugcuuucaccuugauc	chr1:147611452-147611511	Neuron iPSC	SRR1777169	2	2	0	0						BCL9
JHU_ID_00351	JHU_ID_00351.5p		aauuaauggauuuuggggga	ucccacaauccuuucucucc	aauuaauggauuuugggggaagugucaacacaggacuaagaugccccucccugcucucuucccacaauccuuucucucc	chr1:147837817-147837896	Hepatocellular carcinoma	SRR609258	136	136	0	0		Ago_1229
JHU_ID_00352	JHU_ID_00352.5p	JHU_ID_00352.3p	acauaaucaacugugccugaca	gcagacacagcugaugaugugc	acauaaucaacugugccugacauguggcacuuuguguugcagacacagcugaugaugugc	chr1:148035907-148035967	Colon adenocarcinoma	SRR1917336	2771	2767	0	4		Ago_1234
JHU_ID_00353	JHU_ID_00353.3p	JHU_ID_00353.5p	uugcagaucgcuucauag	cgugagcucuuuuaacacuaagu	cgugagcucuuuuaacacuaaguggccgcagggcucuucucuucccuuucuacuuggggcugcuuuuugcagaucgcuucauag	chr1:148038527-148038611	Epithelium Intestinal	SRR5127223	5	3	1	1
JHU_ID_00354	JHU_ID_00354.5p		aggcgcgguggcuuaggucug	ggccaggaguuugagaccagccugg	aggcgcgguggcuuaggucuguaaucccagugcuuugggaggacgaggcaggaggauugcuugaggccaggaguuugagaccagccugg	chr1:148078030-148078119	Thyroid	SRR1291269	2	2	0	0
JHU_ID_00355	JHU_ID_00355.3p		cgugggcgcuggggaaga	uucccugcgcuugauuccucgcc	uucccugcgcuugauuccucgccugccgcugcagcccgcagcccuccucucgugggcgcuggggaaga	chr1:148151520-148151588	Skin	SRR2174517	9	9	0	0						NBPF11
JHU_ID_00357	JHU_ID_00357.5p/.3p		acacucaucaacugugccugaca	gcaggcacaguugaugaugugc	acacucaucaacugugccugacauguggcacuuuguguugcaggcacaguugaugaugugc	chr1:148331638-148331699	Colon adenocarcinoma	SRR1917329	1537	1537	0	0		Ago_1243				RP11-495P10.3
JHU_ID_00358	JHU_ID_00358.5p	JHU_ID_00358.3p	uggcugcacaauaacaguggaga	uccgcugaaaucuugcagugca	uggcugcacaauaacaguggagaacugcguuagugcuuuccgcugaaaucuugcagugca	chr1:148334596-148334656	Nasopharyngeal carcinoma	SRR1564521	14	8	0	6		Ago_1245				RP11-495P10.3
JHU_ID_00359	JHU_ID_00359.3p		accuuggugucugcuggcc	ugagcacccuggacucugaaucaa	ugagcacccuggacucugaaucaagcgauccgaguucaaaucucggugguaccuuggugucugcuggcc	chr1:148353579-148353648	Testes	SRR333682	46	46	0	0
JHU_ID_00360	JHU_ID_00360.5p		acacucaucaacugugccugaca	ucaggcacagacaaugagugugc	acacucaucaacugugccugacaugccaagugccacaugucaggcacagacaaugagugugc	chr1:148357175-148357237	Colon adenocarcinoma	SRR1917329	1530	1530	0	0		Ago_1246
JHU_ID_00361	JHU_ID_00361.5p		gccggaccgggaaaggug	cgauuccuguguagaugaggcau	gccggaccgggaaaggugcugucggugacaucacggauagggcgauuccuguguagaugaggcau	chr1:148362744-148362809	Placenta	SRR822459	2	1	1	0
JHU_ID_00362	JHU_ID_00362.5p	JHU_ID_00362.3p	ucccucccgccccggcaucugu	aacuuucgguggccagaug	ucccucccgccccggcaucuguuuucgcccaaagaagcugguccuuagccuaucuugugaagcaaacuuucgguggccagaug	chr1:148388985-148389068	Macrophage	SRR1532975	14	11	1	2
JHU_ID_00364	JHU_ID_00364.3p	JHU_ID_00364.5p	cucccccuaagacugugguacu	ugccauuguccuuuggggagg	ugccauuguccuuuggggagguucgcagagaccccgcgucuggucucccccuaagacugugguacu	chr1:148522153-148522219	Lung Adenocarcinoma	SRR1013980	145	140	1	4
JHU_ID_00365	JHU_ID_00365.3p	JHU_ID_00365.5p	auggucgcggcuuauccauug	aggggagauaccaugaucau	aggggagauaccaugaucaugaaggcgcuuuucucauggucgcggcuuauccauug	chr1:148522614-148522670	Lung	SRR1608275	57	55	0	2		Ago_1250
JHU_ID_00366	JHU_ID_00366.3p	JHU_ID_00366.5p	caagagccuggaacugcacca	gugcaguuccaggcucuuggu	gugcaguuccaggcucuuggugucccaaacaaagacaccaagagccuggaacugcacca	chr1:148530903-148530962	Islet Beta Cell	SRR873401	198	193	0	5		Ago_1251
JHU_ID_00367	JHU_ID_00367.3p		ugugcaggcuuugcagaggca	cccggcaggggcuccacacu	cccggcaggggcuccacacuccagguggagugugcaggcuuugcagaggca	chr1:1486451-1486502	Retina	ERR973618	2	2	0	0						ATAD3B
JHU_ID_00368	JHU_ID_00368.3p		uguccucagcuuuccugggcug	gcaaagggcagcaggcagg	gcaaagggcagcaggcaggucagcuggcauggccccucgucuggggcuugucccuggcuauguccucagcuuuccugggcug	chr1:14867759-14867841	Brain, Prefrontal Cortex	ERR409887	2	2	0	0
JHU_ID_00369	JHU_ID_00369.3p		cuggacacagccugaaacagcagc	ugcugccagguuggaggaauu	ugcugccagguuggaggaauuggugaucgucacaccacauuccugggucuggacacagccugaaacagcagc	chr1:148678662-148678734	Lung Adenocarcinoma	SRR1013979	2	2	0	0						NBPF14
JHU_ID_00371	JHU_ID_00371.5p		ccucagggucccgcucggcgcg	caggcgcagcggggccuuaaaggua	ccucagggucccgcucggcgcgucaggagagcccaaggcgcaggcgcagcggggccuuaaaggua	chr1:149103528-149103593	CD3+ T Cell Splenic	SRR5127200	2	2	0	0						NBPF9
JHU_ID_00372	JHU_ID_00372.3p		guuguuaugguaacuccccacg	uggggaagggggcgguacccaaccc	uggggaagggggcgguacccaacccccucuauuacuaggggguuguuaugguaacuccccacg	chr1:149124167-149124230	Embryonic kidney	SRR515902	1	1	0	0
JHU_ID_00373	JHU_ID_00373.3p	JHU_ID_00373.5p	ucgcgcuuucuucuggagg	ccacauguggggaaacug	ccacauguggggaaacuggacuguaauuuguggugguggggaauugcguucgcgcuuucuucuggagg	chr1:149162777-149162845	Hepatocellular carcinoma (HepG2)	ERR738411	3	2	0	1
JHU_ID_00374	JHU_ID_00374.3p	JHU_ID_00374.5p	cccccggggggcagcgcucggc	cugagcgguggcggccgggaa	cugagcgguggcggccgggaauggagccugcugcgcugcgcucguaagcugcgcccggcgccgaggacccccggggggcagcgcucggc	chr1:149176634-149176723	Islet Alpha Cell	SRR1028924	6	4	0	2						CH17-189H20.1
JHU_ID_00375	JHU_ID_00375.3p		aggccggaagcagccccgcc	cgggaauuucccggucggg	cgggaauuucccggucggggaggccggaagcagccccgcc	chr1:149176886-149176926	Platelet	SRR1592244	1	1	0	0						CH17-189H20.1
JHU_ID_00376	JHU_ID_00376.3p		ccgggcgggaggcgaggg	cuccauuugguggaguc	cuccauuugguggagucaggggaggccuggccgggcgggaggcgaggg	chr1:149177038-149177086	Cumulus Oophorus	ERR457737	11	11	0	0						CH17-189H20.1
JHU_ID_00377	JHU_ID_00377.3p		gagauucuguaggcauggacugc	uuaccagguagccggaguuauaauuag	uuaccagguagccggaguuauaauuagccucguugcuagggcaaggcugagauucuguaggcauggacugc	chr1:149229883-149229954	Retina	ERR973601	10	10	0	0						CH17-189H20.1
JHU_ID_00379	JHU_ID_00379.5p		ggcacuccgcgggggccgccacaug	ggugcggucccagggggccga	ggcacuccgcgggggccgccacauggcucacaggugcggucccagggggccga	chr1:14924917-14924970	Placenta	SRR822452	1	1	0	0
JHU_ID_00380	JHU_ID_00380.5p		ucacccugaauuccuggcuccuu	ggcgcugggcagggugcua	ucacccugaauuccuggcuccuugagccccgcagaggagccaaggcgcugggcagggugcua	chr1:14932091-14932153	Thyroid	SRR1658404	1	1	0	0
JHU_ID_00381	JHU_ID_00381.3p		cuggacacagccugaaacagcagc	ugcugccagguuggaggaauu	ugcugccagguuggaggaauuggugaucgucacaccacauuccugggucuggacacagccugaaacagcagc	chr1:149391650-149391722	Lung Adenocarcinoma	SRR1013979	2	2	0	0						NBPF19
JHU_ID_00383	JHU_ID_00383.3p		cccgaugugaaacuggauc	ucugggauuuuucagaggggc	ucugggauuuuucagaggggcacggggaucacauccuggugucccgaugugaaacuggauc	chr1:14945418-14945479	Placenta	SRR822458	1	1	0	0
JHU_ID_00384	JHU_ID_00384.3p		uggccagcugccuccuccagc	uggggaagugcuggccucu	uggggaagugcuggccucugcucagggccuggccagcugccuccuccagc	chr1:14949324-14949374	Lung squamous carcinoma	SRR1013975	2	2	0	0
JHU_ID_00385	JHU_ID_00385.3p	JHU_ID_00385.5p	caagagccuggaacugcacca	gugcaguuccaggcucuuggu	gugcaguuccaggcucuuggugucccaaacaaagacaccaagagccuggaacugcacca	chr1:149556790-149556849	Islet Beta Cell	SRR873401	179	176	0	3		Ago_1269
JHU_ID_00386	JHU_ID_00386.5p		ccugaggaugcaagggacgga	cgugcgugcgcccuuccuau	ccugaggaugcaagggacggaggaaguuucgugcgugcgcccuuccuau	chr1:149558519-149558568	Breast adenocarcinoma	SRR029054	33	33	0	0
JHU_ID_00388	JHU_ID_00388.3p	JHU_ID_00388.5p	uuugcuguggaugugcuga	gguuuuuccagagcaaggcuua	gguuuuuccagagcaaggcuuagcaauuuugcuguggaugugcuga	chr1:149636805-149636851	Lung	SRR1608271	4	2	0	2
JHU_ID_00389	JHU_ID_00389.3p		augucucuguggcgcaaucgg	gcuagcguuuagugacagcu	gcuagcguuuagugacagcuuacccucuuauagaacgaaauuaggagcucagccaugucucuguggcgcaaucgg	chr1:149740302-149740377	Testes	SRR333682	1014	1014	0	0		Ago_1272
JHU_ID_00390	JHU_ID_00390.3p		ugcuuacaccacaacuggggaa	ccccaauugugguguaagcauu	ccccaauugugguguaagcauuuuuagaggaugcuuacaccacaacuggggaa	chr1:149768518-149768571	BladderEpithelium	DRR013037	2	2	0	0
JHU_ID_00392	JHU_ID_00392.3p		acaccccuucggccuuuaaccug	gggaaggaggcggggggugguu	gggaaggaggcggggggugguucuacaccccuucggccuuuaaccug	chr1:149811600-149811647	Retina	ERR973611	5	5	0	0
JHU_ID_00393	JHU_ID_00393.3p		uggaaccuggggauguuggugu	cccagcuucucaggcccagu	cccagcuucucaggcccaguaguaacugagcagagacuggaaccuggggauguuggugu	chr1:149839255-149839314	T cell leukemia	SRR1292461	16	16	0	0		Ago_1277
JHU_ID_00394	JHU_ID_00394.5p		agcgggacgugcuccucgu	gagcggguagugcucgcuag	agcgggacgugcuccucguccccacccccgauggggagggcccugagcggguagugcucgcuag	chr1:149841764-149841828	B Cell Centrocyte	SRR060982	1	1	0	0
JHU_ID_00395	JHU_ID_00395.5p	JHU_ID_00395.3p	gacuuucccgaucgccaggcagg	augucuggucguggcaagc	gacuuucccgaucgccaggcaggaguuucucucggugacuacuaucgcugucaugucuggucguggcaagc	chr1:149842679-149842750	Lung Adenocarcinoma	SRR1304309	17	15	1	1
JHU_ID_00396	JHU_ID_00396.5p	JHU_ID_00396.3p	gacuuucccgaucgccaggcagg	augucuggucguggcaagc	gacuuucccgaucgccaggcaggaguuucucucggugacuacuaucgcugucaugucuggucguggcaagc	chr1:149851062-149851133	Lung Adenocarcinoma	SRR1304309	17	15	1	1						HIST2H2AA4
JHU_ID_00397	JHU_ID_00397.5p		agcgggacgugcuccucgu	gagcggguagugcucgcuag	agcgggacgugcuccucguccccacccccgauggggagggcccugagcggguagugcucgcuag	chr1:149851984-149852048	B Cell Centrocyte	SRR060982	1	1	0	0
JHU_ID_00398	JHU_ID_00398.5p	JHU_ID_00398.3p	uggaaccuggggauguuggugu	cccagcuucucaggcccagu	cccagcuucucaggcccaguaguaacugagcagagacuggaaccuggggauguuggugu	chr1:149854498-149854557	T cell leukemia	SRR1292461	20	18	0	2		Ago_1283
JHU_ID_00399	JHU_ID_00399.5p		gucaaaugaagggcugaucacgaa	agcgcauuagcucuuuuuuugaaaa	gucaaaugaagggcugaucacgaaauagcgcauuagcucuuuuuuugaaaa	chr1:149887413-149887464	T cell leukemia	SRR1292461	296	296	0	0		Ago_1285
JHU_ID_00400	JHU_ID_00400.5p	JHU_ID_00400.3p	uagagcuccgaucccauccac	agauggggccagaguguucuaga	agauggggccagaguguucuagagauccagacucuagagcuccgaucccauccac	chr1:149928392-149928447	Lung Adenocarcinoma	SRR1013980	959	863	0	96	TJU_CMC_MD2.ID00192.3p-miR	Ago_1288
JHU_ID_00401	JHU_ID_00401.3p		caggagaaagggcugaugc	gccggccucucccagu	gccggccucucccaguccccaggagaaagggcugaugc	chr1:14996716-14996754	Bladder	DRR013044	2	2	0	0
JHU_ID_00404	JHU_ID_00404.5p		ucgcgcuccgccguggcgaggag	cccgcgcggcgaggacgggg	ucgcgcuccgccguggcgaggagacaaugggagagaaaaccagagaaacgccguuaguccccgcgcggcgaggacgggg	chr1:150150545-150150624	T cell leukemia	SRR1292458	5	5	0	0						PLEKHO1
JHU_ID_00405	JHU_ID_00405.5p		ucuccccauccuugcuuccaacc	uuggggugagguuggggugggc	ucuccccauccuugcuuccaaccccaggguuggggugagguuggggugggc	chr1:150163729-150163780	Dendritic	SRR1708917	2	2	0	0
JHU_ID_00406	JHU_ID_00406.3p	JHU_ID_00406.5p	ugaggccgagaaggcaaccgcga	gcguuguccucgcgccuucgcc	gcguuguccucgcgccuucgcccuggguaggugaggccgagaaggcaaccgcga	chr1:150234737-150234791	Colon adenocarcinoma	SRR1917336	1684	1682	0	2	TJU_CMC_MD2.ID00194.3p-miR	Ago_1293				ANP32E
JHU_ID_00407	JHU_ID_00407.3p	JHU_ID_00407.5p	ccaaacugcagguuuauucagu	gugaauaaaccuguugucugugg	gugaauaaaccuguugucugugggugcccuucuccagucuucuccaaacugcagguuuauucagu	chr1:150281044-150281109	Skin	SRR1259236	7	6	0	1
JHU_ID_00408	JHU_ID_00408.5p	JHU_ID_00408.3p	uccagcuggagaagugacuuca	uuguccucucuucacugcag	uccagcuggagaagugacuucaaagacugauuguuguccucucuucacugcag	chr1:150344109-150344162	Cervical cancer	SRR1304304	18	17	0	1						PRPF3
JHU_ID_00409	JHU_ID_00409.5p/.3p		aggaguugggggcgauggcug	gccauuuugucgcgcguugcuccucc	gccauuuugucgcgcguugcuccuccgaggaguugggggcgauggcug	chr1:150363718-150363766	Dendritic	SRR1708909	3	3	0	0
JHU_ID_00410	JHU_ID_00410.5p		cccgccaucacgccucccucug	gggguagggggguggggc	cccgccaucacgccucccucugcuuucaagguugagaaggaagcagggguagggggguggggc	chr1:150364065-150364128	Skin	SRR2174529	22	22	0	0		Ago_1295
JHU_ID_00411	JHU_ID_00411.5p	JHU_ID_00411.3p	uccuccucgucggccucuucggc	ggaagauggcggccggcggcggcggagg	ggaagauggcggccggcggcggcggaggcagcaguaaggccuccuccucgucggccucuucggc	chr1:150364710-150364774	Blood	SRR1949839	350	310	0	40	TJU_CMC_MD2.ID00195.3p-miR	Ago_1297				RPRD2
JHU_ID_00412	JHU_ID_00412.5p		agaggcgggcguggguuuggga	ugaggcuccgcuugccccugg	agaggcgggcguggguuugggagcaacugaggcuccgcuugccccugg	chr1:150515438-150515486	Platelet	SRR1592245	2	2	0	0
JHU_ID_00413	JHU_ID_00413.3p		acugcagccuccgaccccggcug	gccgggcacgaggacagcgc	gccgggcacgaggacagcgcccgggagcgacugcagccuccgaccccggcug	chr1:150549144-150549196	Epithelium Keratinocyte (Neonatal)	SRR5127208	1	1	0	0						RP11-54A4.2
JHU_ID_00414	JHU_ID_00414.3p	JHU_ID_00414.5p	cggccgaggcggccgugaccg	gcggggcugggcgggggcg	gcggggcugggcgggggcgggcgcgagggcggaguugcggccgaggcggccgugaccg	chr1:150549339-150549397	Dendritic	SRR1708917	3	2	0	1						RP11-54A4.2
JHU_ID_00415	JHU_ID_00415.5p	JHU_ID_00415.3p	ccccggcugcaccucuccuucc	aaugagaggccuguggcuggggca	aaugagaggccuguggcuggggcaugaggcagccccggcugcaccucuccuucc	chr1:150551166-150551220	Dendritic	SRR1708913	22	17	0	5						ADAMTSL4
JHU_ID_00416	JHU_ID_00416.3p		cccccucuggcuccagucugac	ccggcugggggcggagggcagug	ccggcugggggcggagggcaguguugcaacacccccucuggcuccagucugac	chr1:150552463-150552516	Dendritic	SRR1708906	64	64	0	0		Ago_1302
JHU_ID_00417	JHU_ID_00417.5p		ggcugaaccuggggagcaggugg	cccugcccugagguggucagaugc	ggcugaaccuggggagcaggugggaggcucaggucagcggaagagcuccaagaccccugcccugagguggucagaugc	chr1:150554229-150554307	Bladder	SRR333672	2	2	0	0
JHU_ID_00418	JHU_ID_00418.3p		ccacugccucaccucacucuc	gggugggguugagguggugucuggcg	gggugggguugagguggugucuggcguucuguggccacugccucaccucacucuc	chr1:150556102-150556157	Placenta	SRR567645	8	8	0	0		Ago_1304
JHU_ID_00419	JHU_ID_00419.5p	JHU_ID_00419.3p	aggcggccugagaggggc	ccuccuuccuccuccuac	ccuccuuccuccuccuacucgcuucucucaagguagagaacuugcuagaggcggccugagaggggc	chr1:150561494-150561560	Colon adenocarcinoma	SRR1917329	18	15	2	1						ADAMTSL4-AS1
JHU_ID_00420	JHU_ID_00420.3p	JHU_ID_00420.5p	ugaacuguuagauaauggaauu	uuuccauuacaugacaguagacu	uuuccauuacaugacaguagacugcuuauuauguaucaugaacuguuagauaauggaauu	chr1:150571118-150571178	Colon adenocarcinoma	SRR1917323	12	6	0	6
JHU_ID_00421	JHU_ID_00421.3p	JHU_ID_00421.5p	aagggaggauuugcuuagaagga	uucgggcaaauccuccaaaaggg	uucgggcaaauccuccaaaagggaaagggaggauuugcuuagaagga	chr1:150574810-150574857	Breast adenocarcinoma	SRR960732	18	13	0	5						MCL1
JHU_ID_00423	JHU_ID_00423.5p		aucaguguagcaaaaggagagaagc	uggcucuguugacccuagcuguggg	aucaguguagcaaaaggagagaagccaacuacccccucuuucacagaggcgagcuggcuggcucuguugacccuagcuguggg	chr1:150604442-150604525	Lung squamous carcinoma	SRR1013976	2	2	0	0						ENSA
JHU_ID_00424	JHU_ID_00424.5p	JHU_ID_00424.3p	agcccaggacgagacugcagug	ugcacuccagccugggcaacau	agcccaggacgagacugcagugcacaauuaucgugcuugugacuagccacugcacuccagccugggcaacau	chr1:150615440-150615512	Lung	SRR1608278	18	15	0	3
JHU_ID_00426	JHU_ID_00426.5p		uagccaccaugccugguuagu	aggccgggagugguggcuuaug	uagccaccaugccugguuaguccuguucuuuuaaaaaugacaguaagaggccgggagugguggcuuaug	chr1:150843713-150843782	Nasopharyngeal epithelial cell	SRR1564522	3	3	0	0
JHU_ID_00427	JHU_ID_00427.3p		gccaaccccggugaggaga	ucccacuggggggggggg	ucccacuggggggggggguggcgcggcggcgguggcaucugcggccauggcggcgacuacugccaaccccggugaggaga	chr1:150876533-150876613	Breast adenocarcinoma	SRR873383	2	2	0	0
JHU_ID_00428	JHU_ID_00428.3p		acagagggaaaauaccaaag	uugguauuuucccucuguac	uugguauuuucccucuguacucuguaggagaaagguguacagagggaaaauaccaaag	chr1:150902847-150902905	Placenta	SRR822459	1	1	0	0
JHU_ID_00429	JHU_ID_00429.3p		gucugguuggugaaaaagagcccu	cgcucuuuuccgucgaggccgaccc	cgcucuuuuccgucgaggccgaccccugaguugugagucuggggucugguuggugaaaaagagcccu	chr1:150926432-150926499	Neuron iPSC	SRR1777168	2	2	0	0						SETDB1
JHU_ID_00430	JHU_ID_00430.3p		ugggcaggcuuuguggaugggc	ccaucuccaggccuucagccccga	ccaucuccaggccuucagccccgaguuuagauaucugggcaggcuuuguggaugggc	chr1:150977564-150977621	Platelet	SRR1592249	45	45	0	0
JHU_ID_00431	JHU_ID_00431.5p		ccccuuggagagauucggcg	cuuccuucgguucucccuaaaucug	ccccuuggagagauucggcgugaggaaacaggaggccucacgcuuccuucgguucucccuaaaucug	chr1:150979271-150979338	Dendritic	SRR1708909	4	4	0	0
JHU_ID_00432	JHU_ID_00432.5p		uagcuuagagcuguguaccu	gugagcagcuccaaagauagg	uagcuuagagcuguguaccuccagaauuugguggugagcagcuccaaagauagg	chr1:150994266-150994320	RPE/Choroid	ERR973609	4	4	0	0						ANXA9
JHU_ID_00435	JHU_ID_00435.5p	JHU_ID_00435.3p	agucccgccuccugacucuggcc	ccggggucggaggccgauucg	ccggggucggaggccgauucgccguguggcggguucgagucccgccuccugacucuggcc	chr1:151008469-151008529	Red Blood Cell	SRR1664897	6	5	0	1		Ago_1316
JHU_ID_00436	JHU_ID_00436.3p		ucccagagccacccagaacccug	gguggccuggcuguuucuuuggauc	gguggccuggcuguuucuuuggaucccucugucccagagccacccagaacccug	chr1:151034883-151034937	Islet Alpha Cell	SRR1028924	8	8	0	0
JHU_ID_00437	JHU_ID_00437.3p		ucccuuuuucucuauuuuuu	gaugaagcaaggaagggaaa	gaugaagcaaggaagggaaaagaauauagaugugguuguaauuucccuuuuucucuauuuuuu	chr1:151050363-151050426	Brain, Frontal Cortex	SRR553572	84	84	0	0						C1orf56
JHU_ID_00438	JHU_ID_00438.5p		gaggcugggcugggaagcggug	gcacuuuccuuuccagcccug	gaggcugggcugggaagcggugugacuucucacggcacuuuccuuuccagcccug	chr1:151070974-151071029	T cell leukemia	SRR1292463	12	12	0	0						GABPB2
JHU_ID_00439	JHU_ID_00439.3p		uuccaggcaucugcucccucugc	uuggggaggaggcaacgggaca	uuggggaggaggcaacgggacaggagggaauaggcuauggagccagacuccaagacccuaaagguuccaggcaucugcucccucugc	chr1:151138412-151138499	Astrocytes	SRR5127214	2	2	0	0		Ago_1317				SEMA6C
JHU_ID_00440	JHU_ID_00440.3p		gccgagcccuuccgcgaugag	cucgcgggaaccucacccg	cucgcgggaaccucacccgaggcggcaccggcgcccgggcaagccgagcccuuccgcgaugag	chr1:1511708-1511771	SkinDermis	SRR1259222	3	3	0	0
JHU_ID_00441	JHU_ID_00441.3p		uccgggccgucgucuucgguc	uugaaagagagccaggccgcugagg	uugaaagagagccaggccgcugagggggagggggcugcuaagauggcgucggccuccuccgggccgucgucuucgguc	chr1:151198955-151199033	Brain, Prefrontal Cortex	ERR409896	2	2	0	0						PIP5K1A
JHU_ID_00442	JHU_ID_00442.5p		gcccgggcccggacgcugacccgc	agguucugcuccggccuggccc	gcccgggcccggacgcugacccgcacccagucggggugcagguucugcuccggccuggccc	chr1:151282745-151282806	Retina	ERR973613	22	22	0	0						ZNF687
JHU_ID_00443	JHU_ID_00443.5p	JHU_ID_00443.3p	cuuccucuuggagccugguuuucc	acaacuagucuccaaggccuggg	acaacuagucuccaaggccugggacugaccagccccuuccucuuggagccugguuuucc	chr1:151291202-151291261	Neuron iPSC	SRR1777168	9	8	0	1		Ago_1321				ZNF687
JHU_ID_00444	JHU_ID_00444.5p/.3p		gagggcugugggaauucccuuc	agggaauuccacauggcuaggcca	agggaauuccacauggcuaggccaguacccucaguacacuggagggcugugggaauucccuuc	chr1:151292218-151292281	Neural Stem Cell	SRR1988281	2	2	0	0		Ago_1322				PI4KB
JHU_ID_00445	JHU_ID_00445.3p		gugaccucggaggcagaa	augcuggaggucacag	augcuggaggucacaggcugcccaggcagguuggugaccucggaggcagaa	chr1:151328237-151328288	Biliosphere	ERR842917	1	1	0	0						RP11-126K1.9
JHU_ID_00446	JHU_ID_00446.3p		ugaggcugggaccauaggcaca	ugccuguggucccagcuacuccag	ugccuguggucccagcuacuccagaggcugaggcugggaccauaggcaca	chr1:151359304-151359354	Blood	SRR1949842	1	1	0	0
JHU_ID_00447	JHU_ID_00447.5p	JHU_ID_00447.3p	agggaguaguggacucugcuu	guccccagucugcacaccc	agggaguaguggacucugcuucauuguccccagucugcacaccc	chr1:151372490-151372534	Epithelium Colonic Epithelium (flow)	SRR5127219	3	2	0	1						SELENBP1
JHU_ID_00449	JHU_ID_00449.3p		ucgggcucgggcucgggcaaagc	uugcguucgggcucgggcucgggc	uugcguucgggcucgggcucgggcucgggcucgggcucgggcucgggcucgggcaaagc	chr1:151511430-151511489	Biliosphere	ERR842904	1	1	0	0						CGN
JHU_ID_00451	JHU_ID_00451.5p		aggacuggaggauuaagggguuggc	cagagggcccuagaauccuuggcuccuag	aggacuggaggauuaagggguuggcugagggugccagagggcccuagaauccuuggcuccuag	chr1:151704593-151704656	Islet Alpha Cell	SRR1028924	4	4	0	0						CELF3
JHU_ID_00452	JHU_ID_00452.5p	JHU_ID_00452.3p	aggggaagggagacaggguuggc	ucucuucuccccaccccagcag	aggggaagggagacaggguuggcugggagggcucaagaagucagggaagccccaucagccucucucuucuccccaccccagcag	chr1:151706358-151706442	BrainPrefrontalCortex	SRR1759215	1	1	0	0		Ago_1329				CELF3
JHU_ID_00453	JHU_ID_00453.3p		ucucuggugguggggacugagca	cugggccccaccccagacuaa	cugggccccaccccagacuaauuaaauaaaacucucuggugguggggacugagca	chr1:151727965-151728020	Brain, Prefrontal Cortex	SRR1759214	1	1	0	0						RIIAD1
JHU_ID_00455	JHU_ID_00455.3p		uagggcugggaggcgcggga	ccggccccgcccugca	ccggccccgcccugcagacgcgggaugcgguagggcugggaggcgcggga	chr1:151839785-151839835	Melanoma	SRR1913138	9	9	0	0						C2CD4D
JHU_ID_00457	JHU_ID_00457.5p/.3p		uuagggcuccccugugcuggc	cagaaaacggggugggcuuaaugc	cagaaaacggggugggcuuaaugcaucccagaaucuggcuuagggcuccccugugcuggc	chr1:151992736-151992796	Stromal cell Prostate	SRR5127226	2	2	0	0						S100A10
JHU_ID_00460	JHU_ID_00460.3p		ucucagguguucugugggauggc	uaucccuucaagcgccucucacu	uaucccuucaagcgccucucacuuccuguugccucugcucuaauuccuggcccucagcucucucagguguucugugggauggc	chr1:152044054-152044137	Testes	SRR333688	5	5	0	0
JHU_ID_00461	JHU_ID_00461.5p		acaacaugggucuggcucaggac	caugagucuagaucacaucagucc	acaacaugggucuggcucaggacaauccucuggcuuuggacagcaugagucuagaucacaucagucc	chr1:152355256-152355323	Skin	SRR2174513	3	3	0	0						FLG2
JHU_ID_00462	JHU_ID_00462.3p		ccggccccauccuccuggau	gcaggaggagggguggcuc	gcaggaggagggguggcuccccggccccauccuccuggau	chr1:15247471-15247511	Neuron Dopaminergic	SRR5127234	34	34	0	0		Ago_292				FHAD1
JHU_ID_00463	JHU_ID_00463.5p	JHU_ID_00463.3p	ccaggaucacaggcaagaggccu	aacuugccugggacccuacaacuc	aacuugccugggacccuacaacucagagggcagagccaggaucacaggcaagaggccu	chr1:15260190-15260248	Dendritic	SRR1708906	7	4	0	3						FHAD1
JHU_ID_00464	JHU_ID_00464.5p		gccagggcucugguaagacugug	cugucaaucagagccuugcuca	gccagggcucugguaagacugugagucugggagcagagggaaagaggaaguuugucggcuucccuccugucaaucagagccuugcuca	chr1:15261630-15261718	Bladder	SRR333672	2	2	0	0						FHAD1
JHU_ID_00465	JHU_ID_00465.5p		ucuccucugugugcuugcuagaaga	accuggggaggaggagaggcugugc	ucuccucugugugcuugcuagaagacguuaggugaccuggggaggaggagaggcugugc	chr1:153308708-153308767	SkinEpidermis	SRR1259212	10	10	0	0						PGLYRP3
JHU_ID_00466	JHU_ID_00466.3p	JHU_ID_00466.5p	aaugcagguacaaggaagca	uuuccuuguaccuggauugg	uuuccuuguaccuggauuggccuuaugcgggauggccaaugcagguacaaggaagca	chr1:153527336-153527393	Biliosphere	ERR842903	2	1	0	1
JHU_ID_00467	JHU_ID_00467.5p		cccaggucccagguggagug	uucagggugagggcuuuuugu	cccaggucccagguggagugggggaggcacacucuuggagugugucccugcauucagggugagggcuuuuugu	chr1:153534023-153534096	Dendritic	SRR1708906	2	2	0	0						BX470102.3
JHU_ID_00468	JHU_ID_00468.3p	JHU_ID_00468.5p	ucaccccugcuuccucugccaga	ucggcaaggggagcaggaggaggacu	ucggcaaggggagcaggaggaggacugcggcggucaccccugcuuccucugccaga	chr1:153536278-153536334	Colon adenocarcinoma	SRR1917329	414	412	0	2	TJU_CMC_MD2.ID00203.3p-miR	Ago_1339
JHU_ID_00469	JHU_ID_00469.3p		agcugaauuaauugcugg	auaggugggaauaauuaagcucg	auaggugggaauaauuaagcucgaccuagagcugaauuaauugcugg	chr1:153551599-153551646	Tongue squamous carcinoma	SRR1810082	15	15	0	0
JHU_ID_00470	JHU_ID_00470.5p		gagcugugaagcugcccu	ggcagcuacucagcagcuugu	gagcugugaagcugcccugcuuacgaguagaccaugcagccugccaucuuugcucccuggcagcuacucagcagcuugu	chr1:15355507-15355586	Colon	SRR649562	6	6	0	0
JHU_ID_00471	JHU_ID_00471.3p		ucccuugggcugggcucug	gaggaaggggcccugggagg	gaggaaggggcccugggagggggcagcccucccuugggcugggcucug	chr1:153566514-153566562	Lung	SRR1608275	1	1	0	0						S100A2
JHU_ID_00473	JHU_ID_00473.3p		cagggcugggagggagugggac	gccacuaucuccccaccgagcc	gccacuaucuccccaccgagccagcucagcgggcagggcugggagggagugggac	chr1:153613069-153613124	Breast adenocarcinoma	SRR029054	14	14	0	0						S100A16
JHU_ID_00474	JHU_ID_00474.3p		ucccuggucuucugucucuagu	agaaggcagaugccagggacc	agaaggcagaugccagggaccugucuggcucccuggucuucugucucuagu	chr1:153613462-153613513	Colon adenocarcinoma	SRR1917324	13	13	0	0
JHU_ID_00475	JHU_ID_00475.5p/.3p		uuuuggggugcauggagcuucacu	gggagcugugugccuuccagcugcc	gggagcugugugccuuccagcugccuucugcccugggggcuuugcuaggcuccuggagaagcaggguuuuggggugcauggagcuucacu	chr1:153615408-153615498	Skin	SRR1259230	64	64	0	0						S100A14
JHU_ID_00476	JHU_ID_00476.3p		agcugcuguggccuggagg	ugcucugccugcgguggg	ugcucugccugcggugggggguguggggagggaagccuuccccaaccuguagcugcuguggccuggagg	chr1:153615548-153615617	Epithelium Keratinocyte (Neonatal)	SRR5127208	1	1	0	0						S100A14
JHU_ID_00477	JHU_ID_00477.3p		gcgcgaugucagccuccg	gaggcugcgccggcgu	gaggcugcgccggcgugcgcugaggcgcaugcgcgaugucagccuccg	chr1:153727740-153727788	Lung	SRR1216779	1	1	0	0
JHU_ID_00478	JHU_ID_00478.5p		cggacuggccuuuucuccguc	gggagaagagagccuggucugau	cggacuggccuuuucuccgucugccaaugguguugagggagaagagagccuggucugau	chr1:153727865-153727924	Dendritic	SRR1708916	5	5	0	0
JHU_ID_00479	JHU_ID_00479.5p	JHU_ID_00479.3p	ugaaauggaggggggugauuga	uguuucuccccucucuuuucc	ugaaauggaggggggugauugaugaaacuagcccucuguuucuccccucucuuuucc	chr1:153759467-153759524	Platelet	SRR1592246	4	3	0	1
JHU_ID_00480	JHU_ID_00480.3p		ggggcugcagccuggccuggcg	cccuggccgcggcugccgccgacc	cccuggccgcggcugccgccgacccggaaggucccgaggggggcugcagccuggccuggcg	chr1:153775646-153775707	Platelet	ERR747966	1	1	0	0						SLC27A3
JHU_ID_00481	JHU_ID_00481.5p	JHU_ID_00481.3p	cgccugacgccuuuccgcccccagc	gccgggcggaggcugccagggagua	gccgggcggaggcugccagggaguauguuggcuccaugcgccugacgccuuuccgcccccagc	chr1:153783683-153783746	Lung Adenocarcinoma	SRR1013979	183	176	0	7		Ago_1348
JHU_ID_00482	JHU_ID_00482.3p	JHU_ID_00482.5p	uuaccaugugacccagcaacu	aaugcugcagucacuguggaag	aaugcugcagucacuguggaagacaguuuggcgguuccucaaaauacuguuaccaugugacccagcaacu	chr1:153790728-153790798	Brain, Prefrontal Cortex	SRR1759217	2	1	0	1
JHU_ID_00483	JHU_ID_00483.5p		acuguugcccgggauggag	ccgccucugggugcaagug	acuguugcccgggauggagugcaguggcgugaucucagcucacugcaaccuccgccucugggugcaagug	chr1:153792432-153792502	Breast adenocarcinoma	SRR029054	1	1	0	0
JHU_ID_00484	JHU_ID_00484.3p		uuccuccaugcuauugccugcc	caggaggcaagaggcugg	caggaggcaagaggcugggucucacggcaccuuccuccaugcuauugccugcc	chr1:153799965-153800018	H9 Differentiated Midbrain	SRR1988302	6	6	0	0
JHU_ID_00485	JHU_ID_00485.3p	JHU_ID_00485.5p	cccugguccucucucugacaga	uucaggaagagggcugggcuu	uucaggaagagggcugggcuucaccuccaacccugguccucucucugacaga	chr1:153801902-153801954	Neuron iPSC	SRR1777169	23	22	0	1
JHU_ID_00486	JHU_ID_00486.3p		cccuuguucuuugcuuug	gauggcagggaacuggcu	gauggcagggaacuggcucuagcucauuucugcugcccuuguucuuugcuuug	chr1:153802322-153802375	Plasma	SRR822443	10	10	0	0
JHU_ID_00487	JHU_ID_00487.5p		uggguaggggagugggccgggcc	acuggcagcugcuccaaccccauc	uggguaggggagugggccgggcccagcacacugagacuggcagcugcuccaaccccauc	chr1:153806412-153806471	Myoblast Skeletal Muscle	SRR1055962	2	2	0	0						GATAD2B
JHU_ID_00489	JHU_ID_00489.3p		ucuagcaaggggcagcugcagaaa	ucugcaaugcugccuccuuugaggaag	ucugcaaugcugccuccuuugaggaagugucugacagccuccacuucuagcaaggggcagcugcagaaa	chr1:153852271-153852340	Macrophage	SRR1532975	22	22	0	0						GATAD2B
JHU_ID_00490	JHU_ID_00490.5p		ugccuggccggauuuuuuccuuuuu	aaaguagagacagggugaccagguaca	ugccuggccggauuuuuuccuuuuuuuaguaaaaaguagagacagggugaccagguaca	chr1:153870238-153870297	Embryonic lung fibroblast	SRR2960037	1	1	0	0						GATAD2B
JHU_ID_00491	JHU_ID_00491.3p		aaagauggagacuggcgaacg	uuggccaucucucauucuuuca	uuggccaucucucauucuuucaauucuaaagauggagacuggcgaacg	chr1:153923363-153923411	CD8+ T Cell (Neonatal)	SRR1853807	7	7	0	0
JHU_ID_00493	JHU_ID_00493.5p		aggaggggagcaagagggua	ccuuccuugcuucaucucucucc	aggaggggagcaagaggguacccugguugccauggcauccccagccuuccuugcuucaucucucucc	chr1:153944413-153944480	Embryonic lung fibroblast	SRR2960037	2	2	0	0						DENND4B
JHU_ID_00497	JHU_ID_00497.5p	JHU_ID_00497.3p	acugaugaugaacugccuuugcc	accaaggagacaugaacaguugaac	acugaugaugaacugccuuugccccgguuuuuguggcauugggccugaagaccaaggagacaugaacaguugaac	chr1:153969539-153969614	Breast ductal carcinoma	ERR372265	13	12	0	1						CREB3L4
JHU_ID_00498	JHU_ID_00498.5p		caugggaggcaagguaagggac	ccuuguccuaccucccuacau	caugggaggcaagguaagggacucagguugcugagccuuguccuaccucccuacau	chr1:153973134-153973190	Breast adenocarcinoma	ERR227915	7	7	0	0		Ago_1361				CREB3L4
JHU_ID_00499	JHU_ID_00499.3p		uuccuggccugggcuccgugccg	ucccggagccugggcggagaggg	ucccggagccugggcggagagggaggaaaacuucuuccuggccugggcuccgugccg	chr1:153986315-153986372	Cervical cancer	SRR1304304	27	27	0	0		Ago_1362				RAB13
JHU_ID_00500	JHU_ID_00500.5p	JHU_ID_00500.3p	uccggcccggcccggccccgccc	gccggggccgggggggcgccggggc	gccggggccgggggggcgccggggccggggggcggcgcuccggcccggcccggccccgccc	chr1:1540347-1540408	Biliosphere	ERR842911	72	63	0	9		Ago_57				TMEM240
JHU_ID_00501	JHU_ID_00501.5p		cggggcagcggcggcggcggc	cgaggcggccgaggcgcuggg	cggggcagcggcggcggcggcgggggcacccgacgaggcggccgaggcgcuggg	chr1:15410064-15410118	Epithelium Colonic Epithelium (flow)	SRR5127219	1	1	0	0						EFHD2
JHU_ID_00502	JHU_ID_00502.5p		ucucucccuagccccuccacag	guggggggacagggggaugag	ucucucccuagccccuccacagagacauuaagauuguuuuuguggggggacagggggaugag	chr1:15411366-15411428	Lung	SRR1608275	1	1	0	0						EFHD2
JHU_ID_00503	JHU_ID_00503.5p		acaguucugagacccuuggagu	uccucagggugucaguauugcuu	acaguucugagacccuuggaguggagcugacgacacacuccucagggugucaguauugcuu	chr1:154173219-154173280	Epithelium Bronchial	SRR5127216	4	4	0	0
JHU_ID_00504	JHU_ID_00504.5p		uggagggugggagaacuuugcu	cuugagguuuccugcccaagggg	uggagggugggagaacuuugcucuggcuugagguuuccugcccaagggg	chr1:154182593-154182642	Coronary Endothelial Cell	SRR5127228	3	3	0	0
JHU_ID_00506	JHU_ID_00506.5p		gcuggcggugaggguuggucggcc	ucugagcccuggccgccagguc	gcuggcggugaggguuggucggccccgcugugcaugugugggucugagcccuggccgccagguc	chr1:1542444-1542508	Colon adenocarcinoma	SRR1917323	2	2	0	0						SSU72
JHU_ID_00507	JHU_ID_00507.5p	JHU_ID_00507.3p	aacccaggagucggauguugaagu	ugcauuccagccugggugac	aacccaggagucggauguugaagugggcugagauugcaccauugcauuccagccugggugac	chr1:154250767-154250829	Lung cancer	SRR1013984	45	43	0	2		Ago_1367				UBAP2L
JHU_ID_00508	JHU_ID_00508.5p		uucugggugcgugucaguagaccu	ggagacagcaugugccagaggugau	uucugggugcgugucaguagaccucaccuugcuaaguccuggcauggugagggagacagcaugugccagaggugau	chr1:154254377-154254453	Colon adenocarcinoma	SRR1917336	4	4	0	0		Ago_1368				UBAP2L
JHU_ID_00509	JHU_ID_00509.5p/.3p		gggcauacccguagaccuugucug	ggcaggggggacaguguaugcaaga	gggcauacccguagaccuugucugacugugcucauggccaggcaggggggacaguguaugcaaga	chr1:154259727-154259792	Colon adenocarcinoma	SRR1917331	83	83	0	0
JHU_ID_00510	JHU_ID_00510.3p		uagcccuguuggacccuugcaug	agcaaggugagagcccagcagggcaga	agcaaggugagagcccagcagggcagagccaguugcaacugacaguagcccuguuggacccuugcaug	chr1:154344249-154344317	Lung Adenocarcinoma	SRR1304309	3	3	0	0						ATP8B2
JHU_ID_00511	JHU_ID_00511.5p		agaggacaagcaugaggguuc	accugcuugccuuguccuuccc	agaggacaagcaugaggguucucuggaagcuccaucuggaccugcuugccuuguccuuccc	chr1:154551501-154551562	Lung cancer	SRR1013983	21	21	0	0		Ago_1373				UBE2Q1
JHU_ID_00512	JHU_ID_00512.5p		aagcacagccaaagacag	gucuacuuuuggugccuuuuuu	aagcacagccaaagacaguuaagacgucuacuuuuggugccuuuuuu	chr1:154590153-154590200	Cervical cancer	SRR1532966	4	4	0	0						ADAR
JHU_ID_00513	JHU_ID_00513.5p/.3p		cuccucugcacagauggguaggc	cugccuguugaaggugguggu	cugccuguugaagguggugguucuaauuuuauaaaccuccucugcacagauggguaggc	chr1:154599846-154599905	Retina	ERR973618	8	8	0	0		Ago_1377				ADAR
JHU_ID_00514	JHU_ID_00514.5p		ucccuccagaggcuguaggggaga	ucucccaaccucuggugggugcuggc	ucccuccagaggcuguaggggagaauccauuccuugccucucccaaccucuggugggugcuggc	chr1:154615051-154615115	Prostate adenocarcinoma	SRR1810079	2	2	0	0
JHU_ID_00515	JHU_ID_00515.5p		uccgggcuguagugcagugg	acugcaaccucugccuccuggguu	uccgggcuguagugcaguggcgcaaucuuggcucacugcaaccucugccuccuggguu	chr1:154761387-154761445	Brain, Prefrontal Cortex	ERR409878	2	2	0	0						KCNN3
JHU_ID_00516	JHU_ID_00516.5p		uacugaucucugguuuguggcu	ucacaggucaguggucauagc	uacugaucucugguuuguggcugugccugauguagucacaggucaguggucauagc	chr1:154809020-154809076	Biliosphere	ERR842903	27	27	0	0						KCNN3
JHU_ID_00518	JHU_ID_00518.5p		cagguuggccugggaucagggug	ucuugaugccuccucucuggg	cagguuggccugggaucagggugagauuguggacuggcccaaggucaguucuugaugccuccucucuggg	chr1:154862637-154862707	Brain, Prefrontal Cortex	ERR409893	2	2	0	0						KCNN3
JHU_ID_00519	JHU_ID_00519.5p		cugaggggggaaaaaaaa	uuguuugcccccaucccaa	cugaggggggaaaaaaaauccugcacuccauguccucccacuagcauuguuugcccccaucccaa	chr1:154929542-154929607	Breast adenocarcinoma	SRR873382	660	660	0	0						PMVK
JHU_ID_00521	JHU_ID_00521.5p/.3p		ggagcaggggguagggcuau	agcccccaccccgccccaa	agcccccaccccgccccaaccucgaacuggagcaggggguagggcuau	chr1:154970862-154970910	Myoblast Skeletal Muscle	SRR1200890	4	4	0	0						SHC1
JHU_ID_00522	JHU_ID_00522.5p	JHU_ID_00522.3p	gccgaggaucguugcuaggaggc	cucguaguagggcuugga	gccgaggaucguugcuaggaggcggaguuucggagaauggaaggaguaacgaaggguuucucguaguagggcuugga	chr1:154973938-154974015	Dendritic	SRR1708914	3	2	0	1						SHC1
JHU_ID_00523	JHU_ID_00523.5p		cgucugggucgugcaggccuggu	aagggcugugcuaggggcuaggcggc	cgucugggucgugcaggccuggugaagggcugugcuaggggcuaggcggc	chr1:155000735-155000785	Lung Adenocarcinoma	SRR1013980	15	15	0	0
JHU_ID_00524	JHU_ID_00524.5p	JHU_ID_00524.3p	uggggagggacgcagggcgcccgc	gggcgcccuucccuccccgcg	gggcgcccuucccuccccgcggggcaccgucacgcguggggagggacgcagggcgcccgc	chr1:155001768-155001828	Hodgkin lymphoma	SRR1535276	140	136	0	4	TJU_CMC_MD2.ID00208.5p-miR	Ago_1389
JHU_ID_00525	JHU_ID_00525.3p		aggggcuucuguagggucag	cccccuacaggggcucccucu	cccccuacaggggcucccucuccuucaagaggggcuucuguagggucag	chr1:155002030-155002079	Cervical cancer	SRR1304304	9	9	0	0
JHU_ID_00530	JHU_ID_00530.5p		ugcccacagugcccgcccauccc	gguggcgggcagagugggcagc	ugcccacagugcccgcccaucccuugaccuaugaggaggaggagguggcgggcagagugggcagc	chr1:155015328-155015393	Dendritic	SRR1708913	3	3	0	0	TJU_CMC_MD2.ID00210.5p-miR					ZBTB7B
JHU_ID_00531	JHU_ID_00531.3p		ucccuccccggggccagagggcagg	uccccacggcccugggcagggaau	uccccacggcccugggcagggaaugucuuguucccgccgcucccuccccggggccagagggcagg	chr1:155017416-155017481	Retina	ERR973615	1	1	0	0						ZBTB7B
JHU_ID_00532	JHU_ID_00532.3p		cuuccuugccacccuccccagc	ugcaggauggagagagggu	ugcaggauggagagaggguguggggcagggggcagggagaggcccccagccccaaccuuccuugccacccuccccagc	chr1:155057111-155057189	Dendritic	SRR1708910	88	88	0	0	TJU_CMC_MD2.ID00211.3p-miR	Ago_1393				ADAM15
JHU_ID_00533	JHU_ID_00533.5p		cgguucggcccggcuaccug	cguggcggaggcuggagccccc	cgguucggcccggcuaccugggguuacuggaguuccaguagacuacguggcggaggcuggagccccc	chr1:155063886-155063953	Dendritic	SRR1708914	1	1	0	0						RP11-540D14.8
JHU_ID_00534	JHU_ID_00534.5p		ggugguggcggugguggcggg	cgcugacaccucugcgccccu	ggugguggcggugguggcgggaacgcuggggggcggcgguugcacgcugacaccucugcgccccu	chr1:155082080-155082145	Thyroid	SRR1291267	12	12	0	0						EFNA3
JHU_ID_00536	JHU_ID_00536.3p		cucggaccgggcggagaggaguaa	gcuccucccgcccucuagug	gcuccucccgcccucuaguggucaccgggagccuugcggggcugggccgcgcaagcugaggggccgcucggaccgggcggagaggaguaa	chr1:155193636-155193726	Lung	SRR1608281	1	1	0	0
JHU_ID_00537	JHU_ID_00537.3p	JHU_ID_00537.5p	acuccuccccauccuucuccagg	cugggguaggguggcagaugu	cugggguaggguggcagaugucaagugcugacuccuccccauccuucuccagg	chr1:155203136-155203189	Neuron iPSC	SRR1777169	6	5	0	1		Ago_1400				THBS3
JHU_ID_00538	JHU_ID_00538.5p	JHU_ID_00538.3p	gaggucugggcacacucacc	ucuguguguucccgaacccucccc	ucuguguguucccgaacccuccccggcuggccauggaugcugggaggucugggcacacucacc	chr1:155212218-155212281	Dendritic	SRR1708916	8	4	0	4						RP11-263K19.6
JHU_ID_00539	JHU_ID_00539.3p		gcacgggugguggggcug	gccccgccuccccagggcug	gccccgccuccccagggcugcuuuucucgcggcacgggugguggggcug	chr1:155227503-155227552	Dendritic	SRR1708906	26	26	0	0
JHU_ID_00540	JHU_ID_00540.3p		gaggucugggcacacucacc	ucuguguguucccguccccuccc	ucuguguguucccguccccuccccggcuggccauggaugcugggaggucugggcacacucacc	chr1:155232844-155232907	Dendritic	SRR1708916	2	2	0	0		Ago_1401
JHU_ID_00541	JHU_ID_00541.3p		ccugggaggcugagcgaga	agaaucaguugaacccgggag	agaaucaguugaacccgggagauggugguugcggugagccgagaucgcgccacugcacuccagccugggaggcugagcgaga	chr1:155236891-155236973	Embryonic lung fibroblast	SRR2960037	2	2	0	0
JHU_ID_00542	JHU_ID_00542.3p		auccucugagcuucggugggc	gcacuggacguucccuaaccug	gcacuggacguucccuaaccugaggcucucuaaagaggaagguuaggaauccucugagcuucggugggc	chr1:155244964-155245033	Dendritic	SRR1708907	2	2	0	0
JHU_ID_00543	JHU_ID_00543.5p/.3p		cgugguggggaggggagcgggac	cccauucccaucccccuucucu	cccauucccaucccccuucucuaguccccgaccugcggcagccggagcucggggagcggagcgugguggggaggggagcgggac	chr1:155255402-155255486	BrainPrefrontalCortex	SRR1759213	3	3	0	0		Ago_1404				FAM189B
JHU_ID_00544	JHU_ID_00544.3p		cuccuccucggacuccucag	gaggaggacaagcagggagggguu	gaggaggacaagcagggagggguuccuguccacagcagcuccuccucggacuccucag	chr1:155283916-155283974	Retina	ERR973612	3	3	0	0						HCN3
JHU_ID_00545	JHU_ID_00545.5p		auagagcuccagaccccagcccag	ggggaggggcuggagcucuguga	auagagcuccagaccccagcccagagauucucacugaguaggccuggggaggggcuggagcucuguga	chr1:155286061-155286129	Hepatocellular carcinoma (HepG2)	ERR738417	3	3	0	0						HCN3
JHU_ID_00546	JHU_ID_00546.3p		cugcgccugcgcccccacc	gaggagccaggagcagag	gaggagccaggagcagagacccagcugcgccugcgcccccacc	chr1:155323469-155323512	Plasma	SRR822446	1	1	0	0						RUSC1
JHU_ID_00547	JHU_ID_00547.3p		ggaacuuggugcagaagg	aucucgcauuucgg	aucucgcauuucggggccgcccggaacuuggugcagaagg	chr1:155325140-155325180	Monocytic leukemia	DRR000555	11	11	0	0						RUSC1
JHU_ID_00550	JHU_ID_00550.3p		ugcuguggagcuggucgcaggcg	ccugagccuacuucgcaguagc	ccugagccuacuucgcaguagcaggaccgcugcuguggagcuggucgcaggcg	chr1:155563232-155563285	T cell leukemia	SRR1292458	12	12	0	0						ASH1L-AS1
JHU_ID_00551	JHU_ID_00551.5p		cguggcccaguccggcuucucu	aggggcggggcuccacgggccacgcc	cguggcccaguccggcuucucugugguugccugugaggggcggggcuccacgggccacgcc	chr1:155610016-155610077	Colon adenocarcinoma	SRR1264358	1	1	0	0						RP11-29H23.4
JHU_ID_00552	JHU_ID_00552.5p		cguggcccaguccggcuucucu	agaggcggggcuccacgggccacgcc	cguggcccaguccggcuucucugugguugccgcgagaggcggggcuccacgggccacgcc	chr1:155745598-155745658	Colon adenocarcinoma	SRR1264358	1	1	0	0
JHU_ID_00553	JHU_ID_00553.5p/.3p		ggcccaggugguugagacugca	ugguccuagguacuuugggagucuga	ugguccuagguacuuugggagucugaggugggaggaucacuugggcccaggugguugagacugca	chr1:155761256-155761321	Retina	ERR973605	4	4	0	0		Ago_1412				GON4L
JHU_ID_00554	JHU_ID_00554.3p	JHU_ID_00554.5p	cugugccuggccugguauuuucu	aaagugcugggauuacaggcaug	aaagugcugggauuacaggcaugaaccacugugccuggccugguauuuucu	chr1:155906467-155906518	Brain, Prefrontal Cortex	ERR409888	3	2	0	1						RIT1
JHU_ID_00555	JHU_ID_00555.5p		uugcccaggcagugacugugc	acagucucuuccucccaggcucag	uugcccaggcagugacugugcaguggcacagucucuuccucccaggcucag	chr1:155931492-155931543	Smooth Muscle Cell, Coronary	SRR5127211	2	2	0	0
JHU_ID_00557	JHU_ID_00557.5p		ccagcccuccaccucuggcagu	uggcaguggaagccggaggagcagug	ccagcccuccaccucuggcagugccucuucagaugcuggcaguggaagccggaggagcagug	chr1:156051169-156051231	Blood	SRR2201549	1	1	0	0						UBQLN4
JHU_ID_00559	JHU_ID_00559.3p		ucugagcagcagggucua	gacccuugcaccucugagc	gacccuugcaccucugagcucacucccaguuuugccuaugagguggguaagacucuguucugagcagcagggucua	chr1:156058695-156058771	Breast adenocarcinoma	SRR960732	2	2	0	0
JHU_ID_00560	JHU_ID_00560.5p		ucccccaccacuuuccccugcc	caggggcaagugaggagggggaau	ucccccaccacuuuccccugcccugucgcaggggcaagugaggagggggaau	chr1:156073814-156073866	Fibroblast Lung	SRR1988283	3	3	0	0		Ago_1423				MEX3A
JHU_ID_00561	JHU_ID_00561.3p		cccccagcccaggccuug	ugaccuggugcuggggaccgga	ugaccuggugcuggggaccggaugccuuguggcuccuucucacugcugagcaugcauucccccagcccaggccuug	chr1:156097296-156097372	Lung	SRR1608275	1	1	0	0						LMNA
JHU_ID_00562	JHU_ID_00562.3p		aucugcaggagauuuccug	ggaggucaacuaggaaag	ggaggucaacuaggaaagugaacucccagccaggagggugguggugaaucugcaggagauuuccug	chr1:156105467-156105533	Platelet	SRR1592244	1	1	0	0						LMNA
JHU_ID_00563	JHU_ID_00563.5p		aaaguggggggagggcugag	cacccuucuuccaccacug	aaaguggggggagggcugaggcuggugcccaucagugugacucacccuucuuccaccacug	chr1:156114268-156114329	Skin	SRR2174541	1	1	0	0						LMNA
JHU_ID_00564	JHU_ID_00564.5p/.3p		aagggcugugggagcugcgg	gccucccucccucccuugc	gccucccucccucccuugcauuccugggccaagcaggccaagggcugugggagcugcgg	chr1:156115991-156116050	Lung	SRR1608278	6	6	0	0						LMNA
JHU_ID_00565	JHU_ID_00565.5p		uccuggacaaugggcggc	cgcccccugcaaggucu	uccuggacaaugggcggcuggcuuccucaccagccgcccccugcaaggucu	chr1:156123728-156123779	Fibroblast strain	SRR020286	2	2	0	0						LMNA
JHU_ID_00566	JHU_ID_00566.3p		agggacuaggagaggugaccag	uuuccuuccccacagucccaca	uuuccuuccccacagucccacauguguaaaagggacuaggagaggugaccag	chr1:156130075-156130127	Thyroid	SRR1291268	10	10	0	0						LMNA
JHU_ID_00567	JHU_ID_00567.3p		ucuggggaaaaggaggacuggagu	ucccaguuuggcccuccgguau	ucccaguuuggcccuccgguauacaagggccuccuauaggcccuugugauuucucuggggaaaaggaggacuggagu	chr1:156131674-156131751	Platelet	SRR1592249	3	3	0	0						LMNA
JHU_ID_00568	JHU_ID_00568.5p/.3p		gugggcuggggagacgucggggag	ggacauggagauccacgccuaccg	ggacauggagauccacgccuaccgcaagcucuuggagggcgaggaggagaggugggcuggggagacgucggggag	chr1:156136071-156136146	BladderEpithelium	DRR013036	19	19	0	0		Ago_1432				LMNA
JHU_ID_00569	JHU_ID_00569.3p		cagacuggagggcaggggc	uccugccccucuugucugag	uccugccccucuugucugagccccagacuggagggcaggggc	chr1:156138923-156138965	Bladder	SRR333666	1	1	0	0						LMNA
JHU_ID_00570	JHU_ID_00570.5p		aggaaggggucccugcuugg	aagaaggaaacccuuccucu	aggaaggggucccugcuuggguuggcaguuuccaagaaggaaacccuuccucu	chr1:156141200-156141253	Thyroid	SRR1658404	1	1	0	0
JHU_ID_00571	JHU_ID_00571.3p	JHU_ID_00571.5p	cagccucugcagcuccccggccc	cccggggagcugccugggcaggg	cccggggagcugccugggcagggguggcuggccggcucccagccucugcagcuccccggccc	chr1:156153848-156153910	Macrophage	SRR1532975	12	11	0	1	TJU_CMC_MD2.ID00216.3p-miR	Ago_1435				SEMA4A
JHU_ID_00572	JHU_ID_00572.5p	JHU_ID_00572.3p	uggcuguaacaagaaauuuaag	uaaauuucuuguuucagccau	uggcuguaacaagaaauuuaagucaauuaaagggggugucagguaucccuuugacuuaaauuucuuguuucagccau	chr1:15619912-15619989	Lung	SRR372642	59	54	0	5		Ago_299				DDI2
JHU_ID_00573	JHU_ID_00573.5p/.3p		cgcuguccucuggcgaccugu	aggaauagagagcagcuga	aggaauagagagcagcugacacgcuguccucuggcgaccugu	chr1:156216426-156216468	Skin	SRR1259226	28	28	0	0						PMF1
JHU_ID_00574	JHU_ID_00574.5p	JHU_ID_00574.3p	uuccccggaguggggaguuggcc	uccgcucccggggggcucu	uuccccggaguggggaguuggccagggccgaucgacucgcuggccggccggcccgccuccgcucccggggggcucu	chr1:156216790-156216866	Lung cancer	SRR1013983	171	163	0	8	TJU_CMC_MD2.ID00217.5p-miR	Ago_1439				PMF1
JHU_ID_00577	JHU_ID_00577.5p		uccugggcggcggcggcgg	gcggcggaccggcugggagu	uccugggcggcggcggcgggcgcacgggccggggcgcgcggggcggcgcggcggaccggcugggagu	chr1:156388520-156388587	Osteoblast	SRR5127233	12	12	0	0						RP11-139I14.2
JHU_ID_00578	JHU_ID_00578.3p		gggagggcuguguugagaggguag	uuccaucuccugcacagugcuccugc	uuccaucuccugcacagugcuccugcuccagggagggcuguguugagaggguag	chr1:156409163-156409217	BrainCerebellum	SRR553573	4	4	0	0						C1orf61
JHU_ID_00580	JHU_ID_00580.3p		uccacagcuauggcugggug	uccagcgggagcuggugaaca	uccagcgggagcuggugaacacuuucccacaggcuguccacagcuauggcugggug	chr1:156419891-156419947	Embryonic kidney	SRR515902	1	1	0	0						C1orf61
JHU_ID_00583	JHU_ID_00583.5p		ccuggggggcugucgcuaggcaa	gccgcagcagccacagccuccacagcag	ccuggggggcugucgcuaggcaaugucacugccuggcaacagccacagcagccccagcagccgcagcagccacagccuccacagcag	chr1:156468883-156468970	T cell leukemia	SRR1292461	2	2	0	0						MEF2D
JHU_ID_00588	JHU_ID_00588.3p		agggggccugggagggcggcggg	cgccgccuguucccuccuccuug	cgccgccuguucccuccuccuuggcccgaaauggugcagaagggggccugggagggcggcggg	chr1:156499998-156500061	Myoblast Skeletal Muscle	SRR1200834	1	1	0	0						MEF2D
JHU_ID_00589	JHU_ID_00589.5p		ucagggggacggucuagac	cuccaccccaaccccuggac	ucagggggacggucuagaccacccuccaccccaaccccuggac	chr1:156500388-156500431	Skin	SRR2174517	5	5	0	0						MEF2D
JHU_ID_00591	JHU_ID_00591.5p	JHU_ID_00591.3p	ugccuccucccuuccucccagu	ucgggcaggggcuggugaggaggccuc	ucgggcaggggcuggugaggaggccucugaugaggcauggcuaauccugaugccuccucccuuccucccagu	chr1:156540915-156540987	H9 Differentiated Forebrain	SRR1988293	28	27	0	1		Ago_1450				IQGAP3
JHU_ID_00592	JHU_ID_00592.5p		ucccaggagcucucugugucccu	ggaggggaccagggguuccuggauuagg	ucccaggagcucucugugucccuguguaggacagggaggggaccagggguuccuggauuagg	chr1:156667917-156667979	Myoblast Skeletal Muscle	SRR5127218	73	73	0	0		Ago_1453
JHU_ID_00593	JHU_ID_00593.3p		gacugccucucgccugcccug	cagcgggcaggaggcagguugg	cagcgggcaggaggcagguugguucacagaagggaccccagccccuccacugacugccucucgccugcccug	chr1:156675343-156675415	H9 Differentiated Mesenchymal	SRR1988295	2	2	0	0						NES
JHU_ID_00594	JHU_ID_00594.3p	JHU_ID_00594.5p	uggggagggugugagagaggug	ccccccaacacacccaccccaag	ccccccaacacacccaccccaagcaagucacaaaucagccugcuccaacugucuuauggggagggugugagagaggug	chr1:156701095-156701173	Breast adenocarcinoma	SRR873383	76	73	0	3		Ago_1455				CRABP2
JHU_ID_00595	JHU_ID_00595.5p		ucccagggugcucugugccag	ggggcagggcauacugggaaa	ucccagggugcucugugccaguuaagauuuuuaacuuucaaggggcagggcauacugggaaa	chr1:156723018-156723080	Lung Adenocarcinoma	SRR1304309	3	3	0	0						ISG20L2
JHU_ID_00596	JHU_ID_00596.5p		cucucuucccacacuucuuccag	ugaagauacucacagggaagauagug	cucucuucccacacuucuuccagaucuugaagauacucacagggaagauagug	chr1:156724318-156724371	Skin	SRR1259230	22	22	0	0		Ago_1458				ISG20L2
JHU_ID_00597	JHU_ID_00597.3p		cucaccucuucuauccaccagg	uggaggguggcaggaagcc	uggaggguggcaggaagccuggcucguaggccaggcucaccucuucuauccaccagg	chr1:156737775-156737832	Brain, Prefrontal Cortex	ERR409893	4	4	0	0		Ago_1459				MRPL24
JHU_ID_00598	JHU_ID_00598.3p		uuccucuguugauccugccuag	gggaaggagccccggaggagaggagu	gggaaggagccccggaggagaggaguggguggcugguggccucccucuccagccucagcccacuuccucuguugauccugccuag	chr1:156743878-156743963	Neuron iPSC	SRR1777161	14	14	0	0						HDGF
JHU_ID_00599	JHU_ID_00599.5p		ccugcagucuggcaccug	auuaccgcugcagggg	ccugcagucuggcaccuggguccccggcugugcuggaaaccacagcuagggcuggauuaccgcugcagggg	chr1:156747324-156747395	Neuron iPSC	SRR1777161	2	2	0	0						HDGF
JHU_ID_00600	JHU_ID_00600.3p		cuaggccuuucuucuguggaucu	aucccaggagacaggcauagga	aucccaggagacaggcauaggacaauaauagcaaacgccuuuccuaggccuuucuucuguggaucu	chr1:156747558-156747624	Colon adenocarcinoma	SRR1917330	7	7	0	0		Ago_1460				HDGF
JHU_ID_00601	JHU_ID_00601.5p	JHU_ID_00601.3p	cacugacucguccaucucauag	cugagauggaugagaaguaagag	cugagauggaugagaaguaagagggaaccucacugacucguccaucucauag	chr1:156749264-156749316	Colon adenocarcinoma	SRR1917325	76	75	0	1		Ago_1461				HDGF
JHU_ID_00603	JHU_ID_00603.3p		uggccucaccuucucucccag	gggaguuaggcuggggcuuua	gggaguuaggcuggggcuuuaacccugccucccucaccccacuccucccuggccucaccuucucucccag	chr1:156809490-156809560	CD3+ T Cell Splenic	SRR5127200	3	3	0	0						SH2D2A
JHU_ID_00604	JHU_ID_00604.3p		uccccaguacccccacca	guugggggugaugggggac	guugggggugaugggggaccaggagcuucugccucaucccaucagccucccucccuccccaguacccccacca	chr1:156887614-156887687	Colon adenocarcinoma	SRR1917329	40337	40337	0	0		Ago_1464
JHU_ID_00605	JHU_ID_00605.5p	JHU_ID_00605.3p	auccugcccgagcugagcccu	ggccagcuuaggccaggguug	ggccagcuuaggccaggguugagagcugacacccggcccaauccugcccgagcugagcccu	chr1:156894820-156894881	Red Blood Cell	SRR1664895	239	235	0	4						PEAR1
JHU_ID_00606	JHU_ID_00606.5p		ucuccucugaggagccuugggagc	ucccaggacucaugggggacc	ucuccucugaggagccuugggagccuugagaaagaggccucccaggacucaugggggacc	chr1:156895397-156895457	Plasma	SRR822447	1	1	0	0						PEAR1
JHU_ID_00607	JHU_ID_00607.3p		cgggcugccuuucccugcaggagu	uucuggggauuuccccauggcggcuugau	uucuggggauuuccccauggcggcuugauuuccgggcugccuuucccugcaggagu	chr1:157034364-157034420	BladderEpithelium	DRR013038	1	1	0	0
JHU_ID_00608	JHU_ID_00608.3p		gcagcagggacaggagagcag	gcuuuucccggcccuggugccu	gcuuuucccggcccuggugccugagcacaaccgaaaaaucagcagcagggacaggagagcag	chr1:15703877-15703939	Bladderepithelium	DRR013035	5	5	0	0
JHU_ID_00609	JHU_ID_00609.5p		agggguugcaggacgggcca	uccugucuggccaccccgca	agggguugcaggacgggccagauccugucuggccaccccgca	chr1:15757646-15757688	Neuron iPSC	SRR1777169	2	2	0	0						FBLIM1
JHU_ID_00611	JHU_ID_00611.3p		gggagaggcuggggccgcg	cggccccuaccccucaccuc	cggccccuaccccucaccucccacccaagccugaggaccccggggagaggcuggggccgcg	chr1:15759430-15759491	B Cell Centroblast	SRR060981	36	36	0	0						FBLIM1
JHU_ID_00612	JHU_ID_00612.3p		cugcccagcugugaacaucu	gcagucacugcuugggaggua	gcagucacugcuugggagguauaggggcugcccagcugugaacaucu	chr1:15761003-15761050	Smooth Muscle Cell, Coronary	SRR5127211	2	2	0	0						FBLIM1
JHU_ID_00613	JHU_ID_00613.5p	JHU_ID_00613.3p	caggcacggggacucacgccu	ucaggaguuugagaucagc	caggcacggggacucacgccugugaucuuagcacuuugggaggcugaggugggcggaucaugaggucaggaguuugagaucagc	chr1:157736115-157736199	Skin	SRR2174513	8	6	0	2
JHU_ID_00614	JHU_ID_00614.5p		gggcugagggaaccaagggucc	ggaguugguucuugccucc	gggcugagggaaccaaggguccagacugcagcagggacuggggucugugggaguugguucuugccucc	chr1:157994582-157994650	Skin	SRR2174509	3	3	0	0						KIRREL
JHU_ID_00615	JHU_ID_00615.5p		uagggacucacuguguugcuc	gcucaagugauucucccgccu	uagggacucacuguguugcucaggcuggucuugcacuccugggcucaagugauucucccgccu	chr1:15801985-15802048	Lung Adenocarcinoma	SRR1304309	13	12	1	0
JHU_ID_00616	JHU_ID_00616.5p	JHU_ID_00616.3p	cuggggaggccaggugucauggau	cuguguugccuccuccccuaggu	cuggggaggccaggugucauggauguaguugagagggucugaggccugaucccaccucuguguugccuccuccccuaggu	chr1:158087928-158088008	Lung Adenocarcinoma	SRR1013979	12	9	0	3
JHU_ID_00617	JHU_ID_00617.5p		gggugcuguaggcucuuu	aaagcuguagggauuccccc	gggugcuguaggcucuuuuucaaagaaaacaaaaaacaaugaaaaccucauuugggaagaaaagcuguagggauuccccc	chr1:158096028-158096108	Brain, Prefrontal Cortex	SRR1759218	34	34	0	0
JHU_ID_00619	JHU_ID_00619.5p	JHU_ID_00619.3p	agcccaggaggcaaaguuugca	ugaauggcugaguugggagca	ugaauggcugaguugggagcaucacuugagcccaggaggcaaaguuugca	chr1:15812780-15812830	Adrenal	SRR944034	115	114	0	1		Ago_303
JHU_ID_00620	JHU_ID_00620.3p		ugcggccgcaguggaggcuggag	cuagcaguggcggcggcugcaga	cuagcaguggcggcggcugcagaagcccaagcagcugcggccgcaguggaggcuggag	chr1:158177792-158177850	Platelet	SRR1592244	1	1	0	0
JHU_ID_00621	JHU_ID_00621.5p		aggcccuggcggaaggau	cuugacgucaggacuuc	aggcccuggcggaaggaucucuugacgucaggacuuc	chr1:15836827-15836864	Dendritic	SRR1708922	2	2	0	0						FLJ37453
JHU_ID_00622	JHU_ID_00622.5p		cgggggcucuuagaggcca	gacccuauggcucucgga	cgggggcucuuagaggccagcguggacgccgcaaucgcggggugagccgcgcgacgacccuauggcucucgga	chr1:15837435-15837508	Lung	SRR372624	1	1	0	0						FLJ37453
JHU_ID_00625	JHU_ID_00625.5p		uucaggaagaucaaggac	cucuugacuugaaucugaaaga	uucaggaagaucaaggacagcuucccccaggaagugucucuugacuugaaucugaaaga	chr1:159134955-159135014	T cell leukemia	SRR1292458	5	5	0	0
JHU_ID_00627	JHU_ID_00627.3p		ccccccugaccccucccugggc	ugugggaggggcaggugagggggcc	ugugggaggggcaggugagggggcccggggccgagcucugugggguggccccccugaccccucccugggc	chr1:15943899-15943969	Platelet	SRR1592244	1	1	0	0						ZBTB17
JHU_ID_00628	JHU_ID_00628.5p		acagaugggccaucucuguucu	cucagagaggcccaucuuca	acagaugggccaucucuguucuuuggaugaggugggcaaagcucagagaggcccaucuuca	chr1:159782624-159782685	Skin	SRR1259230	17	17	0	0
JHU_ID_00629	JHU_ID_00629.3p		gcuucagauuuaauuggguucu	agagauugaggagaaagcag	agagauugaggagaaagcaguaacauugugguuccacuaaacuacagugcaggcuucagauuuaauuggguucu	chr1:159864296-159864370	Skin	SRR2174525	4	4	0	0						RP11-190A12.7
JHU_ID_00630	JHU_ID_00630.3p		caggcggggugggguggcugagu	ccaggcacacacaccaucagcuuggg	ccaggcacacacaccaucagcuuggggaaggcaggcggggugggguggcugagu	chr1:159922418-159922472	Platelet	SRR1592249	3	3	0	0						TAGLN2
JHU_ID_00631	JHU_ID_00631.3p		ugggcugcggaaagggggcu	ucccuggaaacagcccuga	ucccuggaaacagcccugagcacagccacucccaggagagaggucuggaacugggcugcggaaagggggcu	chr1:159922610-159922681	Corona Radiata	ERR457736	3	3	0	0						TAGLN2
JHU_ID_00632	JHU_ID_00632.3p		ucagcagcuguuucucuucccca	ggguccugagaaggggcaguuccaacc	ggguccugagaaggggcaguuccaaccaggccaggccuggucagcagcuguuucucuucccca	chr1:159923001-159923064	Blood	SRR2201551	2	2	0	0						TAGLN2
JHU_ID_00633	JHU_ID_00633.3p		cucccagccgccgccccccac	ggggggaggcggcaguccacc	ggggggaggcggcaguccaccuccgguccugcagguccggccucccagccgccgccccccac	chr1:159924543-159924605	Platelet	SRR1592247	1	1	0	0						TAGLN2
JHU_ID_00634	JHU_ID_00634.5p/.3p		gaaagccggugguggccgcgggc	cgcugcccccaccgggugcccc	cgcugcccccaccgggugcccccugcugcugggaaagccggugguggccgcgggc	chr1:159924699-159924754	Lung Adenocarcinoma	SRR1304309	18	18	0	0		Ago_1482				TAGLN2
JHU_ID_00636	JHU_ID_00636.5p	JHU_ID_00636.3p	uccccaggacucuguugcauu	cguagcagaguccuggggaga	uccccaggacucuguugcauuuaaggcagagggaacaacguagcagaguccuggggaga	chr1:160071007-160071066	Lung cancer	SRR1013983	82	81	0	1						RP11-536C5.2
JHU_ID_00637	JHU_ID_00637.3p		ucagagagcuccucagagg	ucuggaccucucucagagc	ucuggaccucucucagagcagauugcagcucagagagcuccucagagg	chr1:160082826-160082874	Brain, Prefrontal Cortex	ERR409898	2	2	0	0						KCNJ9
JHU_ID_00638	JHU_ID_00638.3p		gcgaaggguuugagcugaaggg	cucgcugcaaacccugcugaa	cucgcugcaaacccugcugaaguagggguuggcggaagccaggaguuccugaaugcgaaggguuugagcugaaggg	chr1:160099317-160099393	CD3+ T Cell Splenic	SRR5127200	2	2	0	0
JHU_ID_00641	JHU_ID_00641.5p	JHU_ID_00641.3p	ugagaggcgaggagccaggcuug	aaguguggccgucuucccuccag	ugagaggcgaggagccaggcuugggaagggguuucguccucaaguguggccgucuucccuccag	chr1:160135370-160135434	Brain, Prefrontal Cortex	ERR409900	14	9	0	5						ATP1A2
JHU_ID_00642	JHU_ID_00642.3p		accuucugguccuacccuuuccu	cuagggguggaucaggagaaac	cuagggguggaucaggagaaaccaugcuaccuucugguccuacccuuuccu	chr1:160136812-160136863	Brain, Prefrontal Cortex	ERR409882	2	2	0	0						ATP1A2
JHU_ID_00643	JHU_ID_00643.5p		aucuggcacuguuuggaacu	uucuauuauggguggugg	aucuggcacuguuuggaacucaguaaugacugugauucuauuauggguggugg	chr1:160137669-160137722	Brain, Prefrontal Cortex	ERR409883	21	21	0	0						ATP1A2
JHU_ID_00645	JHU_ID_00645.3p		guuguggacuguaugcucuc	uugcuauaguaacagaug	uugcuauaguaacagaugagaugaggcuacagccuucuauaguuguggacuguaugcucuc	chr1:160208915-160208976	Brain, Cerebellum	SRR553573	2	2	0	0
JHU_ID_00646	JHU_ID_00646.5p		gcagcaagcucuggagcc	ugagggggaugaugggg	gcagcaagcucuggagcccaaccccccucacuucacugauaauccaaggacagaaggagggggguacgggugagggggaugaugggg	chr1:160209766-160209853	Retina	ERR973604	2	2	0	0
JHU_ID_00648	JHU_ID_00648.5p		cugggcugccugacccuggcc	ccggggcgagggagaccucccu	cugggcugccugacccuggcccugccugggggccggggcgagggagaccucccu	chr1:16027445-16027499	Retina	ERR973613	7	7	0	0						CLCNKA
JHU_ID_00649	JHU_ID_00649.5p	JHU_ID_00649.3p	gaauuucagguaaacaaugaau	gucguugcuuaccagaaguuca	gaauuucagguaaacaaugaauaguuuuuuagucugucguugcuuaccagaaguuca	chr1:160342487-160342544	Colon adenocarcinoma	SRR1917336	403	282	0	121		Ago_1495				COPA
JHU_ID_00650	JHU_ID_00650.3p		ccaguccccucuucuuuggug	cccggaggaagacggagggugggag	cccggaggaagacggagggugggagagagguugggccuggcuagcgguucuccaguccccucuucuuuggug	chr1:160342948-160343020	Lung	SRR1608276	1	1	0	0						COPA
JHU_ID_00651	JHU_ID_00651.3p		uguagacauuuagauggcccag	uugccuccagagacagg	uugccuccagagacagguagccucugcacuguagacauuuagauggcccag	chr1:160417477-160417528	Cervical cancer	SRR1304304	62	62	0	0		Ago_1496				VANGL2
JHU_ID_00652	JHU_ID_00652.3p	JHU_ID_00652.5p	caguccccuccuguccccuagg	uaggggagagggguggggugg	uaggggagagggguggggugggggaaagagaggugggcaucuggcccaguccccuccuguccccuagg	chr1:160423985-160424053	Neuron Dopaminergic	SRR5127234	4	3	0	1		Ago_1497				VANGL2
JHU_ID_00653	JHU_ID_00653.5p		cugggcugccugacccuggcc	ccggggcgagggggcccuccc	cugggcugccugacccuggcccugccugggggccggggcgagggggcccuccc	chr1:16049255-16049308	Retina	ERR973613	7	7	0	0						CLCNKB
JHU_ID_00654	JHU_ID_00654.3p		uggaugcugcaggcauag	cagccugcauacucacu	cagccugcauacucacuguuuggcauggcaaagauguaguaguuuccacaguggaugcugcaggcauag	chr1:160673601-160673670	Skin	SRR2174541	16	16	0	0						RP11-404F10.2
JHU_ID_00655	JHU_ID_00655.3p		cauggucccucaucuccccggcu	cccagggaggggagggcgaggcc	cccagggaggggagggcgaggccagcagccaggaagaagcuggaaggcauggucccucaucuccccggcu	chr1:160862118-160862188	Platelet	SRR1592245	6	6	0	0						CD244
JHU_ID_00656	JHU_ID_00656.3p		acugucagagcugucaggagcug	gcacugccagccuguccugucu	gcacugccagccuguccugucugauuuagacugucagagcugucaggagcug	chr1:160862445-160862497	Platelet	SRR1592246	2	2	0	0						CD244
JHU_ID_00657	JHU_ID_00657.3p		ucuggcuguguaugagaguuuuu	ggauucucaucagagccagagc	ggauucucaucagagccagagcucugcccucccucuggcuguguaugagaguuuuu	chr1:161020230-161020286	Valve Interstitial Cell	SRR948072	2	2	0	0						RP11-544M22.13
JHU_ID_00658	JHU_ID_00658.3p		uaggcccccucuuccugaagg	gccaggugaggggaugccaugg	gccaggugaggggaugccauggcggccgugacuccuaggcccccucuuccugaagg	chr1:161038693-161038749	Skin	SRR2174509	4	4	0	0						TSTD1
JHU_ID_00659	JHU_ID_00659.3p		uacacacaucccugucuuacaga	ugaggacagggguaagucugggga	ugaggacagggguaagucuggggagauggggggagcucugcugagggugcacaaggcccuggcucuacacacaucccugucuuacaga	chr1:161052362-161052450	Colon adenocarcinoma	SRR1917329	157	157	0	0		Ago_1500				ARHGAP30
JHU_ID_00660	JHU_ID_00660.3p		acccugcagaagcugagc	acugcuucugcccuucaggcugg	acugcuucugcccuucaggcuggaucgggcugcagaugcccagugccuccccacccacccugcagaagcugagc	chr1:161069442-161069516	T cell leukemia	SRR1532969	3	3	0	0
JHU_ID_00662	JHU_ID_00662.3p		aacgccgguuugucuugac	agagauagagauuggcagcca	agagauagagauuggcagccaucuugcuuuggggcaagcuggcaacgccgguuugucuugac	chr1:161132842-161132904	Dendritic	SRR1708923	2	2	0	0
JHU_ID_00663	JHU_ID_00663.5p		ccggcguugguugaaaau	auucggcgcgcaagag	ccggcguugguugaaaaucacccccgguuuuggccguggccgcgggugaaauucggcgcgcaagag	chr1:161141275-161141341	Brain, Prefrontal Cortex	ERR409883	24	24	0	0						ACA64
JHU_ID_00664	JHU_ID_00664.5p		gccaccgcgccggccauuuugg	uguuuggcuggcgugguggcuc	gccaccgcgccggccauuuuggcuuuaauuuaaauauccuguuuggcuggcgugguggcuc	chr1:161152723-161152784	Brain, Prefrontal Cortex	ERR409882	2	2	0	0
JHU_ID_00665	JHU_ID_00665.3p	JHU_ID_00665.5p	cccgaucuccuuuuuuccuagu	uagggagaagggaguaaacagga	uagggagaagggaguaaacaggaaugaccacaacccuuucccgaucuccuuuuuuccuagu	chr1:161165297-161165358	Neuron iPSC	SRR1777161	15	12	0	3						USP21
JHU_ID_00667	JHU_ID_00667.5p		ugggagggaggccucugaggugu	accugagaggcaggcccucccaga	ugggagggaggccucugagguguaugcagaucagcaccugagaggcaggcccucccaga	chr1:161218356-161218415	Hepatocellular carcinoma (HepG2)	ERR738414	1	1	0	0						FCER1G
JHU_ID_00669	JHU_ID_00669.5p	JHU_ID_00669.3p	uggaggcugcagaggguuucagugg	ugaccuucgugccccgccaggu	uggaggcugcagaggguuucaguggcuuucugcaacagcgccccugaccuucgugccccgccaggu	chr1:16130417-16130483	Colon adenocarcinoma	SRR1917337	99	81	0	18						EPHA2
JHU_ID_00670	JHU_ID_00670.5p		gggucgggguuggggguguc	cuccgcucagcucugccu	gggucgggguugggggugucaugugacgagagucucuuuaaaaggcucuggagcuucuccgcucagcucugccu	chr1:161314260-161314334	Kidney	ERR038423	1	1	0	0						SDHC
JHU_ID_00672	JHU_ID_00672.5p/.3p		gggccuaguccugaacgg	gcucaggcucuggcucug	gggccuaguccugaacggccgguccuuuuuucagacccugcucaggcucuggcucug	chr1:161399259-161399316	Lung	SRR372642	30	30	0	0		Ago_1504
JHU_ID_00673	JHU_ID_00673.5p		uccggcgcagucagggcugc	guccccgaaugcucgucguggag	uccggcgcagucagggcugcagccagagcccggagauaguugggcagggcuccaggcguccccgaaugcucgucguggag	chr1:161399990-161400070	CD4+ T Cell	SRR1532971	5	4	1	0
JHU_ID_00674	JHU_ID_00674.5p		ucgccuccuuccuuccguucu	gagggagagagggagggagg	ucgccuccuuccuuccguucuggggacccacuuaccuccaggagggagagagggagggagg	chr1:16144097-16144158	Blood	SRR2061741	3	3	0	0						EPHA2
JHU_ID_00675	JHU_ID_00675.5p	JHU_ID_00675.3p	ucgauucccggcccaugcagca	ggugcaugggugguucaguggu	ggugcaugggugguucagugguagaauucucgccugccacgcgggaggcccggguucgauucccggcccaugcagca	chr1:161443301-161443378	Plasma	SRR822447	12881	12812	0	69		Ago_1508
JHU_ID_00676	JHU_ID_00676.5p	JHU_ID_00676.3p	agcggaacuugaggagccgagacc	uugggcuccacgggugucagcggcu	uugggcuccacgggugucagcggcuuugguaguaauggcagcggaacuugaggagccgagacc	chr1:161446652-161446715	Monocytic leukemia	DRR000555	173	155	0	18		Ago_1509
JHU_ID_00677	JHU_ID_00677.5p/.3p		caagccgggcccugaagccgccu	guggucuagugguuaggauucggcg	caagccgggcccugaagccgccucucccugguggucuagugguuaggauucggcg	chr1:161447268-161447323	Lung Adenocarcinoma	SRR1013968	33	33	0	0
JHU_ID_00678	JHU_ID_00678.5p		ucgggccuggccccuuggccc	gccuccugggcccccuuggccuccua	ucgggccuggccccuuggcccccugggccuccugggcccccuuggccuccua	chr1:161448095-161448147	Breast adenocarcinoma	ERR227915	2	2	0	0
JHU_ID_00679	JHU_ID_00679.5p	JHU_ID_00679.3p	ucgauucccggcccaugcagca	ggugcaugggugguucaguggu	ggugcaugggugguucagugguagaauucucgccugccacgcgggaggcccggguucgauucccggcccaugcagca	chr1:161450674-161450751	Plasma	SRR822447	13116	13047	0	69		Ago_1512
JHU_ID_00680	JHU_ID_00680.5p		accgcuggucaggugagcaggugg	aguggcucagcugaacagcugggag	accgcuggucaggugagcagguggccagcagccuuggccaguggcucagcugaacagcugggag	chr1:16145079-16145143	Fibroblast Periodonal ligament	SRR5127227	1	1	0	0						EPHA2
JHU_ID_00681	JHU_ID_00681.5p	JHU_ID_00681.3p	agcggaacuugaggagccgagacc	uugggcuccacgggugucagcggcu	uugggcuccacgggugucagcggcuuugguaguaauggcagcggaacuugaggagccgagacc	chr1:161454032-161454095	Monocytic leukemia	DRR000555	183	164	0	19		Ago_1514
JHU_ID_00682	JHU_ID_00682.5p/.3p		caagccgggcccugaagccgccu	guggucuagugguuaggauucggcg	caagccgggcccugaagccgccucucccugguggucuagugguuaggauucggcg	chr1:161454648-161454703	Lung Adenocarcinoma	SRR1013968	31	31	0	0
JHU_ID_00683	JHU_ID_00683.5p		ucgggccuggccccuuggccc	gccuccugggcccccuuggccuccua	ucgggccuggccccuuggcccccugggccuccugggcccccuuggccuccua	chr1:161455476-161455528	Breast adenocarcinoma	ERR227915	2	2	0	0
JHU_ID_00684	JHU_ID_00684.5p	JHU_ID_00684.3p	ucgauucccggcccaugcagca	ggugcaugggugguucaguggu	ggugcaugggugguucagugguagaauucucgccugccacgcgggaggcccggguucgauucccggcccaugcagca	chr1:161458105-161458182	Plasma	SRR822447	13281	13212	0	69		Ago_1517
JHU_ID_00685	JHU_ID_00685.5p	JHU_ID_00685.3p	agcggaacuugaggagccgagacc	uugggcuccacgggugucagcggcu	uugggcuccacgggugucagcggcuuugguaguaauggcagcggaacuugaggagccgagacc	chr1:161461443-161461506	Monocytic leukemia	DRR000555	170	154	0	16		Ago_1519
JHU_ID_00686	JHU_ID_00686.5p/.3p		caagccgggcccugaagccgccu	guggucuagugguuaggauucggcg	caagccgggcccugaagccgccucucccugguggucuagugguuaggauucggcg	chr1:161462059-161462114	Lung Adenocarcinoma	SRR1013968	36	36	0	0
JHU_ID_00687	JHU_ID_00687.5p		ucgggccuggccccuuggccc	gccuccugggcccccuuggccuccua	ucgggccuggccccuuggcccccugggccuccugggcccccuuggccuccua	chr1:161462886-161462938	Breast adenocarcinoma	ERR227915	2	2	0	0
JHU_ID_00688	JHU_ID_00688.5p	JHU_ID_00688.3p	ucgauucccggcccaugcagca	ggugcaugggugguucaguggu	ggugcaugggugguucagugguagaauucucgccugccacgcgggaggcccggguucgauucccggcccaugcagca	chr1:161465465-161465542	Plasma	SRR822447	13353	13283	0	70		Ago_1522
JHU_ID_00689	JHU_ID_00689.5p	JHU_ID_00689.3p	agcggaacuugaggagccgagacc	uugggcuccacgggugucagcggcu	uugggcuccacgggugucagcggcuuugguaguaauggcagcggaacuugaggagccgagacc	chr1:161468823-161468886	Monocytic leukemia	DRR000555	196	177	0	19		Ago_1524
JHU_ID_00690	JHU_ID_00690.5p/.3p		caagccgggcccugaagccgccu	guggucuagugguuaggauucggcg	caagccgggcccugaagccgccucucccugguggucuagugguuaggauucggcg	chr1:161469439-161469494	Lung Adenocarcinoma	SRR1013968	31	31	0	0
JHU_ID_00691	JHU_ID_00691.5p		ucgggccuggccccuuggccc	gccuccugggcccccuuggccuccua	ucgggccuggccccuuggcccccugggccuccugggcccccuuggccuccua	chr1:161470267-161470319	Breast adenocarcinoma	ERR227915	2	2	0	0
JHU_ID_00692	JHU_ID_00692.5p		ugaagcugaacguggaggagcgc	gcucacccgcaaaggcuucuacc	ugaagcugaacguggaggagcgcuccguggggccgcucacccgcaaaggcuucuacc	chr1:16148662-16148719	Immort. Mammary Epi	SRR433868	6	6	0	0						EPHA2
JHU_ID_00693	JHU_ID_00693.5p		cagggagcguggggccugg	aggucucaggcucaggg	cagggagcguggggccuggcuucaauucagcagcucagccaggucucaggcucaggg	chr1:16150761-16150818	Bladder	SRR333672	2	2	0	0						EPHA2
JHU_ID_00694	JHU_ID_00694.3p	JHU_ID_00694.5p	ucgauucccggccaaugcac	uagcauuggugguucagugguaga	uagcauuggugguucagugguagaauucucgccugccacgcgggaggcccggguucgauucccggccaaugcac	chr1:161523845-161523919	Bladder	DRR013040	15877	15716	0	161		Ago_1527				RP11-25K21.6
JHU_ID_00695	JHU_ID_00695.3p		cccugacgcgggcgcggcucuuucc	aacaggaggcgcccagcgcuggguc	aacaggaggcgcccagcgcugggucccuccgcccugacgcgggcgcggcucuuucc	chr1:16152921-16152977	Epithelium Bronchial	SRR5127216	2	2	0	0						EPHA2
JHU_ID_00696	JHU_ID_00696.5p/.3p		ccagcucccggcaggccucgcgc	gcggggccuccugggaguugugg	gcggggccuccugggaguugugguccggccacccgcgcgggacuccagcucccggcaggccucgcgc	chr1:1615809-1615876	Dendritic	SRR1708909	2	2	0	0						MIB2
JHU_ID_00697	JHU_ID_00697.5p		cccggggcugugggaggucgg	gaggcgagcacgggccugcgggc	cccggggcugugggaggucggaucccugaggcgagcacgggccugcgggc	chr1:161605787-161605837	Plasma Cell	SRR060984	1	1	0	0
JHU_ID_00698	JHU_ID_00698.3p	JHU_ID_00698.5p	aaacuuuucugagccggagccu	ucccggguaacgaaacguuu	ucccggguaacgaaacguuuuugucuuuccuucuacgaaaaacuuuucugagccggagccu	chr1:161612776-161612837	Lung cancer	SRR1013983	12	9	0	3		Ago_1528
JHU_ID_00699	JHU_ID_00699.5p		acgggcgggccaggggcgggc	gcgccccgcccccuguca	acgggcgggccaggggcgggcacggcgggcacccccacccggagcgcgccccgcccccuguca	chr1:1616170-1616233	Blood	SRR837474	1	1	0	0						MIB2
JHU_ID_00700	JHU_ID_00700.3p		ucagaacuucucacucuccugcc	ugggaggagcauucucugagg	ugggaggagcauucucugagggcuuccugcauuucaccucagaacuucucacucuccugcc	chr1:161631496-161631557	Blood	SRR2061745	2	2	0	0						FCGR3B
JHU_ID_00701	JHU_ID_00701.5p		ucucuuucugcuggucucucguc	agagggagcggcgguggggagu	ucucuuucugcuggucucucgucucucagcagcaggaagaggagagggagcggcgguggggagu	chr1:16167367-16167431	Hodgkin lymphoma	SRR1535278	3	3	0	0
JHU_ID_00702	JHU_ID_00702.3p		cccaggaguucugggcucuagug	ugccaguagucccagcuccucaggggg	ugccaguagucccagcuccucagggggcugcaguaggaggaucgcuugaacccaggaguucugggcucuagug	chr1:161735826-161735899	Blood	SRR1949845	30	30	0	0						RN7SL466P
JHU_ID_00703	JHU_ID_00703.3p	JHU_ID_00703.5p	ugauucauguguacauuaaagu	cuuuaauguacacaugaaucacc	cuuuaauguacacaugaaucacccagcgcccuggugauucauguguacauuaaagu	chr1:161736766-161736822	Colon adenocarcinoma	SRR1917330	19	12	0	7		Ago_1529
JHU_ID_00704	JHU_ID_00704.3p	JHU_ID_00704.5p	ccagugcugggcuguggcugugg	guggccacagcucuggucugcug	guggccacagcucuggucugcuggucugcucccuggagccccuccaccagugcugggcuguggcugugg	chr1:1618050-1618119	Colon adenocarcinoma	SRR1917329	161	160	0	1		Ago_61				MIB2
JHU_ID_00705	JHU_ID_00705.5p		cccagcugucagagucuccggu	ugggcucugggagccggag	cccagcugucagagucuccgguccccaggcaagagucugaggcugggcucugggagccggag	chr1:16205214-16205276	Neuroblastoma	SRR1304311	2	2	0	0						ARHGEF19
JHU_ID_00706	JHU_ID_00706.3p		uggagguaccucgaggggacagg	ugcccuuccagaggaucacccgcc	ugcccuuccagaggaucacccgccucaagauguugguggagguaccucgaggggacagg	chr1:16205519-16205578	Neuron iPSC	SRR1777169	2	2	0	0						ARHGEF19
JHU_ID_00707	JHU_ID_00707.3p		accuggucggugggucuaaga	uuaguucucucaucucucagaaua	uuaguucucucaucucucagaauagaccuggucggugggucuaaga	chr1:162071659-162071705	Neuron Dopaminergic	SRR5127234	4	4	0	0						NOS1AP
JHU_ID_00708	JHU_ID_00708.5p		aagacgggcgggggagagcgugg	ccgccagccccugcccggcuuuu	aagacgggcgggggagagcguggggcgcccgccagccccugcccggcuuuu	chr1:16207219-16207270	Neuron iPSC	SRR1777161	2	2	0	0		Ago_313				ARHGEF19
JHU_ID_00709	JHU_ID_00709.5p	JHU_ID_00709.3p	uacucugcuuaauuaaaacc	uuuuaauuaagcagaguaguga	uacucugcuuaauuaaaaccaggccuguguacgugguuuuaauuaagcagaguaguga	chr1:162235628-162235686	Colon adenocarcinoma	SRR1917329	21	16	0	5	TJU_CMC_MD2.ID00227.5p-miR	Ago_1533
JHU_ID_00710	JHU_ID_00710.3p		caggcugcuggaggaccugccc	gccuuccagagcccauggc	gccuuccagagcccauggcuucaggagagggucucucuccaggacugccaggcugcuggaggaccugccc	chr1:162367712-162367782	Cervical cancer	SRR1575597	3	3	0	0						RP11-565P22.6
JHU_ID_00712	JHU_ID_00712.3p		ugucauggcugcuugaagucccggg	ugggacucgggugcaccacggcuuc	ugggacucgggugcaccacggcuuccggugucauggcugcuugaagucccggg	chr1:162497817-162497870	Dendritic	SRR1708910	4	4	0	0						UHMK1
JHU_ID_00713	JHU_ID_00713.5p/.3p		gggucugcuaggaggggc	cccuccugcgcacuaa	cccuccugcgcacuaacugagggugaaggaugucgguugggucugcuaggaggggc	chr1:162561306-162561362	Lung Adenocarcinoma	SRR1304309	13	13	0	0	TJU_CMC_MD2.ID00228.5p-miR					RP11-359K18.3
JHU_ID_00715	JHU_ID_00715.5p		caugccuguagccucugc	cgaggcugcagug	caugccuguagccucugcuacucgagaggcugaagcaagaggauugcuucagccugaggaagucgaggcugcagug	chr1:16258809-16258885	Lung	SRR1608281	1	1	0	0						FBXO42
JHU_ID_00717	JHU_ID_00717.3p		uaggauaggaauuugggc	cuuccagagugcuggg	cuuccagagugcugggauuacacgcgugagccaccaugcucggcgacuguacguuuuaggauaggaauuugggc	chr1:16320048-16320122	Testes	SRR553576	17	17	0	0						FBXO42
JHU_ID_00718	JHU_ID_00718.5p		cggaugugagugcucuuggauauc	ugugcaggagaagucuucccuu	cggaugugagugcucuuggauaucgccaaggggagggaaacugugcuugaggugugcaggagaagucuucccuu	chr1:16352808-16352882	CD8+ T Cell (Neonatal)	SRR1853807	3	3	0	0
JHU_ID_00719	JHU_ID_00719.3p		cuguugaagcaccucugucuuuca	acgggacacaggugccaacacugugggcc	acgggacacaggugccaacacugugggccacuugguguggcuguugaagcaccucugucuuuca	chr1:1636482-1636546	Retina	ERR973611	2	2	0	0						CDK11B
JHU_ID_00720	JHU_ID_00720.3p		ugcaggauauggggugggaga	uuguucucccagucaagcaaaca	uuguucucccagucaagcaaacaggaagugggaggugagggagccucagauccugugcaggauauggggugggaga	chr1:163884301-163884377	H9 Differentiated Midbrain	SRR1988301	2	2	0	0
JHU_ID_00721	JHU_ID_00721.5p		accggcagcaacucugagg	ucagagcagucugccgguga	accggcagcaacucugaggaggcaucagagcagucugccgguga	chr1:1641657-1641701	Dendritic	SRR1708920	2	2	0	0						CDK11B
JHU_ID_00722	JHU_ID_00722.5p	JHU_ID_00722.3p	guaccuggaaccgccuggccaa	cccaggaaggcccagguucaccc	guaccuggaaccgccuggccaaggccuugaccacugcugcccaggaaggcccagguucaccc	chr1:1641843-1641905	Hepatocellular carcinoma (HepG2)	ERR738411	14	8	0	6						CDK11B
JHU_ID_00723	JHU_ID_00723.5p		ggacggguagcucaguugga	ucgcugggagcugcagacugga	ggacggguagcucaguuggaaaugcagaaaucaccugccuucugcauugaucucgcugggagcugcagacugga	chr1:164195333-164195407	Lung	SRR372614	45	45	0	0
JHU_ID_00725	JHU_ID_00725.3p		cggggaaagagagaagaagaac	ccuucuucugucuuucugcgua	ccuucuucugucuuucugcguacaauaaaaauguacggggaaagagagaagaagaac	chr1:164625419-164625476	Platelet	SRR1592245	4	4	0	0
JHU_ID_00726	JHU_ID_00726.3p	JHU_ID_00726.5p	cgaggccccacuccuacccagg	uggguggguggaggaggcgucc	uggguggguggaggaggcguccugguccugggagggaugcccugcucacgaggccccacuccuacccagg	chr1:16476061-16476131	BrainPrefrontalCortex	ERR409883	193	192	0	1		Ago_317
JHU_ID_00727	JHU_ID_00727.3p		ucaggggauccucugaacucuggcc	cucugagcagugcuaucccuagacc	cucugagcagugcuaucccuagaccuuacucaggggauccucugaacucuggcc	chr1:16476515-16476569	Epithelium Keratinocyte (Adult)	SRR5127203	1	1	0	0
JHU_ID_00728	JHU_ID_00728.3p		caccugcccucuguccugcagc	ugugggagauucggggcaggaaag	ugugggagauucggggcaggaaagugacaugggccacccaccugcccucuguccugcagc	chr1:16477073-16477133	Endothelial Aortic	SRR5139121	1	1	0	0
JHU_ID_00729	JHU_ID_00729.5p		ccuggccuggggaaggaua	cccuuccucugugcccucau	ccuggccuggggaaggauaugggaccgaagccugagaguuagguuuccacucccuuccucugugcccucau	chr1:16482411-16482482	Plasma Cell	SRR060984	1	1	0	0
JHU_ID_00730	JHU_ID_00730.3p		cccucuguguggggccuggccug	gcugcccauccccacuagugggac	gcugcccauccccacuagugggacacucacucccccaggguacagccugguuuggucaccccucuguguggggccuggccug	chr1:16485145-16485227	Dendritic	SRR1708920	3	3	0	0
JHU_ID_00731	JHU_ID_00731.5p	JHU_ID_00731.3p	acggaggcccgcaggucagaac	aaugcccugcgauccucccgga	acggaggcccgcaggucagaaccgcagucucaccugucuuggcggaaaugcccugcgauccucccgga	chr1:16513490-16513558	Lung Adenocarcinoma	SRR1013980	592	400	9	183		Ago_320
JHU_ID_00732	JHU_ID_00732.5p		gccccugcgucuguucucu	gccagauggagccggggcau	gccccugcgucuguucucucccaaagaagcugguccuuagccuguguuaaggagcaaucuuucgguggccagauggagccggggcau	chr1:16514640-16514727	Skin	SRR2174517	4	4	0	0
JHU_ID_00734	JHU_ID_00734.3p		gaggcauuggugguucaguggua	ccgcuuggaacgguuucuaagucuuug	ccgcuuggaacgguuucuaagucuuuguggauacuguuuucuguuauccugcaggcgguuguuacgcagaggcauuggugguucaguggua	chr1:16545989-16546080	Melanoma	SRR1913138	19	19	0	0		Ago_322
JHU_ID_00735	JHU_ID_00735.3p		ugcucuguggcuguuguccua	gggcagcagagacagagcccu	gggcagcagagacagagcccuuaugcaaaauggagucacuugggaggaagggagugcucuguggcuguuguccua	chr1:165601810-165601885	Colon adenocarcinoma	SRR1917331	2	2	0	0						RP11-306I1.2
JHU_ID_00736	JHU_ID_00736.3p		gaggcugaagugggaggaucac	gagacucucaugucuacuc	gagacucucaugucuacucaggaggcugaagugggaggaucac	chr1:165647823-165647866	Heart	ERR038426	1	1	0	0						MGST3
JHU_ID_00738	JHU_ID_00738.5p		ucaccugaacccgggcagcagag	ccagccugggcaacaagagcgaaa	ucaccugaacccgggcagcagagguugcagugagccgaaaucaugccauugcacuccagccugggcaacaagagcgaaa	chr1:165722320-165722399	Coronary Endothelial Cell	SRR5127228	3	3	0	0
JHU_ID_00740	JHU_ID_00740.3p		uggcggguggguggagcgcgcucc	acgcccgcauuccacccccuugaccgcu	acgcccgcauuccacccccuugaccgcugggaccccuaguggcggguggguggagcgcgcucc	chr1:1659356-1659419	Epithelium Keratinocyte (Adult)	SRR5127203	2	2	0	0						RP11-345P4.10
JHU_ID_00742	JHU_ID_00742.3p		aaguagcaugaacaccagaguucc	aacuuuggguucagccacuucu	aacuuuggguucagccacuucugugaagagccucuuugcuagcaacagccagccccaccggugaacaaaguagcaugaacaccagaguucc	chr1:1661366-1661457	Testes	SRR333688	11	11	0	0						SLC35E2B
JHU_ID_00743	JHU_ID_00743.5p	JHU_ID_00743.3p	ucuggccacugagagauuuacg	uaaaucccucaguggucagaga	uaaaucccucaguggucagagagccacucaguggcucucuggccacugagagauuuacg	chr1:166168171-166168230	Adrenal	SRR944034	18	17	0	1
JHU_ID_00744	JHU_ID_00744.3p		cccuauaggacccuguagucuag	agagcagagccauggggag	agagcagagccauggggagauuguagucuacucccuauaggacccuguagucuag	chr1:166197896-166197951	Neuron Dopaminergic	SRR5127234	39	39	0	0
JHU_ID_00745	JHU_ID_00745.5p	JHU_ID_00745.3p	ugcacgaugaacaagcuggggg	uggcagcugagcaggcgggagc	ugcacgaugaacaagcugggggaugcugggagugcuacucagucucugggugggagccagcucuccuggcagcugagcaggcgggagc	chr1:16624439-16624527	Testes	SRR333688	9	8	0	1
JHU_ID_00746	JHU_ID_00746.5p	JHU_ID_00746.3p	gauccucugaacucuggcccugc	ugggcucugagcagugcuauccc	ugggcucugagcagugcuaucccuagaccuuacucaggggauccucugaacucuggcccugc	chr1:16626726-16626788	Brain, Prefrontal Cortex	ERR409900	19	15	0	4
JHU_ID_00747	JHU_ID_00747.3p		gugccugggaguuugucug	gaucagaacccaggagacga	gaucagaacccaggagacgagugugccugggaguuugucug	chr1:16630393-16630434	Lung	SRR1608277	1	1	0	0
JHU_ID_00748	JHU_ID_00748.5p/.3p		ucucccucaccgcacuccag	ggugggccagggagggaggga	ggugggccagggagggagggaaaggggagguuucagguaagacagaaccccgaccacucuuugucucccucaccgcacuccag	chr1:16631613-16631696	Retina	ERR973613	10	10	0	0		Ago_327
JHU_ID_00749	JHU_ID_00749.5p		uccaggaggccggccugg	gggucgagccagcccuggaga	uccaggaggccggccugggaaugagcacaggccugcggcuggcagagagccgggucgagccagcccuggaga	chr1:16633246-16633318	Thyroid	SRR1658408	1	1	0	0
JHU_ID_00750	JHU_ID_00750.5p/.3p		uuuuuaauguauuuuaaggcca	gccuuaaaauacauuuuaauu	gccuuaaaauacauuuuaauuuuuuaaaauacaaauaauuuuuaauguauuuuaaggcca	chr1:16635332-16635392	Plasma	SRR822437	3	3	0	0
JHU_ID_00751	JHU_ID_00751.5p		acugaccugugggaccugagg	ucaggucaggguccagca	acugaccugugggaccugaggccuggccccucauggcuccugucaccaggucucaggucaggguccagca	chr1:16645448-16645518	Blood	SRR2201550	3	3	0	0
JHU_ID_00752	JHU_ID_00752.5p		ggggugcuggugcgggugcuga	agcgcuggcacucgcgcccuga	ggggugcuggugcgggugcugaagaucccagcgcuggcacucgcgcccuga	chr1:16647253-16647304	Plasma	SRR822437	1	1	0	0
JHU_ID_00753	JHU_ID_00753.3p	JHU_ID_00753.5p	aaugcccugcgauccucccgg	cauggaggcccgcaggucag	cauggaggcccgcaggucagaaccgcagucucaccugucuuggcggaaaugcccugcgauccucccgg	chr1:16666165-16666233	Breast adenocarcinoma	SRR873382	22	18	1	3						RP1-163M9.8
JHU_ID_00754	JHU_ID_00754.5p		cugugcuagcggggagugu	ccucauagagccagguagaa	cugugcuagcggggaguguguucucaccucauagagccagguagaa	chr1:16666373-16666419	Fibroblast Lung	SRR1988286	2	2	0	0						RP1-163M9.8
JHU_ID_00755	JHU_ID_00755.3p	JHU_ID_00755.5p	acgccauaggagaaaaagc	cuuuuuucguauugguuugu	cuuuuuucguauugguuugugucuuaguuguuaauccuacaguggaggccuggggaauaagaaguaacauguggccugcacgccauaggagaaaaagc	chr1:16666642-16666740	Cervical cancer	SRR1240813	18	5	12	1						RP1-163M9.8
JHU_ID_00756	JHU_ID_00756.5p	JHU_ID_00756.3p	aaccuuucgguggccagaugg	cucccaaagaagcugguccu	cucccaaagaagcugguccuuagccuguguuaaggagcaaccuuucgguggccagaugg	chr1:16667319-16667378	Lung	SRR1608284	19	17	0	2
JHU_ID_00757	JHU_ID_00757.5p		cugcagaccuggcccuccc	gagcaggcaggagcu	cugcagaccuggcccucccacuccauggagcaggcaggagcu	chr1:166816944-166816986	Macrophage	SRR1532975	2	2	0	0
JHU_ID_00758	JHU_ID_00758.5p		cguccaggccaacacgcgg	gcgucgcccgggggcc	cguccaggccaacacgcgggugcucuccuggccucgggcugccagcccgccccggagacgcccgcgucgcccgggggcc	chr1:166876059-166876138	Lung	SRR1608279	1	1	0	0						TADA1
JHU_ID_00760	JHU_ID_00760.5p	JHU_ID_00760.3p	aagggaguagaagggaaagacu	ucuuucccuucuacuccuuuua	aagggaguagaagggaaagacuauuuggaaugcuuuauuaaaauagucuuucccuucuacuccuuuua	chr1:166926645-166926713	BrainPrefrontalCortex	SRR1759214	61	53	0	8						ILDR2
JHU_ID_00761	JHU_ID_00761.3p		ugcucuugaucucccuccacagu	ggugugaggguuguggaggguggg	ggugugaggguuguggagggugggacgacguaaucucucuugcucuugaucucccuccacagu	chr1:166935476-166935539	Neuron iPSC	SRR1777161	6	6	0	0						ILDR2
JHU_ID_00762	JHU_ID_00762.3p		aaguccuguaagaaguuacgcca	gcgaacauucuagccuagaggacuugc	gcgaacauucuagccuagaggacuugcuaguuaaguccuguaagaaguuacgcca	chr1:166975927-166975982	Dendritic	SRR1708909	2	2	0	0						MAEL
JHU_ID_00763	JHU_ID_00763.3p		aggaggagcggcgcugcccgcagc	ucagggcuagcgccgccccccac	ucagggcuagcgccgccccccaccccucaaccugccccuacucacugccggugggcgaggaggagcggcgcugcccgcagc	chr1:16699381-16699462	Hepatocellular carcinoma (HepG2)	ERR738414	1	1	0	0
JHU_ID_00765	JHU_ID_00765.5p		uuauuagucacggacagacggg	ugucugugugaugcaggg	uuauuagucacggacagacgggaugaaaacacacaucugucugugugaugcaggg	chr1:16713679-16713734	Testes	SRR333688	12	12	0	0
JHU_ID_00766	JHU_ID_00766.5p	JHU_ID_00766.3p	aaccuuucgguggccagaugg	cucccaaagaagcugguccu	cucccaaagaagcugguccuuagccuguguuaaggagcaaccuuucgguggccagaugg	chr1:16740086-16740145	Lung	SRR1608284	19	17	0	2						RP5-1182A14.7
JHU_ID_00767	JHU_ID_00767.5p		cugugcuagcggggagugu	ccucauagagccagguagaa	cugugcuagcggggaguguguucucaccucauagagccagguagaa	chr1:16741045-16741091	Fibroblast Lung	SRR1988286	2	2	0	0
JHU_ID_00768	JHU_ID_00768.5p	JHU_ID_00768.3p	aaugcccugcgauccucccgg	cauggaggcccgcaggucag	cauggaggcccgcaggucagaaccgcagucucaccugucuuggcggaaaugcccugcgauccucccgg	chr1:16741231-16741299	Breast adenocarcinoma	SRR873382	56	34	3	19
JHU_ID_00770	JHU_ID_00770.5p		aggcccccgcgcugagagaccagg	gggcuccggcgcugggggccgag	aggcccccgcgcugagagaccagggcguggaucugcgccgggcuccggcgcugggggccgag	chr1:167455714-167455776	Dendritic	SRR1708918	6	6	0	0						CD247
JHU_ID_00771	JHU_ID_00771.5p		gcugccuggacagcauggc	ccuggugucucccagccca	gcugccuggacagcauggccugaauaggaaacuugcaaaugugugugcccugucccccuggugucucccagccca	chr1:167460845-167460920	SkinDermis	SRR1259216	34	34	0	0
JHU_ID_00772	JHU_ID_00772.3p	JHU_ID_00772.5p	uagagcugaauuacuuuccaga	uggaaaguaagucagcccuaag	uggaaaguaagucagcccuaaguuuaaauagcccagaaaauuuagagcugaauuacuuuccaga	chr1:167471283-167471347	CD4+ T Cell	SRR1532973	87	86	0	1	TJU_CMC_MD2.ID00232.3p-miR	Ago_1570
JHU_ID_00773	JHU_ID_00773.5p		cuucucugcuccagcucuga	auacggacccugagaagag	cuucucugcuccagcucugacaucucggcuccacauacaguggucugaaguggcauacggacccugagaagag	chr1:167501797-167501870	Neuron iPSC	SRR1777169	4	4	0	0
JHU_ID_00774	JHU_ID_00774.5p		ugggcagguggagggcagg	uggcacccacccucagc	ugggcagguggagggcagggccugccucugccccacccuggcacccacccucagc	chr1:16750587-16750642	Hepatocellular carcinoma (HepG2)	ERR738403	2	2	0	0
JHU_ID_00776	JHU_ID_00776.5p		ggggugcuggugcgggugcuga	agcgcuggcacucgcgcccuga	ggggugcuggugcgggugcugaagaucccagcgcuggcacucgcgcccuga	chr1:16760166-16760217	Plasma	SRR822437	1	1	0	0
JHU_ID_00777	JHU_ID_00777.3p		gggacaggugauggugagc	gcauucucacccgcccaa	gcauucucacccgcccaaccccagcucaaccaggggaggggagccccaucagaggugggcaaugggacaggugauggugagc	chr1:167629090-167629172	Testes	SRR333680	2	2	0	0						RP3-455J7.4
JHU_ID_00778	JHU_ID_00778.5p	JHU_ID_00778.3p	uuagagaagucagggagcuau	agcuucaugacuucucuaaag	agcuucaugacuucucuaaaggggcaauaaguuuguccuuuagagaagucagggagcuau	chr1:167631829-167631889	B Cell_Pre-germinal center	SRR060983	10	8	0	2		Ago_1573				RCSD1
JHU_ID_00781	JHU_ID_00781.5p	JHU_ID_00781.3p	gugggggucugagaauuugcau	gcauauuacuggaccccacuc	gcauauuacuggaccccacucucagaauuagguuuggagugggggucugagaauuugcau	chr1:168038648-168038708	Skin	SRR2174513	49	40	0	9		Ago_1580
JHU_ID_00782	JHU_ID_00782.5p		accggccggggaaugcgcu	cggaaggagccuuugcugggug	accggccggggaaugcgcuuuagggccggguagggcugggggccccgagguccaggcggaaggagccuuugcugggug	chr1:168226447-168226525	Lung	SRR1608281	1	1	0	0						SFT2D2
JHU_ID_00783	JHU_ID_00783.3p		guuucugacugauaaaggcgcu	agucuuuaccagucagcaacca	agucuuuaccagucagcaaccacaaacuaacuucuguuggugguuucugacugauaaaggcgcu	chr1:168341224-168341288	T cell leukemia	SRR1292461	12	12	0	0
JHU_ID_00784	JHU_ID_00784.3p		gaggacagugucugagagaa	cuuucagggagcuguuggcug	cuuucagggagcuguuggcugcaaggagagccucagcugaggacagugucugagagaa	chr1:168430397-168430455	Skin	SRR2174541	17	17	0	0
JHU_ID_00785	JHU_ID_00785.3p		uucacauucuggcucugcucuu	uggcagagccagaaaaugaaug	uggcagagccagaaaaugaaugcaggcagccugacuccugcauucacauucuggcucugcucuu	chr1:168448197-168448261	Blood	SRR2061740	3	3	0	0
JHU_ID_00786	JHU_ID_00786.5p		ugagugcacgugauugaguuc	acucuuccaaugugcacuuaga	ugagugcacgugauugaguucaucacucuccacugagaacucuuccaaugugcacuuaga	chr1:168521074-168521134	Brain, Prefrontal Cortex	ERR409893	2	2	0	0
JHU_ID_00787	JHU_ID_00787.5p/.3p		aaccuuucgguggccagaugg	guucucucccaaaaaagcugg	guucucucccaaaaaagcugguccuuagccuguguuaaggagcaaccuuucgguggccagaugg	chr1:16895550-16895614	Lung	SRR1608284	17	17	0	0
JHU_ID_00788	JHU_ID_00788.3p		cgaaggaguuccccugcccug	ggacagggcgacuucuaugua	ggacagggcgacuucuauguagaugaggcagcgcagaggcugcugcuucgccacuugcugcuucgccacgaaggaguuccccugcccug	chr1:16895745-16895834	Plasma	SRR822445	1	1	0	0
JHU_ID_00789	JHU_ID_00789.5p	JHU_ID_00789.3p	agacuguacgcuaaggguca	gucuugguuggcgucuuaaaugu	agacuguacgcuaagggucauaucuuuuuuuguuuugguuugugucuugguuggcgucuuaaaugu	chr1:16896166-16896232	B Cell_naive	SRR060985	36	34	0	2
JHU_ID_00790	JHU_ID_00790.5p	JHU_ID_00790.3p	aaugcccugcgauccucccgga	auggaggcccguaggucagaac	auggaggcccguaggucagaaccgcagucucaccugucuuggcggaaaugcccugcgauccucccgga	chr1:16896709-16896777	Dendritic	SRR1708913	142	114	3	25
JHU_ID_00791	JHU_ID_00791.5p		ggggggaauugugagcug	guucuggucugucaau	ggggggaauugugagcugcaccugcacagaggagcugaggcaagcagggcaguucuggucugucaau	chr1:16906897-16906964	Plasma	SRR822444	9	9	0	0		Ago_335
JHU_ID_00793	JHU_ID_00793.5p		aaggcgcgcgaagguaggu	aggccgcgcgccuggg	aaggcgcgcgaagguagguggccgggggcgcgcgcgugcgcgggggcgggacggacgcgcucccggcggaggaggccgcgcgccuggg	chr1:16914125-16914213	Skin	SRR1259236	2	2	0	0
JHU_ID_00794	JHU_ID_00794.5p/.3p		aggcccaggacucucacc	acagaagccugagccugc	acagaagccugagccugccuucccaggaggcccaggacucucacc	chr1:16929783-16929828	Hepatocellular carcinoma (HepG2)	ERR738406	6	6	0	0						CROCC
JHU_ID_00795	JHU_ID_00795.5p		ugcuuuaaccucucucccacccagg	ccggcuggaggaggagcagcaga	ugcuuuaaccucucucccacccaggacacagagcacagccaagaccuggaaagcgcccucauccggcuggaggaggagcagcaga	chr1:16930262-16930347	SkinEpidermis	SRR1259212	15	15	0	0						CROCC
JHU_ID_00796	JHU_ID_00796.3p		cccucuguguggggccuggccug	ccccacccccaccagugggac	ccccacccccaccagugggacacucacucccccaggguacagccugguuuggucaccccucuguguggggccuggccug	chr1:16938082-16938161	Dendritic	SRR1708920	3	3	0	0						CROCC
JHU_ID_00797	JHU_ID_00797.5p	JHU_ID_00797.3p	gauccucugaacucuggcccugc	ugggcucugagcagugcuauccc	ugggcucugagcagugcuaucccuagacccuacucaggggauccucugaacucuggcccugc	chr1:16945969-16946031	Brain, Prefrontal Cortex	ERR409900	22	18	0	4						CROCC
JHU_ID_00799	JHU_ID_00799.3p		uucccaggcugcccacgccucug	gggugguggcagccagcgggagca	gggugguggcagccagcgggagcaggaaaggaagcauguucccaggcugcccacgccucug	chr1:169586360-169586421	Hepatocellular carcinoma (HepG2)	ERR738403	2	2	0	0						F5
JHU_ID_00800	JHU_ID_00800.3p		uccaccuccuggcaucacuccagc	uuagggguggggcgucggguugggagagg	uuagggguggggcgucggguugggagaggucuugccgaccuccaccuccuggcaucacuccagc	chr1:16960695-16960759	Lung	SRR1216774	14	14	0	0	TJU_CMC_MD2.ID00066.3p-miR	Ago_339				CROCC
JHU_ID_00801	JHU_ID_00801.3p	JHU_ID_00801.5p	aguagauguguauugccaggc	cugguaauauacauuuacuga	cugguaauauacauuuacugagguuuuaaaauucaguagauguguauugccaggc	chr1:169848261-169848316	Lung Adenocarcinoma	SRR1013980	96	94	0	2		Ago_1600				C1orf112
JHU_ID_00802	JHU_ID_00802.3p		ucacaccacguuccccaccagg	uggugggagggaggggugugg	uggugggagggagggguguggagugguccucacaccacguuccccaccagg	chr1:16997174-16997225	Dendritic	SRR1708915	4	4	0	0		Ago_340				ATP13A2
JHU_ID_00803	JHU_ID_00803.5p/.3p		gagggugggggggcauggcug	gcuggccccaccuagcugagc	gagggugggggggcauggcuggggcuggccccaccuagcugagc	chr1:17000163-17000207	Osteoblast	SRR5127233	1	1	0	0		Ago_341				ATP13A2
JHU_ID_00804	JHU_ID_00804.3p	JHU_ID_00804.5p	gugcuccccacgcucccgacagg	gcgggagggcggggaccgggcg	gcgggagggcggggaccgggcgguccugagccaggccgugcuccccacgcucccgacagg	chr1:1701089-1701149	Bladderepithelium	DRR013035	190	186	0	4
JHU_ID_00805	JHU_ID_00805.5p		gccuggcccuguggcucacgcc	cuugagcccaggaguuagaggcug	gccuggcccuguggcucacgccuauaauccuagcgcuuugggaggugggaggauugcuugagcccaggaguuagaggcug	chr1:17015308-17015388	Osteoblast	SRR5127233	6	6	0	0
JHU_ID_00806	JHU_ID_00806.5p		ucugaggaggcacuuugaagugu	aagcaagaugugccuccucccgau	ucugaggaggcacuuugaaguguuugugguagaggccacaugugcaagcaagaugugccuccucccgau	chr1:170309486-170309555	Neuron iPSC	SRR1777164	2	2	0	0
JHU_ID_00807	JHU_ID_00807.3p		cuguugaagcaccucugucuuuca	acgggacacaggugccaacacugugggcc	acgggacacaggugccaacacugugggccacuugguguggcuguugaagcaccucugucuuuca	chr1:1703625-1703689	Retina	ERR973611	3	3	0	0						RP1-283E3.8
JHU_ID_00809	JHU_ID_00809.5p	JHU_ID_00809.3p	ugggauccuuuggugacauga	uaugacaucacuggaaccccgu	ugggauccuuuggugacaugaauuuugcucuagugguuuaugacaucacuggaaccccgu	chr1:170680449-170680509	Neuron iPSC	SRR1777161	3	2	0	1	TJU_CMC_MD2.ID00234.3p-miR
JHU_ID_00810	JHU_ID_00810.5p		uugcaucuaagguggauaacuu	guuauccaccuuagaugcaagu	uugcaucuaagguggauaacuuccagccauucuccccuaaggggagaaguuauccaccuuagaugcaagu	chr1:170805475-170805545	Mesangial	SRR5127221	28	28	0	0
JHU_ID_00811	JHU_ID_00811.3p		gggguggguccaggcuaggaga	uccuacuagugggccauuccua	uccuacuagugggccauuccuaugcuaugcuccacccugcucaaagcgccaaagggguggguccaggcuaggaga	chr1:17086390-17086465	Brain, Prefrontal Cortex	ERR409888	2	2	0	0						PADI2
JHU_ID_00812	JHU_ID_00812.5p		accggcagcaacucugagg	ucagagcagucugccgguga	accggcagcaacucugaggaggcaucagagcagucugccgguga	chr1:1708789-1708833	Dendritic	SRR1708920	2	2	0	0						RP1-283E3.8
JHU_ID_00813	JHU_ID_00813.3p	JHU_ID_00813.5p	cccaggaaggcccagguucaccc	guaccuggaaccgccuggcca	guaccuggaaccgccuggccaaggccuugaccacugcugcccaggaaggcccagguucaccc	chr1:1708975-1709037	Bladder	DRR013041	17	9	0	8						RP1-283E3.8
JHU_ID_00814	JHU_ID_00814.3p		agauguacugaaccagaauau	guucugguucaguauauuaaa	guucugguucaguauauuaaagauaacucaaagauagauguacugaaccagaauau	chr1:171107284-171107340	Lung	SRR372638	1	1	0	0
JHU_ID_00815	JHU_ID_00815.3p		uaaguauacuguuggguagauu	ucuacccagcaguauacuuacc	ucuacccagcaguauacuuaccugucuuccauguacacagguaaguauacuguuggguagauu	chr1:171248849-171248912	Kidney	SRR553575	21	21	0	0						FMO1
JHU_ID_00816	JHU_ID_00816.3p		cucggcagggagccuguaagca	cuuacaggcucccugcugagcc	cuuacaggcucccugcugagcccuguaaacaguugcgacucggcagggagccuguaagca	chr1:171251725-171251785	Skin	SRR2174513	14	14	0	0	TJU_CMC_MD2.ID00236.5p-miR	Ago_1610				FMO1
JHU_ID_00817	JHU_ID_00817.3p		gcagcgggaguucuggaccggucug	aaccggagucagacccgccccau	aaccggagucagacccgccccauguggucugcagcgggaguucuggaccggucug	chr1:171485948-171486003	Retina	ERR973618	2	2	0	0						PRRC2C
JHU_ID_00818	JHU_ID_00818.5p	JHU_ID_00818.3p	auucaguccaaguugcugu	cagcaacuuggacugaaac	auucaguccaaguugcuguccaagucagcaacuuggacugaaac	chr1:171743367-171743411	Lung	SRR372624	3	2	0	1		Ago_1616
JHU_ID_00819	JHU_ID_00819.3p		ucggccuccgcuuugucuugga	caggcggggcggagagcgcgc	caggcggggcggagagcgcgcuugcuuccugggcucggccuccgcuuugucuugga	chr1:171781322-171781378	Cervical cancer	SRR1304304	14	14	0	0		Ago_1617				SCARNA20
JHU_ID_00821	JHU_ID_00821.3p		ccugggcuuguggcuacuugcucu	agcaggagucacccaugagcuagaaa	agcaggagucacccaugagcuagaaacccuucugcugccagcugggugcccugggcuuguggcuacuugcucu	chr1:17215554-17215627	Neuron Dopaminergic	SRR5127234	8	8	0	0						PADI1
JHU_ID_00822	JHU_ID_00822.3p		uggcggguggguggagcgcgcucc	acgcccgcauuccacccccuugaccgcu	acgcccgcauuccacccccuugaccgcugggaccccuaguggcggguggguggagcgcgcucc	chr1:1724667-1724730	Epithelium Keratinocyte (Adult)	SRR5127203	2	2	0	0						RP1-283E3.8
JHU_ID_00823	JHU_ID_00823.3p	JHU_ID_00823.5p	agcagucuuggccuauggacugga	cugggcaacagagcgagacucu	cugggcaacagagcgagacucuaucucaaaaaaaaaaaaaaaaaagagagagagauagcagucuuggccuauggacugga	chr1:172933778-172933858	Lung squamous carcinoma	SRR1013975	3	2	0	1
JHU_ID_00824	JHU_ID_00824.5p		ugggcugggagacccuugggccc	gccccuuugguccccuucccucu	ugggcugggagacccuugggcccuguuggggagggcccuguaagcugccacugcccacccuccacaggugccccuuugguccccuucccucu	chr1:173416437-173416529	Brain, Prefrontal Cortex	ERR409882	2	2	0	0
JHU_ID_00825	JHU_ID_00825.5p		gugcgaugggguagacgg	uucaaucucagcgucc	gugcgaugggguagacggacaucuucccuccaggcugcucgggcagggcuggaggggagugggcuucaaucucagcgucc	chr1:173669685-173669765	Testes	SRR333678	2	2	0	0
JHU_ID_00827	JHU_ID_00827.5p		cuggagagggacggguugggac	ccuuuugcccuucccccuccgcg	cuggagagggacggguugggacgcacuguccuuuugcccuucccccuccgcg	chr1:173824252-173824304	B Cell Centroblast	SRR060981	45	45	0	0		Ago_1630				CENPL
JHU_ID_00828	JHU_ID_00828.3p	JHU_ID_00828.5p	aaccaaugauguaaugauucugcc	gugagucagcuuuugguacaug	gugagucagcuuuugguacaugugaugauuuucaguguaaccaaugauguaaugauucugcc	chr1:173864421-173864483	Cervical cancer	SRR1532965	323	320	0	3						GAS5
JHU_ID_00829	JHU_ID_00829.5p		uuggcugaugaauacugacu	acaguguuuauguguuuucc	uuggcugaugaauacugacuguauuuuccuugagcaugucuggaacaguguuuauguguuuucc	chr1:173865710-173865774	Lung squamous carcinoma	SRR1013975	29145	29144	1	0						GAS5
JHU_ID_00830	JHU_ID_00830.3p		acccccggagguaggugcu	gauuucacuuccgggacggugu	gauuucacuuccgggacgguguuccggcccauuccggcccauuuccacccccggagguaggugcu	chr1:173868350-173868415	Cervical cancer	SRR1304304	16	16	0	0						ZBTB37
JHU_ID_00831	JHU_ID_00831.5p		acggggucucacuugauugcuc	gcucaagagauccaccugucu	acggggucucacuugauugcucaggcuggucucaaacuccugggcucaagagauccaccugucu	chr1:173996996-173997060	Brain, Prefrontal Cortex	ERR409893	2	2	0	0
JHU_ID_00832	JHU_ID_00832.5p		acuguuggggaagaaaccuag	aucuucccuggcagcuu	acuguuggggaagaaaccuagggccuuugcauguuacucugaaugguaagacccuaucuucccuggcagcuu	chr1:174004812-174004884	Fibroblast Dermal (neonatal)	SRR5127225	2	2	0	0		Ago_1634
JHU_ID_00833	JHU_ID_00833.5p		gccugaggccuaaaggac	ccugaggagccuggggccg	gccugaggccuaaaggacgccggccacugacaagccccagaacagccggcgggggcccugaggagccuggggccg	chr1:174021884-174021959	Dendritic	SRR1708914	1	1	0	0
JHU_ID_00834	JHU_ID_00834.3p		cggcggcggcugccgcggc	gguggcggcggcagccgug	gguggcggcggcagccguggcccggcggccugggacagaaucagagucaacgguggccucggcggcggcggcggcugccgcggc	chr1:174022152-174022236	Lung	SRR372642	116	116	0	0
JHU_ID_00835	JHU_ID_00835.3p		ggggcgggccggagccuga	ccccuccgcccgccccgc	ccccuccgcccgccccgccuccugagggaggauccucgcccucgucuccgccccagucuccggggcgggccggagccuga	chr1:174022376-174022456	Fibroblast strain	SRR020286	2	2	0	0
JHU_ID_00838	JHU_ID_00838.5p	JHU_ID_00838.3p	auaguagaaugcaugauggauu	aauccaucaugcagucuacua	auaguagaaugcaugauggauuagagcaaagaagagugacuccauguucuuugcucuaauccaucaugcagucuacua	chr1:174137131-174137209	T cell leukemia	SRR1304307	16	15	0	1						RP11-160H22.5
JHU_ID_00839	JHU_ID_00839.5p	JHU_ID_00839.3p	guccauuuuacagagcgcugau	cugcgcccugcugauuggucc	cugcgcccugcugauugguccauuuuacagagcacugauugguccauuuuacagagcgcugau	chr1:174281250-174281313	Smooth Muscle Cell Aorta	SRR5127217	47	38	0	9		Ago_1637				RABGAP1L
JHU_ID_00840	JHU_ID_00840.3p		ugggaggcugaggguucagcaua	ugcccauccuuugggcugucggu	ugcccauccuuugggcugucggugcuguucuagaaucagagcaccugggaggcugaggguucagcaua	chr1:17435988-17436056	Platelet	SRR1592249	2	2	0	0
JHU_ID_00841	JHU_ID_00841.5p	JHU_ID_00841.3p	cuggaagggcaaaagacugc	agucuuuugcccuuucagcu	cuggaagggcaaaagacugcuacagcaggauguucagucuucagucuuuugcccuuucagcu	chr1:174397500-174397562	B Cell Centroblast	SRR060981	22	21	0	1
JHU_ID_00842	JHU_ID_00842.3p		cgugguggcgucaucacugg	gguggagacgucaccgcggu	gguggagacgucaccgcggucuaacaguuccgacgugguggcgucaucacugg	chr1:174999403-174999456	Plasma	SRR822437	2	2	0	0						CACYBP
JHU_ID_00843	JHU_ID_00843.5p		cucagggcucccucuggcuc	cccagagggcgguccgugcggu	cucagggcucccucuggcucccaggucacuccuguggccccagagggcgguccgugcggu	chr1:175044122-175044182	Breast adenocarcinoma	ERR227916	1	1	0	0
JHU_ID_00845	JHU_ID_00845.5p		cccugaggaguagguggccc	guuuggccugcuggguagaggag	cccugaggaguagguggcccccuggggccugugggguuuggccugcuggguagaggag	chr1:17532453-17532511	Plasma	SRR822445	1	1	0	0
JHU_ID_00846	JHU_ID_00846.5p/.3p		ggcggcggcggcgggacc	cggcgccgcgucgcgca	cggcgccgcgucgcgcacggcggcggcggcgggacc	chr1:17539691-17539727	Epithelium Colonic Epithelium (flow)	SRR5127219	287	287	0	0
JHU_ID_00847	JHU_ID_00847.3p		caggccugacuguagggggcau	ccccccuggagucgcugggauggcc	ccccccuggagucgcugggauggccuccgagagggagagcaggccugacuguagggggcau	chr1:17540557-17540618	Brain, Prefrontal Cortex	ERR409888	2	2	0	0						ARHGEF10L
JHU_ID_00848	JHU_ID_00848.3p		agaagaugcggacugggg	cuugcaauuaacuucaca	cuugcaauuaacuucacaaucugagaagaugcggacugggg	chr1:17568939-17568980	Skin	SRR2174509	3	3	0	0						ARHGEF10L
JHU_ID_00850	JHU_ID_00850.3p		ucccagauugccgcagaccuagu	uggguccgcagcgucuggaggaaa	uggguccgcagcgucuggaggaaaucuucaagauuucccagauugccgcagaccuagu	chr1:17592676-17592734	Fibroblast Dermal (adult)	SRR5127205	38	38	0	0						ARHGEF10L
JHU_ID_00851	JHU_ID_00851.5p	JHU_ID_00851.3p	cacugcugcuuggcuaugugcu	cacaagcugacagcaggggu	cacugcugcuuggcuaugugcugugugugcugugggcacaagcugacagcaggggu	chr1:17610656-17610712	Colon adenocarcinoma	SRR1917337	53	48	0	5						ARHGEF10L
JHU_ID_00852	JHU_ID_00852.5p/.3p		caggagcugcuugcacccuagga	cugggacguagcagggaacuccugag	cugggacguagcagggaacuccugagaaggagcuaccgggcggcucuaaccccacggggccccaggagcugcuugcacccuagga	chr1:17619152-17619237	Lung	SRR1216823	2	2	0	0	TJU_CMC_MD2.ID00070.5p-miR					ARHGEF10L
JHU_ID_00853	JHU_ID_00853.5p/.3p		cgcggucccucuccuccgagc	uggaggggagggagucacgau	cgcggucccucuccuccgagcgcccggcuggaggggagggagucacgau	chr1:176206976-176207025	Neuron iPSC	SRR1777166	11	11	0	0
JHU_ID_00854	JHU_ID_00854.5p	JHU_ID_00854.3p	cggaacgggaagaaggagcug	ggugcuuccgaaucgcgga	cggaacgggaagaaggagcugucucucucuucugagggguaggcaggugcuuccgaaucgcgga	chr1:176207669-176207733	Blood	SRR2201549	33	27	4	2	TJU_CMC_MD2.ID00240.5p-miR	Ago_1647				RP11-195C7.1
JHU_ID_00856	JHU_ID_00856.5p	JHU_ID_00856.3p	ucaccccgcccuccccggcagg	ugcaugagggcagguagggaga	ugcaugagggcagguagggagagaggcugcggccuggccugcggccucaccccgcccuccccggcagg	chr1:17622929-17622997	Biliosphere	ERR842904	13	11	0	2		Ago_350				ARHGEF10L
JHU_ID_00857	JHU_ID_00857.5p	JHU_ID_00857.3p	aaaugagucuguagaggagccu	gucaccucacagagucaccugu	aaaugagucuguagaggagccuguuuuuaaagcacaaggucaccucacagagucaccugu	chr1:17628366-17628426	Hepatocellular carcinoma (HepG2)	ERR738416	105	102	0	3		Ago_351				ARHGEF10L
JHU_ID_00859	JHU_ID_00859.5p		augggagagcuucagacuga	aguuaagggcuuuguugaugugg	augggagagcuucagacugaguuuuuccuuuguacucaguuaagggcuuuguugaugugg	chr1:176468249-176468309	H9 Differentiated Midbrain	SRR1988301	34	34	0	0						PAPPA2
JHU_ID_00860	JHU_ID_00860.3p		uaagggugugauucuggcugcuuc	cgcagcaucacucucucacu	cgcagcaucacucucucacuucagacgcaguaagggugugauucuggcugcuuc	chr1:176532670-176532724	Islet Beta Cell	SRR1028925	3	3	0	0						PAPPA2
JHU_ID_00861	JHU_ID_00861.5p	JHU_ID_00861.3p	ugcccccuccucugccaugg	guaagcagagagccagaggggcugg	guaagcagagagccagaggggcugggaccaccuccuugugcccccuccucugccaugg	chr1:176570729-176570787	Placenta	SRR567637	338	336	0	2		Ago_1651				PAPPA2
JHU_ID_00863	JHU_ID_00863.3p		uggagaagccugucuggacca	cauuagacccgggcuucccauc	cauuagacccgggcuucccauccuuggagaagccugucuggacca	chr1:17671679-17671724	Adrenal	SRR944040	2	2	0	0						ARHGEF10L
JHU_ID_00865	JHU_ID_00865.5p		aggcaugguauguauaugugugu	acacauauacauaccaugcauuu	aggcaugguauguauaugugugugucacacacauauacauaccaugcauuu	chr1:178096643-178096694	Retina	ERR973611	2	2	0	0						RASAL2
JHU_ID_00866	JHU_ID_00866.5p		uuggcucagggcugcaga	cuaagccaaaugaguccgaga	uuggcucagggcugcagagucagggggugcaguuguccucugggucacggcugggcucccuaagccaaaugaguccgaga	chr1:178486480-178486560	Embryonic kidney	SRR515902	3	3	0	0
JHU_ID_00867	JHU_ID_00867.5p		aacugccccucacucuguuguc	caggagugagaugcuguguuac	aacugccccucacucuguugucauuggccaccagguugacaggagugagaugcuguguuac	chr1:178530036-178530097	Cervical cancer	SRR1304304	4	4	0	0
JHU_ID_00868	JHU_ID_00868.5p		accaggcacugggcugca	ggguuuagauuugccuggaca	accaggcacugggcugcagcagcugaugaagcuugggugggcugaguuagucugcugagggguuuagauuugccuggaca	chr1:178585327-178585407	Brain, Prefrontal Cortex	ERR409887	2	2	0	0
JHU_ID_00869	JHU_ID_00869.5p		cccaccauggugggggaaagggacu	agcuuuugccauugcaguugggac	cccaccauggugggggaaagggacuugccuguuugggggaacccaugguaacaggacaagcuuuugccauugcaguugggac	chr1:178650861-178650943	Islet Alpha Cell	SRR1028924	8	8	0	0
JHU_ID_00870	JHU_ID_00870.3p		gcuggucugagaggauga	cucuagucagagagcug	cucuagucagagagcugcaaggaugugugcccaaggcagcuaugucuucaaagcuggucugagaggauga	chr1:178683522-178683592	Melanocyte	SRR1913137	148	148	0	0		Ago_1660
JHU_ID_00871	JHU_ID_00871.3p	JHU_ID_00871.5p	cgcgcucgcgggggcucugaga	gcggagccgcgcgcgcgcgcgca	gcggagccgcgcgcgcgcgcgcaccaacggagcgcgcucgcgggggcucugaga	chr1:178725112-178725166	Lung cancer	SRR1013983	450	449	0	1	TJU_CMC_MD2.ID00242.3p-miR	Ago_1661				RP11-428K3.1
JHU_ID_00872	JHU_ID_00872.5p		aggcugagggagaagggcg	cgccucccucggccgcg	aggcugagggagaagggcgcugggcggcgcgccucccucggccgcg	chr1:178725599-178725645	T cell leukemia	SRR1292461	2	2	0	0						RALGPS2
JHU_ID_00873	JHU_ID_00873.5p	JHU_ID_00873.3p	uuaguucuguggcaacaucga	uugauguugccauggaacuaau	uugauguugccauggaacuaauuuaaguuaaaaaaauuaguucuguggcaacaucga	chr1:178743555-178743612	Cervical cancer	SRR1304304	452	354	0	98		Ago_1662				RALGPS2
JHU_ID_00874	JHU_ID_00874.5p		aagccuggcugagcaacugacc	gcccuuguuccugccgggcuccu	aagccuggcugagcaacugaccuugagcaagcacugcagauggcccuuguuccugccgggcuccu	chr1:179091963-179092028	Smooth Muscle Cell, Coronary	SRR5127211	1	1	0	0						TOR3A
JHU_ID_00875	JHU_ID_00875.5p/.3p		ccggcugcucuccauccucugga	gggaggacgggggcagccuuggc	gggaggacgggggcagccuuggcuggagaaggccagcccggcugcucuccauccucugga	chr1:179108496-179108556	Neuroblastoma	SRR1304311	13	13	0	0						ABL2
JHU_ID_00877	JHU_ID_00877.5p		ccagggccugggcugggagggag	accggagcagcgccaggagcccgaggcc	ccagggccugggcugggagggagagaccggagcagcgccaggagcccgaggcc	chr1:179229457-179229510	Hepatocellular carcinoma	SRR609258	26	26	0	0
JHU_ID_00878	JHU_ID_00878.3p		auggcugaugaaugggaagcucu	cccuucccuuucagcagccuguca	cccuucccuuucagcagccugucagaggcugauggcugaugaaugggaagcucu	chr1:17923827-17923881	Brain, Prefrontal Cortex	ERR409893	7	7	0	0
JHU_ID_00879	JHU_ID_00879.5p/.3p		uagggcuggccgugggacgggcu	cugcugccgccauaagcugccccucu	uagggcuggccgugggacgggcuuguugaagcugcugccgccauaagcugccccucu	chr1:179816323-179816380	Thyroid	SRR1291267	3	3	0	0						RP11-12M5.3
JHU_ID_00880	JHU_ID_00880.5p	JHU_ID_00880.3p	cauugaucagaaguccagccu	ugccuggaucauucugaucaagau	ugccuggaucauucugaucaagauggcuacagauacauaagcauugaucagaaguccagccu	chr1:1798511-1798573	Lung Adenocarcinoma	SRR1013979	231	189	0	42	TJU_CMC_MD2.ID00019.3p-miR	Ago_77				GNB1
JHU_ID_00881	JHU_ID_00881.5p		aggcggagcuugcaguga	acugcaguccagccugg	aggcggagcuugcagugagccgagauagcgccacugcaguccagccugg	chr1:180055591-180055640	Skin	SRR2174517	9	9	0	0						CEP350
JHU_ID_00882	JHU_ID_00882.3p		ugccacccugcugucccggaca	ucugggagagcaccguggaaggu	ucugggagagcaccguggaagguuugugcugccacccugcugucccggaca	chr1:18007522-18007573	Brain, Prefrontal Cortex	ERR409879	2	2	0	0
JHU_ID_00883	JHU_ID_00883.5p		ugggggcugagagauguugaag	ucgccauccccccagccccccac	ugggggcugagagauguugaaggaguuugcccugcuccucgccauccccccagccccccac	chr1:180166147-180166208	Retina	ERR973613	2	2	0	0						QSOX1
JHU_ID_00884	JHU_ID_00884.5p		gggguagggcuggcaguggggugg	gccccgcaguagcagcagaggcaucgg	gggguagggcuggcagugggguggaggacagagggaagccagguaugccccgcaguagcagcagaggcaucgg	chr1:180187758-180187831	Myotube Skeletal Muscle	SRR1055961	1	1	0	0						QSOX1
JHU_ID_00885	JHU_ID_00885.5p		gcuccgucuucuggcuguuggcccc	cucaaacugcuagggcagagggagcug	gcuccgucuucuggcuguuggccccuuacucaaacugcuagggcagagggagcug	chr1:180194672-180194727	Dendritic	SRR1708915	2	2	0	0						QSOX1
JHU_ID_00886	JHU_ID_00886.5p		agaccccacugguuucuggcugg	ggcucagggaagccugugggguauga	agaccccacugguuucuggcugguccaguguggcggcucagggaagccugugggguauga	chr1:180250581-180250641	Breast adenocarcinoma	SRR873382	2	2	0	0						LHX4
JHU_ID_00887	JHU_ID_00887.3p		augcaucugggcuguggaaacg	uuucuggcuuagaggaaucu	uuucuggcuuagaggaaucuguuuggaaucaccuagcugcaaauuagucuggggaucagaugcaucugggcuguggaaacg	chr1:180255839-180255920	Retina	ERR973604	2	2	0	0						LHX4
JHU_ID_00888	JHU_ID_00888.5p	JHU_ID_00888.3p	auggaacgauacagagaag	uucgugaagcguucuauuuuuuu	auggaacgauacagagaagauuagcauggccccugacaugcaaguucgugaagcguucuauuuuuuu	chr1:180349157-180349224	Kidney	ERR038421	3	1	0	2						ACBD6
JHU_ID_00889	JHU_ID_00889.3p		acuguuggaaggguugcucgaagg	ugagcaugcuccucuuuuccaucugu	ugagcaugcuccucuuuuccaucuguguuguuuuuuaccccagcauacuguuggaaggguugcucgaagg	chr1:180561153-180561223	Colon adenocarcinoma	SRR1917329	3	3	0	0						OVAAL
JHU_ID_00890	JHU_ID_00890.5p		aucggguuaucuggcagcuc	gugguuggguacucagccuggcug	aucggguuaucuggcagcucagagcaguugcuuugccuggagugguuggguacucagccuggcug	chr1:180561498-180561563	Myoblast Skeletal Muscle	SRR5127218	2	2	0	0						OVAAL
JHU_ID_00891	JHU_ID_00891.5p		caggagaaagagacaggc	cuguauguugugccuggg	caggagaaagagacaggcaaaaaggaauaugugugcuaccaggaaggaggcgagaccacagaaaggaaauggcuguauguugugccuggg	chr1:180630362-180630452	Cervical cancer	SRR1532966	47	47	0	0
JHU_ID_00893	JHU_ID_00893.5p/.3p		uccagccccucccgcggccccac	ggggcuccgggcggggugggagg	ggggcuccgggcggggugggaggccgaggcccggcuccuccagccccucccgcggccccac	chr1:180912780-180912841	Mesangial	SRR5127221	9	9	0	0
JHU_ID_00894	JHU_ID_00894.3p		gggggcagguaagaagggg	cuuucacugcuugcccuccc	cuuucacugcuugcccucccugucuacggguugguggcacggggagggggcagguaagaagggg	chr1:180948633-180948697	Heart	ERR038426	1	1	0	0						RP11-46A10.5
JHU_ID_00895	JHU_ID_00895.3p		aaggcgggagcugggaggaagcu	aagccucccuucccccucgg	aagccucccuucccccucggcccgccgggcccggaaaggcgggagcugggaggaagcu	chr1:181105217-181105275	Coronary Endothelial Cell	SRR5127228	2	2	0	0
JHU_ID_00896	JHU_ID_00896.3p		agggggcugagguuuuggug	ccagaaccccagcuaggacucc	ccagaaccccagcuaggacucccuugccagaggcuggagggggcugagguuuuggug	chr1:181106824-181106881	Platelet	SRR1592247	5	5	0	0
JHU_ID_00897	JHU_ID_00897.3p		ucagccaugcccacugcccgcag	gugggagugaggaguaagggcaugggc	gugggagugaggaguaagggcaugggcgugguggggagugggccagcucagccaugcccacugcccgcag	chr1:181737455-181737525	Brain, Prefrontal Cortex	ERR409900	12	12	0	0						CACNA1E
JHU_ID_00898	JHU_ID_00898.5p		caggagaauggcuugaac	cagagcgagacucuguc	caggagaauggcuugaaccaggcagucggagguugcagugagccaagauugcaccacugcacuccaaccuggcgacagagcgagacucuguc	chr1:181841347-181841439	SkinDermis	SRR1259224	2	1	1	0
JHU_ID_00899	JHU_ID_00899.5p	JHU_ID_00899.3p	uaugaaguauccuaggcaaaua	uuugccuaggauacuucacauu	uuugccuaggauacuucacauuuucuauuaaaauaugaaguauccuaggcaaaua	chr1:181983227-181983282	Brain, Prefrontal Cortex	ERR409893	33	30	0	3		Ago_1684
JHU_ID_00900	JHU_ID_00900.5p		cggcgcccgccuugcgggcc	ccugcgggugaggggggcgaggcg	cggcgcccgccuugcgggccuccaggacccggccgccgccauccggugggaagccggguggccugcgggugaggggggcgaggcg	chr1:182029876-182029961	Placenta	SRR822459	1	1	0	0
JHU_ID_00901	JHU_ID_00901.5p		gcggcgccuggagagcgga	agugggucaggcgccgccc	gcggcgccuggagagcggagcaggcagcgcuuucugcccgcugagugggucaggcgccgccc	chr1:182030027-182030089	Neuron iPSC	SRR1777168	3	3	0	0
JHU_ID_00902	JHU_ID_00902.3p		acggucucgcuaggugca	agccugggucaggccuaa	agccugggucaggccuaagaaggucagagauugacuuaaaguuacggucucgcuaggugca	chr1:182121151-182121212	Colon adenocarcinoma	SRR1917324	2	2	0	0
JHU_ID_00903	JHU_ID_00903.5p	JHU_ID_00903.3p	ccucuccuaaccucgcucucgc	agagucgagagugggagaagagc	agagucgagagugggagaagagcggagcgugugagcaguacugcggccuccucuccucuccuaaccucgcucucgc	chr1:182391714-182391790	Macrophage	SRR1532975	1116	832	20	264	TJU_CMC_MD2.ID00247.3p-miR	Ago_1688				GLUL
JHU_ID_00904	JHU_ID_00904.5p/.3p		ccaaggccuggaagagccgcccg	ggccugggcuagggcgggu	ggccugggcuagggcgggugccgcgcgggccuggggacaggccgggguucccaaggccuggaagagccgcccg	chr1:182392351-182392424	Hepatocellular carcinoma (HepG2)	ERR738405	4	4	0	0
JHU_ID_00905	JHU_ID_00905.5p	JHU_ID_00905.3p	accuuggacucuacauucccca	ccaggaauguagagcucuggguu	accuuggacucuacauuccccaggcuuagagcucuggcccaggaauguagagcucuggguu	chr1:182674722-182674783	Fibroblast Cardiac	SRR5127236	9	2	0	7		Ago_1692
JHU_ID_00908	JHU_ID_00908.5p		ccccgcgcgggagucgcug	gagacuccggauugcgggaggag	ccccgcgcgggagucgcugggguccuugggcuccgcggccugggagacuccggauugcgggaggag	chr1:183022971-183023037	Neuron iPSC	SRR1777169	3	2	1	0	TJU_CMC_MD2.ID00248.5p-miR
JHU_ID_00910	JHU_ID_00910.5p/.3p		ucacgccugaggcugcagcugc	agcagcagcgugcaggcgccagg	agcagcagcgugcaggcgccaggcugucuggaaggcucacgccugaggcugcagcugc	chr1:183331625-183331683	Neuron Dopaminergic	SRR5127234	22	22	0	0						NMNAT2
JHU_ID_00912	JHU_ID_00912.3p		cgcgucggggcggggcgg	ucuuugccgugaguggg	ucuuugccgugagugggcggcgcgucggggcggggcgg	chr1:183470263-183470301	Cumulus Oophorus	ERR457737	10	10	0	0						SMG7-AS1
JHU_ID_00913	JHU_ID_00913.5p		gccuggaggcuggcgggc	gggcgaggcgacagcgcca	gccuggaggcuggcgggcggcgggcuggagucgggagggcgaggcgacagcgcca	chr1:183471434-183471489	Skin	SRR2174533	10	10	0	0						SMG7-AS1
JHU_ID_00914	JHU_ID_00914.5p		acacugcaagucggcuugg	cugccaacuugcagugaau	acacugcaagucggcuugguaugaagcucagcagcccugacuuugcugccaacuugcagugaau	chr1:18348798-18348862	Brain, Prefrontal Cortex	ERR409879	3	3	0	0
JHU_ID_00915	JHU_ID_00915.5p	JHU_ID_00915.3p	acagcccaggggccucuggcu	agccagaggccccugggcugug	agccagaggccccugggcuguguauuucaucacuaugagacacagcccaggggccucuggcu	chr1:183676690-183676752	B cell lymphoblastoid	SRR1304313	64	53	0	11		Ago_1699
JHU_ID_00916	JHU_ID_00916.3p		acagaguucuaaguucua	gaacagagcucaauua	gaacagagcucaauuaugcagaagacagagcuacauggagccuaacagaguucuaaguucua	chr1:183758870-183758932	SkinDermis	SRR1259216	6	6	0	0
JHU_ID_00917	JHU_ID_00917.5p		uguucuggaacgggguuggguc	cccuuucccugauuccuggc	uguucuggaacgggguugggucugcaggcucugacccuuucccugauuccuggc	chr1:18378198-18378252	BrainPrefrontalCortex	ERR409887	2	2	0	0		Ago_358
JHU_ID_00918	JHU_ID_00918.3p		aggacuggggugaagagguaga	uuucucuuuaucccgucccugg	uuucucuuuaucccgucccuggcagagcucgauucaggacuggggugaagagguaga	chr1:183806350-183806407	Prostate adenocarcinoma	SRR1810079	2	2	0	0
JHU_ID_00919	JHU_ID_00919.5p		uauggucccagugucgccucuag	agaggugacacugagaccauaac	uauggucccagugucgccucuagggucaccagcaucuagaggugacacugagaccauaac	chr1:183855681-183855741	Dendritic	SRR1708907	5	5	0	0
JHU_ID_00920	JHU_ID_00920.5p		ugcugggaaggcuggagugcagugg	acugcaaccucugccucccagguuc	ugcugggaaggcuggagugcaguggcgcaaucucagcucacugcaaccucugccucccagguuc	chr1:183897467-183897531	T cell leukemia	SRR1292463	13	13	0	0
JHU_ID_00921	JHU_ID_00921.3p		aggaguucugggcugcagugugc	accuguagucccagcuacuuggga	accuguagucccagcuacuugggaggcugaggcaggaggaucgcuugaggccaggaguucugggcugcagugugc	chr1:184353737-184353812	Platelet	SRR1592249	32	32	0	0
JHU_ID_00925	JHU_ID_00925.5p		uccgaggucgccagugguug	acccugucucggugg	uccgaggucgccagugguugcugggaucccaccucccccuuuccucggcgcccuacagucaacccugucucggugg	chr1:184755206-184755282	CD4+ T Cell	SRR1532972	3	3	0	0
JHU_ID_00926	JHU_ID_00926.3p		aucccagcggcuggccuccuu	agaggguggccgcuggggccc	agaggguggccgcuggggcccagagcuggcagaucccagcggcuggccuccuu	chr1:18480765-18480818	Colon adenocarcinoma	SRR1917331	125	125	0	0
JHU_ID_00929	JHU_ID_00929.3p		uguugcugguggugguguu	cauuauuacuaguuuugauggu	cauuauuacuaguuuugaugguggugguaucgguauuggugccaacauuguugcugguggugguguu	chr1:18801387-18801454	Plasma	SRR822445	1	1	0	0
JHU_ID_00931	JHU_ID_00931.5p	JHU_ID_00931.3p	uuucagaugguuucucuuuacc	uggggagacacuaucuggagga	uuucagaugguuucucuuuaccaguuuucucagaugcuggggagacacuaucuggagga	chr1:188410206-188410265	Biliosphere	ERR842917	6	3	0	3
JHU_ID_00932	JHU_ID_00932.5p		aaggacccucaggagcccauc	ugggcagccugggguccagag	aaggacccucaggagcccaucaugaaggaggugacuggggugggcagccugggguccagag	chr1:18876283-18876344	Plasma	SRR822445	2	2	0	0						ALDH4A1
JHU_ID_00933	JHU_ID_00933.5p		uaaaagacuacagaguucacu	ucaacuaaauagucuuuuaaa	uaaaagacuacagaguucacuggguuuuagacagucaacuaaauagucuuuuaaa	chr1:188877139-188877194	Lung squamous carcinoma	SRR1013975	38	38	0	0						RP11-316I3.2
JHU_ID_00935	JHU_ID_00935.3p		uugugccuuguacuuguaccuc	aauacaaguacaaggcacauau	aauacaaguacaaggcacauauauuuauuauuugugccuuguacuuguaccuc	chr1:188909470-188909523	Lung squamous carcinoma	SRR1013976	2	2	0	0						LINC01035
JHU_ID_00936	JHU_ID_00936.5p		ccgcggggcgcgagcguggggaagg	gaagccgggccgcgcgccgcgguc	ccgcggggcgcgagcguggggaaggggaacaaugaaauggggaagccgggccgcgcgccgcgguc	chr1:1890277-1890342	Platelet	SRR1592249	1	1	0	0						GNB1
JHU_ID_00937	JHU_ID_00937.5p		acugccccgguccccaucccgcccg	ggccgccgggggucucccggggcagcgg	acugccccgguccccaucccgcccgguccccgcagggccgggccgccgggggucucccggggcagcgg	chr1:1891255-1891323	Platelet	SRR1592247	4	4	0	0
JHU_ID_00938	JHU_ID_00938.5p		ggggaugagcuguguggg	cucaccugacauuccccc	ggggaugagcuguguggggucaucacauucccccaccugacauuccccucaccugacauuccccc	chr1:18929524-18929589	SkinDermis	SRR1259218	9	9	0	0						IFFO2
JHU_ID_00939	JHU_ID_00939.5p		ugggcugugggagauauucug	gggugucuccagaaacacccaac	ugggcugugggagauauucugggcugccgggccugggugucuccagaaacacccaac	chr1:18932935-18932992	Lung	SRR1608271	1	1	0	0						IFFO2
JHU_ID_00940	JHU_ID_00940.3p		uggacacuggcuucuuuuccu	ggagagacuccaaggcccugu	ggagagacuccaaggcccuguuuacuuuacccuacuggacacuggcuucuuuuccu	chr1:18939974-18940030	Colon adenocarcinoma	SRR1917329	115	115	0	0		Ago_361				IFFO2
JHU_ID_00941	JHU_ID_00941.3p		agaggacagagcacuuggagcagag	ugagcucagggcucccucugg	ugagcucagggcucccucugggggcugcuggcacuuucaggagggguuuggaaaacucccagaggacagagcacuuggagcagag	chr1:18943933-18944018	Brain, Frontal Cortex	SRR553572	6	4	2	0						IFFO2
JHU_ID_00942	JHU_ID_00942.5p	JHU_ID_00942.3p	aacccgagaguuggagcuugcag	gcacuccagccugggcgau	aacccgagaguuggagcuugcagugagccgagaucgugccacugcacuccagccugggcgau	chr1:189503667-189503729	Lung	SRR372626	2	1	0	1
JHU_ID_00943	JHU_ID_00943.3p		cuagcugccuaucagacaggg	cugggcugguagaggaaguugccc	cugggcugguagaggaaguugcccggcgcuaguagugcuggccuagcugccuaucagacaggg	chr1:18951552-18951615	Adrenal	SRR944031	2	2	0	0						IFFO2
JHU_ID_00944	JHU_ID_00944.5p		uuuggggaagcaaguggg	cagcuuccuccaggug	uuuggggaagcaagugggggucucuggagcugcagcuuccuccaggug	chr1:18952995-18953043	H9 Differentiated Midbrain	SRR1988299	2	2	0	0						IFFO2
JHU_ID_00945	JHU_ID_00945.3p		acaguaggaggcaguguagc	uacacuacacugccuccuacugucu	uacacuacacugccuccuacugucucugcucauacaaauauagacaguaggaggcaguguagc	chr1:190373881-190373944	Testes	SRR333680	25	25	0	0		Ago_1717
JHU_ID_00946	JHU_ID_00946.5p	JHU_ID_00946.3p	ucacucuaggguuggggacagu	ugcccugacuucagagcuugaag	ugcccugacuucagagcuugaaggugaacucugaccccuucacucuaggguuggggacagu	chr1:19068657-19068718	Colon adenocarcinoma	SRR1917329	342	335	0	7		Ago_364
JHU_ID_00947	JHU_ID_00947.3p		gccagcagcucagggcug	ucccuggcugcaggcca	ucccuggcugcaggccaggggugcuugccagcagcucagggcug	chr1:19075258-19075302	Biliosphere	ERR842911	1	1	0	0						UBR4
JHU_ID_00948	JHU_ID_00948.3p		gccgcgcggacucggggc	cccgccccgcgucggaag	cccgccccgcgucggaagcuccgcgcuuucccaccagacggcgcucgcaggccgcgcggacucggggc	chr1:1909106-1909174	Biliosphere	ERR842906	2	2	0	0
JHU_ID_00949	JHU_ID_00949.5p		gaccagcuuugaacccuuccccuua	aggggcaggggagagacucuc	gaccagcuuugaacccuuccccuuaaacaugcuccuccugcacggaagagacaggggcaggggagagacucuc	chr1:191560-191633	Testes	SRR333688	4	4	0	0
JHU_ID_00950	JHU_ID_00950.5p	JHU_ID_00950.3p	ugguaauuauuuggaaaaauag	auuuuuccaaauaauuacc	ugguaauuauuuggaaaaauaguauuaaguuuuauaauacuauuuuuccaaauaauuacc	chr1:192545766-192545826	Lung	SRR372640	7	6	0	1		Ago_1725
JHU_ID_00951	JHU_ID_00951.5p	JHU_ID_00951.3p	uccggaggugaagggagaaccca	gcucucccugagccuccggccu	uccggaggugaagggagaacccagagcuuuaagccaggcccugcucucccugagccuccggccu	chr1:19257234-19257298	Dendritic	SRR1708910	5	4	0	1						MRTO4
JHU_ID_00952	JHU_ID_00952.3p		ucugcggccccggcuucuugc	ucgaagccggggcgcugcu	ucgaagccggggcgcugcugacgucugcggccccggcuucuugc	chr1:192808836-192808880	Smooth Muscle Cell Prostate	SRR5127222	3	3	0	0		Ago_1726
JHU_ID_00953	JHU_ID_00953.5p		ccugagggauguggcagcuucugg	ggggcugauugcugcuuucccucagggg	ccugagggauguggcagcuucuggggcacucuaggccccggggcugauugcugcuuucccucagggg	chr1:19284782-19284849	Hepatocellular carcinoma (HepG2)	ERR738404	1	1	0	0						AKR7A3
JHU_ID_00955	JHU_ID_00955.5p		agagacauggaggacuggucaga	cagccggccucccgcaauguccuca	agagacauggaggacuggucagaauuugcgcgucccuggggccgcacaaaaggcucccagccggccucccgcaauguccuca	chr1:193059777-193059859	Smooth Muscle Cell, Coronary	SRR5127211	2	2	0	0						TROVE2
JHU_ID_00956	JHU_ID_00956.5p		uaggacuuagugauccggag	ugggguugggguuggggu	uaggacuuagugauccggagaagcccuuuugaaagaguggggcucuugggguugggguuggggu	chr1:193121479-193121543	Melanoma	SRR1913138	86	86	0	0		Ago_1731
JHU_ID_00957	JHU_ID_00957.5p	JHU_ID_00957.3p	ccuguucguaaauguuagugga	uaacguuuaugaacagucagga	ccuguucguaaauguuaguggauuauuacauuacauugcacuaacguuuaugaacagucagga	chr1:193157267-193157330	Adrenal	SRR944034	142	138	0	4	TJU_CMC_MD2.ID00251.5p-miR	Ago_1733
JHU_ID_00958	JHU_ID_00958.5p		aggccgugggacuuaagugcac	gugccaacuuaaggcccacgacucg	aggccgugggacuuaagugcaccagucuggucugugugugccaacuuaaggcccacgacucg	chr1:19341760-19341822	Smooth Muscle Cell, Coronary	SRR5127211	2	2	0	0						CAPZB
JHU_ID_00959	JHU_ID_00959.3p		ucuccccuaagcucugucaucccga	ggggcaguaaacggcuguggagggagcac	ggggcaguaaacggcuguggagggagcacuggccuuggagucaggagagucaggaggccgggaucuccccuaagcucugucaucccga	chr1:19343574-19343662	Dendritic	SRR1708917	2	2	0	0						CAPZB
JHU_ID_00960	JHU_ID_00960.3p		acugcucaggcgcuggcucuggg	cacccccagaccugggcuccca	cacccccagaccugggcucccagaagacugcucaggcgcuggcucuggg	chr1:19344926-19344975	Epithelium Colonic Epithelium (flow)	SRR5127219	2	2	0	0						CAPZB
JHU_ID_00962	JHU_ID_00962.5p		agcucagcuagaguggagggc	ccuuugcucuggcugagugaa	agcucagcuagaguggagggcugcuuccuuugcucuggcugagugaa	chr1:19369920-19369967	BladderEpithelium	DRR013038	1	1	0	0		Ago_373				CAPZB
JHU_ID_00963	JHU_ID_00963.5p		gaggccaucgccuggcuguaggcg	gcuggcuggccggcugcag	gaggccaucgccuggcuguaggcggcagcuucuccugccggcuggcuggccggcugcag	chr1:19395865-19395924	BrainFrontal	SRR448331	1	1	0	0						CAPZB
JHU_ID_00964	JHU_ID_00964.5p		cagaggcuaucaaugcccagg	uggguaauccagcccucauggc	cagaggcuaucaaugcccagguggaauucuggggacagggcaagaagcucucccugccuggguaauccagcccucauggc	chr1:194114334-194114414	T cell leukemia	SRR1532969	2	2	0	0
JHU_ID_00965	JHU_ID_00965.5p		aggcaggcgggagggucaggccc	guggcacuuucccuaccacaccuuc	aggcaggcgggagggucaggcccgugggguggcacuuucccuaccacaccuuc	chr1:19459029-19459082	Fibroblast Periodonal ligament	SRR5127227	1	1	0	0
JHU_ID_00966	JHU_ID_00966.5p		aaaggcugagagaccuggccu	gccaggauucaaagccauagauca	aaaggcugagagaccuggccuagugacagagccaggauucaaagccauagauca	chr1:194605-194659	Retina	ERR973603	41	41	0	0
JHU_ID_00967	JHU_ID_00967.5p		ccgcugccucccucuguccc	gucagccccuucugcagcggcc	ccgcugccucccucugucccucccccuuugccuucuccauggccucaggcuggaccccggucagccccuucugcagcggcc	chr1:19484912-19484993	Skin	SRR2174513	2	2	0	0
JHU_ID_00968	JHU_ID_00968.3p	JHU_ID_00968.5p	ggcggcggcccggcgcggg	cgggccgggccggggcggggaa	cgggccgggccggggcggggaaggaagguggcggcggcccggcgcggg	chr1:19485560-19485608	Kidney	ERR038421	11	10	0	1	TJU_CMC_MD2.ID00073.3p-miR
JHU_ID_00969	JHU_ID_00969.5p	JHU_ID_00969.3p	aggcagguggauuguugg	agcgauccaccugccucg	aggcagguggauuguuggaguccaggagaccaacaugagauuuggauggggauggacuccagcgauccaccugccucg	chr1:19512080-19512158	Testes	SRR333680	122	109	0	13	TJU_CMC_MD2.ID00074.3p-miR
JHU_ID_00972	JHU_ID_00972.5p		auuccuuccuuuuugcca	gcauaaagggaguggagu	auuccuuccuuuuugccacucacaagcaguggcauaaagggaguggagu	chr1:197515143-197515192	iPSC-CM	SRR1542718	22	22	0	0						DENND1B
JHU_ID_00975	JHU_ID_00975.3p		ucgcugcguggggucgguu	ccggucuugggcagcucgu	ccggucuugggcagcucguggccaucgcugcguggggucgguu	chr1:197902527-197902570	Thyroid	SRR1291269	3	3	0	0
JHU_ID_00976	JHU_ID_00976.3p		agcugcacagaacacgcgugugg	acacgcgugugguacugagcugg	acacgcgugugguacugagcugggcgugggaaggcgucacgugaugaagcugcacagaacacgcgugugg	chr1:1979412-1979482	Retina	ERR973617	2	2	0	0						CFAP74
JHU_ID_00977	JHU_ID_00977.3p		cucccaggccugccauacugcug	gcuuguggcaggugugggaagu	gcuuguggcaggugugggaagugugggagaugcuguaugcauggcagucuccacaccuucucuccucccaggccugccauacugcug	chr1:198127635-198127722	Lung squamous carcinoma	SRR1013976	2	2	0	0
JHU_ID_00978	JHU_ID_00978.3p	JHU_ID_00978.5p	uuucuuugucuaguaguuuuca	aaaacuacuagacaaagaaac	aaaacuacuagacaaagaaacauaugaguaaguuuugguauguuucuuugucuaguaguuuuca	chr1:198161822-198161886	Hepatocellular carcinoma	SRR2085171	3	2	0	1						NEK7
JHU_ID_00979	JHU_ID_00979.3p		ucggaguggcaguaggaaggaa	ccuccuacugacucaccaacc	ccuccuacugacucaccaaccaggaaaggucggaguggcaguaggaaggaa	chr1:198234571-198234622	T cell leukemia	SRR1292461	7	7	0	0		Ago_1754				NEK7
JHU_ID_00980	JHU_ID_00980.3p		uggcgaagacugcagugacuuu	aguuuauugcgguuuuugccauu	aguuuauugcgguuuuugccauuuaaaaguaauggcgaagacugcagugacuuu	chr1:198834384-198834438	T cell leukemia	SRR1292461	9	9	0	0						MIR181A1HG
JHU_ID_00982	JHU_ID_00982.3p	JHU_ID_00982.5p	uuggagcugaggcuguggccacu	ucagccacacucagcucuaaca	ucagccacacucagcucuaacaaaguccuuuugaagcaguuggagcugaggcuguggccacu	chr1:199082989-199083051	Brain, Prefrontal Cortex	ERR409878	5	4	0	1	TJU_CMC_MD2.ID00253.5p-miR	Ago_1759
JHU_ID_00983	JHU_ID_00983.3p	JHU_ID_00983.5p	uaauguaguugccacuaggaga	uuuuaguggcaacagcuuugaa	uuuuaguggcaacagcuuugaacuagagagguagauguauuaaagcagcauagaaccauaacuucuagauaauguaguugccacuaggaga	chr1:19910423-19910514	Colon adenocarcinoma	SRR1917335	78	74	2	2	TJU_CMC_MD2.ID00078.3p-miR					OTUD3
JHU_ID_00984	JHU_ID_00984.5p	JHU_ID_00984.3p	augaauacuuuugaaucuugcuga	aagcaugacugaaguauucaga	augaauacuuuugaaucuugcugaacagguauaaucguuuaagcaugacugaaguauucaga	chr1:199124196-199124258	T cell leukemia	SRR1292461	17	13	0	4		Ago_1760
JHU_ID_00985	JHU_ID_00985.5p	JHU_ID_00985.3p	aggucuguuugcaauuguacac	guacaauugcaaacagaccuga	aggucuguuugcaauuguacaccccagaguugggguuggguacaauugcaaacagaccuga	chr1:199682993-199683054	Neuron iPSC	SRR1777164	5	3	0	2
JHU_ID_00986	JHU_ID_00986.3p		gcaggaugaaggccuucg	gagugcugacaucagcga	gagugcugacaucagcgagagaaacaggcagagugcaaugcaggguaucacauggcaggaugaaggccuucg	chr1:199693464-199693536	Plasma	SRR822447	8	8	0	0
JHU_ID_00987	JHU_ID_00987.3p		ucuugggcuccugcugcgcgcagc	cgcgcgcucgggggcucgcgccc	cgcgcgcucgggggcucgcgcccgcgcgggcggucuugggcuccugcugcgcgcagc	chr1:200029230-200029287	Islet Beta Cell	SRR1028925	10	10	0	0						NR5A2
JHU_ID_00988	JHU_ID_00988.3p		aagccccggaggcugaccu	gucauccuggggucucc	gucauccuggggucuccccaagccucuagguagggcugugagaguccccuagagcugaagccccggaggcugaccu	chr1:200040909-200040985	Lung	SRR1608275	1	1	0	0						NR5A2
JHU_ID_00989	JHU_ID_00989.5p	JHU_ID_00989.3p	auacuuccgacugugaauuc	ucacagccggaaguaucucau	auacuuccgacugugaauucccgacuuuagcuugcuggccaagcuccucuacaugaauucacagccggaaguaucucau	chr1:20033843-20033922	Placenta	SRR567644	17	11	0	6
JHU_ID_00990	JHU_ID_00990.5p		cccugccgccgucgccgcugccgu	ggcgaaggugguggccgggga	cccugccgccgucgccgcugccgucucccgggucuuccucccuugcugacggcgaaggugguggccgggga	chr1:200739058-200739129	BladderEpithelium	DRR013038	1	1	0	0
JHU_ID_00992	JHU_ID_00992.5p		aggauucuagaacuucugcauau	uugccugagguuuuaaaauccuca	aggauucuagaacuucugcauauuggaauuccagcugccuugccugagguuuuaaaauccuca	chr1:200894366-200894429	Neuron Dopaminergic	SRR5127234	11	11	0	0						C1orf106
JHU_ID_00994	JHU_ID_00994.5p		agucugggcagguggagagga	cucugcuuccuccccaggagcu	agucugggcagguggagaggaccuggcuggucucugcuuccuccccaggagcu	chr1:200900056-200900109	Biliosphere	ERR842903	1	1	0	0		Ago_1772				C1orf106
JHU_ID_00995	JHU_ID_00995.3p		guggaauuuaagugggagugaa	gacuccuacugcaagaccaugg	gacuccuacugcaagaccaugggguuugggcaguuugcugguguggaauuuaagugggagugaa	chr1:200907924-200907988	Kidney	ERR038421	3	3	0	0						C1orf106
JHU_ID_00996	JHU_ID_00996.5p		ugagguaggagguguaugg	uucuuccuccuccucuuc	ugagguaggagguguauggauauucuucuucuucuucuucuuccuccuccucuuc	chr1:20093127-20093182	BladderEpithelium	DRR013036	15	15	0	0
JHU_ID_00997	JHU_ID_00997.5p	JHU_ID_00997.3p	cacagacagagagggcuaaggug	cccagcccucuucugucucccac	cacagacagagagggcuaaggugccugaguguggagcccagcccucuucugucucccac	chr1:200991727-200991786	T cell leukemia	SRR1292461	108	101	0	7	TJU_CMC_MD2.ID00254.3p-miR	Ago_1775				KIF21B
JHU_ID_00998	JHU_ID_00998.3p		ucuucccacugccaccucuaga	ugggauuggcacagugaggaga	ugggauuggcacagugaggagaagcugauguucucuucccacugccaccucuaga	chr1:201021569-201021624	Neural Stem Cell	SRR1988281	1	1	0	0						KIF21B
JHU_ID_00999	JHU_ID_00999.5p		cugggggaagggccucagcu	cuggggcuccaaccccaguc	cugggggaagggccucagcucaggacaagagcuggggcuccaaccccaguc	chr1:201026333-201026384	Adrenal	SRR944031	3	3	0	0						RP11-168O16.1
JHU_ID_01000	JHU_ID_01000.3p		cucaccaggcgacaaggcu	uguuaccugaguaagau	uguuaccugaguaagauugagauucucucaccaggcgacaaggcu	chr1:201170979-201171024	Dendritic	SRR1708908	2	2	0	0						TMEM9
JHU_ID_01001	JHU_ID_01001.3p		uccugaggucugaaaaaggagc	cucuuuuucagcaacuuccggaag	cucuuuuucagcaacuuccggaaguccaucagcuccuuccugaggucugaaaaaggagc	chr1:201199595-201199654	Colon adenocarcinoma	SRR1917324	65	65	0	0						IGFN1
JHU_ID_01002	JHU_ID_01002.5p	JHU_ID_01002.3p	augccuagacugcaccccagacu	ugggguggcaucuaggugc	augccuagacugcaccccagacuaauuaaaucagaaucucugggguggcaucuaggugc	chr1:201220806-201220865	Cervical cancer	SRR1532965	97	90	1	6						IGFN1
JHU_ID_01003	JHU_ID_01003.3p		ucugccuccuggcugaggacugg	ucuccccuccauggcaggugagu	ucuccccuccauggcaggugaguugaggcucugccuccuggcugaggacugg	chr1:201300456-201300508	Nasopharyngeal epithelial cell	SRR1564522	1	1	0	0						PKP1
JHU_ID_01004	JHU_ID_01004.5p		aauccaguggguguagccuuccc	gaggagcuguucccagggguauu	aauccaguggguguagccuucccuccucuggaggagaggagcuguucccagggguauu	chr1:201316349-201316407	Placenta	SRR822458	1	1	0	0						PKP1
JHU_ID_01005	JHU_ID_01005.5p		ugccucugggaccacugcaacagcc	cugugcucccagggacacagaagcauc	ugccucugggaccacugcaacagccucagccagucucagagacaagggcuaggccugugcucccagggacacagaagcauc	chr1:201328894-201328975	Skin	SRR2174525	3	3	0	0						PKP1
JHU_ID_01006	JHU_ID_01006.3p		ucugcuucccacacccuccaga	gggaggguuaggggacaggga	gggaggguuaggggacagggagggggcaaucuggccaguuuacucugcuucccacacccuccaga	chr1:201362021-201362086	iPSC-CM	SRR1542718	9	9	0	0						TNNT2
JHU_ID_01008	JHU_ID_01008.5p		gcugagacugagcagacgcc	uaaggcucgggcagggcuc	gcugagacugagcagacgccuccaggaucugucggcagcugcuguucugagguaaggcucgggcagggcuc	chr1:201377602-201377673	Heart	ERR038427	7	6	1	0						TNNT2
JHU_ID_01009	JHU_ID_01009.5p/.3p		gaggcugaagggugugaugaug	uaagugcagcauauucagucugcu	uaagugcagcauauucagucugcucagggaguuggggcccaggaaaugaggcugaagggugugaugaug	chr1:201389036-201389105	Bladder	DRR013043	32	32	0	0						LAD1
JHU_ID_01010	JHU_ID_01010.3p		ccucccaggcucccaggcuuu	ggcucuggggcuugaagguc	ggcucuggggcuugaaggucaauguugcaugggccacgggguuuccccaaaccucugcccucccaggcucccaggcuuu	chr1:201396036-201396115	Blood	SRR1949841	1	1	0	0						LAD1
JHU_ID_01011	JHU_ID_01011.3p		acaaggccucugaccagggca	ccucacuggucaccaggccagucc	ccucacuggucaccaggccaguccggggagaaaaggacaaggccucugaccagggca	chr1:201396974-201397031	Hepatocellular carcinoma (HepG2)	ERR738406	16	16	0	0		Ago_1779				LAD1
JHU_ID_01013	JHU_ID_01013.5p		cgugacccugagcuucaggag	ccugagcucucaggugucacuuc	cgugacccugagcuucaggagaggcugauuuccugagcucucaggugucacuuc	chr1:201502454-201502508	Skin	SRR2174513	6	6	0	0						CSRP1
JHU_ID_01014	JHU_ID_01014.5p		ccgggccgaggaaguggc	cagucaaggccccgggug	ccgggccgaggaaguggcggcucucaggcccagcugggggcagggucagucaaggccccgggug	chr1:20153193-20153257	Skin	SRR2174517	4	4	0	0
JHU_ID_01015	JHU_ID_01015.3p		cuccuccuuagaagcuccagugac	cacugugcuucagaggaggaaguc	cacugugcuucagaggaggaagucagaagcugccucggacuccuccuuagaagcuccagugac	chr1:201535886-201535949	SkinDermis	SRR1259216	2	2	0	0
JHU_ID_01018	JHU_ID_01018.5p		ugcgccgccggagccuccga	ggaguggguguguggagg	ugcgccgccggagccuccgagcuccuggacguuuggcuuacgggcaucuggggcugggaguggguguguggagg	chr1:201740260-201740334	Thyroid	SRR1658402	1	1	0	0
JHU_ID_01019	JHU_ID_01019.5p/.3p		uccgaucucagaaaggcaggcag	gccugccuuucugagauugggag	uccgaucucagaaaggcaggcaggccaaaaauuccugccugccuuucugagauugggag	chr1:201750735-201750794	Immort. Mammary Epi	SRR433866	14	14	0	0
JHU_ID_01020	JHU_ID_01020.3p		uggcuguguccuggacccg	aguugggcacugcggccagg	aguugggcacugcggccagggaagccuggcuguguccuggacccg	chr1:201888627-201888672	Neuron iPSC	SRR1777169	4	4	0	0
JHU_ID_01021	JHU_ID_01021.5p/.3p		ccggcuugguccugcggucccuuc	aggcggaagaggagcccgagccuggcc	aggcggaagaggagcccgagccuggccgcgggcugggccccgccgcagcuccagcuggccggcuugguccugcggucccuuc	chr1:201888875-201888957	Astrocytes	SRR5127214	985	985	0	0	TJU_CMC_MD2.ID00257.3p-miR	Ago_1790				SHISA4
JHU_ID_01022	JHU_ID_01022.5p		acaguagguauaagagcu	uucaugccuguaaucc	acaguagguauaagagcuugguuaggccgggugccgugguucaugccuguaaucc	chr1:201940453-201940508	Retina	ERR973613	2	2	0	0
JHU_ID_01023	JHU_ID_01023.5p		uggccugugcucugucuugag	caucucaggagugcugggccagg	uggccugugcucugucuugagcucuccucugcccauuucugcucaucucaggagugcugggccagg	chr1:201951453-201951519	Coronary Endothelial Cell	SRR5127228	2	2	0	0
JHU_ID_01024	JHU_ID_01024.3p		ccggccugugaucccagcauuuu	agugcuaggauuaaaggcgugag	agugcuaggauuaaaggcgugagccaccaugcccggccugugaucccagcauuuu	chr1:201975543-201975598	Epithelium Intestinal	SRR5127223	1	1	0	0
JHU_ID_01027	JHU_ID_01027.5p		cuccuccucccaccuguu	caguggggggcaauuga	cuccuccucccaccuguuuguccaccugaguagaauacaauuucugugucugagcaguggggggcaauuga	chr1:202107595-202107666	Colon adenocarcinoma	SRR1917331	3	3	0	0
JHU_ID_01028	JHU_ID_01028.5p	JHU_ID_01028.3p	acggggggaugggcaggaggagg	uccagccuaccucccuggacaga	acggggggaugggcaggaggaggaaggaaacaccuccagccuaccucccuggacaga	chr1:202160002-202160059	T cell leukemia	SRR1292463	19	13	0	6						PTPN7
JHU_ID_01032	JHU_ID_01032.3p		ucucccaccggccuguggggcu	ccccacaggccugugaaaaggc	ccccacaggccugugaaaaggcaccagccccucucccaccggccuguggggcu	chr1:202223834-202223887	Platelet	SRR1592244	1	1	0	0						LGR6
JHU_ID_01034	JHU_ID_01034.3p		aucccucugcccccucacc	ggagggugugcugaggggcuugc	ggagggugugcugaggggcuugccuggcgggggcaucccucugcccccucacc	chr1:202623102-202623155	Hepatocellular carcinoma (HepG2)	ERR738414	1	1	0	0
JHU_ID_01035	JHU_ID_01035.5p		ccccaggacagcugccug	gggagauguuguggggug	ccccaggacagcugccuguggguuugggagauguuguggggug	chr1:202623459-202623502	Epithelium Retinal Pigment	SRR5127210	2	2	0	0
JHU_ID_01036	JHU_ID_01036.5p		agaggugggugccggggg	agcggcauauuucauuucauc	agaggugggugccgggggcagggagggagaccuccacugugcccacuccgugccagcggcauauuucauuucauc	chr1:202628083-202628158	Breast adenocarcinoma	SRR029054	1	1	0	0
JHU_ID_01037	JHU_ID_01037.5p		gguagggauuucugacgcag	ggucuguggcucugcugc	gguagggauuucugacgcagggaggggacacgguggcuaggccuggcuggcuuccuggucuguggcucugcugc	chr1:202658351-202658425	Testes	SRR333676	2	2	0	0
JHU_ID_01038	JHU_ID_01038.3p		agcccagacauggcacggauugau	gggucugugcccugccuggggagc	gggucugugcccugccuggggagccgggccauggagcccagacauggcacggauugau	chr1:2027844-2027902	Brain, Prefrontal Cortex	ERR409898	2	2	0	0						GABRD
JHU_ID_01039	JHU_ID_01039.5p/.3p		ccugggugcaguguggugg	gcccagcgggcccgggcc	gcccagcgggcccgggcccccgaggggcagcgccgggcgcgggccugggugcaguguggugg	chr1:202808234-202808296	Plasma	SRR822438	88	88	0	0						KDM5B
JHU_ID_01040	JHU_ID_01040.5p/.3p		ugccggggccggagcucccaga	ugggugcgaggccuaggcggg	ugccggggccggagcucccagagggcugggugcgaggccuaggcggg	chr1:202810987-202811034	Cervical cancer	SRR1304304	575	575	0	0
JHU_ID_01041	JHU_ID_01041.3p		auuccggcucucggagcucccg	ggugcuccgcgggcgcguggaagg	ggugcuccgcgggcgcguggaagggaggcgccccauuccggcucucggagcucccg	chr1:202888602-202888658	Cervical cancer	SRR1304304	140	140	0	0		Ago_1801				RABIF
JHU_ID_01042	JHU_ID_01042.3p		uggcagugggguggggca	cccuaccccccauc	cccuaccccccauccuuggucucccugcaaggcggaaugggagacaugcccaacagaggaggaaggcuggcagugggguggggca	chr1:202926939-202927024	Neuron iPSC	SRR1777161	2	2	0	0						KLHL12
JHU_ID_01043	JHU_ID_01043.3p		gagccuccgggucugggcggc	gggccagacccggacggcucca	gggccagacccggacggcuccagagccuccagagccuccgggucugggcggc	chr1:202927187-202927239	Blood	SRR2201548	1	1	0	0						KLHL12
JHU_ID_01044	JHU_ID_01044.3p	JHU_ID_01044.5p	ucugucccuggcucccuuccuuc	agcuagggggcuugggucauagagg	agcuagggggcuugggucauagaggauggguguuagaguaccuuucugucccuggcucccuuccuuc	chr1:203052684-203052751	BrainPrefrontalCortex	ERR409891	56	55	0	1		Ago_1804				PPFIA4
JHU_ID_01045	JHU_ID_01045.5p		uucucucugagccuuguagc	uuggggcucuggguuuccu	uucucucugagccuuguagcccacuuguguuuggggcucuggguuuccu	chr1:203058810-203058859	Retina	ERR973615	2	2	0	0						PPFIA4
JHU_ID_01047	JHU_ID_01047.5p	JHU_ID_01047.3p	cacccaccugcccuuucuugcu	caagaaaggguagguggguggg	cacccaccugcccuuucuugcuccaccagcaggagagcaagaaaggguagguggguggg	chr1:203175129-203175188	Myoblast Skeletal Muscle	SRR5127218	85	80	0	5		Ago_1808				MYBPH
JHU_ID_01048	JHU_ID_01048.3p		acgggcugccucccacccuucu	cugggugggggcagccagggugc	cugggugggggcagccagggugcuguuuccaggcacgggcugccucccacccuucu	chr1:203277364-203277420	Mesangial	SRR5127221	1	1	0	0
JHU_ID_01049	JHU_ID_01049.5p		gccucugagcugggagguccu	gcccuccugccucagagaaca	gccucugagcugggagguccuggccaaagaaaugcccuccugccucagagaaca	chr1:203286120-203286174	Skin	SRR2174529	5	5	0	0
JHU_ID_01051	JHU_ID_01051.5p		gggagcagcuuugggacucgg	caguccccaguuuccug	gggagcagcuuugggacucgguggcccuccuccgacccccggggcggcccgcaguccccaguuuccug	chr1:203305842-203305910	Blood	SRR2201550	1	1	0	0						BTG2
JHU_ID_01052	JHU_ID_01052.3p		aaccuccugaugcccuggugg	cccugggucccaggagggucu	cccugggucccaggagggucuggaggaaaacuggcuaucagaaccuccugaugcccuggugg	chr1:203308509-203308571	Plasma	SRR822438	2	2	0	0						BTG2
JHU_ID_01053	JHU_ID_01053.5p		ugggggagcagaaggaaggag	ccuccuucuccuccuccucc	ugggggagcagaaggaaggaggguccagccaccaggagcucuuccuccuccuucuccuccuccucc	chr1:20342319-20342385	BrainPrefrontalCortex	SRR1759220	5	5	0	0
JHU_ID_01055	JHU_ID_01055.5p		acuggccacagaaggugc	gccuuccucagugg	acuggccacagaaggugcaagucugccuuccucagugg	chr1:203477768-203477806	Plasma	SRR822438	21	21	0	0						PRELP
JHU_ID_01057	JHU_ID_01057.5p		auuggaguguggcagagagcagga	cuagcucugccacucucuugc	auuggaguguggcagagagcaggacuucagacucuggcuggauggaccccggauugaauccuagcucugccacucucuugc	chr1:203506776-203506857	BrainCerebellum	SRR553573	20	20	0	0						OPTC
JHU_ID_01058	JHU_ID_01058.3p		accuccccgucuggucugucugc	aggcagcuagacagggaggggg	aggcagcuagacagggaggggguggggagagccggggccaccuccccgucuggucugucugc	chr1:203508497-203508559	Neural Stem Cell	SRR1988281	1	1	0	0						OPTC
JHU_ID_01060	JHU_ID_01060.3p		caagccccugaccuuggacag	guccacgguugggagcuguaggc	guccacgguugggagcuguaggcguggccaggagcugcugccaagccccugaccuuggacag	chr1:20358892-20358954	Biliosphere	ERR842911	2	2	0	0
JHU_ID_01061	JHU_ID_01061.5p/.3p		cgaaccgagcggcgaacgga	uccgccgcugggcuccac	uccgccgcugggcuccacccucccgggcucugcuguagucugagaacuccguggagaaugcgaaccgagcggcgaacgga	chr1:203629648-203629728	Lung	SRR372638	4	4	0	0						ATP2B4
JHU_ID_01062	JHU_ID_01062.3p		acgggcuguuaguauugag	caauacuaacagcccaucu	caauacuaacagcccaucuaacaucccaggcuccgugcugggcgcugggagucccagggguaagacgggcuguuaguauugag	chr1:203631585-203631668	Lung	SRR1608282	2	2	0	0						ATP2B4
JHU_ID_01063	JHU_ID_01063.3p		cuauccucaacugcuagaaggg	uugucaggcagggaagaaaggg	uugucaggcagggaagaaagggaauuuucuuuuccuauccucaacugcuagaaggg	chr1:203703060-203703116	Skin	SRR2174517	3	3	0	0						ATP2B4
JHU_ID_01064	JHU_ID_01064.5p		uugcagacucacuaugcaccugacu	uccagggugcuguggcugccuca	uugcagacucacuaugcaccugacuguacuuccaggcaggugcuuuuucugucugccagagaaacauuccagggugcuguggcugccuca	chr1:203729579-203729669	Testes	SRR333680	2176	2176	0	0		Ago_1815				ATP2B4
JHU_ID_01065	JHU_ID_01065.5p		acccaggggcgaggggaggc	cacuccccucgcccucuccccc	acccaggggcgaggggaggccgcugccacuccccucgcccucuccccc	chr1:203795844-203795892	Dendritic	SRR1708908	2	2	0	0		Ago_1817				ZC3H11A
JHU_ID_01066	JHU_ID_01066.5p/.3p		cacgugaaacccugucug	ggcagaucacaaggu	ggcagaucacaaggucaggaguucaagacaagccuggccaacacgugaaacccugucug	chr1:203817933-203817992	Breast ductal carcinoma	ERR372264	10588	10588	0	0		Ago_1818
JHU_ID_01068	JHU_ID_01068.5p		agggcugggaucccucagggua	ucuuuggggugcccagcccucc	agggcugggaucccucaggguacacaucuuuggggugcccagcccucc	chr1:204114217-204114265	Hepatocellular carcinoma (HepG2)	ERR738403	1	1	0	0						SOX13
JHU_ID_01069	JHU_ID_01069.3p		cuggccuguggcccagcu	cuguggcagggccagac	cuguggcagggccagaccucagacucagcccacuguucccaccgccccuggccuguggcccagcu	chr1:204226177-204226242	Retina	ERR973614	3	3	0	0						PLEKHA6
JHU_ID_01071	JHU_ID_01071.3p		gcugccucuguagcuccugg	aaggagacuggaggggaauagacag	aaggagacuggaggggaauagacagacaccugcugccucuguagcuccugg	chr1:204314538-204314589	Placenta	SRR822458	2	2	0	0
JHU_ID_01073	JHU_ID_01073.3p		cgagcugggucucuguugcu	cagcaaguccuggag	cagcaaguccuggagccaaggcucgagcugggucucuguugcu	chr1:204349637-204349680	Brain, Prefrontal Cortex	ERR409893	2	2	0	0
JHU_ID_01075	JHU_ID_01075.5p		ugaguugggcuugaucggucc	gcccucauccacaacuuguc	ugaguugggcuugaucgguccugccuggcacugggcccucauccacaacuuguc	chr1:204361661-204361715	Breast adenocarcinoma	SRR873383	2	2	0	0
JHU_ID_01076	JHU_ID_01076.3p	JHU_ID_01076.5p	aucccgucgaccuccagccgcu	ucggccuggagcagcgacgcca	ucggccuggagcagcgacgccaccgcugggcaaggccgagacucuguaggcuuccuccgaaucccgucgaccuccagccgcu	chr1:204411453-204411535	Macrophage	SRR1532975	4	1	0	3						PPP1R15B
JHU_ID_01078	JHU_ID_01078.5p		ugagccaccguauccggccgggc	cgggccgggugcgguggcucacg	ugagccaccguauccggccgggcuucgguacuuuuuaaaacuucccccagucgggccgggugcgguggcucacg	chr1:204472441-204472515	Brain, Prefrontal Cortex	SRR1759213	1	1	0	0						PIK3C2B
JHU_ID_01079	JHU_ID_01079.5p		cggccuggccucucgccc	guggaggcaggggcucug	cggccuggccucucgcccccaggaugacaccaggagaaugcccuccugggccgggguggaggcaggggcucug	chr1:20448765-20448838	Brain, Prefrontal Cortex	SRR1759214	1	1	0	0
JHU_ID_01080	JHU_ID_01080.5p	JHU_ID_01080.3p	aggguucaagucccuguucgggcgu	agucccaagagcggacaucgu	aggguucaagucccuguucgggcguuuguaguuuucguuacuuuaaccugcuaaauuaucccaucaagucccaagagcggacaucgu	chr1:204506576-204506663	Smooth Muscle Cell, Coronary	SRR5127211	56	52	3	1
JHU_ID_01081	JHU_ID_01081.3p		ucacugccucuggaucccga	ggggucagaggugcagugugaaca	ggggucagaggugcagugugaacaugagucaucaagucacugccucuggaucccga	chr1:204623446-204623502	Red Blood Cell	SRR5127232	1	1	0	0						LRRN2
JHU_ID_01082	JHU_ID_01082.5p		agguggcggagauuguagugagcug	accacugcacucuagccuga	agguggcggagauuguagugagcugagauuacaccacugcacucuagccuga	chr1:204680997-204681049	Brain, Frontal Cortex	SRR553572	5	5	0	0
JHU_ID_01083	JHU_ID_01083.5p	JHU_ID_01083.3p	ugaguugggagccagggcaccugc	uccucugggaaccucagc	ugaguugggagccagggcaccugcagcccugcuuggguccucugggaaccucagc	chr1:20476096-20476151	Colon adenocarcinoma	SRR1917329	4	3	0	1
JHU_ID_01084	JHU_ID_01084.5p		gggccugguccugggacu	ucucaccagccuccug	gggccugguccugggacucuggggguacugcuguggcaccauggagcucucaccagccuccug	chr1:204852751-204852814	SkinDermis	SRR1259220	7	7	0	0						NFASC
JHU_ID_01085	JHU_ID_01085.5p	JHU_ID_01085.3p	cuccgggccgcucgcgcgagugc	acucgcgcgcggagccggagcg	acucgcgcgcggagccggagcgcagcgcagcgcagccgcgggcgcucuccgggccgcucgcgcgagugc	chr1:20485548-20485617	Colon adenocarcinoma	SRR1917329	155	137	1	17		Ago_379				CAMK2N1
JHU_ID_01087	JHU_ID_01087.5p		cggcgaggauaaugagcgc	ccucaugcaccuugcccccucgga	cggcgaggauaaugagcgcuccucaugcaccuugcccccucgga	chr1:20487078-20487122	Epithelium Colonic Epithelium (flow)	SRR5127219	2	2	0	0
JHU_ID_01088	JHU_ID_01088.3p		gauguggugucuugcaccugaag	gcaggugcaacucagcacaucca	gcaggugcaacucagcacauccagaugcaagccuggauguggugucuugcaccugaag	chr1:204910588-204910646	Colon adenocarcinoma	SRR1264358	1	1	0	0						NFASC
JHU_ID_01089	JHU_ID_01089.5p		ucccgcaggucgugccuggcgcc	ugccaggcccuggggaga	ucccgcaggucgugccuggcgccuccuugaugccaggcccuggggaga	chr1:2049428-2049476	Adrenal	SRR944034	3	3	0	0						RP11-547D24.3
JHU_ID_01090	JHU_ID_01090.5p		aucuuacccauuccccuagag	cugggggaagaggugaggcuc	aucuuacccauuccccuagagcuauacaaagagcucugggggaagaggugaggcuc	chr1:204967302-204967358	Kidney	SRR553575	1	1	0	0						NFASC
JHU_ID_01091	JHU_ID_01091.3p		gucaugggcgacucgggccaau	aggcccgagaggcuguggcuu	aggcccgagaggcuguggcuucagaaaugaaggucaugggcgacucgggccaau	chr1:2049773-2049827	Colon adenocarcinoma	SRR1917330	2	2	0	0						RP11-547D24.3
JHU_ID_01093	JHU_ID_01093.5p		gaagcugcgaggagcggagaac	ucucugggccccagcccccac	gaagcugcgaggagcggagaacccggccagggucacggacgggagcguccggacucggguucucugggccccagcccccac	chr1:2049918-2049999	Hepatocellular carcinoma (HepG2)	ERR738414	2	2	0	0						RP11-547D24.3
JHU_ID_01094	JHU_ID_01094.5p	JHU_ID_01094.3p	uuagcucccucuucccauguuc	gcugggaagguggugcugcuga	gcugggaagguggugcugcugagugcggguuauuccauuagcucccucuucccauguuc	chr1:204996328-204996387	Neuron iPSC	SRR1777169	6806	6530	0	276	TJU_CMC_MD2.ID00260.3p-miR	Ago_1839				NFASC
JHU_ID_01095	JHU_ID_01095.5p		acagacaggguuggaguc	cuccagcccuggguguua	acagacaggguuggagucuguacacugugcugccugccuccagcccuggguguua	chr1:205059939-205059994	Lung squamous carcinoma	SRR1013976	3	3	0	0						CNTN2
JHU_ID_01096	JHU_ID_01096.3p		aaggcgcguacuuacccugua	cucggguguguagcgccgcuga	cucggguguguagcgccgcugaccucaccaaggcgcguacuuacccugua	chr1:205122364-205122414	Monocyte	SRR926589	2	2	0	0
JHU_ID_01098	JHU_ID_01098.5p		cggcccagaacuccagug	caggagggucugggccccu	cggcccagaacuccaguggcauugccuccgagccuuggucccaggaauuggacgccggaaugcaggagggucugggccccu	chr1:2052184-2052265	Lung	SRR1608282	1	1	0	0
JHU_ID_01099	JHU_ID_01099.5p		ucuccccagcaccuccacca	gggauaggggagagg	ucuccccagcaccuccaccagccucccggggauaggggagagg	chr1:205239022-205239065	B Cell Centrocyte	SRR060982	117	117	0	0
JHU_ID_01100	JHU_ID_01100.3p	JHU_ID_01100.5p	cuagcauaagacugauccucc	agggaucagaucuuauguuc	agggaucagaucuuauguucaucuggaccauucacugugccuagcauaagacugauccucc	chr1:205255701-205255762	Blood	SRR2201551	13	6	0	7
JHU_ID_01101	JHU_ID_01101.3p		auggcggcugcagagucugggaacu	cuccuagagcaauccgccccuaaucc	cuccuagagcaauccgccccuaauccccaggcugugccucagucuggagauggcggcugcagagucugggaacu	chr1:205257156-205257230	Retina	ERR973612	2	2	0	0
JHU_ID_01102	JHU_ID_01102.3p		gccagguugaagugggggc	cccugcauucugaagaacggucc	cccugcauucugaagaacgguccccagcaaaggaggccagguugaagugggggc	chr1:205275064-205275118	SkinDermis	SRR1259216	12	12	0	0
JHU_ID_01104	JHU_ID_01104.3p		uaggcagugucucuccccagcu	aagggguggggacuggcccagg	aagggguggggacuggcccagggggacagugacagacucccuaggcagugucucuccccagcu	chr1:205313589-205313652	Colon adenocarcinoma	SRR1917329	30	30	0	0						NUAK2
JHU_ID_01106	JHU_ID_01106.3p		uuccucugaaucuagcucccacc	cgggaagugugcuagaaagguggagag	cgggaagugugcuagaaagguggagagaaaauugggauggaagucacccagcuggcuuuccucugaaucuagcucccacc	chr1:205318907-205318987	Colon adenocarcinoma	SRR1917325	4	4	0	0						NUAK2
JHU_ID_01108	JHU_ID_01108.5p/.3p		aggaaggcaggagggggagaug	ucucuccuccuucagcucauucccgu	ucucuccuccuucagcucauucccguguuccaucugaggggcgggaggaaggcaggagggggagaug	chr1:205436098-205436165	Cervical cancer	SRR1240813	33	33	0	0	TJU_CMC_MD2.ID00261.3p-miR	Ago_1846				BLACAT1
JHU_ID_01109	JHU_ID_01109.3p	JHU_ID_01109.5p	aggcaggaaguggcucug	gagugaguggcugccugg	gagugaguggcugccuggaaggcaggaaguggcucug	chr1:205449921-205449958	Thyroid	SRR1291267	55	54	0	1
JHU_ID_01110	JHU_ID_01110.5p	JHU_ID_01110.3p	ucuguggggucuaggucugg	agcuacuccccacacaca	agcuacuccccacacacaucagaguccuuccuagccauugugucuguggggucuaggucugg	chr1:205455256-205455318	H9 Differentiated Forebrain	SRR1988291	278	274	0	4
JHU_ID_01111	JHU_ID_01111.3p		uccccugacaucacccuucccuccu	gaggagaagggggaggggaug	gaggagaagggggaggggaugcuuccagccccauccccugacaucacccuucccuccu	chr1:205579689-205579747	Brain, Prefrontal Cortex	ERR409900	13	13	0	0		Ago_1849				MFSD4
JHU_ID_01112	JHU_ID_01112.5p/.3p		cccuccccgccccgcgccg	gcgcgcgggggugguggc	gcgcgcgggggugguggcugcgcgcccgugcgcgcgccccuccccgccccgcgccg	chr1:205749739-205749795	Epithelium Colonic Epithelium (flow)	SRR5127219	33	33	0	0						SNORA72
JHU_ID_01113	JHU_ID_01113.5p		uuacugcggauaacugaaacug	guuucaguuacccgcagucaac	uuacugcggauaacugaaacuguggguuucacuuuccacaguuucaguuacccgcagucaac	chr1:205907593-205907655	Prostate adenocarcinoma	SRR1810079	9	9	0	0
JHU_ID_01115	JHU_ID_01115.5p/.3p		cccgcggcuggaggaaggggccac	uuccuuuuccuccgagcgccgggag	uuccuuuuccuccgagcgccgggaggaggaagcucccgcuagcgucucccacuucccgcggcuggaggaaggggccac	chr1:206204420-206204498	Fibroblast Dermal (adult)	SRR5127205	2	2	0	0
JHU_ID_01116	JHU_ID_01116.5p		ugccuguuuguagacuggacagg	uguacccguuuauaaauauuugcauu	ugccuguuuguagacuggacagggaauaaaaccacuacucuguacccguuuauaaauauuugcauu	chr1:206243280-206243346	Retina	ERR973611	2	2	0	0						SRGAP2
JHU_ID_01117	JHU_ID_01117.3p		uccugacccuguugcugacucug	gaggcaggagggcagggcggugggaag	gaggcaggagggcagggcggugggaagugauacucauggucacuuccugacccuguugcugacucug	chr1:206381361-206381428	Stromal cell Prostate	SRR5127226	1	1	0	0						SRGAP2
JHU_ID_01118	JHU_ID_01118.3p		ugcagauuguggaggcaacaggagg	ucuuggccucugcagccagu	ucuuggccucugcagccagucuauccccaucaguguggguugucugcagauuguggaggcaacaggagg	chr1:206403801-206403870	Testes	SRR553576	16	16	0	0						SRGAP2
JHU_ID_01119	JHU_ID_01119.3p		ggagggaagcgaaugggg	cccuuugcugcauaacaa	cccuuugcugcauaacaaugguggagggaagcgaaugggg	chr1:20642187-20642227	Plasma	SRR822438	7	7	0	0
JHU_ID_01120	JHU_ID_01120.5p		acggaguggcagaacagugc	ccagcugccacuccaauu	acggaguggcagaacagugcuggggugcagguauggcucagcucuuugcacuaagccugccccugagccagcugccacuccaauu	chr1:20649958-20650043	Retina	ERR973614	2	2	0	0						PINK1-AS
JHU_ID_01121	JHU_ID_01121.5p		uucacccccgacccgcacccuca	agggagcaggucggagggaaaagcu	uucacccccgacccgcacccucacgcgccccgggagggagcaggucggagggaaaagcu	chr1:206507164-206507223	Brain, Prefrontal Cortex	SRR1759215	1	1	0	0		Ago_1863
JHU_ID_01122	JHU_ID_01122.3p		cggucggggggcggcggcg	cugcgccccucgcgcgcc	cugcgccccucgcgcgccccgggcgcaguggagaggggcgccgggacacagaggcgcgaggaccggucggggggcggcggcg	chr1:206507702-206507784	Lung	SRR1608281	12	12	0	0						RASSF5
JHU_ID_01123	JHU_ID_01123.5p		ugcuugcuagugaauggg	caaacucggagcagggccc	ugcuugcuagugaaugggcuucccaaacucggagcagggccc	chr1:206531259-206531301	Plasma	SRR822438	25	25	0	0						RASSF5
JHU_ID_01124	JHU_ID_01124.3p		gucucuucggucugugcag	ggaagccaaggacac	ggaagccaaggacacuuggcccaaggccccccuguaagggcucagcuaggugucucuucggucugugcag	chr1:20655779-20655849	Colon adenocarcinoma	SRR1917336	10	10	0	0						DDOST
JHU_ID_01125	JHU_ID_01125.5p		acucuccuaguuggcugcaggccu	gucugucaguaucuuggugggagugg	acucuccuaguuggcugcaggccucgugucugucaguaucuuggugggagugg	chr1:206558368-206558421	Dendritic	SRR1708911	2	2	0	0
JHU_ID_01126	JHU_ID_01126.5p/.3p		cccacggcugagggccuggca	ccgggccccagcauggcug	ccgggccccagcauggcugcccccacggcugagggccuggca	chr1:206612412-206612454	Cervical cancer	SRR1304304	44	44	0	0						EIF2D
JHU_ID_01130	JHU_ID_01130.5p		uccacugagauucagaccu	cucuggcucucagcaaggc	uccacugagauucagaccuuuccucuggcucucagcaaggc	chr1:206702432-206702473	Plasma	SRR822438	639	639	0	0						MAPKAPK2
JHU_ID_01131	JHU_ID_01131.5p	JHU_ID_01131.3p	uugcucuguucacaggccugcc	caggccuggggccagagcccaguagag	uugcucuguucacaggccugcccuauucgcaucaggccuggggccagagcccaguagag	chr1:206716996-206717055	Platelet	SRR1592244	5	4	0	1						MAPKAPK2
JHU_ID_01132	JHU_ID_01132.5p/.3p		ucucccucaggggcagguggugg	acucccccuucccuuggaggga	acucccccuucccuuggagggagagguggcaggaauacuucaccuuuccucucccucaggggcagguggugg	chr1:206734060-206734132	Adrenal	SRR944031	100	100	0	0	TJU_CMC_MD2.ID00265.3p-miR	Ago_1868				MAPKAPK2
JHU_ID_01135	JHU_ID_01135.5p		cucccucgggcuuggcagugucu	augcuccaagcguggggaaug	cucccucgggcuuggcagugucugaccuggagaugcuccaagcguggggaaug	chr1:206909949-206910002	Lung Adenocarcinoma	SRR1013967	2	2	0	0						FCMR
JHU_ID_01136	JHU_ID_01136.3p		cugguucugugcucucuc	gaggaacagaacauugg	gaggaacagaacauuggccaaguuauugcagcagccugaggcugcugcagccccuccugaguccugguucugugcucucuc	chr1:206969701-206969782	Colon adenocarcinoma	SRR1917324	2	2	0	0						FCAMR
JHU_ID_01137	JHU_ID_01137.5p		aggacugggguggagagggccuu	ggcauuccaccucagccaucugc	aggacugggguggagagggccuugaacaccauugcaaggcauuccaccucagccaucugc	chr1:20702519-20702579	Lung Adenocarcinoma	SRR1240814	2	2	0	0						KIF17
JHU_ID_01138	JHU_ID_01138.5p		aagugacugccuagaccc	gucuaggcaucauuuau	aagugacugccuagacccuugcugaguguuuaacuuuaauuugggggaaggauugaaugugauuuggagggucuaggcaucauuuau	chr1:207069550-207069637	Islet Beta Cell	SRR873410	3	3	0	0						PFKFB2
JHU_ID_01141	JHU_ID_01141.3p	JHU_ID_01141.5p	uuguaugacacugugagugagu	uugcucucaggguugugcaagu	uugcucucaggguugugcaaguacugauucugcacuuguaugacacugugagugagu	chr1:207215451-207215508	Islet Alpha Cell	SRR1028924	46	43	0	3
JHU_ID_01142	JHU_ID_01142.3p		ucccuggccucaucagcucuggcc	uuugggcugagugaggcagggucc	uuugggcugagugaggcagggucccaugcagcaggucccuggccucaucagcucuggcc	chr1:20728835-20728894	Epithelium Keratinocyte (Adult)	SRR5127203	2	2	0	0						SH2D5
JHU_ID_01143	JHU_ID_01143.3p		cgcuugucgaccaggcuggag	ccagccugggcgacacagcaag	ccagccugggcgacacagcaagacucugucucaaaagucucgcuugucgaccaggcuggag	chr1:20735067-20735128	Blood	SRR2201546	1	1	0	0
JHU_ID_01144	JHU_ID_01144.5p		ucagcuguuaagauauguaguau	augaaauaucuuaacaguugaca	ucagcuguuaagauauguaguauugaacuguguaucuucucagauaugaaauaucuuaacaguugaca	chr1:20764563-20764631	Heart	ERR038425	1	1	0	0						HP1BP3
JHU_ID_01145	JHU_ID_01145.3p		aagauaaaggugcugaagucu	acuucagcaccuuuaucuuuu	acuucagcaccuuuaucuuuucugauaucagaaaagauaaaggugcugaagucu	chr1:207672436-207672490	Red Blood Cell	SRR5127232	32	32	0	0	TJU_CMC_MD2.ID00266.3p-miR					CR1L
JHU_ID_01146	JHU_ID_01146.3p	JHU_ID_01146.5p	cauccucugcgauggcucau	aacauucacacggggagu	aacauucacacggggaguuucagcauccucugcgauggcucau	chr1:207685696-207685739	Epithelium Retinal Pigment	SRR493013	9	8	0	1						CR1L
JHU_ID_01147	JHU_ID_01147.5p	JHU_ID_01147.3p	auuggcugugcagaucuugccuacu	uagguuacagccagccagaca	auuggcugugcagaucuugccuacuucauaaagaauuugaaguagguuacagccagccagaca	chr1:207801383-207801446	Colon adenocarcinoma	SRR1917329	813	811	0	2		Ago_1876
JHU_ID_01148	JHU_ID_01148.3p		ucccuggguucugaguccu	ggcucagggccugggaaa	ggcucagggccugggaaaugcaguggucccuggguucugaguccu	chr1:207806433-207806478	Thyroid	SRR1658401	2	2	0	0
JHU_ID_01149	JHU_ID_01149.5p		uccaggcacgggggcccugggu	caagguuacccugccccugggau	uccaggcacgggggcccugggucgggacugcuggcuggaugggaggaugcaccaagguuacccugccccugggau	chr1:207806704-207806779	Myoblast Skeletal Muscle	SRR1200890	1	1	0	0
JHU_ID_01152	JHU_ID_01152.5p		uggccugucuuaacucuagaua	ucuggaguuuggacugggcugag	uggccugucuuaacucuagauacauuuugccuugagggggcuuagucuagguugguggucuggaguuuggacugggcugag	chr1:207815435-207815516	Brain, Prefrontal Cortex	ERR409879	2	2	0	0
JHU_ID_01153	JHU_ID_01153.5p		agggcaggguggguugga	cucucauaggugcuguuga	agggcaggguggguuggauauuccccucuuuccucucauaggugcuguuga	chr1:207816070-207816121	Bladder	DRR013043	2	2	0	0
JHU_ID_01155	JHU_ID_01155.5p		cucaaagcugccauggac	acagagccuauuugggga	cucaaagcugccauggaccucacuucccuguccccacagggaggcugcuggagacagagccuauuugggga	chr1:207820909-207820980	BrainFrontal	SRR448330	3	3	0	0
JHU_ID_01156	JHU_ID_01156.3p		aucuugcuguggacugggcc	ccuguuguccaccagcucccagg	ccuguuguccaccagcucccagggagugaacagaaaugccaucuugcuguggacugggcc	chr1:207827219-207827279	Brain, Prefrontal Cortex	ERR409898	2	2	0	0
JHU_ID_01158	JHU_ID_01158.5p		ccuuccucaacucugggcgcccccu	gggcaccacgcccacugcggagaggagaaa	ccuuccucaacucugggcgcccccucugcagcaaaggggcaccacgcccacugcggagaggagaaa	chr1:207868649-207868715	Breast ductal carcinoma	ERR372264	2	2	0	0
JHU_ID_01159	JHU_ID_01159.5p/.3p		cagcggcugcgcaucucgggc	ccgggaagcggccgccgcg	ccgggaagcggccgccgcggagccggcguccgcagcggcugcgcaucucgggc	chr1:207869107-207869160	Neuroblastoma	SRR1304311	1967	1967	0	0	TJU_CMC_MD2.ID00267.3p-miR
JHU_ID_01160	JHU_ID_01160.5p/.3p		cgccccgcucccuuccucucucc	agagaggagggggcggggcgcc	agagaggagggggcggggcgcccggguccccggagguggcgccuuuugucugccuuacccggccgcuccgccccgcucccuuccucucucc	chr1:20787001-20787092	Platelet	SRR1592249	3	3	0	0
JHU_ID_01161	JHU_ID_01161.5p		ccccccaggucagaguagacaca	uucuagagaccuggcagcc	ccccccaggucagaguagacacagugaaggacuauguggggacuguuguucuagagaccuggcagcc	chr1:207886060-207886127	Skin	SRR2174521	2	2	0	0						CD34
JHU_ID_01163	JHU_ID_01163.5p		agacauucuaaggucucggug	cuugggaccuuagaaggucuua	agacauucuaaggucucggugcuaaggucucaauuuggaaauuaggucuugggaccuuagaaggucuua	chr1:207919149-207919218	BladderEpithelium	DRR013036	1	1	0	0
JHU_ID_01167	JHU_ID_01167.3p		aguccaguagacucugcaaugc	accaggucucuugaccau	accaggucucuugaccaugaguccaguagacucugcaaugc	chr1:208767414-208767455	Epithelium Retinal Pigment	SRR493013	10	10	0	0
JHU_ID_01168	JHU_ID_01168.5p		caucugauggaggagacucaaaugc	aaguggguucuccuccuucaguucuu	caucugauggaggagacucaaaugccagugcugaacuucugagcaaguggguucuccuccuucaguucuu	chr1:209246218-209246288	Breast adenocarcinoma	SRR960732	6	6	0	0
JHU_ID_01169	JHU_ID_01169.5p/.3p		ggugguggcggcggcgguggugg	gcugcugcugcugcugcugcugc	gcugcugcugcugcugcugcugcugcuacggugguggcggcggcgguggugg	chr1:209432266-209432318	BrainPrefrontalCortex	SRR1759217	17	17	0	0						MIR205
JHU_ID_01170	JHU_ID_01170.5p	JHU_ID_01170.3p	agcuggcagcuguggcugagucu	uuuaggcuugcagucugcuggcuu	agcuggcagcuguggcugagucucugugugcaggaguuuaggcuugcagucugcuggcuu	chr1:209504609-209504669	Mesangial	SRR5127221	2	1	0	1
JHU_ID_01171	JHU_ID_01171.5p		gcuggcucagggaggaca	uccugcugcaggcu	gcuggcucagggaggacagguuuguucaguaguaugccuccuuccuguccugcugcaggcu	chr1:209608922-209608983	H9 Differentiated Midbrain	SRR1988302	17	17	0	0						CAMK1G
JHU_ID_01172	JHU_ID_01172.3p		ucugagccccuuucucuugcagg	agaggagagccccaugccagagu	agaggagagccccaugccagagugugagugauggggucugagguggcaacccccuccucacucugagccccuuucucuugcagg	chr1:209612957-209613041	Brain, Prefrontal Cortex	ERR409879	3	3	0	0						CAMK1G
JHU_ID_01173	JHU_ID_01173.3p	JHU_ID_01173.5p	ccuccaggccgucagccacucuga	aaguggcccugaaugguauuggagg	aaguggcccugaaugguauuggaggccaugcccgugacaggagaagguuugccuccaggccgucagccacucuga	chr1:209651438-209651513	Epithelium Prostate	SRR5127212	3	2	0	1
JHU_ID_01174	JHU_ID_01174.3p		caggcugcagagagagaa	cucacuuagagcuugga	cucacuuagagcuuggaggaagaagguuuacuggcugggaaggcucagccuggucucucaggcugcagagagagaa	chr1:209756833-209756909	Dendritic	SRR1708910	3	3	0	0						TRAF3IP3
JHU_ID_01175	JHU_ID_01175.3p		ucuuccucagggccucuuuggucug	guccagagagaugaaggcauauc	guccagagagaugaaggcauauccuauauuuagacaucagaauggggucuuccucagggccucuuuggucug	chr1:209788724-209788796	Epithelium Mammary	SRR5127224	2	2	0	0						IRF6
JHU_ID_01176	JHU_ID_01176.3p		cccggccuucccucccucccu	gcucuggcggggcuggcccgggcc	gcucuggcggggcuggcccgggcccccgcgcuccagcccgcagcagaugucggcccggccuucccucccucccu	chr1:210233838-210233912	Skin	SRR2174529	3	3	0	0						SERTAD4
JHU_ID_01177	JHU_ID_01177.5p		accagggcucgggcaucggagc	ucuuuaggcccagcaccugcagc	accagggcucgggcaucggagcaccccuucgugcucuuuaggcccagcaccugcagc	chr1:210234316-210234373	Neuroblastoma	SRR1304311	2	2	0	0						SERTAD4
JHU_ID_01178	JHU_ID_01178.3p		cagcggcuguggcgcgcu	cgcggcgcggcccggc	cgcggcgcggcccggcgggggcucugccgagcgccccgggcucggaggagccgcgcugucagcggcuguggcgcgcu	chr1:210251629-210251706	Endothelial Aortic	SRR5139121	1	1	0	0
JHU_ID_01180	JHU_ID_01180.3p		ugggggaauaggacagacacaagcc	uagcaucugccuuuggggaacucccagu	uagcaucugccuuuggggaacucccagucugacugggggaauaggacagacacaagcc	chr1:211036819-211036877	Fibroblast strain	SRR020286	2	2	0	0						KCNH1
JHU_ID_01182	JHU_ID_01182.5p		ggcagaggacgcuggaaccug	gcagccacuguccuguggucuaa	ggcagaggacgcuggaaccuggcuggucggggagaaaaugucuccuuggcagcugcagccacuguccuguggucuaa	chr1:211260810-211260887	Thyroid	SRR1291269	12	11	1	0						RCOR3
JHU_ID_01183	JHU_ID_01183.5p		agaaucauugcuugaacccgggagg	gccugggcaacagagugagacucc	agaaucauugcuugaacccgggaggcggagguugcagugagccgagaucacgccauugcacuccagccugggcaacagagugagacucc	chr1:211261830-211261919	Skin	SRR2174509	10	8	2	0						RCOR3
JHU_ID_01184	JHU_ID_01184.3p		ugacccagggcagguggaa	ucauauuuucugcccgaguucgcu	ucauauuuucugcccgaguucgcuccugacccagggcagguggaa	chr1:2113418-2113463	Skin	SRR1259228	17	17	0	0						PRKCZ
JHU_ID_01185	JHU_ID_01185.3p	JHU_ID_01185.5p	uccgcggcugcaccccucucga	aggggcgcggggacucaa	aggggcgcggggacucaagccacgguuuuuguguccgcggcugcaccccucucga	chr1:211382609-211382664	Lung Adenocarcinoma	SRR1013979	20	19	0	1		Ago_1905
JHU_ID_01186	JHU_ID_01186.3p	JHU_ID_01186.5p	ugggccgcuaaggacaggc	cugucggucgcaucggggu	cugucggucgcaucggggugcaugcugcuuccugggccgcuaaggacaggc	chr1:211416507-211416558	B Cell_naive	SRR060985	2	1	0	1						LINC00467
JHU_ID_01188	JHU_ID_01188.5p		ccccucggguguggcggaguc	cucccagcacaccugcgggggc	ccccucggguguggcggaguccuggccugcggaccaucgcaacucccagcacaccugcgggggc	chr1:211579516-211579580	Thyroid	SRR1291269	3	3	0	0
JHU_ID_01189	JHU_ID_01189.5p/.3p		cucccagcacaccggccug	gggcuggggguggcgggagug	gggcuggggguggcgggaguguagaagaggcugagggcucccagcacaccggccug	chr1:211643847-211643903	Hepatocellular carcinoma (HepG2)	ERR738415	4	4	0	0						RP11-354K1.1
JHU_ID_01190	JHU_ID_01190.5p		uuggacccccucccuggacaca	uguccuagggcugggggugcagc	uuggacccccucccuggacacaggcagguguccuagggcugggggugcagc	chr1:21217550-21217601	Smooth Muscle Cell Aorta	SRR5127217	1	1	0	0						ECE1
JHU_ID_01191	JHU_ID_01191.3p		uaggucagcuggcuccaucugc	agagaccuggguggccuggg	agagaccuggguggccugggccugucuugugauccuaggucagcuggcuccaucugc	chr1:21226050-21226107	Fibroblast strain	SRR020286	1	1	0	0						ECE1
JHU_ID_01193	JHU_ID_01193.3p		ccccugacuuguguuuuccaga	ugggaaacaaagggcuggggc	ugggaaacaaagggcuggggcccagcgagcccccugacuuguguuuuccaga	chr1:21238243-21238295	Embryonic kidney	SRR1240817	2	2	0	0						ECE1
JHU_ID_01194	JHU_ID_01194.3p		agggacggagaagaggagug	cugcgucucucacuuccucu	cugcgucucucacuuccucucuuuguuggagggggagggacggagaagaggagug	chr1:212415062-212415117	Breast adenocarcinoma	SRR960732	2	2	0	0
JHU_ID_01195	JHU_ID_01195.5p		cccuuggggccaccgcgucag	agggcgguggcccuucuaggguc	cccuuggggccaccgcgucagcagucggcggggccgugggagggacggugcccgcccgcugugaagggcgguggcccuucuaggguc	chr1:212558414-212558501	Thyroid	SRR1291268	2	2	0	0						RP11-61J19.5
JHU_ID_01196	JHU_ID_01196.5p		agcgcccgcguuccagcaccucg	aggaaaacccacggcggggcagg	agcgcccgcguuccagcaccucgagucgcccgcgggcccccaccccucgggccgggcccgguccucgaggaaaacccacggcggggcagg	chr1:212558773-212558863	T cell leukemia	SRR1292463	3	3	0	0						RP11-61J19.5
JHU_ID_01197	JHU_ID_01197.5p/.3p		cccgcuggagugcgcgcagguaaa	cccccgcgcgccgcucagcacacc	cccccgcgcgccgcucagcacaccuccacaacccgcccucccgcuggagugcgcgcagguaaa	chr1:212606847-212606910	Hepatocellular carcinoma	SRR609258	3	3	0	0						ATF3
JHU_ID_01199	JHU_ID_01199.5p		ucgaugcucugaucagug	aggaucggggggcagggagc	ucgaugcucugaucagugaaagccauggugcuauuuauggugaggaucggggggcagggagc	chr1:21262030-21262092	Dendritic	SRR1708919	2	2	0	0						ECE1
JHU_ID_01200	JHU_ID_01200.5p		aggccccggggaagcuucgu	ggaguagaagcaggggcugug	aggccccggggaagcuucguuugagcuucgggcugaaggaugaacucaauguggaguagaagcaggggcugug	chr1:21263084-21263157	Skin	SRR1259230	32	32	0	0						ECE1
JHU_ID_01201	JHU_ID_01201.3p	JHU_ID_01201.5p	ccaggacuggagccuaagccu	guuggguaacucguccuaggucg	guuggguaacucguccuaggucgcaaaaguggcuguggccaggacuggagccuaagccu	chr1:21266762-21266821	Platelet	SRR1592246	2	1	0	1						RP3-329E20.2
JHU_ID_01202	JHU_ID_01202.3p		uucaucccuucugccucuggug	cuaggggcaguuuaggagagaagg	cuaggggcaguuuaggagagaaggggaucggggaaccuucaucccuucugccucuggug	chr1:212727097-212727156	Islet Alpha Cell	SRR1028924	2	2	0	0						NSL1
JHU_ID_01203	JHU_ID_01203.5p		auggcccggggucuccug	ggaggcggccccgcggguugugu	auggcccggggucuccugcaccugagggugggcgggaggcggccccgcggguugugu	chr1:212858009-212858066	Valve Interstitial Cell	SRR948072	1	1	0	0						FLVCR1-AS1
JHU_ID_01205	JHU_ID_01205.5p		aggugacucagggcugggg	ucugacccuuggucaucuca	aggugacucagggcuggggggagguccuuucuccucucugacccuuggucaucuca	chr1:21293976-21294032	CD3+ T Cell Splenic	SRR5127200	3	3	0	0						RP5-1071N3.1
JHU_ID_01207	JHU_ID_01207.3p		caggugcugggauugcaggcaugag	ccuggccucaaacaauccuccggccuggg	ccuggccucaaacaauccuccggccugggucuccccaggugcugggauugcaggcaugag	chr1:21295243-21295303	Skin	SRR2174542	8	8	0	0						RP5-1071N3.1
JHU_ID_01208	JHU_ID_01208.3p		uugggugugauuuaggggcucagcc	uugacccugaaaaauaacagucacug	uugacccugaaaaauaacagucacuggcuaaaaguacugggucugcugagaggggcagauaaagccguugggugugauuuaggggcucagcc	chr1:212977945-212978037	SkinEpidermis	SRR1259212	18	18	0	0						VASH2
JHU_ID_01209	JHU_ID_01209.5p		cugggguagagcuuggauugggacc	uaccugacucuggcucagag	cugggguagagcuuggauugggaccugaggaucugggguggggacccugaugugaggguaccugacucuggcucagag	chr1:213051528-213051606	Myoblast Skeletal Muscle	SRR1200890	1	1	0	0						RPS6KC1
JHU_ID_01211	JHU_ID_01211.3p	JHU_ID_01211.5p	caagugguuucaugacaggaga	ugcuggcaugcagcugcuucugu	ugcuggcaugcagcugcuucuguugguauucaugggcucgccaugcccucugacagacacaagugguuucaugacaggaga	chr1:21349481-21349562	Colon adenocarcinoma	SRR1917330	7	5	0	2		Ago_391
JHU_ID_01212	JHU_ID_01212.5p		ugaaaagaaccccggcugcu	ugagcuggggauuagaaggcacu	ugaaaagaaccccggcugcuggcuggcuguguguagcccaaacagcccaugugagcuggggauuagaaggcacu	chr1:214164066-214164140	Lung	SRR372648	11	11	0	0
JHU_ID_01213	JHU_ID_01213.3p		ucuguccacucaccuacc	uagguguggacugcca	uagguguggacugccauugcugagacucgaacuuuacuuccauagcuugcagcuauguaauacucuguccacucaccuacc	chr1:214189056-214189137	Monocytic leukemia	DRR000555	54	54	0	0
JHU_ID_01214	JHU_ID_01214.3p		gcgggcuggugcugggggcgcgg	gcgcggaguggaguggagcgg	gcgcggaguggaguggagcggagcgggcuggugcugggggcgcgg	chr1:21428004-21428049	Retina	ERR973604	2	2	0	0
JHU_ID_01215	JHU_ID_01215.5p	JHU_ID_01215.3p	augugugacauuuucucauucu	aaugagaaaaugucccaca	aaugagaaaaugucccacauuuguggacauuugcggacaaugugugacauuuucucauucu	chr1:214500012-214500073	Nasopharyngeal epithelial cell	SRR1564522	355	298	1	56		Ago_1928				PTPN14
JHU_ID_01217	JHU_ID_01217.5p	JHU_ID_01217.3p	acaccugauaugauuuagauag	uaucuaaaucauuucagguguag	acaccugauaugauuuagauagugagugauuuagauacuaucuaaaucauuucagguguag	chr1:215062548-215062609	Fibroblast Dermal (adult)	SRR5127205	2	1	0	1	TJU_CMC_MD2.ID00271.5p-miR					KCNK2
JHU_ID_01218	JHU_ID_01218.3p		auuuggccuuuuauguucuuga	gggaacauaaaaggccaaaucu	gggaacauaaaaggccaaaucuuuaauuuaaucuuuaaaucuuugauuuggccuuuuauguucuuga	chr1:215588397-215588464	Colon adenocarcinoma	SRR1917329	864	864	0	0	TJU_CMC_MD2.ID00272.3p-miR	Ago_1932				KCTD3
JHU_ID_01219	JHU_ID_01219.3p		uccugguggaggugaugu	agacacaggaccagggag	agacacaggaccagggagggcuuccugguggaggugaugu	chr1:21570034-21570074	Dendritic	SRR1708919	2	2	0	0						ALPL
JHU_ID_01220	JHU_ID_01220.3p		aaaaaccacaacuacuuugcgc	acaaaaguaauugugguuuucgc	acaaaaguaauugugguuuucgccauugaaguaauggcaaaaaccacaacuacuuugcgc	chr1:215860467-215860527	Heart	ERR038425	2	2	0	0		Ago_1933
JHU_ID_01221	JHU_ID_01221.5p/.3p		acaggucacacagcuggagcu	ggccggcuggucacaccucacc	ggccggcuggucacaccucacccucaacccaggacaggucacacagcuggagcu	chr1:21607069-21607123	Dendritic	SRR1708918	28	28	0	0						RAP1GAP
JHU_ID_01222	JHU_ID_01222.5p		acugugggccgaagggcugauc	acggcccgggccuggcccacaggag	acugugggccgaagggcugauccuuggggucccuccugacggcccgggccuggcccacaggag	chr1:21608347-21608410	Dendritic	SRR1708915	55	55	0	0		Ago_394				RAP1GAP
JHU_ID_01223	JHU_ID_01223.5p/.3p		cccucggcuuugggacuucccca	gcaggaggagcccggggccaggcu	gcaggaggagcccggggccaggcuggguggugucucccugaacuuccagcccucggcuuugggacuucccca	chr1:21614750-21614822	BrainFrontal	SRR448331	6	6	0	0						RAP1GAP
JHU_ID_01224	JHU_ID_01224.3p		accggauguggcuguaug	ugcagccaugugugcgugu	ugcagccaugugugcgugugugugagacuccacgaccggauguggcuguaug	chr1:21623905-21623957	Biliosphere	ERR842905	3	3	0	0						RAP1GAP
JHU_ID_01225	JHU_ID_01225.5p		agcccagcccaacucugccagc	gggcagggcugggggcucc	agcccagcccaacucugccagcaagaggacguccuccgcagggcagggcugggggcucc	chr1:21650569-21650628	Thyroid	SRR1658402	1	1	0	0						RAP1GAP
JHU_ID_01226	JHU_ID_01226.3p		uugccucugcagcuguugggccc	gcaggcaggucagggggaggu	gcaggcaggucagggggagguucugcuggaccucccacuuugccucugcagcuguugggccc	chr1:21651313-21651375	Brain, Prefrontal Cortex	SRR1759215	1	1	0	0						RAP1GAP
JHU_ID_01227	JHU_ID_01227.5p		agccugugcaugcccucggaguc	uguuggggucauagcacaggcccg	agccugugcaugcccucggaguccuuguuggggucauagcacaggcccg	chr1:21668428-21668477	Dendritic	SRR1708912	2	2	0	0						RAP1GAP
JHU_ID_01228	JHU_ID_01228.5p	JHU_ID_01228.3p	ccgccgcucccgcgcccgcggcu	ggcggggcggggcggcagggcgg	ggcggggcggggcggcagggcgggggccuccccgccgcucccgcgcccgcggcu	chr1:21669428-21669482	Dendritic	SRR1708912	5	3	0	2
JHU_ID_01229	JHU_ID_01229.5p		ggggagggagcucagugga	gugagggcucccccuuggugg	ggggagggagcucaguggagaacagaaagaggugugggugagggcucccccuuggugg	chr1:21670156-21670214	Lung	SRR372614	9	9	0	0
JHU_ID_01231	JHU_ID_01231.3p		aaugauggagggagaaggccu	gccuucucccuccaucauuua	gccuucucccuccaucauuuaagcuauucauuuagcuuaaaugauggagggagaaggccu	chr1:217606181-217606241	Platelet	SRR1592246	2	2	0	0						GPATCH2
JHU_ID_01232	JHU_ID_01232.3p	JHU_ID_01232.5p	auccuuguugacugucuguc	guggagaguucuguagauguc	guggagaguucuguagaugucuauuagguccgcuuggugcagagcugaguucaauuccuggguauccuuguugacugucuguc	chr1:217693979-217694062	T cell leukemia	SRR1292458	414	410	2	2						SPATA17
JHU_ID_01233	JHU_ID_01233.5p	JHU_ID_01233.3p	ggcaugcugggauuuguagucuu	gacuacgugucccggcaugcccu	gacuacgugucccggcaugcccugcguccugccacugacugugaggcaugcugggauuuguagucuu	chr1:21783654-21783721	Myoblast Skeletal Muscle	SRR1200834	8	6	0	2						U7
JHU_ID_01234	JHU_ID_01234.3p		agccugauagauucccuuacau	uuaagggaaucuaucaggcugg	uuaagggaaucuaucaggcuggugcaaaaguuuggaccagccugauagauucccuuacau	chr1:218085987-218086047	Brain, Prefrontal Cortex	SRR1759216	1	1	0	0
JHU_ID_01235	JHU_ID_01235.5p		accccgcacugaccucug	guuguccaugccccagggguca	accccgcacugaccucugcagucagcuggugaccaggagcccuggucacugccaucgccacaguuguccaugccccagggguca	chr1:21816003-21816087	Skin	SRR2174509	4	4	0	0						LDLRAD2
JHU_ID_01237	JHU_ID_01237.5p		gcagcccuugcgacacccuggcug	ggggguugcgcaggggcuccc	gcagcccuugcgacacccuggcuggggaguuuuauuccugaggggguugcgcaggggcuccc	chr1:218345665-218345727	Breast adenocarcinoma	ERR227915	1	1	0	0						TGFB2-AS1
JHU_ID_01238	JHU_ID_01238.3p		cugaccucuccccugugccccagc	ugagggcaucaggguggcaucucagcu	ugagggcaucaggguggcaucucagcucacugaccucuccccugugccccagc	chr1:21844298-21844351	Myoblast Skeletal Muscle	SRR5127218	82	82	0	0		Ago_400				HSPG2
JHU_ID_01240	JHU_ID_01240.5p	JHU_ID_01240.3p	uuggggggugguaacuguaggagc	cccccgcccacguugccacccccaa	uuggggggugguaacuguaggagcagcccacaaagcccacugcccccgcccacguugccacccccaa	chr1:21865078-21865145	Coronary Endothelial Cell	SRR5127228	72	62	0	10		Ago_401				HSPG2
JHU_ID_01241	JHU_ID_01241.3p		gcuguugccagggcacacaaa	ggugucuccccugggaaacauucc	ggugucuccccugggaaacauuccagaaccaugaauggcuugggcuguugccagggcacacaaa	chr1:21869993-21870057	Adrenal	SRR944031	2	2	0	0						HSPG2
JHU_ID_01243	JHU_ID_01243.3p		acccagggcugucugauuggaa	guuguggggcuucccuggguuc	guuguggggcuucccuggguucacacagcaguuuagagggggagcugaacccagggcugucugauuggaa	chr1:21883069-21883139	Coronary Endothelial Cell	SRR5127228	2	2	0	0						HSPG2
JHU_ID_01244	JHU_ID_01244.3p		uccgggaccagaucaggcugcgcuu	gcgccgccugccugcccugcuu	gcgccgccugccugcccugcuucugcuuuggcaucaccagcgugugccagagcacccgccgcuuccgggaccagaucaggcugcgcuu	chr1:21884550-21884638	HUVEC	SRR5127213	2	2	0	0						HSPG2
JHU_ID_01245	JHU_ID_01245.3p		ucacucugaugggacacugacc	ggugugucccccagcaguggcg	ggugugucccccagcaguggcgugugagggauggucacucugaugggacacugacc	chr1:2190707-2190763	Cervical cancer	SRR1304304	350	350	0	0		Ago_87				FAAP20
JHU_ID_01247	JHU_ID_01247.3p	JHU_ID_01247.5p	aaggccaggguaggcccuggga	agcagggccgggacccucggcg	agcagggccgggacccucggcgcagccucccucuucuuggcaggagcaggagcgagaggagaaaaaggccaggguaggcccuggga	chr1:21931416-21931502	Lung Adenocarcinoma	SRR1013979	3	2	0	1						HSPG2
JHU_ID_01248	JHU_ID_01248.5p	JHU_ID_01248.3p	ugaccaaacagaaagacauucu	aaugucuuucuguuugguca	ugaccaaacagaaagacauucucagcagaggucgaaugucuuucuguuugguca	chr1:219336000-219336054	Lung	SRR372640	15	12	0	3
JHU_ID_01250	JHU_ID_01250.3p		cgggcggcgcggagcgagcga	gcggcugcgggcggcgcgga	gcggcugcgggcggcgcggagcgggcggcgcggagcgagcga	chr1:21937242-21937284	T cell leukemia	SRR1292463	1	1	0	0						HSPG2
JHU_ID_01252	JHU_ID_01252.3p		cggcccgggggcugcccggacg	gccgggcagccaucgggguaacgga	gccgggcagccaucgggguaacggagggggcuccggcccgggggcugcccggacg	chr1:2194999-2195054	Retina	ERR973613	3	3	0	0		Ago_88
JHU_ID_01253	JHU_ID_01253.5p		aaggcagcuguucuguaucua	gaugcagaacagcugccuuca	aaggcagcuguucuguaucuagcuuuccaaggaaagagggaaucaaugauagaugcagaacagcugccuuca	chr1:220164258-220164330	T cell leukemia	SRR1292458	17	17	0	0		Ago_1946				RAB3GAP2
JHU_ID_01255	JHU_ID_01255.3p		uggagccaaagucgacguggag	ucacgugacuacggcgccgcc	ucacgugacuacggcgccgccgcugcagguggagccaaagucgacguggag	chr1:220272546-220272597	Colon adenocarcinoma	SRR1917330	10	10	0	0
JHU_ID_01256	JHU_ID_01256.5p		aggcuguccugcccgagg	aagcacagagaugucagccugg	aggcuguccugcccgaggagcucagagcucaagcacagagaugucagccugg	chr1:22030678-22030730	Brain, Prefrontal Cortex	ERR409887	2	2	0	0
JHU_ID_01257	JHU_ID_01257.3p		aagacuggagacaaagugggagcc	caucaccacuaaaaucuccaggggcgc	caucaccacuaaaaucuccaggggcgccacugaaauccugagugaugugcagcugaucaagacuggagacaaagugggagcc	chr1:220317093-220317175	Colon adenocarcinoma	SRR1917337	10	5	5	0
JHU_ID_01258	JHU_ID_01258.3p		ccugcucugagggccccgcc	cuuggaccucagacgccccuc	cuuggaccucagacgccccucacagcucacagcccuguggccugcucugagggccccgcc	chr1:2204531-2204591	Brain, Prefrontal Cortex	SRR1759216	1	1	0	0
JHU_ID_01259	JHU_ID_01259.3p		aaggcggcggcuggcugagcc	gugagccggcggcgggaggaa	gugagccggcggcgggaggaaaccaaaggcggcggcuggcugagcc	chr1:2204765-2204811	CD4+ T Cell	SRR1532973	3	3	0	0
JHU_ID_01260	JHU_ID_01260.3p		aucccauucugcuucucugcc	cacagaaugcagagguagaaau	cacagaaugcagagguagaaauaaagcaauccugacugcccacucugccaucccauucugcuucucugcc	chr1:220529145-220529215	Islet Beta Cell	SRR1028925	4	4	0	0						MARK1
JHU_ID_01261	JHU_ID_01261.5p		cccggcgcgcgccgcucguu	cgagcgcgcuuccggggc	cccggcgcgcgccgcucguucugcgaccuccagggcgagcgcgcuuccggggc	chr1:2205468-2205521	Skin	SRR2174542	9	9	0	0
JHU_ID_01263	JHU_ID_01263.3p		ugagagcuaggggugggg	cugccccuagcugaaagucagc	cugccccuagcugaaagucagcugccucugacccgugggaggaaaggaaagaggucugagagcuaggggugggg	chr1:220703121-220703195	Smooth Muscle Cell Aorta	SRR5127217	1	1	0	0
JHU_ID_01264	JHU_ID_01264.3p		auggcuggcuucuccgcgag	cgcggaggagccggcggcgc	cgcggaggagccggcggcgcccauggcuggcuucuccgcgag	chr1:220786926-220786968	Neuron iPSC	SRR1777168	4	4	0	0						MARCH1
JHU_ID_01265	JHU_ID_01265.3p		gccgaggacagcuggagagcucu	agccgcuuguuaguccgaggccc	agccgcuuguuaguccgaggcccaggacggccgaggacagcuggagagcucu	chr1:220818847-220818899	RPE/Choroid	ERR973609	3	3	0	0						MARCH1
JHU_ID_01266	JHU_ID_01266.5p	JHU_ID_01266.3p	ucugggcguggugagaaguuca	aacuucucauuaugccuucuggagu	aacuucucauuaugccuucuggaguuaucccauacgcucugggcguggugagaaguuca	chr1:221076660-221076719	T cell leukemia	SRR1292463	272	267	0	5	TJU_CMC_MD2.ID00275.3p-miR
JHU_ID_01267	JHU_ID_01267.5p/.3p		aggcgggggauuagcucag	gagugugcacccggucuag	gagugugcacccggucuaggccuguuuguguuggccucgccaggcgggggauuagcucag	chr1:22114583-22114643	Thyroid	SRR1291267	24	24	0	0
JHU_ID_01268	JHU_ID_01268.5p		cggagcucuugguucuggc	cacuuggccaaguuucccuu	cggagcucuugguucuggcucugccacuuggccaaguuucccuu	chr1:22159418-22159462	Skin	SRR1259230	44	44	0	0
JHU_ID_01269	JHU_ID_01269.5p	JHU_ID_01269.3p	agcgguugcuucauaggagaga	ucuccuaugaagcaaccgcugc	agcgguugcuucauaggagagaaaacuaauguuaguuuucucuccuaugaagcaaccgcugc	chr1:221668203-221668265	Adrenal	SRR944034	400	371	0	29		Ago_1951
JHU_ID_01271	JHU_ID_01271.3p		ucgccccuggcugcgcgcucau	uagcgcguggccccgggccgcg	uagcgcguggccccgggccgcggcucggagcggaagcgucgccccuggcugcgcgcucau	chr1:221742709-221742769	Macrophage	SRR1532975	20	20	0	0
JHU_ID_01272	JHU_ID_01272.3p		gcggcgcgcggcggucaggc	gugaccguggcgcggaaguag	gugaccguggcgcggaaguaggugagcagcagggcggcgcgcggcggucaggc	chr1:221742919-221742972	T cell leukemia	SRR1532970	3	3	0	0
JHU_ID_01273	JHU_ID_01273.3p	JHU_ID_01273.5p	agaaucuguugguaaagccucu	aggcucuaccaacagaugcacugu	aggcucuaccaacagaugcacugugcuaccuguguuuccagaaucuguugguaaagccucu	chr1:221813952-221814013	Epithelium Renal Cortex	SRR5127204	1312	1309	1	2
JHU_ID_01274	JHU_ID_01274.3p	JHU_ID_01274.5p	cuugugcccagauggccugaag	gucaggccucugagcccaagcca	gucaggccucugagcccaagccaagccaucgcauccccugugacuugugcccagauggccugaag	chr1:221965925-221965990	Biliosphere	ERR842917	2	1	0	1						RP11-815M8.1
JHU_ID_01275	JHU_ID_01275.5p		cugccucucuggagcacugagucu	gcucagugcugagagaggaucau	cugccucucuggagcacugagucuuacuucaguuugguuugacagugcucagugcugagagaggaucau	chr1:22221005-22221074	Neuron Dopaminergic	SRR5127234	2	2	0	0
JHU_ID_01276	JHU_ID_01276.3p	JHU_ID_01276.5p	uaguggccaguggcgaucucauu	agagaucgacucugugagcucccu	agagaucgacucugugagcucccugugagauagacugcagcuaguggccaguggcgaucucauu	chr1:222392806-222392870	Fibroblast Periodonal ligament	SRR5127227	29	19	0	10
JHU_ID_01277	JHU_ID_01277.3p		ggagagguggaugagugg	acuuaauccugcugcuag	acuuaauccugcugcuaggucagaugcacagcacacaugugucgaccuggagagguggaugagugg	chr1:222444782-222444848	SkinDermis	SRR1259224	5	5	0	0		Ago_1954
JHU_ID_01278	JHU_ID_01278.5p		ucuggucugcucacacccugag	cuggugugugcaacccucugg	ucuggucugcucacacccugagcuugcugguguucuggugugugcaacccucugg	chr1:22256091-22256146	Colon adenocarcinoma	SRR1917323	2	2	0	0
JHU_ID_01279	JHU_ID_01279.3p		cuggaggaggauugugggcgg	gccccagaguaaugaggccaggg	gccccagaguaaugaggccagggauuuaccuggaggaggauugugggcgg	chr1:222644066-222644116	Lung	SRR1608272	3	3	0	0						MIA3
JHU_ID_01280	JHU_ID_01280.3p		aagcucugaaaaacagggggccca	cgcccccugaauuggggccuuucc	cgcccccugaauuggggccuuuccggaggaggaagcucugaaaaacagggggccca	chr1:222644373-222644429	Epithelium Renal Proximal	SRR5127230	2	2	0	0						MIA3
JHU_ID_01281	JHU_ID_01281.5p		gccgggcugcgccgccagggu	ccugggcguggccgcug	gccgggcugcgccgccagggucacgcgacgcggugcccgucucggcgcagggucccugggcguggccgcug	chr1:2227340-2227411	Skin	SRR2174517	8	8	0	0
JHU_ID_01282	JHU_ID_01282.3p		cggcgggcgacgggcggcug	gcucccggcccgcuggc	gcucccggcccgcuggccucgcuugacuaccgcuccccgggagagggaucgccggcggcgggcgacgggcggcug	chr1:222814898-222814973	Bladder	DRR013044	6	6	0	0
JHU_ID_01283	JHU_ID_01283.3p		uauguagaucuauucccccuuga	aagggggaauauuucuacauaug	aagggggaauauuucuacauauguauacauguauauauauaauguagauauauauauauguagaucuauucccccuuga	chr1:222967104-222967183	Neuron Dopaminergic	SRR5127234	7	7	0	0						DISP1
JHU_ID_01284	JHU_ID_01284.5p		ucuuugccuugcccugcccuggaa	ccugggcucuggcagauaaaggggaa	ucuuugccuugcccugcccuggaaaggacccugggcucuggcagauaaaggggaa	chr1:223011336-223011391	Brain, Prefrontal Cortex	SRR1759212	2	2	0	0
JHU_ID_01285	JHU_ID_01285.3p		aggagcuggagagccagaugag	gagcucuccgggguuuag	gagcucuccgggguuuagaacucucacuaggagcuggagagccagaugag	chr1:223090162-223090212	Neuron iPSC	SRR1777169	3	3	0	0
JHU_ID_01287	JHU_ID_01287.3p		ggcuagagccggagugcagag	cuguaguagaaccaagcaguaccag	cuguaguagaaccaagcaguaccagggacccuuugagcccuggcuagagccggagugcagag	chr1:223219291-223219353	Testes	SRR333680	2	2	0	0
JHU_ID_01288	JHU_ID_01288.3p	JHU_ID_01288.5p	agggcagaacaaagaaug	auuuuugaucugccgaagau	auuuuugaucugccgaagaugagggcagaacaaagaaug	chr1:2232196-2232235	CD3+ T Cell Splenic	SRR5127200	4	2	0	2						SKI
JHU_ID_01289	JHU_ID_01289.3p		gcaggaguggguaaugagg	ucaauacccugggcucuucuc	ucaauacccugggcucuucucucugaugcagggcugcaccugcaugcugaccagaaagcaggaguggguaaugagg	chr1:223292282-223292358	T cell leukemia	SRR1292463	3	3	0	0						SUSD4
JHU_ID_01290	JHU_ID_01290.5p		gggcccaggccccggaaccaccgc	accuaagcuggggcuguggcccca	gggcccaggccccggaaccaccgccuucucucuggaggcccugccagcagcagugaaggccuaaccuaagcuggggcuguggcccca	chr1:2234553-2234640	Placenta	SRR822458	1	1	0	0						SKI
JHU_ID_01291	JHU_ID_01291.3p		ucuggaggaggaaaucac	gccuucuccaacuc	gccuucuccaacucaucuggaggaggaaaucac	chr1:223504820-223504853	Hepatocellular carcinoma (HepG2)	ERR738413	2	2	0	0
JHU_ID_01292	JHU_ID_01292.3p		augggcucugccaggucacaggga	ucaggaucauggauuuucugcccagaa	ucaggaucauggauuuucugcccagaaccaaacccuguaugggcucugccaggucacaggga	chr1:223757601-223757663	Bladder	SRR333672	4	4	0	0						CAPN2
JHU_ID_01293	JHU_ID_01293.3p		ugucucugccucaccuuccagu	ugggagguggcugccaug	ugggagguggcugccauggaagggcgggcagacacuuggugucaugccucgcucugaugcauucucaugucucugccucaccuuccagu	chr1:223762098-223762187	Colon adenocarcinoma	SRR1917336	273	273	0	0		Ago_1960				CAPN2
JHU_ID_01294	JHU_ID_01294.3p		ggcgcgucggggaaggagcc	cgucgggcccggaagugugcg	cgucgggcccggaagugugcggggucgcgugccgggggcugguccgcgcccucgggcgcgucggggaaggagcc	chr1:223845557-223845631	Epithelium Keratinocyte (Neonatal)	SRR5127208	1	1	0	0		Ago_1963				TP53BP2
JHU_ID_01295	JHU_ID_01295.3p		aauuguagacccaaacaccaccuu	ggugggguuuggagcuacauuucc	ggugggguuuggagcuacauuuccuugcaaaugcccacuuugaggaauuguagacccaaacaccaccuu	chr1:224043034-224043103	Coronary Endothelial Cell	SRR5127228	8	8	0	0
JHU_ID_01296	JHU_ID_01296.3p	JHU_ID_01296.5p	gcaccuggacacagcccaccucc	uggugggcugucucccaggaag	uggugggcugucucccaggaagcccucggagaggagcggugcauagggggcaccuggacacagcccaccucc	chr1:224213146-224213218	Skin	SRR2174509	3	2	0	1						RP11-365O16.3
JHU_ID_01299	JHU_ID_01299.5p		gcagaggaugaugucgaggcugaug	cuagucucuccaacaucacguauguug	gcagaggaugaugucgaggcugaugcagggggcugcacgcuagucucuccaacaucacguauguug	chr1:224625828-224625894	Hodgkin lymphoma	SRR1535276	90	90	0	0						CNIH3
JHU_ID_01300	JHU_ID_01300.3p		uuccaugaugugguucugaaa	acggaggaguuaugaugug	acggaggaguuaugaugugaagugaggcugccaguagcagccugaacccacugcacaaauuccaugaugugguucugaaa	chr1:224690949-224691029	Cervical cancer	SRR1304304	10	10	0	0						CNIH3
JHU_ID_01301	JHU_ID_01301.3p	JHU_ID_01301.5p	aagguggagacuguaguaagug	gugccuguagucccagcuacu	gugccuguagucccagcuacucgagaggcugagguggaagaaucacuuaaaccuggaagguggagacuguaguaagug	chr1:225564183-225564261	Bladder	SRR333664	4	3	0	1						ENAH
JHU_ID_01303	JHU_ID_01303.3p		cauggaugaugcaucugacguga	auagugagaugugcugag	auagugagaugugcugagcuuuucagaggaaaaguucauggaugaugcaucugacguga	chr1:225764401-225764460	Colon adenocarcinoma	SRR1917323	29	29	0	0
JHU_ID_01305	JHU_ID_01305.3p		uggggcaucucucggucu	agcucaugagcccugca	agcucaugagcccugcagcauguggggcaucucucggucu	chr1:225816533-225816573	Breast adenocarcinoma	SRR960732	30	30	0	0						EPHX1
JHU_ID_01306	JHU_ID_01306.3p		acuggggagcgguacugagg	ucagugccacuccagaccagcau	ucagugccacuccagaccagcauccuagacuggggagcgguacugagg	chr1:225844829-225844877	Placenta	SRR822458	1	1	0	0						RP11-285F7.2
JHU_ID_01307	JHU_ID_01307.5p	JHU_ID_01307.3p	ucugugcaguacucacccccucc	ugggggugggcagugcucagggc	ucugugcaguacucacccccuccgucugcucccuccaaggugugggggugggcagugcucagggc	chr1:225846172-225846237	Cervical cancer	SRR1304304	84	74	0	10	TJU_CMC_MD2.ID00279.5p-miR	Ago_1986				TMEM63A
JHU_ID_01308	JHU_ID_01308.3p		aggguguuugagguggaacaag	auuuccaaaguccuccuccacccugc	auuuccaaaguccuccuccacccugcucucccaucaccacuuagagagcacaaaaggguguuugagguggaacaag	chr1:225852801-225852877	Platelet	SRR1592249	11	11	0	0						TMEM63A
JHU_ID_01309	JHU_ID_01309.5p		agggacagccccacucugccu	gcacucuggguguugccccugg	agggacagccccacucugccucuugcuccuccagggcagcaccaugcagccccuguggcucugcugggcacucuggguguugccccugg	chr1:225889020-225889109	Epithelium Colonic Epithelium (flow)	SRR5127219	2	2	0	0						RP4-559A3.7
JHU_ID_01310	JHU_ID_01310.5p	JHU_ID_01310.3p	uccgcucgcgacuggagggc	cccuguggcagcuuggcgugag	uccgcucgcgacuggagggcggaacuccgggcuggagucccggaagccccuguggcagcuuggcgugag	chr1:225924402-225924471	Fibroblast Dermal (adult)	SRR5127205	2	1	0	1
JHU_ID_01311	JHU_ID_01311.3p		aacccuggcuuuccccugcag	gccagggcugagagccugguccc	gccagggcugagagccuggucccccaacccuggcuuuccccugcag	chr1:22595184-22595230	Brain, Prefrontal Cortex	ERR409879	2	2	0	0						EPHA8
JHU_ID_01312	JHU_ID_01312.5p		uuggccuggguuuggauaugac	cuucucuaggcuggggcuaaca	uuggccuggguuuggauaugacauacuucucuaggcuggggcuaaca	chr1:225998751-225998798	Dendritic	SRR1708910	3	3	0	0						SDE2
JHU_ID_01313	JHU_ID_01313.3p		gcgccuggugucucagagag	gcgugaggggcggggcguug	gcgugaggggcggggcguuggaagaugcucgcgucaucaagaggcgccgggcgaguugcggcgccuggugucucagagag	chr1:225999337-225999417	Placenta	SRR822459	1	1	0	0
JHU_ID_01314	JHU_ID_01314.3p		agaggagcuccccaacccgag	gagaguguggggagagaagcugcag	gagaguguggggagagaagcugcagucccggaagcgguuuuagggggccgcuuccuuggccuagaggagcuccccaacccgag	chr1:225999749-225999832	Neuron Cortical	SRR5127209	2	2	0	0
JHU_ID_01315	JHU_ID_01315.3p		uucccgccugcgcgcucggccaag	uggccgcugcggcagcgggaggg	uggccgcugcggcagcgggaggggcggaccgacggccuccuucccgccugcgcgcucggccaag	chr1:226062029-226062093	Colon adenocarcinoma	SRR1917337	4	4	0	0						H3F3A
JHU_ID_01316	JHU_ID_01316.5p		gcgccgcggcgguugcugcug	ggggagccgccgccgcca	gcgccgcggcgguugcugcuguugggcugaggcggcgagagacgggggagccgccgccgcca	chr1:226062975-226063037	Cervical cancer	SRR1575597	2	2	0	0						H3F3A
JHU_ID_01318	JHU_ID_01318.3p		uccuggcuagucguccgcgaccg	gcgcgggcggaggaaggaagggcg	gcgcgggcggaggaaggaagggcggcucuaggggcguccuggcuagucguccgcgaccg	chr1:226110788-226110847	Epithelium Keratinocyte (Neonatal)	SRR5127208	1	1	0	0
JHU_ID_01320	JHU_ID_01320.5p/.3p		ccugucagagugggucucaccc	gugggucucacccugcacacugag	gugggucucacccugcacacugagugggucucacccugcacacugagugggccucacccugucagagugggucucaccc	chr1:226134219-226134298	Cervical cancer	SRR1304304	89	89	0	0		Ago_1992
JHU_ID_01321	JHU_ID_01321.3p		cagguuggagcuagagcug	gcuucccagccaggc	gcuucccagccaggcaggugacccaagcaaccuaaggggucgccuccccagguuggagcuagagcug	chr1:22616770-22616837	Breast adenocarcinoma	SRR873382	2	2	0	0
JHU_ID_01322	JHU_ID_01322.5p/.3p		aggcuggagggcuccgggagagg	ccugcugaccucugaccucc	ccugcugaccucugaccuccgcuuaccgacaccggaacuuccgcugcugaggaggcuggagggcuccgggagagg	chr1:226186729-226186804	Myoblast Skeletal Muscle	SRR1200890	1	1	0	0
JHU_ID_01323	JHU_ID_01323.5p/.3p		aggcugaguuggcugcug	ccgggauacugaggcccu	aggcugaguuggcugcugccuucuuucacuuuggccaggagagcagugagagcacagugcacccgggauacugaggcccu	chr1:226355978-226356058	Skin	SRR2174525	1219	1219	0	0		Ago_1993
JHU_ID_01324	JHU_ID_01324.3p		cuuugugucccugacauggcc	ccaaaagccagggacauuggug	ccaaaagccagggacauugguggccagguuguuguccacggaaccucucccuuugugucccugacauggcc	chr1:226379821-226379892	Brain, Prefrontal Cortex	ERR409883	4	4	0	0						PARP1
JHU_ID_01325	JHU_ID_01325.5p	JHU_ID_01325.3p	ccagguugcuuaaggaggggugaac	uucaaaacucccguucugauc	ccagguugcuuaaggaggggugaacugacucaggucaaaaacggagcaguucaaaacucccguucugauc	chr1:226425489-226425559	SkinDermis	SRR1259218	2	1	0	1
JHU_ID_01326	JHU_ID_01326.5p		guuccaucacgccuggcuaau	uagccaggcuggucucaaac	guuccaucacgccuggcuaauuuuuguauuuuuaguagagacgggguuucacuauguuagccaggcuggucucaaac	chr1:226427877-226427954	Skin	SRR2174521	2	2	0	0
JHU_ID_01327	JHU_ID_01327.5p		gcggaggggcggggagggcg	ccuuccccgcccccuccccc	gcggaggggcggggagggcggcgcgacacccggugacagcgcucugacgccccuccucgccaggccccuuccccgcccccuccccc	chr1:226548642-226548728	Brain, Prefrontal Cortex	SRR1759217	1	1	0	0
JHU_ID_01328	JHU_ID_01328.3p		ccagggaggggcggggcucagg	uggagcccugcaaacauccagcagggg	uggagcccugcaaacauccagcagggggcuugugaaggagggccuccagggaggggcggggcucagg	chr1:226570050-226570117	Plasma	SRR822447	1	1	0	0						C1orf95
JHU_ID_01329	JHU_ID_01329.3p		ugcagggaauuaugaguggauggc	ccucuucacaacucccugggcu	ccucuucacaacucccugggcugcuuggcacuggggacccuccccgccaggccuggcccaacaccugcagggaauuaugaguggauggc	chr1:226597116-226597205	Brain, Prefrontal Cortex	ERR409888	2	2	0	0						C1orf95
JHU_ID_01330	JHU_ID_01330.3p		accugggugccuccacug	cugcugugcacgccaccucc	cugcugugcacgccaccuccaugcgccauacguggacaccugggugccuccacug	chr1:226639774-226639829	Macrophage	SRR1532975	2	2	0	0						ITPKB
JHU_ID_01331	JHU_ID_01331.3p		ucaccccaccucugcucuggag	ggagagcagaggagcggggguggga	ggagagcagaggagcgggggugggaugacucaccccaccucugcucuggag	chr1:226643284-226643335	T cell leukemia	SRR1532969	2	2	0	0						ITPKB
JHU_ID_01332	JHU_ID_01332.3p		uaggggcgggcucucaccugcac	gcaggcgaaagccacccagagc	gcaggcgaaagccacccagagcuccuaggugcuaggggcgggcucucaccugcac	chr1:226644441-226644496	Dendritic	SRR1708912	4	4	0	0						ITPKB
JHU_ID_01334	JHU_ID_01334.3p		uagguggacugcugacauugc	gaugguggcagcugccuggg	gaugguggcagcugccuggggauccuuuaggaggcugagaaauucuucagccaggccuuuagguggacugcugacauugc	chr1:226681964-226682044	Bladder	SRR333672	2	2	0	0
JHU_ID_01336	JHU_ID_01336.5p		aggcggguaggagaaaugcgg	uauuuucuccccaccgccacu	aggcggguaggagaaaugcggagaccucgucucucccuauuuucuccccaccgccacu	chr1:226738824-226738882	Colon adenocarcinoma	SRR1917330	7	7	0	0
JHU_ID_01337	JHU_ID_01337.5p	JHU_ID_01337.3p	ggagcguccggcuuaguc	acaagcucucugcucucacug	ggagcguccggcuuagucacucuucccucugccugggggagugaagucacaagcucucugcucucacug	chr1:226815113-226815182	Colon adenocarcinoma	SRR1917331	3	2	0	1
JHU_ID_01338	JHU_ID_01338.5p		ccuggcucuguggguggguggcugu	ugucgcccauccuugggggccggcguc	ccuggcucuguggguggguggcugugcugccgcugcugucgcccauccuugggggccggcguc	chr1:2268159-2268222	Platelet	SRR1592248	1	1	0	0						SKI
JHU_ID_01339	JHU_ID_01339.3p		aaacaggaagccucugccacc	aggcuaaggaugcuuguuuug	aggcuaaggaugcuuguuuuguguggcgccauccucaaaacaggaagccucugccacc	chr1:226939624-226939682	Retina	ERR973608	4	4	0	0		Ago_2002				ADCK3
JHU_ID_01340	JHU_ID_01340.5p/.3p		ccgggcccagggcuggcaggagg	uuaagccagccuugggcaccaggg	uuaagccagccuugggcaccagggacaguggggacguggcugugcaccgggcccagggcuggcaggagg	chr1:2269673-2269742	Platelet	SRR1592248	4	4	0	0						SKI
JHU_ID_01342	JHU_ID_01342.3p		gcugccugacacagacccu	ggcaccaggcagugu	ggcaccaggcaguguggugcugccugacacagacccu	chr1:226984496-226984533	BrainFrontal	SRR448331	1	1	0	0						ADCK3
JHU_ID_01343	JHU_ID_01343.3p		uuggaaugaguucaaucu	acgauuucguccugag	acgauuucguccugagaucacagcaacaagcugaucauuuggaaugaguucaaucu	chr1:227029159-227029215	SkinDermis	SRR1259220	144	144	0	0
JHU_ID_01344	JHU_ID_01344.5p		uaggcugcaagaagggaa	cccuaaaguggccugag	uaggcugcaagaagggaaggggcgccccacaacccuaaaguggccugag	chr1:22712406-22712455	Retina	ERR973601	2	2	0	0						EPHB2
JHU_ID_01345	JHU_ID_01345.3p		aacccacugaaaggucugagccu	gccggccuuuccggggauua	gccggccuuuccggggauuaaaaacccacugaaaggucugagccu	chr1:2272207-2272252	Hepatocellular carcinoma (HepG2)	ERR738413	2	2	0	0						SKI
JHU_ID_01346	JHU_ID_01346.5p/.3p		cccccaggaugcagggagccu	gauggucuuggucccugggggag	gauggucuuggucccugggggaggcaccuucuccggaggccacagcccccaggaugcagggagccu	chr1:227729650-227729716	SkinDermis	SRR1259220	6	6	0	0						SNAP47
JHU_ID_01347	JHU_ID_01347.3p		uggcugcucuuccuucaccu	cugggggaugggcauaagucugg	cugggggaugggcauaagucugggacucagggguccugguuccaaaccagcccuccugcucuggcugcucuuccuucaccu	chr1:227747442-227747523	Neuron iPSC	SRR1777161	2	2	0	0
JHU_ID_01348	JHU_ID_01348.3p		cuucagugcccuguugaaugcccu	guuugggcagcagggcacugaagcc	guuugggcagcagggcacugaagccagccguggcuucaguggcuggcuucagugcccuguugaaugcccu	chr1:227753744-227753814	Dendritic	SRR1708907	2	2	0	0
JHU_ID_01349	JHU_ID_01349.5p/.3p		uggggcugugggcccagc	ggggcccugcagcccagcc	ggggcccugcagcccagccuggccucauuacuggcaagguggggcugugggcccagc	chr1:22782558-22782615	Coronary Endothelial Cell	SRR5127228	4	4	0	0
JHU_ID_01350	JHU_ID_01350.5p		cacccuggggucugaggg	cucacucuggggucugggg	cacccuggggucugagggacacagccucacucuggggucugggg	chr1:227903450-227903494	Biliosphere	ERR842905	1	1	0	0
JHU_ID_01351	JHU_ID_01351.3p		ugggcgccugacucucag	uccugucuccuggugucccgga	uccugucuccuggugucccggaggggccuugcugggcugggcccuccaccgccccauugggcgccugacucucag	chr1:2279090-2279165	Brain, Frontal Cortex	SRR553572	2	2	0	0						SKI
JHU_ID_01352	JHU_ID_01352.5p		accuccagucuggcccugcg	ugggcagaugagguca	accuccagucuggcccugcgcaggguugggugggcagaugagguca	chr1:227914561-227914607	SkinDermis	SRR1259218	140	140	0	0
JHU_ID_01355	JHU_ID_01355.3p		uaaaagauggacucuccaggcac	gccucacaauggucucuuuaggc	gccucacaauggucucuuuaggcccagcucaugcuaaaagauggacucuccaggcac	chr1:227969332-227969389	Testes	SRR333688	10	10	0	0
JHU_ID_01356	JHU_ID_01356.3p		ggggcuggacagccgugcgca	cgcagaggccggccccag	cgcagaggccggccccagcgcucucucggagcacagccugggugguuacggcgugugagauuggggcuggacagccgugcgca	chr1:228083690-228083773	B Cell_Pre-germinal center	SRR060983	1	1	0	0						ARF1
JHU_ID_01357	JHU_ID_01357.5p		agcggagcugaggguugg	aauugaggcugugccuc	agcggagcugaggguugggguagcaggcaguuggaggagcuccccaacccccacacccaauugaggcugugccuc	chr1:228100103-228100178	Breast adenocarcinoma	SRR960732	2	2	0	0
JHU_ID_01358	JHU_ID_01358.3p		cggcgagcaggugaccuccg	ggacgaagccuaggugggcgggg	ggacgaagccuaggugggcggggccugcgggggcgcuguggcgguacaagaacccaggcggggccggcgagcaggugaccuccg	chr1:228109426-228109510	Thyroid	SRR1291269	11	8	3	0
JHU_ID_01359	JHU_ID_01359.3p		ccgggcuggguccugcucugcu	uugauuuugacccugcgugugguggg	uugauuuugacccugcguguggugggccucgguuucgucuuugcaugaaagaggucgguccugaggccccgggcuggguccugcucugcu	chr1:228141002-228141092	Breast adenocarcinoma	SRR873383	2	2	0	0						GUK1
JHU_ID_01360	JHU_ID_01360.5p		accggccuuggggcagcccug	gggcagagugaccuuaagaagggcca	accggccuuggggcagcccugucaggcccaccagugccaugcugguuguggguuggcagggcagagugaccuuaagaagggcca	chr1:228143214-228143298	Biliosphere	ERR842903	1	1	0	0						GUK1
JHU_ID_01361	JHU_ID_01361.5p/.3p		ugugggaccugggguggggcugc	gcccugaccccaggccccacc	ugugggaccugggguggggcugcaugggcucacugugcccugaccccaggccccacc	chr1:228148309-228148366	Astrocytes	SRR5127214	15	15	0	0	TJU_CMC_MD2.ID00285.3p-miR	Ago_2022				GUK1
JHU_ID_01362	JHU_ID_01362.5p/.3p		aggacacuggucagagcuggc	ccggcucugaccgguguccuga	ccggcucugaccgguguccugagauaccaggacaccaggacacuggucagagcuggc	chr1:228152441-228152498	Red Blood Cell	SRR5127232	21	21	0	0		Ago_2024				GJC2
JHU_ID_01363	JHU_ID_01363.5p	JHU_ID_01363.3p	aggaaaggucuagcagaggcuc	ugcccugccuugccuuuccuggg	ugcccugccuugccuuuccuggggaagugccaggaaaggucuagcagaggcuc	chr1:228178836-228178889	Red Blood Cell	SRR5127232	4	3	0	1						IBA57
JHU_ID_01366	JHU_ID_01366.3p		ggugaugaugagacuggcugau	cggcucuccuuccaccug	cggcucuccuuccaccuggauguuucaggucagugcuuuggggguacuaacuuuguagaggugaugaugagacuggcugau	chr1:228246776-228246857	Breast adenocarcinoma	SRR873382	354	354	0	0						OBSCN
JHU_ID_01367	JHU_ID_01367.5p		ggugaugaugagacuggcugaug	ugagacuccaccucuccacuucuc	ggugaugaugagacuggcugauggacuccacggccuccagugcccuuuccaugagacuccaccucuccacuucuc	chr1:228256965-228257040	T cell leukemia	SRR1292461	2862	2862	0	0						OBSCN
JHU_ID_01368	JHU_ID_01368.5p	JHU_ID_01368.3p	aggcgggugaggaggugaca	caccccugacccugccggaaag	aggcgggugaggaggugacaccugagaauuccucccucucaccccugacccugccggaaag	chr1:228269589-228269650	T cell leukemia	SRR1292463	12	11	0	1						OBSCN
JHU_ID_01372	JHU_ID_01372.3p		ucccuguggggucugguccc	gucuggcaccucccaggguuu	gucuggcaccucccaggguuuggucccuguggggucugguccc	chr1:228281725-228281768	Thyroid	SRR1658408	1	1	0	0
JHU_ID_01378	JHU_ID_01378.3p		acccugggugguagauuugu	ggaucugggaagccccaggggag	ggaucugggaagccccaggggagaauuuggaggucaggagggacccugggugguagauuugu	chr1:228401589-228401651	Colon adenocarcinoma	SRR1917331	2	2	0	0
JHU_ID_01381	JHU_ID_01381.3p	JHU_ID_01381.5p	gcggcugagacuggaggacgugc	acguccccgcccccagugcc	acguccccgcccccagugccuccuggcggcugagacuggaggacgugc	chr1:228463823-228463871	Retina	ERR973606	3	2	0	1
JHU_ID_01382	JHU_ID_01382.5p		uccggaggucauuuaucugcccu	ggcagauaauuuaccucuccaca	uccggaggucauuuaucugcccuagcuggggcagauaauuuaccucuccaca	chr1:228465613-228465665	Neuron Cortical	SRR5127209	72	72	0	0
JHU_ID_01383	JHU_ID_01383.5p/.3p		gugggcuggggacggggcggg	ugcacggacccgcccugcau	gugggcuggggacggggcgggaaauggccugcgugggccuccuccgcugcucucauccugcacggacccgcccugcau	chr1:228486809-228486887	Embryonic kidney	SRR515902	2	2	0	0						RP5-915N17.11
JHU_ID_01384	JHU_ID_01384.3p		acggccgggccgggccgggcu	ccccgcggccccgggcuggcggugu	ccccgcggccccgggcuggcggugucggcugcaauccggcgggcacggccgggccgggccgggcu	chr1:228643955-228644020	Lung	SRR372638	1	1	0	0
JHU_ID_01385	JHU_ID_01385.5p		uuuccccuuacuugagccuuggc	caaggcucaagugaggggaaaug	uuuccccuuacuugagccuuggcauagaucuacaacacuaggauaccuaugccaaggcucaagugaggggaaaug	chr1:228762090-228762165	Brain, Prefrontal Cortex	SRR1759212	1	1	0	0	TJU_CMC_MD2.ID00286.3p-miR
JHU_ID_01386	JHU_ID_01386.5p		ugcccuguaggggaagccugu	agguucccucugcggggugca	ugcccuguaggggaagccugugaguggcgcgcacagcgcagguucccucugcggggugca	chr1:228830695-228830755	Placenta	SRR822454	1	1	0	0
JHU_ID_01387	JHU_ID_01387.3p		ccuggggcuguggccugcucuu	cagcaggccagagcugcucaca	cagcaggccagagcugcucacauggcugugcgcugugcagcugccuggggcuguggccugcucuu	chr1:228867250-228867315	Brain, Prefrontal Cortex	SRR1759220	1	1	0	0
JHU_ID_01388	JHU_ID_01388.5p		ggggcuguggagguggcaugucc	aggcgccuccugcacccccu	ggggcuguggagguggcauguccuggagcaacguggccuggaggcgccuccugcacccccu	chr1:2289924-2289985	Myoblast Skeletal Muscle	SRR1200834	1	1	0	0						SKI
JHU_ID_01389	JHU_ID_01389.5p		gacagcuugcugacagaacu	uggaucuuucaugcaggaugcuug	gacagcuugcugacagaacuccuauagcaucugcuuuagaguggaucuuucaugcaggaugcuug	chr1:229098068-229098133	RPE/Choroid	ERR973609	2	2	0	0
JHU_ID_01390	JHU_ID_01390.3p		cuuugggaagcgaaccugccu	gcagguccuuccgcauccag	gcagguccuuccgcauccagcccuguggcguggcuuugggaagcgaaccugccu	chr1:229129768-229129822	Hepatocellular carcinoma (HepG2)	ERR738414	19	19	0	0
JHU_ID_01391	JHU_ID_01391.3p		ucaggcugugcccccagagcu	cccuggagggugcaguuuaagg	cccuggagggugcaguuuaagggcuuaggagcuccuugcccucaggcugugcccccagagcu	chr1:229159705-229159767	Dendritic	SRR1708914	1	1	0	0
JHU_ID_01392	JHU_ID_01392.5p		agcacaggaaggacccaggcc	ccugggccacuccuggcuca	agcacaggaaggacccaggccccagaccaucacccaccccagggcugggcccugggccacuccuggcuca	chr1:22917302-22917372	Bladder	SRR333668	2	2	0	0
JHU_ID_01393	JHU_ID_01393.3p		uggcguccucagcagccucuga	aguucagggcagcugggcccggc	aguucagggcagcugggcccggccagcagcagcucauggcuggcguccucagcagccucuga	chr1:229225391-229225453	Colon adenocarcinoma	SRR1917330	3	3	0	0						RP5-1061H20.5
JHU_ID_01394	JHU_ID_01394.5p		uuccccagaauuuagggcugug	caggccugauuucaugggguaauu	uuccccagaauuuagggcugugguacagacccaggccugauuucaugggguaauu	chr1:229327930-229327985	Colon adenocarcinoma	SRR1917335	2	2	0	0						CCSAP
JHU_ID_01395	JHU_ID_01395.5p		gcggccgggaccaagagcag	gcggggaccggggcugcug	gcggccgggaccaagagcagaggcggggaccggggcugcug	chr1:229342666-229342707	Lung	SRR1608272	1	1	0	0						CCSAP
JHU_ID_01400	JHU_ID_01400.5p/.3p		ccaacucaaccucaaaacggcc	ccgguucugagguugaguucguc	ccgguucugagguugaguucgucaggguuccgacccaaugcugaccaacucaaccucaaaacggcc	chr1:229553675-229553741	Blood	SRR837476	17	17	0	0	TJU_CMC_MD2.ID00288.3p-miR
JHU_ID_01403	JHU_ID_01403.5p		cagggcugaggugcggaggga	ucgcugcgugucagcucagcu	cagggcugaggugcggagggaccacugagaggacuucgcugcgugucagcucagcu	chr1:229559262-229559318	T cell leukemia	SRR1292463	19	19	0	0
JHU_ID_01404	JHU_ID_01404.3p		ccucugacuggcaugcgguucc	aggcauucccguccagugaggg	aggcauucccguccagugagggagguugagccuccccucugacuggcaugcgguucc	chr1:229999890-229999947	Bladder	SRR333674	3	3	0	0
JHU_ID_01405	JHU_ID_01405.3p		agugaugcugagguacagga	cugugcccuaaagguggaggugc	cugugcccuaaagguggaggugccauuucaucuccgagaaguggagaaagauugugcagugaugcugagguacagga	chr1:230084993-230085070	Bladder	DRR013042	3	2	1	0						GALNT2
JHU_ID_01406	JHU_ID_01406.5p		uggcugcugggagugagccauu	cuuuucuaacccagccgggccagg	uggcugcugggagugagccauuugcugggccagggauuugcccugcugcagggacuuuucuaacccagccgggccagg	chr1:230096048-230096126	Retina	ERR973618	2	2	0	0						GALNT2
JHU_ID_01407	JHU_ID_01407.5p	JHU_ID_01407.3p	acagggcacuggguuucuguggu	cucagugucuguaucucc	acagggcacuggguuucugugguggaggcaaccauugauacucagugucuguaucucc	chr1:230119494-230119552	T cell leukemia	SRR1292458	29	26	0	3						GALNT2
JHU_ID_01408	JHU_ID_01408.3p		acaucuguggagcggaaguccug	gguuucccuucuguguga	gguuucccuucugugugagagcgucacuuucucucacaucuguggagcggaaguccug	chr1:230155159-230155217	T cell leukemia	SRR1292461	3	3	0	0						GALNT2
JHU_ID_01409	JHU_ID_01409.5p		cggggggcgaggcccgcggaggc	uugcggggugugcgcucccccac	cggggggcgaggcccgcggaggcucuuucuugcggggugugcgcucccccac	chr1:23019758-23019810	Lung non-small cell cancer	SRR1013972	517	517	0	0	TJU_CMC_MD2.ID00081.3p-miR					KDM1A
JHU_ID_01410	JHU_ID_01410.3p		gccuggugccgagcuuccccgag	cggaccagccggcgcaagcgg	cggaccagccggcgcaagcgggcgaagguaaggcucgacccuucccucaaacgacaccgccuggugccgagcuuccccgag	chr1:23019921-23020002	Plasma	SRR822444	1	1	0	0						KDM1A
JHU_ID_01411	JHU_ID_01411.3p		aggggcuuggugggcagc	ugaccccaggcccagga	ugaccccaggcccaggaaaaggggcuuggugggcagc	chr1:230249569-230249606	Thyroid	SRR1658402	1	1	0	0						GALNT2
JHU_ID_01412	JHU_ID_01412.5p		ccgggaagggccgcuggcuucc	gagcccgcgggcccuaagcu	ccgggaagggccgcuggcuuccgaacagacgugguugcucuccacgaggcgcauggggagcccgcgggcccuaagcu	chr1:230322513-230322590	Neuron iPSC	SRR1777161	2	2	0	0						PGBD5
JHU_ID_01413	JHU_ID_01413.3p		uuucccagggcuccugac	caggggcccaggaaauc	caggggcccaggaaaucaauuucucuaacucuauuucccagggcuccugac	chr1:230749531-230749582	Retina	ERR973611	2	2	0	0						CAPN9
JHU_ID_01414	JHU_ID_01414.3p		uccugggucuccuccuuugucc	ucaaaggugcagacucaccucggggcu	ucaaaggugcagacucaccucggggcucggauacagcgaguccugggucuccuccuuugucc	chr1:230795095-230795157	Neuron iPSC	SRR1777166	4	4	0	0						CAPN9
JHU_ID_01415	JHU_ID_01415.5p		ucugugggcagaacugguu	ucgguguaccuaugggug	ucugugggcagaacugguuugcccuguagaggagagggaagccagacccuugacuuaggggcgcagagucgguguaccuaugggug	chr1:230856854-230856940	Bladder	DRR013044	3	3	0	0						C1orf198
JHU_ID_01416	JHU_ID_01416.3p		ugagggggcagcuguggcug	cccacagcucuugccucggc	cccacagcucuugccucggcucaccagggucacuuccacugucaggggccugagggggcagcuguggcug	chr1:2309063-2309133	Myoblast Skeletal Muscle	SRR1055962	1	1	0	0						SKI
JHU_ID_01417	JHU_ID_01417.3p		uggccgagcugggacuaccauu	ucguagucccggcaccggcaaggcggc	ucguagucccggcaccggcaaggcggccccgggcuggccgagcugggacuaccauu	chr1:230978954-230979010	Smooth Muscle Cell Prostate	SRR5127222	2	2	0	0		Ago_2046
JHU_ID_01418	JHU_ID_01418.3p	JHU_ID_01418.5p	cucgccuccacccgggucuccu	gggccccggguccggguggcguc	gggccccggguccggguggcguccgcguccagcagccgggcucgccuccacccgggucuccu	chr1:231040358-231040420	Embryonic kidney	SRR1240817	24	23	0	1		Ago_2047
JHU_ID_01419	JHU_ID_01419.3p	JHU_ID_01419.5p	ucauguugcucugcuguugcc	cagcagcauggcugacuaaagaca	cagcagcauggcugacuaaagacauugacaucaugacauugucauguugcucugcuguugcc	chr1:231264808-231264870	Cervical cancer	SRR1304304	9819	9817	0	2		Ago_2049				GNPAT
JHU_ID_01420	JHU_ID_01420.5p		caggcugccccugccgguc	cccgcagcggggccaccugcu	caggcugccccugccgguccucacccgcagcggggccaccugcu	chr1:2313051-2313095	SkinDermis	SRR1259218	5	5	0	0
JHU_ID_01421	JHU_ID_01421.3p		uggggcuggaccacagggcac	ucccucgggugcaggccccacc	ucccucgggugcaggccccaccaggggcagggcagaguggggcuggaccacagggcac	chr1:2313930-2313988	Platelet	SRR1592249	1	1	0	0
JHU_ID_01422	JHU_ID_01422.5p		cgggcuggggggcgggacggg	aauuccgcccccgaaccggcggg	cgggcuggggggcgggacgggaggcccugggagcuuccugcagcgugggggcggcucccgaggugggaauuccgcccccgaaccggcggg	chr1:2314967-2315057	Myoblast Skeletal Muscle	SRR1200890	1	1	0	0
JHU_ID_01423	JHU_ID_01423.5p	JHU_ID_01423.3p	ugaggcuugagaaaacacuggu	ucuguguuuucccaagccuuccuggu	ucuguguuuucccaagccuuccuggugacugggguguguccugaggcuugagaaaacacuggu	chr1:231703845-231703908	Placenta	SRR822454	35	33	0	2
JHU_ID_01425	JHU_ID_01425.5p		ugaccccacccagcccuccagg	uggagggcuggagggggacacg	ugaccccacccagcccuccaggccagccaggauaacccuggagggcuggagggggacacg	chr1:231922656-231922716	Myofibroblast	SRR5127220	25	25	0	0		Ago_2056
JHU_ID_01426	JHU_ID_01426.5p		cucccagggaccagaggcugg	cgcccugggcucugggagcc	cucccagggaccagaggcuggagccauggcugugaugaagccgcccugggcucugggagcc	chr1:2319566-2319627	Breast ductal carcinoma	ERR372264	2	2	0	0
JHU_ID_01427	JHU_ID_01427.3p		accugcugugcuccauuu	aaggagugcagcuccugc	aaggagugcagcuccugcccaccugcugugcuccauuu	chr1:232226528-232226566	Skin	SRR1259236	6	6	0	0
JHU_ID_01428	JHU_ID_01428.3p	JHU_ID_01428.5p	aagccaacugcagucauuggacc	uccagagacuggagcugacuug	uccagagacuggagcugacuugugcaacuggccugauaagccaacugcagucauuggacc	chr1:232287797-232287857	H9 ESC	SRR1988287	23	17	0	6	TJU_CMC_MD2.ID00289.5p-miR
JHU_ID_01429	JHU_ID_01429.3p		cacggcugccuggguguca	gaacccagugccagccucugc	gaacccagugccagccucugcccucaaggagcuggguagaagcccuuccagcuccccacggcugccuggguguca	chr1:23243909-23243984	Plasma	SRR822438	3692	3692	0	0
JHU_ID_01430	JHU_ID_01430.5p	JHU_ID_01430.3p	agaaguggguguuuguaggguu	cccugcugagggccaguuacugu	cccugcugagggccaguuacuguucucuguguuggagaagagaaguggguguuuguaggguu	chr1:232538324-232538386	H9 Differentiated Midbrain	SRR1988302	8	7	0	1		Ago_2060				SIPA1L2
JHU_ID_01431	JHU_ID_01431.5p		ugcagcgcuggacgucugaggcc	cuguggacacacuggcgcccacacaga	ugcagcgcuggacgucugaggccugugucguccccacagacgcgcgcuguggacacacuggcgcccacacaga	chr1:2326922-2326995	Thyroid	SRR1658402	1	1	0	0
JHU_ID_01432	JHU_ID_01432.3p		uuaagggcauccugacagccu	gccucagggugccaguaagu	gccucagggugccaguaagugaguuacuuaagaguacuuaagggcauccugacagccu	chr1:232765646-232765704	Islet Beta Cell	SRR873410	11	11	0	0
JHU_ID_01433	JHU_ID_01433.3p		cggagcggguuguacggucuc	guccccgguccgcgcc	guccccgguccgcgccugcgcauucagcccucggcauuggcgccugugccgcggcaguuccuauaggcggagcggguuguacggucuc	chr1:232950440-232950528	T cell leukemia	SRR1304307	13	13	0	0
JHU_ID_01434	JHU_ID_01434.5p		uucccuggcucuucuggccug	ggccaagugggcuccagggacca	uucccuggcucuucuggccugcucuguuugcaggccaagugggcuccagggacca	chr1:232952905-232952960	Lung Adenocarcinoma	SRR1240814	2	2	0	0						NTPCR
JHU_ID_01435	JHU_ID_01435.5p	JHU_ID_01435.3p	ucuucccaggguucugaagucu	acuuugugccuugggaggcug	ucuucccaggguucugaagucucaucaguuucaccugacuuugugccuugggaggcug	chr1:233152750-233152808	Cervical cancer	SRR1304304	37	36	0	1		Ago_2065				PCNXL2
JHU_ID_01436	JHU_ID_01436.3p		uauccccauaaaaccauaacca	guuaugguuuuauggggauaua	guuaugguuuuauggggauauauauagucccauaauuuauauauauccccauaaaaccauaacca	chr1:233163563-233163628	Blood	SRR2201546	2	2	0	0		Ago_2066				PCNXL2
JHU_ID_01437	JHU_ID_01437.3p		ugugcccugacugagaugggc	cugugcucucucaucacuga	cugugcucucucaucacugagcugggggcauaguuccugcagcuuugugcccugacugagaugggc	chr1:233178984-233179050	Prostate adenocarcinoma	SRR1810079	3	3	0	0						PCNXL2
JHU_ID_01438	JHU_ID_01438.5p	JHU_ID_01438.3p	guggcagacugugagggaaau	uuucccucccuggcugccgu	uuucccucccuggcugccguccacacaucguugguggcagacugugagggaaau	chr1:23344952-23345006	Bladder	DRR013040	47	36	0	11		Ago_419
JHU_ID_01439	JHU_ID_01439.5p		aagcugguuuacauuugacauuu	augucaaauguaaaccagcuuca	aagcugguuuacauuugacauuuuuuuuaauaaaaaauauuuaaaauaaaaaaaaugucaaauguaaaccagcuuca	chr1:233659387-233659464	Kidney	ERR038424	2	2	0	0
JHU_ID_01440	JHU_ID_01440.3p		gagugcggucggcaguag	guacgcaauacaacuccc	guacgcaauacaacucccgagaggccccgcgccgccccgcgccggggcgacucgggagugcggucggcaguag	chr1:23368921-23368994	Retina	ERR973605	4	4	0	0	TJU_CMC_MD2.ID00082.3p-miR	Ago_420				ZNF436
JHU_ID_01441	JHU_ID_01441.3p		cuucagcugcagaacucucagu	ugggagcccuguggcuggaucu	ugggagcccuguggcuggaucugagugcuccugagcuggcuucagcugcagaacucucagu	chr1:23429559-23429620	Fibroblast Dermal (neonatal)	SRR5127225	9	9	0	0						ASAP3
JHU_ID_01442	JHU_ID_01442.5p	JHU_ID_01442.3p	aagucguugcgguuuuugccuuu	aaaaaccgcaacgacuuucgca	aagucguugcgguuuuugccuuuuuuuuuuuuuuaaaaaaaaaaaaaaaaaggcaaaaaccgcaacgacuuucgca	chr1:234469035-234469111	T cell leukemia	SRR1292461	60	48	0	12		Ago_2072				TARBP1
JHU_ID_01443	JHU_ID_01443.5p		ggacagaacugugauaauuga	auuuugucacagcuguguacau	ggacagaacugugauaauugacaaagccauuuugucacagcuguguacau	chr1:23447843-23447893	Lung	SRR372616	17	17	0	0						ASAP3
JHU_ID_01444	JHU_ID_01444.5p	JHU_ID_01444.3p	cugacuucaaagcuuguguucu	acacaggcuuugaagucagacc	acacaggcuuugaagucagaccagguaugucccauuucagaccagguaugucugacuucaaagcuuguguucu	chr1:234508436-234508509	Lung cancer	SRR1013984	173	149	0	24		Ago_2075
JHU_ID_01445	JHU_ID_01445.5p		ucuggggaggagaaggucugc	gggccuuagcucugaga	ucuggggaggagaaggucugcugggaggagggccuuagcucugaga	chr1:23451719-23451765	Thyroid	SRR1291269	2	2	0	0						ASAP3
JHU_ID_01447	JHU_ID_01447.5p		cacagucugacagucugcucugaa	gagagcggugacucagccugugga	cacagucugacagucugcucugaauuucuguaggcuguaucauucuguaccugcaggagagcggugacucagccugugga	chr1:234564872-234564952	Epithelium Retinal Pigment	SRR493013	12	12	0	0
JHU_ID_01448	JHU_ID_01448.3p		agccucccggacuccucucuggc	cagagagguggggggccag	cagagagguggggggccagggagcaggcaacacaggaggacuggagccagugcacccugccagccucccggacuccucucuggc	chr1:234607404-234607488	Platelet	SRR1592245	1	1	0	0						RP4-781K5.2
JHU_ID_01450	JHU_ID_01450.5p/.3p		cgggguuggggggggaggaggg	uugccgccgccgccgccgccuuugcg	uugccgccgccgccgccgccuuugcggccgccgccgccgcuggugggggagacgcgggguuggggggggaggaggg	chr1:234609577-234609653	Thyroid	SRR1291269	33	33	0	0		Ago_2076
JHU_ID_01451	JHU_ID_01451.5p/.3p		cgcgcgcgcgggagggcggg	ggcucucccggcagcgcu	ggcucucccggcagcgcuccuucggcgcgcggggggagggggagcgcgcgcgcgggagggcggg	chr1:234610240-234610304	Skin	SRR2174517	209	209	0	0		Ago_2078
JHU_ID_01453	JHU_ID_01453.5p		gccucagacucagaguug	ucucugguucugaggcuu	gccucagacucagaguugcaccauuggcuucucugguucugaggcuu	chr1:234649638-234649685	Dendritic	SRR1708907	2	2	0	0						RP4-781K5.4
JHU_ID_01454	JHU_ID_01454.5p		ucccuggggggauugugg	ccaagcuugccuagguagu	ucccuggggggauuguggugggugccuggccuccucucccaccagcgcacugccccaagcuugccuagguagu	chr1:234758535-234758608	Breast adenocarcinoma	SRR029054	3	3	0	0						PP2672
JHU_ID_01455	JHU_ID_01455.3p		acugccccagcugacagcccuuc	ggggcuccuagccagggcaauca	ggggcuccuagccagggcaaucagagagucacucuugcugacugccccagcugacagcccuuc	chr1:234761313-234761376	Blood	SRR2061747	1	1	0	0
JHU_ID_01456	JHU_ID_01456.3p		caggggcaaccugaacuccugagc	ucaggagccaugggccccauguu	ucaggagccaugggccccauguuuggaacucugacccacacaggggcaaccugaacuccugagc	chr1:234875651-234875715	Hepatocellular carcinoma (HepG2)	ERR738411	4	4	0	0
JHU_ID_01457	JHU_ID_01457.3p		augcugggcucuggagagcaggc	cugcuuucccaggugggguaugu	cugcuuucccaggugggguauguugucauccugcagucaugcugggcucuggagagcaggc	chr1:234899200-234899261	Lung	SRR1216823	1	1	0	0
JHU_ID_01458	JHU_ID_01458.3p		ucgcucugcccuccacccauc	uguguguggaaggcggaggagaca	uguguguggaaggcggaggagacacuguuugggaugucgcucugcccuccacccauc	chr1:234912027-234912084	Skin	SRR2174513	7	7	0	0	TJU_CMC_MD2.ID00291.3p-miR
JHU_ID_01459	JHU_ID_01459.3p		accugaggcucugaccccu	gggcacaguguggcuuuagcuag	gggcacaguguggcuuuagcuagauucuuugaacuuggagucaaaccugaggcucugaccccu	chr1:234980734-234980797	Dendritic	SRR1708921	2	2	0	0						RP11-443B7.3
JHU_ID_01460	JHU_ID_01460.5p		uguccaggggcuggagugcagu	ugcagccucgaacuccugggcuca	uguccaggggcuggagugcaguggcuugaucauaacuaacugcagccucgaacuccugggcuca	chr1:235056780-235056844	Hepatocellular carcinoma (HepG2)	ERR738414	2	2	0	0
JHU_ID_01461	JHU_ID_01461.3p		uuuggccuuguguagauauauu	uauaucuacacaaggcuaaaga	uauaucuacacaaggcuaaagaaagagaacagccaaguguacuguggauauaucuguucucuuccuuuggccuuguguagauauauu	chr1:235190033-235190120	Epithelium Keratinocyte (Neonatal)	SRR5127208	1	1	0	0						MIR4753
JHU_ID_01462	JHU_ID_01462.3p		gccugcccucuuccacaucu	guguggcuggcacuccu	guguggcuggcacuccuccacggccugcccucuuccacaucu	chr1:235425076-235425118	SkinEpidermis	SRR1259212	16	16	0	0						TBCE
JHU_ID_01463	JHU_ID_01463.3p	JHU_ID_01463.5p	augagcccagcgccuggcug	aggcuggucuugaacuccugaccuc	aggcuggucuugaacuccugaccucgugauccgcccgcccuggccccccaaagugcugggauuacaagcaugagcccagcgccuggcug	chr1:235447928-235448017	H9 Differentiated Mesenchymal	SRR1988295	3	1	0	2						TBCE
JHU_ID_01464	JHU_ID_01464.3p		gcuggcggcugaagggca	aacuucagagccagagc	aacuucagagccagagcucccaaagcagaaagcgcuggcggcugaagggca	chr1:235503758-235503809	CD3+ T Cell Splenic	SRR5127200	4	4	0	0						B3GALNT2
JHU_ID_01465	JHU_ID_01465.3p		agguccuggggccgggcggguug	gcccgccugcgccuccggggccggc	gcccgccugcgccuccggggccggcccugcaggugagguccuggggccgggcggguug	chr1:235504114-235504172	Dendritic	SRR1708915	2	2	0	0						B3GALNT2
JHU_ID_01467	JHU_ID_01467.3p		gaccccuacccugaagccacc	uggccaggguagggaggccu	uggccaggguagggaggccuuaggcuuccuggggaccccuacccugaagccacc	chr1:23553870-23553924	Skin	SRR1259236	5	5	0	0	TJU_CMC_MD2.ID00083.3p-miR
JHU_ID_01468	JHU_ID_01468.5p		cccggaugucugagcucuggcucc	ggcucgcagcccauccggagc	cccggaugucugagcucuggcuccgcucuggcuccggcucccuccgcagccugcgggcggggcucgcagcccauccggagc	chr1:23554840-23554921	Hepatocellular carcinoma (HepG2)	ERR738417	7	7	0	0		Ago_422
JHU_ID_01470	JHU_ID_01470.3p		uugguugguugguugguugguug	agaucacgccauugcauuccagcc	agaucacgccauugcauuccagccugggugacaagagcgagacuccaucuuaaaaaaaaaagagucagacugauagcagcuagguugguugguugguugguugguug	chr1:235692341-235692448	Bladderepithelium	DRR013035	6	5	1	0						LYST
JHU_ID_01471	JHU_ID_01471.5p		cgggaccgccgggcugaggg	gccagcucggggcguccucucuggc	cgggaccgccgggcugagggcgcgagggcgcgagggcacucggccugacgcgccagcucggggcguccucucuggc	chr1:235866649-235866725	Skin	SRR1259230	7	7	0	0
JHU_ID_01472	JHU_ID_01472.3p		cggccgccgggcgccgacgcugc	agagggggagugcgcggcggccgca	agagggggagugcgcggcggccgcagcugccacaaaccagguaaaggcggccgccgggcgccgacgcugc	chr1:235866812-235866882	Dendritic	SRR1708909	6	6	0	0
JHU_ID_01473	JHU_ID_01473.3p		ucugagacuagagcaaagcccu	agacuuaguucuaguccuaguac	agacuuaguucuaguccuaguacugguauuaaccagcucugagacuagagcaaagcccu	chr1:235906752-235906811	Breast adenocarcinoma	SRR873382	1585	1585	0	0	TJU_CMC_MD2.ID00292.3p-miR	Ago_2092
JHU_ID_01474	JHU_ID_01474.3p		aucagcugccaucuggaucug	gaccagcuggcgcacagauca	gaccagcuggcgcacagaucacagagcccugcagugaucagcugccaucuggaucug	chr1:235918268-235918325	Dendritic	SRR1708916	4	4	0	0
JHU_ID_01475	JHU_ID_01475.5p		agaccccagcaaggcaaaccuga	aggguuggucuugauggggccaca	agaccccagcaaggcaaaccugagccauucuugggacaggguuggucuugauggggccaca	chr1:235941577-235941638	Dendritic	SRR1708914	4	4	0	0	TJU_CMC_MD2.ID00293.3p-miR
JHU_ID_01476	JHU_ID_01476.3p		ucuccccugagcucuagccucccu	ggaggugccucaggagcugucaaggagg	ggaggugccucaggagcugucaaggaggacacaggccagcugugggcaggcucuuguccucuccccugagcucuagccucccu	chr1:236015666-236015749	Skeletal Muscle Cell	SRR5127202	3	3	0	0						NID1
JHU_ID_01477	JHU_ID_01477.3p		gaggagagggggcugccaggggcg	ccccuccgcuccccuccccu	ccccuccgcuccccuccccuauuucccggggugggaacgccgggaggcgggaggagagggggcugccaggggcg	chr1:236065148-236065222	B cell lymphoblastoid	SRR1304313	3	3	0	0						NID1
JHU_ID_01478	JHU_ID_01478.5p		cccgggcugccucaucuuca	cugaugagcagccagcc	cccgggcugccucaucuucaucccacucucucagcacgagccugaugagcagccagcc	chr1:236176495-236176553	Retina	ERR973611	2	2	0	0						GPR137B
JHU_ID_01479	JHU_ID_01479.5p		auugaggauguagcuguuugga	caaacaauuacauccucaguau	auugaggauguagcuguuuggagccuggacuucaaacaauuacauccucaguau	chr1:236278347-236278401	Islet Beta Cell	SRR873401	92	92	0	0		Ago_2096
JHU_ID_01481	JHU_ID_01481.3p		aggcugguguuaggcugaggug	ccucucccacugccugg	ccucucccacugccuggaugguggccguagacugugcaggcugguguuaggcugaggug	chr1:236487084-236487143	Breast adenocarcinoma	SRR029054	1	1	0	0
JHU_ID_01482	JHU_ID_01482.3p		uccacaggccagagggccagcag	guugguacauaccucuacugugggca	guugguacauaccucuacugugggcaagcuccacaggccagagggccagcag	chr1:236539630-236539682	Immort. Mammary Epi	SRR433867	2	2	0	0
JHU_ID_01483	JHU_ID_01483.5p		cugcucugugcugccuuagaga	uguaaggcaguacagagcgucc	cugcucugugcugccuuagagauaauaguguguaaggcaguacagagcgucc	chr1:236728965-236729017	H7 ESC	SRR1636959	1	1	0	0						ACTN2
JHU_ID_01488	JHU_ID_01488.5p	JHU_ID_01488.3p	uggaagaggauaggguuguuc	acaacccuauccucuuccaga	uggaagaggauaggguuguucuauaaagguacugcuaggaacaacccuauccucuuccaga	chr1:237573517-237573578	BrainPrefrontalCortex	SRR1759215	419	403	0	16		Ago_2102
JHU_ID_01489	JHU_ID_01489.5p	JHU_ID_01489.3p	guagaauaagugggaggccccu	aggugaaauaccacuacucugauu	guagaauaagugggaggccccuggugccccccugucccagcaaggggacagaguggggcaaggccagaggugaaauaccacuacucugauu	chr1:237603309-237603400	Lung	SRR372618	33	27	0	6		Ago_2103
JHU_ID_01490	JHU_ID_01490.3p		gggccucgggccgucggucu	gccgccuggggcuugg	gccgccuggggcuuggggcgggcggggcagggugcguguggggccucgggccgucggucu	chr1:23778718-23778778	Dendritic	SRR1708909	1	1	0	0						PITHD1
JHU_ID_01491	JHU_ID_01491.3p		gcagggcauagggacuguaggg	cacaggaccugagcuugcug	cacaggaccugagcuugcuggagacaggcagaggcagggcauagggacuguaggg	chr1:23792366-23792421	Lung	SRR1608281	2	2	0	0						LYPLA2
JHU_ID_01492	JHU_ID_01492.3p		agcucaggucuaggaggc	aagggagguguggguucu	aagggagguguggguucuaggagagcucaggucuaggaggc	chr1:23793408-23793449	Skin	SRR1259236	2	2	0	0						LYPLA2
JHU_ID_01493	JHU_ID_01493.3p		auagcugccagugccucuacu	acgaggacacuugggcugagg	acgaggacacuugggcugagggagccacagggggcuggcugggguuuucuauagcugccagugccucuacu	chr1:23793783-23793854	Blood	SRR837476	1	1	0	0						LYPLA2
JHU_ID_01494	JHU_ID_01494.3p		ccccaccccucuccccucacc	ggaggagagagaggggucaugag	ggaggagagagaggggucaugagggcacagcucacucaccggccaccccuacccccuacccccccaccccucuccccucacc	chr1:23794135-23794217	Brain, Cerebellum	SRR553573	2	2	0	0		Ago_425				LYPLA2
JHU_ID_01495	JHU_ID_01495.3p		ucuggccaugucaccccugcagu	ugcaggcaggcaggcugagg	ugcaggcaggcaggcugagggcauugccaaggacuaaaaccaguagagcaaccucuggccaugucaccccugcagu	chr1:23798229-23798305	Neuron Cortical	SRR5127209	14	14	0	0		Ago_426				GALE
JHU_ID_01496	JHU_ID_01496.3p		cagcucgcggauuccauccaga	aggguggagccguguagaggguggc	aggguggagccguguagaggguggccagguggccagcucgcggauuccauccaga	chr1:23802087-23802142	SkinDermis	SRR1259222	5	5	0	0						HMGCL
JHU_ID_01497	JHU_ID_01497.3p		cugaggccucugggagaaucu	aagucccaaaucaaggugucagca	aagucccaaaucaaggugucagcaggauugguuccuucugaggccucugggagaaucu	chr1:23815363-23815421	Brain, Prefrontal Cortex	ERR409887	2	2	0	0						HMGCL
JHU_ID_01499	JHU_ID_01499.5p		gccaaaugggcugaugaccuccau	gggaguaucgguccuuucgaggcau	gccaaaugggcugaugaccuccaucauagcuucuuacccuggguccauggguaggcuuggaugggaguaucgguccuuucgaggcau	chr1:23888397-23888484	T cell leukemia	SRR1304307	12	12	0	0						CNR2
JHU_ID_01500	JHU_ID_01500.5p		ucugcugaaggugacgug	cucccuccuucagcacu	ucugcugaaggugacguguaccaaccccuugaaggcccucaagggagcugcacucccuccuucagcacu	chr1:2390055-2390124	Colon adenocarcinoma	SRR1917329	3	3	0	0
JHU_ID_01502	JHU_ID_01502.5p	JHU_ID_01502.3p	acucagccuccuggacagcca	uggcuauccuccaggcuggugu	acucagccuccuggacagccagguucaguuucauaugguggcuauccuccaggcuggugu	chr1:239568094-239568154	Lung cancer	SRR1013983	18	15	0	3		Ago_2108
JHU_ID_01503	JHU_ID_01503.3p		gagcagugagguagguucuggugg	cccuggccucaccuccacgugcugua	cccuggccucaccuccacgugcuguacagagcagugagguagguucuggugg	chr1:239587171-239587223	Testes	SRR333678	1	1	0	0
JHU_ID_01505	JHU_ID_01505.3p		gcugaggaggugccucugu	agaaggucucaguca	agaaggucucagucagucggggcugucccggugccgggcagcucugauguuagggcugaggaggugccucugu	chr1:239663086-239663159	Skin	SRR1259236	2	2	0	0						CHRM3
JHU_ID_01506	JHU_ID_01506.3p		cguggaacccgggcgccaggccugu	agggcggggccgaggaugcgcuga	agggcggggccgaggaugcgcugaccguggaacccgggcgccaggccugu	chr1:2400467-2400517	Neuron iPSC	SRR1777168	4	4	0	0						RER1
JHU_ID_01507	JHU_ID_01507.5p		ucugggggauucuggugacu	ucaccagaaucccccagaagg	ucugggggauucuggugacuguguccgaaagucaccagaaucccccagaagg	chr1:240229014-240229066	Fibroblast Dermal (adult)	SRR5127205	1	1	0	0
JHU_ID_01508	JHU_ID_01508.3p		cugggcugugguggguggug	ccacgccggccgcaaucgcuguu	ccacgccggccgcaaucgcuguucuguuacccgcagcauugggggagcugugcugggcugugguggguggug	chr1:2402363-2402435	Platelet	SRR1592244	1	1	0	0						RER1
JHU_ID_01509	JHU_ID_01509.3p	JHU_ID_01509.5p	uagccucugcacuuggaucuuc	ugauccaagcacagagucuacu	ugauccaagcacagagucuacuugaguacugaaauagccucugcacuuggaucuuc	chr1:240551129-240551185	Lung Adenocarcinoma	SRR1304309	4	3	0	1
JHU_ID_01510	JHU_ID_01510.3p		uucccguccugcgccucccagu	uggaagggagcgggaaagggagaa	uggaagggagcgggaaagggagaagggguccaacccacccccuucccguccugcgccucccagu	chr1:24071252-24071316	Skeletal	SRR1820680	1	1	0	0						RP11-293P20.4
JHU_ID_01511	JHU_ID_01511.3p		ucacugcagucucucccacccgg	cuguugcccaggcugcagugacu	cuguugcccaggcugcagugacugguguggucucugcucacugcagucucucccacccgg	chr1:240761115-240761175	Retina	ERR973601	4	4	0	0
JHU_ID_01513	JHU_ID_01513.3p		ggucccgggugacucugauuu	auuagggggucucugaggguccaa	auuagggggucucugaggguccaaccaucucggucccgggugacucugauuu	chr1:24089668-24089720	Lung non-small cell cancer	SRR1013972	3	3	0	0
JHU_ID_01514	JHU_ID_01514.3p		ccccugucugagggggga	caaccugaugggggga	caaccugauggggggagggacaucccugcuuucugaacccccugucugagggggga	chr1:24108328-24108384	Brain, Prefrontal Cortex	SRR1759212	18	18	0	0
JHU_ID_01515	JHU_ID_01515.3p		gauaaaagacuguuugcucuggu	ugggcacagucuucucug	ugggcacagucuucucugggucucucagguaauagaccagcugauaaaagacuguuugcucuggu	chr1:241308488-241308553	Epithelium Retinal Pigment	SRR493013	11	11	0	0
JHU_ID_01516	JHU_ID_01516.5p		gaggcugagaacccugcuccggcg	uuggaaaugcagaacuggaccucgu	gaggcugagaacccugcuccggcgcaggcuucaucugggagcuuguuggaaaugcagaacuggaccucgu	chr1:2415787-2415857	B cell lymphoblastoid	SRR1304313	2	2	0	0
JHU_ID_01517	JHU_ID_01517.3p		ggcugggcaccuuccgcuggucggc	cggcuagcucgccccgcccc	cggcuagcucgccccgcccccacuggcugggcaccuuccgcuggucggc	chr1:241640526-241640575	Lung Adenocarcinoma	SRR1304309	5	5	0	0
JHU_ID_01518	JHU_ID_01518.5p	JHU_ID_01518.3p	auggcuucugcucuugugucaucu	augacucaagagacagccgugu	augacucaagagacagccguguugaggaguguggucaccaagauggcuucugcucuugugucaucu	chr1:241647915-241647981	Smooth Muscle Cell Prostate	SRR5127222	19	11	0	8
JHU_ID_01519	JHU_ID_01519.5p/.3p		aggcugggauuguuggguug	gcccagcuucccagccucc	aggcugggauuguuggguuggggggcacuaagggugggcccugcccagcuucccagccucc	chr1:2417371-2417432	Testes	SRR333682	5	5	0	0		Ago_102
JHU_ID_01520	JHU_ID_01520.3p		acccccucucccuuuccugua	cgggagaggaggcgagggccauuc	cgggagaggaggcgagggccauucuuauccaagaacccccucucccuuuccugua	chr1:24195900-24195955	Dendritic	SRR1708906	2	2	0	0
JHU_ID_01521	JHU_ID_01521.5p		ucucaaauuugaaaucug	ggcagcacaugagaag	ucucaaauuugaaaucuggaagcucuuugggcagagugagaggacucagcccuagagccaggcagcacaugagaag	chr1:242519865-242519941	Plasma	SRR822443	172	172	0	0
JHU_ID_01522	JHU_ID_01522.5p		ggaggggccgcggcuggc	cgccgccgccccucccg	ggaggggccgcggcuggcccagccagcccgcgccugcagguuggugcagugaggagccgccgccgccccucccg	chr1:242524751-242524825	Lung	SRR1608285	1	1	0	0	TJU_CMC_MD2.ID00296.3p-miR	Ago_2121
JHU_ID_01523	JHU_ID_01523.5p/.3p		ccgggcuccccgggccgc	uccccagcccucggug	uccccagcccucgguguccaccuagaaccgggcuccccgggccgc	chr1:242525278-242525323	Heart	ERR038426	2	2	0	0
JHU_ID_01524	JHU_ID_01524.5p	JHU_ID_01524.3p	ugcccgggccaguuucgaacuc	guugucgggauuacaggugugagggac	ugcccgggccaguuucgaacuccugaguugaggcgaucuucucaccuuggccaucagaguugucgggauuacaggugugagggac	chr1:243101036-243101121	Retina	ERR973608	2239	2213	25	1		Ago_2123
JHU_ID_01525	JHU_ID_01525.5p		acggugccuggagcugggc	cccgccagguccugugu	acggugccuggagcugggcggucuucucgucagaguggggacuggugagagcgaccuccccgccagguccugugu	chr1:243101625-243101700	Kidney	SRR553575	1	1	0	0
JHU_ID_01526	JHU_ID_01526.3p		cagggcugcgggcuccaggcacc	gcccaggaucccuugcgcccugcg	gcccaggaucccuugcgcccugcgguagcccggggcugcccagggcugcgggcuccaggcacc	chr1:24321866-24321929	Islet Beta Cell	SRR1028925	2	2	0	0						GRHL3
JHU_ID_01528	JHU_ID_01528.3p		cccgcugggaacuguaguccu	cacuacaacuccuagcaugcc	cacuacaacuccuagcaugcccagcaaccggaccuucacuuggaguuggcgcucugcccgcugggaacuguaguccu	chr1:243255482-243255559	Dendritic	SRR1708913	6	6	0	0
JHU_ID_01529	JHU_ID_01529.3p	JHU_ID_01529.5p	ccuggguucugccccguccacgc	agugggcgggagcagaccaggugc	agugggcgggagcagaccaggugcguuuccuaacaccuggguucugccccguccacgc	chr1:243256289-243256347	Colon adenocarcinoma	SRR1917323	3	2	0	1	TJU_CMC_MD2.ID00297.5p-miR	Ago_2125				SDCCAG8
JHU_ID_01530	JHU_ID_01530.3p		agcggcccccucugucuccagg	ugugggacgguggggcuggccaccugg	ugugggacgguggggcuggccaccugggcaggccacuuacccagcggcccccucugucuccagg	chr1:24342052-24342116	Colon adenocarcinoma	SRR1917337	18	18	0	0						GRHL3
JHU_ID_01531	JHU_ID_01531.5p		auugucagaggcuuuagguuccugu	uggagcuugaagagcugaaagugu	auugucagaggcuuuagguuccugucagaggcagcugugcuggagcuugaagagcugaaagugu	chr1:243477664-243477728	Colon adenocarcinoma	SRR1917330	2	2	0	0
JHU_ID_01533	JHU_ID_01533.5p	JHU_ID_01533.3p	ucucucagggcuucugaccaaa	aagucaguauccugagauagc	aagucaguauccugagauagcugauuucaaaagagcucucucagggcuucugaccaaa	chr1:243796276-243796334	Lung Adenocarcinoma	SRR1304309	21	20	0	1		Ago_2129
JHU_ID_01534	JHU_ID_01534.5p/.3p		gugggguggggggaggacagg	uugcccucccgccggccgcaccg	uugcccucccgccggccgcaccgggcuccaggaggccagaggcucugugggguggggggaggacagg	chr1:243850164-243850231	Platelet	SRR1592246	3	3	0	0		Ago_2132
JHU_ID_01535	JHU_ID_01535.3p		uccucccgggcugcgccucgcu	cggggcgcgcccggcgcggggagg	cggggcgcgcccggcgcggggagggguucugcggccuccucccgggcugcgccucgcu	chr1:243850470-243850528	Lung Adenocarcinoma	SRR1013979	814	814	0	0	TJU_CMC_MD2.ID00298.3p-miR	Ago_2133
JHU_ID_01536	JHU_ID_01536.3p		aggggcuggcucucggcgac	cgccgcggggcuuguuguuga	cgccgcggggcuuguuguugacuuugaggaaaacuccugacgucaggggcuggcucucggcgac	chr1:243850601-243850665	T cell leukemia	SRR1292461	7	7	0	0
JHU_ID_01539	JHU_ID_01539.5p		uucgcuccgccgcgcuccucc	aggggcgggggggagcgggcg	uucgcuccgccgcgcuccuccggcugccagcgggggugggcgggagggaggggcgggggggagcgggcg	chr1:244048765-244048834	Placenta	SRR822458	1	1	0	0
JHU_ID_01540	JHU_ID_01540.3p		cuuggugggaauugcaga	gacaaauccagcuaagac	gacaaauccagcuaagacaguggagggaguugguuacgucuuggugggaauugcaga	chr1:244153387-244153444	SkinDermis	SRR1259220	877	877	0	0
JHU_ID_01541	JHU_ID_01541.3p		ugagggggugcucguauuu	guaggagcagcuccaucug	guaggagcagcuccaucugcccuucuaauacauaggugggagacugagggggugcucguauuu	chr1:244442961-244443024	Endothelial Aortic	SRR5139121	26	26	0	0						ADSS
JHU_ID_01542	JHU_ID_01542.3p		aggccucgggcgguagcuccu	ggguucugccgucgcgccgggucucc	ggguucugccgucgcgccgggucuccgcccgcagucggaagaguugggagcaggccucgggcgguagcuccu	chr1:244451212-244451284	Skin	SRR2174509	4	4	0	0						ADSS
JHU_ID_01543	JHU_ID_01543.3p		cccggcgggcggcugcaggcg	ccucggccacucccguccaggcc	ccucggccacucccguccaggccucgcgcauucccgugggacgucggcccggcgggcggcugcaggcg	chr1:244461334-244461402	Cervical cancer	SRR1304304	3	3	0	0
JHU_ID_01545	JHU_ID_01545.3p		accagccuggcuaaacug	gagguuaggaguuc	gagguuaggaguucgagaccagccuggcuaaacug	chr1:244879261-244879296	Retina	ERR973602	2	2	0	0
JHU_ID_01546	JHU_ID_01546.5p	JHU_ID_01546.3p	aguucugucccagugaaggg	cccuucacugggacagaaccugc	aguucugucccagugaagggagcuuauguuccccccuucacugggacagaaccugc	chr1:244915822-244915878	Monocytic leukemia	DRR000555	10	7	0	3
JHU_ID_01549	JHU_ID_01549.5p	JHU_ID_01549.3p	cucugcaggcggccaccgcg	ugggugguccccugggagag	cucugcaggcggccaccgcgcggggcugggugguccccugggagag	chr1:244971301-244971347	Dendritic	SRR1708908	4	3	0	1						EFCAB2
JHU_ID_01550	JHU_ID_01550.5p	JHU_ID_01550.3p	aggagaucggcucucucc	aaacgagaaggucgccagag	aggagaucggcucucuccgcucccgguggaaaacgagaaggucgccagag	chr1:24502574-24502624	Dendritic	SRR1708915	3	2	0	1						RCAN3
JHU_ID_01551	JHU_ID_01551.3p		cggcgccggcagccuagcucagcc	cugggcucuggcgccugcgccgcc	cugggcucuggcgccugcgccgccgugcgcgcgcccugccagaacaggaggggacgaggcgggcgcgcggcgccggcagccuagcucagcc	chr1:24502796-24502887	Hepatocellular carcinoma (HepG2)	ERR738414	1	1	0	0						RCAN3
JHU_ID_01553	JHU_ID_01553.3p		gcaggcucugcggaagccagga	auggcuuuccacagggcccggcca	auggcuuuccacagggcccggccaagcugugggguauggcaggcucugcggaagccagga	chr1:245091947-245092007	Breast adenocarcinoma	SRR960732	22	22	0	0
JHU_ID_01554	JHU_ID_01554.3p		gaagcucccugguugauccug	gggucuggcccucggugucucuu	gggucuggcccucggugucucuuuugaagcucccugguugauccug	chr1:245750885-245750931	Skin	SRR2174541	15	15	0	0						SMYD3
JHU_ID_01555	JHU_ID_01555.5p		uagcccuggauuuugaggcugcag	gcucucuagccugggcaacaga	uagcccuggauuuugaggcugcagugagcuaugauugugcuacugcucucuagccugggcaacaga	chr1:246119053-246119119	Prostate adenocarcinoma	SRR1810079	2	2	0	0
JHU_ID_01557	JHU_ID_01557.3p		ugccaagucauuuaggauuagu	uuaaauccuacaugacucggcaaa	uuaaauccuacaugacucggcaaaauccuugucauuaggauuggcuuugccaagucauuuaggauuagu	chr1:246306786-246306855	Lung squamous carcinoma	SRR1013976	29	28	1	0
JHU_ID_01558	JHU_ID_01558.3p		uccuggguuugcuggagcg	uuuacugaggcaggccuggacu	uuuacugaggcaggccuggacucugagucuauagagugggcauggguccuggguuugcuggagcg	chr1:246382387-246382452	Retina	ERR973614	2	2	0	0
JHU_ID_01559	JHU_ID_01559.3p		agggcugugggccuagggg	ccaaggaccaugcccuuc	ccaaggaccaugcccuuccccauggggacagugagggcugugggccuagggg	chr1:246519532-246519584	Smooth Muscle Cell, Coronary	SRR5127211	1	1	0	0						RP11-690C23.2
JHU_ID_01560	JHU_ID_01560.5p		cuagucuagaggcugugga	cagggagacuucuggagccugu	cuagucuagaggcuguggagcccagggguugcccuuaguuccuggauccagggagacuucuggagccugu	chr1:246527653-246527723	Lung	SRR1608272	1	1	0	0
JHU_ID_01561	JHU_ID_01561.5p	JHU_ID_01561.3p	ucuguaaucccagcacuuugg	ugagggcuggaguuugag	ucuguaaucccagcacuuugggaggucgaagcgggcagaucacuugagggcuggaguuugag	chr1:246557013-246557075	SkinDermis	SRR1259224	8	7	0	1						TFB2M
JHU_ID_01562	JHU_ID_01562.3p		uuaccuucuagucuuugu	aagauuggcagguagac	aagauuggcagguagacuucacucaccugauaaauggcuccauuaccuucuagucuuugu	chr1:246637887-246637947	Breast ductal carcinoma	ERR372263	4	4	0	0
JHU_ID_01563	JHU_ID_01563.5p	JHU_ID_01563.3p	uaacuguauuuucugggaauag	uauccccagaaaauacaguuu	uaacuguauuuucugggaauaguauuuaauuuaaguauccccagaaaauacaguuu	chr1:246685846-246685902	Placenta	SRR822457	2	1	0	1
JHU_ID_01564	JHU_ID_01564.3p		gucaaggagaggaucuuug	aggaucuuugucaccuggcua	aggaucuuugucaccuggcuagaguuugguagaggagaggaucuuugucaccugucuagaguuuggucaaggagaggaucuuug	chr1:246712147-246712231	T cell leukemia	SRR1292458	10	10	0	0
JHU_ID_01565	JHU_ID_01565.3p		agccuguggcuguaaggcag	gccuagcugaugggcuca	gccuagcugaugggcucacuagccagacaugagaagugagccuguggcuguaaggcag	chr1:246731434-246731492	Colon adenocarcinoma	SRR1917335	2	2	0	0						SCCPDH
JHU_ID_01567	JHU_ID_01567.5p		uggcugaggguggcugug	cagcugccauguggcagcacauc	uggcugaggguggcuguggcagcugccauguggcagcacauc	chr1:246800525-246800567	T cell leukemia	SRR1292461	6	6	0	0
JHU_ID_01568	JHU_ID_01568.5p		uuaucuguaaguuuguuugccu	gcaaacaaacuuacagauaaau	uuaucuguaaguuuguuugccuuuauaaauguuacaggcaaacaaacuuacagauaaau	chr1:246996915-246996974	Lung Adenocarcinoma	SRR1013979	43	43	0	0		Ago_2154				ZNF670
JHU_ID_01569	JHU_ID_01569.3p		gccgagcugcgccagcgggacu	ucccgcugccggcccggccc	ucccgcugccggcccggcccccaccugcgcgggacgggacugagggccgagcugcgccagcgggacu	chr1:247007716-247007783	Skeletal Muscle Cell	SRR5127202	1	1	0	0						ZNF670
JHU_ID_01570	JHU_ID_01570.5p		uucugggcagcucugccucuguag	ucaggggagagucccgacuug	uucugggcagcucugccucuguagacccgcaucucccucggaucgugcggugccgacgggaggguccucaggggagagucccgacuug	chr1:247078295-247078383	Lung	SRR1608283	1	1	0	0						ZNF670
JHU_ID_01571	JHU_ID_01571.3p		cucccagcggucggcucccg	gugaguugcgccgccggggguc	gugaguugcgccgccgggggucuggagaagggaaggggcuguggcggccccgggccccgggcucccagcggucggcucccg	chr1:247126595-247126676	H9 Differentiated Midbrain	SRR1988301	5	5	0	0						ZNF124
JHU_ID_01572	JHU_ID_01572.3p		cucccagcggucggcucccg	gugaguugcgccgccggggguc	gugaguugcgccgccgggggucuggagaagggaaggggcuguggcggccccgggccccgggcucccagcggucggcucccg	chr1:247171766-247171847	Neuron iPSC	SRR1777167	1	1	0	0						ZNF124
JHU_ID_01573	JHU_ID_01573.3p		cuccugugaccugcauguacugg	acucucggcgguucaggaggc	acucucggcgguucaggaggcucugccgcagccggggcccuccugugaccugcauguacugg	chr1:247171893-247171955	Thyroid	SRR1658408	1	1	0	0						ZNF124
JHU_ID_01574	JHU_ID_01574.3p		ugucccugcggugcccuccagg	cggagggcgcugccagaggagagg	cggagggcgcugccagaggagagggcagagcgucugucccugcggugcccuccagg	chr1:2471935-2471991	Retina	ERR973608	2	2	0	0						PLCH2
JHU_ID_01575	JHU_ID_01575.3p		auauguaugcuuguguguggag	cacacacacacacauauacuauau	cacacacacacacauauacuauauauacauauauauguaugcuuguguguggag	chr1:247194459-247194513	Breast adenocarcinoma	SRR873383	1487	1487	0	0		Ago_2160
JHU_ID_01577	JHU_ID_01577.3p		cccgccgguccggaaggu	cgccgggccgggggcu	cgccgggccgggggcuuugugggucagccacgucgccgcgcccgggcuuccccgcgggcccgccgguccggaaggu	chr1:247332036-247332112	Fibroblast Dermal (adult)	SRR5127205	2	2	0	0	TJU_CMC_MD2.ID00302.5p-miR
JHU_ID_01578	JHU_ID_01578.5p/.3p		cggggcucugccaggaugcc	cccuggcaccucccuguc	cggggcucugccaggaugcccagcccuggcaccucccuguc	chr1:2475198-2475239	Retina	ERR973604	3	3	0	0						PLCH2
JHU_ID_01579	JHU_ID_01579.5p		uagacgggcugcugcugcc	cagcacaaccacagcgagg	uagacgggcugcugcugccaucagcacaaccacagcgagg	chr1:248863232-248863272	Retina	ERR973602	7	7	0	0						AL672294.1
JHU_ID_01580	JHU_ID_01580.5p		ccggcggagcucuggagaa	cgauagcgcucucccaggccggga	ccggcggagcucuggagaaagccgcgacugcaaugcagccaggaguggccgauagcgcucucccaggccggga	chr1:248873652-248873725	Cervical cancer	SRR1240812	3	3	0	0
JHU_ID_01581	JHU_ID_01581.5p		gugccggaugccguccuaggggcu	ccccuggggagguuauaaucuaguagaa	gugccggaugccguccuaggggcuggagacacugcaugaacaagacaaaaacuugggccccuggggagguuauaaucuaguagaa	chr1:24922930-24923015	CD8+ T Cell (Neonatal)	SRR1853807	2	2	0	0
JHU_ID_01582	JHU_ID_01582.3p		aucgagacccagcucuggccg	gccggcugggggcgaaaguga	gccggcugggggcgaaagugagguucugagaggaauggucagacaggcaaucaucgagacccagcucuggccg	chr1:24933656-24933729	T cell leukemia	SRR1304307	4	4	0	0
JHU_ID_01583	JHU_ID_01583.5p		ggagucagcgggagguagc	ugugaccuugagugagacucuuc	ggagucagcgggagguagcuggagaggcagggggugcagacucugucccuggcacuggcugugaccuugagugagacucuuc	chr1:24936578-24936660	SkinDermis	SRR1259218	2	2	0	0
JHU_ID_01584	JHU_ID_01584.3p		acggugggcaaaucucugauc	ucagagucaaguccacuuguca	ucagagucaaguccacuugucaauaagcaccuucugugacggugggcaaaucucugauc	chr1:24938375-24938434	B cell lymphoblastoid	SRR1304313	8	8	0	0
JHU_ID_01585	JHU_ID_01585.3p		cagggcuguggggaccugg	agagccgacagcccggc	agagccgacagcccggcagcauccagggcuguggggaccugg	chr1:2495792-2495834	CD8+ T Cell (Neonatal)	SRR1853809	1	1	0	0
JHU_ID_01586	JHU_ID_01586.5p		aagcugcagcugcucuggccc	ggcggaggcuggguuugg	aagcugcagcugcucuggcccugugugagcugcugcucugaggaagccccaggcugaggcagcuaccaggcggaggcuggguuugg	chr1:2509182-2509268	Retina	ERR973611	2	2	0	0						PANK4
JHU_ID_01587	JHU_ID_01587.3p		cccacacaaggcagaagggagagc	auuuccugccuauugaugggga	auuuccugccuauugauggggacagguguggggacagcuuaacccacacaaggcagaagggagagc	chr1:25100576-25100642	Brain, Cerebellum	SRR553573	4	4	0	0						RP4-799D16.1
JHU_ID_01588	JHU_ID_01588.5p	JHU_ID_01588.3p	caugccuggacguucucugcaa	gcggucgggguccaggcaccuc	caugccuggacguucucugcaacagcgaaugcaguugcggucgggguccaggcaccuc	chr1:2511525-2511583	Hepatocellular carcinoma (HepG2)	ERR738413	31	30	0	1						PANK4
JHU_ID_01590	JHU_ID_01590.3p		ucaggcuccugcuuugcucaug	agggcaggugggcagccucacc	agggcaggugggcagccucacccacccgggucaggcuccugcuuugcucaug	chr1:2542101-2542153	Blood	SRR2201549	1	1	0	0
JHU_ID_01591	JHU_ID_01591.3p		accugcccgggccuggccu	uccagccuggccaggagc	uccagccuggccaggagcagccccagcccaggcaccugcccgggccuggccu	chr1:2546007-2546059	CD3+ T Cell Splenic	SRR5127200	2	2	0	0
JHU_ID_01592	JHU_ID_01592.3p		auuugcacacuugccaauggcug	gcccuggccugcgggaauca	gcccuggccugcgggaaucaggaaagggugggguccagcugcauugcgaauggacuaaagccacugauuugcacacuugccaauggcug	chr1:2550311-2550400	T cell leukemia	SRR1304307	10	4	6	0						RP3-395M20.8
JHU_ID_01593	JHU_ID_01593.5p		cagagggcggcuggaggggcu	cuccuccaugucugcacuguuuggg	cagagggcggcuggaggggcucagaaaccauuuucaccuucugucuccuccaugucugcacuguuuggg	chr1:2550571-2550640	Epithelium Colonic Epithelium (flow)	SRR5127219	2	2	0	0						RP3-395M20.8
JHU_ID_01595	JHU_ID_01595.3p		aggaaggggcucuggcag	gugaggguuuccucucug	gugaggguuuccucucuguaaaaugggacagagagguaggggacaggaaggggcucuggcag	chr1:25552580-25552642	Immort. Mammary Epi	SRR433868	2	2	0	0		Ago_447				LDLRAP1
JHU_ID_01596	JHU_ID_01596.5p		cugggcaggucaggguuccgagc	cuggguccccgucugucaggc	cugggcaggucaggguuccgagcccuggguccccgucugucaggc	chr1:25565780-25565825	Islet Beta Cell	SRR1028925	3	3	0	0						LDLRAP1
JHU_ID_01597	JHU_ID_01597.5p/.3p		gccguggccucguuccugggcuggc	cagacagugggugacaggcugaucag	cagacagugggugacaggcugaucagggccacaucggggaggguggcucugccguggccucguuccugggcuggc	chr1:2557241-2557316	Dendritic	SRR1708922	4	4	0	0						TNFRSF14
JHU_ID_01598	JHU_ID_01598.5p		aaucggccgucugggauu	uccugacggcuguggcc	aaucggccgucugggauugaaagccaguccugacggcuguggcc	chr1:25572955-25572999	Colon adenocarcinoma	SRR1917330	2	2	0	0
JHU_ID_01599	JHU_ID_01599.3p		cgcaggcucggcggcagcggccg	guggaggcggccggguggcugugcg	guggaggcggccggguggcugugcgcgcguguggggcgcaggcucggcggcagcggccg	chr1:25616828-25616887	Retina	ERR973618	2	2	0	0
JHU_ID_01600	JHU_ID_01600.5p		acugaugucuggggcagaguc	cucuuccuccgacauccucu	acugaugucuggggcagagucuagcuuuuuagaaggcagacucuuccuccgacauccucu	chr1:25655583-25655643	Bladder	DRR013040	19	19	0	0						RP1-187B23.1
JHU_ID_01601	JHU_ID_01601.3p		gagcaaggagcugaacucca	gaggcuucagaaccagccac	gaggcuucagaaccagccacacgaagaccaaagugaagagcaaggagcugaacucca	chr1:2570014-2570071	Lung	SRR1216823	3	3	0	0
JHU_ID_01602	JHU_ID_01602.5p		cagagggcggcuggaggggcu	cuccuccaugucugcacuguuuggg	cagagggcggcuggaggggcucagaaaccauuuucacuuuucugucuccuccaugucugcacuguuuggg	chr1:2576652-2576722	Epithelium Colonic Epithelium (flow)	SRR5127219	2	2	0	0
JHU_ID_01603	JHU_ID_01603.3p		auuugcacacuugccaauggcug	gcccuggccugcgggaauca	gcccuggccugcgggaaucaggaaagggugggguccagcugcauugcgaauggacuaaagccacugauuugcacacuugccaauggcug	chr1:2576892-2576981	T cell leukemia	SRR1304307	10	4	6	0
JHU_ID_01604	JHU_ID_01604.5p		cuggcuucccugcugugagc	ggccagccugggcagccaucc	cuggcuucccugcugugagccugucucuccuccgugggacaggccagccugggcagccaucc	chr1:2578190-2578252	SkinDermis	SRR1259220	4	4	0	0	TJU_CMC_MD2.ID00027.5p-miR	Ago_109
JHU_ID_01605	JHU_ID_01605.5p	JHU_ID_01605.3p	gggcacgggcaggagcug	gcucuuucugugccugg	gggcacgggcaggagcugagcagcccgaagccaugagucgcugucacugcucuuucugugccugg	chr1:2578318-2578383	T cell leukemia	SRR1292463	24	19	3	2
JHU_ID_01606	JHU_ID_01606.3p		cccuucccugugagcuccuccu	uuggagcuuauagugggagacggca	uuggagcuuauagugggagacggcaaguaaacaggacccaaaacgggcaaugcccuucccugugagcuccuccu	chr1:25807193-25807267	Dendritic	SRR1708907	3	3	0	0						SEPN1
JHU_ID_01607	JHU_ID_01607.3p		aggcugagcaagcuguggcucu	ggccacggguggcucagcuucu	ggccacggguggcucagcuucugaugccuccuucguucugggguccaggcugagcaagcuguggcucu	chr1:2584142-2584210	Placenta	SRR822459	2	2	0	0						RP3-395M20.9
JHU_ID_01608	JHU_ID_01608.5p/.3p		ucaggcugugcaggagggggcccc	gggccccucuaucuucugggg	ucaggcugugcaggagggggccccucuacugucucgggcugugcaggagggggccccucuaucuucugggg	chr1:2585305-2585376	Macrophage	SRR1532975	3	3	0	0
JHU_ID_01611	JHU_ID_01611.5p/.3p		cgggggagggcgggcggccuc	ggcagcggccccgccccaag	ggcagcggccccgccccaagccgggggagggcgggcggccuc	chr1:25875558-25875600	Placenta	SRR567645	1	1	0	0
JHU_ID_01612	JHU_ID_01612.5p	JHU_ID_01612.3p	gaagcgcaggcuccggcuucuggg	agagcugcagccgcgcuucucgc	agagcugcagccgcgcuucucgcacuucgggacgacgggaagcgcaggcuccggcuucuggg	chr1:25875816-25875878	Fibroblast Dermal (neonatal)	SRR5127225	8	8	0	0
JHU_ID_01613	JHU_ID_01613.3p		gcccuccgagucgucccagcgg	gcugggaagaaaugguggugaag	gcugggaagaaaugguggugaaggaaaaagcgccagcccuccgagucgucccagcgg	chr1:25923370-25923427	Dendritic	SRR1708913	2	2	0	0
JHU_ID_01614	JHU_ID_01614.3p		ucacugccgccaacuccu	agguuggagugcaguggca	agguuggagugcaguggcauuaucacagcucacugccgccaacuccu	chr1:25962749-25962796	SkinEpidermis	SRR1259212	9	9	0	0						PAFAH2
JHU_ID_01616	JHU_ID_01616.5p		cggcaggaauguggcuccu	gggccgcgucugccccc	cggcaggaauguggcuccuugccucggaagagggucuccagaggcuacuggggccgcgucugccccc	chr1:26046459-26046526	SkinEpidermis	SRR1259212	232	232	0	0
JHU_ID_01621	JHU_ID_01621.3p		ugccguccccugccccgccggc	cggcgcggggcugggugcgaucauc	cggcgcggggcugggugcgaucaucugggaggaugccguccccugccccgccggc	chr1:26111135-26111190	Brain, Prefrontal Cortex	SRR1759213	1	1	0	0
JHU_ID_01622	JHU_ID_01622.3p		gccgggagucgucggaggug	cggccggcgcuccgcuc	cggccggcgcuccgcucgccuccucccucucucgaggauuugcagagccgggagucgucggaggug	chr1:26111639-26111705	Retina	ERR973613	2	2	0	0	TJU_CMC_MD2.ID00090.3p-miR					PDIK1L
JHU_ID_01623	JHU_ID_01623.5p		gagccccuucgcucugaggag	ccucggggcugggggcugag	gagccccuucgcucugaggagccagcccugcaguugccucaacuccucggggcugggggcugag	chr1:26112102-26112166	Red Blood Cell	SRR1664897	3	3	0	0		Ago_455				PDIK1L
JHU_ID_01624	JHU_ID_01624.5p		uggggguaggggcgaucggg	cgcuccccucccccagu	uggggguaggggcgaucgggcucaggcuacauagcccgcuccccucccccagu	chr1:26182428-26182481	Lung	SRR1608272	5	5	0	0						CNKSR1
JHU_ID_01625	JHU_ID_01625.5p	JHU_ID_01625.3p	acaacagggcguggagcucaga	ugugcuuuccacccugccugcagc	acaacagggcguggagcucagacagaaacccucugugcuuuccacccugccugcagc	chr1:26188542-26188599	Colon adenocarcinoma	SRR1917331	7	6	0	1						CNKSR1
JHU_ID_01627	JHU_ID_01627.5p	JHU_ID_01627.3p	auacuauagaggucacuaaagu	agugaccucuauaguauucucu	agugaccucuauaguauucucuuaguaacaagagaauacuauagaggucacuaaagu	chr1:26238070-26238127	Retina	ERR973615	36	24	0	12						CEP85
JHU_ID_01628	JHU_ID_01628.5p		ccugccuggcacuggcugauggg	caucagccagagcucugccaaag	ccugccuggcacuggcugaugggcaccucuguugguuccaucagccagagcucugccaaag	chr1:26281398-26281459	Dendritic	SRR1708914	5	5	0	0						UBXN11
JHU_ID_01629	JHU_ID_01629.5p/.3p		gcccagccugaucugcuc	ccaggugggugcagggcag	ccaggugggugcagggcagggccagggccacagaggggcucuggucccacugcccagccugaucugcuc	chr1:26282583-26282652	Testes	SRR333684	4	4	0	0						UBXN11
JHU_ID_01630	JHU_ID_01630.5p		agggcuggugcuaaaguuccccc	gggaguuagcauuggccucac	agggcuggugcuaaaguucccccaggagggcugggggaguuagcauuggccucac	chr1:26284087-26284142	Fibroblast Lung	SRR1988286	6	6	0	0						UBXN11
JHU_ID_01631	JHU_ID_01631.3p		agaaguagggagaaccug	guuucucuugucuggcag	guuucucuugucuggcaggugccaggcuaggacccaagccuccugcugucaccuagaaguagggagaaccug	chr1:2634466-2634538	Smooth Muscle Cell, Coronary	SRR5127211	2	2	0	0						RP13-436F16.1
JHU_ID_01632	JHU_ID_01632.3p		cagcucugcccuggccucuacagg	ugagaccgggacagcagagcuuaa	ugagaccgggacagcagagcuuaaagacagcucugcccuggccucuacagg	chr1:26345773-26345824	Placenta	SRR822457	1	1	0	0						AIM1L
JHU_ID_01633	JHU_ID_01633.5p		aggcaggcgcugggcuacuguuc	ccaguggcagcagugccugucacc	aggcaggcgcugggcuacuguucgcugucuguccuggccaguggcagcagugccugucacc	chr1:2641789-2641850	Macrophage	SRR1532975	2	2	0	0		Ago_110				TTC34
JHU_ID_01634	JHU_ID_01634.3p		ucagccccgaggagccuccuggc	cagaggcuccucggugccucgu	cagaggcuccucggugccucgugcgaguccccgccgucagccccgaggagccuccuggc	chr1:26500267-26500326	Brain, Prefrontal Cortex	SRR1759214	1	1	0	0
JHU_ID_01635	JHU_ID_01635.3p		uaccccaggcuguggagacgaga	ugguuuucuuugcccugaggcuagg	ugguuuucuuugcccugaggcuagggccagaggacaccugugugcccuaccccaggcuguggagacgaga	chr1:26530506-26530576	Epithelium Colonic Epithelium (flow)	SRR5127219	3	3	0	0						RPS6KA1
JHU_ID_01636	JHU_ID_01636.5p/.3p		cuccccagacaacccagcuccuu	gggcugggcccuuggggaguu	gggcugggcccuuggggaguuuggcuucugccagcccagacuccccagacaacccagcuccuu	chr1:26530673-26530736	Placenta	SRR822458	2	2	0	0		Ago_460				RPS6KA1
JHU_ID_01637	JHU_ID_01637.3p		acgcgugguggcucaugacugu	agacaugagccacugcgccugg	agacaugagccacugcgccuggccgaaacugagacuucaaaaagugauaugaggccacgcgugguggcucaugacugu	chr1:26533372-26533450	Colon adenocarcinoma	SRR1917336	10	10	0	0						RPS6KA1
JHU_ID_01638	JHU_ID_01638.5p		agggguugguagggagggug	cccagccuccaaaccccugu	agggguugguagggagggugagcuuuggggcuuccgagagcugccccagccuccaaaccccugu	chr1:26542209-26542273	B Cell Centrocyte	SRR060982	2	2	0	0						RPS6KA1
JHU_ID_01639	JHU_ID_01639.3p		ugccuguucugguuugaccuccc	ugggccuaaccaggccagagcauc	ugggccuaaccaggccagagcaucgugagcaauaggagcggugccuguucugguuugaccuccc	chr1:26546628-26546692	Dendritic	SRR1708918	13	13	0	0						RPS6KA1
JHU_ID_01640	JHU_ID_01640.3p		cugcgggcugucagaugcucacc	ugcugcucugggcugucagau	ugcugcucugggcugucagauucucacuugugcuugugggugcuacugcgggcugucagaugcucacc	chr1:2657545-2657613	CD8+ T Cell (Adult)	SRR1853806	266	266	0	0						TTC34
JHU_ID_01641	JHU_ID_01641.3p		acucccacugcuccacuugacuag	gguccaagugcagugguguuug	gguccaagugcagugguguuugcaacuaauugaucacaaccaguuacagauuucuuuguuccuucucuacucccacugcuccacuugacuag	chr1:26593945-26594037	Red Blood Cell	SRR1664893	186	186	0	0
JHU_ID_01642	JHU_ID_01642.5p		ugcugcgggcugucagaugcucacc	ugggugcuguuaaaggcugucaga	ugcugcgggcugucagaugcucaccugggguugugggugcuguuaaaggcugucaga	chr1:2659600-2659657	Neuron Dopaminergic	SRR5127234	6811	6811	0	0						TTC34
JHU_ID_01644	JHU_ID_01644.3p	JHU_ID_01644.5p	auuucauauggucuaacuuaau	uagguugaaccauaugaaauug	uagguugaaccauaugaaauuguugauauucgauugcuaugaaaaugacaauuucauauggucuaacuuaau	chr1:26629456-26629528	Lung non-small cell cancer	SRR1013971	3	2	0	1
JHU_ID_01645	JHU_ID_01645.5p		ugcugcgggcugucagaugcucacc	ugggugcuguuaaaggcugucaga	ugcugcgggcugucagaugcucaccugggguugugggugcuguuaaaggcugucaga	chr1:2664216-2664273	Neuron Dopaminergic	SRR5127234	6801	6801	0	0						TTC34
JHU_ID_01646	JHU_ID_01646.5p		ugcugcgggcugucagaugcucacc	ugggugcuguuaaaggcugucaga	ugcugcgggcugucagaugcucaccugggguugugggugcuguuaaaggcugucaga	chr1:2668832-2668889	Neuron Dopaminergic	SRR5127234	6811	6811	0	0						TTC34
JHU_ID_01647	JHU_ID_01647.3p		cuggguaaaauggcagugcugagc	ucuccacuccggguuugccaggcg	ucuccacuccggguuugccaggcggccgcgacggcgcuggguaaaauggcagugcugagc	chr1:26695674-26695734	Hepatocellular carcinoma (HepG2)	ERR738403	1	1	0	0
JHU_ID_01648	JHU_ID_01648.3p		ggaggaggaggaggcggcggcg	cgcugcgcucgcuccucucccccccgc	cgcugcgcucgcuccucucccccccgccccgccggcucaggcuccgggcuggcggcggcggaggaggaggaggcggcggcg	chr1:26696186-26696267	Platelet	SRR1592244	1	1	0	0						ARID1A
JHU_ID_01649	JHU_ID_01649.3p		gagggcggcggcggcggcggg	cgccuccucccgcugcugcugcucgg	cgccuccucccgcugcugcugcucggcuuucuucagcuccgagggcggcggcggcggcggg	chr1:26696447-26696508	Platelet	SRR1592249	1	1	0	0		Ago_467				ARID1A
JHU_ID_01650	JHU_ID_01650.3p		cugcgggcugucagaugcucacc	ugcugcucugggcugucagau	ugcugcucugggcugucagauucucacuugugcuugugggugcuacugcgggcugucagaugcucacc	chr1:2671955-2672023	CD8+ T Cell (Adult)	SRR1853806	286	286	0	0						TTC34
JHU_ID_01651	JHU_ID_01651.5p		ugcugcgggcugucagaugcucacc	ugggugcuguuaaaggcugucaga	ugcugcgggcugucagaugcucaccugggguugugggugcuguuaaaggcugucaga	chr1:2674010-2674067	Neuron Dopaminergic	SRR5127234	6811	6811	0	0						TTC34
JHU_ID_01652	JHU_ID_01652.3p		cugcgggcugucagaugcucacc	ugcugcucugggcugucagau	ugcugcucugggcugucagauucucacuugugcuugugggugcuacugcgggcugucagaugcucacc	chr1:2676611-2676679	CD8+ T Cell (Adult)	SRR1853806	286	286	0	0						TTC34
JHU_ID_01653	JHU_ID_01653.5p		uggagaagagagccaugaacauc	cccacauggcauucucuucucuuag	uggagaagagagccaugaacaucugcccacauggcauucucuucucuuag	chr1:26778555-26778605	Cervical cancer	SRR1532966	2	2	0	0						ARID1A
JHU_ID_01654	JHU_ID_01654.5p		augaggauggugaagaaaaccu	gcuccuuucaccucccucaccc	augaggauggugaagaaaaccucagagaacacccuccagggcuccuuucaccucccucaccc	chr1:26787316-26787378	Brain, Prefrontal Cortex	ERR409888	2	2	0	0
JHU_ID_01655	JHU_ID_01655.3p		cgggcgagcgggaugggggu	ccccgccccgcuccugcccgga	ccccgccccgcuccugcccggacuuggagcagccccgccucccugcgcggcggccauguugacuccgggcgagcgggaugggggu	chr1:26787842-26787927	BrainPrefrontalCortex	SRR1759214	11	11	0	0
JHU_ID_01656	JHU_ID_01656.3p		cugcgggcugucagaugcucacc	ugcugcucugggcugucagau	ugcugcucugggcugucagauucucacuugugcuugugggugcuacugcgggcugucagaugcucacc	chr1:2680345-2680413	CD8+ T Cell (Adult)	SRR1853806	266	266	0	0						TTC34
JHU_ID_01657	JHU_ID_01657.3p		aagcggcacucugaaagcu	cuucagaggcugcuugu	cuucagaggcugcuuguuaaacacuucauuaagcggcacucugaaagcu	chr1:26862304-26862353	Lung	SRR372642	2	2	0	0
JHU_ID_01658	JHU_ID_01658.5p		ucuccccuaggcgcuguucuugc	gggacuggcagagcugaggccaccug	ucuccccuaggcgcuguucuugcuccaaagggcuccguggagagggacuggcagagcugaggccaccug	chr1:26864044-26864113	Skin	SRR2174513	1	1	0	0						SFN
JHU_ID_01659	JHU_ID_01659.5p		agguccugaggguaugac	caugcacaguucuugg	agguccugaggguaugaccugacuaugagcucugugaggugaggacgaccaugcacaguucuugg	chr1:26887042-26887107	Skin	SRR2174513	3	3	0	0						GPN2
JHU_ID_01660	JHU_ID_01660.3p		gccucuucugacugccucugccc	gaccagagguaaagcuuagggggcca	gaccagagguaaagcuuagggggccagccugggguaccagcagcacuuaguggccucuucugacugccucugccc	chr1:26942789-26942864	Fibroblast Dermal (neonatal)	SRR5127225	1	1	0	0						NUDC
JHU_ID_01661	JHU_ID_01661.3p		cuccuccugccagcucugucacc	uaccaggcacauggcugggggaggg	uaccaggcacauggcugggggagggacugcugacccaccaaggucucacacuccuccugccagcucugucacc	chr1:27099784-27099857	Neural Stem Cell	SRR1988281	2	2	0	0		Ago_477				SLC9A1
JHU_ID_01663	JHU_ID_01663.5p/.3p		aggaggguugcgggaagggggau	ccccucuucccagcacuccccucu	ccccucuucccagcacuccccucugacuucccaggccagaggaggguugcgggaagggggau	chr1:27119275-27119337	Platelet	SRR1592247	3	3	0	0						SLC9A1
JHU_ID_01664	JHU_ID_01664.5p		cucagggcuucgcauagugc	acuaugugacggccccgaagggug	cucagggcuucgcauagugcaucauugccuucugcacuaugugacggccccgaagggug	chr1:27139443-27139502	Placenta	SRR822454	1	1	0	0						SLC9A1
JHU_ID_01665	JHU_ID_01665.3p		gggcuaggguuaguucugg	auaagugacagcgccg	auaagugacagcgccgggcucagcuaggcuucagucugcugccgccggggccggggcuaggguuaguucugg	chr1:27155085-27155157	Neuron iPSC	SRR1777161	11	10	1	0	TJU_CMC_MD2.ID00092.3p-miR
JHU_ID_01666	JHU_ID_01666.5p		uuacuguccucugggggcaggagc	uccgcucccaggagagugagg	uuacuguccucugggggcaggagccgagccuuuuuguugcuccgcucccaggagagugagg	chr1:27308150-27308211	Smooth Muscle Cell, Coronary	SRR5127211	2	2	0	0						WDTC1
JHU_ID_01667	JHU_ID_01667.3p		ccagcguccucagcagug	cugccugagcugggccaugggc	cugccugagcugggccaugggcaucagcccagcguccucagcagug	chr1:27342417-27342463	Hepatocellular carcinoma (HepG2)	ERR738416	2	2	0	0						SYTL1
JHU_ID_01668	JHU_ID_01668.5p/.3p		agggggcacugggcagacagug	aggccugccuagguuccuucc	aggccugccuagguuccuuccuggaaaccaaaggggcaccuggguccccuagggacagagggggcacugggcagacagug	chr1:27355530-27355610	Bladder	DRR013040	5	5	0	0						MAP3K6
JHU_ID_01669	JHU_ID_01669.5p/.3p		gugaggccuguaggggugguggac	ccacuucuugcuacaguccugcca	ccacuucuugcuacaguccugccaaccauucaagacagccugugcccagggcgaccagugcuuggugaggccuguaggggugguggac	chr1:27361680-27361768	Astrocytes	SRR5127214	2	2	0	0		Ago_479				MAP3K6
JHU_ID_01671	JHU_ID_01671.3p		uccccugccacuguuccucc	aggagcagagccagggcugg	aggagcagagccagggcuggacagcaccccacccuccccugccacuguuccucc	chr1:27380366-27380420	T cell leukemia	SRR1532969	2	2	0	0						CD164L2
JHU_ID_01672	JHU_ID_01672.3p		uccuccugggcucuugcaccu	gggcgggagcagagagugaggagu	gggcgggagcagagagugaggaguggcuucaggggcuccuccuccugggcucuugcaccu	chr1:27390790-27390850	Brain, Prefrontal Cortex	SRR1759217	1	1	0	0
JHU_ID_01673	JHU_ID_01673.5p		acucugaggcuugaagga	caggaggccucagucu	acucugaggcuugaaggagacacaggaggccucagucu	chr1:27399298-27399336	Smooth Muscle Cell, Coronary	SRR5127211	6	6	0	0
JHU_ID_01674	JHU_ID_01674.5p		uccccacucuucagguuguacug	guucacccugaaggugugguuu	uccccacucuucagguuguacugggaaggugagcugcaguucacccugaaggugugguuu	chr1:27420988-27421048	Lung Adenocarcinoma	SRR1013980	7	7	0	0						WASF2
JHU_ID_01675	JHU_ID_01675.5p	JHU_ID_01675.3p	uuauggcaggggcugggaauu	uuccuuccccugccagugagc	uuccuuccccugccagugagcaaguccaggcuuauggcaggggcugggaauu	chr1:27505241-27505293	Smooth Muscle Cell, Coronary	SRR5127211	104	67	0	37		Ago_484
JHU_ID_01676	JHU_ID_01676.5p	JHU_ID_01676.3p	uccccgacagccaggcucucc	cugagcuagggcuggugaggagc	cugagcuagggcuggugaggagcgugcucagaucugcuccccgacagccaggcucucc	chr1:27518007-27518065	Neuron iPSC	SRR1777166	58	49	0	9		Ago_485
JHU_ID_01677	JHU_ID_01677.5p		aagcugagguagggcccucg	ggcucccugccugccugcc	aagcugagguagggcccucguggcagccuggccccggcccccggcugucgugggcucccugccugccugcc	chr1:27527151-27527222	B Cell_Pre-germinal center	SRR060983	1	1	0	0						RP1-159A19.4
JHU_ID_01678	JHU_ID_01678.5p		cucgccuccccuuucccggca	cgagggcgagggcgacggcgaggg	cucgccuccccuuucccggcagagaagucccaggccgggcaaagggcggcgcuggggccggcgagggcgagggcgacggcgaggg	chr1:27527871-27527956	Blood	SRR2201551	1	1	0	0						RP1-159A19.4
JHU_ID_01679	JHU_ID_01679.3p	JHU_ID_01679.5p	uugggguaggacuugggcaucgg	caugcccaggccccaccccagac	caugcccaggccccaccccagacccauaaaaucggaauauuuugggguaggacuugggcaucgg	chr1:27530071-27530135	Platelet	SRR1592249	98	94	0	4		Ago_487				RP1-159A19.4
JHU_ID_01680	JHU_ID_01680.5p	JHU_ID_01680.3p	acccuggagccggagguugca	acuccagccugggcgacagagc	acccuggagccggagguugcagugaacuacgaucguaccacugcacuccagccugggcgacagagc	chr1:27541349-27541415	Skin	SRR2174513	7	6	0	1						AHDC1
JHU_ID_01681	JHU_ID_01681.5p		cugcucccugagaucccggcuccug	ugaguccucaggcuucuuugggagucagac	cugcucccugagaucccggcuccugggaucagccauggcccugaguccucaggcuucuuugggagucagac	chr1:27554549-27554620	CD8+ T Cell (Neonatal)	SRR1853809	1	1	0	0						AHDC1
JHU_ID_01682	JHU_ID_01682.5p		uccugggccucuggggagcugca	gggcuccccaagggcuugggagc	uccugggccucuggggagcugcaaaggugggggcuccccaagggcuugggagc	chr1:27561125-27561178	Neuron iPSC	SRR1777168	5	5	0	0						AHDC1
JHU_ID_01683	JHU_ID_01683.3p		ccuuggccucuggacacc	gccccagaggaggugaaggca	gccccagaggaggugaaggcacacagggcucuggugugaccuuggccucuggacacc	chr1:27563686-27563743	Colon adenocarcinoma	SRR1917329	3	3	0	0						AHDC1
JHU_ID_01685	JHU_ID_01685.3p		gcggagccgaugugggggcagau	gcacccccgccccgccucccaa	gcacccccgccccgccucccaacugcggagccgaugugggggcagau	chr1:27574999-27575046	Fibroblast strain	SRR020286	1	1	0	0						AHDC1
JHU_ID_01687	JHU_ID_01687.5p		uggaggagggugugagagca	accccacacccuccuccccg	uggaggagggugugagagcaccuacucacuggaacaggaaguagucaugaagccccuaaaccccacacccuccuccccg	chr1:27633087-27633166	T cell leukemia	SRR1292463	6	6	0	0						FGR
JHU_ID_01688	JHU_ID_01688.3p		aggugcagagcuggggcug	gguaggugagggccugc	gguaggugagggccugcagcaggugcagagcuggggcug	chr1:2787318-2787357	T cell leukemia	SRR1292463	2	2	0	0						TTC34
JHU_ID_01690	JHU_ID_01690.5p	JHU_ID_01690.3p	uuuguagcuguacacuaaggg	cuuaguguacagcuacaaaau	uuuguagcuguacacuaagggaguugggauucccuuaguguacagcuacaaaau	chr1:27876154-27876208	Lung	SRR1608284	43	31	0	12	TJU_CMC_MD2.ID00097.5p-miR					THEMIS2
JHU_ID_01691	JHU_ID_01691.5p		agggcaggguggugacugagg	ucgggauccgcucugcccgcu	agggcaggguggugacugaggaccagcuccucaugcuugaggcuguggugaugcaccucgggauccgcucugcccgcu	chr1:27879767-27879845	Kidney	ERR038423	1	1	0	0						THEMIS2
JHU_ID_01695	JHU_ID_01695.3p		augccuuccucugugccccagg	caaggcagucugggaggggugu	caaggcagucugggaggggugugggggugaggagugacaucaguugccaacaugccuuccucugugccccagg	chr1:28280644-28280717	Macrophage	SRR1532975	14	14	0	0		Ago_497				SESN2
JHU_ID_01696	JHU_ID_01696.3p		cagcuuugccuucucuccccugu	gggggagaggggcaaaugcc	gggggagaggggcaaaugccuccgggacugacacuccaggcagcuuugccuucucuccccugu	chr1:28281171-28281234	Astrocytes	SRR5127214	1	1	0	0						SESN2
JHU_ID_01698	JHU_ID_01698.3p		cucccacugcuucauuugacuag	ggucagaaugcagugggguuu	ggucagaaugcagugggguuuacaacuaauugaucacaaccacuuaagauuucuuuguuccuucuccccucccacugcuucauuugacuag	chr1:28422560-28422651	Blood	SRR2061744	753	752	1	0						PHACTR4
JHU_ID_01699	JHU_ID_01699.5p	JHU_ID_01699.3p	ucgacguuuuuucuggccuccg	gaggucggaagaaauguagaga	ucgacguuuuuucuggccuccgugagaaaaguuccacuguuggaggucggaagaaauguagaga	chr1:28429438-28429502	Colon adenocarcinoma	SRR1917336	171	170	0	1						PHACTR4
JHU_ID_01700	JHU_ID_01700.3p		gcuccccuggcccgguuccagu	cgcucccgggcugggggagccc	cgcucccgggcugggggagcccuuggccgggcugggggagcccuuggccaggcuggcuccccuggcccgguuccagu	chr1:28518072-28518149	Neuron Dopaminergic	SRR5127234	2	2	0	0		Ago_501
JHU_ID_01701	JHU_ID_01701.5p	JHU_ID_01701.3p	ccgcaccgcggcgcccgcgcagg	ugcgcgagcgcggcgggccg	ccgcaccgcggcgcccgcgcaggcgggagauucaaacugcgcgagcgcggcgggccg	chr1:28518578-28518635	Embryonic kidney	SRR1240817	16	11	0	5	TJU_CMC_MD2.ID00098.5p-miR	Ago_502
JHU_ID_01702	JHU_ID_01702.5p	JHU_ID_01702.3p	uuucugcggggcaagguggc	ucucccuugcuuucggugcagauu	ucucccuugcuuucggugcagauucugcuauuauaauuagcuuucugcggggcaagguggc	chr1:28530947-28531008	Colon adenocarcinoma	SRR1917335	9	8	0	1		Ago_503
JHU_ID_01704	JHU_ID_01704.5p	JHU_ID_01704.3p	ccguggcuuucccuuugccugca	cggggcagagagaagccaugugu	cggggcagagagaagccaugugugucugucugucacugaccguggcuuucccuuugccugca	chr1:28535808-28535870	Colon adenocarcinoma	SRR1917336	167	97	0	70
JHU_ID_01706	JHU_ID_01706.3p		ugugggcuaguuucagacagguu	uaauagugaagcuggccuaaaug	uaauagugaagcuggccuaaauguuguaaucugguauauggcaugugggcuaguuucagacagguu	chr1:28579762-28579828	Monocytic leukemia	DRR000559	904	904	0	0		Ago_504
JHU_ID_01707	JHU_ID_01707.3p		accggaccugggccugccuggc	caggcagcccagcgccaggccc	caggcagcccagcgccaggcccaaaaccggaccugggccugccuggc	chr1:28587248-28587295	T cell leukemia	SRR1304307	4	4	0	0
JHU_ID_01708	JHU_ID_01708.5p		ucagcccccucuccaugggg	cuaggagggagggauuauc	ucagcccccucuccauggggaggaagcuaagaaacucauucugaaaaccuucuaagaacccuaggagggagggauuauc	chr1:28596019-28596098	Skin	SRR1259226	11	11	0	0
JHU_ID_01709	JHU_ID_01709.3p		acccugcagcuugcgcuuuuaacug	guggcgauauugagcugugugu	guggcgauauugagcuguguguagguacacccugcagcuugcgcuuuuaacug	chr1:28643189-28643242	Islet Beta Cell	SRR873401	2	2	0	0
JHU_ID_01710	JHU_ID_01710.3p		uggacgggugcugugggucaug	ugagccaccgugcccggccugu	ugagccaccgugcccggccuguucccauuuuuuuuauggauaaugauggacgggugcugugggucaug	chr1:28647542-28647610	Fibroblast strain	SRR020286	2	2	0	0						RP11-442N24__B.1
JHU_ID_01711	JHU_ID_01711.5p	JHU_ID_01711.3p	gugggaggcuagcuuaagcaa	caggaaggccccaccaacaa	gugggaggcuagcuuaagcaacaaagcaggaaggccccaccaacaa	chr1:28648944-28648990	Macrophage	SRR1532974	3	2	0	1
JHU_ID_01713	JHU_ID_01713.5p		uccggggagccugggguaucccc	gguccggggagcaccgggcc	uccggggagccugggguauccccaaaggcgggguccggggagcaccgggcc	chr1:28669275-28669326	Nasopharyngeal carcinoma	SRR1564521	1	1	0	0		Ago_506				GMEB1
JHU_ID_01714	JHU_ID_01714.5p/.3p		agggaacgggcuuggggucu	gccucgccucucgcugg	gccucgccucucgcugggccccaggugccccugcaggaaaugcggaggcgcggggaguccagggaacgggcuuggggucu	chr1:28812676-28812756	BrainPrefrontalCortex	SRR1759212	1	1	0	0						OPRD1
JHU_ID_01715	JHU_ID_01715.3p		ugggggcagccggagcugug	aagcuugggacccagcccuuggu	aagcuugggacccagcccuuggugugggggcagccggagcugug	chr1:2884416-2884460	Adrenal	SRR944034	1	1	0	0
JHU_ID_01716	JHU_ID_01716.3p		ugccugugggugacucagcagugc	ccugcuggggcagccacguggc	ccugcuggggcagccacguggcucuagcucuguugggcugagcugccugugggugacucagcagugc	chr1:28885107-28885174	Plasma	SRR822446	4	4	0	0
JHU_ID_01717	JHU_ID_01717.5p		gggccggagcggggcgcgg	ggagcccccucccgcugcu	gggccggagcggggcgcggggcuccaggccccggagcccccucccgcugcu	chr1:28887643-28887694	Platelet	SRR1592244	1	1	0	0						EPB41
JHU_ID_01718	JHU_ID_01718.5p/.3p		accuccacccaguuucaggccug	ggcaggaggcuggguggggaag	accuccacccaguuucaggccuggaggauggucuuggcaggaggcuggguggggaag	chr1:28888376-28888433	Red Blood Cell	SRR1664897	314	314	0	0	TJU_CMC_MD2.ID00100.5p-miR	Ago_510				EPB41
JHU_ID_01719	JHU_ID_01719.3p	JHU_ID_01719.5p	cucgcucgcucccucccuccgcu	agagggaaggcgggagggcgcgcg	agagggaaggcgggagggcgcgcgccagggucgcucgcucgcucccucccuccgcu	chr1:28914569-28914625	Embryonic kidney	SRR1240816	41	38	0	3						EPB41
JHU_ID_01720	JHU_ID_01720.5p	JHU_ID_01720.3p	agagaaucgcuugaacccagg	uggggaaaaagcaaaacu	agagaaucgcuugaacccaggagguggagguugcggugagccgagaucccacuauuguacuccagccuggggaaaaagcaaaacu	chr1:29107090-29107175	Skin	SRR2174521	3	2	0	1						EPB41
JHU_ID_01722	JHU_ID_01722.3p		uacagguccugcucggcgcggc	ccgcgccgcgcggggccugggaca	ccgcgccgcgcggggccugggacacacagcgguacagguccugcucggcgcggc	chr1:29259957-29260011	Neuron iPSC	SRR1777166	2	2	0	0
JHU_ID_01723	JHU_ID_01723.5p	JHU_ID_01723.3p	ucagugccuggugccaag	uggugccaggugcugcca	uggugccaggugcugccauccagggaggggugcucagugccuggugccaag	chr1:29285097-29285148	Retina	ERR973607	5	4	0	1
JHU_ID_01724	JHU_ID_01724.5p		gccugggggugggaaggacu	gccuugccuaccccuuggccu	gccugggggugggaaggacuucacuucucuccaccaaacccagugggccuugccuaccccuuggccu	chr1:29313056-29313123	Retina	ERR973604	2	2	0	0
JHU_ID_01725	JHU_ID_01725.5p	JHU_ID_01725.3p	gguagacucuggucucuagagc	ccuagagacagggagucuggcu	gguagacucuggucucuagagcucuauccaggcccuauaauggccuagagacagggagucuggcu	chr1:29317537-29317602	Colon adenocarcinoma	SRR1917329	98	84	0	14
JHU_ID_01726	JHU_ID_01726.3p		aggauauaagaauacuuu	agaauucugggucucuugg	agaauucugggucucuugggggagagucuguuguucaggauauaagaauacuuu	chr1:29468558-29468612	Colon adenocarcinoma	SRR1917329	2201	2201	0	0
JHU_ID_01727	JHU_ID_01727.5p		ugucccaucugggucgcca	gcucacuacaugacacaca	ugucccaucugggucgccaauauuguuauugaacaauuggcucacuacaugacacaca	chr1:29568659-29568717	SkinEpidermis	SRR1259212	80	80	0	0
JHU_ID_01729	JHU_ID_01729.5p		ccuccucccggccccgccc	ccguggccgggagcggug	ccuccucccggccccgcccagccgcgcuagugcggcccugcgccgccaccuucaggccguggccgggagcggug	chr1:29707210-29707284	Lung	SRR372642	2	2	0	0
JHU_ID_01732	JHU_ID_01732.5p		accuggacauagaaacug	acaucugucccagggaa	accuggacauagaaacuguugauucacacaucugucccagggaa	chr1:30485152-30485196	H9 Differentiated Mesenchymal	SRR1988296	2	2	0	0
JHU_ID_01733	JHU_ID_01733.3p		ucccaagguagaacgguggcgg	cuccugucuccugggacc	cuccugucuccugggacccucgggcagccccuccagcuuccugggaguccaauuucccaagguagaacgguggcgg	chr1:3061764-3061840	Brain, Frontal Cortex	SRR553572	9	9	0	0
JHU_ID_01734	JHU_ID_01734.3p		cagggcggggccagggcuaggg	cuggcuggggcgguagccuauaa	cuggcuggggcgguagccuauaaaacggcgggaacugaguuacacggcaacaucagggcggggccagggcuaggg	chr1:30718110-30718185	Bladder	DRR013040	300	300	0	0						MATN1
JHU_ID_01736	JHU_ID_01736.3p		agggcaggcagagcuguggcaagag	gcugcaaacucagaccugccugcgucugc	gcugcaaacucagaccugccugcgucugcuuccugucacaggcagggcaggcagagcuguggcaagag	chr1:30756646-30756714	Thyroid	SRR1658402	1	1	0	0
JHU_ID_01737	JHU_ID_01737.5p		aggccgugguuugacugag	gagaggacacggccccu	aggccgugguuugacugagcuggaagcugagaggacacggccccu	chr1:30757088-30757133	Placenta	SRR822452	2	2	0	0
JHU_ID_01738	JHU_ID_01738.5p		cuuccuugggcuuccagaac	ucuggaaccaucagagcc	cuuccuugggcuuccagaacauucuuggguuucuggaaccaucagagcc	chr1:30775393-30775442	Blood	SRR2201549	1	1	0	0
JHU_ID_01739	JHU_ID_01739.3p		ugcugcugugagccucugccucucu	ggagggaggcugccagagag	ggagggaggcugccagagaggaggguuauguaauuuucuuugcugcugugagccucugccucucu	chr1:3078561-3078626	Brain, Prefrontal Cortex	ERR409883	7	7	0	0						PRDM16
JHU_ID_01741	JHU_ID_01741.3p		cuguguccccuuccugcuuugag	cagggcagggagggggcauguggu	cagggcagggagggggcaugugguugggcuccuuuaucucccuguguccccuuccugcuuugag	chr1:30871723-30871787	Brain, Prefrontal Cortex	SRR1759216	1	1	0	0						SDC3
JHU_ID_01743	JHU_ID_01743.3p		ugggcuggugaggaugug	uugccagccuagc	uugccagccuagcuucgugggcuggugaggaugug	chr1:3110985-3111020	Brain, Frontal Cortex	SRR553572	3	3	0	0						PRDM16
JHU_ID_01745	JHU_ID_01745.5p		cggcggcucccccgcccca	gcggcggcggagccacguggu	cggcggcucccccgccccaccccucugccguuccccccaacucccucccugucgguggcggcggcggagccacguggu	chr1:31239939-31240017	Lung	SRR372638	1	1	0	0
JHU_ID_01746	JHU_ID_01746.5p	JHU_ID_01746.3p	cucgggggccaggcacuggcg	ccacuggcugguccccaccca	cucgggggccaggcacuggcgcugacgcaggcuagcagggcgccacuggcugguccccaccca	chr1:31373220-31373283	Brain, Prefrontal Cortex	ERR409883	22	22	0	0		Ago_527
JHU_ID_01748	JHU_ID_01748.3p		ugagagggagaaggggcugcagcgg	caggcagcccccucccccucugg	caggcagcccccucccccucuggccccacacaaagaggcccugagagggagaaggggcugcagcgg	chr1:31414314-31414380	BladderEpithelium	DRR013037	8	8	0	0						SERINC2
JHU_ID_01749	JHU_ID_01749.5p		ggguuguauuuauuagau	uuaauauacaugucuu	ggguuguauuuauuagaucuccauuuuaauauacaugucuu	chr1:31417034-31417075	SkinDermis	SRR1259222	70	70	0	0						SERINC2
JHU_ID_01750	JHU_ID_01750.5p		gccugggcugcugucacugc	aguggcagccucagcccugccu	gccugggcugcugucacugcagaaauaccaguggcagccucagcccugccu	chr1:31437336-31437387	Neuron iPSC	SRR1777168	2	2	0	0
JHU_ID_01751	JHU_ID_01751.5p/.3p		ggcugguccgaaggcagug	cuccuuguucuacucu	ggcugguccgaaggcagugaguuaucucaauugacuguuaacagucaguuacagaugaacuccuuguucuacucu	chr1:31503669-31503744	B Cell Centroblast	SRR060981	40	40	0	0
JHU_ID_01753	JHU_ID_01753.3p		ccggcuccagcggcccgccc	gcgggcgccggauaaguggccgccu	gcgggcgccggauaaguggccgccuuugucucgcuuccuguuugccaggacguccagagcccggcuccagcggcccgccc	chr1:31588901-31588981	Fibroblast Lung	SRR1988286	20	20	0	0
JHU_ID_01754	JHU_ID_01754.5p		agcgaggggagaacagaaauguu	caugucugccuuucuuugcagg	agcgaggggagaacagaaauguuggggggcuauccaucaugucugccuuucuuugcagg	chr1:31668217-31668276	Skin	SRR2174525	3	3	0	0						COL16A1
JHU_ID_01757	JHU_ID_01757.5p	JHU_ID_01757.3p	caugggcaacagucuggggccgcc	aaccccagccugucucaccaaggg	aaccccagccugucucaccaagggccucccccacggcaugggcaacagucuggggccgcc	chr1:31727886-31727946	Embryonic kidney	SRR1240817	7	6	0	1						ADGRB2
JHU_ID_01758	JHU_ID_01758.3p		ccuucuucucccccaccccagc	ugaggguggggagggaggcugcugggu	ugaggguggggagggaggcugcugggugucugacacccuucuucucccccaccccagc	chr1:31735892-31735950	Brain, Prefrontal Cortex	ERR409900	8	8	0	0	TJU_CMC_MD2.ID00101.3p-miR	Ago_531				ADGRB2
JHU_ID_01759	JHU_ID_01759.3p		ucaggagaggaggaccccu	ggguccuggguccuuuccugaau	ggguccuggguccuuuccugaauuuuccugugcccucaggagaggaggaccccu	chr1:31743277-31743331	Brain, Prefrontal Cortex	ERR409898	2	2	0	0						ADGRB2
JHU_ID_01760	JHU_ID_01760.3p	JHU_ID_01760.5p	cugcacagagggggucgcucccu	agagcgacccucucuggcaguc	agagcgacccucucuggcagucggagcgggaggacugcacagagggggucgcucccu	chr1:31760881-31760938	Neural Stem Cell	SRR1988282	8	5	0	3
JHU_ID_01761	JHU_ID_01761.5p	JHU_ID_01761.3p	uguuggcaggagcagaggaugac	cugcucuccuccugccaccgca	uguuggcaggagcagaggaugacugcgcuuacagcugcucuccuccugccaccgca	chr1:31792402-31792458	Platelet	SRR1592247	142	140	0	2						SPOCD1
JHU_ID_01762	JHU_ID_01762.3p		uugccuugaagacuccuggaca	acaagugagcuuggagguucuaug	acaagugagcuuggagguucuaugugccauaauuaacauugccuugaagacuccuggaca	chr1:31919510-31919570	Dendritic	SRR1708919	4	4	0	0						PTP4A2
JHU_ID_01765	JHU_ID_01765.5p		uccgggcugaggugggaaug	cgacugccucggucccgagg	uccgggcugaggugggaauguggaauccaggcucccaaaaaugaggaugagaccggaacucccgacugccucggucccgagg	chr1:32014462-32014544	Bladder	SRR333662	3	3	0	0						KHDRBS1
JHU_ID_01766	JHU_ID_01766.3p		cgggcuguagacggagcug	gcuccaucuggagccccgug	gcuccaucuggagccccgugaggcuucaagcguggccacucuggcugguuauggggcccucgggcuguagacggagcug	chr1:3208132-3208211	Brain, Cerebellum	SRR553573	2	2	0	0						RP11-193J6.1
JHU_ID_01767	JHU_ID_01767.5p	JHU_ID_01767.3p	ucacuagaaucuggaauagauu	auuccagauuccagugacacua	ucacuagaaucuggaauagauuccauguaagccaugugggaaucuauuccagauuccagugacacua	chr1:32167448-32167515	Colon adenocarcinoma	SRR1917330	25	24	0	1	TJU_CMC_MD2.ID00105.5p-miR	Ago_542				KPNA6
JHU_ID_01768	JHU_ID_01768.3p		caaggugcauaagggacuguaguc	cuacgcgucccucuuuacgcaggg	cuacgcgucccucuuuacgcaggggcuagccgcagaucccaaggugcauaagggacuguaguc	chr1:32179522-32179585	Lung	SRR372636	11	11	0	0
JHU_ID_01770	JHU_ID_01770.5p		accccggucucccaucuugcacagg	ugugcaaagggccggggacg	accccggucucccaucuugcacagguuuaguucccucaccugugcaaagggccggggacg	chr1:32205087-32205147	Blood	SRR2201550	1	1	0	0						RP4-622L5.7
JHU_ID_01771	JHU_ID_01771.3p		agucuguuucccucuuugc	ggugagggagaggguaguu	ggugagggagaggguaguuugagcaaaggcacagacuucagucuguuucccucuuugc	chr1:32221346-32221404	Colon adenocarcinoma	SRR1917324	2	2	0	0						TMEM234
JHU_ID_01772	JHU_ID_01772.3p		gcggacugggcaugggug	cuuaggcccagcccacaccc	cuuaggcccagcccacaccccaacgugagacucuggggcggacugggcaugggug	chr1:3222640-3222695	Lung	SRR1608279	1	1	0	0
JHU_ID_01773	JHU_ID_01773.5p		caggcaguguagcugggucgcc	cgaagcuggugucgcuugcc	caggcaguguagcugggucgccucuuuccugcgaagcuggugucgcuugcc	chr1:32251520-32251571	Platelet	SRR1592248	1	1	0	0						LCK
JHU_ID_01774	JHU_ID_01774.3p		gggcuagggcucaggggcc	ugccuguggcgguuug	ugccuguggcgguuugcccaucccaggugggaggguggggcuagggcucaggggcc	chr1:32274053-32274109	CD4+ T Cell	SRR1532971	3	3	0	0						LCK
JHU_ID_01775	JHU_ID_01775.3p		cccccugccgaguuccgggc	uugguacaggcccagggggcc	uugguacaggcccagggggcccucggcggccucuccgggcugcccuugcccccugccgaguuccgggc	chr1:32291919-32291987	Dendritic	SRR1708907	1	1	0	0
JHU_ID_01776	JHU_ID_01776.3p		aagacaggacaggcacagcgg	acugugcccgaccuguuuucc	acugugcccgaccuguuuucccucuuuaagaggaagacaggacaggcacagcgg	chr1:32318236-32318290	T cell leukemia	SRR1292463	8	8	0	0						HDAC1
JHU_ID_01777	JHU_ID_01777.5p		cccuuuguucucggcgccg	ggcgaagcgaggggag	cccuuuguucucggcgccgcagcccccgcgggcgaagcgaggggag	chr1:32335770-32335816	H9 Differentiated Forebrain	SRR1988294	15	15	0	0						MARCKSL1
JHU_ID_01779	JHU_ID_01779.3p		aguggcggauggcccuguaccu	guacagggcucuccuccacucu	guacagggcucuccuccacucucgggaguuaggagaguggcggauggcccuguaccu	chr1:3244360-3244417	Neuron Dopaminergic	SRR5127234	2	2	0	0
JHU_ID_01780	JHU_ID_01780.5p		aagcagcagggcuugguccac	gggcccaguuuguccugacugccugc	aagcagcagggcuugguccacccuggcgguugggcccaguuuguccugacugccugc	chr1:3255642-3255699	Corona Radiata	ERR457736	3	3	0	0
JHU_ID_01781	JHU_ID_01781.5p		uccugauugucuggauucc	ggccaggccccaaggaca	uccugauugucuggauuccugugguucuggggggccaggccccaaggaca	chr1:3260190-3260240	Neuron Dopaminergic	SRR5127234	11	11	0	0
JHU_ID_01782	JHU_ID_01782.5p/.3p		aaagccggcgacucucugc	agagagccgccaggaccugg	aaagccggcgacucucugcccaguuugaaaaucucauggcagagagccgccaggaccugg	chr1:32695079-32695139	Cervical cancer	SRR1532965	9	9	0	0						SYNC
JHU_ID_01783	JHU_ID_01783.3p		uccucuccucugagccuccuguc	caggcugcccagggcccaaggaag	caggcugcccagggcccaaggaagcccgaggucaggggccccaacuaagcuggcuuccucuccucugagccuccuguc	chr1:32701679-32701757	Fibroblast Dermal (neonatal)	SRR5127225	1	1	0	0						SYNC
JHU_ID_01784	JHU_ID_01784.5p		ucccuggggacaggcuggaaguuu	acuuugggcccuauccacagggacu	ucccuggggacaggcuggaaguuuccuuccuggucaggugacagccuggcuccagguugaacuuugggcccuauccacagggacu	chr1:32737429-32737514	Colon adenocarcinoma	SRR1917325	2	2	0	0
JHU_ID_01786	JHU_ID_01786.5p		agcacuuccugcucugcc	cggggcaggacugggucugg	agcacuuccugcucugccaggggaucccugccccagccggggguccccuccccucacagcggggcaggacugggucugg	chr1:32742369-32742448	Dendritic	SRR1708918	4	4	0	0						KIAA1522
JHU_ID_01787	JHU_ID_01787.5p		cugagccuguaggucacugc	aguggccaggccucccuc	cugagccuguaggucacugcuccaacagccuggguuuggguucauugggucaguggccaggccucccuc	chr1:32743716-32743785	Biliosphere	ERR842905	2	2	0	0						KIAA1522
JHU_ID_01788	JHU_ID_01788.5p	JHU_ID_01788.3p	ccacucucucagcccagaggcuac	gugcaauggagcugggagaa	ccacucucucagcccagaggcuaccgcucugaggagugcaauggagcugggagaa	chr1:32753727-32753782	Thyroid	SRR1291268	3	2	0	1						KIAA1522
JHU_ID_01790	JHU_ID_01790.3p		cccacccccuaggauccaggacugg	acugaguuggggaaagagga	acugaguuggggaaagaggauaaucagugagcacuguucugcucagagcuccugaucuaccccacccccuaggauccaggacugg	chr1:32774460-32774545	RPE/Choroid	ERR973609	3	2	1	0						KIAA1522
JHU_ID_01792	JHU_ID_01792.3p		ccuggcuggacucgcgugaca	gagcgccgagcccagcugaugc	gagcgccgagcccagcugaugcaaccuggcuggacucgcgugaca	chr1:32817326-32817371	Cervical cancer	SRR1304304	18	18	0	0						YARS
JHU_ID_01793	JHU_ID_01793.5p	JHU_ID_01793.3p	cuccuagcugggauuauaggc	uaaucccagcuacucgggaggcug	cuccuagcugggauuauaggcaccggccaccugccuguaaucccagcuacucgggaggcug	chr1:32837406-32837467	Cervical cancer	SRR1304304	9	8	0	1						S100PBP
JHU_ID_01794	JHU_ID_01794.3p		cagcccugcagggaaagggg	gugaagccuucgggagccagga	gugaagccuucgggagccaggaccugccagcagccagaguucagcccugcagggaaagggg	chr1:3284534-3284595	Thyroid	SRR1658408	1	1	0	0
JHU_ID_01796	JHU_ID_01796.5p		ugaccggcgcuugucugcaga	ugcggaugcugcgcuucauc	ugaccggcgcuugucugcagaagaaggaugugcggaugcugcgcuucauc	chr1:32868358-32868408	Neuron iPSC	SRR1777169	15	15	0	0						FNDC5
JHU_ID_01797	JHU_ID_01797.5p		cagcgggggcgggagugggggcg	uccucaccccgcccccgcaccu	cagcgggggcgggagugggggcgcccuccgguccucaccccgcccccgcaccu	chr1:32870986-32871039	Myotube Skeletal Muscle	SRR1055961	3	3	0	0						FNDC5
JHU_ID_01798	JHU_ID_01798.5p		ccaccggcggcggcgggcccg	ggcccgcggcaaguugggggu	ccaccggcggcggcgggcccgcucuagaaagggaaacugaggcucugaggagccgccccgcgcgggcccgcggcaaguugggggu	chr1:32901562-32901647	Macrophage	SRR1532975	3	3	0	0
JHU_ID_01799	JHU_ID_01799.5p		aacgcaggggcccggccug	ccccgggcugggcuucu	aacgcaggggcccggccugcuguggugaccuuagccccgggcugggcuucu	chr1:32924988-32925039	Islet Beta Cell	SRR1028925	3	3	0	0
JHU_ID_01800	JHU_ID_01800.5p		agccuggcuggcuggcca	gccagccaguucaccugc	agccuggcuggcuggccaaugaauccagguccaagcuuagcggguacuuccugccgccggguccagcgccagccaguucaccugc	chr1:32992051-32992136	SkinDermis	SRR1259218	1	1	0	0						RP1-117O3.2
JHU_ID_01801	JHU_ID_01801.5p		gugcgagccacuaugccugg	gggcgugguggcucacaccu	gugcgagccacuaugccuggcccuaauuuauaaauuaaauguuaggccgggcgugguggcucacaccu	chr1:33049757-33049825	Myotube Skeletal Muscle	SRR1055963	1	1	0	0
JHU_ID_01803	JHU_ID_01803.3p		uggcaggaagagcuucugagcu	cucagaggcccugcucaca	cucagaggcccugcucacacagcccagcugcugcuguggcaggaagagcuucugagcu	chr1:3320759-3320817	Hepatocellular carcinoma (HepG2)	ERR738406	4	4	0	0
JHU_ID_01804	JHU_ID_01804.5p/.3p		auuguccugcccaggcccggc	ggggacuugggccuggcgggcc	auuguccugcccaggcccggcggccgccucgccaccccacuccugggugauggcaggcuggggacuugggccuggcgggcc	chr1:33255915-33255996	Breast ductal carcinoma	ERR372263	6	6	0	0
JHU_ID_01805	JHU_ID_01805.3p		cggcggcggcggcggcggcggga	ccgggucgccugcuguucacuuc	ccgggucgccugcuguucacuucuggguucugcaagcgccgaggcggcggcggcggcggcggcggga	chr1:33256448-33256515	Skin	SRR2174513	20	13	7	0
JHU_ID_01806	JHU_ID_01806.5p		caggacccugggagccucuuu	ggaaguucccaggaguguguu	caggacccugggagccucuuuccuuccggggaaggaaguucccaggaguguguu	chr1:33265481-33265535	Dendritic	SRR1708919	2	2	0	0
JHU_ID_01807	JHU_ID_01807.5p	JHU_ID_01807.3p	ggaggcaaacuuugagcgugucu	gaagccucaguuucccucuccu	ggaggcaaacuuugagcgugucucaggagccuaaaacaugagaagccucaguuucccucuccu	chr1:33265641-33265704	Colon adenocarcinoma	SRR1917329	171	166	0	5		Ago_555
JHU_ID_01808	JHU_ID_01808.5p/.3p		caggccccugucccucccugagc	ucauggguggggcuggaggcuuuugcu	ucauggguggggcuggaggcuuuugcugugggacuuugagcaggccccugucccucccugagc	chr1:33267055-33267118	Embryonic kidney	SRR1240816	6	6	0	0		Ago_556
JHU_ID_01811	JHU_ID_01811.5p/.3p		uggcccugaagcucugucccuc	ggggcugagcugcagggccaug	ggggcugagcugcagggccaugccguccugcauucuggaguccugcauccugggggacagcauggcccugaagcucugucccuc	chr1:33296325-33296409	Lung	SRR1608276	8	8	0	0		Ago_557
JHU_ID_01812	JHU_ID_01812.5p		ccuggagggcuggcugcagc	gucaaaccccguacugggag	ccuggagggcuggcugcagcugggcuucucugguuccuagaagccuggucaaaccccguacugggag	chr1:33320149-33320216	Neuron Dopaminergic	SRR5127234	2	2	0	0						RP11-415J8.3
JHU_ID_01814	JHU_ID_01814.5p		cccugggccccguucuggcaa	gccgggacagggcccaggguc	cccugggccccguucuggcaaggcuugcucgccgggacagggcccaggguc	chr1:33373782-33373833	Valve Interstitial Cell	SRR948073	1	1	0	0		Ago_562
JHU_ID_01815	JHU_ID_01815.3p	JHU_ID_01815.5p	uaugacauuaagagcccuauu	uuagggcucuuaauguuauuc	uuagggcucuuaauguuauucauucuguaauguaugacauuaagagcccuauu	chr1:33482069-33482122	Colon adenocarcinoma	SRR1917336	80	70	0	10						ZSCAN20
JHU_ID_01816	JHU_ID_01816.3p		uucaugcccuuccucuag	ggagguggguagggaaag	ggagguggguagggaaagccauccagauuuauagauaguuuucaugcccuuccucuag	chr1:33527044-33527102	Plasma	SRR822438	16	16	0	0						CSMD2
JHU_ID_01817	JHU_ID_01817.3p		auggaaggaugacucuucugacc	ugggaggaguucucuaaggaggugaugu	ugggaggaguucucuaaggaggugaugucuagcuggacauggaaggaugacucuucugacc	chr1:33558065-33558126	Fibroblast Dermal (neonatal)	SRR5127225	23	23	0	0						CSMD2
JHU_ID_01818	JHU_ID_01818.3p		acacagugggccuggccaug	uggccuggccucacgcgugg	uggccuggccucacgcguggguccaucccggaaccacacagugggccuggccaug	chr1:3358080-3358135	Astrocytes	SRR5127214	3	3	0	0
JHU_ID_01819	JHU_ID_01819.3p	JHU_ID_01819.5p	uuuucccugguguccuugcccua	aaugcaagggccuggaggagcc	aaugcaagggccuggaggagccaaacuuaaaugguuuucccugguguccuugcccua	chr1:33622272-33622329	Brain, Prefrontal Cortex	ERR409900	23	19	0	4		Ago_565				CSMD2
JHU_ID_01820	JHU_ID_01820.3p		ggaaggaugggugaguggg	ggcucacugaauguuuccau	ggcucacugaauguuuccaugaauggauggauggauggaugaauggaaggaugggugaguggg	chr1:3371565-3371628	B Cell_memory	SRR060986	44	44	0	0
JHU_ID_01821	JHU_ID_01821.3p		uggccucucucuguccuugugg	aacuugggcagccggagggccacc	aacuugggcagccggagggccaccaagcuggggagugguggccucucucuguccuugugg	chr1:3378268-3378328	Neuron iPSC	SRR1777167	1	1	0	0
JHU_ID_01822	JHU_ID_01822.3p		aaucccccccuccccgcc	ugcuugggguugggauugu	ugcuugggguugggauugugaauugaaucccccccuccccgcc	chr1:33789293-33789336	Plasma	SRR822443	7	7	0	0
JHU_ID_01823	JHU_ID_01823.3p		ucagagggcugagagaagcaca	agcuucucacaggaagcuggcc	agcuucucacaggaagcuggccaggucauuuccuacccuggucagagggcugagagaagcaca	chr1:33916563-33916626	Myoblast Skeletal Muscle	SRR1200834	1	1	0	0
JHU_ID_01824	JHU_ID_01824.3p		accugaaacguacuaggcacuc	gugccugguauguuucaggucc	gugccugguauguuucagguccuggacuaaaaguaaaauaagcuuuuaguccaggaccugaaacguacuaggcacuc	chr1:33940440-33940517	Fibroblast Dermal (neonatal)	SRR5127225	7	7	0	0
JHU_ID_01825	JHU_ID_01825.5p		ugccgccagacacucccg	cuugugcuggcggcaug	ugccgccagacacucccggaccgaagacacaggguuccuugugcuggcggcaug	chr1:3395588-3395642	Retina	ERR973615	2	2	0	0
JHU_ID_01826	JHU_ID_01826.3p		agagagcccugaacguggcccu	agccacgaacagggcugugc	agccacgaacagggcugugcguucaauuugguugcagagagcccugaacguggcccu	chr1:3421601-3421658	Lung Adenocarcinoma	SRR1013967	4	4	0	0
JHU_ID_01827	JHU_ID_01827.5p		ugggacuccagcuaggacu	uccugccugccugaguuugccauu	ugggacuccagcuaggacuucagaguuuauacaaagcccucacgaaaguguaggggccuggaguccugccugccugaguuugccauu	chr1:34546049-34546136	SkinDermis	SRR1259216	4	4	0	0
JHU_ID_01828	JHU_ID_01828.3p		gacugggcugcugcuggggac	ucugggaaggcugcccacccu	ucugggaaggcugcccacccucccugggaggacugggcugcugcuggggac	chr1:3467426-3467477	Biliosphere	ERR842904	1	1	0	0						ARHGEF16
JHU_ID_01829	JHU_ID_01829.3p		ugccagggcccuguagcaccagccu	gcuggcugggcagguguccugggcaca	gcuggcugggcagguguccugggcacacugugggccgugugggcugugccagggcccuguagcaccagccu	chr1:3475874-3475945	Hepatocellular carcinoma (HepG2)	ERR738403	1	1	0	0						ARHGEF16
JHU_ID_01830	JHU_ID_01830.5p/.3p		acugguggagccgguucuggu	cagcugcccuccaaagccagcuc	acugguggagccgguucugguucccccagcugcccuccaaagccagcuc	chr1:34782154-34782203	Skin	SRR2174533	7	7	0	0						GJB3
JHU_ID_01831	JHU_ID_01831.5p		aggcaggcugugcagggcu	uccuccaugguccuggcccac	aggcaggcugugcagggcuggaauguccccuccuccaugguccuggcccac	chr1:34788147-34788198	T cell leukemia	SRR1304307	8	8	0	0
JHU_ID_01832	JHU_ID_01832.3p		cucagggccaggcugaacug	gggcuagcugcccugaggg	gggcuagcugcccugagggauccggcugggcuggcuuccccucuaggccucucccucagggccaggcugaacug	chr1:34791328-34791402	Lung	SRR1608282	1	1	0	0
JHU_ID_01833	JHU_ID_01833.3p		accuggccaggcuggacgcugac	cagccugcagcccggcaugcucu	cagccugcagcccggcaugcucuggaccuggccaggcuggacgcugac	chr1:3479966-3480014	Lung	SRR1608272	1	1	0	0						ARHGEF16
JHU_ID_01834	JHU_ID_01834.3p		gcuccaggcuggugggacugc	agcugccagaacaagccu	agcugccagaacaagccugccagggagccuuuugacucuggucagcuccccagggcuccaggcuggugggacugc	chr1:34851566-34851641	Skin	SRR2174513	2	2	0	0
JHU_ID_01836	JHU_ID_01836.5p		ucccgcccccuccgccuugcaga	ugcacugugacugcggggguggggcu	ucccgcccccuccgccuugcagauugcagaaggggccaguuugggcccagcugcacccugcacugugacugcggggguggggcu	chr1:3492705-3492789	Skin	SRR2174541	1	1	0	0						MEGF6
JHU_ID_01837	JHU_ID_01837.5p		gugcgccucuuccaccaggacugc	cgccuggugaagggggcgccca	gugcgccucuuccaccaggacugcugcugggcacugagcugccgccuggugaagggggcgccca	chr1:34976498-34976562	Blood	SRR2201549	1	1	0	0						RP11-244H3.1
JHU_ID_01838	JHU_ID_01838.3p	JHU_ID_01838.5p	augaggggauggaggagcagc	ugcuccuuccuccacacaucc	ugcuccuuccuccacacauccacuccuaggaugaggggauggaggagcagc	chr1:34983118-34983169	Monocyte	SRR926589	9	8	0	1						ZMYM6NB
JHU_ID_01841	JHU_ID_01841.5p		gcgcugccugcuaggcug	gcagggcggggcagugccc	gcgcugccugcuaggcuggagggagcagggcggggcagugccc	chr1:3530944-3530987	Dendritic	SRR1708914	1	1	0	0						MEGF6
JHU_ID_01842	JHU_ID_01842.5p		ucgcggugacacaccuggcccu	agucaugugucucauugcuuca	ucgcggugacacaccuggcccugguucuccuucccgagucaugugucucauugcuuca	chr1:3535128-3535186	Lung Adenocarcinoma	SRR1013967	125	125	0	0						MEGF6
JHU_ID_01843	JHU_ID_01843.5p	JHU_ID_01843.3p	uguuggucugaguguugu	accacgcuugacuagcuuu	uguuggucugaguguuguggguuauuguuaagcugauuuaccauugucuccccccacaaccacgcuugacuagcuuu	chr1:35427816-35427893	Platelet	ERR747965	114	112	0	2
JHU_ID_01844	JHU_ID_01844.5p		ucccagccuggagaggagccugu	uggcuccucaggcugggguaagg	ucccagccuggagaggagccugugacuugcccuguuccuuggcuccucaggcugggguaagg	chr1:35435144-35435206	BladderEpithelium	DRR013038	1	1	0	0						KIAA0319L
JHU_ID_01845	JHU_ID_01845.5p		agaggaggaagggcgggcgc	gcccguccguccugccuccau	agaggaggaagggcgggcgcugggcacccguugaccgacuuuuccaagugcgaucagugcccguccguccugccuccau	chr1:35573314-35573393	Lung Adenocarcinoma	SRR1013979	3	3	0	0						RP4-728D4.2
JHU_ID_01846	JHU_ID_01846.5p		ugggcaggaaauggcagggcug	gcccuccauuuccugcccaca	ugggcaggaaauggcagggcugaggccgacccuaggaguauaagggagcccuccauuuccugcccaca	chr1:35577848-35577916	Testes	SRR333678	2	2	0	0		Ago_581				TFAP2E
JHU_ID_01847	JHU_ID_01847.5p		ucuaacacaguuuucuucuuugagc	gaaaagauauuacuccuguguguuggaga	ucuaacacaguuuucuucuuugagcagaucaugacaagauguuuaagaugagugaaaagauauuacuccuguguguuggaga	chr1:35636377-35636459	Testes	SRR333682	47	47	0	0						PSMB2
JHU_ID_01848	JHU_ID_01848.5p		uggcagucuggugccagggcug	ggcuggguccagucauuucugccagg	uggcagucuggugccagggcuggggugcggaaaccuccccaggcuggguccagucauuucugccagg	chr1:35708635-35708702	Neuron iPSC	SRR1777169	2	2	0	0
JHU_ID_01849	JHU_ID_01849.5p	JHU_ID_01849.3p	aauacagauauucagugguac	accacugaauaucuguagaucau	accacugaauaucuguagaucaucauuauauaucugaauacagauauucagugguac	chr1:35751021-35751078	Cervical cancer	SRR1304304	30	25	0	5
JHU_ID_01852	JHU_ID_01852.5p/.3p		gacgucggggcaggagcggccg	gccucugggccccgagccgugcc	gccucugggccccgagccgugccggagcgacgucggggcaggagcggccg	chr1:35930986-35931036	Lung	SRR1216779	3	3	0	0						AGO3
JHU_ID_01854	JHU_ID_01854.5p		cgcggcggcgucgggcggcg	ccggccgagccuggg	cgcggcggcgucgggcggcguccccggaggccuuuaggguaggcgaggggcggccggccgagccuggg	chr1:36083945-36084013	Uterus	SRR1556139	9	9	0	0
JHU_ID_01855	JHU_ID_01855.3p		gggagcggugggggcacucaggc	uccaagccccccacccacccca	uccaagccccccacccaccccagacagagcaacugcagcugagggagcggugggggcacucaggc	chr1:36109090-36109155	Myotube Skeletal Muscle	SRR1055963	1	1	0	0						COL8A2
JHU_ID_01857	JHU_ID_01857.5p/.3p		acugggggaacccugggcac	gccucagcggccccccagccc	acugggggaacccugggcaccagcuugcagccucagcggccccccagccc	chr1:36150589-36150639	Dendritic	SRR1708910	4	4	0	0						TRAPPC3
JHU_ID_01858	JHU_ID_01858.3p		gagcccagaccgacagaccg	gcugugagugugacucag	gcugugagugugacucagguuucugugggcagccaagggcagccggcagggaggagcccagaccgacagaccg	chr1:36150915-36150988	Lung	SRR1608275	2	2	0	0						TRAPPC3
JHU_ID_01859	JHU_ID_01859.3p		ugugucucuaaacauggcag	gccauguuuagagacauacg	gccauguuuagagacauacggcggugggcggggggugugucucuaaacauggcag	chr1:36153660-36153715	Kidney	SRR553575	1	1	0	0						TRAPPC3
JHU_ID_01860	JHU_ID_01860.5p		auccguccagcugccgcgca	cggggaggggaaaggagggaggg	auccguccagcugccgcgcaaagggccuguugcugcugcgggccggcggggaggggaaaggagggaggg	chr1:36156974-36157043	Dendritic	SRR1708909	1	1	0	0						MAP7D1
JHU_ID_01861	JHU_ID_01861.5p/.3p		ucugucccccuccuccccgaau	cugggaaggagggcaggcaggag	cugggaaggagggcaggcaggagaagcagauuuacuucugucccccuccuccccgaau	chr1:36157197-36157255	Brain, Prefrontal Cortex	ERR409900	56	56	0	0		Ago_584				MAP7D1
JHU_ID_01862	JHU_ID_01862.3p		cuucccagaggacccugggcucu	gguccggggccuuccuccugguucaac	gguccggggccuuccuccugguucaacugcuuaggcuccaaccuggcaggcuucccagaggacccugggcucu	chr1:36160812-36160885	Cervical cancer	SRR1304304	6	6	0	0						MAP7D1
JHU_ID_01864	JHU_ID_01864.3p		uuggggcagaaccagacgcc	cgcuugggcagaaccaagg	cgcuugggcagaaccaaggguggcagauuauccuagggacucuuggggcagaaccagacgcc	chr1:36307432-36307494	Plasma Cell	SRR060984	2	2	0	0						SH3D21
JHU_ID_01865	JHU_ID_01865.5p	JHU_ID_01865.3p	ugguacugagcuuggggccugu	agggcccaggcucaguagccaca	ugguacugagcuuggggccuguggugaggugagggagcagagcccaaggcccuggcuucacaucacagggcccaggcucaguagccaca	chr1:36316625-36316714	Colon adenocarcinoma	SRR1917329	38	37	0	1		Ago_586				SH3D21
JHU_ID_01866	JHU_ID_01866.5p		gcugggggcaggaguaacag	uuuggucacuucaccucuucaucga	gcugggggcaggaguaacagagggagagacugagucacugagaaugcagcuuucuuucauuuggucacuucaccucuucaucga	chr1:36321996-36322080	Thyroid	SRR1291269	2	2	0	0
JHU_ID_01869	JHU_ID_01869.3p		uaggcacucacugcgggcuagug	cgcaggcccgcagugagggcugaau	cgcaggcccgcagugagggcugaaugaggugcccucgggguaggcacucacugcgggcuagug	chr1:36342592-36342655	Placenta	SRR567635	4	4	0	0						STK40
JHU_ID_01870	JHU_ID_01870.3p		uccucucuugcagcacca	cagccugugaguggggcug	cagccugugaguggggcugugccuguuugcagggcucaggcugugggcuagcccuggaugggacuccucucuugcagcacca	chr1:36346802-36346884	Plasma	SRR822446	22	22	0	0						STK40
JHU_ID_01871	JHU_ID_01871.5p		acggcggagugccagcugggc	ucuuuccuggccuccuccccuc	acggcggagugccagcugggcucucuugcucuuuccuggccuccuccccuc	chr1:36367236-36367287	Brain, Prefrontal Cortex	ERR409888	2	2	0	0						STK40
JHU_ID_01872	JHU_ID_01872.5p		acugggcuuuucugugacc	cugcaaagaaagccuagaag	acugggcuuuucugugaccuccuuuggaggcugcaaagaaagccuagaag	chr1:36374245-36374295	CD4+ T Cell	SRR1532973	2	2	0	0						STK40
JHU_ID_01873	JHU_ID_01873.5p		uggccucuggcagauaucaguc	cugaaucugcugagccagc	uggccucuggcagauaucaguccuuccugagaagaaggacugaaucugcugagccagc	chr1:36380462-36380520	Macrophage	SRR1532975	2	2	0	0						STK40
JHU_ID_01874	JHU_ID_01874.5p		agggaugcuuggucacauacaugu	cuguaacuacaaucccuuu	agggaugcuuggucacauacauguugauuaagaaaaaaaauauauagacccucuucuucucucugaucagccuguaacuacaaucccuuu	chr1:36418381-36418471	Brain, Prefrontal Cortex	ERR409883	158	157	1	0		Ago_592				OSCP1
JHU_ID_01875	JHU_ID_01875.3p		acugcaccauuuccuguga	gcaggagaggugcaguau	gcaggagaggugcaguauuucacuggguccuuuggaaagggcagggaagcuccugcucgcccguacugcaccauuuccuguga	chr1:3664442-3664525	B cell lymphoblastoid	SRR1304313	2	2	0	0						RP5-1092A11.5
JHU_ID_01876	JHU_ID_01876.5p		gccagcggacagccacucugag	cagcaguggcugccucuggaag	gccagcggacagccacucugaggaacagcaguggcugccucuggaag	chr1:3671788-3671835	Melanocyte	SRR5127207	1	1	0	0
JHU_ID_01877	JHU_ID_01877.5p		uaggauaggaucugggaccag	gccugagcugucccgug	uaggauaggaucugggaccagggccugcugccuuugccuggcacaguuccugccugagcugucccgug	chr1:3687038-3687106	Breast adenocarcinoma	SRR873383	3	3	0	0		Ago_125
JHU_ID_01878	JHU_ID_01878.3p		ccuccccuacauuguggcuuucc	augcugcuuaagggggcggg	augcugcuuaagggggcgggugguaccugccacagggcagaacccaccgccugaccuccccuacauuguggcuuucc	chr1:36922292-36922369	CD4+ T Cell	SRR1532971	2	2	0	0
JHU_ID_01879	JHU_ID_01879.3p		cugccaggggagcucugcugagc	ccaggggagcucugcugagcagac	ccaggggagcucugcugagcagacauggaaucgaaccucagugcugccaggggagcucugcugagc	chr1:36987222-36987288	Lung cancer	SRR1013983	41	41	0	0
JHU_ID_01880	JHU_ID_01880.5p		gcggccccauccuugggagcug	gcucccaaggauggggucccu	gcggccccauccuugggagcuguccuggccucagcucccaaggauggggucccu	chr1:3699987-3700041	Nasopharyngeal epithelial cell	SRR1564522	1	1	0	0
JHU_ID_01881	JHU_ID_01881.5p		ucugaggguggggaggguuc	gccccccaucucucacacaug	ucugaggguggggaggguuccuccaggacccaguugauggggacccggcggggccccccaucucucacacaug	chr1:37047570-37047643	Neuron iPSC	SRR1777167	1	1	0	0
JHU_ID_01883	JHU_ID_01883.5p		uccuggaggcuucugagc	ucugagcuguccaggaagc	uccuggaggcuucugagcagcugcucugagcuguccaggaagc	chr1:37189327-37189370	Epithelium Keratinocyte (Neonatal)	SRR5127208	1	1	0	0
JHU_ID_01884	JHU_ID_01884.3p		uggcuguggagugggugccagg	cggcacucacaccccugcuguc	cggcacucacaccccugcugucauggagcccaaaugacccgauggcuguggagugggugccagg	chr1:3721762-3721826	T cell leukemia	SRR1292463	261	261	0	0		Ago_128
JHU_ID_01885	JHU_ID_01885.5p/.3p		uggggcuuguccaagagggg	ucucuaggaucagugucccacc	uggggcuuguccaagaggggcaggugggccucucuaggaucagugucccacc	chr1:3738607-3738659	Platelet	SRR1592249	6	6	0	0						TP73-AS1
JHU_ID_01887	JHU_ID_01887.3p		ugcgcgccggacggggccc	gccccgcccccgcggccg	gccccgcccccgcggccgcugcgcgccggacggggccc	chr1:37474386-37474424	Smooth Muscle Cell Bladder	SRR5127215	1	1	0	0						LINC01137
JHU_ID_01888	JHU_ID_01888.5p		gggcagugagacguggggcugcugg	ccaagccccagucccccauccc	gggcagugagacguggggcugcugguccuaggagcucuuccaugacaccuaguguuaccugggagccccaagccccagucccccauccc	chr1:37479162-37479251	Bladder	SRR333672	3	3	0	0						ZC3H12A
JHU_ID_01889	JHU_ID_01889.5p		agggccgucaggcugggcuuugggc	ccauucccagcccugaggcccacc	agggccgucaggcugggcuuugggccauugagcagcccauucccagcccugaggcccacc	chr1:37483651-37483711	Epithelium Keratinocyte (Neonatal)	SRR5127208	2	2	0	0
JHU_ID_01890	JHU_ID_01890.5p	JHU_ID_01890.3p	uuguccaaagggauauauaugacu	uguguauucucucuuugaacagu	uuguccaaagggauauauaugacugcauguaugugcuguguauucucucuuugaacagu	chr1:37576555-37576614	Colon adenocarcinoma	SRR1917331	5	3	0	2						GNL2
JHU_ID_01891	JHU_ID_01891.3p		caggcugcugcagcgucgucu	gcacagguaguucccuucg	gcacagguaguucccuucgguggccagcacuccguccuccgcagggcuggccgcucuccaggcugcugcagcgucgucu	chr1:37580636-37580715	Skin	SRR1259236	3	3	0	0						GNL2
JHU_ID_01892	JHU_ID_01892.5p		uucccggaacucucuaggcuga	aaccuagagcuaaugaugcaagaggg	uucccggaacucucuaggcugaaaaugaucaaccuagagcuaaugaugcaagaggg	chr1:37710089-37710145	Retina	ERR973611	3	3	0	0
JHU_ID_01893	JHU_ID_01893.5p		agagccucccgcagucucgucggc	cggguccccgcggggcugggaggcucgug	agagccucccgcagucucgucggcgcugcagccggguccccgcggggcugggaggcucgug	chr1:3772233-3772294	T cell leukemia	SRR1304307	10	10	0	0
JHU_ID_01894	JHU_ID_01894.5p		aacugacuuuaacuuaaaugauuu	agggcuagaguuaaagcuugguuca	aacugacuuuaacuuaaaugauuucuuagcucacauaagagggcuagaguuaaagcuugguuca	chr1:37742637-37742701	Colon adenocarcinoma	SRR1917337	3	3	0	0						EPHA10
JHU_ID_01895	JHU_ID_01895.5p/.3p		gcccggcgggcgccugcga	gcugcugugccugcgcugcggccg	gcugcugugccugcgcugcggccgcgagggcccggcgggcgccugcga	chr1:37753063-37753111	Lung	SRR372624	20	20	0	0						EPHA10
JHU_ID_01896	JHU_ID_01896.5p		acagcccuugccauaguuaccug	ggaaggcugugggaagggcuuguuu	acagcccuugccauaguuaccuggccaggcgugacauccaggaaggcugugggaagggcuuguuu	chr1:3776708-3776773	Cervical cancer	SRR1304304	3	3	0	0
JHU_ID_01897	JHU_ID_01897.5p/.3p		ucugggaggguuggggagagg	uccagccccaguacccccagggu	uccagccccaguacccccagggucauggaccuaggcugagcugagcaguguccuuacagcucugggaggguuggggagagg	chr1:3778098-3778179	Breast adenocarcinoma	SRR873382	4	4	0	0
JHU_ID_01898	JHU_ID_01898.5p		uuccccaggccaggacucugc	ggaguucuggggcuggggaccc	uuccccaggccaggacucugcuggaguucuggggcuggggaccc	chr1:3778887-3778931	Lung	SRR1608281	1	1	0	0						LRRC47
JHU_ID_01899	JHU_ID_01899.5p		gccaggaugaagugggag	gccacuccaggcug	gccaggaugaagugggagugaacccagcugcuagcagagcugccacuccaggcug	chr1:37809191-37809246	SkinDermis	SRR1259216	9	9	0	0						C1orf122
JHU_ID_01900	JHU_ID_01900.3p		uccggaggaaggugggga	cccaccuuccccuaacg	cccaccuuccccuaacgucacuuccgcuuccucuuuccggaggaaggugggga	chr1:37859596-37859649	Skin	SRR1259230	17	17	0	0						MTF1
JHU_ID_01901	JHU_ID_01901.3p		uacaguggguuuguuuuu	aaaugaacccauugggc	aaaugaacccauugggcaguuacaucaguaaccaugugucacucuacaguggguuuguuuuu	chr1:3794316-3794378	Osteoblast	SRR5127233	43	43	0	0
JHU_ID_01902	JHU_ID_01902.3p		accggggaggccugauccu	ggaggggccuuugcagagggag	ggaggggccuuugcagagggagaugguaccggggaggccugauccu	chr1:37946422-37946468	Osteoblast	SRR5127233	2	2	0	0
JHU_ID_01903	JHU_ID_01903.3p		acgccgcgggaacaucugga	caggauccucucgcggccgca	caggauccucucgcggccgcacguuuuuugccaaaaaaggcaaggaugcagcugcacacgccgcgggaacaucugga	chr1:37996234-37996311	Lung	SRR1608275	2	2	0	0
JHU_ID_01906	JHU_ID_01906.5p		ugcccggcugacucugucc	acagggccucagccagggcaga	ugcccggcugacucuguccuuuccuuacgaugaucagcucacagggccucagccagggcaga	chr1:38062264-38062326	Brain, Prefrontal Cortex	ERR409893	2	2	0	0						RP5-884C9.2
JHU_ID_01907	JHU_ID_01907.5p		ugcccggcaccuccacca	ggaaugcugcagggcaca	ugcccggcaccuccaccacacaagggcugugcugguugcugugggaaugcugcagggcaca	chr1:38212235-38212296	Epithelium Renal	SRR5127235	1250	1250	0	0		Ago_604				LINC01343
JHU_ID_01909	JHU_ID_01909.5p		ugacacaggagcuggguccc	caaccaguuucgccuucagc	ugacacaggagcugggucccagggggcggaggucuugggcggugccaccgggcaccugccucccggcaaccaguuucgccuucagc	chr1:38859118-38859204	SkinEpidermis	SRR1259212	26	26	0	0						RP5-864K19.7
JHU_ID_01911	JHU_ID_01911.3p		cgggcugggggccgguuuuc	gggccuuaguggaggccguc	gggccuuaguggaggccgucggugggcccaggaggccaggguccggcgucgggcugggggccgguuuuc	chr1:3901197-3901266	Skin	SRR1259230	12	12	0	0						LINC01134
JHU_ID_01912	JHU_ID_01912.5p		agggacucuccgcgggcac	gcagagcgggugguuucucc	agggacucuccgcgggcacacagagguccgagccccucugggaggaagcucgcacccagagcagagcgggugguuucucc	chr1:39106056-39106136	Hepatocellular carcinoma (HepG2)	ERR738403	2	2	0	0						MACF1
JHU_ID_01914	JHU_ID_01914.3p		agcccggaggagccccca	ggaaagagguuccaggaggagg	ggaaagagguuccaggaggaggggggcugggugcaccuccccacccugugccucagcccggaggagccccca	chr1:39498222-39498294	Mesangial	SRR5127221	309	309	0	0						BMP8A
JHU_ID_01915	JHU_ID_01915.5p		gcgcccggggcgggcgggua	ucucuccgccccgggucgcug	gcgcccggggcgggcggguauaaauggagcgguggcucccucggccgccucucuccgccccgggucgcug	chr1:39576768-39576838	B Cell_naive	SRR060985	2	2	0	0
JHU_ID_01917	JHU_ID_01917.3p		caacccaccgcaccccccucagu	ugagaugggggcggggugggcggg	ugagaugggggcggggugggcggggcugucgcugcgccccaacccaccgcaccccccucagu	chr1:39684151-39684213	BrainPrefrontalCortex	ERR409900	13	13	0	0	TJU_CMC_MD2.ID00120.3p-miR	Ago_622				HPCAL4
JHU_ID_01918	JHU_ID_01918.3p		agcccggaagagccccca	ggaaagagguuccgggagga	ggaaagagguuccgggaggaggggggcugggugcaccuccccacccugugccucagcccggaagagccccca	chr1:39778836-39778908	Fibroblast Dermal (neonatal)	SRR5127225	247	247	0	0
JHU_ID_01919	JHU_ID_01919.5p		aagcaggugcucuuuuuuu	agacggagucuugcucug	aagcaggugcucuuuuuuuuuuuuuuuuuccccagacggagucuugcucug	chr1:39798926-39798977	Colon adenocarcinoma	SRR1917329	2808	2808	0	0
JHU_ID_01920	JHU_ID_01920.3p		uccgguaggguguagugg	agaaagcaacccucuucccuaau	agaaagcaacccucuucccuaauaaaaagauauuccgguaggguguagugg	chr1:39814170-39814221	Skin	SRR1259228	1968	1968	0	0
JHU_ID_01921	JHU_ID_01921.3p		agcagccacugcagaagcucugug	cagagcuucuccaguguuuguuug	cagagcuucuccaguguuuguuugcagguggacuccaagcagccacugcagaagcucugug	chr1:39867622-39867683	BrainFrontal	SRR448331	11	11	0	0						TRIT1
JHU_ID_01922	JHU_ID_01922.3p	JHU_ID_01922.5p	cacugcccccucugccucccagg	gcccaggcuggagugcaguggc	gcccaggcuggagugcaguggcgcaaucucugcucacugcccccucugccucccagg	chr1:39880720-39880777	Hepatocellular carcinoma (HepG2)	ERR738411	6	4	0	2						TRIT1
JHU_ID_01923	JHU_ID_01923.5p		acugugccgagggacccgggg	ccuccuucgcccggccg	acugugccgagggacccggggacaccuccuucgcccggccg	chr1:39901479-39901520	Skin	SRR2174513	10	10	0	0
JHU_ID_01924	JHU_ID_01924.3p		uuauguuguccugggcuugaac	ucgagaccagggcaacauaggg	ucgagaccagggcaacauagggaggaucucaaaaauaaaagaacaaaaaucuccuuauguuguccugggcuugaac	chr1:39939685-39939761	Placenta	SRR567635	5	5	0	0		Ago_625
JHU_ID_01925	JHU_ID_01925.3p		caaagcuggcagugcucacu	ugagcacgcaccuuacac	ugagcacgcaccuuacacuaucaaagcuggcagugcucacu	chr1:40034802-40034843	Lung squamous carcinoma	SRR1013976	2	2	0	0
JHU_ID_01926	JHU_ID_01926.5p	JHU_ID_01926.3p	ccacucugcugaaauccggcuu	ggcugcuacucgguucaggggag	ccacucugcugaaauccggcuucugaggcagccucgcccagggcugggugggcucaggcggcugcuacucgguucaggggag	chr1:40039806-40039888	Dendritic	SRR1708913	6	3	1	2
JHU_ID_01929	JHU_ID_01929.3p		auggcuguaauccuuucaac	ugaaaggauuacagccaucc	ugaaaggauuacagccauccaaauaacaggauggcuguaauccuuucaac	chr1:40185452-40185502	Dendritic	SRR1708919	4	4	0	0		Ago_629
JHU_ID_01930	JHU_ID_01930.3p	JHU_ID_01930.5p	ugggcuagugaacgcggcgaagu	ugacgcuggguuccggcc	ugacgcuggguuccggccuaggguucuggcuuuccuccugggcuagugaacgcggcgaagu	chr1:40257883-40257944	Lung	SRR372640	14	13	0	1						RP1-39G22.7
JHU_ID_01931	JHU_ID_01931.5p/.3p		uggggagaggaggaggcgcuguc	cugcgccucccccacuuucccgu	cugcgccucccccacuuucccgucggguuuucccgcaccauggggagaggaggaggcgcuguc	chr1:40316146-40316209	BrainPrefrontalCortex	ERR409893	2	2	0	0		Ago_630				COL9A2
JHU_ID_01932	JHU_ID_01932.5p		gcggguagggcagagacuggg	ugguuucgagcucgccugcgg	gcggguagggcagagacugggcccggucgggugcugggugugguuucgagcucgccugcgg	chr1:40316593-40316654	B cell lymphoblastoid	SRR1304313	2	2	0	0		Ago_631				COL9A2
JHU_ID_01933	JHU_ID_01933.5p		cggcuggcuagagcaugguuccca	ggagccgcuccgccagcgca	cggcuggcuagagcaugguucccagcguccucccggggagccgcuccgccagcgca	chr1:40449997-40450053	Lung cancer	SRR1013983	8	8	0	0
JHU_ID_01934	JHU_ID_01934.3p		cgcccccgagggccguccggaa	cccgcccucucccgggaagcagcgcg	cccgcccucucccgggaagcagcgcgcgcccucgaacccggaagcuggaagccgcccgagcgcgcccccgagggccguccggaa	chr1:40477161-40477245	Skin	SRR2174517	9	9	0	0
JHU_ID_01935	JHU_ID_01935.5p	JHU_ID_01935.3p	cccagacaguagagacugc	cacugcagcaugggcgac	cccagacaguagagacugcagugagccgugaucccgccacugcacugcagcaugggcgac	chr1:40530621-40530681	Cervical cancer	SRR1532965	9	6	1	2
JHU_ID_01936	JHU_ID_01936.5p		acaccuggagagggcuuggaagc	uuccaugcucucucagaugugc	acaccuggagagggcuuggaagcucugugccucuuccauauacucaggaaguguggagcuuccaugcucucucagaugugc	chr1:40587197-40587278	Brain, Prefrontal Cortex	SRR1759215	1	1	0	0
JHU_ID_01937	JHU_ID_01937.5p		agggcccugagaccugcug	gagaguuuggagggcccuuu	agggcccugagaccugcuguugucaggauucaggagagaguuuggagggcccuuu	chr1:40646773-40646828	Brain, Prefrontal Cortex	ERR409887	2	2	0	0						RIMS3
JHU_ID_01938	JHU_ID_01938.5p		gcgccuggacucccaguaucgugcg	cgcgagaauugggaaggggcgacg	gcgccuggacucccaguaucgugcggugcgcagaagcugugcuccuugaggucucgcgagaauugggaaggggcgacg	chr1:40691593-40691671	Embryonic kidney	SRR515902	1	1	0	0						NFYC
JHU_ID_01940	JHU_ID_01940.5p		uuugggaauucagaacugcaau	ugcaauuuagaauucccaaaua	uuugggaauucagaacugcaaugauaaacccaugguuuaaguauugcaauuuagaauucccaaaua	chr1:40752592-40752658	Colon adenocarcinoma	SRR1917324	5	5	0	0						NFYC
JHU_ID_01941	JHU_ID_01941.5p	JHU_ID_01941.3p	aaaagcuggguacuugccuacc	uagacaugcccucagugaccac	uagacaugcccucagugaccacagagcuuucaacaagcugugaaaagcuggguacuugccuacc	chr1:40757532-40757596	Neuron Dopaminergic	SRR5127234	14	11	0	3		Ago_637
JHU_ID_01942	JHU_ID_01942.5p		ucucugggucuuggccugc	augccuuuccuggagggg	ucucugggucuuggccugccccgaacucuuaucugggccucuuacccaugccuuuccuggagggg	chr1:4075874-4075939	H9 Differentiated Midbrain	SRR1988301	2	2	0	0
JHU_ID_01943	JHU_ID_01943.5p	JHU_ID_01943.3p	cugugaccugggccccaguucu	acucaggccccuggucccacagg	cugugaccugggccccaguucuggagacugaggaccagaacucaggccccuggucccacagg	chr1:40818103-40818165	Epithelium Retinal Pigment	SRR493015	7	6	0	1	TJU_CMC_MD2.ID00122.5p-miR	Ago_638
JHU_ID_01944	JHU_ID_01944.5p		guggggcaggcuuacugcugca	cagcagugggucuccaccagaggccuc	guggggcaggcuuacugcugcacagcugaugggggcagcagugggucuccaccagaggccuc	chr1:40820563-40820625	Red Blood Cell	SRR5127232	1	1	0	0
JHU_ID_01945	JHU_ID_01945.5p		agggccugagagacuuggcguca	ggcuugucucucaggcccugc	agggccugagagacuuggcgucagaccugggcuugucucucaggcccugc	chr1:40854044-40854094	Smooth Muscle Cell Prostate	SRR5127222	1	1	0	0
JHU_ID_01946	JHU_ID_01946.5p		acgcggagguuucggagcac	guugcgggccuuugugacc	acgcggagguuucggagcacuacagguugcgggccuuugugacc	chr1:40862321-40862365	Bladder	DRR013040	14	14	0	0						CITED4
JHU_ID_01947	JHU_ID_01947.3p		uuccuguaguuccucaggugccu	gggccugugggaugggggagc	gggccugugggaugggggagcugggaggacgcuuccuguaguuccucaggugccu	chr1:40877906-40877961	Colon adenocarcinoma	SRR1264358	1	1	0	0
JHU_ID_01948	JHU_ID_01948.5p		acugagggcugaugaccuuu	aggucaucugugcagcucuuaaaau	acugagggcugaugaccuuugaugaccaugauuggaacugaaugaucaucagaggucaucugugcagcucuuaaaau	chr1:41008227-41008304	Skin	SRR2174513	13	13	0	0
JHU_ID_01949	JHU_ID_01949.3p		ccgccccgccccccgccucagc	ggaggcgcgggggaggggccgggg	ggaggcgcgggggaggggccgggggagcccccgccccgccccccgccucagc	chr1:41242214-41242266	Platelet	SRR1592246	1	1	0	0
JHU_ID_01950	JHU_ID_01950.5p		uuccuguggauggugagcucug	caucuucccgucuccccugcaccuagc	uuccuguggauggugagcucuguaagggaaagggcucuaccuuacaucuucccgucuccccugcaccuagc	chr1:41278326-41278397	Brain, Cerebellum	SRR553573	2	2	0	0						RP11-399E6.1
JHU_ID_01952	JHU_ID_01952.3p	JHU_ID_01952.5p	cgggcuccggcaccggcucgggc	uggcgcuggagccggagc	uggcgcuggagccggagcggcggcggcggcagcauucaccgggcggcggcggcgcgggcuccggcaccggcucgggc	chr1:41361472-41361549	Embryonic kidney	SRR1240817	13	12	0	1		Ago_646
JHU_ID_01953	JHU_ID_01953.3p	JHU_ID_01953.5p	ugcagcgacagguugugccggaug	gccggugcccucguucugc	gccggugcccucguucugcacgcggaugaaacgggugugcagcgacagguugugccggaug	chr1:41381620-41381681	Lung Adenocarcinoma	SRR1013979	227	225	0	2
JHU_ID_01955	JHU_ID_01955.3p		ccaggaccuguucugggggacu	gccccuagacucaggcccugagg	gccccuagacucaggcccugaggucgauccccaggaccuguucugggggacu	chr1:41493038-41493090	Lung Adenocarcinoma	SRR1013967	2	2	0	0
JHU_ID_01956	JHU_ID_01956.5p		uccgcaguggaucaccagggug	cucucgugguccucucugguuc	uccgcaguggaucaccagggugacucaguuccucccacucucgugguccucucugguuc	chr1:41525034-41525093	Skin	SRR2174542	2	2	0	0						HIVEP3
JHU_ID_01957	JHU_ID_01957.3p		cgccucucccguccgcucggccu	gccgagcacggggaccccgcc	gccgagcacggggaccccgccgccggcccggggcgccucucccguccgcucggccu	chr1:41662471-41662527	Colon adenocarcinoma	SRR1917330	4	4	0	0		Ago_650
JHU_ID_01958	JHU_ID_01958.5p	JHU_ID_01958.3p	caaacccacugaccagcugcca	ugcagcuggacaugggucugc	ugcagcuggacaugggucugcacacucacguacacgauugcaaacccacugaccagcugcca	chr1:41663750-41663812	Colon	SRR649562	10	8	0	2		Ago_651
JHU_ID_01959	JHU_ID_01959.3p		cagcagcaccuuguaggcuggu	uggucuacauggugccagcagagcc	uggucuacauggugccagcagagccacagcugggcagcagcaccuuguaggcuggu	chr1:41679589-41679645	Epithelium Renal Cortex	SRR5127204	3	3	0	0
JHU_ID_01961	JHU_ID_01961.3p		gcugguuuauucuggggaugc	guucugaggcugaguugguug	guucugaggcugaguugguugugcugguuuauucuggggaugc	chr1:41780460-41780503	T cell leukemia	SRR1292458	5	5	0	0
JHU_ID_01962	JHU_ID_01962.5p/.3p		ugugugugucauauauauguau	acauauauauauacacauaug	acauauauauauacacauauguguguauauauauacacaugugugugucauauauauguau	chr1:42005368-42005429	Colon adenocarcinoma	SRR1917330	54	54	0	0
JHU_ID_01963	JHU_ID_01963.5p		auugaugaugguaucugagc	ugaugcugcugucucu	auugaugaugguaucugagcuuggcagagggguucugugagauugggacccagaccuugcuggcugaugcugcugucucu	chr1:42307247-42307327	Lung Adenocarcinoma	SRR1013980	351	351	0	0						FOXJ3
JHU_ID_01965	JHU_ID_01965.5p		gccggcggcuaggaaggcc	uugcaccgcgccgcccgcug	gccggcggcuaggaaggccucggccgagguugcaccgcgccgcccgcug	chr1:42456747-42456796	Monocytic leukemia	DRR000555	2	2	0	0						PPCS
JHU_ID_01966	JHU_ID_01966.5p		gcugggggcaguggccuggacg	ggcagcccacucugcccccagcag	gcugggggcaguggccuggacggcuucaccacugacugccuggcagcccacucugcccccagcag	chr1:4267130-4267195	Colon adenocarcinoma	SRR1917331	2	2	0	0
JHU_ID_01967	JHU_ID_01967.5p		ucuggcucucugucucugagc	ucucugggaggccagggu	ucuggcucucugucucugagccugucuucucaucugugauggagaggaguaauagcucucugggaggccagggu	chr1:4267756-4267830	Colon adenocarcinoma	SRR1917323	2	2	0	0
JHU_ID_01968	JHU_ID_01968.5p		acuggaggcucucagacuc	gucuccuuucagcgc	acuggaggcucucagacuccagagcucggaagaagagccugggugucuccuuucagcgc	chr1:42757224-42757283	Smooth Muscle Cell, Coronary	SRR5127211	4	4	0	0						P3H1
JHU_ID_01969	JHU_ID_01969.3p		agagcugcucccuggcaggagac	cuccuggcuggggagcucucc	cuccuggcuggggagcucuccucggagccggggagagcugcucccuggcaggagac	chr1:42766337-42766393	Monocytic leukemia	DRR000555	3	3	0	0						P3H1
JHU_ID_01970	JHU_ID_01970.3p	JHU_ID_01970.5p	gagcgagacuccgucucaaaaca	gcacugagucgagaucgugcc	gcacugagucgagaucgugccacugcacuccagccugggugacagagcgagacuccgucucaaaaca	chr1:42811078-42811145	Skin	SRR2174533	2	1	0	1						CCDC23
JHU_ID_01973	JHU_ID_01973.3p		gggccugauggcaggagaugggc	gcggaaccugucugucaagcccug	gcggaaccugucugucaagcccugcuuccuccccagcaagggguuggggggagggccugauggcaggagaugggc	chr1:42931916-42931991	Endothelial Aortic	SRR5139121	1	1	0	0						SLC2A1
JHU_ID_01974	JHU_ID_01974.3p		uuugcugggcauggagac	agucaugcucagcugca	agucaugcucagcugcaggggaggugacaggacuuuuccaaguuugcugggcauggagac	chr1:42941870-42941930	Islet Beta Cell	SRR871671	4	4	0	0						SLC2A1
JHU_ID_01975	JHU_ID_01975.3p		uugccugacucuuggcacc	ggccuggacuggcaagu	ggccuggacuggcaaguuucuguguucagauaucuugccugacucuuggcacc	chr1:42943382-42943435	T cell leukemia	SRR1532969	2	2	0	0						SLC2A1
JHU_ID_01977	JHU_ID_01977.5p		gggagcagcucugggucu	ucccagggcagguugacu	gggagcagcucugggucuccucccagggcagguugacu	chr1:4294981-4295019	B Cell_memory	SRR060986	14	14	0	0
JHU_ID_01979	JHU_ID_01979.5p	JHU_ID_01979.3p	ucaugagaguugugugagaaccg	uguuccaugccucucuccuggc	ucaugagaguugugugagaaccgugaggaagaaucuguuccaugccucucuccuggc	chr1:43356279-43356336	Lung Adenocarcinoma	SRR1013979	1257	1219	0	38	TJU_CMC_MD2.ID00124.5p-miR	Ago_664				RP1-92O14.3
JHU_ID_01980	JHU_ID_01980.5p	JHU_ID_01980.3p	augggggugugcagugggaucu	cgcccucuguaccuccccagag	augggggugugcagugggaucugucugacauccgcccucuguaccuccccagag	chr1:43365621-43365675	Neuron iPSC	SRR1777168	4	3	0	1	TJU_CMC_MD2.ID00125.3p-miR	Ago_665
JHU_ID_01982	JHU_ID_01982.3p		guugggcguacuagcggcugg	agccgccucggccgccgcaaugc	agccgccucggccgccgcaaugcaggugagaguugcguugggcguacuagcggcugg	chr1:43389726-43389783	BrainPrefrontalCortex	ERR409879	2	2	0	0		Ago_668
JHU_ID_01983	JHU_ID_01983.3p		uaauuucuguuuuucucuuaca	gaggaggggaacagggguugga	gaggaggggaacagggguuggacauucccuuauagauugcucuaauuucuguuuuucucuuaca	chr1:43426991-43427055	Lung cancer	SRR1013983	151	151	0	0						SZT2
JHU_ID_01985	JHU_ID_01985.5p		ccugggaggaggcaugucc	acaugcugcucuuucccaggcu	ccugggaggaggcauguccaaagacaugcugcucuuucccaggcu	chr1:43437553-43437598	Brain, Prefrontal Cortex	ERR409879	2	2	0	0						SZT2
JHU_ID_01986	JHU_ID_01986.3p		cgagcucaggagaguccuag	ggggcaagcugagucugggg	ggggcaagcugagucugggguccauaggcccuucacugucugcaaggucugugggcaucagggauucgagcucaggagaguccuag	chr1:43449562-43449648	Skin	SRR1259226	15	15	0	0
JHU_ID_01987	JHU_ID_01987.3p		guaaguggaaggggguacuucgc	gaagacccaaccuccaauuacaa	gaagacccaaccuccaauuacaaaugguaaguggaaggggguacuucgc	chr1:43451774-43451823	Colon adenocarcinoma	SRR1917330	3	3	0	0						HYI
JHU_ID_01988	JHU_ID_01988.5p		gcauugcucaggcuggagug	cucaaccuccugggcuugagu	gcauugcucaggcuggagugcaguggugcaaucucagcucacugcagccucaaccuccugggcuugagu	chr1:43478470-43478539	CD3+ T Cell Splenic	SRR5127200	2	2	0	0
JHU_ID_01989	JHU_ID_01989.3p		ugcggucccgggcugcgccgggc	ccggcgcgcccgggucucgcucg	ccggcgcgcccgggucucgcucgcggccccggcgcacgugcggucccgggcugcgccgggc	chr1:43531596-43531657	Cervical cancer	SRR1304304	9	9	0	0						PTPRF
JHU_ID_01992	JHU_ID_01992.3p		agucacggucagggcugcagac	cugcagccuugaccuugagcuuucucc	cugcagccuugaccuugagcuuucucccucacuuaguccugacccugggagucacggucagggcugcagac	chr1:43568916-43568987	T cell leukemia	SRR1304307	12	12	0	0						PTPRF
JHU_ID_01993	JHU_ID_01993.5p	JHU_ID_01993.3p	cucaggacugggucauucuguu	cgguaacucgagucugggcuc	cgguaacucgagucugggcucccggaggacacugaagauggaggccugcuccguagcccucucaggacugggucauucuguu	chr1:43600408-43600490	Colon adenocarcinoma	SRR1917329	1139	1111	0	28	TJU_CMC_MD2.ID00126.5p-miR	Ago_686				PTPRF
JHU_ID_01994	JHU_ID_01994.5p		auuccugcccugcccacccagg	cgugugggcgggagcaugcugac	auuccugcccugcccacccaggugguucuacauuguuguggugcccauugaccgugugggcgggagcaugcugac	chr1:43605508-43605583	Islet Alpha Cell	SRR1028924	23	23	0	0		Ago_688				PTPRF
JHU_ID_01995	JHU_ID_01995.3p		gugagccucuagcuggaucgcgaag	acgcuguaccacuagggaccgcgg	acgcuguaccacuagggaccgcggccagugagccucuagcuggaucgcgaag	chr1:43649942-43649994	Placenta	SRR822457	1	1	0	0
JHU_ID_01996	JHU_ID_01996.3p		uuggcugguucagggaggugaaugc	augagcccucuuggagcagcuuccu	augagcccucuuggagcagcuuccuuuuggcugguucagggaggugaaugc	chr1:43659839-43659890	Brain, Frontal Cortex	SRR553572	2	2	0	0						KDM4A
JHU_ID_01997	JHU_ID_01997.3p		uccgugggcccugguggguaagg	gagcgcacccauuccgcucacugagg	gagcgcacccauuccgcucacugaggccgaaagcuucggaccuccgugggcccugguggguaagg	chr1:43707048-43707113	Platelet	SRR1592246	1	1	0	0						KDM4A-AS1
JHU_ID_01998	JHU_ID_01998.5p		cgggcugggggcccaguaccu	gugggggccgccgagccuggg	cgggcugggggcccaguaccuggaugaccucuccugggugggggccgccgagccuggg	chr1:43707862-43707920	Fibroblast Dermal (neonatal)	SRR5127225	1	1	0	0						ST3GAL3
JHU_ID_01999	JHU_ID_01999.3p		uugaguucgagaccagccuag	aggcuguucuugaacuccugg	aggcuguucuugaacuccugggcucaagaaaucuucccaccuugaguucgagaccagccuag	chr1:43709590-43709652	Red Blood Cell	SRR1664894	10	10	0	0						RP11-184I16.4
JHU_ID_02001	JHU_ID_02001.3p		uacccuggcuaugcuucugaacc	auuggaagcuguggucagggaugag	auuggaagcuguggucagggaugagagugcuggggauguguguggaccagcuguacccuggcuaugcuucugaacc	chr1:43932458-43932534	Cervical cancer	SRR1532966	2	2	0	0
JHU_ID_02002	JHU_ID_02002.3p		gggcuggaguugaagggu	ccagcagcuucuuguugcccaa	ccagcagcuucuuguugcccaagaaguucacguguagggcuggaguugaagggu	chr1:43964616-43964670	T cell leukemia	SRR1292461	2	2	0	0						IPO13
JHU_ID_02003	JHU_ID_02003.5p		ccagcucugcucaccgaaggau	ccuucuguucagggcugagg	ccagcucugcucaccgaaggaucugcuggcugaagguauccuucuguucagggcugagg	chr1:43967451-43967510	Mesangial	SRR5127221	1	1	0	0						IPO13
JHU_ID_02004	JHU_ID_02004.5p/.3p		ucuguccguccccauccucagg	gggggagggggggugcagacu	gggggagggggggugcagacugggugggguucuuugcccuuccuggagccuguuccagucuguccguccccauccucagg	chr1:43985438-43985518	Colon adenocarcinoma	SRR1917329	554	554	0	0	TJU_CMC_MD2.ID00128.3p-miR	Ago_702				B4GALT2
JHU_ID_02005	JHU_ID_02005.5p/.3p		ucuccuugggguaacuccagcc	cuggaguuaccuuuaggggagc	cuggaguuaccuuuaggggagccuagaguccucuccuugggguaacuccagcc	chr1:43999265-43999318	Colon adenocarcinoma	SRR1917323	88	88	0	0	TJU_CMC_MD2.ID00130.3p-miR
JHU_ID_02006	JHU_ID_02006.5p		cuugggugggauuugaugg	cucaacaucccugaaccauuua	cuugggugggauuugaugguuuaaacaagcgauuucacaagcauaaguugcugagauccucaacaucccugaaccauuua	chr1:44010331-44010411	Tongue squamous carcinoma	SRR1810082	10	10	0	0
JHU_ID_02007	JHU_ID_02007.3p		cggcuuugggaagggacugc	ccucucuuuguccgcg	ccucucuuuguccgcgcucuggccgcggcuuugggaagggacugc	chr1:44030631-44030676	CD3+ T Cell Splenic	SRR5127200	9	9	0	0
JHU_ID_02008	JHU_ID_02008.5p/.3p		ccuggggcacuauggggg	uccaggccccuggcc	ccuggggcacuauggggggcugaggcuggaguuagcccuccaggccccuggcc	chr1:44031807-44031860	Skin	SRR1259236	8	8	0	0		Ago_705
JHU_ID_02009	JHU_ID_02009.5p		accugcugccuuagacucuguga	gcagggacugaggcagcauggcuca	accugcugccuuagacucugugacagugcacguggagccccagacaggccacccucuucugcagggacugaggcagcauggcuca	chr1:44256899-44256984	Retina	ERR973618	2	2	0	0
JHU_ID_02010	JHU_ID_02010.5p		auggccaucuggaucacagaga	ucugugucuccaguggcuaggc	auggccaucuggaucacagagaugaagucugguuccucucugugucuccaguggcuaggc	chr1:44283287-44283347	Islet Alpha Cell	SRR1028924	9	9	0	0
JHU_ID_02011	JHU_ID_02011.3p		agggaggagagagguugaacaca	ggagcaggaaguuuuccucccccu	ggagcaggaaguuuuccucccccuugagggaggagagagguugaacaca	chr1:44304902-44304951	Retina	ERR973611	2	2	0	0
JHU_ID_02013	JHU_ID_02013.3p		acagggcaggucugggcacc	ugacaggcucacccugcugugucc	ugacaggcucacccugcuguguccugguuuggccaccuuggacagggcaggucugggcacc	chr1:44532173-44532234	Plasma	SRR822444	2	2	0	0						RNF220
JHU_ID_02014	JHU_ID_02014.5p		agcaggcugugggcccuguguc	caugggccugcagccuuucuc	agcaggcugugggcccuguguccccagggcccuggaacaugggccugcagccuuucuc	chr1:44536496-44536554	Lung cancer	SRR1013983	6	6	0	0						RNF220
JHU_ID_02015	JHU_ID_02015.5p		ugacuggaagggcaggugcuguu	cagccacaagauuuuccagugucu	ugacuggaagggcaggugcuguuucccaaacaggaaaaaaaacagccacaagauuuuccagugucu	chr1:44560307-44560373	T cell leukemia	SRR1292458	38	38	0	0
JHU_ID_02016	JHU_ID_02016.3p		ccaggaaggaggggaccagaugg	aucucagugguccaagugagagauggug	aucucagugguccaagugagagauggugccaucugacuagggcagcggcaccaggaaggaggggaccagaugg	chr1:44562119-44562192	Skin	SRR2174517	2	2	0	0
JHU_ID_02017	JHU_ID_02017.3p		gauccugcucugcucuucacaga	uguggggagcagguggggauggc	uguggggagcagguggggauggccugggcccagcaugauccugcucugcucuucacaga	chr1:44635972-44636031	Neuron iPSC	SRR1777168	19	19	0	0		Ago_713				TMEM53
JHU_ID_02018	JHU_ID_02018.5p		cagggcugacgacuguccc	cacagggucaguuucaacgugcu	cagggcugacgacugucccaugaguuggacacauggguguccgauggcagccacacagggucaguuucaacgugcu	chr1:44637429-44637505	Hepatocellular carcinoma (HepG2)	ERR738417	4	4	0	0						TMEM53
JHU_ID_02020	JHU_ID_02020.5p		uagacuguagugagcaaucuuugcc	cuucaagggauuuuccugcuucagu	uagacuguagugagcaaucuuugccugccggcuucaagggauuuuccugcuucagu	chr1:44730856-44730912	Tongue squamous carcinoma	SRR1810082	3	3	0	0
JHU_ID_02021	JHU_ID_02021.5p	JHU_ID_02021.3p	uuuccguggagagaaaccguu	ugguuucucuucaaaucgua	ugguuucucuucaaaucguauaaaucuuucgccuuuuacuaaagauuuccguggagagaaaccguu	chr1:44731098-44731164	Brain, Prefrontal Cortex	ERR409888	9	6	0	3						RNU5D-1
JHU_ID_02022	JHU_ID_02022.5p		guggucccaccugacccc	guguugggggaucacug	guggucccaccugaccccaaccccacuuuacaaaucugaaauacuccuagcaaacuggcagugggauggguguugggggaucacug	chr1:44757340-44757426	Plasma	SRR822447	2	2	0	0						KIF2C
JHU_ID_02023	JHU_ID_02023.5p		uaaggaccaggaugcggccaagca	cugaggcggcaccugggucacauaa	uaaggaccaggaugcggccaagcaagacagaaguguggccugcugaggcggcaccugggucacauaa	chr1:44762453-44762520	Breast adenocarcinoma	SRR960732	26	26	0	0						RP11-269F19.2
JHU_ID_02024	JHU_ID_02024.5p	JHU_ID_02024.3p	agauaaagugugucugaggagaca	gucucagugaugaaaacu	gucucagugaugaaaacuuuguccaguucugcuacugacaguaagugaagauaaagugugucugaggagaca	chr1:44778389-44778461	Pancreas	ERR852097	13	12	0	1		Ago_718				SNORD38B
JHU_ID_02025	JHU_ID_02025.5p		accggcugucccaggacu	uccugucgcaguccagac	accggcugucccaggacucgcgguuccgcguuccugucgcaguccagac	chr1:44786319-44786368	Embryonic kidney	SRR515902	2	2	0	0						BEST4
JHU_ID_02027	JHU_ID_02027.5p		aggcuguggucagaaaggc	cuugagccagggcccau	aggcuguggucagaaaggcuuuguccuaccccaggacucuugagccagggcccau	chr1:44807635-44807690	Lung	SRR372640	2	2	0	0
JHU_ID_02028	JHU_ID_02028.3p		gccuccuagagccucuuag	aggaggcagaugaggcug	aggaggcagaugaggcuggagccuccuagagccucuuag	chr1:44809593-44809632	Lung	SRR372620	2	2	0	0						BTBD19
JHU_ID_02029	JHU_ID_02029.5p		acggagguuguagugauccg	cgccacugcccucuaguca	acggagguuguagugauccgagaucgcgccacugcccucuaguca	chr1:44819679-44819724	Dendritic	SRR1708923	3	3	0	0		Ago_719
JHU_ID_02030	JHU_ID_02030.5p/.3p		aggcugaggcucuugccgagc	ugggcagggccucaggcuca	ugggcagggccucaggcucagggcuugugugggcgaggcugaggcucuugccgagc	chr1:44826830-44826886	Hepatocellular carcinoma (HepG2)	ERR738413	5	5	0	0
JHU_ID_02031	JHU_ID_02031.5p	JHU_ID_02031.3p	agagguggugggaaguaugcagc	ugcccauacuuucaccccucucu	agagguggugggaaguaugcagcaagucagguuuauagagcugcccauacuuucaccccucucu	chr1:44884291-44884355	B Cell Centroblast	SRR060981	580	536	2	42	TJU_CMC_MD2.ID00134.3p-miR	Ago_722				EIF2B3
JHU_ID_02032	JHU_ID_02032.5p		uucccuccacuuagucucuacu	gagggacuggggggagggaaug	uucccuccacuuagucucuacucuuccaagcucgaagcaaccagagggacuggggggagggaaug	chr1:45012637-45012702	Blood	SRR837474	5	5	0	0		Ago_724				UROD
JHU_ID_02033	JHU_ID_02033.5p		gccugaacacugggaagg	uucuuggaguaggggccu	gccugaacacugggaaggcacuggcagggccccgguuuugaugguggauucuuggaguaggggccu	chr1:45304656-45304722	RPE/Choroid	ERR973610	2	2	0	0						LINC01144
JHU_ID_02034	JHU_ID_02034.5p		auggagggaaucggcagcu	cugcccucccucucaggu	auggagggaaucggcagcugaggccugaccccugccuggcugcccucccucucaggu	chr1:45331554-45331611	T cell leukemia	SRR1292458	28	28	0	0						MUTYH
JHU_ID_02035	JHU_ID_02035.3p		cugugggggacuucaaacugguugc	acaggaugaagucaugggacaggg	acaggaugaagucaugggacagggagaugaagaagcuguauucucuugcagaucccguuccucugugggggacuucaaacugguugc	chr1:45455292-45455379	Neuron Dopaminergic	SRR5127234	4	4	0	0						TESK2
JHU_ID_02036	JHU_ID_02036.5p/.3p		ccuguuggcuucgcuggucggauc	ucgcggcccgggagcucagcagagc	ucgcggcccgggagcucagcagagcuaccagcugcccuguuggcuucgcuggucggauc	chr1:45491101-45491160	T cell leukemia	SRR1532969	10	10	0	0		Ago_733				TESK2
JHU_ID_02037	JHU_ID_02037.5p	JHU_ID_02037.3p	uuacauucucucucaucugcag	ggcagggagggagaaggaaag	ggcagggagggagaaggaaagaaguuggggaacagcccccuuacauucucucucaucugcag	chr1:45496623-45496685	Breast adenocarcinoma	SRR873382	3	2	0	1		Ago_734				CCDC163P
JHU_ID_02038	JHU_ID_02038.3p		ccugggccccaagagcgaaacuc	gaaucccuugaaccugagaggu	gaaucccuugaaccugagagguggagguugcagugagccgagauaaugccauugcauuccagccugggccccaagagcgaaacuc	chr1:45519618-45519703	Islet Alpha Cell	SRR1028924	4	4	0	0						PRDX1
JHU_ID_02039	JHU_ID_02039.3p		gacugacuggaagggcgcgg	gcgcccaguggucuugccu	gcgcccaguggucuugccucuuaaaaguuggacugacuggaagggcgcgg	chr1:45519884-45519934	Adult skin fibroblast	SRR2960040	1	1	0	0						PRDX1
JHU_ID_02040	JHU_ID_02040.3p		uuggcuguuccggguccugagc	ucgggaagcuucuggaauggaccugua	ucgggaagcuucuggaauggaccuguauccagacucguggcuguagaagacagccucuauguauuuggcuguuccggguccugagc	chr1:45521408-45521494	Brain, Prefrontal Cortex	ERR409888	2	2	0	0						PRDX1
JHU_ID_02041	JHU_ID_02041.5p/.3p		ucugucccugagugagucuc	ggccgcgcggggucucuaa	ggccgcgcggggucucuaaucugccauuuucugucccugagugagucuc	chr1:45584028-45584077	Neuron iPSC	SRR1777169	24	24	0	0
JHU_ID_02042	JHU_ID_02042.5p		cuggccuguuuuaaaacua	gagucagagaggcugggc	cuggccuguuuuaaaacuaauauuaaagagucagagaggcugggc	chr1:45671497-45671542	Lung non-small cell cancer	SRR1013971	2	2	0	0						GPBP1L1
JHU_ID_02043	JHU_ID_02043.5p		acucccagcggguagcgcggccg	gccguguggcccgcuggggacugg	acucccagcggguagcgcggccgacgcagccgcgcagccuccggggccaggccguguggcccgcuggggacugg	chr1:45687090-45687164	Plasma	SRR822439	1	1	0	0
JHU_ID_02044	JHU_ID_02044.3p		acccugggcugggcgcgguggc	caccgcgccuggcccuagguugc	caccgcgccuggcccuagguugcuuuuuuuuaucuuuaaucacccugggcugggcgcgguggc	chr1:45708347-45708410	Breast adenocarcinoma	SRR960732	15	15	0	0						IPP
JHU_ID_02045	JHU_ID_02045.3p		cuucagcuggucugccacaugu	auguggugguagcucagcucuggcc	auguggugguagcucagcucuggccucccucuggcuucagcuggucugccacaugu	chr1:45802831-45802887	Dendritic	SRR1708918	4	4	0	0
JHU_ID_02047	JHU_ID_02047.5p		uccaaucacacuucguugccuga	aagcaaggaagaggauuggaag	uccaaucacacuucguugccugauucucuaugcuuacagugcaagcaaggaagaggauuggaag	chr1:4604260-4604324	Blood	SRR2061741	3	3	0	0	TJU_CMC_MD2.ID00033.5p-miR
JHU_ID_02048	JHU_ID_02048.5p	JHU_ID_02048.3p	acuggacuucuccggccggccc	accgaccggagaggagccc	acuggacuucuccggccggccccauucccgaggcugcggcagcuucgguuccgagaccgaccggagaggagccc	chr1:46132478-46132552	Lung Adenocarcinoma	SRR1013980	58	56	0	2		Ago_739
JHU_ID_02049	JHU_ID_02049.5p		acugcuggcaucguccucugggcc	ugccuggggacagacugcuggcagggc	acugcuggcaucguccucugggccaccccgucauagcugggcuuccccaguguggugccuggggacagacugcuggcagggc	chr1:4615100-4615182	Neuroblastoma	SRR1304311	7	7	0	0		Ago_137
JHU_ID_02050	JHU_ID_02050.3p		ugcacuccaguucuugggcu	ccugggaaguggagguugcagc	ccugggaaguggagguugcagccaagaucaugccacugcacuccaguucuugggcu	chr1:46172413-46172469	Breast ductal carcinoma	ERR372264	5	5	0	0
JHU_ID_02052	JHU_ID_02052.3p		augucucugucuccaucccacc	aggggugggggcugggccaaag	aggggugggggcugggccaaagggucgucagugaccccucccuacagcucucugacccaugucucugucuccaucccacc	chr1:46189575-46189655	Hepatocellular carcinoma (HepG2)	ERR738415	2	2	0	0		Ago_740				POMGNT1
JHU_ID_02053	JHU_ID_02053.5p/.3p		uagggcggcggcggcggcggcggc	cgccgccgccgcugccgcggggugag	cgccgccgccgcugccgcggggugagagggcgacgggcggugcuuagggcggcggcggcggcggcggc	chr1:46198472-46198540	Neuron Dopaminergic	SRR5127234	21	21	0	0						POMGNT1
JHU_ID_02054	JHU_ID_02054.3p		ugcaggauccuugcaggcacug	gcccugggucagggucuaguagg	gcccugggucagggucuaguaggccuaggcugcaggauccuugcaggcacug	chr1:46248440-46248492	Hepatocellular carcinoma (HepG2)	ERR738415	4	4	0	0						RAD54L
JHU_ID_02056	JHU_ID_02056.5p/.3p		uacgugagccagggucugcaagc	cugcagaccccagcucauguagc	cugcagaccccagcucauguagccuguuccugccagacuugcugcuacgugagccagggucugcaagc	chr1:46407052-46407120	Blood	SRR2061746	23	23	0	0						FAAH
JHU_ID_02057	JHU_ID_02057.3p	JHU_ID_02057.5p	ugccugaugagcccugcccgcu	ggcgggcuggucucauguccuggca	ggcgggcuggucucauguccuggcaucaucuccccugggguggaugccugaugagcccugcccgcu	chr1:46423281-46423347	CD3+ T Cell Splenic	SRR5127200	6	5	0	1
JHU_ID_02058	JHU_ID_02058.3p		cccuggcugggggugggggug	uccucaccugguccuagcagggag	uccucaccugguccuagcagggagcugguagggauccuucugggacccuggucccuggcugggggugggggug	chr1:46458825-46458898	Biliosphere	ERR842904	1	1	0	0						LINC00505
JHU_ID_02059	JHU_ID_02059.3p		cagcaggcgcgcccgcuccacu	uggccugggugugcgugugag	uggccugggugugcgugugagugugcacgccugcaaaguguugcuguggcuguggcucagcaggcgcgcccgcuccacu	chr1:46466944-46467023	Brain, Prefrontal Cortex	SRR1759212	1	1	0	0						LINC00505
JHU_ID_02061	JHU_ID_02061.5p		gugcucgggcaagaaggaggcgaag	gcgucacguucacgcccgccagcag	gugcucgggcaagaaggaggcgaaggcgccugccagcgucacguucacgcccgccagcag	chr1:46533351-46533411	Neuron iPSC	SRR1777169	2	2	0	0
JHU_ID_02062	JHU_ID_02062.3p		gaaggggcucuguggucu	gcuggggagcugccuucca	gcuggggagcugccuuccauuaucgcagauccuaugccuggaaggggcucuguggucu	chr1:46555067-46555125	Neuron iPSC	SRR1777161	3	3	0	0
JHU_ID_02063	JHU_ID_02063.5p		cagccggccaggacacugcgcugcu	cgggcgcgccuggccggcccca	cagccggccaggacacugcgcugcuggcuccuagagcugcgggcgcgccuggccggcccca	chr1:4655714-4655775	Brain, Prefrontal Cortex	SRR1759217	1	1	0	0						AJAP1
JHU_ID_02064	JHU_ID_02064.5p		ccacgcaggcugggagagggag	gccucugguagaccuguauguag	ccacgcaggcugggagagggagggacagguguguuucaugugcccagucucugccucugguagaccuguauguag	chr1:46559076-46559151	Lung Adenocarcinoma	SRR1240815	2	2	0	0						MKNK1
JHU_ID_02067	JHU_ID_02067.5p		ucggugccggagcgcgggcgc	gcgcgcgggccgcgggccgagg	ucggugccggagcgcgggcgcggcgcacucggagcgggauggagcgggcgcgcgggccgcgggccgagg	chr1:46668360-46668429	T cell leukemia	SRR1292463	6	5	1	0						ATPAF1
JHU_ID_02069	JHU_ID_02069.5p		acuccgagugaacagggac	cccuguccacacuuggugacu	acuccgagugaacagggacauccucaacccuguccacacuuggugacu	chr1:46820623-46820671	H9 Differentiated Mesenchymal	SRR1988297	12	12	0	0
JHU_ID_02070	JHU_ID_02070.3p		uggagaugugagaaccuccaga	ugaaggcucauacuucuccacc	ugaaggcucauacuucuccacccaguuuuuaaaauguuugguggagaugugagaaccuccaga	chr1:47014753-47014816	Skin	SRR1259230	14	14	0	0
JHU_ID_02071	JHU_ID_02071.5p	JHU_ID_02071.3p	ugacuucccucucugugcaccc	cuggacaggagaagggaagcccaag	ugacuucccucucugugcacccaggacagggcuggacaggagaagggaagcccaag	chr1:47179534-47179590	Platelet	SRR1592246	3	2	0	1						LINC00853
JHU_ID_02072	JHU_ID_02072.3p		ucugcucuggccucuacccacc	gggguaguaaagguggggguagagg	gggguaguaaagguggggguagaggugcuggggcuggggccagaaucacacacagucugcucuggccucuacccacc	chr1:47180172-47180249	Red Blood Cell	SRR1664895	17	17	0	0						LINC00853
JHU_ID_02073	JHU_ID_02073.5p	JHU_ID_02073.3p	ucuggagacggaacuccacagc	cuggaaguuccucuucaagu	ucuggagacggaacuccacagccuguuuucaaagccaacuccuggcuggaaguuccucuucaagu	chr1:47180390-47180455	Plasma	SRR822437	9	8	0	1
JHU_ID_02074	JHU_ID_02074.5p		ggcccuggcaggcugguggag	ccaccccccagggacaa	ggcccuggcaggcugguggagugaccugacucgaacccacucccaccccccagggacaa	chr1:47181803-47181862	Red Blood Cell	SRR5127232	2	2	0	0
JHU_ID_02075	JHU_ID_02075.5p/.3p		ucuggucuaaucaaggaagac	cucuccuucagugaguggaga	cucuccuucagugaguggagaagcugggcuggcugcuggccuggcuuugcccucuggucuaaucaaggaagac	chr1:47182003-47182076	Red Blood Cell	SRR5127232	195	195	0	0
JHU_ID_02076	JHU_ID_02076.3p		uggagaggacagucagcugagc	ucggcuguggcccuggggucuccugc	ucggcuguggcccuggggucuccugcucagcucagaagagccuucuggagaggacagucagcugagc	chr1:47183711-47183778	Kidney	ERR038422	2	2	0	0						PDZK1IP1
JHU_ID_02077	JHU_ID_02077.5p/.3p		agggaaagaggcucugggcugc	agcacugaggcucuucccucc	agggaaagaggcucugggcugccuagauacagcacugaggcucuucccucc	chr1:47187698-47187749	Red Blood Cell	SRR1664893	1	1	0	0						PDZK1IP1
JHU_ID_02079	JHU_ID_02079.5p/.3p		uggacugugcagggagguugggc	ccaucuucuucccuuggcgacc	uggacugugcagggagguugggccagcaccaucuucuucccuuggcgacc	chr1:47226653-47226703	Platelet	SRR1592249	45	45	0	0	TJU_CMC_MD2.ID00139.5p-miR					RP1-18D14.7
JHU_ID_02080	JHU_ID_02080.5p		agaggcaggagaaucccuuga	aagcgguucuccugccucagc	agaggcaggagaaucccuugaaccccaccucccggguucaagcgguucuccugccucagc	chr1:47240280-47240340	T cell leukemia	SRR1292461	138	138	0	0
JHU_ID_02081	JHU_ID_02081.3p		gccgccgggacucguagucugc	ggacuacaagucccggcacgccg	ggacuacaagucccggcacgccgcgcgccggcggcccucggccacugccacgcgggcggcgcgguggccgccgggacucguagucugc	chr1:47334214-47334302	Hepatocellular carcinoma (HepG2)	ERR738417	6	6	0	0						CMPK1
JHU_ID_02082	JHU_ID_02082.5p		uccccauccccgacccggg	cuaaagcuugcggggacggggcuc	uccccauccccgacccgggccgagccucagggcuggcuccgcccuaaagcuugcggggacggggcuc	chr1:47334681-47334748	Lung	SRR372618	2	2	0	0		Ago_749				CMPK1
JHU_ID_02083	JHU_ID_02083.3p		aaggcccaggggaagaag	ucauccucuuauagucauaa	ucauccucuuauagucauaagauaaaaaagaaaggcccaggggaagaag	chr1:47375887-47375936	Skin	SRR2174517	4	4	0	0						CMPK1
JHU_ID_02084	JHU_ID_02084.5p		cggcggcggcugccgcggc	ggcgugcgggugcgggugcg	cggcggcggcugccgcggcgaaagcgaaggcgugcgggugcgggugcg	chr1:47438997-47439045	Lung	SRR372642	86	86	0	0						FOXD2
JHU_ID_02085	JHU_ID_02085.5p		ggcggggcugugagaucugugg	acagccucaugcccagcccg	ggcggggcugugagaucugugguguggugcugaaggagcugcugccucacagccucaugcccagcccg	chr1:47521446-47521514	CD4+ T Cell	SRR1532971	2	2	0	0
JHU_ID_02086	JHU_ID_02086.5p/.3p		uccaggcuccugggcacggca	ccuuguccaggcuccugggca	ccuuguccaggcuccugggcacggcaucccuuguccaggcuccugggcacggca	chr1:47708507-47708561	Islet Beta Cell	SRR871671	6	6	0	0
JHU_ID_02087	JHU_ID_02087.5p/.3p		cccuccgccccucgccgc	ggagaugggggcgucagccu	ggagaugggggcgucagccuagguccccggagccggguuucucagcacacccuccgccccucgccgc	chr1:47708657-47708724	Lung Adenocarcinoma	SRR1304309	8	8	0	0
JHU_ID_02088	JHU_ID_02088.3p		caucugcugcugacuccugc	agggcgcuggagcagaugug	agggcgcuggagcagaugugagggaauacugagcucaguuccgcaucugcugcugacuccugc	chr1:47847570-47847633	Colon adenocarcinoma	SRR1917324	2	2	0	0
JHU_ID_02090	JHU_ID_02090.5p		ugcccuggagaugguaaugacu	uccuugccagcuccugggacgag	ugcccuggagaugguaaugacuagggagagugagaugcuuccuugccagcuccugggacgag	chr1:47912802-47912864	Colon adenocarcinoma	SRR1917329	3	3	0	0
JHU_ID_02093	JHU_ID_02093.3p	JHU_ID_02093.5p	ggacaggacugagccaagcaug	ugcuuagcucagccaugcccuu	ugcuuagcucagccaugcccuucuuuacaggaaggacaggacugagccaagcaug	chr1:48242948-48243003	Melanoma	SRR1913138	12	11	0	1		Ago_754
JHU_ID_02094	JHU_ID_02094.3p		aggccaguauaagaacugc	auucuuauacuggccaua	auucuuauacuggccauaccaggccaguauaagaacugc	chr1:48299186-48299225	Brain, Prefrontal Cortex	ERR409893	2	2	0	0						SPATA6
JHU_ID_02095	JHU_ID_02095.5p		aaaauaaucuauacagggacu	uccuuguauagauuauuuuuu	aaaauaaucuauacagggacucuuacaaaagauggguccuuguauagauuauuuuuu	chr1:48307424-48307481	Retina	ERR973608	35	35	0	0						SPATA6
JHU_ID_02096	JHU_ID_02096.3p		cuuggugcugugucucagcc	uuuugugggcuaggcccagggu	uuuugugggcuaggcccagggucccugugcugugugcagccuagggacuuggugcugugucucagcc	chr1:48409807-48409874	Lung	SRR1216774	1	1	0	0
JHU_ID_02097	JHU_ID_02097.3p		gaggcugacacugaggaggac	ccccucaguugcagccaugu	ccccucaguugcagccauguugaggcugacacugaggaggac	chr1:48514803-48514845	Testes	SRR333678	2	2	0	0
JHU_ID_02098	JHU_ID_02098.5p		cuggucugugaguucaucuguuac	aacaugcacagacagagggagcu	cuggucugugaguucaucuguuaccuaaguuaacaugcacagacagagggagcu	chr1:48743653-48743707	Neural Stem Cell	SRR1988281	2	2	0	0						BEND5
JHU_ID_02099	JHU_ID_02099.5p	JHU_ID_02099.3p	cuucuuggacacucacagugcau	cacugugaguguccaagaag	cuucuuggacacucacagugcauauugaaaaccuagugugcacugugaguguccaagaag	chr1:48984506-48984566	Lung Adenocarcinoma	SRR1013979	5	4	0	1
JHU_ID_02100	JHU_ID_02100.5p		aauaagccagacaucagaaguu	cucugaugucuggcuuuucau	aauaagccagacaucagaaguuauauguaguauagcucugaugucuggcuuuucau	chr1:49054049-49054105	Lung	SRR372632	2	2	0	0						RP11-141A19.1
JHU_ID_02101	JHU_ID_02101.5p		uuggagaggcugcuggagcug	gcugcagccuccccagcc	uuggagaggcugcuggagcugaggcuggaccaccucuuucuaugggggccagacccuuuggcugcagccuccccagcc	chr1:50252084-50252162	Neuron iPSC	SRR1777168	2	2	0	0
JHU_ID_02102	JHU_ID_02102.5p		agacccagagcugcaagacug	gccuugacagucucugggugugu	agacccagagcugcaagacugcuacugcuguaguuguucuggccugggaacacagcccagcagccuugacagucucugggugugu	chr1:50589423-50589508	Retina	ERR973607	6	6	0	0
JHU_ID_02103	JHU_ID_02103.3p		ugauugcuggaguccaggagu	uggggcuugguggcaugcaug	uggggcuugguggcaugcauguguagucccagcuacuugggaggcugggguggauugauugcuggaguccaggagu	chr1:50788918-50788994	SkinDermis	SRR1259224	2	2	0	0
JHU_ID_02104	JHU_ID_02104.5p	JHU_ID_02104.3p	uuuagacuuucugagaagccc	ccuuugggaggcugaggc	uuuagacuuucugagaagcccuuaucugccuugcuagaaaaguauucuuggccuggcgugguggccuuugggaggcugaggc	chr1:50954193-50954275	Colon adenocarcinoma	SRR1917330	3	2	0	1
JHU_ID_02106	JHU_ID_02106.5p		cgggaggaucgccugaguccaggag	ccugggaaaucuggggagacuccaccu	cgggaggaucgccugaguccaggaguuaaaacccagccugggaaaucuggggagacuccaccu	chr1:51012854-51012917	Skin	SRR2174517	5	5	0	0
JHU_ID_02107	JHU_ID_02107.5p/.3p		aaaccuuuaaugccuuggccagg	uggacaaggcauuaaagguuugu	uggacaaggcauuaaagguuugucgcaaaaccuaggugacaaaccuuuaaugccuuggccagg	chr1:51851385-51851448	Hepatocellular carcinoma (HepG2)	ERR738404	4	4	0	0
JHU_ID_02108	JHU_ID_02108.5p		accagggccggccgccaccgcc	cggaggagguggguccugggaa	accagggccggccgccaccgccucuagaacgcggaggagguggguccugggaa	chr1:51878647-51878700	Stromal cell Prostate	SRR5127226	1	1	0	0
JHU_ID_02109	JHU_ID_02109.5p		agggcccgggcuaagaggcu	gcucggcccgggcccaugc	agggcccgggcuaagaggcugcgcucggcccgggcccaugc	chr1:52142692-52142733	Kidney	SRR553575	1	1	0	0						ZFYVE9
JHU_ID_02110	JHU_ID_02110.3p		cugacugggucauggcugc	aguaaaaggacuccaccagac	aguaaaaggacuccaccagacaagucacuucaugagggcaagugucugacugggucauggcugc	chr1:52191420-52191484	SkinEpidermis	SRR1259212	11	11	0	0
JHU_ID_02111	JHU_ID_02111.3p		ccccugggcuccagaaccagcca	gcaaagguucugaaggcccagagagcu	gcaaagguucugaaggcccagagagcugcccaccucacaagccccugggcuccagaaccagcca	chr1:52353485-52353549	Neuron Cortical	SRR5127209	2	2	0	0						CC2D1B
JHU_ID_02113	JHU_ID_02113.3p		gaugaggcagaaggaacac	guuccuucugcuucugucuu	guuccuucugcuucugucuucgaaagaugaggcagaaggaacac	chr1:52452046-52452090	Testes	SRR333682	12	12	0	0						ZCCHC11
JHU_ID_02115	JHU_ID_02115.5p		cgcugggcugaggcuggg	uagcaccaggcgaggguu	cgcugggcugaggcugggguugggguguagcaccaggcgaggguu	chr1:52634259-52634304	Skin	SRR2174517	3	3	0	0						FAM159A
JHU_ID_02116	JHU_ID_02116.5p	JHU_ID_02116.3p	cugucucugaggcucccggg	uuaagcuggacaggc	cugucucugaggcucccgggcugugcuuuaagcuggacaggc	chr1:52703493-52703535	Liver	SRR950886	7	6	0	1
JHU_ID_02117	JHU_ID_02117.5p		ucagacuacacuuugaguaccc	cuacucaaaguguggcuugagg	ucagacuacacuuugaguacccaagaacuaaauccuugcuacucaaaguguggcuugagg	chr1:52705415-52705475	Retina	ERR973612	3	3	0	0
JHU_ID_02118	JHU_ID_02118.5p		uccugaaacagcuuagauucua	gaaucuaagcuguuuggggaag	uccugaaacagcuuagauucuaucguccgucaugaaauggaaucuaauagaaucuaagcuguuuggggaag	chr1:52725435-52725506	Colon adenocarcinoma	SRR1917335	3	3	0	0
JHU_ID_02120	JHU_ID_02120.3p	JHU_ID_02120.5p	uaugucagauuauuacaggugc	accuauaauaaucugacauaua	accuauaauaaucugacauauaucugacacauacauauaugucagauuauuacaggugc	chr1:52962837-52962896	Immort. Mammary Epi	SRR433867	31	30	0	1
JHU_ID_02121	JHU_ID_02121.3p		aggccccugccuggguccu	ggccuggggacggggaccagc	ggccuggggacggggaccagccucugcucagagaggagaaggccccugccuggguccu	chr1:53062505-53062563	Placenta	SRR822452	1	1	0	0						PODN
JHU_ID_02122	JHU_ID_02122.3p		uggagaaaauggacaggugg	uccagucuuccguuuucucugug	uccagucuuccguuuucucugugcagcagggagguucuccgcagaccaaagguauggagaaaauggacaggugg	chr1:53083565-53083639	Bladder	SRR333668	2	2	0	0						RP11-334A14.5
JHU_ID_02123	JHU_ID_02123.5p		ccaggcagaggacaaacu	gccuuccucugccuguuu	ccaggcagaggacaaacucagccuuccucugccuguuu	chr1:53180128-53180166	Lung Adenocarcinoma	SRR1304309	3	3	0	0
JHU_ID_02125	JHU_ID_02125.3p		acacugacucugauccucuccc	auggggauugggguggugggg	auggggauuggggugguggggaaauuguccuagcaccacacugacucugauccucuccc	chr1:53275771-53275830	H9 Differentiated Mesenchymal	SRR1988298	2	2	0	0
JHU_ID_02126	JHU_ID_02126.3p		ccuggugugggacugcugcc	cagcaccuguuauugggaa	cagcaccuguuauugggaaauccaucuccuggugugggacugcugcc	chr1:53299438-53299485	Epithelium Retinal Pigment	SRR493013	5	5	0	0
JHU_ID_02127	JHU_ID_02127.5p/.3p		cugcugggaugacuucugagccu	gcuccugaggucuccccuggcca	cugcugggaugacuucugagccuaguccggucugguggauggcuccugaggucuccccuggcca	chr1:53300582-53300646	Lung non-small cell cancer	SRR1013972	8	8	0	0
JHU_ID_02128	JHU_ID_02128.5p		cggccccccgcccccgcgg	uugggggaggggugcagggg	cggccccccgcccccgcgggccucgguguugagggcucugcccucugggcagcggaucuugggggaggggugcagggg	chr1:53327553-53327631	Lung	SRR372624	1	1	0	0
JHU_ID_02129	JHU_ID_02129.3p		aggaggaggaggagcucggca	ccagggcuugagccauggcc	ccagggcuugagccauggccggguucacugugacccggaggaggaggaggagcucggca	chr1:53461130-53461189	Breast adenocarcinoma	SRR873383	2	2	0	0						DMRTB1
JHU_ID_02130	JHU_ID_02130.5p/.3p		agcccaggagguugauacugcagu	uguagucgcagcuacuugaggagcu	uguagucgcagcuacuugaggagcugagcugggaggauugcuugagcccaggagguugauacugcagu	chr1:53803139-53803207	Colon adenocarcinoma	SRR1917336	58	58	0	0						SNORA58
JHU_ID_02132	JHU_ID_02132.5p		aggcaauguagcaccccagaa	cugagguaccacaucgccucc	aggcaauguagcaccccagaagguaucugagguaccacaucgccucc	chr1:54189528-54189575	Retina	ERR973611	3	3	0	0						CYB5RL
JHU_ID_02134	JHU_ID_02134.3p	JHU_ID_02134.5p	cccuuuccuucugccccugcug	cgcagggcuguaggaaggacu	cgcagggcuguaggaaggacuuccuguugugauuucagcccuuuccuucugccccugcug	chr1:54242275-54242335	Red Blood Cell	SRR1664893	6	3	0	3
JHU_ID_02135	JHU_ID_02135.3p		agagccaccgacuuguuguuguu	ccaccagaagugcgguggcuccca	ccaccagaagugcgguggcucccagaccccggggugccaauucugagagccaccgacuuguuguuguu	chr1:54247691-54247759	Blood	SRR2201548	1	1	0	0
JHU_ID_02136	JHU_ID_02136.3p		uccccauggccagcagcucc	ggcacugggugggaca	ggcacugggugggacagguagaugccuguccccauggccagcagcucc	chr1:54251898-54251946	Lung	SRR372624	2	2	0	0
JHU_ID_02137	JHU_ID_02137.5p	JHU_ID_02137.3p	cagccuggugccugacgucug	agaugaccggcacuggggcu	cagccuggugccugacgucugcccagcggcagaugaccggcacuggggcu	chr1:54273469-54273519	Melanoma	SRR1913139	6	5	0	1
JHU_ID_02141	JHU_ID_02141.3p		aggccuggcucuggacggu	cacagagggaggccgau	cacagagggaggccgauuccuagcagucuggaaaggccuggcucuggacggu	chr1:54285613-54285665	Kidney	SRR553575	1	1	0	0						RP5-997D24.3
JHU_ID_02142	JHU_ID_02142.3p		cugcccuccugagucugccgccc	gcaggguaggacaggagggcugcu	gcaggguaggacaggagggcugcugcucaguguggucaggcugcccuccugagucugccgccc	chr1:54311651-54311714	Brain, Prefrontal Cortex	SRR1759213	1	1	0	0
JHU_ID_02143	JHU_ID_02143.3p		agcccuccaggcucugacc	ucagucccaugguggugacuuu	ucagucccaugguggugacuuuucagcacugucaggcugucugaugauggcuguugugcugcggagcccuccaggcucugacc	chr1:54375162-54375245	Epithelium Retinal Pigment	SRR493013	4	4	0	0
JHU_ID_02144	JHU_ID_02144.5p		gccgcgggcggacaaaaggag	ccugcccgcacccggugg	gccgcgggcggacaaaaggaggcuucggggcugcagaagccacgcgcccccugcccgcacccggugg	chr1:54405521-54405588	B Cell Centrocyte	SRR060982	1	1	0	0
JHU_ID_02145	JHU_ID_02145.3p		acugggcugcugguuuccugggg	cgcaggacccuggagcagccgcuggg	cgcaggacccuggagcagccgcuggggccuugaaggggcccacugggcugcugguuuccugggg	chr1:54571935-54571999	Brain, Prefrontal Cortex	ERR409883	4	4	0	0						ACOT11
JHU_ID_02147	JHU_ID_02147.5p		uggcugagagcuccugggaugg	uacccaggggcucuugggaaua	uggcugagagcuccugggauggcugucuuccugccuccccuuggugcccagccuccuacccaggggcucuugggaaua	chr1:54583178-54583256	Thyroid	SRR1291268	2	2	0	0						ACOT11
JHU_ID_02149	JHU_ID_02149.3p		cggggcuuaggagcgggcuug	ccccugcccucggccccgcc	ccccugcccucggccccgccuccgugagcgcggcuuugcaauuggcgaaaagggcaggaggcggggcuuaggagcgggcuug	chr1:54764526-54764608	CD3+ T Cell Splenic	SRR5127200	2	2	0	0
JHU_ID_02150	JHU_ID_02150.3p		agcagcuguggucagcccccu	ggggcauggcccagcagcugcucc	ggggcauggcccagcagcugcuccacaguucugcacagagcagcuguggucagcccccu	chr1:54799107-54799166	Skin	SRR2174509	2	2	0	0
JHU_ID_02153	JHU_ID_02153.5p/.3p		uuccgacuugucccucucucagc	caagggcuggggcugagcu	caagggcuggggcugagcuuuaaaaugguuccgacuugucccucucucagc	chr1:55063619-55063670	Cervical cancer	SRR1532965	137	137	0	0						PCSK9
JHU_ID_02155	JHU_ID_02155.5p/.3p		ggaggaggcggagggggaggagg	gccucccgugccgcuuccgggag	gccucccgugccgcuuccgggagccgaggcgcggccccgccgcccggggaggaggaggcggagggggaggagg	chr1:55215358-55215431	Myoblast Skeletal Muscle	SRR1055962	4	3	1	0
JHU_ID_02156	JHU_ID_02156.5p	JHU_ID_02156.3p	ucaggccaggcugggaggaugc	agccucccagucuggccugagu	ucaggccaggcugggaggaugcuguaaaugcagccucccagucuggccugagu	chr1:55318692-55318745	Platelet	SRR1592249	340	286	0	54	TJU_CMC_MD2.ID00144.3p-miR	Ago_814
JHU_ID_02157	JHU_ID_02157.3p		cgggacucagggggaugg	auuuagaggaguguuaggu	auuuagaggaguguuaggucuaaaggcacagccgggacucagggggaugg	chr1:5571436-5571486	SkinDermis	SRR1259224	5	5	0	0
JHU_ID_02158	JHU_ID_02158.3p		gucgauaggccgggagug	agcccagccuuaucuuucu	agcccagccuuaucuuucuuuauuaaaauacgucgauaggccgggagug	chr1:56300406-56300455	SkinDermis	SRR1259216	9	9	0	0
JHU_ID_02159	JHU_ID_02159.5p	JHU_ID_02159.3p	aggcacuaaagaaacacuggag	ccagugucucuuuagugccugg	ccagugucucuuuagugccuggcaccuacucugugcccaggcacuaaagaaacacuggag	chr1:56436508-56436568	Brain, Frontal Cortex	SRR553572	738	622	1	115	TJU_CMC_MD2.ID00146.3p-miR	Ago_817
JHU_ID_02161	JHU_ID_02161.5p	JHU_ID_02161.3p	uuucucuccugcagcucugacu	ucagagcugcaggagagaaacc	uuucucuccugcagcucugacuugcuuguaauuaaacgcaagucagagcugcaggagagaaacc	chr1:56462201-56462265	Hepatocellular carcinoma (HepG2)	ERR738403	44	37	0	7
JHU_ID_02162	JHU_ID_02162.5p		augggcugccagcuugugaccu	aucgcgggccauguagcucagugg	augggcugccagcuugugaccuuugagcuagaucgcgggccauguagcucagugg	chr1:56545967-56546022	H9 Differentiated Forebrain	SRR1988293	2	2	0	0						PPAP2B
JHU_ID_02164	JHU_ID_02164.3p		ggggacaaagggaaauuuuau	gaaauuuguuucccuuugucccuac	gaaauuuguuucccuuugucccuaccccauugugguuaggggugggggacaaagggaaauuuuau	chr1:56688187-56688252	Retina	ERR973618	2	2	0	0						PRKAA2
JHU_ID_02165	JHU_ID_02165.5p	JHU_ID_02165.3p	aacacugccaaacuguacacuu	aaguguacaguuuggcaguguu	aacacugccaaacuguacacuuagagaucuuaaccaucucuaaguguacaguuuggcaguguu	chr1:56795006-56795069	Brain, Prefrontal Cortex	ERR409900	125	83	0	42						C1orf168
JHU_ID_02166	JHU_ID_02166.3p		auuguugaaacucaagcau	gaaggaguguucagagagugg	gaaggaguguucagagaguggggucagaugauauagggcccuggaggccauuguugaaacucaagcau	chr1:56817154-56817222	Hepatocellular carcinoma	SRR2085171	4	4	0	0						C1orf168
JHU_ID_02167	JHU_ID_02167.3p		uaggcuggguguugaagug	cuugagccuggaagguggagg	cuugagccuggaagguggagguugcagugacucgagaucgcgccacugcacuuaggcuggguguugaagug	chr1:57784310-57784381	Plasma	SRR822446	17	17	0	0
JHU_ID_02169	JHU_ID_02169.5p		acacagugagcuaugauugca	cagucauagcucacuguaacu	acacagugagcuaugauugcaacauuguaauacuagagugcaguauugcagucauagcucacuguaacu	chr1:5835827-5835896	Biliosphere	ERR842904	1	1	0	0
JHU_ID_02170	JHU_ID_02170.5p		ccuucccauucccuuucccag	aagaaagggguggguggga	ccuucccauucccuuucccagauccuucaagaaagggguggguggga	chr1:58410403-58410450	Platelet	SRR1592248	2	2	0	0
JHU_ID_02171	JHU_ID_02171.5p	JHU_ID_02171.3p	aggcauuagauucucauaagga	cugagaaucugaugccac	aggcauuagauucucauaaggagugcacaaccuugcaugcauacuucacaaugcgcuccugagaaucugaugccac	chr1:58646878-58646954	Retina	ERR973615	12	9	0	3
JHU_ID_02172	JHU_ID_02172.5p/.3p		ccugagcaggucuccucugc	agaggagacuguggcuuca	agaggagacuguggcuucaacaugccaaccugagcaggucuccucugc	chr1:58656119-58656167	Skin	SRR2174542	14	14	0	0						MYSM1
JHU_ID_02173	JHU_ID_02173.5p	JHU_ID_02173.3p	ccugccccgccccgccgccacug	cgggcggcgggcgggacguggc	cgggcggcgggcgggacguggccucggucccggcccugccccgccccgccgccacug	chr1:58903660-58903717	Macrophage	SRR1532975	13	12	0	1		Ago_832
JHU_ID_02174	JHU_ID_02174.5p		agggccggacucuucggaaacu	uccucgugggauccggcccggg	agggccggacucuucggaaacugaaaucacgggccgcccggcccccaccaguccucgugggauccggcccggg	chr1:58903843-58903916	Fibroblast Dermal (neonatal)	SRR5127225	1	1	0	0
JHU_ID_02175	JHU_ID_02175.5p		acuggcucggcgcgcuccccga	ggcggggcgcguucauuucaucua	acuggcucggcgcgcuccccgaguggcgcucaggcggggcgcguucauuucaucua	chr1:58903967-58904023	Lung Adenocarcinoma	SRR1013979	10	10	0	0
JHU_ID_02176	JHU_ID_02176.3p		accccuuuguucuguucauu	ugaacagagcaaggacuggauc	ugaacagagcaaggacuggaucacacaccccuuuguucuguucauu	chr1:59056410-59056456	Skin	SRR2174529	5	5	0	0						RP11-145M4.2
JHU_ID_02177	JHU_ID_02177.5p		gguggcccugggaggaggcu	ccuuauaaagggccaaggc	gguggcccugggaggaggcugcuggcucuuuaggcagccccuggaugcuugggaggcagcuguggccuuauaaagggccaaggc	chr1:5909800-5909884	Plasma	SRR822447	1	1	0	0
JHU_ID_02178	JHU_ID_02178.3p	JHU_ID_02178.5p	uagagagaggucuggacuagac	ucuaguccagaccucucuucu	ucuaguccagaccucucuucuacuccauuguaaaugaaguagagagaggucuggacuagac	chr1:59108904-59108965	Epithelium Mammary	SRR5127224	4	3	0	1
JHU_ID_02179	JHU_ID_02179.3p		cugggcaguuggauccucugag	cagaggagcugcgcgggcc	cagaggagcugcgcgggccaaaugggcgcugcccaggagguaguuggacugggagcugugcccgccaggcugggcaguuggauccucugag	chr1:5910909-5911000	Red Blood Cell	SRR1664895	1	1	0	0
JHU_ID_02180	JHU_ID_02180.5p		acaggagaugagggagga	uuuccucagaguccagcuu	acaggagaugagggaggaagucaagugaccacuuuccucagaguccagcuu	chr1:59247796-59247847	Thyroid	SRR1291269	2	2	0	0
JHU_ID_02181	JHU_ID_02181.5p	JHU_ID_02181.3p	uguugugaccucugggcuccuggu	caggagguagaggcaccaacgcc	uguugugaccucugggcuccugguucuuccugcugcucagccaggagguagaggcaccaacgcc	chr1:5938337-5938401	Embryonic kidney	SRR1240817	5	4	0	1		Ago_145
JHU_ID_02182	JHU_ID_02182.3p		ggggagucugagacagcagggcuga	aucccugcaccucugggcuccuucuu	aucccugcaccucugggcuccuucuucacucaccaguuaggggagucugagacagcagggcuga	chr1:59396462-59396526	T cell leukemia	SRR1292461	2	2	0	0						FGGY
JHU_ID_02183	JHU_ID_02183.5p	JHU_ID_02183.3p	accggcugggcucaggcg	ccgccucgcuacacc	accggcugggcucaggcgucuucccuccuucuucgcgguagcacgccgccucgcuacacc	chr1:59814408-59814468	Colon adenocarcinoma	SRR1917329	63	58	4	1
JHU_ID_02184	JHU_ID_02184.3p	JHU_ID_02184.5p	aguuuuguugugucuuguagg	auaagaaacugccaaacug	auaagaaacugccaaacugauuuucuauuuuuaagucaguuuuguugugucuuguagg	chr1:59829461-59829519	Retina	ERR973611	3	2	0	1						HOOK1
JHU_ID_02185	JHU_ID_02185.5p		augugagccuggggccuggaccc	ggagauggcccuugagcugguauugg	augugagccuggggccuggacccugggagcaccugggaagcccuccugggggagauggcccuugagcugguauugg	chr1:5989365-5989441	Bladder	SRR333660	2	2	0	0
JHU_ID_02186	JHU_ID_02186.3p		agagagaaacuguagcagccu	acugcucccaguuucuuucauu	acugcucccaguuucuuucauugguugagugcucaccuagccaaagagagaaacuguagcagccu	chr1:59905779-59905844	Lung Adenocarcinoma	SRR1304309	20	20	0	0						CYP2J2
JHU_ID_02187	JHU_ID_02187.3p		uggcugagacaugauuaguguu	cacuaaucaugucucagccuuc	cacuaaucaugucucagccuucuuaaguggcugagacaugauuaguguu	chr1:59916823-59916872	Brain, Prefrontal Cortex	SRR1759214	6	6	0	0						CYP2J2
JHU_ID_02188	JHU_ID_02188.5p	JHU_ID_02188.3p	uuuggucuaaccgguugucuagcu	uagacaaccgguuagaccaa	uuuggucuaaccgguugucuagcuucacguccuguuucuacugauuguuugcaaccagcuuuugcuagacaaccgguuagaccaa	chr1:59921636-59921721	Skeletal	SRR1820680	4	3	0	1						CYP2J2
JHU_ID_02189	JHU_ID_02189.5p		gcugggggggcccgggca	cuggggccaccugggcaa	gcugggggggcccgggcagcagcagggggugggugucgucaggagucuccgaggcaaugcaggugugagcuggggccaccugggcaa	chr1:6013739-6013826	H9 Differentiated Midbrain	SRR1988301	449	449	0	0						KCNAB2
JHU_ID_02190	JHU_ID_02190.5p		acaggaagcagguggcugu	agcccgggccuguccccaagcg	acaggaagcagguggcugugaggagacagcccgggccuguccccaagcg	chr1:6026087-6026136	Dendritic	SRR1708907	3	3	0	0						KCNAB2
JHU_ID_02191	JHU_ID_02191.5p		agagcugaugggauuuucugagc	uuaggucuguuccaugugcuucuua	agagcugaugggauuuucugagcuugaguucaaguugaagguuggcuuuaggucuguuccaugugcuucuua	chr1:60584719-60584791	Bladder	SRR333658	4	4	0	0						RP11-776H12.1
JHU_ID_02194	JHU_ID_02194.5p		agagccgcaguggaacuguccccu	gggacuccaacugcgguguucu	agagccgcaguggaacuguccccuccccucugcggcugcuauuuugcagcuaagugaagucgcaguguggggacuccaacugcgguguucu	chr1:6090750-6090841	Dendritic	SRR1708914	1	1	0	0						KCNAB2
JHU_ID_02195	JHU_ID_02195.5p	JHU_ID_02195.3p	uucggcugagugcaguggcuc	gcggaucacuugaggccaggag	uucggcugagugcaguggcucacaccuguaaucccagcacuuugggaggccaaggugggcggaucacuugaggccaggag	chr1:61035003-61035083	Colon adenocarcinoma	SRR1917329	29	25	2	2
JHU_ID_02196	JHU_ID_02196.5p/.3p		ucgccggcagcuguagcggaggu	cuccgcuuccucccggcaccc	cuccgcuuccucccggcacccgcuucgccggcagcuguagcggaggu	chr1:61050375-61050422	Lung	SRR372650	2	2	0	0
JHU_ID_02197	JHU_ID_02197.5p/.3p		uugcccccuucuccccuccucca	ggcggagggggcagggagggggcaggg	ggcggagggggcagggagggggcagggaaaaggccuugcccccuucuccccuccucca	chr1:61077092-61077150	Islet Alpha Cell	SRR1028924	35	35	0	0	TJU_CMC_MD2.ID00149.3p-miR	Ago_842
JHU_ID_02198	JHU_ID_02198.3p		cagacuguaacugcuccucacugc	aggaaaaguaguuuuguuugcu	aggaaaaguaguuuuguuugcuuaagcacauccuguggcagccuauagcugcccgggaguacagacuguaacugcuccucacugc	chr1:61082088-61082173	Neuron iPSC	SRR1777161	2	2	0	0
JHU_ID_02199	JHU_ID_02199.5p		uguuccgaggacugguucc	aaccuguuccuugggcc	uguuccgaggacugguuccuucuguaggcuccaggggagaaccuguuccuugggcc	chr1:61146049-61146105	Epithelium Retinal Pigment	SRR493013	33	33	0	0
JHU_ID_02200	JHU_ID_02200.3p		ucuggcccuguguuucucacc	gcagggacacuggguuaggac	gcagggacacuggguuaggacaggcuguucuggcccuguguuucucacc	chr1:61436950-61436999	Endothelial Aortic	SRR5139121	6	6	0	0
JHU_ID_02202	JHU_ID_02202.5p		cggcggcggcuggcucugc	cucgccaagccccgacugcc	cggcggcggcuggcucugcccggggugcgcgggggcgguguuuccucgccucccccugcgcccgggcucgccaagccccgacugcc	chr1:6180533-6180619	Lung	SRR1608281	1	1	0	0
JHU_ID_02203	JHU_ID_02203.3p		uuauuacugugagaauuaugau	cauaauucucauaguaauaaua	cauaauucucauaguaauaauaguaauguuaauauaauaauaauguuauuauuacugugagaauuaugau	chr1:61846091-61846161	Cervical cancer	SRR1304304	10	10	0	0
JHU_ID_02204	JHU_ID_02204.3p		cgcccgcuugcgcugucgcug	gggagggcgcgggcgcccgggc	gggagggcgcgggcgcccgggcagaggggccgcgggagcucaagcggggcuccgugcgugccccagccgcccgcuugcgcugucgcug	chr1:6206445-6206533	Lung Adenocarcinoma	SRR1013968	8	8	0	0		Ago_154				RNF207
JHU_ID_02206	JHU_ID_02206.3p	JHU_ID_02206.5p	augcucgccaucucucccagg	uggugggagguggcagggcuggg	uggugggagguggcagggcuggggcgcaaaucaagagcaugcucgccaucucucccagg	chr1:6209866-6209925	Colon adenocarcinoma	SRR1917336	9	9	0	0		Ago_156				RNF207
JHU_ID_02207	JHU_ID_02207.3p		ucaaauccugucugacccu	guguuucagacagacuguugagg	guguuucagacagacuguugagggagaaguuuuuaagcagaagacuucccaugucucucaaauccugucugacccu	chr1:62101716-62101792	Breast ductal carcinoma	ERR372265	9269	9269	0	0
JHU_ID_02208	JHU_ID_02208.5p		cccggcgcaccccugcggg	cgcggcggaugcgggacuggc	cccggcgcaccccugcgggcacacccaccgcggcggaugcgggacuggc	chr1:62319311-62319360	Lung	SRR372636	30	30	0	0
JHU_ID_02209	JHU_ID_02209.3p		uggcgggcugcgcggcgcggg	ggcgccgccgcccgcuagu	ggcgccgccgcccgcuaguccgccgcccggcgccauggcgggcugcgcggcgcggg	chr1:6235889-6235945	T cell leukemia	SRR1292463	13	13	0	0	TJU_CMC_MD2.ID00034.3p-miR	Ago_157				ICMT
JHU_ID_02210	JHU_ID_02210.3p		cgagacacuuagaaacaccacccu	uguggcguuucuaccguuucacc	uguggcguuucuaccguuucaccccgagucacaggcgagacacuuagaaacaccacccu	chr1:6262520-6262579	T cell leukemia	SRR1304307	35	35	0	0		Ago_158
JHU_ID_02211	JHU_ID_02211.3p		gccggcaccgggaucccgcggccug	gagccgcggaguccucccaggccu	gagccgcggaguccucccaggccuggccuaggaggcggguggguguggcggggccggcaccgggaucccgcggccug	chr1:62688105-62688182	Retina	ERR973601	2	2	0	0
JHU_ID_02213	JHU_ID_02213.3p		uuuggcucuagugaggcugcucuc	caguagccccuaggccugcuaacug	caguagccccuaggccugcuaacuguagagacucucauuuggcucuagugaggcugcucuc	chr1:6290779-6290840	T cell leukemia	SRR1532970	29	29	0	0		Ago_160				ACOT7
JHU_ID_02214	JHU_ID_02214.3p	JHU_ID_02214.5p	agaaauaugucugauaaaaga	cuuauaugauaugucuccauaccc	cuuauaugauaugucuccauacccauuacaaucuccagcauucccccucaaaccuaagaaauaugucugauaaaaga	chr1:629377-629454	Placenta	SRR567638	112	110	1	1
JHU_ID_02215	JHU_ID_02215.5p	JHU_ID_02215.3p	gggguuuugcaguccuuagc	gggcuuugaaggcucuuggu	gggguuuugcaguccuuagcuguugcagaaauuaaguauugcaacuuacugagggcuuugaaggcucuuggu	chr1:630702-630774	Lung	SRR1608271	2006	1879	27	100		Ago_1
JHU_ID_02216	JHU_ID_02216.3p	JHU_ID_02216.5p	gguaaaauggcugagugaagcauug	gucaacggucggcgaacauc	gucaacggucggcgaacaucagugggggugagguaaaauggcugagugaagcauug	chr1:631036-631092	T cell leukemia	SRR1292458	2661642	2661624	0	18
JHU_ID_02217	JHU_ID_02217.3p	JHU_ID_02217.5p	caucauaaucggaggcuuuggcaa	gucacagcccaugcauuuguaauaa	gucacagcccaugcauuuguaauaaucuucuucauaguaauacccaucauaaucggaggcuuuggcaa	chr1:631245-631313	Kidney	ERR038420	696	695	0	1
JHU_ID_02218	JHU_ID_02218.5p		aagauauauaggauuuagcc	uuuuucuaauaucuuuu	aagauauauaggauuuagccuauaauuuaacuuugacaaaguuaugaaaugguuuuucuaauaucuuuu	chr1:632686-632755	Biliosphere	ERR842911	177	130	47	0
JHU_ID_02219	JHU_ID_02219.5p	JHU_ID_02219.3p	cacuguaaagagguguugguuc	cuaaguuagcuuuacagugggcucu	cacuguaaagagguguugguucucuuaaucuuuaacuuaaaagguuaaugcuaaguuagcuuuacagugggcucu	chr1:633457-633532	Biliosphere	ERR842917	29	20	2	7
JHU_ID_02220	JHU_ID_02220.3p		caccagggaucucuaggcuccuu	aaccccuagacgucucugggccu	aaccccuagacgucucugggccucagacuccuucuguacaagugagggguguacaccagggaucucuaggcuccuu	chr1:6334736-6334812	Retina	ERR973611	2	2	0	0						ACOT7
JHU_ID_02222	JHU_ID_02222.5p	JHU_ID_02222.3p	uccacauguaaaaaaaugaauc	uucauuauuuugcauguguaua	uucauuauuuugcauguguauaaccaguuacugaaacagauauccacauguaaaaaaaugaauc	chr1:63501092-63501156	Tongue squamous carcinoma	SRR1810082	119	118	0	1		Ago_851				ITGB3BP
JHU_ID_02226	JHU_ID_02226.5p		ggauccuguuugugacgcca	aaguccgaggggaguugg	ggauccuguuugugacgccaauuaucagguucuaauugaaguccgaggggaguugg	chr1:64186909-64186965	Cervical cancer	SRR1304304	69	69	0	0
JHU_ID_02227	JHU_ID_02227.3p		uggccagggcuggacacugga	cucugcacuggccaga	cucugcacuggccagagaggcuucuggccagggcuggacacugga	chr1:6426353-6426398	Red Blood Cell	SRR5127232	1	1	0	0						ESPN
JHU_ID_02228	JHU_ID_02228.5p		ucccccucacaccugcuucuggc	ugggcagggcuguggggguca	ucccccucacaccugcuucuggcugccccagggccugagcagcugggcagggcuguggggguca	chr1:6431043-6431107	Blood	SRR2201546	9	9	0	0
JHU_ID_02229	JHU_ID_02229.3p		cgcugugggaucuuggccaagc	caggccaggguccuacucaguc	caggccaggguccuacucagucaugccuucgcugugggaucuuggccaagc	chr1:6444372-6444423	Hepatocellular carcinoma (HepG2)	ERR738413	2	2	0	0						RP1-202O8.2
JHU_ID_02230	JHU_ID_02230.3p		gccggagcgcagcgugguggc	cucucuugcugguuccauaaa	cucucuugcugguuccauaaaucaccgcagccgccgcggcggcccagccgggaagugcacagagccggagcgcagcgugguggc	chr1:64470084-64470168	SkinEpidermis	SRR1259212	16	16	0	0
JHU_ID_02231	JHU_ID_02231.3p		cucccuccggccccggacccccga	cgggguccguggcaagccggagcc	cgggguccguggcaagccggagccuccgagagcacaggcucuggagggggcucccuccggccccggacccccga	chr1:6448144-6448218	Hepatocellular carcinoma (HepG2)	ERR738404	1	1	0	0
JHU_ID_02232	JHU_ID_02232.5p	JHU_ID_02232.3p	cuccagacuuaccuccugcaca	accaggagcaugaguuuggaau	accaggagcaugaguuuggaaugugggcgguggucgucuuaaccuccagacuuaccuccugcaca	chr1:64676829-64676894	Neuron iPSC	SRR1777168	92	60	4	28		Ago_861
JHU_ID_02233	JHU_ID_02233.5p	JHU_ID_02233.3p	ccacccccaccauccucccagg	ggaggagggcgggaaugaggg	ggaggagggcgggaaugagggcggugaggagaagcucacagcccccacccccaccauccucccagg	chr1:6475137-6475203	Astrocytes	SRR5127214	361	359	1	1	TJU_CMC_MD2.ID00037.3p-miR	Ago_166				PLEKHG5
JHU_ID_02235	JHU_ID_02235.5p		aucccagcaccagcuauccac	ggcuggcugggcuggguuca	aucccagcaccagcuauccacagagcccuggcacgggcgcggcuggcugggcuggguuca	chr1:6496366-6496426	Dendritic	SRR1708917	2	2	0	0						PLEKHG5
JHU_ID_02236	JHU_ID_02236.3p		augcucccggucgccgacgaug	ucccagggacccuggggagugacuuug	ucccagggacccuggggagugacuuuggaggagugucuauuaguccuccgaugcucccggucgccgacgaug	chr1:64965501-64965573	Adrenal	SRR944034	2	2	0	0						JAK1
JHU_ID_02237	JHU_ID_02237.5p		cccggacuggccggaggcgcg	cucuuggucgguccuuaggcu	cccggacuggccggaggcgcggccaccgcucuuggucgguccuuaggcu	chr1:64966218-64966267	B Cell_memory	SRR060986	2	2	0	0						JAK1
JHU_ID_02238	JHU_ID_02238.3p		caaccuccaccuccuaauuucaagg	uaguugcccaggcuggagugug	uaguugcccaggcuggagugugguggggcaaucuuggcucacuacaaccuccaccuccuaauuucaagg	chr1:65040129-65040198	Retina	ERR973617	2	2	0	0
JHU_ID_02240	JHU_ID_02240.3p		uguuucaaauuacuugaggauu	uccucagguaauuuaaaauacu	uccucagguaauuuaaaauacuccuaauguuuaguguuucaaauuacuugaggauu	chr1:65054457-65054513	Skin	SRR1259236	5	5	0	0
JHU_ID_02241	JHU_ID_02241.5p	JHU_ID_02241.3p	uccccggaggaggcugaaggca	cccucggcccccggcgcc	uccccggaggaggcugaaggcaggcgcuaggcgcugggcaguggcgcgcccucggcccccggcgcc	chr1:65067210-65067276	Monocyte	SRR926589	10	10	0	0		Ago_869				RP4-535B20.1
JHU_ID_02242	JHU_ID_02242.3p		cugccugggugcuucucaug	ugcagaaacacucacccacagca	ugcagaaacacucacccacagcauggcugccugggugcuucucaug	chr1:6510112-6510158	Skin	SRR2174509	8	8	0	0						PLEKHG5
JHU_ID_02243	JHU_ID_02243.5p	JHU_ID_02243.3p	cccggcgcgcaucucccagcag	ccuggcagacgcgcggcggc	cccggcgcgcaucucccagcagcggcccggcaccuggcagacgcgcggcggc	chr1:65254424-65254476	Cervical cancer	SRR1575597	14	10	0	4
JHU_ID_02244	JHU_ID_02244.5p/.3p		uggcgggcguuaaaggua	ccgcggccccagu	ccgcggccccaguucgggagacauggcgggcguuaaaggua	chr1:65420703-65420744	Endothelial Coronary (0529)	SRR5127228	9	9	0	0						LEPR
JHU_ID_02246	JHU_ID_02246.5p/.3p		cuggcagugugggcuugaagcc	cuggggcccaaccuuaggu	cuggggcccaaccuuagguguuucugaagccuggcagugugggcuugaagcc	chr1:6582621-6582673	Neuron Dopaminergic	SRR5127234	4	4	0	0						ZBTB48
JHU_ID_02247	JHU_ID_02247.3p		ccugagaacugggaggggauggc	aguuuccaucccuuccuugggc	aguuuccaucccuuccuugggcuucagcuugcuggacuggcccugagaacugggaggggauggc	chr1:6584691-6584755	Bladder	DRR013044	2	2	0	0						ZBTB48
JHU_ID_02248	JHU_ID_02248.5p		cugcccuccagaggcugcacccaga	ggggugugggcuuggagggugaa	cugcccuccagaggcugcacccagaacagugggacaugagcaggggugugggcuuggagggugaa	chr1:6592758-6592823	Adult skin fibroblast	SRR2960040	2	2	0	0						KLHL21
JHU_ID_02250	JHU_ID_02250.5p		ugcgucgcagcugcaggcuccggg	cgggccucccugaagcagcugcucgga	ugcgucgcagcugcaggcuccggggcugcccgcccuaggggcucccgggccucccugaagcagcugcucgga	chr1:6603602-6603674	Smooth Muscle Cell Aorta	SRR5127217	2	2	0	0						KLHL21
JHU_ID_02251	JHU_ID_02251.3p	JHU_ID_02251.5p	cuuuuagucauggcuggagaggc	cucugaagccauggccugagcugu	cucugaagccauggccugagcuguaccuuggccccuuuuagucauggcuggagaggc	chr1:66058653-66058710	H9 Differentiated Midbrain	SRR1988301	12	10	0	2
JHU_ID_02252	JHU_ID_02252.5p		cggacgggacccggggcgccac	cuagccuugggccugugcaag	cggacgggacccggggcgccacguaaaggggugcuccgggccccaauucaggcccgaaaccccaacuccuagccuugggccugugcaag	chr1:6624960-6625049	Hepatocellular carcinoma (HepG2)	ERR738414	1	1	0	0						THAP3
JHU_ID_02253	JHU_ID_02253.5p	JHU_ID_02253.3p	gccgggccgggcgagugcuggag	ccagcguccucccgcgacccugcag	gccgggccgggcgagugcuggagcagacuccaaagucuccagcguccucccgcgacccugcag	chr1:6625694-6625757	Cervical cancer	SRR1304304	10	8	0	2	TJU_CMC_MD2.ID00040.5p-miR	Ago_173				THAP3
JHU_ID_02254	JHU_ID_02254.3p		uucaccaggcacugcaggggcaca	uaccuuggaggccuccgugagga	uaccuuggaggccuccgugaggaugagcuucgaguccuucaccaggcacugcaggggcaca	chr1:6637195-6637256	Lung Adenocarcinoma	SRR1013979	2	2	0	0						DNAJC11
JHU_ID_02255	JHU_ID_02255.5p	JHU_ID_02255.3p	gcagcugggaaauucugaaucaca	uuuagaguucuccagcaggcuga	uuuagaguucuccagcaggcugauuggcuuagcagcugggaaauucugaaucaca	chr1:66563582-66563637	Retina	ERR973618	16	9	0	7						SGIP1
JHU_ID_02256	JHU_ID_02256.3p		uggucuugaacuccuggcc	ucaggaucucgcuaug	ucaggaucucgcuauguugcucaaacuggucuugaacuccuggcc	chr1:6685058-6685103	Islet Beta Cell	SRR873410	13	13	0	0						DNAJC11
JHU_ID_02257	JHU_ID_02257.5p		aggggcugccgcagaacgc	cgcaugcgcagcuuccucc	aggggcugccgcagaacgcgccuggcuugcucuccgccggcugccaaaggcgcaugcgcagcuuccucc	chr1:66925236-66925305	CD3+ T Cell Splenic	SRR5127200	3	3	0	0						MIER1
JHU_ID_02258	JHU_ID_02258.3p		ccugggccggggaggaguggagu	ucccccucccugucccggagc	ucccccucccugucccggagccgggcgcccccggcccugggccggggaggaguggagu	chr1:66930415-66930473	Dendritic	SRR1708909	7	7	0	0		Ago_875				MIER1
JHU_ID_02259	JHU_ID_02259.5p/.3p		uauccccaaguuuuacuacugcc	caguaguaaaacuuggggauauu	caguaguaaaacuuggggauauuuuacagacuauguaaaauauccccaaguuuuacuacugcc	chr1:66944383-66944446	Placenta	SRR822454	6	6	0	0		Ago_876				MIER1
JHU_ID_02260	JHU_ID_02260.5p		cgcgggugucucuucgugcucc	ggccugagauccagccag	cgcgggugucucuucgugcucccaauggacgcguggcacgcggcguggcugcguccucgggggccugagauccagccag	chr1:6702013-6702092	Skin	SRR2174525	4	4	0	0
JHU_ID_02261	JHU_ID_02261.5p		augcaucuauuugacagacc	uuuccacuacagaugcaaga	augcaucuauuugacagaccuggaguaguuacugucugcugcuaagguuuccacuacagaugcaaga	chr1:67102712-67102779	Bladder	DRR013043	17	17	0	0						SNORA31
JHU_ID_02262	JHU_ID_02262.5p		agagacauggcuuauggaaacu	uuuccauaagccaugucucaau	agagacauggcuuauggaaacucugaaagauaucuuucaugcagaguuugaaaaauaucauucagaguuuccauaagccaugucucaau	chr1:67217665-67217754	Lung	SRR1216779	1	1	0	0
JHU_ID_02263	JHU_ID_02263.3p		ucugccucugccuagcaccugga	cauuugcuaggaggggaggaca	cauuugcuaggaggggaggacacacuauuguguuucuguugucugccucugccuagcaccugga	chr1:67393106-67393170	Dendritic	SRR1708910	2	2	0	0						IL12RB2
JHU_ID_02265	JHU_ID_02265.3p		ugaguugagccguugggaaau	cucucaacuguuaggacuuucu	cucucaacuguuaggacuuucucauaacuugcuggggugaguugagccguugggaaau	chr1:67429338-67429396	Cervical cancer	SRR1304304	94	94	0	0		Ago_877
JHU_ID_02266	JHU_ID_02266.5p		accggacaggaaggacac	gucucuuccuuccgaggu	accggacaggaaggacacagucucuuccuuccgaggu	chr1:67542951-67542988	Lung Adenocarcinoma	SRR1013979	2	2	0	0
JHU_ID_02267	JHU_ID_02267.5p	JHU_ID_02267.3p	gcucccggggcugaaggacguu	cguggggucccgguggcug	gcucccggggcugaaggacguucccggggaagccgcugcuggcgcguggggucccgguggcug	chr1:6784906-6784969	Retina	ERR973604	42	41	0	1
JHU_ID_02268	JHU_ID_02268.3p		acucggccgcgcuccgccccccc	uggggcgccgcgcuccgccggcccc	uggggcgccgcgcuccgccggccccgcgagucaccucaggacucggccgcgcuccgccccccc	chr1:6785730-6785793	B cell lymphoblastoid	SRR1304313	3	3	0	0		Ago_176				CAMTA1
JHU_ID_02269	JHU_ID_02269.3p		augggaggaugaggucugacca	gcagaccuaggacccaugg	gcagaccuaggacccaugguacaaguuaugggaggaugaggucugacca	chr1:68159521-68159570	Embryonic kidney	SRR1240816	12	12	0	0						WLS
JHU_ID_02270	JHU_ID_02270.3p		agggggcuguagguggcagaggg	cucugcccaccguggccccauca	cucugcccaccguggccccaucagcacaauucucuugauuagggggcuguagguggcagaggg	chr1:68329916-68329979	Testes	SRR333680	2	2	0	0
JHU_ID_02271	JHU_ID_02271.5p		uuauaggaggagcaaacguagc	uacguuugauccuccuauaaua	uuauaggaggagcaaacguagcacuuacucacccauuguaaguguuacguuugauccuccuauaaua	chr1:69088299-69088366	Placenta	SRR822453	1	1	0	0		Ago_885				RP11-424D14.1
JHU_ID_02272	JHU_ID_02272.5p	JHU_ID_02272.3p	cgauuuuagaacuuuccugcuu	cauuuagugcuauaaauu	cgauuuuagaacuuuccugcuuucuccugugggcauuuagugcuauaaauu	chr1:69808775-69808826	Epithelium Retinal Pigment	SRR493013	70	66	0	4						LRRC7
JHU_ID_02273	JHU_ID_02273.5p		uuuugaaggccacagggc	uuaggaugggaaguugaagagg	uuuugaaggccacagggcaggggaguagguuuaaaauggcucugcuuaggaugggaaguugaagagg	chr1:7000397-7000464	Lung Adenocarcinoma	SRR1304309	4	4	0	0						CAMTA1
JHU_ID_02274	JHU_ID_02274.5p	JHU_ID_02274.3p	ucugaugacagcagauaagugcc	gcacuuaccugcugucaucaga	ucugaugacagcagauaagugccagugaacagcuaaaguucaguggcacuuaccugcugucaucaga	chr1:7193481-7193548	Platelet	SRR1592244	3	2	0	1	TJU_CMC_MD2.ID00041.5p-miR
JHU_ID_02275	JHU_ID_02275.3p	JHU_ID_02275.5p	uugccaucguuugagggccugagcc	acagacucucaaccuugggcagcc	acagacucucaaccuugggcagccauggagaaauucccuuauuccucuuugccaucguuugagggccugagcc	chr1:7250235-7250308	Brain, Prefrontal Cortex	ERR409882	4	3	0	1
JHU_ID_02276	JHU_ID_02276.3p	JHU_ID_02276.5p	gaucaagguugcgcuguccuu	uaggagaacgcacccuguugugaac	uaggagaacgcacccuguugugaaccgugcaugugagggaucaagguugcgcuguccuu	chr1:736819-736878	Colon adenocarcinoma	SRR1917329	148	135	0	13
JHU_ID_02277	JHU_ID_02277.5p		gaagaaagaaggaaugaacu	guaauucuacucuuuucuucug	gaagaaagaaggaaugaacuuggaaggaagacaaaguccauuugucuucuuaguaacuguaauucuacucuuuucuucug	chr1:73976271-73976351	Breast ductal carcinoma	ERR372265	26	26	0	0
JHU_ID_02279	JHU_ID_02279.5p		gccuggggcaggaguggaacc	ggccucucccugcagccuugccc	gccuggggcaggaguggaaccggggcaucuccccuagggccucucccugcagccuugccc	chr1:7473182-7473242	Thyroid	SRR1291268	2	2	0	0
JHU_ID_02280	JHU_ID_02280.3p	JHU_ID_02280.5p	ugucccaucugggucgcca	uugucccaucugggucgcca	uugucccaucugggucgccaaaaugugucccaucugggucgcca	chr1:74744592-74744636	T cell leukemia	SRR1292458	2322	2279	0	43						TYW3
JHU_ID_02281	JHU_ID_02281.3p		ucuguccgggcugcagaagaggg	cugguguagccucugcucccu	cugguguagccucugcucccuucucuguccgggcugcagaagaggg	chr1:7474704-7474750	T cell leukemia	SRR1532969	5	5	0	0
JHU_ID_02282	JHU_ID_02282.5p		ucuucucugagcccccaggg	cugggcgcuuggcacacaggagg	ucuucucugagcccccagggccaagccugggcgcuuggcacacaggagg	chr1:7549849-7549898	Lung Adenocarcinoma	SRR1304309	3	3	0	0
JHU_ID_02283	JHU_ID_02283.3p	JHU_ID_02283.5p	ugcuccccgcgcgccggcucugc	gaguccgcgcugcgggagcggg	gaguccgcgcugcgggagcggguggcuugcaccugcuccccgcgcgccggcucugc	chr1:75614944-75615000	Cervical cancer	SRR1304304	256	255	0	1		Ago_898
JHU_ID_02284	JHU_ID_02284.5p	JHU_ID_02284.3p	aaaggauuacuuuucacugaau	uucagugaaaaguaauccuuuc	uucagugaaaaguaauccuuucuuaaauucugucuaccacccaauccuuuaagaaaggauuacuuuucacugaau	chr1:75769433-75769508	Brain, Prefrontal Cortex	SRR1759213	4	2	0	2
JHU_ID_02285	JHU_ID_02285.3p		cugcagacucauccuccuggg	caggcuggaaugcaguagug	caggcuggaaugcaguagugggaucaggacucacugcagacucauccuccuggg	chr1:75770417-75770471	SkinDermis	SRR1259222	4	4	0	0
JHU_ID_02286	JHU_ID_02286.5p		acaucagggaucagggguggg	cagcccugagauguga	acaucagggaucaggggugggggacugucgacagcccugagauguga	chr1:7586719-7586766	SkinDermis	SRR1259216	2	2	0	0
JHU_ID_02287	JHU_ID_02287.3p		aaauuccaaucuuucucugagc	ucagagaaauuauaggaauugcuca	ucagagaaauuauaggaauugcucaaggucacaugaaauuccaaucuuucucugagc	chr1:76120570-76120627	Neuron iPSC	SRR1777161	78	78	0	0						ST6GALNAC3
JHU_ID_02289	JHU_ID_02289.5p		ugccugacugugacuuugc	aggguccuacaguggucccagc	ugccugacugugacuuugcucucugaaaaggcuccaucugccaggcaggguccuacaguggucccagc	chr1:7679294-7679362	Epithelium Retinal Pigment	SRR493013	10	10	0	0
JHU_ID_02290	JHU_ID_02290.5p		aacuggcugggcuuaauggu	cauuuucccagccagccau	aacuggcugggcuuaaugguccuuacugugucccgggccauuuucccagccagccau	chr1:77039293-77039350	Skin	SRR2174525	3	3	0	0
JHU_ID_02291	JHU_ID_02291.5p/.3p		cgccgcagggcgcgccggggc	gccggcuccucccgccggcugc	gccggcuccucccgccggcugcauugcagacgccgccgccgcagggcgcgccggggc	chr1:7704129-7704186	Neuroblastoma	SRR1304311	34	34	0	0		Ago_184
JHU_ID_02292	JHU_ID_02292.3p	JHU_ID_02292.5p	cggcggcucggcgcaagccugacg	ccgggcugggccgggccgggc	ccgggcugggccgggccgggcggggccgggcggggcgcgggagccagugagcggcggcucggcgcaagccugacg	chr1:7704793-7704868	Retina	ERR973602	4	3	0	1		Ago_185
JHU_ID_02293	JHU_ID_02293.5p		cugugcucggacguuaaag	uuaggccaggcguggug	cugugcucggacguuaaagaagagacauuuaggccaggcguggug	chr1:77733078-77733123	Lung	SRR1608285	1	1	0	0						USP33
JHU_ID_02294	JHU_ID_02294.3p		gccucgugaguaggugggacu	ugccaucuacugggcuc	ugccaucuacugggcucaggugauccucucaccucagccucgugaguaggugggacu	chr1:77744723-77744780	Brain, Prefrontal Cortex	SRR1759217	1	1	0	0						USP33
JHU_ID_02295	JHU_ID_02295.5p		ugcccgggccaguuucgaacucc	aguugucgggauuacaggcgugagggac	ugcccgggccaguuucgaacuccugaguugaagcaaucuucucaccuuggccaucagaguugucgggauuacaggcgugagggac	chr1:777916-778001	BrainFrontal	SRR448330	26	26	0	0						RP11-206L10.2
JHU_ID_02299	JHU_ID_02299.5p		gcggguagggggagccagcuucag	gaggcagccuuccuuccccag	gcggguagggggagccagcuucagcccgguaaugaagcccauuucagccucauuccuuucccauggcggaggcagccuuccuuccccag	chr1:77888233-77888322	Fibroblast Periodonal ligament	SRR5127227	3	3	0	0						NEXN-AS1
JHU_ID_02300	JHU_ID_02300.5p/.3p		cagggccuggaacuccaaugggac	cccauggugucccaggcccccau	cccauggugucccaggcccccauggaccuccugggccuccagggccuggaacuccaaugggac	chr1:77960392-77960455	Islet Beta Cell	SRR873401	286	286	0	0		Ago_912				FUBP1
JHU_ID_02301	JHU_ID_02301.3p		uucagagcucuuauuaauaggg	cuauuaauaagagcucugaaaa	cuauuaauaagagcucugaaaaauaagaguuuucagagcucuuauuaauaggg	chr1:78104309-78104362	Myoblast Skeletal Muscle	SRR5127218	12	12	0	0
JHU_ID_02302	JHU_ID_02302.3p		uuuagaugugcgacaagacuu	guuuugucucacaucuaaaug	guuuugucucacaucuaaaugugacacaucuaaauaugacauuuagaugugcgacaagacuu	chr1:78572427-78572489	Embryonic kidney	SRR1240816	84	84	0	0
JHU_ID_02304	JHU_ID_02304.5p	JHU_ID_02304.3p	aggcgucuccgggcugac	cagcccugggagccucucaac	aggcgucuccgggcugaccgcggccgcagcuccgcuccucugccugagccgugcggcagcccugggagccucucaac	chr1:8026504-8026581	Smooth Muscle Cell, Coronary	SRR5127211	122	88	1	33		Ago_186
JHU_ID_02305	JHU_ID_02305.3p	JHU_ID_02305.5p	uaaaaauaaccugaauuuaaac	uaaaugcagguuauuuuuaaacu	uaaaugcagguuauuuuuaaacuauaguaaauaacaauuuaaaaauaaccugaauuuaaac	chr1:80659226-80659287	Epithelium Renal Cortex	SRR5127204	49	47	0	2
JHU_ID_02306	JHU_ID_02306.3p		ccugggaggcugagcgaga	ucacuugaauccgggagau	ucacuugaauccgggagauggugguggcagugagccaagauggcgccacugcacuccagccugggaggcugagcgaga	chr1:81099054-81099132	Embryonic lung fibroblast	SRR2960037	2	2	0	0
JHU_ID_02307	JHU_ID_02307.3p		cauaagguaguuauugca	cagcuacucugugaa	cagcuacucugugaaguccauaagguaguuauugca	chr1:81656162-81656198	Melanocyte	SRR1913137	55	55	0	0
JHU_ID_02308	JHU_ID_02308.3p		augcugcgucaggaccug	aauuguggcagcagaa	aauuguggcagcagaagcuuccucugggcucagacucaggcugaugcugcgucaggaccug	chr1:817467-817528	Lung	SRR372632	8	8	0	0						FAM87B
JHU_ID_02309	JHU_ID_02309.5p		ccucccgcgcggacucggcggc	ccucuccggccggggua	ccucccgcgcggacucggcggccgaggacccgcucgcggccggccucggcccucuccggccggggua	chr1:81802086-81802153	Embryonic kidney	SRR1240816	9	9	0	0
JHU_ID_02310	JHU_ID_02310.5p	JHU_ID_02310.3p	ugugcuacaaaucgcgucuguga	aacagucgcaauuuguaaacacaga	aacagucgcaauuuguaaacacagaaaagaggaaugaaaugaaaggccgugucugugcuacaaaucgcgucuguga	chr1:8259681-8259757	Colon adenocarcinoma	SRR1917329	263	226	0	37	TJU_CMC_MD2.ID00044.3p-miR
JHU_ID_02311	JHU_ID_02311.5p		ucuguguuuuggacaucuccacu	uggagauguccaaagcacagauu	ucuguguuuuggacaucuccacuuguuaaguggaguuaagauuauaacuuguuaaguggagauguccaaagcacagauu	chr1:8264193-8264272	Liver	SRR950886	26	26	0	0	TJU_CMC_MD2.ID00045.5p-miR
JHU_ID_02312	JHU_ID_02312.5p		uagaggucgggguggagaugg	cucuuauuucuccucucug	uagaggucgggguggagauggaaaaggcagaggcuuagcucugagcucgccccucccucuuauuucuccucucug	chr1:82863952-82864027	Testes	SRR333680	2	2	0	0
JHU_ID_02314	JHU_ID_02314.3p		acucuugggguguugucaua	ugacaacaccccaagaauau	ugacaacaccccaagaauauucuaaaauauucuaaaaagaauacucuugggguguugucaua	chr1:83763084-83763146	B Cell Centroblast	SRR060981	1	1	0	0	TJU_CMC_MD2.ID00158.5p-miR	Ago_930				RP11-475O6.1
JHU_ID_02315	JHU_ID_02315.3p		uggcggacugcccaggggccauc	uggccccuggggcccaggcuccagc	uggccccuggggcccaggcuccagccaugagugcuucugagcuggcggacugcccaggggccauc	chr1:84086314-84086379	Neuroblastoma	SRR1304311	4	4	0	0		Ago_931				PRKACB
JHU_ID_02317	JHU_ID_02317.3p		cccgcggccgcgccgggcu	ccccggcuggcggacaggagggcg	ccccggcuggcggacaggagggcggcggcaauccaggccgccuuuugcagccgcccgcggccgcgccgggcu	chr1:8423799-8423871	Hepatocellular carcinoma (HepG2)	ERR738414	1	1	0	0						RERE
[truncated: 19,456 more rows]
