# Supplementary material for: Toward the human cellular microRNAome
Source: HighWire-hosted journal article supplement (doi:10.1101/gr.222067.117), 2017-09-06
Supplement: Supplemental_Table_S8.xlsx [file Supplemental_Table_S8.xlsx]

## Sheet: Sheet1
Novel JHU ID Locus	Novel JHU ID	Known miRNA	miRNA full name	3p or 5p	5p miRNA sequence (identified or predicted)	3p miRNA sequence (identified or predicted)	Pre-miRNA sequence	Chromosome Location	Orientation in Chr.	Representative Tissue/Cell	SRA number	No. of samples identified	total read count	mature read count	loop read count	star read count	Matched TJU miRNA	Matched Ago miRNA
JHU_ID_25159	JHU_ID_25159.3p	hsa-miR-190b	hsa-miR-190b_MIMAT0004929_Homo_sapiens_miR-190b	3p	cuaaaugucaaacauauucuuac	gugauauguuugauauuggguu	gugauauguuugauauuggguuguuuaauuaggaaccaacuaaaugucaaacauauucuuac	chr1:154193672-154193734	-	Retina	ERR973604	1	6	6	0	0	TJU_CMC_MD2.ID00205.3p-miR	Ago_1365
JHU_ID_25160	JHU_ID_25160.3p	hsa-miR-4258	hsa-miR-4258_MIMAT0016879_Homo_sapiens_miR-4258	3p	uucggucggucuucuucccuggg	uuggaggcugaccucuua	uuggaggcugaccucuuacuuucggucggucuucuucccuggg	chr1:154975716-154975759	+	H9 Differentiated Mesenchymal	SRR1988298	1	3	3	0	0
JHU_ID_25161	JHU_ID_25161.3p	hsa-miR-5191	hsa-miR-5191_MIMAT0021122_Homo_sapiens_miR-5191	3p	uccuggccaacucuuccaagc	auagaagagaggauaggaag	auagaagagaggauaggaagaaugaagugcugggcgcuuagggggauccuggccaacucuuccaagc	chr1:201719570-201719637	+	Skin	SRR2174541	28	68	68	0	0	TJU_CMC_MD2.ID00255.5p-miR	Ago_1785
JHU_ID_25162	JHU_ID_25162.3p	hsa-miR-1231	hsa-miR-1231_MIMAT0005586_Homo_sapiens_miR-1231	3p	ggcuugcugucuguccagucugc	ugucugggcggacagcugcagg	ugucugggcggacagcugcaggaaagggaagaccaaggcuugcugucuguccagucugc	chr1:201808616-201808675	+	BrainPrefrontalCortex	SRR1759214	2	14	14	0	0	TJU_CMC_MD2.ID00256.3p-miR
JHU_ID_25163	JHU_ID_25163.3p	hsa-miR-1256	hsa-miR-1256_MIMAT0005907_Homo_sapiens_miR-1256	3p	uaaagagaagucaaugcaugaca	ccaggcauugacuucucacuagc	ccaggcauugacuucucacuagcugugaaaguccuagcuaaagagaagucaaugcaugaca	chr1:20988339-20988400	-	Fibroblast Dermal (neonatal)	SRR5127225	30	309	309	0	0	TJU_CMC_MD2.ID00079.3p-miR	Ago_385
JHU_ID_25164	JHU_ID_25164.5p	hsa-miR-4425	hsa-miR-4425_MIMAT0018940_Homo_sapiens_miR-4425	5p	auggucccauugaaucccaa	gggauucagcaggaccauuc	auggucccauugaaucccaacagcuuugcgaaguguuguugggauucagcaggaccauuc	chr1:25023516-25023576	+	Lung	SRR1216774	3	5	5	0	0	TJU_CMC_MD2.ID00088.5p-miR	Ago_442
JHU_ID_25165	JHU_ID_25165.5p	hsa-miR-1976	hsa-miR-1976_MIMAT0009451_Homo_sapiens_miR-1976	5p	guggcagcaaggaaggcaggggu	cuccugcccuccuugcuguagacuu	guggcagcaaggaaggcagggguccuaagguguguccuccugcccuccuugcuguagacuu	chr1:26554539-26554600	+	Plasma	SRR822446	75	341	338	0	3	TJU_CMC_MD2.ID00091.5p-miR	Ago_461
JHU_ID_25166	JHU_ID_25166.5p	hsa-miR-4420	hsa-miR-4420_MIMAT0018933_Homo_sapiens_miR-4420	5p	cucuugguaugaacaucug	gaugucuguagcugagac	cucuugguaugaacaucuguguguucaugucucucugugcacaggggacgagagucacugaugucuguagcugagac	chr1:30739155-30739232	-	Lung	SRR1608277	1	2	2	0	0
JHU_ID_25167	JHU_ID_25167.5p	hsa-miR-4254	hsa-miR-4254_MIMAT0016884_Homo_sapiens_miR-4254	5p	agggugggguggcuccucugcagu	ugccuggagcuacuccaccaucu	agggugggguggcuccucugcagugaguaggucugccuggagcuacuccaccaucu	chr1:31758670-31758726	-	Neuron Dopaminergic	SRR5127234	10	29	29	0	0
JHU_ID_25168	JHU_ID_25168.5p	hsa-miR-3659	hsa-miR-3659_MIMAT0018080_Homo_sapiens_miR-3659	5p	augcccuuguacacaacacacgug	ugaguguugucuacgagggcaucc	augcccuuguacacaacacacgugcugcuuguauagacaugaguguugucuacgagggcaucc	chr1:38089250-38089313	+	Epithelium Keratinocyte (Adult)	SRR5127203	6	7	7	0	0	TJU_CMC_MD2.ID00118.5p-miR
JHU_ID_25169	JHU_ID_25169.3p	hsa-miR-761	hsa-miR-761_MIMAT0010364_Homo_sapiens_miR-761	3p	uuucacuuugcugcuccuccu	gaggagcagcagggugaaacu	gaggagcagcagggugaaacugacacaguucuggugaguuucacuuugcugcuccuccu	chr1:51836342-51836401	-	Blood	SRR2061749	1	1	1	0	0
JHU_ID_25170	JHU_ID_25170.3p	hsa-miR-4422	hsa-miR-4422_MIMAT0018935_Homo_sapiens_miR-4422	3p	gcccuucuugaugcucuugauug	gacaaaagcaucaggaaguaccc	gacaaaagcaucaggaaguacccaccauguaccagugggcccuucuugaugcucuugauug	chr1:55225653-55225714	+	Platelet	ERR747967	49	102	102	0	0	TJU_CMC_MD2.ID00143.3p-miR	Ago_812
JHU_ID_25171	JHU_ID_25171.3p	hsa-miR-4689	hsa-miR-4689_MIMAT0019778_Homo_sapiens_miR-4689	3p	cccaugccauguguccucaugg	uugaggagacaugguggggg	uugaggagacauggugggggccggucaggcagcccaugccauguguccucaugg	chr1:5862678-5862732	-	Hepatocellular carcinoma (HepG2)	ERR738414	3	3	3	0	0
JHU_ID_25172	JHU_ID_25172.3p	hsa-miR-5697	hsa-miR-5697_MIMAT0022490_Homo_sapiens_miR-5697	3p	uuuaucaugaaacgcuugagg	ucaaguaguuucaugauaaagg	ucaaguaguuucaugauaaaggguguaugagagaucaacccuuuaucaugaaacgcuugagg	chr1:9967390-9967452	+	Hepatocellular carcinoma (HepG2)	ERR738417	8	16	16	0	0
JHU_ID_25173	JHU_ID_25173.3p	hsa-miR-936	hsa-miR-936_MIMAT0004979_Homo_sapiens_miR-936	3p	gagagaccuugcuucuacuuu	aguagagggaggaaucgcag	aguagagggaggaaucgcagaaaucacuccaggagcaacugagagaccuugcuucuacuuu	chr10:104048109-104048170	-	Nasopharyngeal carcinoma	SRR1564521	1	1	1	0	0
JHU_ID_25174	JHU_ID_25174.3p	hsa-miR-2110	hsa-miR-2110_MIMAT0010133_Homo_sapiens_miR-2110	3p	ucuuggcugguuggaccccg	augugucagcuccgcaggggu	augugucagcuccgcagggguuuggggaaacggccgcugagugaggcgucggcuguguuucucaccgcggucuuuuccucccacucuuggcugguuggaccccg	chr10:114174089-114174193	-	Breast adenocarcinoma	ERR227917	378	15486	15470	16	0	TJU_CMC_MD2.ID00439.3p-miR	Ago_11646
JHU_ID_25175	JHU_ID_25175.3p	hsa-miR-4681	hsa-miR-4681_MIMAT0019766_Homo_sapiens_miR-4681	3p	cuaacaggugcaggcugcaga	ugcaggcuguaucugcagggca	ugcaggcuguaucugcagggcauugugcuaacaggugcaggcugcaga	chr10:119377983-119378031	+	Lung	SRR1608273	1	1	1	0	0
JHU_ID_25176	JHU_ID_25176.3p	hsa-miR-4682	hsa-miR-4682_MIMAT0019767_Homo_sapiens_miR-4682	3p	ccagagcuccaaggcucagu	ugaguuccuggagccugguc	ugaguuccuggagccuggucugucacuggggaaguccagagcuccaaggcucagu	chr10:119958524-119958579	+	Nasopharyngeal carcinoma	SRR1564521	1	1	1	0	0
JHU_ID_25177	JHU_ID_25177.5p	hsa-miR-3941	hsa-miR-3941_MIMAT0018357_Homo_sapiens_miR-3941	5p	augcucaguuguguguagauuga	auuuuacacacaacugaggauca	augcucaguuguguguagauugaaagcccuaauuuuacacacaacugaggauca	chr10:122416990-122417044	+	Osteoblast	SRR5127233	5	10	10	0	0	TJU_CMC_MD2.ID00447.5p-miR	Ago_11699
JHU_ID_25178	JHU_ID_25178.3p	hsa-miR-1265	hsa-miR-1265_MIMAT0005918_Homo_sapiens_miR-1265	3p	caauacuugaccacauuuuga	aggauguggucaaguguuguu	aggauguggucaaguguuguuaaggcauguucaggaacaauacuugaccacauuuuga	chr10:14436590-14436648	+	Lung	SRR1608279	1	1	1	0	0
JHU_ID_25179	JHU_ID_25179.3p	hsa-miR-938	hsa-miR-938_MIMAT0004981_Homo_sapiens_miR-938	3p	acaccuuuaagaacuugg	augugcccuuaaaggugaac	augugcccuuaaaggugaacccagugcaccuucaugaaccgugguacaccuuuaagaacuugg	chr10:29602272-29602335	-	Skeletal	SRR1820680	1	1	1	0	0
JHU_ID_25180	JHU_ID_25180.5p	hsa-miR-3611	hsa-miR-3611_MIMAT0017988_Homo_sapiens_miR-3611	5p	aauaagaauuucuuuuucuucac	gaagaaagaaauucuuacuag	aauaagaauuucuuuuucuucacaauuaugaaagaaaagaaauugugaagaaagaaauucuuacuag	chr10:35079604-35079671	-	Nasopharyngeal carcinoma	SRR1564521	43	87	87	0	0		Ago_11138
JHU_ID_25182	JHU_ID_25182.5p	hsa-miR-3924	hsa-miR-3924_MIMAT0018199_Homo_sapiens_miR-3924	5p	uaguagucaaauaugcagaucu	auauguauaugugacugcuacu	uaguagucaaauaugcagaucuaugucauauauacagauauguauaugugacugcuacu	chr10:57304488-57304547	-	Neuron Cortical	SRR5127209	6	37	37	0	0
JHU_ID_25183	JHU_ID_25183.5p	hsa-miR-3155b	hsa-miR-3155b_MIMAT0019012_Homo_sapiens_miR-3155b	5p	ccucccacugcagagccugggga	cccaggcucugcagugggaacug	ccucccacugcagagccuggggagccggacagcucccuucccaggcucugcagugggaacug	chr10:6152207-6152269	+	Endothelial Coronary	SRR5127228	10	26	26	0	0	TJU_CMC_MD2.ID00321.5p-miR
JHU_ID_25184	JHU_ID_25184.5p	hsa-miR-606	hsa-miR-606_MIMAT0003274_Homo_sapiens_miR-606	5p	ccaucauaguaaacuacugaaa	uuaguaguuuuacuaugaugagg	uuaguaguuuuacuaugaugaggugugccauccaccccaucauaguaaacuacugaaa	chr10:75552472-75552530	+	Hepatocellular carcinoma (HepG2)	ERR738414	11	19	18	0	1
JHU_ID_25185	JHU_ID_25185.3p	hsa-miR-4678	hsa-miR-4678_MIMAT0019762_Homo_sapiens_miR-4678	3p	aaagauucugagcaauaaccuauu	aagguauuguucagacuuauga	aagguauuguucagacuuaugauuuuuggggucaaagauucugagcaauaaccuauu	chr10:87503890-87503947	+	Lung	SRR372618	49	164	164	0	0	TJU_CMC_MD2.ID00396.3p-miR
JHU_ID_25186	JHU_ID_25186.3p	hsa-miR-4491	hsa-miR-4491_MIMAT0019026_Homo_sapiens_miR-4491	5p	acguuaauguggacuggugug	caccaguccacauuaauauug	caccaguccacauuaauauugucugguccacguuaauguggacuggugug	chr11:111347765-111347815	-	B Cell Centroblast	SRR060981	2	2	2	0	0
JHU_ID_25187	JHU_ID_25187.3p	hsa-miR-4688	hsa-miR-4688_MIMAT0019777_Homo_sapiens_miR-4688	3p	cugauccucagcugcccucucuc	guaggggcagcagaggaccuggg	guaggggcagcagaggaccugggccuggacauggcacucccugauccucagcugcccucucuc	chr11:46376455-46376518	+	BrainPrefrontalCortex	SRR1759217	40	85	83	2	0		Ago_12182
JHU_ID_25188	JHU_ID_25188.3p	hsa-miR-6745	hsa-miR-6745_MIMAT0027391_Homo_sapiens_miR-6745	3p	ccaggccccuccucucccacccaga	uggguggaagaaggucugguu	uggguggaagaaggucugguucucaccaggccccuccucucccacccaga	chr11:47179585-47179635	-	Hepatocellular carcinoma (HepG2)	ERR738403	4	6	6	0	0		Ago_12190
JHU_ID_25189	JHU_ID_25189.3p	hsa-miR-3161	hsa-miR-3161_MIMAT0015035_Homo_sapiens_miR-3161	3p	ugggccuuuguuuuuaccaagu	ugauaagaacagaggcccaga	ugauaagaacagaggcccagauugaaguugaauagugcugggccuuuguuuuuaccaagu	chr11:48096792-48096852	+	Fibroblast Aorta Adventitia	SRR5127206	2	2	2	0	0	TJU_CMC_MD2.ID00530.3p-miR
JHU_ID_25190	JHU_ID_25190.3p	hsa-miR-4489	hsa-miR-4489_MIMAT0019023_Homo_sapiens_miR-4489	3p	ugccugacccugucccaccccaca	ggggguggggcuagugaugcagg	ggggguggggcuagugaugcaggacgcuggggacuggagaaguccugccugacccugucccaccccaca	chr11:65649192-65649261	+	Stromal cell Prostate	SRR5127226	27	73	68	5	0	TJU_CMC_MD2.ID00565.3p-miR	Ago_12424
JHU_ID_25191	JHU_ID_25191.3p	hsa-miR-3164	hsa-miR-3164_MIMAT0015038_Homo_sapiens_miR-3164	3p	cguuuugcuugaagucgcaguu	cugugacuuuaagggaaauggc	cugugacuuuaagggaaauggcgcacagcagacccugcaaucaugccguuuugcuugaagucgcaguu	chr11:69083184-69083252	+	BrainPrefrontalCortex	SRR1759216	57	231	231	0	0	TJU_CMC_MD2.ID00587.3p-miR	Ago_12562
JHU_ID_25192	JHU_ID_25192.5p	hsa-miR-3165	hsa-miR-3165_MIMAT0015039_Homo_sapiens_miR-3165	5p	caagguggaugcaaugugaccu	gucacauuguauccaccuuacc	caagguggaugcaaugugaccucaacucuugguccucugaggucacauuguauccaccuuacc	chr11:72072232-72072295	-	Red Blood Cell	SRR5127232	1	1	1	0	0	TJU_CMC_MD2.ID00588.3p-miR	Ago_12620
JHU_ID_25193	JHU_ID_25193.5p	hsa-miR-326	hsa-miR-326_MIMAT0000756_Homo_sapiens_miR-326	5p	uggaggcagggccuuugugaaggcg	ccucugggcccuuccuccagc	uggaggcagggccuuugugaaggcggguggugcucagaucgccucugggcccuuccuccagc	chr11:75335106-75335168	-	Skin	SRR2174513	8	34	34	0	0		Ago_12660
JHU_ID_25194	JHU_ID_25194.3p	hsa-miR-3652	hsa-miR-3652_MIMAT0018072_Homo_sapiens_miR-3652	3p	gggacuugagacucaccggccg	gcuggaggugugaggauccgaaccc	gcuggaggugugaggauccgaacccaggggugggggguggaggcggcuccugcgaucgaaggggacuugagacucaccggccg	chr12:103930427-103930510	+	Breast adenocarcinoma	SRR029054	2	3	3	0	0
JHU_ID_25195	JHU_ID_25195.5p	hsa-miR-620	hsa-miR-620_MIMAT0003289_Homo_sapiens_miR-620	5p	uaucuauaucuagcuccguaua	uauggagauagauauagaaaua	uaucuauaucuagcuccguauauauauauauauauauauagauaucuccauauauauggagauagauauagaaaua	chr12:116148573-116148649	-	Nasopharyngeal carcinoma	SRR1564521	1	1	1	0	0
JHU_ID_25196	JHU_ID_25196.3p	hsa-miR-5188	hsa-miR-5188_MIMAT0021119_Homo_sapiens_miR-5188	3p	ucaauaaucggacccauuuaaac	uucaauggguacgauuauuguaa	uucaauggguacgauuauuguaagcaggauccauucaauaaucggacccauuuaaac	chr12:124915571-124915628	+	Fibroblast Dermal (neonatal)	SRR5127225	36	70	70	0	0	TJU_CMC_MD2.ID00789.5p-miR	Ago_13941
JHU_ID_25197	JHU_ID_25197.3p	hsa-miR-1293	hsa-miR-1293_MIMAT0005883_Homo_sapiens_miR-1293	3p	acaaaucuccggaccacuuag	ggguggucuggagauuugugc	ggguggucuggagauuugugcagcuuguaccugcacaaaucuccggaccacuuag	chr12:50234147-50234202	-	Bladder	DRR013041	5	25	25	0	0	TJU_CMC_MD2.ID00699.3p-miR	Ago_13341
JHU_ID_25198	JHU_ID_25198.5p	hsa-miR-3198	hsa-miR-3198_MIMAT0015083_Homo_sapiens_miR-3198	5p	acuguucacccagcacuagcag	guggaguccuggggaauggaga	acuguucacccagcacuagcaguaccagaugguucuguggaguccuggggaauggaga	chr12:54231406-54231464	-	Breast adenocarcinoma	ERR227915	1	1	1	0	0
JHU_ID_25199	JHU_ID_25199.3p	hsa-miR-618	hsa-miR-618_MIMAT0003287_Homo_sapiens_miR-618	3p	ucaggagacaagcagguuuacc	caaacucuacuuguccuucugagu	caaacucuacuuguccuucugaguguaauuacguacaugcaguagcucaggagacaagcagguuuacc	chr12:80935751-80935819	-	Dendritic	SRR1708911	1	3	3	0	0	TJU_CMC_MD2.ID00725.3p-miR	Ago_13586
JHU_ID_25200	JHU_ID_25200.5p	hsa-miR-5693	hsa-miR-5693_MIMAT0022486_Homo_sapiens_miR-5693	5p	uuaguucauuucagucugugc	aguggcucugaaaugaacucaaacu	uuaguucauuucagucugugcugugagcuagccagcaguggcucugaaaugaacucaaacu	chr13:51348570-51348631	-	smc0529.fastq	SRR5127211	4	7	7	0	0		Ago_14200
JHU_ID_25201	JHU_ID_25201.3p	hsa-miR-3169	hsa-miR-3169_MIMAT0015044_Homo_sapiens_miR-3169	3p	ugugugccaagcauaguccugugu	auaggacugugcuuggcacauagc	auaggacugugcuuggcacauagcacaaagucuuaugguacugugugccaagcauaguccugugu	chr13:61199805-61199870	-	iPSC-CM	SRR1542718	1	1	1	0	0
JHU_ID_25202	JHU_ID_25202.3p	hsa-miR-4501	hsa-miR-4501_MIMAT0019037_Homo_sapiens_miR-4501	3p	uuucaucagaugucacauuuua	uuaugugaccucggaugaauca	uuaugugaccucggaugaaucacugaaauaugucugagcuucuguuucaucagaugucacauuuua	chr13:96427228-96427294	+	Islet Beta Cell	SRR873401	3	13	13	0	0
JHU_ID_25203	JHU_ID_25203.5p	hsa-miR-665	hsa-miR-665_MIMAT0004952_Homo_sapiens_miR-665	5p	aggggucucugccucuaccc	caggaggcugaggccccuca	aggggucucugccucuacccaggacucuuucaugaccaggaggcugaggccccuca	chr14:100875041-100875097	+	Chondrocyte	SRR5127229	15	57	57	0	0		Ago_14950
JHU_ID_25204	JHU_ID_25204.3p	hsa-miR-1193	hsa-miR-1193_MIMAT0015049_Homo_sapiens_miR-1193	3p	aggucacccguuugacuauccac	ggaugguagaccggugacgugc	ggaugguagaccggugacgugcacuucauuuacgauguaggucacccguuugacuauccac	chr14:101030062-101030123	+	BrainPrefrontalCortex	ERR409898	8	16	16	0	0		Ago_14954
JHU_ID_25205	JHU_ID_25205.3p	hsa-miR-4710	hsa-miR-4710_MIMAT0019815_Homo_sapiens_miR-4710	3p	ucucgccucuucgucagggaagg	ugucccagaccgaguggggugagggc	ugucccagaccgaguggggugagggcaggugguucuucccgaagcagcucucgccucuucgucagggaagg	chr14:104677685-104677756	-	Platelet	SRR1592245	6	7	7	0	0
JHU_ID_25206	JHU_ID_25206.5p	hsa-miR-4504	hsa-miR-4504_MIMAT0019040_Homo_sapiens_miR-4504	5p	agguucaucucuguugucauuu	gugacaauagagaugaacaugg	agguucaucucuguugucauuuguggcauggaccauuugugacaauagagaugaacaugg	chr14:50299869-50299929	-	BladderEpithelium	DRR013037	2	2	2	0	0
JHU_ID_25207	JHU_ID_25207.3p	hsa-miR-4706	hsa-miR-4706_MIMAT0019806_Homo_sapiens_miR-4706	3p	gagcagcccacuccuguccugggc	gcggggaggaagugggcgcugcu	gcggggaggaagugggcgcugcuucugcguuaucuggaaggagcagcccacuccuguccugggc	chr14:65044698-65044762	+	BrainPrefrontalCortex	ERR409898	10	19	19	0	0		Ago_14691
JHU_ID_25208	JHU_ID_25208.5p	hsa-miR-4310	hsa-miR-4310_MIMAT0016862_Homo_sapiens_miR-4310	5p	ucuggggccugaggcugcaga	ugcagcauucaugucccacccc	ucuggggccugaggcugcagaacauugcagcauucaugucccacccc	chr15:41866499-41866546	-	Lung	SRR1608285	1	1	1	0	0
JHU_ID_25209	JHU_ID_25209.3p	hsa-miR-7973	hsa-miR-7973_MIMAT0031176_Homo_sapiens_miR-7973	3p	aauuauucuagggucacacagc	ugugugacccuagaauaauuac	ugugugacccuagaauaauuacccaacgucucugagucucgguuuugagagggugaguaauuauucuagggucacacagc	chr15:51314032-51314112	+	Placenta	SRR567645	19	33	33	0	0	TJU_CMC_MD2.ID00995.5p-miR	Ago_15273
JHU_ID_25210	JHU_ID_25210.3p	hsa-miR-4511	hsa-miR-4511_MIMAT0019048_Homo_sapiens_miR-4511	3p	guaaaugcaauaguucuucuuu	agaagaacuguugcauuugccc	agaagaacuguugcauuugcccugcacucaguuugcacaggguaaaugcaauaguucuucuuu	chr15:65719256-65719319	-	smc0529.fastq	SRR5127211	1	5	5	0	0
JHU_ID_25211	JHU_ID_25211.5p	hsa-miR-4512	hsa-miR-4512_MIMAT0019049_Homo_sapiens_miR-4512	5p	cucagcccgggcaauauagugag	cacuguaucgcccaggcuggagu	cucagcccgggcaauauagugagaccucgucucuacaaaaaauugagacagggccucacuguaucgcccaggcuggagu	chr15:66496955-66497034	-	Placenta	SRR822454	1	1	1	0	0
JHU_ID_25212	JHU_ID_25212.3p	hsa-miR-1179	hsa-miR-1179_MIMAT0005824_Homo_sapiens_miR-1179	3p	caaccaauaagaggaugccau	agcauucuuucauugguuggu	agcauucuuucauugguugguguguauugccuugucaaccaauaagaggaugccau	chr15:88608122-88608178	+	Colon adenocarcinoma	SRR1917330	4	8	8	0	0
JHU_ID_25213	JHU_ID_25213.3p	hsa-miR-5094	hsa-miR-5094_MIMAT0021086_Homo_sapiens_miR-5094	3p	guagguacagugggcucacuga	agugaaugccuugaaccuaaca	agugaaugccuugaaccuaacacacugccuuuuaugugguagguacagugggcucacuga	chr15:89850647-89850707	-	Lung	SRR372618	8	34	34	0	0
JHU_ID_25214	JHU_ID_25214.3p	hsa-miR-3175	hsa-miR-3175_MIMAT0015052_Homo_sapiens_miR-3175	3p	cgggcgcuuucuccucccccua	gggcggggagagaacgcagugac	gggcggggagagaacgcagugacgucuggccgcgugcgcaugucgggcgcuuucuccucccccua	chr15:92904405-92904470	+	Breast adenocarcinoma	ERR227916	28	108	108	0	0		Ago_15655
JHU_ID_25215	JHU_ID_25215.5p	hsa-miR-3179	hsa-miR-3179_MIMAT0015056_Homo_sapiens_miR-3179	5p on -1	uuuaaauuacacuccuucugcu	uagaaggggugaaauuuaaacg	uuuaaauuacacuccuucugcugugccuuacagcaguagaaggggugaaauuuaaacg	chr16:14901522-14901580	+	Epithelium Bronchial	SRR5127216	59	265	265	0	0		Ago_15950
JHU_ID_25216	JHU_ID_25216.5p	hsa-miR-3179	hsa-miR-3179_MIMAT0015056_Homo_sapiens_miR-3179	5p on -2	guuuaaauuacacuccuucugcu	uagaaggggugaaauuuaaacgu	guuuaaauuacacuccuucugcugugccuuacagcaguagaaggggugaaauuuaaacgu	chr16:16300172-16300232	+	Blood	SRR2201546	59	265	265	0	0		Ago_15972
JHU_ID_25217	JHU_ID_25217.5p	hsa-miR-3179	hsa-miR-3179_MIMAT0015056_Homo_sapiens_miR-3179	5p on -3	guuuaaauuacacuccuucugcu	uagaaggggugaaauuuaaacgu	guuuaaauuacacuccuucugcugugccuuacagcaguagaaggggugaaauuuaaacgu	chr16:18411904-18411964	-	Blood	SRR2201546	58	263	263	0	0		Ago_15985
JHU_ID_25218	JHU_ID_25218.5p	hsa-miR-3179	hsa-miR-3179_MIMAT0015056_Homo_sapiens_miR-3179	5p on -3	guuuaaauuacacuccuucugcu	uagaaggggugaaauuuaaacgu	guuuaaauuacacuccuucugcugugccuuacagcaguagaaggggugaaauuuaaacgu	chr16:18494503-18494563	-	Blood	SRR2201546	58	263	263	0	0		Ago_15987
JHU_ID_25219	JHU_ID_25219.3p	hsa-miR-940	hsa-miR-940_MIMAT0004983_Homo_sapiens_miR-940	3p	aggaaggaaggcagggccccc	ggccugggcagccccgug	ggccugggcagccccguguguugaggaaggaaggcagggccccc	chr16:2271776-2271820	+	Bladder	DRR013044	7	13	13	0	0	TJU_CMC_MD2.ID01100.5p-miR	Ago_15809
JHU_ID_25220	JHU_ID_25220.3p	hsa-miR-4721	hsa-miR-4721_MIMAT0019835_Homo_sapiens_miR-4721	3p	ucaccgucauugcuugcucuccucc	gugagggcuccaggugacggugggc	gugagggcuccaggugacggugggcaggguugagccaagcucuccccagccuccagccaagcccagcucaccgucauugcuugcucuccucc	chr16:28843857-28843949	-	Epithelium Keratinocyte (Neonatal)	SRR5127208	34	167	167	0	0		Ago_16075
JHU_ID_25221	JHU_ID_25221.5p	hsa-miR-3176	hsa-miR-3176_MIMAT0015053_Homo_sapiens_miR-3176	5p	cccggcagccucgggccacacu	acuggccugggacuaccggggg	cccggcagccucgggccacacucccgggauccccagggacuggccugggacuaccggggg	chr16:543298-543358	+	Melanoma	SRR1913138	2	4	4	0	0	TJU_CMC_MD2.ID01072.5p-miR
JHU_ID_25222	JHU_ID_25222.3p	hsa-miR-1538	hsa-miR-1538_MIMAT0007400_Homo_sapiens_miR-1538	3p	cgggcugcugcuguuccugagc	cagggaacagcagcaacauggg	cagggaacagcagcaacaugggccucgcuuccugccggcgcggcccgggcugcugcuguuccugagc	chr16:69565803-69565870	-	Placenta	SRR822458	41	76	76	0	0	TJU_CMC_MD2.ID01177.5p-miR	Ago_16343
JHU_ID_25223	JHU_ID_25223.5p	hsa-miR-4719	hsa-miR-4719_MIMAT0019832_Homo_sapiens_miR-4719	5p	acuuguauguuauagauuugu	aaaucuauaauaugcagguca	acuuguauguuauagauuugugauuacauuaaaacuuaaaauuucacaaaucuauaauaugcagguca	chr16:76868945-76869013	+	Breast adenocarcinoma	ERR227917	1	1	1	0	0
JHU_ID_25224	JHU_ID_25224.3p	hsa-miR-3183	hsa-miR-3183_MIMAT0015063_Homo_sapiens_miR-3183	3p	cggcgccuccucgagggaggaga	ugccucucucggagucgcucgga	ugccucucucggagucgcucggagcagucacguugacggaauccuccggcgccuccucgagggaggaga	chr17:1022482-1022551	-	Epithelium Keratinocyte (Adult)	SRR5127203	3	4	4	0	0
JHU_ID_25225	JHU_ID_25225.3p	hsa-miR-451b	hsa-miR-451b_MIMAT0019840_Homo_sapiens_miR-451b	3p	augguaacgguuuccuugcca	gcaagagaaccauuaccauua	gcaagagaaccauuaccauuacuaaacucaguaaugguaacgguuuccuugcca	chr17:28861379-28861433	+	Plasma	SRR822451	2	4	4	0	0
JHU_ID_25226	JHU_ID_25226.3p	hsa-miR-4523	hsa-miR-4523_MIMAT0019061_Homo_sapiens_miR-4523	3p	ggccgaggcccgggccgguucc	accgagagggccucggcugu	accgagagggccucggcugugugaggacuagaggcggccgaggcccgggccgguucc	chr17:29390669-29390726	+	Dendritic	SRR1708922	1	4	2	0	0		Ago_17039
JHU_ID_25227	JHU_ID_25227.5p	hsa-miR-4734	hsa-miR-4734_MIMAT0019859_Homo_sapiens_miR-4734	5p	accgcgccggcccgcaccuccc	gagcugcgggcugcgguca	accgcgccggcccgcaccucccggcccggagcugcgggcugcgguca	chr17:38702274-38702321	-	Lung	SRR1216823	1	1	1	0	0		Ago_17137
JHU_ID_25228	JHU_ID_25228.5p	hsa-miR-2117	hsa-miR-2117_MIMAT0011162_Homo_sapiens_miR-2117	5p	acuucuguccggcauggugaacagc	uguucucuuugccaaggacagaucuga	acuucuguccggcauggugaacagcaggauuggcuguagcuguucucuuugccaaggacagaucuga	chr17:43444816-43444883	+	Smooth Muscle Cell Prostate	SRR5127222	12	44	44	0	0
JHU_ID_25229	JHU_ID_25229.3p	hsa-miR-4315	hsa-miR-4315_MIMAT0016866_Homo_sapiens_miR-4315	3p	ucuggugcagaacuacagc	uuucugagcuggacc	uuucugagcuggacccucucucuaccucuggugcagaacuacagc	chr17:45475376-45475421	-	Heart	ERR038427	1	1	1	0	0
JHU_ID_25230	JHU_ID_25230.3p	hsa-miR-4736	hsa-miR-4736_MIMAT0019862_Homo_sapiens_miR-4736	3p	uggcugcuugccugccug	ggcagguuaucugggcugccauc	ggcagguuaucugggcugccaucucccacuggcugcuugccugccug	chr17:58335974-58336021	-	BrainPrefrontalCortex	SRR1759220	1	1	1	0	0
JHU_ID_25231	JHU_ID_25231.5p	hsa-miR-4729	hsa-miR-4729_MIMAT0019851_Homo_sapiens_miR-4729	5p	uuuccucauuuaucuguuggga	ccagcagauaaaugaggaaaca	uuuccucauuuaucuguugggaagcuaacugugaccuuagcgucccagcagauaaaugaggaaaca	chr17:59366087-59366153	+	Retina	ERR973604	12	129	125	0	4	TJU_CMC_MD2.ID01368.3p-miR
JHU_ID_25232	JHU_ID_25232.3p	hsa-miR-4737	hsa-miR-4737_MIMAT0019863_Homo_sapiens_miR-4737	3p	aggaccgaggaugcugacggu	ugacagugccucacagccgca	ugacagugccucacagccgcacaggaccgaggaugcugacggu	chr17:60043041-60043084	-	BrainPrefrontalCortex	SRR1759217	2	2	2	0	0
JHU_ID_25233	JHU_ID_25233.3p	hsa-miR-4315	hsa-miR-4315_MIMAT0016866_Homo_sapiens_miR-4315	3p	ucuggugcagaacuacagc	uuucugagcuggacc	uuucugagcuggacccucucucuaccucuggugcagaacuacagc	chr17:64822043-64822088	-	Heart	ERR038427	1	1	1	0	0
JHU_ID_25234	JHU_ID_25234.5p	hsa-miR-3615	hsa-miR-3615_MIMAT0017994_Homo_sapiens_miR-3615	5p	agacgccgcgcggggcggggau	cucggcuccucgcggcucgcg	agacgccgcgcggggcggggauuggucugugguccucucucggcuccucgcggcucgcg	chr17:74748628-74748687	+	Plasma	SRR822443	7	17	17	0	0	TJU_CMC_MD2.ID01389.5p-miR	Ago_17640
JHU_ID_25235	JHU_ID_25235.5p	hsa-miR-636	hsa-miR-636_MIMAT0003306_Homo_sapiens_miR-636	5p	cgcugugcuugcucgucccgcccgc	gggcggggccggccccgcugccug	gggcggggccggccccgcugccuggaauuaaccccgcugugcuugcucgucccgcccgc	chr17:76736466-76736525	-	Red Blood Cell	SRR5127232	3	5	5	0	0		Ago_17701
JHU_ID_25236	JHU_ID_25236.3p	hsa-miR-4730	hsa-miR-4730_MIMAT0019852_Homo_sapiens_miR-4730	3p	gcuggugugugcugcuccacag	cuggcggagcccauuccaugcca	cuggcggagcccauuccaugccagaugcugagcgauggcuggugugugcugcuccacag	chr17:80419427-80419486	+	T cell leukemia	SRR1292461	4	6	6	0	0
JHU_ID_25237	JHU_ID_25237.3p	hsa-miR-4525	hsa-miR-4525_MIMAT0019064_Homo_sapiens_miR-4525	3p	aucagcgugcacuuccccacccug	gaggggggaugugcaugcugguug	gaggggggaugugcaugcugguuggggugggcugccuguggaccaaucagcgugcacuuccccacccug	chr17:82668234-82668303	-	Valve Interstitial Cell	SRR948076	174	1529	1525	4	0	TJU_CMC_MD2.ID01454.3p-miR	Ago_17909
JHU_ID_25238	JHU_ID_25238.5p	hsa-miR-5190	hsa-miR-5190_MIMAT0021121_Homo_sapiens_miR-5190	5p	gcuccagcccugucacaugguu	ccagugacugagcuggagcca	gcuccagcccugucacaugguuaauguuccacagccagugacugagcuggagcca	chr18:13459959-13460014	+	Astrocytes	SRR5127214	3	3	3	0	0
JHU_ID_25239	JHU_ID_25239.5p	hsa-miR-4526	hsa-miR-4526_MIMAT0019065_Homo_sapiens_miR-4526	5p	ggcccagucccugcugucaugc	cugacagcagggcuggccgc	ggcccagucccugcugucaugccccaggugacgugcugggcugacagcagggcuggccgc	chr18:13611128-13611188	+	Lung	SRR1216836	15	26	26	0	0	TJU_CMC_MD2.ID01480.5p-miR	Ago_18023
JHU_ID_25240	JHU_ID_25240.5p	hsa-miR-4528	hsa-miR-4528_MIMAT0019067_Homo_sapiens_miR-4528	5p	uacagaucuuuauauauaugau	cauuauauguaugaucuggaca	uacagaucuuuauauauaugaucauuauauguaugaugagaucauuauauguaugaucuggaca	chr18:53237115-53237179	+	Mesangial	SRR5127221	11	57	57	0	0
JHU_ID_25241	JHU_ID_25241.3p	hsa-miR-1181	hsa-miR-1181_MIMAT0005826_Homo_sapiens_miR-1181	3p	gccaaggcaagaugguggacuac	cugccgccgucgccgcca	cugccgccgucgccgccacccgagccggagcgggcugggccgccaaggcaagaugguggacuac	chr19:10403467-10403531	-	Colon adenocarcinoma	SRR1917331	1	2	2	0	0
JHU_ID_25242	JHU_ID_25242.3p	hsa-miR-4748	hsa-miR-4748_MIMAT0019884_Homo_sapiens_miR-4748	3p	cagacccuacccaaccccacg	ugagguuuggggaggauuugcu	ugagguuuggggaggauuugcuggugcuagagaggaaagcagacccuacccaaccccacg	chr19:10780262-10780322	+	BrainPrefrontalCortex	SRR1759212	3	4	4	0	0	TJU_CMC_MD2.ID01605.3p-miR	Ago_18664
JHU_ID_25243	JHU_ID_25243.3p	hsa-miR-5684	hsa-miR-5684_MIMAT0022473_Homo_sapiens_miR-5684	3p	cccaggcuggaguccaguguca	agcugaacucuagccugagcaa	agcugaacucuagccugagcaacagagugagauggucuuguuuuguugcccaggcuggaguccaguguca	chr19:12787127-12787197	+	Placenta	SRR822452	1	3	2	0	1		Ago_18718
JHU_ID_25244	JHU_ID_25244.5p	hsa-miR-5695	hsa-miR-5695_MIMAT0022488_Homo_sapiens_miR-5695	5p	agaaucuagacagauaggccuug	aggccuaucuaucuagauucu	aggccuaucuaucuagauucuucuuggccucucugagcaugcauuccugagacuccaagaagaaucuagacagauaggccuug	chr19:12920322-12920405	+	Plasma	SRR822438	13	47	46	0	1		Ago_18725
JHU_ID_25245	JHU_ID_25245.5p	hsa-miR-3188	hsa-miR-3188_MIMAT0015070_Homo_sapiens_miR-3188	5p	ccugguggggcuguguccggggg	uuugugcggauacggggcu	uuugugcggauacggggcuggaggccugguggggcuguguccggggg	chr19:18282135-18282182	+	B Cell_memory	SRR060986	65	793	783	9	1		Ago_18879
JHU_ID_25246	JHU_ID_25246.3p	hsa-miR-1270	hsa-miR-1270_MIMAT0005924_Homo_sapiens_miR-1270	3p	ggcuuuucuuuaucuucuaugu	acuggagauauggaagagcugu	acuggagauauggaagagcuguguuggguauaaguaacaggcuuuucuuuaucuucuaugu	chr19:20399282-20399343	-	Islet Beta Cell	SRR1028925	32	75	73	0	2		Ago_18925
JHU_ID_25247	JHU_ID_25247.5p	hsa-miR-8077	hsa-miR-8077_MIMAT0031004_Homo_sapiens_miR-8077	5p	agggggugggaugggcacuggg	ucugcccaacugacccccagg	agggggugggaugggcacugggaguccaaaggaaagggcugagugggguucugacuccucugcccaacugacccccagg	chr19:42351138-42351217	+	Retina	ERR973608	1	3	1	0	2		Ago_19200
JHU_ID_25248	JHU_ID_25248.3p	hsa-miR-643	hsa-miR-643_MIMAT0003313_Homo_sapiens_miR-643	3p	acacuuguaugcuagcucaggu	cugagcuagaauacaaguaguug	cugagcuagaauacaaguaguuggcgucuucagagacacuuguaugcuagcucaggu	chr19:52281820-52281877	+	Fat	SRR772343	18	45	44	0	1	TJU_CMC_MD2.ID01762.5p-miR	Ago_19423
JHU_ID_25249	JHU_ID_25249.3p	hsa-miR-498	hsa-miR-498_MIMAT0002824_Homo_sapiens_miR-498	3p	aaagcaccuccagagcuugaagcu	uuucaagccagggggcguuuuuc	uuucaagccagggggcguuuuucuauaacuggaugaaaagcaccuccagagcuugaagcu	chr19:53674230-53674290	+	H9 ESC	SRR1988288	8	770	770	0	0
JHU_ID_25250	JHU_ID_25250.5p	hsa-miR-520e	hsa-miR-520e_MIMAT0002825_Homo_sapiens_miR-520e	5p	cucaagauggaagcaguuucu	aaagugcuuccuuuuugaggg	cucaagauggaagcaguuucuguugucugaaaggaaagaaagugcuuccuuuuugaggg	chr19:53675726-53675785	+	Placenta	SRR567635	13	1088	1088	0	0
JHU_ID_25251	JHU_ID_25251.5p	hsa-miR-521	hsa-miR-521_MIMAT0002854_Homo_sapiens_miR-521	5p	ucuccaaagggaagaauuuucu	aacgcacuucccuuuagagugu	ucuccaaagggaagaauuuucucuugucuaaaagaaaagaacgcacuucccuuuagagugu	chr19:53716608-53716669	+	Placenta	SRR822459	1	164	164	0	0
JHU_ID_25252	JHU_ID_25252.3p	hsa-miR-527	hsa-miR-527_MIMAT0002862_Homo_sapiens_miR-527	3p	aagugcuucccuuuggugaauu	gacugcaaagggaagcccuuuc	gacugcaaagggaagcccuuucuguugucuaaaagaaaagaaagugcuucccuuuggugaauu	chr19:53754029-53754092	+	Plasma	SRR822439	1	1	1	0	0
JHU_ID_25253	JHU_ID_25253.3p	hsa-miR-4754	hsa-miR-4754_MIMAT0019894_Homo_sapiens_miR-4754	3p	guccagguugccgugcgcaug	cgcgccugaugcggaccuggguua	cgcgccugaugcggaccuggguuagcggagugaggcccaguggucaccgccgcccuccgcagguccagguugccgugcgcaug	chr19:58386774-58386857	-	Epithelium Retinal Pigment	SRR5127210	23	37	37	0	0	TJU_CMC_MD2.ID01782.3p-miR	Ago_19524
JHU_ID_25254	JHU_ID_25254.3p	hsa-miR-5696	hsa-miR-5696_MIMAT0022489_Homo_sapiens_miR-5696	3p	ucagacuaccuaaaugagcacu	agugcucauuuaaguagucuga	agugcucauuuaaguagucugaugccuacuacugaugacauacaauguaagugcucauuuaggcgucagacuaccuaaaugagcacu	chr2:101309449-101309536	+	Fat	SRR772354	87	330	323	3	4	TJU_CMC_MD2.ID01876.3p-miR	Ago_2896
JHU_ID_25255	JHU_ID_25255.3p	hsa-miR-4435	hsa-miR-4435_MIMAT0018951_Homo_sapiens_miR-4435	3p	ugcagugugacucagcaggccaaca	auggccagagcucacacagaggg	auggccagagcucacacagagggaugagugcacuucaccugcagugugacucagcaggccaaca	chr2:111321018-111321082	-	Hepatocellular carcinoma (HepG2)	ERR738403	10	26	26	0	0		Ago_2959
JHU_ID_25256	JHU_ID_25256.5p	hsa-miR-4771	hsa-miR-4771_MIMAT0019925_Homo_sapiens_miR-4771	5p on -2	cuaauuuuagaucuggucugcu	cagacuugaccuacaauuagcc	cuaauuuuagaucuggucugcuucaguuucacuccaagcagacuugaccuacaauuagcc	chr2:111771066-111771126	-	Lung	SRR1216823	85	565	565	0	0		Ago_2978
JHU_ID_25257	JHU_ID_25257.5p	hsa-miR-1302	hsa-miR-1302_MIMAT0005890_Homo_sapiens_miR-1302	5p on -3	guagcauaaauauuucccaagcu	uuugggacauacuuaugcuaaaa	guagcauaaauauuucccaagcuuaguuugggacauacuuaugcuaaaa	chr2:113583002-113583051	-	Lung	SRR1216774	1	1	1	0	0		Ago_3002
JHU_ID_25258	JHU_ID_25258.3p	hsa-miR-3125	hsa-miR-3125_MIMAT0014988_Homo_sapiens_miR-3125	3p	agauccccgccuuccuccucc	uagaggaagcuguggagagaa	uagaggaagcuguggagagaacucacggugccugugguucgagauccccgccuuccuccucc	chr2:12737376-12737438	+	Retina	ERR973607	1	2	2	0	0
JHU_ID_25259	JHU_ID_25259.3p	hsa-miR-1245a	hsa-miR-1245a_MIMAT0005897_Homo_sapiens_miR-1245a	3p	ccuacauauaaaaagguauuuuuau	aaaacuaccuauuuauguauaggcc	aaaacuaccuauuuauguauaggccuuuagaucaucugauguugaauacucuuuaagugaucuaaaggccuacauauaaaaagguauuuuuau	chr2:188978082-188978175	+	Skin	SRR2174509	2	5	5	0	0	TJU_CMC_MD2.ID01943.5p-miR
JHU_ID_25260	JHU_ID_25260.5p	hsa-miR-5702	hsa-miR-5702_MIMAT0022495_Homo_sapiens_miR-5702	5p	uccugggauauguugcugauccaa	gagucagcaacauaucccaugacu	uccugggauauguugcugauccaaccugaaauccuucuguagguugagucagcaacauaucccaugacu	chr2:226658716-226658785	-	Epithelium Keratinocyte (Adult)	SRR5127203	4	27	27	0	0
JHU_ID_25261	JHU_ID_25261.5p	hsa-miR-4765	hsa-miR-4765_MIMAT0019916_Homo_sapiens_miR-4765	5p	aacguagcuauccaccacuca	agugauugauagcuauguuca	aacguagcuauccaccacucagccuggaaaaagcugagugauugauagcuauguuca	chr2:32635266-32635323	+	Plasma	SRR822437	10	20	20	0	0	TJU_CMC_MD2.ID01812.5p-miR	Ago_2400
JHU_ID_25262	JHU_ID_25262.3p	hsa-miR-559	hsa-miR-559_MIMAT0003223_Homo_sapiens_miR-559	3p	gugcauauuuacuuuaggaugu	aucuuaaaguaaauaugcacca	aucuuaaaguaaauaugcaccaaaauuacuuuugguaaauacaguuuuggugcauauuuacuuuaggaugu	chr2:47377686-47377757	+	Colon adenocarcinoma	SRR1917335	4	9	9	0	0	TJU_CMC_MD2.ID01828.3p-miR
JHU_ID_25263	JHU_ID_25263.3p	hsa-miR-4431	hsa-miR-4431_MIMAT0018947_Homo_sapiens_miR-4431	3p	cuuucuaguugucagagucauu	cgacucugaaaacuagaagguu	cgacucugaaaacuagaagguuuaugacugggcauuucucacccaaugcccaauauugaacuuucuaguugucagagucauu	chr2:52702526-52702608	-	Epithelium Keratinocyte (Adult)	SRR5127203	1	1	1	0	0
JHU_ID_25264	JHU_ID_25264.5p	hsa-miR-5192	hsa-miR-5192_MIMAT0021123_Homo_sapiens_miR-5192	5p	ucaccuggaaccauuucuccu	gagaguggauuccagguggug	ucaccuggaaccauuucuccugggaagcaugguagccaggagaguggauuccagguggug	chr2:62205845-62205905	+	Blood	SRR2201550	4	4	4	0	0
JHU_ID_25265	JHU_ID_25265.3p	hsa-miR-4434	hsa-miR-4434_MIMAT0018950_Homo_sapiens_miR-4434	3p	caacuuuuccuacaguguaagu	ucucacuuuaggagaaguaaagua	ucucacuuuaggagaaguaaaguagaacuuugguuuucaacuuuuccuacaguguaagu	chr2:64525511-64525570	+	Dendritic	SRR1708909	4	10	10	0	0
JHU_ID_25266	JHU_ID_25266.5p	hsa-miR-4779	hsa-miR-4779_MIMAT0019938_Homo_sapiens_miR-4779	5p	uuuacuguucccuccuagag	cuaggagggaauaguaaaag	uuuacuguucccuccuagaguccauucuuuacucuaggagggaauaguaaaag	chr2:86193039-86193092	-	Red Blood Cell	SRR5127232	1	3	3	0	0
JHU_ID_25267	JHU_ID_25267.5p	hsa-miR-4771	hsa-miR-4771_MIMAT0019925_Homo_sapiens_miR-4771	5p	cuaauuuuagaucuggucugcu	cagacuugaccuacaauuagcc	cuaauuuuagaucuggucugcuucaguuucacuccaagcagacuugaccuacaauuagcc	chr2:87194794-87194854	+	Lung	SRR1216823	85	565	565	0	0		Ago_2763
JHU_ID_25268	JHU_ID_25268.3p	hsa-miR-4435	hsa-miR-4435_MIMAT0018951_Homo_sapiens_miR-4435	3p	ugcagugugacucagcaggccaaca	auggccagagcucacacagaggg	auggccagagcucacacagagggaugagugcacuucaccugcagugugacucagcaggccaaca	chr2:87629764-87629828	+	Hepatocellular carcinoma (HepG2)	ERR738403	10	26	26	0	0		Ago_2784
JHU_ID_25269	JHU_ID_25269.3p	hsa-miR-663a	hsa-miR-663a_MIMAT0003326_Homo_sapiens_miR-663a	3p	cggugggaucccgcggcc	ccgcgggaccgcc	ccgcgggaccgcccucgugucuguggcggugggaucccgcggcc	chr20:26208210-26208254	-	Retina	ERR973616	1	11	5	0	0		Ago_19709
JHU_ID_25270	JHU_ID_25270.5p	hsa-miR-4477b	hsa-miR-4477b_MIMAT0019005_Homo_sapiens_miR-4477b	5p	acaaauguccuuaauagcaauccu	aaaugccauuaaggacauuuguga	acaaauguccuuaauagcaauccuuaaaugccauuaaggacauuuguga	chr20:29880401-29880450	+	Placenta	SRR822459	2	2	2	0	0		Ago_19721
JHU_ID_25271	JHU_ID_25271.5p	hsa-miR-1289	hsa-miR-1289_MIMAT0005879_Homo_sapiens_miR-1289	5p	uaaaugcagacucuugguuucc	aguccaggaaucugcauuuuag	uaaaugcagacucuugguuuccacccccagagaaucccuaaaccggggguggaguccaggaaucugcauuuuag	chr20:35453987-35454061	-	Valve Interstitial Cell	SRR948075	38	197	197	0	0		Ago_19803
JHU_ID_25272	JHU_ID_25272.3p	hsa-miR-298	hsa-miR-298_MIMAT0004901_Homo_sapiens_miR-298	3p	ugaggaacuagccugcugcuuugcu	cagaagcagggagguucucccag	cagaagcagggagguucucccagugguuuuccuugacugugaggaacuagccugcugcuuugcu	chr20:58818237-58818301	-	Epithelium Retinal Pigment	SRR5127210	16	59	59	0	0		Ago_20026
JHU_ID_25273	JHU_ID_25273.3p	hsa-miR-4533	hsa-miR-4533_MIMAT0019072_Homo_sapiens_miR-4533	3p	agcguccacuucccuuucucu	uggaaggagguugccggacgcugc	uggaaggagguugccggacgcugcuggcugccuuccagcguccacuucccuuucucu	chr20:60478119-60478176	+	Platelet	SRR1592246	1	1	1	0	0
JHU_ID_25274	JHU_ID_25274.3p	hsa-miR-548ag	hsa-miR-548ag_MIMAT0018969_Homo_sapiens_miR-548ag	3p on -2	aagaaccucaauuaccuuugcag	gcaaagguaauugugguuucugc	gcaaagguaauugugguuucugccauugaaaguaaaggcaagaaccucaauuaccuuugcag	chr20:60564563-60564625	+	Plasma	SRR822445	126	2771	2771	0	0		Ago_20044
JHU_ID_25275	JHU_ID_25275.3p	hsa-miR-4326	hsa-miR-4326_MIMAT0016888_Homo_sapiens_miR-4326	3p	ggucgggggccaggggacaggaag	ugcuguuccucugucucccagacucug	ugcuguuccucugucucccagacucuggguggauggagcaggucgggggccaggggacaggaag	chr20:63286815-63286879	+	Macrophage	SRR1532975	53	336	336	0	0		Ago_20110
JHU_ID_25276	JHU_ID_25276.3p	hsa-miR-3197	hsa-miR-3197_MIMAT0015082_Homo_sapiens_miR-3197	3p	uucccgauccaccgcucucc	ggaggcgcaggcucggaaagg	ggaggcgcaggcucggaaaggcgcgcgaggcuccaggcuccuucccgauccaccgcucucc	chr21:41167564-41167625	+	BrainPrefrontalCortex	SRR1759213	6	37	37	0	0		Ago_20478
JHU_ID_25277	JHU_ID_25277.3p	hsa-miR-3648	hsa-miR-3648_MIMAT0018068_Homo_sapiens_miR-3648	3p	ccgggugccgcgcggugccg	gugguggggggagccgcgggg	gugguggggggagccgcggggaucgccgagggccggucggccgccccgggugccgcgcggugccg	chr21:8208489-8208554	+	Lung	SRR1608283	45	415	374	4	37
JHU_ID_25278	JHU_ID_25278.5p	hsa-miR-3687	hsa-miR-3687_MIMAT0018115_Homo_sapiens_miR-3687	5p	cccguucggcgcgcgcgugcgc	guguggcgugggucgacc	cccguucggcgcgcgcgugcgcccgagcgcggcccgguggucccucccggacaggcguucgugcgacguguggcgugggucgacc	chr21:8208833-8208918	+	H9 ESC	SRR1988290	15	265	148	114	3
JHU_ID_25279	JHU_ID_25279.3p	hsa-miR-663a	hsa-miR-663a_MIMAT0003326_Homo_sapiens_miR-663a	3p	ggugggaucccgcggccg	gccgcgggaccgc	gccgcgggaccgcccucgugucuguggcggugggaucccgcggccg	chr21:8252255-8252301	+	Retina	ERR973606	1	2	2	0	0		Ago_20221
JHU_ID_25280	JHU_ID_25280.5p	hsa-miR-3687	hsa-miR-3687_MIMAT0018115_Homo_sapiens_miR-3687	5p	cccguucggcgcgcgcgugcgc	guucgugcgacguguggcgugggu	cccguucggcgcgcgcgugcgccgagcgcggcccgguggucccucccggacaggcguucgugcgacguguggcgugggu	chr21:8253039-8253118	+	Lung	SRR1216774	11	90	85	5	0
JHU_ID_25281	JHU_ID_25281.3p	hsa-miR-3648	hsa-miR-3648_MIMAT0018068_Homo_sapiens_miR-3648	3p	ccgggugccgcgcggugccg	gugguggggggagccgcgggg	gugguggggggagccgcggggaucgccgagggccggucggccgccccgggugccgcgcggugccg	chr21:8391536-8391601	+	Lung	SRR1608283	46	416	375	4	37		Ago_20248
JHU_ID_25282	JHU_ID_25282.3p	hsa-miR-3687	hsa-miR-3687_MIMAT0018115_Homo_sapiens_miR-3687	3p	gcguucgugcgacguguggcgug	cgucgcccguucggcgcgcgcgu	cgucgcccguucggcgcgcgcgugcccgagccggcccgguggucccucccggacaggcguucgugcgacguguggcgug	chr21:8391870-8391949	+	Myoblast Skeletal Muscle	SRR1055962	16	58	57	1	0		Ago_20249
JHU_ID_25283	JHU_ID_25283.3p	hsa-miR-3648	hsa-miR-3648_MIMAT0018068_Homo_sapiens_miR-3648	3p	ccgggugccgcgcggugccg	gugguggggggagccgcgggg	gugguggggggagccgcggggaucgccgagggccggucggccgccccgggugccgcgcggugccg	chr21:8987015-8987080	+	Lung	SRR1608283	42	408	366	4	38
JHU_ID_25284	JHU_ID_25284.3p	hsa-miR-3687	hsa-miR-3687_MIMAT0018115_Homo_sapiens_miR-3687	3p	uucgugcgacguguggcgug	cgcgcgcgugcgcccgagcg	cgcgcgcgugcgcccgagcgcggcccgguggucccucccggacaggcguucgugcgacguguggcgug	chr21:8987368-8987436	+	BladderEpithelium	DRR013038	18	284	165	116	3	TJU_CMC_MD2.ID02124.5p-miR
JHU_ID_25285	JHU_ID_25285.5p	hsa-miR-3198	hsa-miR-3198_MIMAT0015083_Homo_sapiens_miR-3198	5p	acuguucacccagcacuagcag	guggaguccuggggaauggaga	acuguucacccagcacuagcaguaccagacgguucuguggaguccuggggaauggaga	chr22:17764189-17764247	-	Breast adenocarcinoma	ERR227915	1	1	1	0	0
JHU_ID_25286	JHU_ID_25286.5p	hsa-miR-1286	hsa-miR-1286_MIMAT0005877_Homo_sapiens_miR-1286	5p	gacucagcuugcucuggcug	gcaggaccaagaugagcccu	gacucagcuugcucuggcugcuggauugaauuagcugcaggaccaagaugagcccu	chr22:20249144-20249200	-	BrainPrefrontalCortex	ERR409896	18	105	105	0	0		Ago_20682
JHU_ID_25287	JHU_ID_25287.3p	hsa-miR-3199	hsa-miR-3199_MIMAT0015084_Homo_sapiens_miR-3199	3p	uaaggcagucccugggagucacu	ugacuccagggacugccuuagg	ugacuccagggacugccuuaggagaaaguuucuggaaguucugacauuccagaaacuuucuccuaaggcagucccugggagucacu	chr22:27920524-27920610	-	BladderEpithelium	DRR013038	34	74	73	0	1		Ago_20792
JHU_ID_25288	JHU_ID_25288.3p	hsa-miR-3909	hsa-miR-3909_MIMAT0018183_Homo_sapiens_miR-3909	3p	cuuguccucuagggccugcagu	agcaggcuccgggggacaggga	agcaggcuccgggggacagggaaaagcacacaaggaacuuguccucuagggccugcagu	chr22:35335671-35335730	+	Fat	SRR772345	185	2440	2434	5	1	TJU_CMC_MD2.ID02207.5p-miR	Ago_20879
JHU_ID_25289	JHU_ID_25289.3p	hsa-miR-567	hsa-miR-567_MIMAT0003231_Homo_sapiens_miR-567	3p	uguacuggaagaacaugcaaaac	acaguauguucuuccaggacaga	acaguauguucuuccaggacagaacauucuuugcuauuuuguacuggaagaacaugcaaaac	chr3:112112814-112112876	+	Tongue squamous carcinoma	SRR1810082	1	3	3	0	0
JHU_ID_25290	JHU_ID_25290.5p	hsa-miR-544b	hsa-miR-544b_MIMAT0015004_Homo_sapiens_miR-544b	5p	aaaaugcagaauccauuucug	gaccugagguugugcauuucuaa	aaaaugcagaauccauuucuguagcucugagacuagaccugagguugugcauuucuaa	chr3:124732450-124732508	+	Epithelium Retinal Pigment	SRR5127210	4	702	702	0	0	TJU_CMC_MD2.ID02380.5p-miR
JHU_ID_25291	JHU_ID_25291.5p	hsa-miR-5092	hsa-miR-5092_MIMAT0021084_Homo_sapiens_miR-5092	5p	ugccaaagccaguggggacu	uccacgcugagcuuggcauc	ugccaaagccaguggggacuggacaacaugaugagcccaaaccaauccacgcugagcuuggcauc	chr3:125151474-125151539	-	Islet Alpha Cell	SRR1028924	1	2	2	0	0	TJU_CMC_MD2.ID02384.5p-miR	Ago_4488
JHU_ID_25292	JHU_ID_25292.3p	hsa-miR-7976	hsa-miR-7976_MIMAT0031179_Homo_sapiens_miR-7976	3p	aucaaaagccucagggcagauu	ucugcccugagacuuuugcucu	ucugcccugagacuuuugcucuaauaauuuauucuaauaauaauuuagaucaaaagccucagggcagauu	chr3:127587108-127587178	-	Nasopharyngeal carcinoma	SRR1564521	35	114	114	0	0	TJU_CMC_MD2.ID02389.3p-miR	Ago_4513
JHU_ID_25293	JHU_ID_25293.5p	hsa-miR-563	hsa-miR-563_MIMAT0003227_Homo_sapiens_miR-563	5p	aaauguguguugcucugaugu	auuagguugacauacguuucc	aaauguguguugcucugauguaauuagguugacauacguuucc	chr3:15873797-15873840	+	BrainPrefrontalCortex	SRR1759214	1	2	2	0	0
JHU_ID_25294	JHU_ID_25294.3p	hsa-miR-1263	hsa-miR-1263_MIMAT0005915_Homo_sapiens_miR-1263	3p	ucaguaugccauguugccauau	augguacccuggcauacugagu	augguacccuggcauacugaguauuuuaauacuggcauacucaguaugccauguugccauau	chr3:164171482-164171544	-	H9 Differentiated Mesenchymal	SRR1988295	1	2	2	0	0	TJU_CMC_MD2.ID02427.3p-miR
JHU_ID_25295	JHU_ID_25295.3p	hsa-miR-3714	hsa-miR-3714_MIMAT0018165_Homo_sapiens_miR-3714	3p	ccgggcagggaagacaccgcugc	agcagugcuccccugugacgug	agcagugcuccccugugacgugcuccaucaccgggcagggaagacaccgcugc	chr3:16933202-16933255	+	Lung	SRR372640	1	2	2	0	0
JHU_ID_25296	JHU_ID_25296.5p	hsa-miR-944	hsa-miR-944_MIMAT0004987_Homo_sapiens_miR-944	5p	caucugauauacaauauuuucu	aaauuauuguacaucggaugag	caucugauauacaauauuuucuuaaauuguauaaagagaaauuauuguacaucggaugag	chr3:189829937-189829997	+	Skeletal	SRR1820680	21	796	796	0	0	TJU_CMC_MD2.ID02438.5p-miR	Ago_4857
JHU_ID_25297	JHU_ID_25297.5p	hsa-miR-5193	hsa-miR-5193_MIMAT0021124_Homo_sapiens_miR-5193	5p	aacugggauggggguuggggggagg	uccuccucuaccucaucccaguucc	aacugggauggggguuggggggagguaagaagucucugacuccuccucuaccucaucccaguucc	chr3:49806161-49806226	-	Myoblast Skeletal Muscle	SRR1200834	4	14	14	0	0	TJU_CMC_MD2.ID02328.5p-miR
JHU_ID_25298	JHU_ID_25298.3p	hsa-miR-1284	hsa-miR-1284_MIMAT0005941_Homo_sapiens_miR-1284	3p	aaagcccauguuuguauuggaa	ucuauacagacccuggcuuuuc	ucuauacagacccuggcuuuucuuaaauuuuauauauuggaaagcccauguuuguauuggaa	chr3:71541998-71542060	-	Dendritic	SRR1708922	34	159	159	0	0	TJU_CMC_MD2.ID02354.3p-miR	Ago_4306
JHU_ID_25299	JHU_ID_25299.5p	hsa-miR-3921	hsa-miR-3921_MIMAT0018196_Homo_sapiens_miR-3921	5p	aaggcauaugguacucaagaga	ucugaguaccauaugccuugu	aaggcauaugguacucaagagacuuagaaaucccuaagucucugaguaccauaugccuugu	chr3:99964324-99964385	-	Bladderepithelium	DRR013035	3	6	6	0	0
JHU_ID_25300	JHU_ID_25300.5p	hsa-miR-3138	hsa-miR-3138_MIMAT0015006_Homo_sapiens_miR-3138	5p	cacuucccccaccucacugcc	cagugagguagagggagugcc	cacuucccccaccucacugcccgggugcccacaagacuguggacagugagguagagggagugcc	chr4:10078618-10078682	-	Astrocytes	SRR5127214	164	1114	1113	1	0	TJU_CMC_MD2.ID02490.5p-miR	Ago_5075
JHU_ID_25301	JHU_ID_25301.3p	hsa-miR-577	hsa-miR-577_MIMAT0003242_Homo_sapiens_miR-577	3p	guuucaauacuuuaucugcucu	aguagauaaaauauugguaccu	aguagauaaaauauugguaccugaugaaucugaggccagguuucaauacuuuaucugcucu	chr4:114656772-114656833	+	BrainPrefrontalCortex	ERR409879	8	106	106	0	0	TJU_CMC_MD2.ID02560.3p-miR	Ago_5506
JHU_ID_25302	JHU_ID_25302.5p	hsa-miR-5091	hsa-miR-5091_MIMAT0021083_Homo_sapiens_miR-5091	5p	acuguggcgacggagacgacaaga	cuggagucccuggagguuagggcuu	acuguggcgacggagacgacaagacugugcuggucgcggguugugggguuuaggucaccggcaggggucuggagucccuggagguuagggcuu	chr4:13627866-13627959	+	Retina	ERR973618	8	13	13	0	0
JHU_ID_25303	JHU_ID_25303.3p	hsa-miR-3139	hsa-miR-3139_MIMAT0015007_Homo_sapiens_miR-3139	3p	cagguaucgcaggagcuuuuguu	uaggagcucaacagaugccuguu	uaggagcucaacagaugccuguugacugaauaauaaacagguaucgcaggagcuuuuguu	chr4:143343469-143343529	+	BrainPrefrontalCortex	ERR409882	4	8	8	0	0
JHU_ID_25304	JHU_ID_25304.5p	hsa-miR-578	hsa-miR-578_MIMAT0003243_Homo_sapiens_miR-578	5p	uacaaucccggacaacaagaagc	uucuugugcucuaggauuguauu	uacaaucccggacaacaagaagcuccuauagcuccuguagcuucuugugcucuaggauuguauu	chr4:165386262-165386326	+	Smooth Muscle Cell Aorta	SRR5127217	50	1289	1289	0	0		Ago_5652
JHU_ID_25305	JHU_ID_25305.5p	hsa-miR-1305	hsa-miR-1305_MIMAT0005893_Homo_sapiens_miR-1305	5p	cuguuucuaccauuaguuuu	cucuaaugggagagacagca	cuguuucuaccauuaguuuugaauguuuauuguaaagauacuuuucaacucuaaugggagagacagca	chr4:182169302-182169370	+	Lung	SRR1608282	94	1092	1092	0	0		Ago_5692
JHU_ID_25306	JHU_ID_25306.3p	hsa-miR-3945	hsa-miR-3945_MIMAT0018361_Homo_sapiens_miR-3945	3p	uacagccucuuaugcuuuccaaag	ggggagggcauaggagaggguugauaua	ggggagggcauaggagaggguugauauaaaaugcaauuacagccucuuaugcuuuccaaag	chr4:184851031-184851092	-	Lung	SRR372626	50	213	213	0	0	TJU_CMC_MD2.ID02587.3p-miR	Ago_5715
JHU_ID_25307	JHU_ID_25307.5p	hsa-miR-943	hsa-miR-943_MIMAT0004986_Homo_sapiens_miR-943	5p	gugggggacguuugccggucacugc	gcccugacuguugccguccuccagccc	gugggggacguuugccggucacugcugcuggcgcccugacuguugccguccuccagccc	chr4:1986399-1986458	-	Neuron iPSC	SRR1777166	1	2	2	0	0
JHU_ID_25308	JHU_ID_25308.3p	hsa-miR-7978	hsa-miR-7978_MIMAT0031181_Homo_sapiens_miR-7978	3p	aacaacaguauacaccaaauaga	uaucugguguauagcguugcuca	uaucugguguauagcguugcucaaguccucuauuucuuugaacaacaguauacaccaaauaga	chr4:21464697-21464760	-	Lung	SRR1216836	18	50	50	0	0	TJU_CMC_MD2.ID02497.3p-miR	Ago_5137
JHU_ID_25309	JHU_ID_25309.5p	hsa-miR-4801	hsa-miR-4801_MIMAT0019980_Homo_sapiens_miR-4801	5p	uugguuuucuuauguguaaaaugu	acuuuacacaagaaaaccaagg	uugguuuucuuauguguaaaauguaauaacauuucuuauguuuaaaacacuuuacacaagaaaaccaagg	chr4:37241914-37241984	-	BrainPrefrontalCortex	ERR409893	1	2	2	0	0
JHU_ID_25310	JHU_ID_25310.5p	hsa-miR-4449	hsa-miR-4449_MIMAT0018968_Homo_sapiens_miR-4449	5p	guagagcagcccucggcggcccgg	gggcugcgcgaggcacaggcgccgcgc	guagagcagcccucggcggcccggggggcgggcggcggugcccgucccggggcugcgcgaggcacaggcgccgcgc	chr4:52712678-52712754	+	BrainPrefrontalCortex	SRR1759214	1	1	1	0	0
JHU_ID_25311	JHU_ID_25311.5p	hsa-miR-1269a	hsa-miR-1269a_MIMAT0005923_Homo_sapiens_miR-1269a	5p	caguuggcauggcucagucca	gacugagccgugcuacuggc	caguuggcauggcucaguccaagucugaccaccugaggaaugccuggacugagccgugcuacuggc	chr4:66276847-66276913	+	Hepatocellular carcinoma (HepG2)	ERR738416	42	714	709	5	0	TJU_CMC_MD2.ID02525.5p-miR	Ago_5298
JHU_ID_25312	JHU_ID_25312.5p	hsa-miR-4452	hsa-miR-4452_MIMAT0018974_Homo_sapiens_miR-4452	5p	ugaggccaagagugcaaggcugu	agccuugaauucuuggccuuaag	ugaggccaagagugcaaggcuguagugugcacagccuugaauucuuggccuuaag	chr4:86542488-86542543	-	Islet Beta Cell	SRR873401	46	138	137	0	1		Ago_5389
JHU_ID_25313	JHU_ID_25313.5p	hsa-miR-3936	hsa-miR-3936_MIMAT0018351_Homo_sapiens_miR-3936	5p	agugucugcuguagaucccuca	agggguguauggcagaugcacc	agugucugcuguagaucccucaaauccguguuuggacgcuucugguaagggguguauggcagaugcacc	chr5:132365510-132365579	-	Epithelium Colonic Epithelium (flow)	SRR5127219	3	4	4	0	0
JHU_ID_25314	JHU_ID_25314.3p	hsa-miR-4461	hsa-miR-4461_MIMAT0018983_Homo_sapiens_miR-4461	5p	uggagauugagacuaguagggc	uuauguacguagucuaggccaua	uuauguacguagucuaggccauacguguuggagauugagacuaguagggc	chr5:134928052-134928102	+	Kidney	SRR553575	18	52	52	0	0
JHU_ID_25315	JHU_ID_25315.3p	hsa-miR-3655	hsa-miR-3655_MIMAT0018075_Homo_sapiens_miR-3655	3p	augccggagcgagauaguaa	gcuugucgcugcgguguug	gcuugucgcugcgguguugcuguuggagacucgauuguuggugacagcgaaagaacgauaacaaaaugccggagcgagauaguaa	chr5:140647844-140647929	+	Fat	SRR772370	1	1	1	0	0
JHU_ID_25316	JHU_ID_25316.3p	hsa-miR-1294	hsa-miR-1294_MIMAT0005884_Homo_sapiens_miR-1294	3p	caacagugccaaccucacaggacu	uccugugagguuggcauuguuguc	uccugugagguuggcauuguugucuggcauugucugauauacaacagugccaaccucacaggacu	chr5:154347150-154347215	+	Astrocytes	SRR5127214	12	60	58	0	2	TJU_CMC_MD2.ID02720.3p-miR	Ago_6537
JHU_ID_25317	JHU_ID_25317.3p	hsa-miR-1303	hsa-miR-1303_MIMAT0005891_Homo_sapiens_miR-1303	3p	auuuuagagacggggucuugcuc	agcgagaccucaacucuacaauu	agcgagaccucaacucuacaauuuuuuuuuuuuuaaauuuuagagacggggucuugcuc	chr5:154685789-154685848	+	smc0529.fastq	SRR5127211	102	2467	2449	2	16	TJU_CMC_MD2.ID02721.5p-miR	Ago_6544
JHU_ID_25318	JHU_ID_25318.3p	hsa-miR-581	hsa-miR-581_MIMAT0003246_Homo_sapiens_miR-581	3p	gugaucuaaagaacacaaagaa	cuuguguucucuagaucagug	cuuguguucucuagaucagugcuuuuagaaaauuugugugaucuaaagaacacaaagaa	chr5:53951524-53951583	-	T cell leukemia	SRR1292458	2	10	10	0	0		Ago_5993
JHU_ID_25319	JHU_ID_25319.5p	hsa-miR-5687	hsa-miR-5687_MIMAT0022478_Homo_sapiens_miR-5687	5p	cugacucugaaaucuucuaaa	uagaacguuuuagggucaaau	cugacucugaaaucuucuaaaugguacccacuuuauuuagaacguuuuagggucaaau	chr5:55508858-55508916	-	Astrocytes	SRR5127214	52	320	320	0	0		Ago_6006
JHU_ID_25320	JHU_ID_25320.3p	hsa-miR-4636	hsa-miR-4636_MIMAT0019693_Homo_sapiens_miR-4636	3p	aaaggcuucaagcacgaguucu	aacucguguucaaagccuuuag	aacucguguucaaagccuuuagcccagcaaugggagagugcuaaaggcuucaagcacgaguucu	chr5:9053822-9053886	-	Epithelium Keratinocyte (Adult)	SRR5127203	9	19	19	0	0	TJU_CMC_MD2.ID02605.3p-miR	Ago_5816
JHU_ID_25321	JHU_ID_25321.3p	hsa-miR-588	hsa-miR-588_MIMAT0003255_Homo_sapiens_miR-588	3p	uucuuacccaccauggccaaaau	uuggccacaauggguuagaaca	uuggccacaauggguuagaacacuauuccauuguguucuuacccaccauggccaaaau	chr6:126484646-126484704	+	Endothelial Aortic	SRR5139121	19	91	91	0	0		Ago_7538
JHU_ID_25322	JHU_ID_25322.3p	hsa-miR-3668	hsa-miR-3668_MIMAT0018091_Homo_sapiens_miR-3668	3p	uaguuuugaucaaucucugcaa	guagagauugaucaaaauaguu	guagagauugaucaaaauaguuucuaucaaaauaguuuugaucaaucucugcaa	chr6:140205263-140205317	+	Lung	SRR1608281	1	1	1	0	0
JHU_ID_25323	JHU_ID_25323.3p	hsa-miR-3918	hsa-miR-3918_MIMAT0018192_Homo_sapiens_miR-3918	3p	ucuccagcugggacccugcaccu	ggacagggccgcagauggagacu	ggacagggccgcagauggagacugcucaaggucaaaggggucuccagcugggacccugcaccu	chr6:158764674-158764737	-	H9 Differentiated Mesenchymal	SRR1988296	22	62	62	0	0		Ago_7715
JHU_ID_25324	JHU_ID_25324.5p	hsa-miR-1913	hsa-miR-1913_MIMAT0007888_Homo_sapiens_miR-1913	5p	ccggcagaggaggcugcagag	cugcccccuccgcugcugcca	ccggcagaggaggcugcagaggcuggcuuuccaaaacucugcccccuccgcugcugcca	chr6:166509363-166509422	-	Fibroblast Dermal (neonatal)	SRR5127225	36	144	144	0	0		Ago_7773
JHU_ID_25325	JHU_ID_25325.3p	hsa-miR-3939	hsa-miR-3939_MIMAT0018355_Homo_sapiens_miR-3939	3p	ccacaggauguccacacuggcu	ccucuguguguuccuguaugu	ccucuguguguuccuguaugugggcgugcacguaccugucacauguguacgcgcagaccacaggauguccacacuggcu	chr6:166997819-166997898	-	H9 Differentiated Mesenchymal	SRR1988295	45	550	550	0	0	TJU_CMC_MD2.ID02926.5p-miR	Ago_7785
JHU_ID_25326	JHU_ID_25326.5p	hsa-miR-4644	hsa-miR-4644_MIMAT0019704_Homo_sapiens_miR-4644	5p	ucugccucuuucuccauccacc	uggagagagaaaagagacagaagg	ucugccucuuucuccauccacccugguccagguccacagcaguggagagagaaaagagacagaagg	chr6:170330771-170330837	+	Hepatocellular carcinoma (HepG2)	ERR738416	5	7	7	0	0		Ago_7803
JHU_ID_25327	JHU_ID_25327.3p	hsa-miR-3143	hsa-miR-3143_MIMAT0015012_Homo_sapiens_miR-3143	3p	caacucuuuacaauguuucuaa	cuagauaacauuguaaagcgcuucu	cuagauaacauuguaaagcgcuucuuucgcgguugggcuggagcaacucuuuacaauguuucuaa	chr6:27147625-27147690	+	Colon adenocarcinoma	SRR1917329	61	422	418	0	4	TJU_CMC_MD2.ID02796.3p-miR	Ago_6953
JHU_ID_25328	JHU_ID_25328.3p	hsa-miR-4647	hsa-miR-4647_MIMAT0019709_Homo_sapiens_miR-4647	3p	cugcccagcaccaccaccucc	agauggugcugugcugaggaaaggg	agauggugcugugcugaggaaaggggaugcagagcccugcccagcaccaccaccucc	chr6:44254216-44254273	-	Lung	SRR372618	29	57	57	0	0		Ago_7241
JHU_ID_25329	JHU_ID_25329.3p	hsa-miR-5685	hsa-miR-5685_MIMAT0022475_Homo_sapiens_miR-5685	3p	agggcugugauguagagucugc	aggcucuacaucacagcccagc	aggcucuacaucacagcccagcaguuaucacgggccccuccccucaaugggcccgugauaacugcagggcugugauguagagucugc	chr6:53276990-53277077	+	Lung	SRR1216774	4	7	7	0	0	TJU_CMC_MD2.ID02849.5p-miR
JHU_ID_25330	JHU_ID_25330.5p	hsa-miR-548u	hsa-miR-548u_MIMAT0015013_Homo_sapiens_miR-548u	5p	caaaaguaaugugguuuuuuuc	caaagacugcaauuacuuuugcg	caaaaguaaugugguuuuuuucuuuacuuuuaauggcaaagacugcaauuacuuuugcg	chr6:57390144-57390203	+	Lung	SRR372642	1	2	2	0	0
JHU_ID_25331	JHU_ID_25331.3p	hsa-miR-4464	hsa-miR-4464_MIMAT0018988_Homo_sapiens_miR-4464	3p	uaguaagguuuggauagaugc	aucuauuauaaguuuauuaaa	aucuauuauaaguuuauuaaaaaucaggaaccuuaguaagguuuggauagaugc	chr6:90312716-90312770	+	B Cell Centrocyte	SRR060982	6	8	8	0	0
JHU_ID_25332	JHU_ID_25332.5p	hsa-miR-2113	hsa-miR-2113_MIMAT0009206_Homo_sapiens_miR-2113	5p	ugugacagguacagggacaaau	uugugcuuggcucugucacaug	ugugacagguacagggacaaaucccguuaauaaguaagaggauuugugcuuggcucugucacaug	chr6:98024545-98024610	+	Neuron iPSC	SRR1777168	3	6	6	0	0
JHU_ID_25333	JHU_ID_25333.3p	hsa-miR-5090	hsa-miR-5090_MIMAT0021082_Homo_sapiens_miR-5090	3p	ccccuaagccuucugcccccaac	ccggggcagauugguguagggugc	ccggggcagauugguguagggugcaaagccugcccgcccccuaagccuucugcccccaac	chr7:102465752-102465812	+	Smooth Muscle Cell Aorta	SRR5127217	4	4	4	0	0	TJU_CMC_MD2.ID03036.3p-miR	Ago_8598
JHU_ID_25334	JHU_ID_25334.3p	hsa-miR-4467	hsa-miR-4467_MIMAT0018994_Homo_sapiens_miR-4467	3p	cagccccugggccgccgccuccc	guggcggcgguaguuaugggcuucu	guggcggcgguaguuaugggcuucucuuucucaccagcagccccugggccgccgccuccc	chr7:102471471-102471531	+	Epithelium Retinal Pigment	SRR5127210	20	71	71	0	0	TJU_CMC_MD2.ID03037.3p-miR	Ago_8599
JHU_ID_25335	JHU_ID_25335.3p	hsa-miR-6132	hsa-miR-6132_MIMAT0024616_Homo_sapiens_miR-6132	3p	cugcugcucccaguccugccccu	cagcagggcuggggauugcagua	cagcagggcuggggauugcaguauccgcuguugcugcugcucccaguccugccccu	chr7:117020230-117020286	+	Smooth Muscle Cell Aorta	SRR5127217	14	107	107	0	0	TJU_CMC_MD2.ID03046.3p-miR	Ago_8708
JHU_ID_25336	JHU_ID_25336.5p	hsa-miR-3146	hsa-miR-3146_MIMAT0015018_Homo_sapiens_miR-3146	5p	ugcuaagucccuucuuucuauccu	gauagaaagaaugggacuuggccagg	ugcuaagucccuucuuucuauccuaguauaacuugaagaauucaaauagucaugcuaggauagaaagaaugggacuuggccagg	chr7:19705353-19705437	-	Thyroid	SRR1658404	1	1	1	0	0
JHU_ID_25337	JHU_ID_25337.3p	hsa-miR-3943	hsa-miR-3943_MIMAT0018359_Homo_sapiens_miR-3943	3p	cuaaguaaaguggggggugggc	cuagcccccaggcuucacuuggcg	cuagcccccaggcuucacuuggcguggacaacuugcuaaguaaaguggggggugggc	chr7:43150916-43150973	+	Thyroid	SRR1658408	5	12	12	0	0		Ago_8156
JHU_ID_25338	JHU_ID_25338.3p	hsa-miR-3683	hsa-miR-3683_MIMAT0018111_Homo_sapiens_miR-3683	3p	ugcuacgaacaauaucacaga	ugcgacauuggaaguaguauc	ugcgacauuggaaguaguaucaucucucccuuggaugcuacgaacaauaucacaga	chr7:7066975-7067031	-	Plasma	SRR822451	2	4	4	0	0	TJU_CMC_MD2.ID02949.3p-miR
JHU_ID_25339	JHU_ID_25339.5p	hsa-miR-5680	hsa-miR-5680_MIMAT0022468_Homo_sapiens_miR-5680	5p	uugcauuggguuagcagguuag	aaucugcuaauccaaugcaagc	uugcauuggguuagcagguuagcccagcauuucccuuccuggacacacaggaggagaaaugcuggacuaaucugcuaauccaaugcaagc	chr8:102125430-102125520	+	Lung	SRR1608282	14	24	24	0	0		Ago_9571
JHU_ID_25340	JHU_ID_25340.3p	hsa-miR-3926	hsa-miR-3926_MIMAT0018201_Homo_sapiens_miR-3926	3p	cugcuuuuuggccagcuccau	acggagcuggccaaaaagcagg	acggagcuggccaaaaagcaggcagagacgcuuuuaaagucucugccugcuuuuuggccagcuccau	chr8:12727235-12727302	+	Lung	SRR1608284	14	52	38	0	14	TJU_CMC_MD2.ID03107.3p-miR	Ago_9134
JHU_ID_25341	JHU_ID_25341.5p	hsa-miR-5194	hsa-miR-5194_MIMAT0021125_Homo_sapiens_miR-5194	5p	aggcccauucuuuucacucagga	cugagggguuuggaaugggaugg	aggcccauucuuuucacucaggaauuggauaagcuuuucugagggguuuggaaugggaugg	chr8:130008359-130008420	-	Mesangial	SRR5127221	6	10	10	0	0
JHU_ID_25342	JHU_ID_25342.5p	hsa-miR-4469	hsa-miR-4469_MIMAT0018996_Homo_sapiens_miR-4469	5p	agagcggcucuagguggguuuggc	ucccucuagggucgcucgga	agagcggcucuagguggguuuggcggcggcgaggacaccgccgcucccucuagggucgcucgga	chr8:42896202-42896266	-	Myoblast Skeletal Muscle	SRR1200834	1	1	1	0	0
JHU_ID_25343	JHU_ID_25343.5p	hsa-miR-4470	hsa-miR-4470_MIMAT0018997_Homo_sapiens_miR-4470	5p	ucuuucggcuuuccaguuugucu	gcaaacguggaagccgagagggc	ucuuucggcuuuccaguuugucucgguccuuuggaacguggcaaacguggaagccgagagggc	chr8:61714794-61714857	+	Liver	SRR950887	44	141	141	0	0		Ago_9393
JHU_ID_25344	JHU_ID_25344.3p	hsa-miR-7702	hsa-miR-7702_MIMAT0030017_Homo_sapiens_miR-7702	3p	gggagucugguagucuaagugu	ucuuagacugccagacucccug	ucuuagacugccagacucccugaggacaugcaguuucagggagucugguagucuaagugu	chr9:111271155-111271215	-	Heart	ERR038427	1	1	1	0	0	TJU_CMC_MD2.ID03314.5p-miR	Ago_10445
JHU_ID_25345	JHU_ID_25345.5p	hsa-miR-600	hsa-miR-600_MIMAT0003268_Homo_sapiens_miR-600	5p	cauaggaaggcucuugucuguca	acagacaagagccuugcucaggc	cauaggaaggcucuugucugucaggcaguggaguuacuuacagacaagagccuugcucaggc	chr9:123111556-123111618	-	Liver	SRR950886	56	233	233	0	0	TJU_CMC_MD2.ID03325.5p-miR	Ago_10537
JHU_ID_25346	JHU_ID_25346.5p	hsa-miR-2861	hsa-miR-2861_MIMAT0013802_Homo_sapiens_miR-2861	5p	ccggcucccccuggccucucgggaa	cccagggggccuggcggugggcggcggg	ccggcucccccuggccucucgggaacuacaagucccagggggccuggcggugggcggcggg	chr9:127785933-127785994	+	Hepatocellular carcinoma (HepG2)	ERR738404	3	3	3	0	0
JHU_ID_25347	JHU_ID_25347.5p	hsa-miR-4672	hsa-miR-4672_MIMAT0019754_Homo_sapiens_miR-4672	5p	gccucuguccagcuguguggccuug	ugguuacacagcuggacagaggcac	gccucuguccagcuguguggccuuggacaagccucuugguuacacagcuggacagaggcac	chr9:127869423-127869484	-	Myotube Skeletal Muscle	SRR1055961	2	2	2	0	0
JHU_ID_25348	JHU_ID_25348.3p	hsa-miR-548aw	hsa-miR-548aw_MIMAT0022471_Homo_sapiens_miR-548aw	3p	acuaggucggugcaaaagucauc	aggaguaggcaucagguuggguu	aggaguaggcaucagguuggguuuuaaaggaaauguagguuuugugaaauacuaggucggugcaaaagucauc	chr9:132945655-132945728	+	Smooth Muscle Cell Prostate	SRR5127222	95	1347	1317	0	30	TJU_CMC_MD2.ID03352.3p-miR	Ago_10730
JHU_ID_25349	JHU_ID_25349.3p	hsa-miR-4673	hsa-miR-4673_MIMAT0019755_Homo_sapiens_miR-4673	3p	cugacccggccccucuugcggcagg	ccaggcaggagccggacuggac	ccaggcaggagccggacuggaccucagggaagaggcugacccggccccucuugcggcagg	chr9:136519564-136519624	-	Breast adenocarcinoma	ERR227915	4	5	5	0	0
JHU_ID_25350	JHU_ID_25350.5p	hsa-miR-4479	hsa-miR-4479_MIMAT0019011_Homo_sapiens_miR-4479	5p	cgagcguggcuggcgcgg	gcgcgcggccgugcucgga	cgagcguggcuggcgcgggaaaguucgggaacgcgcgcggccgugcucgga	chr9:136886744-136886795	+	B Cell_memory	SRR060986	1	1	1	0	0
JHU_ID_25351	JHU_ID_25351.3p	hsa-miR-602	hsa-miR-602_MIMAT0003270_Homo_sapiens_miR-602	3p	ccgagugcgucuccugucagg	ugacacgggcgacagcugcggcc	ugacacgggcgacagcugcggcccgcuguguucacucgggccgagugcgucuccugucagg	chr9:137838433-137838494	+	Blood	SRR837475	3	4	4	0	0
JHU_ID_25352	JHU_ID_25352.5p	hsa-miR-4473	hsa-miR-4473_MIMAT0019000_Homo_sapiens_miR-4473	5p	cacuuguaauggagaacacuaagc	ugcuagugcucuccguuacaaguauc	cacuuguaauggagaacacuaagcuauggacugcuauggacugcuagugcucuccguuacaaguauc	chr9:20411158-20411225	-	Epithelium Mammary	SRR5127224	175	3991	3901	90	0	TJU_CMC_MD2.ID03250.5p-miR	Ago_10010
JHU_ID_25353	JHU_ID_25353.5p	hsa-miR-4477b	hsa-miR-4477b_MIMAT0019005_Homo_sapiens_miR-4477b	5p	acaaauguccuuaauagcaauccu	aaaugccauuaaggacauuuguga	acaaauguccuuaauagcaauccuuaaaugccauuaaggacauuuguga	chr9:63819591-63819640	+	Placenta	SRR822459	2	2	2	0	0		Ago_10169
JHU_ID_25354	JHU_ID_25354.5p	hsa-miR-3153	hsa-miR-3153_MIMAT0015026_Homo_sapiens_miR-3153	5p	uuuaaaugucccuguccccu	gaguagggacauuuaaaau	uuuaaaugucccuguccccuuccccccaauuaaaguagauugggggaaagcgaguagggacauuuaaaau	chr9:89312232-89312302	+	Red Blood Cell	SRR1664895	21	40	39	1	0	TJU_CMC_MD2.ID03288.5p-miR	Ago_10288
JHU_ID_25355	JHU_ID_25355.3p	hsa-miR-2278	hsa-miR-2278_MIMAT0011778_Homo_sapiens_miR-2278	3p	cagacagcuugcacugacuccag	ggagagcaguguguguugccuggg	ggagagcaguguguguugccuggggacuguguggacugguaucacccagacagcuugcacugacuccag	chr9:94809976-94810045	+	Lung	SRR1216774	20	34	32	2	0		Ago_10346
JHU_ID_25356	JHU_ID_25356.3p	hsa-miR-764	hsa-miR-764_MIMAT0010367_Homo_sapiens_miR-764	3p	gaggaggccauaguggcaacuguu	caggugcucacuuguccuccucca	caggugcucacuuguccuccuccaugcuuggaaaaugcagggaggaggccauaguggcaacuguu	chrX:114639446-114639511	+	BrainPrefrontalCortex	SRR1759215	20	94	94	0	0	TJU_CMC_MD2.ID03454.3p-miR
JHU_ID_25357	JHU_ID_25357.3p	hsa-miR-3672	hsa-miR-3672_MIMAT0018095_Homo_sapiens_miR-3672	3p	gauguuuuaugagucucaugau	caugagacucauguaaaacaucuu	caugagacucauguaaaacaucuuagacuauuacaagauguuuuaugagucucaugau	chrX:121370985-121371043	+	BrainPrefrontalCortex	ERR409893	1	2	2	0	0
JHU_ID_25358	JHU_ID_25358.5p	hsa-miR-3937	hsa-miR-3937_MIMAT0018352_Homo_sapiens_miR-3937	5p	caguugcuacaguucccuguuguu	caacaggcggcuguagcaaugggg	caguugcuacaguucccuguuguuucagcucgacaacaacaggcggcuguagcaaugggg	chrX:39661238-39661298	+	BrainPrefrontalCortex	SRR1759215	2	7	7	0	0		Ago_21354
JHU_ID_25359	JHU_ID_25359.3p	hsa-miR-325	hsa-miR-325_MIMAT0000771_Homo_sapiens_miR-325	3p	uuauugaggaccuccuaucaa	ccuaguagguguccaguaagu	ccuaguagguguccaguaaguguuugugacauaauuuguuuauugaggaccuccuaucaa	chrX:77005426-77005486	-	Skin	SRR1259236	1	1	1	0	0		Ago_21547
JHU_ID_25360	JHU_ID_25360.5p	hsa-miR-7854-3p	hsa-miR-7854-3p_MIMAT0030429_Homo_sapiens_miR-7854-3p	5p	cuuccaucuccaucaccuugagc	ugaggugaccgcagaugggaagga	cuuccaucuccaucaccuugagcaucuucugggcagcugaggugaccgcagaugggaagga	chr16:81533905-81533966	+	Colon adenocarcinoma	SRR1917336	205	3640	3640	0	0	TJU_CMC_MD2.ID01192.5p-miR	Ago_16462
JHU_ID_25361	JHU_ID_25361.5p	hsa-miR-7852-3p	hsa-miR-7852-3p_MIMAT0030427_Homo_sapiens_miR-7852-3p	5p	auauguauguaguagucaaagg	uuugacuacuacauacauaug	uuugacuacuacauacauaugccuacuacuacuuucauauguaggcauauguauguaguagucaaagg	chr1:107897231-107897299	+	Lung	SRR372640	45	86	80	0	6	TJU_CMC_MD2.ID00176.5p-miR	Ago_1045
JHU_ID_25362	JHU_ID_25362.5p	hsa-miR-7849-3p	hsa-miR-7849-3p_MIMAT0030424_Homo_sapiens_miR-7849-3p	5p	aacaucagacucaaggccaaca	uugaucuugggccugauguuca	aacaucagacucaaggccaacaacugacuacuucgaaaaugggaaguagacaauuguugaucuugggccugauguuca	chr4:146408598-146408676	+	Endothelial Coronary	SRR5127228	12	16	16	0	0	TJU_CMC_MD2.ID02573.5p-miR
JHU_ID_25363	JHU_ID_25363.5p	hsa-miR-7846-3p	hsa-miR-7846-3p_MIMAT0030421_Homo_sapiens_miR-7846-3p	5p	uagcgagcgcagcggagccug	ggcccgcuggggcgcgggc	ggcccgcuggggcgcgggcuuucgcuuucagucgagggcuagcgagcgcagcggagccug	chr1:12166962-12167022	+	CD3+ T Cell Splenic	SRR5127200	9	22	22	0	0
JHU_ID_25364	JHU_ID_25364.3p	hsa-miR-7845-5p	hsa-miR-7845-5p_MIMAT0030420_Homo_sapiens_miR-7845-5p	3p	cucgggcuggucgccgaccuccg	agggucguggcgacacucgcgcc	agggucguggcgacacucgcgccagcucccgggacggcugggcucgggcuggucgccgaccuccg	chr2:207166413-207166478	+	Cervical cancer	SRR1304304	18	48	45	1	2	TJU_CMC_MD2.ID01958.3p-miR	Ago_3469
JHU_ID_25365	JHU_ID_25365.3p	hsa-miR-770-5p	hsa-miR-770-5p_MIMAT0003948_Homo_sapiens_miR-770-5p	3p	gggccugauguggugcugg	aguaccacgugucagggccacau	aguaccacgugucagggccacaugagcugggccucgugggccugauguggugcugg	chr14:100852412-100852468	+	BrainCerebellum	SRR553573	19	239	238	1	0	TJU_CMC_MD2.ID00934.3p-miR	Ago_14948
JHU_ID_25366	JHU_ID_25366.3p	hsa-miR-6718-5p	hsa-miR-6718-5p_MIMAT0025849_Homo_sapiens_miR-6718-5p	3p	ucauaagccuuuuggccacuagg	uaguggucagagggcuuaugaua	uaguggucagagggcuuaugauauauugugagagccaugucauaagccuuuuggccacuagg	chr18:3885363-3885425	+	Monocytic leukemia	DRR000555	15	62	62	0	0	TJU_CMC_MD2.ID01467.3p-miR	Ago_17963
																	136
																	71
