# Supplementary material for: Toward the human cellular microRNAome
Source: HighWire-hosted journal article supplement (doi:10.1101/gr.222067.117), 2017-09-06
Supplement: Supplemental_Table_S9.xlsx [file Supplemental_Table_S9.xlsx]

## Sheet: Sheet1
FINAL JHH_miRNA_ID hairpin	FINAL JHH_miRNA_ID_dom_miRNA	FINAL JHH_miRNA_ID_minor_miRNA	Chr	Start	Stop	Animal	miRNA_match
JHU_ID_25111	JHU_ID_25111.5p	JHU_ID_25111.3p	chr1	1.71591e+08	1.71591e+08	Rhesus macaque	mml-miR-7178-5p_MIMAT0028300_Macaca_mulatta_miR-7178-5p
JHU_ID_25112	JHU_ID_25112.5p	JHU_ID_25112.3p	chr10	1.01903e+08	1.01903e+08	Rhesus macaque	mml-miR-7201-5p_MIMAT0028366_Macaca_mulatta_miR-7201-5p
JHU_ID_25113	JHU_ID_25113.5p	JHU_ID_25113.3p	chr10	9.61284e+07	9.61285e+07	Rhesus macaque	mml-miR-7199-3p_MIMAT0028363_Macaca_mulatta_miR-7199-3p
JHU_ID_25123	JHU_ID_25123.5p	JHU_ID_25123.3p	chr12	8.67451e+07	8.67451e+07	Rhesus macaque	mml-miR-3059-5p_MIMAT0028246_Macaca_mulatta_miR-3059-5p
JHU_ID_25125	JHU_ID_25125.5p	JHU_ID_25125.3p	chr13	1.10237e+08	1.10237e+08	Rhesus macaque	mml-miR-7170-3p_MIMAT0028275_Macaca_mulatta_miR-7170-3p
JHU_ID_25130	JHU_ID_25130.5p	JHU_ID_25130.3p	chr15	7.50124e+07	7.50125e+07	Rhesus macaque	mml-miR-7192-3p_MIMAT0028343_Macaca_mulatta_miR-7192-3p
JHU_ID_25145	JHU_ID_25145.5p	JHU_ID_25145.3p	chr3	8.56157e+07	8.56157e+07	Rhesus macaque	mml-miR-7183-5p_MIMAT0028318_Macaca_mulatta_miR-7183-5p
JHU_ID_25137	JHU_ID_25137.3p	JHU_ID_25137.5p	chr17	8.20246e+07	8.20247e+07	Rhesus macaque	mml-miR-7165-5p_MIMAT0028262_Macaca_mulatta_miR-7165-5p
JHU_ID_25139	JHU_ID_25139.3p	JHU_ID_25139.5p	chr2	1.88974e+08	188974511	Horse	eca-miR-9182_MIMAT0034763_Equus_caballus_miR-9182
JHU_ID_25146	JHU_ID_25146.5p	JHU_ID_25146.3p	chr4	1.5736e+08	1.5736e+08	Platypus	oan-miR-2985-5p_MIMAT0028956_Ornithorhynchus_anatinus_miR-2985-5p
JHU_ID_25147	JHU_ID_25147.5p	JHU_ID_25147.3p	chr5	7.80567e+07	7.80567e+07	Platypus	oan-miR-1327-3p_MIMAT0026750_Ornithorhynchus_anatinus_miR-1327-3p
JHU_ID_25114	JHU_ID_25114.5p	JHU_ID_25114.3p	chr10	9.78758e+07	9.78759e+07	Mouse	mmu-miR-3085-3p_MIMAT0014879_Mus_musculus_miR-3085-3p
JHU_ID_25135	JHU_ID_25135.3p		chr17	46816265	46816324	Rat	rno-miR-466c-5p_MIMAT0005279_Rattus_norvegicus_miR-466c-5p
JHU_ID_25154	JHU_ID_25154.5p	JHU_ID_25154.3p	chr9	4.85031e+06	4.85037e+06	Rat	rno-miR-101b-5p_MIMAT0017045_Rattus_norvegicus_miR-101b-5p
JHU_ID_25134	JHU_ID_25134.5p		chr16	69330860	69330925	Virus	blv-miR-B4-5p_MIMAT0027347_Bovine_leukemia_miR-B4-5p
