# Supplementary material for: Toward the human cellular microRNAome
Source: HighWire-hosted journal article supplement (doi:10.1101/gr.222067.117), 2017-09-06
Supplement: Supplemental_Table_S10.xlsx [file Supplemental_Table_S10.xlsx]

## Sheet: Sheet1
FINAL JHH_miRNA_ID hairpin	FINAL JHH_miRNA_ID_dom_miRNA	FINAL JHH_miRNA_ID_passenger_miRNA	consensus mature sequence	consensus star sequence (real/hypothetical)	consensus precursor sequence	precursor coordinate hg38	Representative Sample Type	SRA Number	Total Counts	Mature read counts	Loop read counts	Star read counts	TJU miRNA	AgomiRNA	Ortholog	Within GENE?	Adjacent miRNA
JHU_ID_00104	JHU_ID_00104.5p	JHU_ID_00104.3p	uuuugggacaaaguuucacucuu	gagugagaccuugucacaaacaaac	gagugagaccuugucacaaacaaacaaaaaaaaccauguuuuugggacaaaguuucacucuu	chr1:11100746-11100808	BrainPrefrontalCortex	ERR409900	197	190	0	7		Ago_234
JHU_ID_00129	JHU_ID_00129.5p	JHU_ID_00129.3p	uucaggucuggggcugaaaccugu	aggcagucccaggcccgaaag	uucaggucuggggcugaaaccugucuuguuuccccaucagaggcagucccaggcccgaaag	chr1:112882060-112882121	Colon adenocarcinoma	SRR1917329	1270	1240	0	30		Ago_1101
JHU_ID_00176	JHU_ID_00176.3p	JHU_ID_00176.5p	ucuuguagcagguauuuucccu	gggaaauaucugcuaccagauu	gggaaauaucugcuaccagauuagagauuaaggaaaucuuguagcagguauuuucccu	chr1:117854810-117854868	Smooth Muscle Cell Prostate	SRR5127222	1043	1039	0	4		Ago_1138		SNORA40
JHU_ID_00265	JHU_ID_00265.5p	JHU_ID_00265.3p	agggacgcagcacggagggcgcg	cccucccgccugcgccccuc	agggacgcagcacggagggcgcgcucagccccgccgcccucccgccugcgccccuc	chr1:1349312-1349368	Biliosphere	ERR842903	303	268	0	35	TJU_CMC_MD2.ID00010.3p-miR	Ago_47		DVL1	MIR6808
JHU_ID_00306	JHU_ID_00306.5p	JHU_ID_00306.3p	cuaaccagcgcgaagacugc	ugucuuucucgcuggagaagua	ugucuuucucgcuggagaaguaaggagugucagccgguuuauccuaggcuaaccagcgcgaagacugc	chr1:144551573-144551641	T cell leukemia	SRR1304307	167	124	0	43		Ago_1192
JHU_ID_00400	JHU_ID_00400.5p	JHU_ID_00400.3p	uagagcuccgaucccauccac	agauggggccagaguguucuaga	agauggggccagaguguucuagagauccagacucuagagcuccgaucccauccac	chr1:149928392-149928447	Lung Adenocarcinoma	SRR1013980	959	863	0	96	TJU_CMC_MD2.ID00192.3p-miR	Ago_1288
JHU_ID_00406	JHU_ID_00406.3p	JHU_ID_00406.5p	ugaggccgagaaggcaaccgcga	gcguuguccucgcgccuucgcc	gcguuguccucgcgccuucgcccuggguaggugaggccgagaaggcaaccgcga	chr1:150234737-150234791	Colon adenocarcinoma	SRR1917336	1684	1682	0	2	TJU_CMC_MD2.ID00194.3p-miR	Ago_1293		ANP32E
JHU_ID_00468	JHU_ID_00468.3p	JHU_ID_00468.5p	ucaccccugcuuccucugccaga	ucggcaaggggagcaggaggaggacu	ucggcaaggggagcaggaggaggacugcggcggucaccccugcuuccucugccaga	chr1:153536278-153536334	Colon adenocarcinoma	SRR1917329	414	412	0	2	TJU_CMC_MD2.ID00203.3p-miR	Ago_1339
JHU_ID_00481	JHU_ID_00481.5p	JHU_ID_00481.3p	cgccugacgccuuuccgcccccagc	gccgggcggaggcugccagggagua	gccgggcggaggcugccagggaguauguuggcuccaugcgccugacgccuuuccgcccccagc	chr1:153783683-153783746	Lung Adenocarcinoma	SRR1013979	183	176	0	7		Ago_1348
JHU_ID_00524	JHU_ID_00524.5p	JHU_ID_00524.3p	uggggagggacgcagggcgcccgc	gggcgcccuucccuccccgcg	gggcgcccuucccuccccgcggggcaccgucacgcguggggagggacgcagggcgcccgc	chr1:155001768-155001828	Hodgkin lymphoma	SRR1535276	166	162	0	4	TJU_CMC_MD2.ID00208.5p-miR	Ago_1389
JHU_ID_00572	JHU_ID_00572.5p	JHU_ID_00572.3p	uggcuguaacaagaaauuuaag	uaaauuucuuguuucagccau	uggcuguaacaagaaauuuaagucaauuaaagggggugucagguaucccuuugacuuaaauuucuuguuucagccau	chr1:15619912-15619989	Lung	SRR372642	59	54	0	5		Ago_299		DDI2
JHU_ID_00772	JHU_ID_00772.3p	JHU_ID_00772.5p	uagagcugaauuacuuuccaga	uggaaaguaagucagcccuaag	uggaaaguaagucagcccuaaguuuaaauagcccagaaaauuuagagcugaauuacuuuccaga	chr1:167471283-167471347	CD4+ T Cell	SRR1532973	87	86	0	1	TJU_CMC_MD2.ID00232.3p-miR	Ago_1570
JHU_ID_00861	JHU_ID_00861.5p	JHU_ID_00861.3p	ugcccccuccucugccaugg	guaagcagagagccagaggggcugg	guaagcagagagccagaggggcugggaccaccuccuugugcccccuccucugccaugg	chr1:176570729-176570787	Placenta	SRR567637	338	336	0	2		Ago_1651		PAPPA2
JHU_ID_00903	JHU_ID_00903.5p	JHU_ID_00903.3p	ccucuccuaaccucgcucucgc	agagucgagagugggagaagagc	agagucgagagugggagaagagcggagcgugugagcaguacugcggccuccucuccucuccuaaccucgcucucgc	chr1:182391714-182391790	Macrophage	SRR1532975	1116	832	20	264	TJU_CMC_MD2.ID00247.3p-miR	Ago_1688		GLUL
JHU_ID_00915	JHU_ID_00915.5p	JHU_ID_00915.3p	acagcccaggggccucuggcu	agccagaggccccugggcugug	agccagaggccccugggcuguguauuucaucacuaugagacacagcccaggggccucuggcu	chr1:183676690-183676752	B cell lymphoblastoid	SRR1304313	64	53	0	11		Ago_1699
JHU_ID_00946	JHU_ID_00946.5p	JHU_ID_00946.3p	ucacucuaggguuggggacagu	ugcccugacuucagagcuugaag	ugcccugacuucagagcuugaaggugaacucugaccccuucacucuaggguuggggacagu	chr1:19068657-19068718	Colon adenocarcinoma	SRR1917329	342	335	0	7		Ago_364
JHU_ID_00957	JHU_ID_00957.5p	JHU_ID_00957.3p	ccuguucguaaauguuagugga	uaacguuuaugaacagucagga	ccuguucguaaauguuaguggauuauuacauuacauugcacuaacguuuaugaacagucagga	chr1:193157267-193157330	Adrenal	SRR944034	142	138	0	4	TJU_CMC_MD2.ID00251.5p-miR	Ago_1733		CDC73	MIR1278
JHU_ID_00997	JHU_ID_00997.5p	JHU_ID_00997.3p	cacagacagagagggcuaaggug	cccagcccucuucugucucccac	cacagacagagagggcuaaggugccugaguguggagcccagcccucuucugucucccac	chr1:200991727-200991786	T cell leukemia	SRR1292461	117	110	0	7	TJU_CMC_MD2.ID00254.3p-miR	Ago_1775		KIF21B
JHU_ID_01047	JHU_ID_01047.5p	JHU_ID_01047.3p	cacccaccugcccuuucuugcu	caagaaaggguagguggguggg	cacccaccugcccuuucuugcuccaccagcaggagagcaagaaaggguagguggguggg	chr1:203175129-203175188	Myoblast Skeletal Muscle	SRR5127218	94	85	0	9		Ago_1808		MYBPH
JHU_ID_01094	JHU_ID_01094.5p	JHU_ID_01094.3p	uuagcucccucuucccauguuc	gcugggaagguggugcugcuga	gcugggaagguggugcugcugagugcggguuauuccauuagcucccucuucccauguuc	chr1:204996328-204996387	Neuron iPSC	SRR1777169	7390	7105	0	285	TJU_CMC_MD2.ID00260.3p-miR	Ago_1839		NFASC
JHU_ID_01240	JHU_ID_01240.5p	JHU_ID_01240.3p	uuggggggugguaacuguaggagc	cccccgcccacguugccacccccaa	uuggggggugguaacuguaggagcagcccacaaagcccacugcccccgcccacguugccacccccaa	chr1:21865078-21865145	Endothelial Coronary (0529)	SRR5127228	72	62	0	10		Ago_401		HSPG2
JHU_ID_01269	JHU_ID_01269.5p	JHU_ID_01269.3p	agcgguugcuucauaggagaga	ucuccuaugaagcaaccgcugc	agcgguugcuucauaggagagaaaacuaauguuaguuuucucuccuaugaagcaaccgcugc	chr1:221668203-221668265	Adrenal	SRR944034	400	371	0	29		Ago_1951
JHU_ID_01419	JHU_ID_01419.3p	JHU_ID_01419.5p	ucauguugcucugcuguugcc	cagcagcauggcugacuaaagaca	cagcagcauggcugacuaaagacauugacaucaugacauugucauguugcucugcuguugcc	chr1:231264808-231264870	Cervical cancer	SRR1304304	9819	9817	0	2		Ago_2049		GNPAT
JHU_ID_01488	JHU_ID_01488.5p	JHU_ID_01488.3p	uggaagaggauaggguuguuc	acaacccuauccucuuccaga	uggaagaggauaggguuguucuauaaagguacugcuaggaacaacccuauccucuuccaga	chr1:237573517-237573578	BrainPrefrontalCortex	SRR1759215	419	403	0	16		Ago_2102			MIR4428
JHU_ID_01807	JHU_ID_01807.5p	JHU_ID_01807.3p	ggaggcaaacuuugagcgugucu	gaagccucaguuucccucuccu	ggaggcaaacuuugagcgugucucaggagccuaaaacaugagaagccucaguuucccucuccu	chr1:33265641-33265704	Colon adenocarcinoma	SRR1917329	171	166	0	5		Ago_555
JHU_ID_01993	JHU_ID_01993.5p	JHU_ID_01993.3p	cucaggacugggucauucuguu	cgguaacucgagucugggcuc	cgguaacucgagucugggcucccggaggacacugaagauggaggccugcuccguagcccucucaggacugggucauucuguu	chr1:43600408-43600490	Colon adenocarcinoma	SRR1917329	1139	1111	0	28	TJU_CMC_MD2.ID00126.5p-miR	Ago_686		PTPRF
JHU_ID_02031	JHU_ID_02031.5p	JHU_ID_02031.3p	agagguggugggaaguaugcagc	ugcccauacuuucaccccucucu	agagguggugggaaguaugcagcaagucagguuuauagagcugcccauacuuucaccccucucu	chr1:44884291-44884355	B Cell Centroblast	SRR060981	580	536	2	42	TJU_CMC_MD2.ID00134.3p-miR	Ago_722		EIF2B3
JHU_ID_02156	JHU_ID_02156.5p	JHU_ID_02156.3p	ucaggccaggcugggaggaugc	agccucccagucuggccugagu	ucaggccaggcugggaggaugcuguaaaugcagccucccagucuggccugagu	chr1:55318692-55318745	Platelet	SRR1592249	340	286	0	54	TJU_CMC_MD2.ID00144.3p-miR	Ago_814			MIR4422
JHU_ID_02159	JHU_ID_02159.5p	JHU_ID_02159.3p	aggcacuaaagaaacacuggag	ccagugucucuuuagugccugg	ccagugucucuuuagugccuggcaccuacucugugcccaggcacuaaagaaacacuggag	chr1:56436508-56436568	BrainFrontalcortex	SRR553572	738	622	1	115	TJU_CMC_MD2.ID00146.3p-miR	Ago_817
JHU_ID_02215	JHU_ID_02215.5p	JHU_ID_02215.3p	gggguuuugcaguccuuagc	gggcuuugaaggcucuuggu	gggguuuugcaguccuuagcuguugcagaaauuaaguauugcaacuuacugagggcuuugaaggcucuuggu	chr1:630702-630774	Lung	SRR1608271	2006	1879	27	100		Ago_1
JHU_ID_02222	JHU_ID_02222.5p	JHU_ID_02222.3p	uccacauguaaaaaaaugaauc	uucauuauuuugcauguguaua	uucauuauuuugcauguguauaaccaguuacugaaacagauauccacauguaaaaaaaugaauc	chr1:63501092-63501156	Tongue squamous carcinoma	SRR1810082	119	118	0	1		Ago_851		ITGB3BP
JHU_ID_02283	JHU_ID_02283.3p	JHU_ID_02283.5p	ugcuccccgcgcgccggcucugc	gaguccgcgcugcgggagcggg	gaguccgcgcugcgggagcggguggcuugcaccugcuccccgcgcgccggcucugc	chr1:75614944-75615000	Cervical cancer	SRR1304304	256	255	0	1		Ago_898
JHU_ID_02337	JHU_ID_02337.5p	JHU_ID_02337.3p	uugaguuacuuugccuuaucc	augaggcagaguaacucacaauagaa	augaggcagaguaacucacaauagaacaaacaguuuugaguuacuuugccuuaucc	chr1:87051314-87051370	Cervical cancer	SRR1304304	852	827	0	25	TJU_CMC_MD2.ID00161.3p-miR	Ago_947		RP5-1052I5.2
JHU_ID_02388	JHU_ID_02388.5p	JHU_ID_02388.3p	agccugcggcuggcguuugaggc	ccugagcgcggcggcugggucu	agccugcggcuggcguuugaggcggauggcagugcccugagcgcggcggcugggucu	chr1:93847425-93847482	Cervical cancer	SRR1304304	100	85	0	15		Ago_997		RP4-561L24.3
JHU_ID_02395	JHU_ID_02395.5p	JHU_ID_02395.3p	cggucagcugcgcccggccuga	agguuggggcggcugcucgc	agguuggggcggcugcucgcucgcgcgcagaacgcggcggucagcugcgcccggccuga	chr1:94247842-94247901	Colon adenocarcinoma	SRR1917329	82	65	0	17	TJU_CMC_MD2.ID00168.3p-miR	Ago_999
JHU_ID_02399	JHU_ID_02399.3p	JHU_ID_02399.5p	uagacacuguacuccaaccuu	gagcuggaggccgcagugagcuaug	gagcuggaggccgcagugagcuaugauggcaccugugcauagacacuguacuccaaccuu	chr1:94895307-94895367	Cervical cancer	SRR1304304	757	740	0	17		Ago_1007
JHU_ID_02404	JHU_ID_02404.5p	JHU_ID_02404.3p	uugagacucugggucagucu	gacugacccagagucucaagc	gacugacccagagucucaagcacaauugaaaugugcuugagacucugggucagucu	chr1:95154839-95154895	Red Blood Cell	SRR5127232	2650	2451	0	199		Ago_1010
JHU_ID_02416	JHU_ID_02416.5p	JHU_ID_02416.3p	aggccagggagacaagcugca	cagcccugcuuccccggccccc	aggccagggagacaagcugcacuuugagccguguuaacagcccugcuuccccggccccc	chr1:9717476-9717535	T cell leukemia	SRR1292463	64	63	0	1		Ago_211
JHU_ID_02485	JHU_ID_02485.5p	JHU_ID_02485.3p	aagagcucucugacuucgccu	gcaaagccagagagcucuucc	gcaaagccagagagcucuuccuggggaaagcuuggaagagcucucugacuucgccu	chr10:102227076-102227132	Cervical cancer	SRR1532965	262	260	0	2		Ago_11559		ELOVL3
JHU_ID_02546	JHU_ID_02546.3p	JHU_ID_02546.5p	ucagacgucucgaggcucgcguu	ugcgagcccgaggcgcugcgaacg	ugcgagcccgaggcgcugcgaacggugccuaacgucagacgucucgaggcucgcguu	chr10:1049256-1049313	Neuron iPSC	SRR1777161	849	838	0	11	TJU_CMC_MD2.ID00308.3p-miR	Ago_10926
JHU_ID_02547	JHU_ID_02547.5p	JHU_ID_02547.3p	accccuucggcugcugggcca	gccccgcagccccgaggggucu	gccccgcagccccgaggggucugggcgcgcugaagaccccuucggcugcugggcca	chr10:1056641-1056697	Cervical cancer	SRR1304304	3121	3119	1	1	TJU_CMC_MD2.ID00310.3p-miR	Ago_10928		WDR37
JHU_ID_02609	JHU_ID_02609.5p	JHU_ID_02609.3p	ugggaugcacucugugcugggaug	ucucagccaaguggccccaua	ucucagccaaguggccccauaggcaaaguugcccugggccuccugggaugcacucugugcugggaug	chr10:116703811-116703878	Neuron iPSC	SRR1777167	214	213	0	1		Ago_11654		HSPA12A
JHU_ID_02819	JHU_ID_02819.3p	JHU_ID_02819.5p	ucucggcccugucuccuccagc	uggaggggcacgggggucccagc	uggaggggcacgggggucccagcucugacccaggcucucggcccugucuccuccagc	chr10:133267416-133267473	Lung Adenocarcinoma	SRR1013968	1206	1203	0	3	TJU_CMC_MD2.ID00461.3p-miR	Ago_11789		ADAM8
JHU_ID_02820	JHU_ID_02820.5p	JHU_ID_02820.3p	gagccccugucggcugaggcc	cagcgggcaggggcuaca	gagccccugucggcugaggcccggccuggguggccuccguggauggaaccugcauggucaccgggcagcgggcaggggcuaca	chr10:133269678-133269761	T cell leukemia	SRR1304307	282	278	2	2		Ago_11791		ADAM8
JHU_ID_02834	JHU_ID_02834.3p	JHU_ID_02834.5p	agaggcgccgggcggcgggaa	cccgccccccgcgcccgucg	cccgccccccgcgcccgucgccggcucaggcccgagaggcgccgggcggcgggaa	chr10:135439-135494	B cell lymphoblastoid	SRR1304313	81	80	0	1		Ago_10895		ZMYND11
JHU_ID_03108	JHU_ID_03108.5p	JHU_ID_03108.3p	ugacacagagagagagacagga	ugucucucucucuccgugucagug	ugacacagagagagagacaggaauuauguucacuuucugucucucucucuccgugucagug	chr10:48827482-48827543	Dendritic	SRR1708910	154	118	0	36	TJU_CMC_MD2.ID00357.5p-miR	Ago_11218		WDFY4
JHU_ID_03109	JHU_ID_03109.5p	JHU_ID_03109.3p	aaacuuaugaaaagugacuguu	cagucccuuuuauaaguuugg	aaacuuaugaaaagugacuguuuuuaaaagacuagucugaauccaaacagucccuuuuauaaguuugg	chr10:4884591-4884659	Colon adenocarcinoma	SRR1917336	85	81	0	4		Ago_10959
JHU_ID_03135	JHU_ID_03135.5p	JHU_ID_03135.3p	ccccgagcccuggggucggugc	cccgcccccagggcccgguuggcu	cccgcccccagggcccgguuggcuguggccccgcccccgagcccuggggucggugc	chr10:5446535-5446591	Embryonic kidney	SRR1240817	69	57	0	12		Ago_10962		NET1
JHU_ID_03137	JHU_ID_03137.5p	JHU_ID_03137.3p	uggcugcuguacucagagg	uucugaguacagcagccag	uucugaguacagcagccagagcacugaaauggcucuggcugcuguacucagagg	chr10:54691549-54691603	Testes	SRR333682	700	666	0	34		Ago_11241			MIR548F1
JHU_ID_03142	JHU_ID_03142.5p	JHU_ID_03142.3p	uuaauauguacugacaaagcgu	uuuuugucaguacauguuaaug	uuaauauguacugacaaagcguaucuguguaauaaauaugcuuuuugucaguacauguuaaug	chr10:5687107-5687170	Colon adenocarcinoma	SRR1917329	2095	1511	0	584	TJU_CMC_MD2.ID00317.5p-miR	Ago_10966		FAM208B
JHU_ID_03234	JHU_ID_03234.5p	JHU_ID_03234.3p	cccaucugauggggaauggccug	aggccauuccccaucagau	aggccauuccccaucagaugaguccuagcaguuugggcccaucugauggggaauggccug	chr10:70322917-70322977	Lung Adenocarcinoma	SRR1013967	892	853	0	39		Ago_11318		LRRC20
JHU_ID_03287	JHU_ID_03287.5p	JHU_ID_03287.3p	ucccccggaucugccccuccag	agggcaggaaggugggucuu	agggcaggaaggugggucuucuugugacugaaggucccccggaucugccccuccag	chr10:73782267-73782323	Platelet	SRR1592247	4666	4611	0	55	TJU_CMC_MD2.ID00380.3p-miR	Ago_11349		CHCHD1
JHU_ID_03296	JHU_ID_03296.5p	JHU_ID_03296.3p	caugguccauuuugcucugcuu	agcagagcaaaacggaccaugc	caugguccauuuugcucugcuucugaaagcugaguacuuugcaagcagagcaaaacggaccaugc	chr10:74128708-74128773	Cervical cancer	SRR1304304	1592	1418	1	173	TJU_CMC_MD2.ID00383.3p-miR	Ago_11353		AP3M1
JHU_ID_03480	JHU_ID_03480.5p	JHU_ID_03480.3p	ucaggucuucagacuguggggcu	ccccccugguuugcaggccuuuug	ucaggucuucagacuguggggcuuacacgagcagccccccugguuugcaggccuuuug	chr10:92864753-92864811	Colon adenocarcinoma	SRR1917329	972	965	0	7	TJU_CMC_MD2.ID00405.3p-miR	Ago_11488		EXOC6
JHU_ID_03483	JHU_ID_03483.3p	JHU_ID_03483.5p	uauauauaguauaugugcaugu	augugcacauauauuauauaug	augugcacauauauuauauaugugugucuauauaugauauauauaguauaugugcaugu	chr10:9319051-9319110	Neuron Cortical	SRR5127209	1069	1007	0	62		Ago_10994
JHU_ID_03561	JHU_ID_03561.5p	JHU_ID_03561.3p	uagagauccgcuugcugcgcugu	agcucugucagucaaguggacucuagg	agcucugucagucaaguggacucuaggaagggauuggccccuagagauccgcuugcugcgcugu	chr11:106022497-106022561	Cervical cancer	SRR1304304	116	115	0	1		Ago_12807
JHU_ID_03574	JHU_ID_03574.5p	JHU_ID_03574.3p	cgggacagcgggcgggaaagggag	cgcguucccgcccgagggagacgag	cgcguucccgcccgagggagacgaggcgggacagcgggcgggaaagggag	chr11:108498493-108498543	Adrenal	SRR944031	150	146	0	4	TJU_CMC_MD2.ID00615.5p-miR	Ago_12820
JHU_ID_03599	JHU_ID_03599.5p	JHU_ID_03599.3p	ucuggccaugucucaacuuugu	cacaaguggacaaggccagc	ucuggccaugucucaacuuugugcuaggaguaaaacauggagcaaguggagacuagcacaaguggacaaggccagc	chr11:112697396-112697472	BrainPrefrontalCortex	ERR409900	1174	1152	0	22		Ago_12837
JHU_ID_03685	JHU_ID_03685.5p	JHU_ID_03685.3p	cacaacagccucguucuuccug	ggaagaaccaggcuguuaugcc	ggaagaaccaggcuguuaugccaugugggcauguggcacaacagccucguucuuccug	chr11:118630959-118631017	Lung Adenocarcinoma	SRR1013979	341	338	0	3	TJU_CMC_MD2.ID00624.3p-miR	Ago_12891		PHLDB1
JHU_ID_03735	JHU_ID_03735.5p	JHU_ID_03735.3p	ccucccggaccagggcuucc	cggcccugcgccgggagacg	cggcccugcgccgggagacgccgccgccuccgccucccggaccagggcuucc	chr11:120336427-120336479	Lung Adenocarcinoma	SRR1013979	382	346	0	36	TJU_CMC_MD2.ID00629.3p-miR	Ago_12916
JHU_ID_03743	JHU_ID_03743.5p	JHU_ID_03743.3p	ccagagaaggcugcuccucacc	ugggggcagcauucucuguag	ugggggcagcauucucuguagauaguuucuaauuccccagagaaggcugcuccucacc	chr11:121482471-121482529	Colon adenocarcinoma	SRR1917329	133	121	0	12	TJU_CMC_MD2.ID00635.5p-miR	Ago_12923		SORL1
JHU_ID_03753	JHU_ID_03753.5p	JHU_ID_03753.3p	aaaagggggcugagguggagg	uuccccuuaguuuccuuuaag	uuccccuuaguuuccuuuaagagugauaaaaauggaaaagggggcugagguggagg	chr11:122152101-122152157	Myoblast Skeletal Muscle	SRR1200890	6520	6375	0	145		Ago_12928			MIRLET7A2
JHU_ID_03754	JHU_ID_03754.5p	JHU_ID_03754.3p	caccacaaucggauacuugcu	ccaggaauccugcuguggugga	ccaggaauccugcugugguggagaggcauagacucaugaguccaccacaaucggauacuugcu	chr11:122156196-122156259	Lung Adenocarcinoma	SRR1013968	2612	1824	40	748	TJU_CMC_MD2.ID00638.5p-miR	Ago_12929			MIR100HG
JHU_ID_03766	JHU_ID_03766.5p	JHU_ID_03766.3p	aggacccugcaggaauggacgu	gccuuuuccugcagcacccca	aggacccugcaggaauggacgugugacaaaaaaacagccuuuuccugcagcacccca	chr11:122779803-122779860	Colon adenocarcinoma	SRR1917329	372	371	0	1	TJU_CMC_MD2.ID00639.5p-miR	Ago_12932		UBASH3B
JHU_ID_03770	JHU_ID_03770.5p	JHU_ID_03770.3p	auuccuuuuucucuuccucaga	ucagggagaaagaaggguuauu	ucagggagaaagaaggguuauuaacauuaaaagaacuugcaguaauuccuuuuucucuuccucaga	chr11:123057918-123057984	Neuron Dopaminergic	SRR5127234	1019	749	9	261	TJU_CMC_MD2.ID00640.3p-miR	Ago_12933		HSPA8
JHU_ID_03775	JHU_ID_03775.5p	JHU_ID_03775.3p	gcaggaagagacgcagcagcuug	agcuucugcaucuuuucuuccc	gcaggaagagacgcagcagcuugucuuugauucugccaagcuucugcaucuuuucuuccc	chr11:12321513-12321573	Lung Adenocarcinoma	SRR1013980	393	376	0	17	TJU_CMC_MD2.ID00501.5p-miR	Ago_11985
JHU_ID_03790	JHU_ID_03790.5p	JHU_ID_03790.3p	cauuccagggcucuccucuacc	uggaggggaaacuuggauuggg	uggaggggaaacuuggauuggggagagggcucugcccucccuuccucauuccagggcucuccucuacc	chr11:123609722-123609790	Lung Adenocarcinoma	SRR1304309	640	602	0	38	TJU_CMC_MD2.ID00641.3p-miR	Ago_12941		GRAMD1B
JHU_ID_03895	JHU_ID_03895.5p	JHU_ID_03895.3p	ugcaggugccccggaguagcugc	aggcgccccgggauagcugcagg	aggcgccccgggauagcugcaggugccccggaauagcugcaggugccccggaguagcugc	chr11:133361600-133361660	Bladderepithelium	DRR013035	614	611	3	0		Ago_12995		OPCML-IT1
JHU_ID_03909	JHU_ID_03909.5p	JHU_ID_03909.3p	uccgggacaggcacugcuguuuu	aacgucggcgcucuuccccucua	uccgggacaggcacugcuguuuuccagcuugguuggaacgucggcgcucuuccccucua	chr11:134261215-134261274	Blood	SRR2201551	142	118	0	24		Ago_13003		ACAD8
JHU_ID_03917	JHU_ID_03917.3p	JHU_ID_03917.5p	ucuggcugaggaggaagugga	ggcuuccuccacagccaccuc	ggcuuccuccacagccaccuccggagggaucuggcugaggaggaagugga	chr11:13463158-13463208	Adult skin fibroblast	SRR2960040	909	906	0	3		Ago_12000		BTBD10
JHU_ID_03938	JHU_ID_03938.5p	JHU_ID_03938.3p	uucagugucuggugagggucc	cacugaccacgucacuggaucug	cacugaccacgucacuggaucugauuagccagauucagugucuggugagggucc	chr11:1477615-1477669	Colon adenocarcinoma	SRR1917329	4131	3737	0	394	TJU_CMC_MD2.ID00480.3p-miR	Ago_11871		MOB2
JHU_ID_03955	JHU_ID_03955.3p	JHU_ID_03955.5p	caucaccugggacucugcccacagg	uguggggagagguaaaggggugug	uguggggagagguaaaggggugugacacuggcaggucacaucaccugggacucugcccacagg	chr11:16790914-16790977	Neuron Dopaminergic	SRR5127234	1740	1738	0	2		Ago_12013		PLEKHA7
JHU_ID_03960	JHU_ID_03960.3p	JHU_ID_03960.5p	ugggaggaacaaguaugca	gcugccuugcuccucgucac	gcugccuugcuccucgucacucugauugucuugcagugggaggaacaaguaugca	chr11:16962965-16963020	Bladder	DRR013040	2456	2442	0	14		Ago_12016
JHU_ID_03967	JHU_ID_03967.5p	JHU_ID_03967.3p	aggagggacguggcgcucugag	aggagggccgaagcuguggagccugg	aggagggccgaagcuguggagccuggugggaggcugagccaggagggacguggcgcucugag	chr11:17276521-17276583	Colon adenocarcinoma	SRR1917329	7501	7482	0	19		Ago_12019
JHU_ID_03979	JHU_ID_03979.3p	JHU_ID_03979.5p	uagacaaucuguguagagugcu	uguucuacacagauaaucuguu	uguucuacacagauaaucuguuauuaaugagagaauagaauagacaaucuguguagagugcu	chr11:18004708-18004770	Colon adenocarcinoma	SRR1917329	1116	1089	1	26		Ago_12033		RP1-59M18.2
JHU_ID_04099	JHU_ID_04099.5p	JHU_ID_04099.3p	auggggcauuggaagugguggucu	caccccacuauccuugccccucc	auggggcauuggaagugguggucucccaacuaaaaccaccccacuauccuugccccucc	chr11:31800148-31800207	Astrocytes	SRR5127214	66	56	0	10	TJU_CMC_MD2.ID00511.5p-miR	Ago_12092		PAX6
JHU_ID_04163	JHU_ID_04163.5p	JHU_ID_04163.3p	agcacaaaguuucugagcgccu	ugcgcucggagcuuugacuugag	ugcgcucggagcuuugacuugagaauccauauccuucguucagcacaaaguuucugagcgccu	chr11:3841759-3841822	T cell leukemia	SRR1304307	393	266	0	127	TJU_CMC_MD2.ID00490.5p-miR	Ago_11925
JHU_ID_04189	JHU_ID_04189.5p	JHU_ID_04189.3p	uauauauguuguguauguauacg	uauauauacacauauacauauauaug	uauauauacacauauacauauauauguugugaauauucuaagcauauauauguuguguauguauacg	chr11:44233138-44233205	Neuron Cortical	SRR5127209	561	502	7	52		Ago_12159		EXT2
JHU_ID_04244	JHU_ID_04244.5p	JHU_ID_04244.3p	uacugaguugcaguaggguauca	cugcugucugcuucucagggac	uacugaguugcaguaggguaucagcuucugaugcuaaugugucugauuccugcugucugcuucucagggac	chr11:47275832-47275903	Macrophage	SRR1532974	132	126	1	5	TJU_CMC_MD2.ID00526.5p-miR	Ago_12196
JHU_ID_04264	JHU_ID_04264.5p	JHU_ID_04264.3p	caggagguagagauggaggauga	caccuccagaaucaccuccaccc	caccuccagaaucaccuccacccccuccuccaccaccuccuccugcggaagauggugagauccaggagguagagauggaggauga	chr11:47724552-47724637	BladderEpithelium	DRR013036	250	239	8	3	TJU_CMC_MD2.ID00529.3p-miR	Ago_12203		FNBP4
JHU_ID_04295	JHU_ID_04295.5p	JHU_ID_04295.3p	agggaugcucugagguccugcu	caggaccucugugcuuucaccuc	caggaccucugugcuuucaccucuguguccuuacaccuggagggaugcucugagguccugcu	chr11:57408800-57408862	Melanoma	SRR1913138	249	219	0	30	TJU_CMC_MD2.ID00532.3p-miR	Ago_12219		SLC43A3
JHU_ID_04312	JHU_ID_04312.5p	JHU_ID_04312.3p	ccuggacuucuuauuuuggcu	caaaaauaggaaguccaaggacu	ccuggacuucuuauuuuggcucuugagcugccugagcaaaaauaggaaguccaaggacu	chr11:58504615-58504674	T cell leukemia	SRR1304307	413	289	0	124	TJU_CMC_MD2.ID00533.3p-miR	Ago_12234		RP11-655C2.3
JHU_ID_04411	JHU_ID_04411.5p	JHU_ID_04411.3p	uaaaccuaggucgcgcucggggu	caccgcgcccggccugguuucgc	caccgcgcccggccugguuucgcguuugauguguuaaaccuaggucgcgcucggggu	chr11:62840859-62840916	Colon adenocarcinoma	SRR1917336	179	177	0	2		Ago_12302		WDR74
JHU_ID_04470	JHU_ID_04470.5p	JHU_ID_04470.3p	cggggcugcccugaacgggccc	gcccgcuccccgcugcccccua	cggggcugcccugaacgggcccggcucuggugcgcuugcucagccaggcccgcuccccgcugcccccua	chr11:64314931-64315000	Lung cancer	SRR1013984	3249	3234	0	15		Ago_12337
JHU_ID_04485	JHU_ID_04485.5p	JHU_ID_04485.3p	uggagggugaggaguggcuauc	aggccacuccucaugcccccagu	uggagggugaggaguggcuaucagugaggggagaggccagcaaggugcugaggccacuccucaugcccccagu	chr11:64739808-64739881	Platelet	SRR1592249	1797	1787	0	10	TJU_CMC_MD2.ID00550.3p-miR	Ago_12344		RASGRP2
JHU_ID_04777	JHU_ID_04777.5p	JHU_ID_04777.3p	uggggccugggugugguguguca	acacaagccccuguccugcu	acacaagccccuguccugcugcaguccgagucugagucccagcuggggccugggugugguguguca	chr11:72684744-72684810	Platelet	SRR1592249	571	543	22	6		Ago_12628
JHU_ID_04780	JHU_ID_04780.5p	JHU_ID_04780.3p	ucccccggcgccucucugccagg	uguaagccaaggagcuggggcauugggg	uguaagccaaggagcuggggcauuggggcaggcagugccguuggcugaugcugucucccccggcgccucucugccagg	chr11:72698105-72698183	Macrophage	SRR1532975	535	529	3	3	TJU_CMC_MD2.ID00589.3p-miR	Ago_12630
JHU_ID_04818	JHU_ID_04818.5p	JHU_ID_04818.3p	ugggaacugaggggcuuuacu	aaaaguccuugcaguuuccucu	aaaaguccuugcaguuuccucuuacugaacugaaagaggugggaacugaggggcuuuacu	chr11:74748608-74748668	BrainCerebellum	SRR553573	125	96	0	29		Ago_12648			MIR4696
JHU_ID_05041	JHU_ID_05041.3p	JHU_ID_05041.5p	uaggucacuggggucagagcc	cucugacgccaguguccuaug	cucugacgccaguguccuauguucauagcauaggucacuggggucagagcc	chr12:107747325-107747376	Cervical cancer	SRR1304304	1525	1513	0	12	TJU_CMC_MD2.ID00750.3p-miR	Ago_13699		RP11-864J10.4
JHU_ID_05076	JHU_ID_05076.5p	JHU_ID_05076.3p	cccuggcauucucccauccugcc	aggaugggaggaggcaaggagg	aggaugggaggaggcaaggagguguccaguccuuugugcaucuauccccuggcauucucccauccugcc	chr12:11001479-11001548	Colon adenocarcinoma	SRR1917329	123	113	0	10		Ago_13130
JHU_ID_05093	JHU_ID_05093.5p	JHU_ID_05093.3p	cuggccaggaacuuuugggaugg	cucccucucuuccuggccccag	cuggccaggaacuuuugggauggggacaccaccucucagcccucccucucuuccuggccccag	chr12:111341717-111341780	BrainPrefrontalCortex	ERR409900	1095	800	0	295	TJU_CMC_MD2.ID00757.5p-miR	Ago_13748
JHU_ID_05168	JHU_ID_05168.5p	JHU_ID_05168.3p	agagcucguguagaaagcccuug	augggcuuucuagauggacuuuc	augggcuuucuagauggacuuucaaguccaaguagaaguccaacuugagagcucguguagaaagcccuug	chr12:11810255-11810325	Macrophage	SRR1532975	218	185	0	33		Ago_13135		ETV6
JHU_ID_05209	JHU_ID_05209.5p	JHU_ID_05209.3p	aggacagcgagaggcagcucugg	aggguacccucucguugcagca	aggacagcgagaggcagcucuggggcuguguccugacuccagcuaacccaggguacccucucguugcagca	chr12:121004490-121004561	Astrocytes	SRR5127214	558	384	0	174	TJU_CMC_MD2.ID00772.3p-miR	Ago_13862		C12orf43
JHU_ID_05248	JHU_ID_05248.5p	JHU_ID_05248.3p	ugacaagccaggcuucuggucu	cccagaaaucugguaugccagca	cccagaaaucugguaugccagcaaagagaguaagaacuucugacaagccaggcuucuggucu	chr12:122695923-122695985	Dendritic	SRR1708921	1101	943	20	138		Ago_13890		RP11-324E6.6
JHU_ID_05249	JHU_ID_05249.5p	JHU_ID_05249.3p	ugacaagccaggcuucuggucu	cccagaaaucugguaugccagca	cccagaaaucugguaugccagcaaagagaguaagaacuucugacaagccaggcuucuggucu	chr12:122709348-122709410	Dendritic	SRR1708921	1120	954	21	145		Ago_13892
JHU_ID_05300	JHU_ID_05300.5p	JHU_ID_05300.3p	cccccuuucccugagccugcau	ccaggcucagggaaacugagac	ccaggcucagggaaacugagacaguggacaagcauugagcccccuuucccugagccugcau	chr12:124437441-124437502	Astrocytes	SRR5127214	632	577	1	54	TJU_CMC_MD2.ID00785.3p-miR	Ago_13928		NCOR2	MIR6880
JHU_ID_05314	JHU_ID_05314.5p	JHU_ID_05314.3p	ugguucgaucccggguuucggcac	gcauagacgaagccgauuccuuccaau	ugguucgaucccggguuucggcacuuccucuuuuuccuuccccccgggggaaaaaggaggugcauagacgaagccgauuccuuccaau	chr12:124927777-124927865	Bladder	DRR013044	8536	8522	3	11		Ago_13944			MIR5188
JHU_ID_05451	JHU_ID_05451.5p	JHU_ID_05451.3p	cgaggacccccccugccugg	aggaggaggagguccugugag	cgaggacccccccugccuggccuucgagucuggagggaggccaggaggaggagguccugugag	chr12:1805175-1805238	Red Blood Cell	SRR1664894	451	447	0	4	TJU_CMC_MD2.ID00660.5p-miR	Ago_13022		CACNA2D4
JHU_ID_05469	JHU_ID_05469.5p	JHU_ID_05469.3p	aagaguuacuagaacuauuca	aauaguuuuaguaacucuuga	aagaguuacuagaacuauucaaccuucagcuguguugaauaguuuuaguaacucuuga	chr12:21518669-21518727	Neuron Cortical	SRR5127209	109	84	0	25	TJU_CMC_MD2.ID00683.3p-miR	Ago_13184
JHU_ID_05498	JHU_ID_05498.5p	JHU_ID_05498.3p	ucccuuuucugguaguucuca	aggaauuaccugggaaugggaagu	aggaauuaccugggaaugggaaguuguuuuguuuuuuagcuuuucccuuuucugguaguucuca	chr12:26804109-26804173	Colon adenocarcinoma	SRR1917329	8126	7564	13	549	TJU_CMC_MD2.ID00685.3p-miR	Ago_13211
JHU_ID_05514	JHU_ID_05514.5p	JHU_ID_05514.3p	aagaagauaaggaugguugac	aaccauccuuaccuucuu	aagaagauaaggaugguugacugacucaaccauccuuaccuucuu	chr12:28127352-28127397	Bladder	DRR013041	717	702	0	15		Ago_13216
JHU_ID_05519	JHU_ID_05519.5p	JHU_ID_05519.3p	aacguacuaagaauaaauuucu	uuuauucuugguagguuguaca	uuuauucuugguagguuguacauuccuaaacauguacaacguacuaagaauaaauuucu	chr12:29263653-29263712	Colon adenocarcinoma	SRR1917336	227	202	0	25		Ago_13225
JHU_ID_05614	JHU_ID_05614.5p	JHU_ID_05614.3p	agauucucaggcucuaccccaga	caggggaggccugggauucugu	agauucucaggcucuaccccagaauugagucagaaucuucaggggaggccugggauucugu	chr12:4725466-4725527	Neuron Cortical	SRR5127209	203	150	0	53		Ago_13060		GALNT8
JHU_ID_05742	JHU_ID_05742.5p	JHU_ID_05742.3p	ugggcuguggugccgugaccuuu	agcaccaccguggccucuc	ugggcuguggugccgugaccuuugguguuagaguaagaacaccaaagcaccaccguggccucuc	chr12:53463161-53463225	Colon adenocarcinoma	SRR1917329	811	808	1	2		Ago_13390		PCBP2
JHU_ID_05764	JHU_ID_05764.5p	JHU_ID_05764.3p	uggagggagggaggaagggc	cccuccuccugggcccucccagg	uggagggagggaggaagggccuuauuggacugaaucugaaggccccuccuccugggcccucccagg	chr12:54409351-54409417	Bladderepithelium	DRR013035	154	140	4	10		Ago_13408		ITGA5
JHU_ID_05800	JHU_ID_05800.5p	JHU_ID_05800.3p	uuccuguccuuuuuccagaggguu	cccuggggcagggaugggcuug	uuccuguccuuuuuccagaggguuuaaucuucugacccuggggcagggaugggcuug	chr12:56480077-56480134	Neuron Dopaminergic	SRR5127234	214	198	0	16	TJU_CMC_MD2.ID00708.5p-miR	Ago_13436		GLS2
JHU_ID_05871	JHU_ID_05871.3p	JHU_ID_05871.5p	cucaccggcccgcguccccgcagc	ggcgcgggaugcggggcgggg	ggcgcgggaugcggggcggggccugggguugccgcccgaggcucaccggcccgcguccccgcagc	chr12:6329621-6329686	Biliosphere	ERR842904	1287	1282	0	5	TJU_CMC_MD2.ID00664.3p-miR	Ago_13078		TNFRSF1A
JHU_ID_05922	JHU_ID_05922.3p	JHU_ID_05922.5p	ucugacccucugcuucccccagg	aaggggaagaggggcaugugggg	aaggggaagaggggcauguggggcaggggguuggguauugccucugacccucugcuucccccagg	chr12:6856241-6856306	Neuron iPSC	SRR1777169	546	545	0	1		Ago_13096		USP5
JHU_ID_06147	JHU_ID_06147.5p	JHU_ID_06147.3p	uuucccucauuggcuucugc	gcagaagcaccugagggagucug	uuucccucauuggcuucugcccaccccccaggaugggggcagaagcaccugagggagucug	chr13:112766638-112766699	Lung Adenocarcinoma	SRR1013967	367	365	0	2		Ago_14399
JHU_ID_06237	JHU_ID_06237.5p	JHU_ID_06237.3p	caaccacuaaacugcuuccugu	aggaagcaguuuaguggcugcc	aggaagcaguuuaguggcugccuggggcugaggcaaccacuaaacugcuuccugu	chr13:21399978-21400033	Colon adenocarcinoma	SRR1917336	237	236	0	1	TJU_CMC_MD2.ID00804.3p-miR	Ago_14060
JHU_ID_06266	JHU_ID_06266.5p	JHU_ID_06266.3p	augugccuaguggcugcugucu	agaguagccacuagccacaugu	agaguagccacuagccacaugucaguucaugcuuuuaaggcuauaugugccuaguggcugcugucu	chr13:26685334-26685400	Neuron Dopaminergic	SRR5127234	4872	4115	0	757	TJU_CMC_MD2.ID00806.5p-miR	Ago_14076
JHU_ID_06295	JHU_ID_06295.3p	JHU_ID_06295.5p	cccgcggcuccuguucgaccccc	gaggcuggacgggagccggcgaggcggc	gaggcuggacgggagccggcgaggcggcccucgaggccccgcggcuccuguucgaccccc	chr13:31200616-31200676	Lung Adenocarcinoma	SRR1013979	52	51	0	1		Ago_14106		B3GLCT
JHU_ID_06322	JHU_ID_06322.5p	JHU_ID_06322.3p	uuccccccaaaauucauaauguu	cauaugaauuuuuggggggau	uuccccccaaaauucauaauguugaaguccucaccuuuagcauaugaauuuuuggggggau	chr13:34963450-34963511	Neuron Cortical	SRR5127209	500	336	0	164	TJU_CMC_MD2.ID00815.5p-miR	Ago_14120		NBEA
JHU_ID_06386	JHU_ID_06386.5p	JHU_ID_06386.3p	acugagcuggggggcaggguggaa	ccgccgugcccccuggcucuggugc	ccgccgugcccccuggcucuggugcccacgcagccagcaagcacugagcuggggggcaggguggaa	chr13:50124770-50124836	Astrocytes	SRR5127214	82	76	0	6	TJU_CMC_MD2.ID00822.5p-miR	Ago_14183
JHU_ID_06423	JHU_ID_06423.3p	JHU_ID_06423.5p	agcgacccucugagcccgg	gggcggaagcggcgcucg	gggcggaagcggcgcucgcaggcgcugaaagcgagcgacccucugagcccgg	chr13:67230634-67230686	Neuroblastoma	SRR1304311	75	74	0	1		Ago_14244
JHU_ID_06434	JHU_ID_06434.5p	JHU_ID_06434.3p	uuaauccucaagccuguacaacc	gugugcaggcuugaggauuaggug	uuaauccucaagccuguacaaccaggacagagcauguggaaaggugugcaggcuugaggauuaggug	chr13:75779130-75779197	Lung Adenocarcinoma	SRR1304309	674	646	0	28		Ago_14262
JHU_ID_06443	JHU_ID_06443.3p	JHU_ID_06443.5p	uuagugacucagaauauucuca	agaacauucugagucacuaacu	agaacauucugagucacuaacucagauucuaacaauccgaguuagugacucagaauauucuca	chr13:78182891-78182954	Fibroblast Lung	SRR1988286	276	260	0	16		Ago_14266
JHU_ID_06454	JHU_ID_06454.5p	JHU_ID_06454.3p	uaggcacauuaggaacuuuugu	ugaaaguuccuaauguggcua	ugaaaguuccuaauguggcuaucuaguguauuccuaacauaggcacauuaggaacuuuugu	chr13:81349469-81349530	Lung Adenocarcinoma	SRR1013979	140	135	0	5		Ago_14280
JHU_ID_06467	JHU_ID_06467.5p	JHU_ID_06467.3p	caaaucagacuccuccaauccu	gauuggaggggucugauuuguu	gauuggaggggucugauuuguugaggagaggggaauaaacaaaucagacuccuccaauccu	chr13:93764201-93764262	Cervical cancer	SRR1304304	519	428	0	91	TJU_CMC_MD2.ID00838.3p-miR	Ago_14304		GPC6
JHU_ID_06470	JHU_ID_06470.3p	JHU_ID_06470.5p	cggcugggagccgaggcgucggug	ccccgccucccccagcugcc	ccccgccucccccagcugccgacguggggcgggcagccgccggcggcugggagccgaggcgucggug	chr13:94601844-94601911	Colon adenocarcinoma	SRR1917329	73	72	0	1	TJU_CMC_MD2.ID00839.3p-miR	Ago_14308
JHU_ID_06540	JHU_ID_06540.5p	JHU_ID_06540.3p	uaugucugcggaccacccacc	ucgguggaccucagaacaugugc	ucgguggaccucagaacaugugcugaauucgugccauaugucugcggaccacccacc	chr14:101039852-101039909	Neuron iPSC	SRR1777169	278	201	0	77	TJU_CMC_MD2.ID00937.5p-miR	Ago_14955			MIR376C
JHU_ID_06592	JHU_ID_06592.5p	JHU_ID_06592.3p	ucguagcagcauaguaggugccu	ugucaccugcguaugcugccacc	ugucaccugcguaugcugccaccaggugggugcugaagccauccucguagcagcauaguaggugccu	chr14:103539613-103539680	Retina	ERR973613	164	159	0	5		Ago_15011
JHU_ID_06621	JHU_ID_06621.3p	JHU_ID_06621.5p	cugggcuuguggggaccccugg	agggauccccagacagccccgagcu	agggauccccagacagccccgagcucugcuagcugggcuuguggggaccccugg	chr14:104680722-104680776	Colon adenocarcinoma	SRR1917329	497	489	0	8	TJU_CMC_MD2.ID00954.3p-miR	Ago_15026			MIR4710
JHU_ID_06628	JHU_ID_06628.3p	JHU_ID_06628.5p	ugccugggugugcccugacc	ccugggcacauggggcucc	ccugggcacauggggcucccugccugggugugcccugacc	chr14:104703240-104703280	Colon adenocarcinoma	SRR1917329	666	662	0	4	TJU_CMC_MD2.ID00955.3p-miR	Ago_15031
JHU_ID_06690	JHU_ID_06690.5p	JHU_ID_06690.3p	ccaccgaugccuuguuccugagc	ccagggcaggcgcuuguggaa	ccaccgaugccuuguuccugagccuuugcugggagucggccagggcaggcgcuuguggaa	chr14:105446608-105446668	Neuron iPSC	SRR1777166	142	130	0	12		Ago_15058		MTA1
JHU_ID_06754	JHU_ID_06754.5p	JHU_ID_06754.3p	ugggcaggagaugccguggacccc	ggggcccggcggaugccuc	ugggcaggagaugccguggaccccgcccuucggggaggggcccggcggaugccuc	chr14:20343183-20343238	Epithelium Colonic Epithelium (flow)	SRR5127219	32135	32109	7	19	TJU_CMC_MD2.ID00858.5p-miR	Ago_14448		RPPH1
JHU_ID_06791	JHU_ID_06791.5p	JHU_ID_06791.3p	agguccgcagcugcucugccu	acagagcagcuguuggaucccc	acagagcagcuguuggauccccaccaagugucuggagguccgcagcugcucugccu	chr14:22978184-22978240	Myoblast Skeletal Muscle	SRR5127218	1700	1569	0	131		Ago_14467		AJUBA
JHU_ID_06860	JHU_ID_06860.3p	JHU_ID_06860.5p	guagagagaaauuugaaggaa	cuuucaaaucucccucucuccuc	cuuucaaaucucccucucuccucucucucucucucuaggguagagagaaauuugaaggaa	chr14:26717786-26717846	Breast adenocarcinoma	SRR873382	163	162	0	1		Ago_14501		NOVA1-AS1
JHU_ID_06870	JHU_ID_06870.5p	JHU_ID_06870.3p	cuugagaaucggaaggcccagc	ugggccuuccgacucccaaggc	ugggccuuccgacucccaaggcccuaaauggagucagagccuugagaaucggaaggcccagc	chr14:31965556-31965618	Hepatocellular carcinoma (HepG2)	ERR738405	1389	1359	6	24	TJU_CMC_MD2.ID00871.3p-miR	Ago_14533
JHU_ID_06871	JHU_ID_06871.3p	JHU_ID_06871.5p	cucgcguccccgcucccuccucc	ggagggagggggacgagcgcgcgg	ggagggagggggacgagcgcgcggggccgcguccucgcucgcguccccgcucccuccucc	chr14:32076763-32076823	Macrophage	SRR1532975	409	396	0	13	TJU_CMC_MD2.ID00872.3p-miR	Ago_14536		ARHGAP5-AS1
JHU_ID_06906	JHU_ID_06906.3p	JHU_ID_06906.5p	uguagugcaaucagucaggaga	acuccugacugauuacauuaca	acuccugacugauuacauuacauauugauauuagugagcaucaguauguagugcaaucagucaggaga	chr14:36021567-36021635	T cell leukemia	SRR1304307	339	248	0	91		Ago_14567
JHU_ID_06920	JHU_ID_06920.3p	JHU_ID_06920.5p	ucuaucuuuuguauacuagga	cuaguauacaaaagauagacauau	cuaguauacaaaagauagacauauauguagcaacacgugucuaucuuuuguauacuagga	chr14:41581831-41581891	Neuron Cortical	SRR5127209	106	98	0	8		Ago_14586
JHU_ID_07003	JHU_ID_07003.5p	JHU_ID_07003.3p	ucucuggucuggaagauuccuc	ggaaucuucuagacuggaag	ucucuggucuggaagauuccucagucuggaggaggaaucuucuagacuggaag	chr14:60036401-60036454	Colon adenocarcinoma	SRR1917329	1773	1739	0	34	TJU_CMC_MD2.ID00888.5p-miR	Ago_14666		RP11-16B13.1
JHU_ID_07072	JHU_ID_07072.5p	JHU_ID_07072.3p	cugccucaaacauaaaaacucc	aguuuucauguuugaggcacag	cugccucaaacauaaaaacuccugucaccuggaguuuucauguuugaggcacag	chr14:69694670-69694724	Dendritic	SRR1708915	99	87	0	12	TJU_CMC_MD2.ID00902.5p-miR	Ago_14739
JHU_ID_07077	JHU_ID_07077.3p	JHU_ID_07077.5p	agccgccuccaccaagccugga	caagccugagagaggcagcucg	caagccugagagaggcagcucguuugcuuucugguucuccgagccgccuccaccaagccugga	chr14:69982919-69982982	BladderEpithelium	DRR013036	221	186	0	35		Ago_14744		SMOC1
JHU_ID_07173	JHU_ID_07173.5p	JHU_ID_07173.3p	uuucaggaggcaaguagguauug	aaacuuccuggccuccugacuu	uuucaggaggcaaguagguauugacaguucccaaggucaaacuuccuggccuccugacuu	chr14:79102377-79102437	Lung cancer	SRR1013983	903	822	0	81		Ago_14817
JHU_ID_07176	JHU_ID_07176.5p	JHU_ID_07176.3p	acuguccuacuugugccuauca	auagucacaaguaagagagug	acuguccuacuugugccuaucacaaguaaguacuugauagucacaaguaagagagug	chr14:80538044-80538101	Colon adenocarcinoma	SRR1917329	241	199	0	42		Ago_14822		CEP128
JHU_ID_07293	JHU_ID_07293.5p	JHU_ID_07293.3p	uugcucugcucucccuuguacu	ugcagaggagacaaagcaagc	ugcagaggagacaaagcaagccucaucaggcccauugcuugcucugcucucccuuguacu	chr14:95533806-95533866	Lung Adenocarcinoma	SRR1013979	8873	8842	0	31	TJU_CMC_MD2.ID00928.3p-miR	Ago_14909
JHU_ID_07413	JHU_ID_07413.3p	JHU_ID_07413.5p	gugcacgugaggauggcucuga	gcugucauccucagguggauucc	gcugucauccucagguggauuccuucccuccaggugcacgugaggauggcucuga	chr15:25705932-25705987	Lung Adenocarcinoma	SRR1013968	375	370	0	5		Ago_15110		ATP10A
JHU_ID_07543	JHU_ID_07543.5p	JHU_ID_07543.3p	ccccagcuggaggccuucucccc	ggugggggcuuuuccuggcugcaggau	ccccagcuggaggccuucuccccaggcucacuauggggugggggcuuuuccuggcugcaggau	chr15:41568818-41568881	BrainPrefrontalCortex	ERR409883	278	262	0	16	TJU_CMC_MD2.ID00984.5p-miR	Ago_15215		TYRO3
JHU_ID_07564	JHU_ID_07564.5p	JHU_ID_07564.3p	ucaguccagucaucucccuuc	agguagaugccugggcucaga	agguagaugccugggcucagaacgcgaaccucaguccagucaucucccuuc	chr15:42732688-42732739	Colon adenocarcinoma	SRR1917329	322	296	0	26	TJU_CMC_MD2.ID00988.3p-miR	Ago_15235
JHU_ID_07647	JHU_ID_07647.3p	JHU_ID_07647.5p	cucggccuuugcucgcagcacucg	ucugugcugcgagcggcgcgagc	ucugugcugcgagcggcgcgagccucuggcagcgggcucggccuuugcucgcagcacucg	chr15:56365282-56365342	Lung Adenocarcinoma	SRR1013979	8917	8899	0	18	TJU_CMC_MD2.ID01004.3p-miR	Ago_15296
JHU_ID_07708	JHU_ID_07708.5p	JHU_ID_07708.3p	cucagcugccaggccuguccu	gagaggccuuggagaccugagg	gagaggccuuggagaccugagggguaugucugagucucccucagcugccaggccuguccu	chr15:63346463-63346523	Lung non-small cell cancer	SRR1013971	407	391	0	16		Ago_15340		CA12
JHU_ID_07719	JHU_ID_07719.5p	JHU_ID_07719.3p	ugugguaauauagaaauugaag	ucagcuucuauauuaccgcagc	ugugguaauauagaaauugaagauauagucuauaucuucagcuucuauauuaccgcagc	chr15:64343751-64343810	Colon adenocarcinoma	SRR1917329	82	73	0	9	TJU_CMC_MD2.ID01015.3p-miR	Ago_15350		CTD-2116N17.1
JHU_ID_07850	JHU_ID_07850.5p	JHU_ID_07850.3p	ccugagauccccaucugaccccu	aggucagauggggaccucaggug	ccugagauccccaucugaccccucacacugagcugagaggucagauggggaccucaggug	chr15:74199665-74199725	Cervical cancer	SRR1532966	84	82	0	2	TJU_CMC_MD2.ID01031.5p-miR	Ago_15463		STRA6
JHU_ID_07913	JHU_ID_07913.5p	JHU_ID_07913.3p	guguggggagcacgugaggcugg	agccaagugguccccacaaac	guguggggagcacgugaggcugggucagcuaugagcucagccaagugguccccacaaac	chr15:76194072-76194131	Breast adenocarcinoma	SRR873383	1376	1242	0	134	TJU_CMC_MD2.ID01038.3p-miR	Ago_15502
JHU_ID_08013	JHU_ID_08013.5p	JHU_ID_08013.3p	uuuccuaaucacauauugcuuc	agcaaugugugauuaggaaa	uuuccuaaucacauauugcuucugaaguguggaaggggaagcaaugugugauuaggaaa	chr15:85154531-85154590	Colon adenocarcinoma	SRR1917329	194	179	0	15		Ago_15594
JHU_ID_08035	JHU_ID_08035.5p	JHU_ID_08035.3p	uguaggcugauguugauacuggag	uccagguuacuuagccuagcucu	uguaggcugauguugauacuggagaaagcauuaccaggccuccagguuacuuagccuagcucu	chr15:89320313-89320376	Colon adenocarcinoma	SRR1917329	744	743	0	1		Ago_15612		POLG
JHU_ID_08199	JHU_ID_08199.5p	JHU_ID_08199.3p	gauagacaggaggcgagaccc	gucucgccuccugucuauc	gauagacaggaggcgagacccauucccauuugggucucgccuccugucuauc	chr16:13202052-13202104	Lung cancer	SRR1013984	187	179	0	8		Ago_15941		AC009134.1
JHU_ID_08392	JHU_ID_08392.5p	JHU_ID_08392.3p	accagggcuggccugaggccaag	agccucucgucaagccugggagc	agccucucgucaagccugggagcgggcagugcaccagggcuggccugaggccaag	chr16:21520779-21520834	H9 Differentiated Midbrain	SRR1988302	227	208	1	18		Ago_16013			MIR3680-1
JHU_ID_08399	JHU_ID_08399.5p	JHU_ID_08399.3p	aggggcgugagugggcggggcg	ccccgaccaggacacgcccacgu	aggggcgugagugggcggggcgggucuggccacgcccaccccgaccaggacacgcccacgu	chr16:2178664-2178725	Bladderepithelium	DRR013035	81	59	3	19	TJU_CMC_MD2.ID01097.3p-miR	Ago_15804		CASKIN1
JHU_ID_08409	JHU_ID_08409.5p	JHU_ID_08409.3p	uggaggggagggggcuggcugu	gcugggcccccuccccuccagc	uggaggggagggggcuggcugugccucacgcugggcccccuccccuccagc	chr16:22324453-22324504	B Cell Centroblast	SRR060981	126	123	0	3		Ago_16024		POLR3E
JHU_ID_08423	JHU_ID_08423.3p	JHU_ID_08423.5p	cggccucguacucgcgcgugc	gcggucgggugagaggccgcg	gcggucgggugagaggccgcggcggcaggugagugagcgcggccucguacucgcgcgugc	chr16:234830-234890	Lung Adenocarcinoma	SRR1013980	203	198	3	2	TJU_CMC_MD2.ID01068.3p-miR	Ago_15727		ITFG3
JHU_ID_08495	JHU_ID_08495.3p	JHU_ID_08495.5p	gaugcccucgcccucccuagu	ggggggggaagcgggggcagacag	ggggggggaagcgggggcagacagaggacagcucugaugcccucgcccucccuagu	chr16:282560-282616	Astrocytes	SRR5127214	161	160	0	1	TJU_CMC_MD2.ID01070.3p-miR	Ago_15728		ARHGDIG
JHU_ID_08558	JHU_ID_08558.5p	JHU_ID_08558.3p	accagggcuggccugaggccaag	agccucucgucaagccugggagc	agccucucgucaagccugggagcgggcagugcaccagggcuggccugaggccaag	chr16:29614047-29614102	H9 Differentiated Midbrain	SRR1988302	225	209	1	15		Ago_16097			MIR3680-2
JHU_ID_08634	JHU_ID_08634.5p	JHU_ID_08634.3p	ccugggcgcagggaugggagug	ccucucaucuggcugcccag	ccugggcgcagggaugggaguggccaggagugcugaccucucaucuggcugcccag	chr16:30946674-30946730	Breast adenocarcinoma	SRR873383	82	77	0	5		Ago_16140		FBXL19
JHU_ID_08655	JHU_ID_08655.5p	JHU_ID_08655.3p	ggcagaggcaggauaagaacug	gcucuuacccuccccuuacccucc	ggcagaggcaggauaagaacugcggaugaggccgagcgcagcucuuacccuccccuuacccucc	chr16:31372289-31372353	Dendritic	SRR1708910	445	382	13	50		Ago_16150		ITGAX
JHU_ID_08663	JHU_ID_08663.5p	JHU_ID_08663.3p	ucggggaccgagccugaagccuc	uccgcuucaggucgguccagguc	ucggggaccgagccugaagccucaacuaccagucgcguugcuccgcuucaggucgguccagguc	chr16:3172171-3172235	Lung Adenocarcinoma	SRR1304309	454	438	2	14	TJU_CMC_MD2.ID01109.5p-miR	Ago_15840
JHU_ID_08804	JHU_ID_08804.5p	JHU_ID_08804.3p	acuggcaaaaggguuuagaacuu	aguucuuccucugugccauagg	acuggcaaaaggguuuagaacuugacugcccuauaaagaguucuuccucugugccauagg	chr16:50796265-50796325	T cell leukemia	SRR1304307	418	410	0	8	TJU_CMC_MD2.ID01161.5p-miR	Ago_16209		RP11-327F22.4
JHU_ID_08858	JHU_ID_08858.5p	JHU_ID_08858.3p	aagcccagauuugugacuaugc	auagugaccuuucuggacuugu	auagugaccuuucuggacuuguaggugugaacguauuuaaagcccagauuugugacuaugc	chr16:57432362-57432423	Colon adenocarcinoma	SRR1917329	329	241	0	88	TJU_CMC_MD2.ID01165.3p-miR	Ago_16251		CIAPIN1
JHU_ID_08866	JHU_ID_08866.5p	JHU_ID_08866.3p	agccccgugcuguccccuccucag	uuuggggguggacacaguggggu	uuuggggguggacacagugggguccuggaggacuggacuugauuggagccccgugcuguccccuccucag	chr16:57656444-57656514	Biliosphere	ERR842905	802	721	6	75		Ago_16256
JHU_ID_08868	JHU_ID_08868.5p	JHU_ID_08868.3p	uagcucuguccuugggaaucgc	gguucccuugccaggagcuggg	uagcucuguccuugggaaucgcagggagcaggagcgguucccuugccaggagcuggg	chr16:57736459-57736516	Cervical cancer	SRR1304304	988	987	0	1		Ago_16258		KATNB1
JHU_ID_08983	JHU_ID_08983.5p	JHU_ID_08983.3p	caccucugagccccggacuccg	gaguccgggggcuuggcgguggu	gaguccgggggcuuggcgguggugcgaggcucaggggucggcccuggcuccaccucugagccccggacuccg	chr16:67666283-67666355	Lung cancer	SRR1013984	213	211	0	2	TJU_CMC_MD2.ID01172.3p-miR	Ago_16311		ENKD1
JHU_ID_08996	JHU_ID_08996.3p	JHU_ID_08996.5p	ugcggucccucccucuccucagg	ugagcagcggggagggacggggagc	ugagcagcggggagggacggggagcuggaggggagccgagaguaucgagcaggcacugaagcugcggucccucccucuccucagg	chr16:67936311-67936396	Macrophage	SRR1532975	365	354	8	3	TJU_CMC_MD2.ID01173.3p-miR	Ago_16322		PSMB10
JHU_ID_08998	JHU_ID_08998.3p	JHU_ID_08998.5p	cacccagcugagccgcucaccc	gugggaggguugggcugggcauggg	gugggaggguugggcugggcaugggccacggcugcccccacagagcccacccagcugagccgcucaccc	chr16:67957814-67957883	Hepatocellular carcinoma (HepG2)	ERR738403	392	391	0	1	TJU_CMC_MD2.ID01175.3p-miR	Ago_16326		SLC12A4
JHU_ID_09128	JHU_ID_09128.5p	JHU_ID_09128.3p	acucuuuaaggauagggcuga	agccguaucagugaagaguga	agccguaucagugaagagugaagcacugcacucuuuaaggauagggcuga	chr16:78380505-78380555	Colon adenocarcinoma	SRR1917329	242	232	0	10	TJU_CMC_MD2.ID01188.5p-miR	Ago_16430
JHU_ID_09148	JHU_ID_09148.5p	JHU_ID_09148.3p	gcgaaggcuggucagggagac	uaucccagggccagucuccacu	uaucccagggccagucuccacuucacucuugggaaggcgaaggcuggucagggagac	chr16:81478132-81478189	Lung Adenocarcinoma	SRR1304309	278	164	0	114	TJU_CMC_MD2.ID01191.5p-miR	Ago_16460
JHU_ID_09153	JHU_ID_09153.5p	JHU_ID_09153.3p	ugugcacuguacacauacaugu	gugugugugugaaugugugcaca	gugugugugugaaugugugcacauggguaugcaaaugcaugugugcacuguacacauacaugu	chr16:81672378-81672441	Neuron Dopaminergic	SRR5127234	159	158	0	1	TJU_CMC_MD2.ID01193.3p-miR	Ago_16466
JHU_ID_09174	JHU_ID_09174.5p	JHU_ID_09174.3p	ugagguucagccaggagga	ccauagcugugcuucagu	ugagguucagccaggaggaggggugauguuugagaggcccucccauagcugugcuucagu	chr16:83970444-83970504	Breast adenocarcinoma	SRR873383	333	262	0	71	TJU_CMC_MD2.ID01194.5p-miR	Ago_16475		NECAB2
JHU_ID_09214	JHU_ID_09214.5p	JHU_ID_09214.3p	agcugguccaaugccuggga	ucccaggcacuagcaugaccagc	ucccaggcacuagcaugaccagcuccgaaaaaagagccggagcugguccaaugccuggga	chr16:85473881-85473941	Breast adenocarcinoma	SRR873383	127	111	0	16	TJU_CMC_MD2.ID01198.5p-miR	Ago_16509
JHU_ID_09265	JHU_ID_09265.5p	JHU_ID_09265.3p	agugacagaagagacucugu	cggagucuugcucugucaccc	agugacagaagagacucuguuuguuuuuuuuucuccugagacggagucuugcucugucaccc	chr16:87463799-87463861	Cervical cancer	SRR1304304	336	309	0	27		Ago_16534		ZCCHC14
JHU_ID_09273	JHU_ID_09273.5p	JHU_ID_09273.3p	aguggagagucagaaaugggg	ccauuucugacccuugacucc	ccauuucugacccuugacuccuccuguccagggcugggaguggagagucagaaaugggg	chr16:87778257-87778316	T cell leukemia	SRR1292461	71	51	0	20		Ago_16544		RP4-536B24.4
JHU_ID_09285	JHU_ID_09285.5p	JHU_ID_09285.3p	ugcucgcugggccgcggcucccg	cgcagcugcgggcggcgggcggc	cgcagcugcgggcggcgggcggcgcgcacacugcucgcugggccgcggcucccg	chr16:87869452-87869506	Cervical cancer	SRR1304304	474	468	0	6		Ago_16547
JHU_ID_09336	JHU_ID_09336.5p	JHU_ID_09336.3p	ucggccgugaugccucacaccc	ggugagggugucugagccca	ucggccgugaugccucacacccaagugcugccucgagcaugcgucuccugggugagggugucugagccca	chr16:88731319-88731389	Cervical cancer	SRR1304304	683	615	0	68	TJU_CMC_MD2.ID01208.3p-miR	Ago_16573		RP5-1142A6.2
JHU_ID_09337	JHU_ID_09337.3p	JHU_ID_09337.5p	cggcugcccccugacccuugcc	gaagggcuggugggcggcuggg	gaagggcuggugggcggcugggcgggcgaguacccggcugcccccugacccuugcc	chr16:88732543-88732599	Breast ductal carcinoma	ERR372263	223	222	0	1	TJU_CMC_MD2.ID01209.3p-miR	Ago_16575		RP5-1142A6.2
JHU_ID_09421	JHU_ID_09421.5p	JHU_ID_09421.3p	ccucggagaagggucagggcuc	cuucugccccuucuccagcgc	cuucugccccuucuccagcgcugaccaccucacaggccucggagaagggucagggcuc	chr16:9282025-9282083	Lung Adenocarcinoma	SRR1013980	86	77	0	9		Ago_15908
JHU_ID_09478	JHU_ID_09478.5p	JHU_ID_09478.3p	caaccccgggcugaucacuacugcu	uaguguccgugccgggugccugc	uaguguccgugccgggugccugcggggaaugggaguggcaaccccgggcugaucacuacugcu	chr17:1471154-1471217	Neuroblastoma	SRR1304311	4955	4943	2	10	TJU_CMC_MD2.ID01230.3p-miR	Ago_16675		MYO1C
JHU_ID_09534	JHU_ID_09534.5p	JHU_ID_09534.3p	ucagggccugcucccaccccgcag	uggggugggaggggugaugagc	uggggugggaggggugaugagccccuguuaucugaggagcucagggccugcucccaccccgcag	chr17:1730316-1730380	Macrophage	SRR1532975	501	447	16	38	TJU_CMC_MD2.ID01233.3p-miR	Ago_16682		RP11-961A15.1
JHU_ID_09545	JHU_ID_09545.5p	JHU_ID_09545.3p	aggcggcgcgcaucucugggccu	agucccagcguugcggccggcgcu	agucccagcguugcggccggcgcuugcggguuaccgggccaggcggcgcgcaucucugggccu	chr17:17694899-17694962	Colon adenocarcinoma	SRR1917329	2132	2103	7	22	TJU_CMC_MD2.ID01267.3p-miR	Ago_16889		RAI1
JHU_ID_09562	JHU_ID_09562.5p	JHU_ID_09562.3p	ucccggcccggagccgccaagg	cgggcggcacccggccugggacg	cgggcggcacccggccugggacgcguagaggcgcacgugucccggcccggagccgccaagg	chr17:17836432-17836493	Adrenal	SRR944034	529	519	0	10	TJU_CMC_MD2.ID01270.3p-miR	Ago_16899		SREBF1	MIR33B
JHU_ID_09580	JHU_ID_09580.3p	JHU_ID_09580.5p	ucccggugacggcgagcgugg	gccgccgccgcccggagcg	gccgccgccgcccggagcggacguuucacgagucacgucccggugacggcgagcgugg	chr17:18183046-18183104	Colon adenocarcinoma	SRR1917329	771	765	0	6	TJU_CMC_MD2.ID01271.3p-miR	Ago_16902		RP11-258F1.1
JHU_ID_09648	JHU_ID_09648.5p	JHU_ID_09648.3p	cuugcaagagcgaggaggggcu	ccuccccucucuccuugcaugga	cuugcaagagcgaggaggggcuuggucuuugcugagccuccccucucuccuugcaugga	chr17:19742214-19742273	Lung Adenocarcinoma	SRR1304309	113	104	1	8		Ago_16948		ALDH3A1
JHU_ID_09734	JHU_ID_09734.5p	JHU_ID_09734.3p	uggguugcaggguaggugaca	gcaccuacugcacuaagga	gcaccuacugcacuaaggaguucgucuuugacaccauccaggugaggccuucccugaacuguggguugcaggguaggugaca	chr17:28748383-28748465	B Cell_naive	SRR060985	58	51	0	7		Ago_17010
JHU_ID_09767	JHU_ID_09767.3p	JHU_ID_09767.5p	gcugggcggcuugcuggggcucg	accccccgccgccgccgcccc	accccccgccgccgccgccccuuguugcagagcuugggcugggcggcuugcuggggcucg	chr17:29390835-29390895	Lung Adenocarcinoma	SRR1304309	183	176	0	7		Ago_17040		TAOK1	MIR4523
JHU_ID_09771	JHU_ID_09771.3p	JHU_ID_09771.5p	cuucccuuccugaagggccagc	gggucauucaggaaggagacaguc	gggucauucaggaaggagacagucucuggaaucagucacuucccuuccugaagggccagc	chr17:29592453-29592513	Cervical cancer	SRR1304304	172	146	0	26		Ago_17045
JHU_ID_09778	JHU_ID_09778.5p	JHU_ID_09778.3p	ucaggcagcuguucccuccuug	aggagggaggaguuccugagg	aggagggaggaguuccugagggcucccuugcuccccugcccucaggcagcuguucccuccuug	chr17:3032753-3032816	Colon adenocarcinoma	SRR1917329	122	115	0	7	TJU_CMC_MD2.ID01239.3p-miR	Ago_16708
JHU_ID_09898	JHU_ID_09898.5p	JHU_ID_09898.3p	ccagccccacgcguccccaugc	ggcggggcgugugcggcugc	ggcggggcgugugcggcugcuggugcucgucccccagccccacgcguccccaugc	chr17:38604598-38604653	Hepatocellular carcinoma (HepG2)	ERR738403	926	892	0	34	TJU_CMC_MD2.ID01298.5p-miR	Ago_17136
JHU_ID_09915	JHU_ID_09915.5p	JHU_ID_09915.3p	ccuggccuguuuuaacccugug	caggguuuugcagaccgggucu	ccuggccuguuuuaacccugugcauucuggccaaugagaaaccccaggguuuugcagaccgggucu	chr17:38887032-38887098	Colon adenocarcinoma	SRR1917329	1290	843	0	447	TJU_CMC_MD2.ID01301.3p-miR	Ago_17150		LASP1
JHU_ID_09949	JHU_ID_09949.5p	JHU_ID_09949.3p	cuuccuccuggcugggccugccc	gcacaggcucccaggaggagggu	gcacaggcucccaggaggagggugaaccaagcccagcuuccuccuggcugggccugccc	chr17:39675179-39675238	Cervical cancer	SRR1532965	150	141	0	9		Ago_17176		PGAP3
JHU_ID_09983	JHU_ID_09983.3p	JHU_ID_09983.5p	acccaagcauccucugcacccag	ggugccgagugcucagaguggguuc	ggugccgagugcucagaguggguucggguucagucccugaacccaagcauccucugcacccag	chr17:40354239-40354302	Macrophage	SRR1532975	137	135	0	2		Ago_17201
JHU_ID_10048	JHU_ID_10048.5p	JHU_ID_10048.3p	ucugggguaggguggcagcgucc	ucccgccucccauccccaggcg	ucugggguaggguggcagcguccccuugaagaugcggucccgccucccauccccaggcg	chr17:43135832-43135891	B cell lymphoblastoid	SRR1304313	93	88	0	5		Ago_17241
JHU_ID_10070	JHU_ID_10070.3p	JHU_ID_10070.5p	aaagggaccagggaacaucugcu	cagguguccccugguccccuuuc	cagguguccccugguccccuuuccucaccccaauccaggaaaagggaccagggaacaucugcu	chr17:44111847-44111910	Platelet	SRR1592244	85	84	0	1		Ago_17265		HDAC5
JHU_ID_10080	JHU_ID_10080.5p	JHU_ID_10080.3p	cggccggggagaacugcgccugc	aagcgcgggcuccuccgccagc	cggccggggagaacugcgccugccggcuccgagaagcgcgggcuccuccgccagc	chr17:44219190-44219245	Red Blood Cell	SRR5127232	196	188	0	8	TJU_CMC_MD2.ID01322.5p-miR	Ago_17272		UBTF	MIR6782
JHU_ID_10098	JHU_ID_10098.5p	JHU_ID_10098.3p	uggggccagcuuuggaagccu	gauccagggcugcugcccgca	gauccagggcugcugcccgcaguggcuaacagugauguggggccagcuuuggaagccu	chr17:443798-443856	CD4+ T Cell	SRR1532971	183	181	0	2		Ago_16648		FAM101B
JHU_ID_10147	JHU_ID_10147.5p	JHU_ID_10147.3p	acaugcgcccucggcuucuggc	cagaaggcggaggcgacuagggugu	cagaaggcggaggcgacuaggguguugguggaaccacacaugcgcccucggcuucuggc	chr17:45317345-45317404	T cell leukemia	SRR1304307	668	662	0	6	TJU_CMC_MD2.ID01337.3p-miR	Ago_17308
JHU_ID_10224	JHU_ID_10224.3p	JHU_ID_10224.5p	ucuccggucggcgcugggacga	agccccgcgccgacggacucagg	agccccgcgccgacggacucaggacaggccuccucuccggucggcgcugggacga	chr17:48037460-48037515	Colon adenocarcinoma	SRR1917330	68	67	0	1		Ago_17344		COPZ2	MIR152
JHU_ID_10248	JHU_ID_10248.5p	JHU_ID_10248.3p	gcgacugccucccugcugugagc	cccgacagggagguggccggg	gcgacugccucccugcugugagcaggagaacaggaagucugcccgacagggagguggccggg	chr17:48642604-48642666	Colon adenocarcinoma	SRR1917336	7553	6883	20	650	TJU_CMC_MD2.ID01351.3p-miR	Ago_17362		RP11-357H14.17
JHU_ID_10299	JHU_ID_10299.5p	JHU_ID_10299.3p	cggcagccgccgcucgggcaa	ucccccagcggcggcugcgaga	ucccccagcggcggcugcgagaagggcagccgcucggucuccggcagccgccgcucgggcaa	chr17:50151071-50151133	Macrophage	SRR1532975	112	106	0	6		Ago_17385
JHU_ID_10454	JHU_ID_10454.3p	JHU_ID_10454.5p	cuuggccuguagcccgguccggu	guggccgggccaggccgagcg	guggccgggccaggccgagcggugacuccgaguugcuuggccuguagcccgguccggu	chr17:63773322-63773380	Astrocytes	SRR5127214	121	120	0	1		Ago_17543		CCDC47
JHU_ID_10527	JHU_ID_10527.5p	JHU_ID_10527.3p	ggggggccggcggcggcggc	ccccgccuccucgcccccccc	ccccgccuccucgccccccccggcccggggcgcuggugcuggggggggccggcggcggcggc	chr17:67825957-67826019	Epithelium Retinal Pigment	SRR493015	2096	2091	0	5	TJU_CMC_MD2.ID01377.3p-miR	Ago_17585		BPTF
JHU_ID_10567	JHU_ID_10567.5p	JHU_ID_10567.3p	uucuccugucuucucagcacc	ucaggcugagaggcaggggugaca	uucuccugucuucucagcacccccaggguuacauggcggucaggcugagaggcaggggugaca	chr17:72554799-72554862	Lung non-small cell cancer	SRR1013971	167	154	0	13		Ago_17617
JHU_ID_10576	JHU_ID_10576.5p	JHU_ID_10576.3p	gaggccauucggcucugaggucc	ccucaguccguauuggucucu	ccucaguccguauuggucucuauggcauccauagaggccauucggcucugaggucc	chr17:7306830-7306886	Cervical cancer	SRR1304304	2097	1648	0	449	TJU_CMC_MD2.ID01250.3p-miR	Ago_16773
JHU_ID_10728	JHU_ID_10728.3p	JHU_ID_10728.5p	ucuguguuccgcccacccaga	ccgggggggcggggcucagagc	ccgggggggcggggcucagagcugcugcuccucucugcugacccucuguguuccgcccacccaga	chr17:76905954-76906019	BrainPrefrontalCortex	ERR409900	1709	1699	1	9		Ago_17705		MGAT5B
JHU_ID_10766	JHU_ID_10766.5p	JHU_ID_10766.3p	gaagcagcgccugucgcaacucgcc	agaguugcugccgcugcugucc	agaguugcugccgcugcuguccucacacccgcucgugggaagcagcgccugucgcaacucgcc	chr17:78140754-78140817	Colon adenocarcinoma	SRR1917329	4530	4072	0	458	TJU_CMC_MD2.ID01415.5p-miR	Ago_17733		TMC8
JHU_ID_10776	JHU_ID_10776.5p	JHU_ID_10776.3p	ucggucccuaacccccuccggac	ccaggggagggaaggggagccgagg	ccaggggagggaaggggagccgaggucaacgcugcgccucggucccuaacccccuccggac	chr17:7835454-7835515	Cervical cancer	SRR1304304	3540	3532	0	8	TJU_CMC_MD2.ID01252.3p-miR	Ago_16787
JHU_ID_10787	JHU_ID_10787.5p	JHU_ID_10787.3p	acacccugcucggcccucccuucc	aagggaaagggucgauuggguccucg	aagggaaagggucgauuggguccucggucccuauccucugccucugccccgacacccugcucggcccucccuucc	chr17:7850944-7851019	Dendritic	SRR1708910	215	170	0	45		Ago_16790		KDM6B
JHU_ID_10812	JHU_ID_10812.3p	JHU_ID_10812.5p	uccgucccggccguuagcccagc	ggggcgagcgcgcgcggggcggaag	ggggcgagcgcgcgcggggcggaagucggccaccuuccuccgucccggccguuagcccagc	chr17:79009726-79009787	Colon adenocarcinoma	SRR1917335	101	100	0	1	TJU_CMC_MD2.ID01421.3p-miR	Ago_17754		CANT1
JHU_ID_10821	JHU_ID_10821.5p	JHU_ID_10821.3p	caccuccccugggcuugccc	gcggcggccuuggaggggagcc	caccuccccugggcuugcccagccagagagcuaugggcggcggccuuggaggggagcc	chr17:79221775-79221833	BrainPrefrontalCortex	ERR409900	122	119	0	3		Ago_17756
JHU_ID_10890	JHU_ID_10890.5p	JHU_ID_10890.3p	ucuggggcagugcuagcaccuga	uggcucuggcaguuggcuugugug	uggcucuggcaguuggcuugugugucacucagcaucuggggcagugcuagcaccuga	chr17:81163886-81163943	Cervical cancer	SRR1304304	137	136	0	1		Ago_17817
JHU_ID_10945	JHU_ID_10945.3p	JHU_ID_10945.5p	cagcagggagccaguguucugu	ugggcccugcucuuucugcuuug	ugggcccugcucuuucugcuuuggagcaguucuuccuucagcagggagccaguguucugu	chr17:81710235-81710295	Cervical cancer	SRR1304304	111	110	0	1		Ago_17848		RP13-1032I1.10
JHU_ID_10953	JHU_ID_10953.5p	JHU_ID_10953.3p	gcugugaagggcuggugcucuagg	cugggcaccuacuuccugccu	gcugugaagggcuggugcucuaggcgccuccguggcccccguugccugggcaccuacuuccugccu	chr17:81867174-81867240	Cervical cancer	SRR1304304	1715	1589	0	126	TJU_CMC_MD2.ID01438.3p-miR	Ago_17854
JHU_ID_10973	JHU_ID_10973.5p	JHU_ID_10973.3p	ugcgagccacuguacccagc	ugggcacgguggcucacgcc	ugcgagccacuguacccagccaagaaaaguuauuuuaggcugggcacgguggcucacgcc	chr17:82003124-82003184	Breast adenocarcinoma	SRR960732	110	105	0	5		Ago_17867		ASPSCR1
JHU_ID_11023	JHU_ID_11023.3p	JHU_ID_11023.5p	ugugccccgggucagacucugu	ugggucugcaccguuggcccgc	ugggucugcaccguuggcccgccugucucuugugugugugccccgggucagacucugu	chr17:82692482-82692540	Neuron Dopaminergic	SRR5127234	4067	4061	0	6		Ago_17910		RAB40B	MIR4525
JHU_ID_11068	JHU_ID_11068.5p	JHU_ID_11068.3p	gcagaggaguggcaugauggcag	ugccauccugcccuuccuga	gcagaggaguggcaugauggcagugucuggucauuucugccauccugcccuuccuga	chr18:10696576-10696633	BladderEpithelium	DRR013036	131	131	0	0		Ago_17997		PIEZO2
JHU_ID_11309	JHU_ID_11309.5p	JHU_ID_11309.3p	auauagauaucaucagagcugu	acagcucugaugaucucuaugu	acagcucugaugaucucuauguagaugccuauauaaauagcuauauagauaucaucagagcugu	chr18:58237708-58237772	Neuron Cortical	SRR5127209	193	128	0	65	TJU_CMC_MD2.ID01499.5p-miR	Ago_18202
JHU_ID_11358	JHU_ID_11358.3p	JHU_ID_11358.5p	ugauuaccugggaucuaguga	acuagaucauagguaaacacu	acuagaucauagguaaacacuacugaaugcuucagacgugauuaccugggaucuaguga	chr18:72788239-72788298	Prostate adenocarcinoma	SRR1810079	54	51	0	3		Ago_18250
JHU_ID_11370	JHU_ID_11370.5p	JHU_ID_11370.3p	agcccgggagggcugucuggg	cagaacggguucuucccaggccga	agcccgggagggcugucugggauuucuagagggucccagaacggguucuucccaggccga	chr18:74597481-74597541	Cervical cancer	SRR1304304	88	83	0	5	TJU_CMC_MD2.ID01506.3p-miR	Ago_18255		LINC00909
JHU_ID_11452	JHU_ID_11452.5p	JHU_ID_11452.3p	cgcggucgcgcugagucaca	ugacucagggcuggccgccuc	cgcggucgcgcugagucacagcccgcucagagcucagcgugacucagggcuggccgccuc	chr18:9017243-9017303	SkinDermis	SRR1259222	253	208	0	45	TJU_CMC_MD2.ID01475.5p-miR	Ago_17986
JHU_ID_11460	JHU_ID_11460.5p	JHU_ID_11460.3p	cuggaccacuuagcucccuggc	cagggaggugaaugguucugucu	cuggaccacuuagcucccuggcuucagcccuuuuuccagggaggugaaugguucugucu	chr18:980055-980114	Lung Adenocarcinoma	SRR1013979	339	235	0	104	TJU_CMC_MD2.ID01463.3p-miR	Ago_17939		RP11-78F17.1
JHU_ID_11515	JHU_ID_11515.5p	JHU_ID_11515.3p	uggcugugccaucccagggacc	gcccugcaccugacacagccucc	uggcugugccaucccagggaccauggggacuggccagcuggcccugcaccugacacagccucc	chr19:10815628-10815691	Platelet	SRR1592249	150	147	0	3	TJU_CMC_MD2.ID01607.3p-miR	Ago_18667		DNM2	MIR4748
JHU_ID_11516	JHU_ID_11516.5p	JHU_ID_11516.3p	uccccacccccgggcucccgcagg	agcgaggaggcgggagugggccgagg	agcgaggaggcgggagugggccgaggcugaugggccuccccacccccgggcucccgcagg	chr19:1081765-1081825	Platelet	SRR1592246	879	855	0	24	TJU_CMC_MD2.ID01528.3p-miR	Ago_18350		HMHA1
JHU_ID_11550	JHU_ID_11550.5p	JHU_ID_11550.3p	uuucucucucccucugggacc	acccaggggcagggagaaagu	acccaggggcagggagaaagugagauuuccugggcuuucucucucccucugggacc	chr19:11373655-11373711	Neuron Cortical	SRR5127209	73	67	0	6		Ago_18685		CTD-2342J14.6
JHU_ID_11595	JHU_ID_11595.5p	JHU_ID_11595.3p	ucacggcucgagcgggcgcgccu	gcgcgcccgagcugcugacu	gcgcgcccgagcugcugacucaccgcauccccgagcgcgcgcgggcgcagccggggacgccgcgucacgucacggcucgagcgggcgcgccu	chr19:1249080-1249172	Cervical cancer	SRR1304304	271	270	0	1		Ago_18368		MIDN
JHU_ID_11600	JHU_ID_11600.5p	JHU_ID_11600.3p	ucagaaccgaccgccucccagcu	gggguggcggagguuucugaga	gggguggcggagguuucugagaagugacauaggcugggaugacucagaaccgaccgccucccagcu	chr19:1253359-1253425	Hepatocellular carcinoma (HepG2)	ERR738413	1832	1782	0	50	TJU_CMC_MD2.ID01534.3p-miR	Ago_18371		MIDN
JHU_ID_11613	JHU_ID_11613.5p	JHU_ID_11613.3p	uuggggcuggagguauccacaca	cguggcgcccccggucuccaggg	cguggcgcccccggucuccagggccgcuuucccggccuuggggcuggagguauccacaca	chr19:1269748-1269808	Cervical cancer	SRR1304304	562	561	0	1	TJU_CMC_MD2.ID01535.3p-miR	Ago_18374		CIRBP-AS1
JHU_ID_11614	JHU_ID_11614.5p	JHU_ID_11614.3p	gggauguauucguacugucugaug	aagugauggagagcaaua	aagugauggagagcaauacccggggaugacugugaccacauugggauguauucguacugucugaug	chr19:12703600-12703666	Testes	SRR333676	3776	2957	99	720	TJU_CMC_MD2.ID01613.3p-miR	Ago_18714		TNPO2
JHU_ID_11639	JHU_ID_11639.3p	JHU_ID_11639.5p	cuuccccacccucuccugcagc	uggggagaggaggggaccagggc	uggggagaggaggggaccagggcugugaauuaccuucccuuccccacccucuccugcagc	chr19:12952630-12952690	Adrenal	SRR944031	3726	3716	0	10	TJU_CMC_MD2.ID01620.3p-miR	Ago_18730		RAD23A
JHU_ID_11774	JHU_ID_11774.5p	JHU_ID_11774.3p	cuacugucacucucucguccccc	gggccgagaugagggcaguaugug	gggccgagaugagggcaguauguggacagacacugggcacuacugucacucucucguccccc	chr19:15464379-15464441	CD3+ T Cell Splenic	SRR5127200	146	143	0	3	TJU_CMC_MD2.ID01642.3p-miR	Ago_18815		RASAL3
JHU_ID_11791	JHU_ID_11791.5p	JHU_ID_11791.3p	ugggccuuucugucucugcagg	ugcaguggaugggagaggacacggc	ugcaguggaugggagaggacacggcugguggggaucgggcucagcugggccuuucugucucugcagg	chr19:16087961-16088028	Neuron iPSC	SRR1777169	829	820	4	5	TJU_CMC_MD2.ID01644.3p-miR	Ago_18819
JHU_ID_11848	JHU_ID_11848.5p	JHU_ID_11848.3p	ucuuggccucacccucucuagc	cccagggugggaugaggcuuggga	cccagggugggaugaggcuugggaaaaauagaagcagcccucuuggccucacccucucuagc	chr19:17778076-17778138	Dendritic	SRR1708920	588	558	0	30	TJU_CMC_MD2.ID01658.3p-miR	Ago_18861		FCHO1
JHU_ID_11876	JHU_ID_11876.5p	JHU_ID_11876.3p	gugugugcaccugugucugucugu	agacagacgcagguacacacaga	gugugugcaccugugucugucuguauucguguuguauagacagacgcagguacacacaga	chr19:18284683-18284743	Colon adenocarcinoma	SRR1917336	2552	2498	0	54	TJU_CMC_MD2.ID01664.5p-miR	Ago_18880			MIR3188
JHU_ID_11891	JHU_ID_11891.5p	JHU_ID_11891.3p	ugcugacugcccgccuugcccaca	cgggucaggcagggccagucaca	cgggucaggcagggccagucacagacacagcucugugcugacugcccgccuugcccaca	chr19:18436248-18436307	Dendritic	SRR1708908	280	270	0	10	TJU_CMC_MD2.ID01666.3p-miR	Ago_18885		ISYNA1
JHU_ID_11918	JHU_ID_11918.5p	JHU_ID_11918.3p	cgugucugccugugucuccagg	ugggggugacgggcaggcauggg	ugggggugacgggcaggcaugggggcuggaguggcugacccugccuccccgugucugccugugucuccagg	chr19:18900448-18900519	Colon adenocarcinoma	SRR1917336	640	623	1	16	TJU_CMC_MD2.ID01671.3p-miR	Ago_18903		COPE
JHU_ID_11929	JHU_ID_11929.5p	JHU_ID_11929.3p	ccucagaaacgcaccuguuccug	ggucaggauuguugcugggcc	ccucagaaacgcaccuguuccuguaaacagcaaccaggucaggauuguugcugggcc	chr19:19304899-19304956	Colon adenocarcinoma	SRR1917336	837	639	0	198	TJU_CMC_MD2.ID01674.3p-miR	Ago_18914		SUGP1
JHU_ID_12036	JHU_ID_12036.5p	JHU_ID_12036.3p	uccuggagcugggcagaugggaa	ccccggugcucuccuccagccug	uccuggagcugggcagaugggaacaguccauccccggugcucuccuccagccug	chr19:2762640-2762694	Bladder	DRR013040	833	828	0	5	TJU_CMC_MD2.ID01557.5p-miR	Ago_18459		SGTA
JHU_ID_12100	JHU_ID_12100.5p	JHU_ID_12100.3p	uaagcuacugugccuggccagu	uggccaguacagugacugaua	uaagcuacugugccuggccaguuucagucuuuuaaaauuuauuggccaguacagugacugaua	chr19:32700712-32700775	Cervical cancer	SRR1304304	357	317	0	40		Ago_18985		NUDT19
JHU_ID_12212	JHU_ID_12212.5p	JHU_ID_12212.3p	agcugguccgaguguuguggguua	gucccagcuacucaggaggcuga	gucccagcuacucaggaggcugagauggagcugguccgaguguuguggguua	chr19:36049118-36049170	Blood	SRR1949841	988	988	0	0		Ago_19037		THAP8
JHU_ID_12246	JHU_ID_12246.3p	JHU_ID_12246.5p	uuuacuguugcuacuauuacuagu	uaguaccuggcacauaguaaau	uaguaccuggcacauaguaaaugcugugucaauguuaaccauuuacuguugcuacuauuacuagu	chr19:38043624-38043689	Lung cancer	SRR1013983	7240	7204	7	29	TJU_CMC_MD2.ID01703.3p-miR	Ago_19070
JHU_ID_12293	JHU_ID_12293.5p	JHU_ID_12293.3p	aggcuggaacauggcagagggcau	gccugagucuccuguuccuucuug	gccugagucuccuguuccuucuugugcacgagccagcuggaggcuggaacauggcagagggcau	chr19:39378400-39378464	BrainFrontalcortex	SRR553572	304	297	0	7	TJU_CMC_MD2.ID01712.5p-miR	Ago_19114
JHU_ID_12306	JHU_ID_12306.5p	JHU_ID_12306.3p	gcguagagaucuggagga	ccccagacugcguuu	gcguagagaucuggaggaccagggcucagccugaccuuuucucgcucccuucccacccccagacugcguuu	chr19:39486335-39486406	BrainFrontal	SRR448331	369	358	4	7		Ago_19122		TIMM50
JHU_ID_12360	JHU_ID_12360.3p	JHU_ID_12360.5p	uggcugugccugggacuccgcc	uggagucccaggcacagggacc	uggagucccaggcacagggaccuuguuuugagaaguggcugugccugggacuccgcc	chr19:40689857-40689914	BrainPrefrontalCortex	ERR409883	240	238	0	2		Ago_19156		NUMBL
JHU_ID_12420	JHU_ID_12420.5p	JHU_ID_12420.3p	ucccucugugcucaccucccagc	agggagguguggggagaaggucc	agggagguguggggagaagguccgcuuuagagcuuggucccucugugcucaccucccagc	chr19:42333546-42333606	BrainPrefrontalCortex	ERR409900	1137	1122	0	15	TJU_CMC_MD2.ID01726.3p-miR	Ago_19198		MEGF8
JHU_ID_12446	JHU_ID_12446.3p	JHU_ID_12446.5p	uuuaaaguucuagaaccguga	aggauucuagaauccagaagg	aggauucuagaauccagaaggcuuuagaaucuugacaccuuuaaaguucuagaaccguga	chr19:43637855-43637915	Neuron iPSC	SRR1777169	2778	2764	5	9		Ago_19212		CADM4
JHU_ID_12478	JHU_ID_12478.5p	JHU_ID_12478.3p	cuggucuaaggagaggcuugggc	gcaggccucacuuggcaccagu	gcaggccucacuuggcaccagugcuguguggccucccuggucuaaggagaggcuugggc	chr19:44989377-44989436	Cervical cancer	SRR1304304	469	367	0	102	TJU_CMC_MD2.ID01731.5p-miR	Ago_19238		CLPTM1
JHU_ID_12574	JHU_ID_12574.5p	JHU_ID_12574.3p	cgcgggcccucggacccucaggg	gcgaggguucgagggcacga	cgcgggcccucggacccucagggaggcgaggguucgagggcacga	chr19:46830631-46830676	Retina	ERR973608	641	528	0	113		Ago_19299
JHU_ID_12609	JHU_ID_12609.5p	JHU_ID_12609.3p	cgggggagggaaggcuucugga	cacucgccuuucuucucccaguaugag	cgggggagggaaggcuucuggaggcaaaggccucucacucgccuuucuucucccaguaugag	chr19:47696395-47696457	Blood	SRR1949848	67	55	0	12		Ago_19324
JHU_ID_12701	JHU_ID_12701.5p	JHU_ID_12701.3p	uaaccugggcuugaacagugccu	gcaccguucaaacccagguuaua	uaaccugggcuugaacagugccuauuagacuagcaccguucaaacccagguuaua	chr19:50024601-50024656	Retina	ERR973604	257	251	0	6		Ago_19393		VRK3
JHU_ID_12756	JHU_ID_12756.3p	JHU_ID_12756.5p	uuacaagccucugagcccca	gggccugggcuuguaaaa	gggccugggcuuguaaaauaccagauuuuacaagccucugagcccca	chr19:51904440-51904487	B cell lymphoblastoid	SRR1304313	284	281	0	3	TJU_CMC_MD2.ID01761.3p-miR	Ago_19418		ZNF649
JHU_ID_12767	JHU_ID_12767.3p	JHU_ID_12767.5p	ccuccccggcgcucucugacgcu	gugaggcagcgcggggacgggc	gugaggcagcgcggggacgggcuggccugcccugggcuccuccccggcgcucucugacgcu	chr19:5240137-5240198	Neuron Dopaminergic	SRR5127234	7503	7489	1	13		Ago_18543		PTPRS
JHU_ID_12846	JHU_ID_12846.5p	JHU_ID_12846.3p	ugaggaggaucugaaggauugg	gaaaccuccacuuccuccucauc	ugaggaggaucugaaggauuggacucagguucgaaaccuccacuuccuccucauc	chr19:55225486-55225541	Hepatocellular carcinoma	SRR2085172	471	466	0	5	TJU_CMC_MD2.ID01772.3p-miR	Ago_19462
JHU_ID_12889	JHU_ID_12889.5p	JHU_ID_12889.3p	ucugaccccgcugugcacccacag	ggagggugcauggugucguuguggc	ggagggugcauggugucguuguggccgagccaggcuaccaagugaccucugaccccgcugugcacccacag	chr19:5696757-5696828	Lung Adenocarcinoma	SRR1013980	870	869	0	1	TJU_CMC_MD2.ID01580.3p-miR	Ago_18548		LONP1
JHU_ID_12893	JHU_ID_12893.5p	JHU_ID_12893.3p	uuaguggcucccucugccugca	caggugaggguggagccaccga	uuaguggcucccucugccugcagaauggaagaccacgugcaggugaggguggagccaccga	chr19:57439111-57439172	Colon adenocarcinoma	SRR1917329	17462	17446	0	16	TJU_CMC_MD2.ID01780.5p-miR	Ago_19504		AC004076.9
JHU_ID_12914	JHU_ID_12914.5p	JHU_ID_12914.3p	cacccggccccucgugccccagg	gguccugggggccggggug	gguccugggggccggggugggcaggggugacuuggagagagugacuugcgggggacacccucucacccggccccucgugccccagg	chr19:582429-582515	Retina	ERR973613	268	263	4	1	TJU_CMC_MD2.ID01515.3p-miR	Ago_18312		BSG
JHU_ID_12941	JHU_ID_12941.5p	JHU_ID_12941.3p	caucucccgccuccuuuucccgcc	cggggaaagggccgggaagggcg	caucucccgccuccuuuucccgccgacugagagggcggggaaagggccgggaagggcg	chr19:5978305-5978363	Astrocytes	SRR5127214	1277	1199	0	78	TJU_CMC_MD2.ID01581.5p-miR	Ago_18555
JHU_ID_12991	JHU_ID_12991.5p	JHU_ID_12991.3p	uaucugcuguuguccccucagg	agaggccgcacagcaggaacc	agaggccgcacagcaggaaccucacauuggauguaucugcuguuguccccucagg	chr19:7468771-7468826	Colon adenocarcinoma	SRR1917336	916	893	0	23	TJU_CMC_MD2.ID01587.5p-miR	Ago_18581		ARHGEF18
JHU_ID_13102	JHU_ID_13102.3p	JHU_ID_13102.5p	auuuuuucuggagauucuguuc	acaaaaucucugggaaaaaucu	acaaaaucucugggaaaaaucuggccaaaaagagauuuuuucuggagauucuguuc	chr2:103062591-103062647	Lung cancer	SRR1013984	529	524	0	5		Ago_2905
JHU_ID_13143	JHU_ID_13143.5p	JHU_ID_13143.3p	caacucaggggccaggcaccau	ggggccuggccccugagaugug	ggggccuggccccugagauguguagguuauacaucauacaacucaggggccaggcaccau	chr2:109253969-109254029	Stromal cell Prostate	SRR5127226	1649	1591	0	58	TJU_CMC_MD2.ID01886.3p-miR	Ago_2931		SH3RF3	MIR4265
JHU_ID_13165	JHU_ID_13165.5p	JHU_ID_13165.3p	uuguguccaguuguuggggga	ccucagccacugcugacaccagg	uuguguccaguuguugggggagauguguaagcuuggcucccucagccacugcugacaccagg	chr2:111135385-111135447	Colon adenocarcinoma	SRR1917329	537	533	2	2	TJU_CMC_MD2.ID01887.5p-miR	Ago_2952		BCL2L11
JHU_ID_13334	JHU_ID_13334.3p	JHU_ID_13334.5p	ucacucuggccccgccccgccc	gcuguggggaggggccaggggcccgca	gcuguggggaggggccaggggcccgcagggcugccugucacucuggccccgccccgccc	chr2:130391327-130391386	Platelet	SRR1592246	264	263	0	1		Ago_3090
JHU_ID_13337	JHU_ID_13337.3p	JHU_ID_13337.5p	cauggcaaccaccacccagggc	ucuaguggugcugguugccaugccu	ucuaguggugcugguugccaugccugcaagguuguccgcuucacauggcaaccaccacccagggc	chr2:130526872-130526937	Islet Alpha Cell	SRR1028924	290	267	0	23		Ago_3091		CFC1B
JHU_ID_13338	JHU_ID_13338.5p	JHU_ID_13338.3p	cauggcaaccaccacccagggc	ucuaguggugcugguugccaugccu	ucuaguggugcugguugccaugccugcaagguuguccgcuucacauggcaaccaccacccagggc	chr2:130593835-130593900	Islet Alpha Cell	SRR1028924	290	267	0	23		Ago_3092		CFC1
JHU_ID_13361	JHU_ID_13361.5p	JHU_ID_13361.3p	auucagcuacgaucaccagggc	ccuggugaugguagcugaauaa	auucagcuacgaucaccagggcauaucauagcugaaaggcccuggugaugguagcugaauaa	chr2:132913084-132913146	Lung squamous carcinoma	SRR1013975	512	510	0	2	TJU_CMC_MD2.ID01914.5p-miR	Ago_3114
JHU_ID_13368	JHU_ID_13368.3p	JHU_ID_13368.5p	acugaugugucuguacccuac	uaggguacagacacaucaguag	uaggguacagacacaucaguagauaauuauaaaauauaauuacugaugugucuguacccuac	chr2:134184680-134184742	Colon adenocarcinoma	SRR1917336	227	215	0	12		Ago_3123		MGAT5	MIR3679
JHU_ID_13373	JHU_ID_13373.5p	JHU_ID_13373.3p	aauagugucuagaauaucuuga	aagauauucuagacacuauucu	aagauauucuagacacuauucugugucacccagaauagugucuagaauaucuuga	chr2:135335273-135335328	Colon adenocarcinoma	SRR1917336	969	770	0	199		Ago_3130		ZRANB3
JHU_ID_13391	JHU_ID_13391.5p	JHU_ID_13391.3p	uucuucaagaucgggggcagagu	ucugcccccgaucuugaagaag	ucugcccccgaucuugaagaagauccaacuugcaggaucuucuucaagaucgggggcagagu	chr2:14263605-14263667	Breast adenocarcinoma	SRR960732	562	542	0	20		Ago_2255
JHU_ID_13438	JHU_ID_13438.5p	JHU_ID_13438.3p	uauaaauguaucacguuaggcc	aacgugauacauuuauguagca	aacgugauacauuuauguagcacuuauguaacguuuauugcuauauaaauguaucacguuaggcc	chr2:15592721-15592786	BrainPrefrontalCortex	ERR409900	78	69	0	9		Ago_2259		DDX1
JHU_ID_13494	JHU_ID_13494.3p	JHU_ID_13494.5p	cuugaacuugggacuaagccu	acuuaaucucaacuucaaguc	acuuaaucucaacuucaagucccggcuuagccaccuauuaagugacuugaacuugggacuaagccu	chr2:171409110-171409176	Cervical cancer	SRR1304304	733	731	0	2		Ago_3277		METTL8
JHU_ID_13496	JHU_ID_13496.5p	JHU_ID_13496.3p	augugaaauggaauauagaaa	uuucuauauucaguuucauaaau	augugaaauggaauauagaaaaguaggcaauucuuuacuuuucuauauucaguuucauaaau	chr2:171749330-171749392	Colon adenocarcinoma	SRR1917329	142	123	0	19		Ago_3280
JHU_ID_13518	JHU_ID_13518.5p	JHU_ID_13518.3p	uccucugagaaucuaaugcgc	aggcauuagauucucauaagg	aggcauuagauucucauaaggagcucgcaugcacaguucacuuuaggauucuugcuccucugagaaucuaaugcgc	chr2:174599999-174600075	B Cell_naive	SRR060985	405	298	0	107	TJU_CMC_MD2.ID01934.5p-miR	Ago_3308
JHU_ID_13525	JHU_ID_13525.5p	JHU_ID_13525.3p	caugucuggccugucccagug	cugggcccugccaggcuugccu	caugucuggccugucccaguggagacuuuaaggcccugggcccugccaggcuugccu	chr2:176101983-176102040	Cervical cancer	SRR1304304	155	147	0	8		Ago_3321
JHU_ID_13537	JHU_ID_13537.5p	JHU_ID_13537.3p	guccccagacucucccgggcugu	agcggggagaggucuggggaaag	guccccagacucucccgggcuguggcgaauaacuguaaagcggggagaggucuggggaaag	chr2:17753269-17753330	Cervical cancer	SRR1304304	5679	5657	2	20	TJU_CMC_MD2.ID01794.5p-miR	Ago_2266		SMC6
JHU_ID_13736	JHU_ID_13736.5p	JHU_ID_13736.3p	uagagaaccaucugaaagacu	uccuuucagaugguucucuaga	uccuuucagaugguucucuagagaaccaucucuagagaaccaucugaaagacu	chr2:218040991-218041044	B cell lymphoblastoid	SRR1304313	221	181	0	40	TJU_CMC_MD2.ID01963.3p-miR	Ago_3512
JHU_ID_13952	JHU_ID_13952.5p	JHU_ID_13952.3p	ucaccgcccuucccgcccgcgca	uggggcugcggggcgggcgggcgggu	uggggcugcggggcgggcgggcggguccgggagcgcgcugccggcucaccgcccuucccgcccgcgca	chr2:238239569-238239637	Neuron iPSC	SRR1777168	689	688	0	1	TJU_CMC_MD2.ID01995.3p-miR	Ago_3671		HES6
JHU_ID_14081	JHU_ID_14081.5p	JHU_ID_14081.3p	gacacggaggcucuguggaaccca	ggacacagagucucuguggaac	ggacacagagucucuguggaacccagggccuggccacauggaggacacggaggcucuguggaaccca	chr2:241812611-241812678	Hepatocellular carcinoma (HepG2)	ERR738405	3552	3552	0	0		Ago_3741		NEU4
JHU_ID_14179	JHU_ID_14179.3p	JHU_ID_14179.5p	uuucucuggccuuggaauccu	gauuccaaggccagaggaaag	gauuccaaggccagaggaaaggcccacccuuuucucuggccuuggaauccu	chr2:29287745-29287796	BrainPrefrontalCortex	ERR409883	1905	1899	0	6	TJU_CMC_MD2.ID01809.3p-miR	Ago_2385		ALK
JHU_ID_14181	JHU_ID_14181.3p	JHU_ID_14181.5p	uuccaggugcuguggauucacu	ugaaucuauagugcccggaaug	ugaaucuauagugcccggaaugugaugaugauuguggucauuguuccaggugcuguggauucacu	chr2:29496903-29496968	Neuroblastoma	SRR1304311	100	96	0	4		Ago_2386		ALK
JHU_ID_14183	JHU_ID_14183.5p	JHU_ID_14183.3p	agaagcuggaugucaggaagac	ccugcugcaucuaagcuuccac	agaagcuggaugucaggaagacugugcccuuccuugcaguccugcugcaucuaagcuuccac	chr2:29891804-29891866	Neuroblastoma	SRR1304311	158	156	0	2		Ago_2387		AC106870.1
JHU_ID_14224	JHU_ID_14224.5p	JHU_ID_14224.3p	ucggcugcaguuuccucccugu	agggaagaacggucggccuagagu	agggaagaacggucggccuagagucagaggagcugacucggcugcaguuuccucccugu	chr2:3536259-3536318	Colon adenocarcinoma	SRR1917324	705	703	0	2		Ago_2192		AC108488.4
JHU_ID_14267	JHU_ID_14267.3p	JHU_ID_14267.5p	auguuuguacuccggccgcugc	aguggccaaaguacaaacauuu	aguggccaaaguacaaacauuugcccugguucuuugagucucaggaaguugcacaggaaccagggcaaauguuuguacuccggccgcugc	chr2:42092538-42092628	Lung cancer	SRR1013984	561	559	0	2	TJU_CMC_MD2.ID01822.5p-miR	Ago_2431
JHU_ID_14276	JHU_ID_14276.5p	JHU_ID_14276.3p	ugaaggggcugugugcugucu	gcaggacagccacuuugguuuu	ugaaggggcugugugcugucugggaagccagauggcaggacagccacuuugguuuu	chr2:42953867-42953923	Colon adenocarcinoma	SRR1917329	455	450	0	5		Ago_2441
JHU_ID_14315	JHU_ID_14315.5p	JHU_ID_14315.3p	acagaaaccucuaaacccgaaa	uuggguuuagaggucucuguug	uuggguuuagaggucucuguugcugcccugggagcaacagaaaccucuaaacccgaaa	chr2:46269562-46269620	B cell lymphoblastoid	SRR1304313	75	68	0	7	TJU_CMC_MD2.ID01826.3p-miR	Ago_2478
JHU_ID_14338	JHU_ID_14338.5p	JHU_ID_14338.3p	ucgggccgcgcuguccuggcaa	ggacgcggugcggcuucug	ggacgcggugcggcuucugccguugcugcucgggccgcgcuguccuggcaa	chr2:47176884-47176935	Colon adenocarcinoma	SRR1917329	190	186	0	4		Ago_2499
JHU_ID_14360	JHU_ID_14360.5p	JHU_ID_14360.3p	uuggggcucuucacucuccagg	uagagagugaaugagccgcgcgg	uagagagugaaugagccgcgcgggcccgggacccuuggggcucuucacucuccagg	chr2:54557984-54558040	Colon adenocarcinoma	SRR1917329	211	195	0	16		Ago_2526
JHU_ID_14457	JHU_ID_14457.5p	JHU_ID_14457.3p	cuaucucaggaggccucccagu	agggagggugcugacugagucu	agggagggugcugacugagucuguuacauuuuauaaaggcuaucucaggaggccucccagu	chr2:69302093-69302154	Colon adenocarcinoma	SRR1917329	161	150	0	11		Ago_2621
JHU_ID_14479	JHU_ID_14479.5p	JHU_ID_14479.3p	cuggaauucuguaucugagcag	ugcucagauauagaacuccaga	cuggaauucuguaucugagcagcucucuccugucugcucagauauagaacuccaga	chr2:70856838-70856894	Retina	ERR973611	378	237	0	141	TJU_CMC_MD2.ID01844.5p-miR	Ago_2638
JHU_ID_14480	JHU_ID_14480.5p	JHU_ID_14480.3p	ccagagccugaaguccgcugcc	aaggggacuccggggucuugcc	aaggggacuccggggucuugcccucagcccgaccccaggccgcggccagagccugaaguccgcugcc	chr2:70901764-70901831	Cervical cancer	SRR1304304	262	260	0	2		Ago_2640		VAX2
JHU_ID_14546	JHU_ID_14546.5p	JHU_ID_14546.3p	ugaauucugauuuuccacuguu	aggauggaaaagaugaauucau	aggauggaaaagaugaauucaucaacagcacuggguaugaauucugauuuuccacuguu	chr2:76187725-76187784	Melanoma	SRR1913138	258	130	0	128		Ago_2703
JHU_ID_14586	JHU_ID_14586.3p	JHU_ID_14586.5p	agcccucugugcugugcucugc	agagaaacaguugcagugggugg	agagaaacaguugcaguggguggucgugggcauuuucagagagcccucugugcugugcucugc	chr2:85399411-85399474	Macrophage	SRR1532975	66	60	0	6		Ago_2746		CAPG
JHU_ID_14640	JHU_ID_14640.5p	JHU_ID_14640.3p	ccucuccgccaccuccaccgcg	cggcggaggcggcgguggcggca	cggcggaggcggcgguggcggcagcgguuguuccugccucuccgccaccuccaccgcg	chr2:88055699-88055757	Platelet	SRR1592246	591	566	0	25	TJU_CMC_MD2.ID01859.5p-miR	Ago_2794		KRCC1
JHU_ID_14741	JHU_ID_14741.5p	JHU_ID_14741.3p	gcugagacuggggagaguagca	ccccucucucauguccagggg	gcugagacuggggagaguagcagggcccucugccugacagcccugccccucucucauguccagggg	chr2:98565577-98565643	B Cell_Pre-germinal center	SRR060983	259	256	0	3		Ago_2863		INPP4A
JHU_ID_14975	JHU_ID_14975.5p	JHU_ID_14975.3p	cuggguagaggugaggauggg	cagacucagaaccuggaa	cagacucagaaccuggaacaagggauccucugaaccaagagggggugggggcuggguagaggugaggauggg	chr20:34852305-34852377	Bladder	DRR013041	172	169	0	3	TJU_CMC_MD2.ID02054.3p-miR	Ago_19782		GGT7
JHU_ID_14988	JHU_ID_14988.5p	JHU_ID_14988.3p	uaaauuaucugagccccaggaa	uggggcucagauaauuuacau	uggggcucagauaauuuacauguaauuaucuaauguaaauuaucugagccccaggaa	chr20:35039888-35039945	Epithelium Colonic Epithelium (flow)	SRR5127219	472	454	0	18		Ago_19792
JHU_ID_15001	JHU_ID_15001.5p	JHU_ID_15001.3p	agaaaugguagaaugacaggcc	ggucuucauucuaccagacu	ggucuucauucuaccagacuuugcugucggaagagagaaaugguagaaugacaggcc	chr20:36050267-36050324	BrainPrefrontalCortex	SRR1759219	132	131	0	1		Ago_19817		LINC00657
JHU_ID_15037	JHU_ID_15037.5p	JHU_ID_15037.3p	ugugguggcucgcaucuguggu	cacagaugggagccaccacacc	ugugguggcucgcaucugugguccuagugacuagcuguggaccacagaugggagccaccacacc	chr20:37177082-37177146	Adrenal	SRR944031	189	165	8	16	TJU_CMC_MD2.ID02059.3p-miR	Ago_19835		MROH8
JHU_ID_15181	JHU_ID_15181.5p	JHU_ID_15181.3p	cagccccccucggagaagcuc	gcuucuccaggcgguggcaacg	gcuucuccaggcgguggcaacggccgcaaggcugcagccccccucggagaagcuc	chr20:4687163-4687218	Macrophage	SRR1532975	823	818	0	5	TJU_CMC_MD2.ID02028.3p-miR	Ago_19599		PRNP
JHU_ID_15366	JHU_ID_15366.5p	JHU_ID_15366.3p	ucgccggggagccaagcaccgcu	ggggcuggcuucccgcuugca	ucgccggggagccaagcaccgcugugcuccugcuccuucagcggggcuggcuucccgcuugca	chr20:61253902-61253965	T cell leukemia	SRR1292461	257	253	1	3		Ago_20045		CDH4
JHU_ID_15371	JHU_ID_15371.3p	JHU_ID_15371.5p	ugugagaguauguucgcaucu	gugugaacauguuuucacacg	gugugaacauguuuucacacgugcacauguaugcacaugcgugugagaguauguucgcaucu	chr20:61554776-61554838	Immort. Mammary Epi	SRR433867	258	246	0	12		Ago_20054
JHU_ID_15381	JHU_ID_15381.5p	JHU_ID_15381.3p	ucgcucuuugucucggcucgcu	cgggccgaggcgggcgcgggg	cgggccgaggcgggcgcggggcggcgacggggccucgcucuuugucucggcucgcu	chr20:62066203-62066259	Colon adenocarcinoma	SRR1917336	323	320	0	3	TJU_CMC_MD2.ID02097.3p-miR	Ago_20062			MIR3195
JHU_ID_15454	JHU_ID_15454.5p	JHU_ID_15454.3p	agcagcggcucccgccgggacug	gggccggggcgagccgggcaagc	agcagcggcucccgccgggacugguaauuacgcucggggccgggccggggcgagccgggcaagc	chr20:63177862-63177926	Retina	ERR973603	906	888	2	16	TJU_CMC_MD2.ID02109.5p-miR	Ago_20101		RP5-963E22.4
JHU_ID_15474	JHU_ID_15474.5p	JHU_ID_15474.3p	caccuuccugcccucaggcugc	agcucugaggguugggaaggcagc	agcucugaggguugggaaggcagcgccugcagcccucaccuuccugcccucaggcugc	chr20:63537680-63537738	T cell leukemia	SRR1304307	140	136	0	4	TJU_CMC_MD2.ID02111.3p-miR	Ago_20117
JHU_ID_15485	JHU_ID_15485.5p	JHU_ID_15485.3p	cugggguaaggcggucugguga	gccaggugaguuacagcaggg	gccaggugaguuacagcaggguggggcugggguaaggcggucugguga	chr20:63689644-63689692	Astrocytes	SRR5127214	67	66	0	1		Ago_20128		RTEL1-TNFRSF6B
JHU_ID_15598	JHU_ID_15598.5p	JHU_ID_15598.3p	uggcuguggguuccuuaucugu	agauaauggacccacaaccagg	uggcuguggguuccuuaucuguucacaaucccgagacgaaagacaauauuaggagcagauaauggacccacaaccagg	chr21:32523613-32523691	Endothelial Coronary (0529)	SRR5127228	246	235	0	11	TJU_CMC_MD2.ID02136.3p-miR	Ago_20400
JHU_ID_15602	JHU_ID_15602.5p	JHU_ID_15602.3p	ucaggaucaggaucugcagag	cugcagauccugguccuagua	ucaggaucaggaucugcagaguuauuaguauagugcucugcagauccugguccuagua	chr21:32730987-32731045	Lung	SRR1608284	359	355	0	4	TJU_CMC_MD2.ID02138.5p-miR	Ago_20402		AP000279.1
JHU_ID_15671	JHU_ID_15671.5p	JHU_ID_15671.3p	ugaucugguggaacucugaga	ucagaguuccaccagaucaau	ugaucugguggaacucugagaauuucuggauugaaguucucagaguuccaccagaucaau	chr21:40563375-40563435	Retina	ERR973612	128	123	0	5	TJU_CMC_MD2.ID02147.5p-miR	Ago_20475
JHU_ID_15850	JHU_ID_15850.5p	JHU_ID_15850.3p	cccuccucaggacucccccuc	gguggaagugugcuggggagcaggu	gguggaagugugcuggggagcagguggcauucucuccgucaagccccuccucaggacucccccuc	chr21:46387581-46387646	Cervical cancer	SRR1304304	160	141	0	19		Ago_20588
JHU_ID_15934	JHU_ID_15934.5p	JHU_ID_15934.3p	ccucggacccguccccccgacc	cgcgggggagacgggucggggcg	ccucggacccguccccccgaccuccgcgggggagacgggucggggcg	chr21:8213634-8213681	H9 ESC	SRR1988290	9376	8969	295	112		Ago_20193		RNA5-8S5
JHU_ID_15936	JHU_ID_15936.5p	JHU_ID_15936.3p	gcggcggcggcggggguguguggg	cgccccccccccacgccucc	gcggcggcggcgggggugugugggguccucccccgccccccccccacgccucc	chr21:8216038-8216091	Adult skin fibroblast	SRR2960040	438	424	0	14		Ago_20197		RNA5-8S5
JHU_ID_15969	JHU_ID_15969.5p	JHU_ID_15969.3p	ucccggucgccgcgguucgccgcc	uggcggcccggcguccggcc	ucccggucgccgcgguucgccgcccgcccccgguggcggcccggcguccggcc	chr21:8257472-8257525	Colon adenocarcinoma	SRR1917336	1612	1559	18	35		Ago_20233
JHU_ID_15970	JHU_ID_15970.5p	JHU_ID_15970.3p	ccucggacccguccccccgacc	cgcgggggagacgggucggggcg	ccucggacccguccccccgaccuccgcgggggagacgggucggggcg	chr21:8257854-8257901	H9 ESC	SRR1988290	4116	4084	3	29		Ago_20235
JHU_ID_15972	JHU_ID_15972.5p	JHU_ID_15972.3p	gcggcggcggcggggguguguggg	cgccccccccccacgccucc	gcggcggcggcgggggugugugggguccucccccgccccccccccacgccucc	chr21:8260267-8260320	Adult skin fibroblast	SRR2960040	401	387	0	14		Ago_20237
JHU_ID_15995	JHU_ID_15995.5p	JHU_ID_15995.3p	gcggcggcggcggggguguguggg	cgccccccccccacgccucc	gcggcggcggcgggggugugugggguccucccccgccccccccccacgccucc	chr21:8399072-8399125	Adult skin fibroblast	SRR2960040	431	417	0	14		Ago_20262
JHU_ID_16051	JHU_ID_16051.5p	JHU_ID_16051.3p	gccugucugagcgucgcuugc	cagcuguucuguggcag	gccugucugagcgucgcuugccgaucaaaauuccccaggguugccucugggcuccuuggggugcccagcuguucuguggcag	chr22:11249742-11249824	Hypopharnyx squamous carcinoma	SRR1732015	1446	1445	0	1		Ago_20600
JHU_ID_16061	JHU_ID_16061.5p	JHU_ID_16061.3p	ugccuucugacaguaggaguugga	caacugcuauugggaaagcuug	ugccuucugacaguaggaguuggaguuugccaccaacugcuauugggaaagcuug	chr22:15817622-15817677	Lung non-small cell cancer	SRR1013971	633	632	0	1		Ago_20615
JHU_ID_16082	JHU_ID_16082.5p	JHU_ID_16082.3p	uaguuuuauauuuuugagcccu	aggccucagaaauauaaaac	aggccucagaaauauaaaacuagcugguugaucccggcuaguuuuauauuuuugagcccu	chr22:17707398-17707458	Retina	ERR973603	949	889	0	60	TJU_CMC_MD2.ID02168.5p-miR	Ago_20626		BCL2L13
JHU_ID_16106	JHU_ID_16106.5p	JHU_ID_16106.3p	ucuccugccaggcccaccuca	agugugucagagcaggagagg	agugugucagagcaggagagggagcagcccuggcuuccccagccucuccugccaggcccaccuca	chr22:18927666-18927731	BrainFrontal	SRR448330	424	395	2	27		Ago_20643		PRODH
JHU_ID_16135	JHU_ID_16135.5p	JHU_ID_16135.3p	ugugcaggugcugugugggcac	gcccucacacgugcaucugcaugug	gcccucacacgugcaucugcauguggcgugcauguggcaagcaugugcaggugcugugugggcac	chr22:19957646-19957711	T cell leukemia	SRR1292458	1223	1219	0	4	TJU_CMC_MD2.ID02173.3p-miR	Ago_20664		COMT
JHU_ID_16169	JHU_ID_16169.5p	JHU_ID_16169.3p	uguccucccucugcucgcagc	gggcugggggaggggcauc	gggcugggggaggggcaucgggcuuagauguccucccucugcucgcagc	chr22:20431987-20432036	Fibroblast strain	SRR020286	101	101	0	0	TJU_CMC_MD2.ID02179.3p-miR	Ago_20688		XXbac-B562F10.12
JHU_ID_16350	JHU_ID_16350.5p	JHU_ID_16350.3p	uuugccucuggcucacccucu	cuuggggagcucagacagggcaaau	cuuggggagcucagacagggcaaauaggugggucuuugauaaggaauaccuuugccucuggcucacccucu	chr22:30341887-30341958	BrainPrefrontalCortex	ERR409883	308	297	0	11	TJU_CMC_MD2.ID02195.3p-miR	Ago_20829		SF3A1
JHU_ID_16359	JHU_ID_16359.5p	JHU_ID_16359.3p	aagcucugucugugucucuagg	uuagggaggcgagauugagccuuu	uuagggaggcgagauugagccuuuugugagguuacaaauuaaagcucugucugugucucuagg	chr22:30888161-30888224	Retina	ERR973603	1233	1040	0	193	TJU_CMC_MD2.ID02198.3p-miR	Ago_20839
JHU_ID_16372	JHU_ID_16372.5p	JHU_ID_16372.3p	uagcagggugggggggcaggaacu	auccgggccccccagccugcgaagc	uagcagggugggggggcaggaacugaggggugcggauccgggccccccagccugcgaagc	chr22:31346829-31346889	Colon adenocarcinoma	SRR1917337	77	66	0	11	TJU_CMC_MD2.ID02202.5p-miR	Ago_20846		LINC01521
JHU_ID_16448	JHU_ID_16448.5p	JHU_ID_16448.3p	auggacauuuuccugaaggcc	ccuucagggaaauguccauuu	auggacauuuuccugaaggccaaaaucaacagguacaggccuucagggaaauguccauuu	chr22:37589232-37589292	Islet Beta Cell	SRR873410	1537	1536	0	1		Ago_20922
JHU_ID_16540	JHU_ID_16540.3p	JHU_ID_16540.5p	uuggcgccggcaauggcaggagc	ccuggccaggccucuuggugcccacu	ccuggccaggccucuuggugcccacugugcuccugauuaguuggcgccggcaauggcaggagc	chr22:39628672-39628735	BrainPrefrontalCortex	ERR409883	68	66	0	2		Ago_20977		CACNA1I
JHU_ID_16548	JHU_ID_16548.5p	JHU_ID_16548.3p	aggcgggaauuccaucucauu	auugcagaugcuuuucccuccaau	aggcgggaauuccaucucauugcguuggaauuuaaagcaauugcagaugcuuuucccuccaau	chr22:40310259-40310322	Colon adenocarcinoma	SRR1917336	228	181	0	47	TJU_CMC_MD2.ID02224.5p-miR	Ago_20980		TNRC6B
JHU_ID_16554	JHU_ID_16554.5p	JHU_ID_16554.3p	agaacucugaggccagagccug	agcccuggccuugugguuuuaa	agaacucugaggccagagccugcuagacucuagggccagcccuggccuugugguuuuaa	chr22:40435348-40435407	Bladder	DRR013040	203	190	2	11		Ago_20984
JHU_ID_16564	JHU_ID_16564.5p	JHU_ID_16564.3p	gggacacagacccccugacggu	aagucagggacucugggugcagc	aagucagggacucugggugcagccagugaugagaggcugggacacagacccccugacggu	chr22:41225152-41225212	BladderEpithelium	DRR013036	174	157	0	17	TJU_CMC_MD2.ID02230.3p-miR	Ago_21001
JHU_ID_16588	JHU_ID_16588.5p	JHU_ID_16588.3p	cuguucucugcucuccccgca	ucuggguaagggagcagggccag	ucuggguaagggagcagggccagcauucuaucucacugcuguucucugcucuccccgca	chr22:41939197-41939256	Cervical cancer	SRR1304304	70	60	0	10		Ago_21020		CENPM
JHU_ID_16598	JHU_ID_16598.5p	JHU_ID_16598.3p	aaggagagagaacaggcugagg	acuggccugaccaucuccccugu	acuggccugaccaucuccccugugggcugcaugacaaggagagagaacaggcugagg	chr22:42135646-42135703	Cervical cancer	SRR1304304	774	606	0	168		Ago_21025
JHU_ID_16616	JHU_ID_16616.5p	JHU_ID_16616.3p	ccugggaguugcgaucugcccgacc	gcggguaaaggucgcccucaaggug	gcggguaaaggucgcccucaaggugacccgccuacuuugcgggaugccugggaguugcgaucugcccgacc	chr22:42615326-42615397	SkinDermis	SRR1259222	182	178	0	4	TJU_CMC_MD2.ID02236.5p-miR	Ago_21043		RNU12
JHU_ID_16740	JHU_ID_16740.3p	JHU_ID_16740.5p	ugaagcugacccgccucugccc	cuggaggagggcagcggccuc	cuggaggagggcagcggccucuugugcaauaugcaggugaagcugacccgccucugccc	chr22:46377743-46377802	Neuron Dopaminergic	SRR5127234	962	953	0	9		Ago_21110		CELSR1
JHU_ID_16841	JHU_ID_16841.3p	JHU_ID_16841.5p	ugccugugggaugccugcugagc	ucagcagcagcccuggccgc	ucagcagcagcccuggccgcgggggaugggacaggggccugccugccugugggaugccugcugagc	chr22:50218635-50218701	Cervical cancer	SRR1304304	126	125	0	1		Ago_21180		TUBGCP6
JHU_ID_16858	JHU_ID_16858.5p	JHU_ID_16858.3p	cucaccccuguggcacucuggg	cugggugccuccacggagugggca	cugggugccuccacggagugggcauggggcuggugcugcucaccccuguggcacucuggg	chr22:50318689-50318749	Platelet	SRR1592244	289	274	0	15	TJU_CMC_MD2.ID02264.5p-miR	Ago_21196
JHU_ID_16859	JHU_ID_16859.5p	JHU_ID_16859.3p	cagguggaggugugagguccugg	aggaccuuggacauccacuuucu	cagguggaggugugagguccuggggcaucauggcaggaccuuggacauccacuuucu	chr22:50407456-50407513	Astrocytes	SRR5127214	196	190	0	6	TJU_CMC_MD2.ID02265.5p-miR	Ago_21200
JHU_ID_16861	JHU_ID_16861.5p	JHU_ID_16861.3p	uccguccgcguguggaaggucc	uccguccgcguguggaaggucc	uccguccgcguguggaagguccguccgcguguggaagguccgucaguguguggaagguccguccgcguguggaaggucc	chr22:50424358-50424437	Adrenal	SRR944034	1938	1932	6	0		Ago_21202
JHU_ID_16938	JHU_ID_16938.5p	JHU_ID_16938.3p	aucagggaugcuacuuaacuuc	gaaguuaaguaggaucccugauu	aucagggaugcuacuuaacuucucuauauuuguuccugugagaaguuaaguaggaucccugauu	chr3:108462414-108462478	Neuron Cortical	SRR5127209	151	103	0	48	TJU_CMC_MD2.ID02365.5p-miR	Ago_4393		MYH15
JHU_ID_16955	JHU_ID_16955.3p	JHU_ID_16955.5p	acagguccuaagagacugcauc	auguggccucuaagaacccgcu	auguggccucuaagaacccgcucuuacuucuaaaaggacagguccuaagagacugcauc	chr3:112737103-112737162	Lung cancer	SRR1013984	103	92	0	11		Ago_4406		RP11-572C15.5
JHU_ID_16974	JHU_ID_16974.5p	JHU_ID_16974.3p	uccagaggaggcugagguggc	cgccucagccucucuccugugcu	cgccucagccucucuccugugcuugucagugcccuaaguccagaggaggcugagguggc	chr3:116392473-116392532	Astrocytes	SRR5127214	165	160	0	5		Ago_4434
JHU_ID_17035	JHU_ID_17035.5p	JHU_ID_17035.3p	ucccucucccuccuugcuccuacc	caggggcaggcgguggagguugu	caggggcaggcgguggagguugugacucugcuugcuuucucccucucccuccuugcuccuacc	chr3:124093100-124093163	Neuron iPSC	SRR1777169	1114	1073	0	41	TJU_CMC_MD2.ID02379.3p-miR	Ago_4483
JHU_ID_17109	JHU_ID_17109.5p	JHU_ID_17109.3p	agaaggagcugggcugaucuga	ugcaucaggccacuccuuccuc	agaaggagcugggcugaucugagcagguaggagcucugcaucaggccacuccuuccuc	chr3:127759702-127759760	B Cell Centrocyte	SRR060982	86	83	0	3	TJU_CMC_MD2.ID02390.3p-miR	Ago_4519		MGLL
JHU_ID_17255	JHU_ID_17255.3p	JHU_ID_17255.5p	ucuaccguugccagcccggcugc	aguugggcuggcagggugugggg	aguugggcuggcaggguguggggagaggccucacugccgauuccucuaccguugccagcccggcugc	chr3:138835034-138835101	Colon adenocarcinoma	SRR1917329	512	509	1	2	TJU_CMC_MD2.ID02404.3p-miR	Ago_4592
JHU_ID_17286	JHU_ID_17286.5p	JHU_ID_17286.3p	uguuuagcauccuguagccugc	uagguuguaggaugcuaaacaga	uguuuagcauccuguagccugcauccuacucuguagguuguaggaugcuaaacaga	chr3:143783124-143783180	B cell lymphoblastoid	SRR1304313	484	399	0	85	TJU_CMC_MD2.ID02411.3p-miR	Ago_4624
JHU_ID_17345	JHU_ID_17345.5p	JHU_ID_17345.3p	acugacugucucugaagaaauc	uuucuucagagacagucaguca	acugacugucucugaagaaaucacagaugaucagaucuucugugauuucuucagagacagucaguca	chr3:156727739-156727806	Hepatocellular carcinoma	SRR2085171	111	108	0	3		Ago_4684
JHU_ID_17362	JHU_ID_17362.5p	JHU_ID_17362.3p	auugaauuuuuguuugugaccu	gucacaaacaaaaauucacaac	auugaauuuuuguuugugaccuguaccauuccacaggucacaaacaaaaauucacaac	chr3:160401190-160401248	RPE/Choroid	ERR973610	58	52	0	6		Ago_4708		SMC4
JHU_ID_17477	JHU_ID_17477.3p	JHU_ID_17477.5p	ugauaucuguguuucucc	agguaacccuagauaucagc	agguaacccuagauaucagcuguguaggagguugcugauaucuguguuucucc	chr3:186096472-186096525	Colon adenocarcinoma	SRR1917336	447	442	0	5		Ago_4830
JHU_ID_17506	JHU_ID_17506.5p	JHU_ID_17506.3p	gaauuauaacucggugcucugu	aaagagcacugaguuauaaugcc	aaagagcacugaguuauaaugccaaagugaccagcaucgugacuuuggaauuauaacucggugcucugu	chr3:190182732-190182801	Cervical cancer	SRR1532965	7073	6882	1	190	TJU_CMC_MD2.ID02441.5p-miR	Ago_4858
JHU_ID_17643	JHU_ID_17643.5p	JHU_ID_17643.3p	uccuuuaacaaauuacuguagc	uacaguaauuuguuaaaggaua	uacaguaauuuguuaaaggauagagaguuaccuucccauccuuuaacaaauuacuguagc	chr3:37183235-37183295	Immort. Mammary Epi	SRR433866	310	306	0	4		Ago_3999
JHU_ID_17655	JHU_ID_17655.5p	JHU_ID_17655.3p	cugcaucucaggucugcaccucu	acagggcaacucugggaucacau	cugcaucucaggucugcaccucuggucuugcucagcaccacagggcaacucugggaucacau	chr3:38325645-38325707	BrainPrefrontalCortex	ERR409900	426	283	0	143	TJU_CMC_MD2.ID02303.5p-miR	Ago_4011
JHU_ID_17675	JHU_ID_17675.5p	JHU_ID_17675.3p	cacacuggccuuacuuccugacc	ccggagaguaaggcacuggguu	ccggagaguaaggcacuggguuugaaggacaaaaucaaccacacuggccuuacuuccugacc	chr3:39961564-39961626	Colon adenocarcinoma	SRR1917329	1105	1037	1	67	TJU_CMC_MD2.ID02305.3p-miR	Ago_4022		MYRIP
JHU_ID_17725	JHU_ID_17725.5p	JHU_ID_17725.3p	ugaggacagcagcuccgagucu	accggugcuccugucuaacgga	ugaggacagcagcuccgagucuguguguguuuguggaccggugcuccugucuaacgga	chr3:44625339-44625397	Cervical cancer	SRR1304304	214	212	0	2	TJU_CMC_MD2.ID02313.3p-miR	Ago_4055		ZNF197
JHU_ID_17796	JHU_ID_17796.5p	JHU_ID_17796.3p	ugccuugcccucucccucuagg	uggagauggugagggcagggagugu	uggagauggugagggcagggagugugcugagucaugccuugcccucucccucuagg	chr3:48680228-48680284	Platelet	SRR1592246	1131	978	0	153	TJU_CMC_MD2.ID02324.3p-miR	Ago_4115		NCKIPSD
JHU_ID_17823	JHU_ID_17823.5p	JHU_ID_17823.3p	uggcuguguggcugcucuggacc	ugucagggcuggacacagcugc	uggcuguguggcugcucuggaccuggaguggaugguguggugucagggcuggacacagcugc	chr3:49715299-49715361	Cervical cancer	SRR1304304	355	294	0	61		Ago_4144		RNF123
JHU_ID_17930	JHU_ID_17930.5p	JHU_ID_17930.3p	caacaggccuugcucugcucaca	ugugggcagagcagagccugc	ugugggcagagcagagccugcauuggccaucuccaucuggcccaggccaacaggccuugcucugcucaca	chr3:52523356-52523426	Macrophage	SRR1532975	1317	1243	0	74	TJU_CMC_MD2.ID02341.3p-miR	Ago_4208		STAB1
JHU_ID_17944	JHU_ID_17944.5p	JHU_ID_17944.3p	uugacucggggcccucacucuggg	cagcaugcaaguuccagagccagcc	uugacucggggcccucacucuggggcuggggcccagacuacuccagcaugcaaguuccagagccagcc	chr3:53074930-53074998	Colon adenocarcinoma	SRR1917329	193	189	0	4		Ago_4215		RP11-894J14.5
JHU_ID_17958	JHU_ID_17958.5p	JHU_ID_17958.3p	cacaggcaggagaccccac	ggaguuacugaugugca	ggaguuacugaugugcacccucguccccgcaaugguucugugagggcacaggcaggagaccccac	chr3:53763000-53763065	Bladder	DRR013043	625	576	0	49	TJU_CMC_MD2.ID02347.5p-miR	Ago_4226
JHU_ID_18170	JHU_ID_18170.3p	JHU_ID_18170.5p	uugaguagacuucagggaagc	uucccugaagucuacucaagu	uucccugaagucuacucaagugaugcauacuucacuugaguagacuucagggaagc	chr4:113184043-113184099	BrainFrontalcortex	SRR553572	194	184	0	10		Ago_5497			MIR8082
JHU_ID_18227	JHU_ID_18227.5p	JHU_ID_18227.3p	aaacuucuggucacguaggauu	uccuauggggccagaaguuuca	aaacuucuggucacguaggauuugaaagcccauuuacauccuauggggccagaaguuuca	chr4:128550151-128550211	Adrenal	SRR944034	116	109	0	7	TJU_CMC_MD2.ID02563.3p-miR	Ago_5534
JHU_ID_18256	JHU_ID_18256.5p	JHU_ID_18256.3p	ugugcccugagacugcuaagu	cuagcagucucaggacacaca	ugugcccugagacugcuaaguauuuguauucccaaugccuagcagucucaggacacaca	chr4:138307173-138307232	Astrocytes	SRR5127214	156	142	0	14	TJU_CMC_MD2.ID02565.3p-miR	Ago_5553		LINC00498
JHU_ID_18270	JHU_ID_18270.5p	JHU_ID_18270.3p	uuccccgcuuccccccuaggg	caaagggggugagcuggggagagg	caaagggggugagcuggggagaggaggcgagaggcucuccuuccccgcuuccccccuaggg	chr4:140152287-140152348	Adrenal	SRR944034	416	327	0	89	TJU_CMC_MD2.ID02569.3p-miR	Ago_5571
JHU_ID_18279	JHU_ID_18279.5p	JHU_ID_18279.3p	aggacuggaugucgggcugcaugu	agcaaugccaagcaucccugu	agcaaugccaagcaucccuguggcagucuguuggagaggcagagcugcugcaggacuggaugucgggcugcaugu	chr4:141707941-141708016	B cell lymphoblastoid	SRR1304313	616	536	0	80		Ago_5584		IL15
JHU_ID_18305	JHU_ID_18305.5p	JHU_ID_18305.3p	cuggggcuuccggcugcacua	ggacagccaagggggccccgagc	ggacagccaagggggccccgagccagccggagugcugggcuggggcuuccggcugcacua	chr4:151015825-151015885	Neuron iPSC	SRR1777161	154	149	2	3		Ago_5614
JHU_ID_18319	JHU_ID_18319.5p	JHU_ID_18319.3p	ggauucuaagucaauggcacug	uugccuauggguuuuauuucucc	uugccuauggguuuuauuucuccuucuccuuacacuucuggggauucuaagucaauggcacug	chr4:153174149-153174212	Islet Beta Cell	SRR1028925	142	135	0	7	TJU_CMC_MD2.ID02576.5p-miR	Ago_5626		TRIM2
JHU_ID_18356	JHU_ID_18356.5p	JHU_ID_18356.3p	ugaggagccucugugaccugagc	ugggucugagggcugcucucc	ugaggagccucugugaccugagcugcccuuguggccugagcugggucugagggcugcucucc	chr4:1611384-1611446	Prostate adenocarcinoma	SRR1810079	163	162	0	1	TJU_CMC_MD2.ID02462.5p-miR	Ago_4955
JHU_ID_18359	JHU_ID_18359.5p	JHU_ID_18359.3p	aaaggggacagcucacaggauu	auccugugaccauccuccauga	aaaggggacagcucacaggauuacauuuuucuaagccaauccugugaccauccuccauga	chr4:16227871-16227931	T cell leukemia	SRR1292458	442	432	0	10	TJU_CMC_MD2.ID02495.3p-miR	Ago_5111		TAPT1-AS1
JHU_ID_18390	JHU_ID_18390.5p	JHU_ID_18390.3p	gcccaggaugaaacucugaca	ucuaagugguguccuguggcag	ucuaagugguguccuguggcagggcucuagggcucucuaccuggugccuagcccaggaugaaacucugaca	chr4:1735491-1735562	Cervical cancer	SRR1304304	25213	25212	0	1	TJU_CMC_MD2.ID02465.3p-miR	Ago_4960		TACC3
JHU_ID_18458	JHU_ID_18458.3p	JHU_ID_18458.5p	cccggacccaaagagccccagu	cugccggcucugggaccgcgggcu	cugccggcucugggaccgcgggcucggccacgcagucccgcccggacccaaagagccccagu	chr4:186723948-186724010	T cell leukemia	SRR1304307	136	135	0	1		Ago_5726
JHU_ID_18533	JHU_ID_18533.5p	JHU_ID_18533.3p	cagagggacagacagugcggcg	uagcacugcuuuuccccaugug	uagcacugcuuuuccccauguggcgcgugcacacgcucacacagagggacagacagugcggcg	chr4:2943888-2943951	Cervical cancer	SRR1304304	192	186	0	6	TJU_CMC_MD2.ID02474.3p-miR	Ago_4998		NOP14
JHU_ID_18551	JHU_ID_18551.5p	JHU_ID_18551.3p	gggccacucacaggccaggc	cagaugagccucccac	cagaugagccucccacugcccaggagggcugaaggcaggggccacucacaggccaggc	chr4:3763639-3763697	Lung cancer	SRR1013983	3735	3312	9	414		Ago_5008
JHU_ID_18564	JHU_ID_18564.5p	JHU_ID_18564.3p	ugagcuagggauaucuccugaga	ucaggaaaaaucccuagcuuggu	ugagcuagggauaucuccugagaaugucuccucccuauucucaggaaaaaucccuagcuuggu	chr4:39238517-39238580	BrainPrefrontalCortex	ERR409883	120	105	0	15	TJU_CMC_MD2.ID02508.5p-miR	Ago_5208		WDR19
JHU_ID_18592	JHU_ID_18592.5p	JHU_ID_18592.3p	agauggggagaacucaauccu	gauugaguucuccccaucucc	agauggggagaacucaauccuaaauguauuuaggaauuuaagauugaguucuccccaucucc	chr4:48220121-48220183	Lung Adenocarcinoma	SRR1013979	401	386	0	15	TJU_CMC_MD2.ID02514.3p-miR	Ago_5237		TEC
JHU_ID_18687	JHU_ID_18687.3p	JHU_ID_18687.5p	gcuggcccucugcccucugccuuc	ugcagcggggagggccuugcuc	ugcagcggggagggccuugcucugcucgcauaucuccgagcuggcccucugcccucugccuuc	chr4:684072-684135	Macrophage	SRR1532975	202	199	0	3		Ago_4926		MFSD7
JHU_ID_18735	JHU_ID_18735.5p	JHU_ID_18735.3p	ugugcaggcaugcaguuuauguu	cauaaacugcaugccugcacacca	cauaaacugcaugccugcacaccaggcaugcagugaugugcaggcaugcaguuuauguu	chr4:75973881-75973940	Embryonic kidney	SRR1240816	956	813	1	142	TJU_CMC_MD2.ID02535.3p-miR	Ago_5332
JHU_ID_18785	JHU_ID_18785.3p	JHU_ID_18785.5p	auugaauacuuaaaugaggaua	auccagugauuaaaccuuuucacu	auccagugauuaaaccuuuucacugcuguucacauaaugaaccguugugauuauugaauacuuaaaugaggaua	chr4:82898145-82898219	Immort. Mammary Epi	SRR433866	9292	9238	6	48		Ago_5363		THAP9-AS1
JHU_ID_18885	JHU_ID_18885.5p	JHU_ID_18885.3p	cgccgcuuucugggcucgcuc	ugcgggcccugggaguggagac	ugcgggcccugggaguggagacgcggagcugcggucgccgcuuucugggcucgcuc	chr5:108748635-108748691	Cervical cancer	SRR1304304	9171	8828	14	329	TJU_CMC_MD2.ID02670.3p-miR	Ago_6231		FER
JHU_ID_18892	JHU_ID_18892.5p	JHU_ID_18892.3p	uagcaagggcuccggaaggu	cuuccagaguccuugccagc	uagcaagggcuccggaaggucauccuugggccggaugaccuuccagaguccuugccagc	chr5:109613488-109613547	BrainCerebellum	SRR553573	56	55	0	1	TJU_CMC_MD2.ID02671.5p-miR	Ago_6234
JHU_ID_18902	JHU_ID_18902.3p	JHU_ID_18902.5p	cagcccuguucccuccauccuggc	ggggguggggacggggcugg	ggggguggggacggggcuggggagagaaucccccagcccuguucccuccauccuggc	chr5:1111188-1111245	Astrocytes	SRR5127214	102	101	0	1	TJU_CMC_MD2.ID02599.3p-miR	Ago_5778		SLC12A7	MIR4635
JHU_ID_18959	JHU_ID_18959.5p	JHU_ID_18959.3p	cggcccggccuggaugcgcug	gacguguccagguccgcggccc	gacguguccagguccgcggccccgggagcuuggcgcggcccggccuggaugcgcug	chr5:126423424-126423480	Cervical cancer	SRR1304304	754	734	0	20	TJU_CMC_MD2.ID02680.3p-miR	Ago_6293		GRAMD3
JHU_ID_18968	JHU_ID_18968.5p	JHU_ID_18968.3p	uggcuggccgcgcucuucgcacg	cgcgccguucgugcugcccgcacug	cgcgccguucgugcugcccgcacugcccgaggcccuuugcggacuggcuggccgcgcucuucgcacg	chr5:128083495-128083562	Neuron iPSC	SRR1777169	1784	1692	0	92	TJU_CMC_MD2.ID02683.5p-miR	Ago_6301
JHU_ID_19043	JHU_ID_19043.5p	JHU_ID_19043.3p	cgcggcggccgcggcgggugcugg	cgccugccucgccgccgcccuc	cgcggcggccgcggcgggugcugggagccagcgccugccucgccgccgcccuc	chr5:134846021-134846074	Macrophage	SRR1532975	113	81	0	32	TJU_CMC_MD2.ID02692.5p-miR	Ago_6357		C5orf24
JHU_ID_19059	JHU_ID_19059.3p	JHU_ID_19059.5p	caaaggcaaaacucuguuuccc	caagcagagugcaagugucuu	caagcagagugcaagugucuuagaggucucuucuuugcucaaaggcaaaacucuguuuccc	chr5:136075532-136075593	Myofibroblast	SRR5127220	93	90	0	3		Ago_6373
JHU_ID_19077	JHU_ID_19077.5p	JHU_ID_19077.3p	cccucuccacucccagccccgga	cccgggcugggcgcgaagagagg	cccgggcugggcgcgaagagaggaccggcuuggcggcucggugcugcccccuggagguucccucuccacucccagccccgga	chr5:138464243-138464325	Platelet	SRR1592246	517	414	0	103	TJU_CMC_MD2.ID02697.3p-miR	Ago_6397
JHU_ID_19126	JHU_ID_19126.5p	JHU_ID_19126.3p	gacccgcgggcgcucuccaguccu	gguucgagacccgcggga	gacccgcgggcgcucuccaguccuuuuaccucucugggcgguucgagacccgcggga	chr5:140711347-140711404	T cell leukemia	SRR1304307	42512	42025	22	465	TJU_CMC_MD2.ID02704.5p-miR	Ago_6432		VTRNA1-1
JHU_ID_19127	JHU_ID_19127.3p	JHU_ID_19127.5p	cgcgggugcuuuccagcucuuu	ugggcuggcuuuagcucagcggu	ugggcuggcuuuagcucagcgguuacuucgaguacauuguaaccaccucucugggugguucgagacccgcgggugcuuuccagcucuuu	chr5:140718924-140719013	Colon adenocarcinoma	SRR1917329	216275	211162	941	4172		Ago_6433
JHU_ID_19219	JHU_ID_19219.3p	JHU_ID_19219.5p	uggccucucugccccuuccagu	uggccuggggcaggcuggg	uggccuggggcaggcugggcaaaccuggccucucugccccuuccagu	chr5:150250809-150250856	BrainPrefrontalCortex	ERR409883	91	88	0	3		Ago_6505		CAMK2A
JHU_ID_19295	JHU_ID_19295.5p	JHU_ID_19295.3p	caaaagggcucagagcacagcc	gggugcucugagcccuuuugua	gggugcucugagcccuuuuguauccgcccucugcugccagcuucaaaagggcucagagcacagcc	chr5:157309986-157310051	Cervical cancer	SRR1304304	166	157	0	9	TJU_CMC_MD2.ID02725.3p-miR	Ago_6558		CYFIP2
JHU_ID_19303	JHU_ID_19303.5p	JHU_ID_19303.3p	ggccggaggaccuggagcugucu	ccagcacuuuccccugccuc	ggccggaggaccuggagcugucugcgaggagcccacgcuuugccagcacuuuccccugccuc	chr5:159099100-159099162	Neuron Dopaminergic	SRR5127234	60	59	0	1	TJU_CMC_MD2.ID02728.5p-miR	Ago_6572
JHU_ID_19334	JHU_ID_19334.5p	JHU_ID_19334.3p	uugcuuaugucaggugagagggg	ucucaccuggcauaagcaauuc	uugcuuaugucaggugagagggguagacaccaauucucucucaccuggcauaagcaauuc	chr5:168165859-168165919	Islet Alpha Cell	SRR1028924	367	315	0	52	TJU_CMC_MD2.ID02734.3p-miR	Ago_6597
JHU_ID_19362	JHU_ID_19362.5p	JHU_ID_19362.3p	ucugaauaggucaauuccccu	agaagaauuggccuacucaggu	agaagaauuggccuacucaggugucagcaaagccuuccucucugaauaggucaauuccccu	chr5:17155931-17155992	Cervical cancer	SRR1575597	192	155	0	37		Ago_5863		AC091878.1
JHU_ID_19436	JHU_ID_19436.3p	JHU_ID_19436.5p	ugacggccccccuccccuccaca	cagggggggcaggaggugucgg	cagggggggcaggaggugucggcuggggccaggccaggcugcugacggccccccuccccuccaca	chr5:176879655-176879720	BrainFrontalcortex	SRR553572	169	166	0	3	TJU_CMC_MD2.ID02748.3p-miR	Ago_6672		UNC5A
JHU_ID_19445	JHU_ID_19445.5p	JHU_ID_19445.3p	gcuggggaggugaacugguga	accagcucucauccccagcgc	accagcucucauccccagcgcugguaccacacuuaggcugggcuggggaggugaacugguga	chr5:177339349-177339411	B Cell_Pre-germinal center	SRR060983	440	351	2	87	TJU_CMC_MD2.ID02753.3p-miR	Ago_6684		LMAN2
JHU_ID_19450	JHU_ID_19450.5p	JHU_ID_19450.3p	aagaggucggggaacggcugc	agccuccucccugucucuccc	aagaggucggggaacggcugcgaggccgcagccuccucccugucucuccc	chr5:177426062-177426112	T cell leukemia	SRR1292461	122	118	0	4	TJU_CMC_MD2.ID02754.5p-miR	Ago_6686
JHU_ID_19452	JHU_ID_19452.5p	JHU_ID_19452.3p	uccaccuguuucuccacccaca	ggggugagaugcagaggcc	ggggugagaugcagaggccuggccuguuaacggguccaccuguuucuccacccaca	chr5:177434971-177435027	Red Blood Cell	SRR1664897	229	228	0	1	TJU_CMC_MD2.ID02755.3p-miR	Ago_6687		GRK6
JHU_ID_19506	JHU_ID_19506.5p	JHU_ID_19506.3p	uggggugggcucaggguggcagg	ugccgcucugcuaauuccucccccagg	uggggugggcucaggguggcaggaaccuugacccgcucacugccugccgcucugcuaauuccucccccagg	chr5:179824112-179824183	Astrocytes	SRR5127214	71	66	1	4	TJU_CMC_MD2.ID02767.3p-miR	Ago_6728		SQSTM1
JHU_ID_19541	JHU_ID_19541.5p	JHU_ID_19541.3p	gcuuguugugauuccuccauuuu	aggaggaagucgccuugggccc	gcuuguugugauuccuccauuuuugucccuucauggguuacaaaaggaggaagucgccuugggccc	chr5:181101922-181101988	Lung squamous carcinoma	SRR1013975	21914	21912	0	2		Ago_6749			MIR8089
JHU_ID_19569	JHU_ID_19569.5p	JHU_ID_19569.3p	ugccauauuuuuaagucuugac	caagacuuaaaaauauggcacu	caagacuuaaaaauauggcacugauugcucaauucccaccuaucagugccauauuuuuaagucuugac	chr5:24954176-24954244	Lung squamous carcinoma	SRR1013976	126	92	0	34		Ago_5889
JHU_ID_19571	JHU_ID_19571.5p	JHU_ID_19571.3p	agaaaugguagaaugacaggcc	ggucuucauucuaccagacu	ggucuucauucuaccagacuuugcugucggaagagagaaaugguagaaugacaggcc	chr5:25190334-25190391	BrainPrefrontalCortex	SRR1759219	121	120	0	1		Ago_5891		RP11-549K20.1
JHU_ID_19609	JHU_ID_19609.5p	JHU_ID_19609.3p	agggaccccugacugacaacgc	uugccagccaggggucccug	uugccagccaggggucccugcaaugucacuuugcaagccagggaccccugacugacaacgc	chr5:34537906-34537967	Lung non-small cell cancer	SRR1013972	81	70	0	11	TJU_CMC_MD2.ID02620.5p-miR	Ago_5931
JHU_ID_19619	JHU_ID_19619.3p	JHU_ID_19619.5p	uuuauuauuccauauguagacug	uucuacauaugcacuaauaaacc	uucuacauaugcacuaauaaaccaugagacaaccaugguuuauuauuccauauguagacug	chr5:37077209-37077270	Colon adenocarcinoma	SRR1917329	240	238	0	2		Ago_5944
JHU_ID_19677	JHU_ID_19677.5p	JHU_ID_19677.3p	ccugcggcugggccuggcgccg	guuggcgggcgaagaagcggguu	ccugcggcugggccuggcgccgggggcugccaccgcggcaggaggcggagggguuggcgggcgaagaagcggguu	chr5:55173409-55173484	Lung Adenocarcinoma	SRR1013980	165	163	1	1		Ago_6005			MIR449C
JHU_ID_19759	JHU_ID_19759.5p	JHU_ID_19759.3p	aucugucagucugagugacugg	ucauucagacugacagauguu	aucugucagucugagugacuggucuuauaaagugaccuuugagaccagucauucagacugacagauguu	chr5:67581438-67581507	Epithelium Prostate	SRR5127212	530	348	1	181	TJU_CMC_MD2.ID02642.5p-miR	Ago_6067
JHU_ID_19780	JHU_ID_19780.5p	JHU_ID_19780.3p	augugcuacccugcuuggcuug	aaggcagacgcgguggcucac	augugcuacccugcuuggcuuguuuuaaaaaugcauuucaaggcagacgcgguggcucac	chr5:71622785-71622845	Colon adenocarcinoma	SRR1917329	1325	1214	0	111	TJU_CMC_MD2.ID02645.5p-miR	Ago_6081
JHU_ID_19788	JHU_ID_19788.3p	JHU_ID_19788.5p	cggccgggcugccaggagcagu	ggcuccuugcgcucggcggc	ggcuccuugcgcucggcggccgcggcggcagcagcagcagacgcuggcggccgggcugccaggagcagu	chr5:72848135-72848204	Retina	ERR973613	252	175	4	73	TJU_CMC_MD2.ID02646.3p-miR	Ago_6088		TNPO1
JHU_ID_19805	JHU_ID_19805.3p	JHU_ID_19805.5p	cugcucuuacaucucaaacga	uugagaugcaagggcugcu	uugagaugcaagggcugcugcagggcuacuagagcugcucuuacaucucaaacga	chr5:76372676-76372731	Colon adenocarcinoma	SRR1917336	59	55	0	4		Ago_6114
JHU_ID_19930	JHU_ID_19930.5p	JHU_ID_19930.3p	ccggaguuggaccugggacuug	ucagucccagguccaauccuga	ucagucccagguccaauccugaguggccaaaagcaggagacccggaguuggaccugggacuug	chr6:10722842-10722905	Colon adenocarcinoma	SRR1917329	2388	2371	1	16		Ago_6844
JHU_ID_19975	JHU_ID_19975.3p	JHU_ID_19975.5p	cuucagugucgauccccgaggu	gucgggggugcggggcugugacc	gucgggggugcggggcugugaccuagaggcuucagugucgauccccgaggu	chr6:111087504-111087555	Cervical cancer	SRR1304304	60	57	0	3		Ago_7472		SLC16A10
JHU_ID_20017	JHU_ID_20017.5p	JHU_ID_20017.3p	ugagcaagugaaguauguggu	ccacauacuucacuugcucag	ugagcaagugaaguaugugguagcagugaaguaucuaccacauacuucacuugcucag	chr6:119823108-119823166	Breast adenocarcinoma	SRR873383	1646	1595	1	50	TJU_CMC_MD2.ID02876.5p-miR	Ago_7517
JHU_ID_20100	JHU_ID_20100.5p	JHU_ID_20100.3p	ugacuacuuuguuugauuuugu	aaaaucaaacacgguagucac	ugacuacuuuguuugauuuuguuuucugaagacauaaauaaaacaaaaucaaacacgguagucac	chr6:141987435-141987500	Lung Adenocarcinoma	SRR1013979	330	296	2	32	TJU_CMC_MD2.ID02893.5p-miR	Ago_7612
JHU_ID_20101	JHU_ID_20101.5p	JHU_ID_20101.3p	ugugugcuuguauauauauau	uauauauacaagcacacacaca	ugugugcuuguauauauauauauauauauauauauauacaagcacacacaca	chr6:142013663-142013715	Colon adenocarcinoma	SRR1917336	24913	23231	0	1682	TJU_CMC_MD2.ID02894.3p-miR	Ago_7613
JHU_ID_20113	JHU_ID_20113.5p	JHU_ID_20113.3p	cgcguccagcugggaggagcu	cuccuccccagcugggugcugu	cgcguccagcugggaggagcuuuacgaccaugugguaaagcuccuccccagcugggugcugu	chr6:143285331-143285393	Colon adenocarcinoma	SRR1917337	80	77	0	3	TJU_CMC_MD2.ID02896.5p-miR	Ago_7622
JHU_ID_20129	JHU_ID_20129.5p	JHU_ID_20129.3p	uccuccuagcucugucuuucc	aagggcagaagccaggaggaa	uccuccuagcucugucuuuccaguagugugucaguuuauaaaucaauuggaagggcagaagccaggaggaa	chr6:146042222-146042293	Retina	ERR973613	180	172	0	8	TJU_CMC_MD2.ID02900.5p-miR	Ago_7640		GRM1
JHU_ID_20215	JHU_ID_20215.5p	JHU_ID_20215.3p	ccagccccaaccuaagcaugugac	agaugcuguuggaaccuggcugaca	ccagccccaaccuaagcaugugacuguacucaccuugucagaugcuguuggaaccuggcugaca	chr6:158323065-158323129	Lung cancer	SRR1013984	265	196	0	69	TJU_CMC_MD2.ID02920.3p-miR	Ago_7704		TULP4
JHU_ID_20568	JHU_ID_20568.5p	JHU_ID_20568.3p	uacuugaccuugacucucccuca	augggagagagaagggcugguuc	augggagagagaagggcugguucuggauuguugggaaacuccacaguacuugaccuugacucucccuca	chr6:33201672-33201741	Lung Adenocarcinoma	SRR1013967	2445	2334	3	108	TJU_CMC_MD2.ID02816.3p-miR	Ago_7068		SLC39A7
JHU_ID_20586	JHU_ID_20586.5p	JHU_ID_20586.3p	ccauguccugucuccuuuugga	caagagaggaccaggaugg	ccauguccugucuccuuuuggaauguagagcuagugcccaagagaggaccaggaugg	chr6:3363825-3363882	Colon adenocarcinoma	SRR1917329	67	59	0	8		Ago_6796
JHU_ID_20597	JHU_ID_20597.5p	JHU_ID_20597.3p	cuucgcaugguauucugugacu	ccacagaaugccaugugaaggau	cuucgcaugguauucugugacuggcaccuucugggacacaccacagaaugccaugugaaggau	chr6:33932242-33932305	Lung Adenocarcinoma	SRR1013968	77	55	0	22	TJU_CMC_MD2.ID02821.3p-miR	Ago_7092
JHU_ID_20645	JHU_ID_20645.5p	JHU_ID_20645.3p	agaauaugggagucuguggcuau	gccacagacucccauauucuc	agaauaugggagucuguggcuauuuugucuuuuaauagccacagacucccauauucuc	chr6:36053182-36053240	T cell leukemia	SRR1292461	142	135	0	7		Ago_7130		MAPK14
JHU_ID_20711	JHU_ID_20711.5p	JHU_ID_20711.3p	aauuucugcuuuguuggucagg	ugaccuacaagucggaacguga	aauuucugcuuuguuggucaggguuuacagcauuaauggacagguucacccugaccuacaagucggaacguga	chr6:41101989-41102062	Lung Adenocarcinoma	SRR1013967	69	61	1	7		Ago_7171
JHU_ID_20731	JHU_ID_20731.5p	JHU_ID_20731.3p	gcccggagagcugggagccagagg	ccuggcucccuucucuccgucugc	ccuggcucccuucucuccgucugccuccuggccgcggggcccggagagcugggagccagagg	chr6:41733550-41733612	Macrophage	SRR1532975	192	148	0	44	TJU_CMC_MD2.ID02835.3p-miR	Ago_7183		RP11-298J23.5
JHU_ID_20872	JHU_ID_20872.5p	JHU_ID_20872.3p	augacuucuucaggccucuguu	aggacugaagaagucacaggagu	aggacugaagaagucacaggaguuggccaugacuuaagcuaugacuucuucaggccucuguu	chr6:5773635-5773697	Cervical cancer	SRR1304304	177	103	0	74	TJU_CMC_MD2.ID02782.5p-miR	Ago_6818
JHU_ID_20933	JHU_ID_20933.5p	JHU_ID_20933.3p	cggggggcugccggggccgcuggca	ccgcggucccccgccccccgcc	cggggggcugccggggccgcuggcaccgggcgauuccgcccgcggucccccgccccccgcc	chr6:79077961-79078022	Red Blood Cell	SRR1664895	78	63	0	15		Ago_7343		PHIP
JHU_ID_20969	JHU_ID_20969.5p	JHU_ID_20969.3p	ugcgcuggcgcuucugauuggc	caaugagaagcgccgcugc	ugcgcuggcgcuucugauuggcucccaggagucggccaaugagaagcgccgcugc	chr6:89081629-89081684	CD3+ T Cell Splenic	SRR5127200	71	66	0	5		Ago_7394		PNRC1
JHU_ID_21004	JHU_ID_21004.5p	JHU_ID_21004.3p	uggucucccucacaggacagcu	ucugucaugcuggggagcccagu	ucugucaugcuggggagcccaguggcguucaaaagggucuggucucccucacaggacagcu	chr7:100093656-100093717	Plasma	SRR822437	129	78	0	51	TJU_CMC_MD2.ID03026.5p-miR	Ago_8545		MCM7	MIR25
JHU_ID_21079	JHU_ID_21079.5p	JHU_ID_21079.3p	uucagcucugcgguaacccugac	caggcugcaggcugaacg	caggcugcaggcugaacgcuacagaggccguucagcucugcgguaacccugac	chr7:102125207-102125260	Colon adenocarcinoma	SRR1917330	368	367	0	1		Ago_8590
JHU_ID_21202	JHU_ID_21202.3p	JHU_ID_21202.5p	cugugcgcaucaaggagacuugc	aagccuccucuaagcagcgcaggc	aagccuccucuaagcagcgcaggcggcagccuggaugucugugcgcaucaaggagacuugc	chr7:122305741-122305802	Neuron Dopaminergic	SRR5127234	165	163	0	2		Ago_8729		FEZF1-AS1
JHU_ID_21233	JHU_ID_21233.5p	JHU_ID_21233.3p	cccaggucgcaggcuccucagg	gcccaggagcugcgguccgga	gcccaggagcugcgguccggagccgacaccgagcugggcccaggucgcaggcuccucagg	chr7:128531871-128531931	T cell leukemia	SRR1304307	94	92	0	2		Ago_8768
JHU_ID_21267	JHU_ID_21267.5p	JHU_ID_21267.3p	cucucgguucggaccugggcucg	cgcucaaggccgccccuucaugcu	cucucgguucggaccugggcucggagcggcagccuccaccacugcucguuucuuuaccgcucaaggccgccccuucaugcu	chr7:129778487-129778568	Colon adenocarcinoma	SRR1917329	411	409	0	2		Ago_8786			MIR183
JHU_ID_21268	JHU_ID_21268.5p	JHU_ID_21268.3p	gccgcgaggcggggaggggcagg	ggccccgcccgccccucgcgcagcgc	ggccccgcccgccccucgcgcagcgccauuggcucaggugccgcgaggcggggaggggcagg	chr7:129780263-129780325	Breast adenocarcinoma	SRR873382	59	55	0	4		Ago_8787			MIR183
JHU_ID_21319	JHU_ID_21319.5p	JHU_ID_21319.3p	ucuuuuccucaccucguauug	auaugagguagggagaagaug	ucuuuuccucaccucguauugccaguaacuggagcaauaugagguagggagaagaug	chr7:135996150-135996207	Lung squamous carcinoma	SRR1013975	174	167	0	7		Ago_8850
JHU_ID_21322	JHU_ID_21322.5p	JHU_ID_21322.3p	uugggggaauuggagggagguc	cucucccuucauauccccccaagcc	cucucccuucauauccccccaagccggaggcucaggggucggggcuugggggaauuggagggagguc	chr7:136869482-136869549	BladderEpithelium	DRR013036	161	131	0	30		Ago_8853		CHRM2
JHU_ID_21400	JHU_ID_21400.5p	JHU_ID_21400.3p	cccccacaaccgcgcuugacuagc	gaguguuguggguuauuguua	gaguguuguggguuauuguuaaguugauuuaacauugucuccccccacaaccgcgcuugacuagc	chr7:148941497-148941562	Neuron Cortical	SRR5127209	279198	257582	76	21540		Ago_8934
JHU_ID_21529	JHU_ID_21529.5p	JHU_ID_21529.3p	ucccucccucuuucucucugac	cagagagaaagagggagggacu	cagagagaaagagggagggacucucccugugucccucccucuuucucucugac	chr7:155787708-155787761	Macrophage	SRR1532975	160	147	0	13		Ago_9013
JHU_ID_21565	JHU_ID_21565.5p	JHU_ID_21565.3p	ucuggaccccccaguguggccc	ccucacugggucuggguuugag	ccucacugggucuggguuugagagucuuccugggccucuggaccccccaguguggccc	chr7:158558989-158559047	Islet Alpha Cell	SRR1028924	453	444	0	9	TJU_CMC_MD2.ID03090.3p-miR	Ago_9044
JHU_ID_21636	JHU_ID_21636.5p	JHU_ID_21636.3p	uggggcggacagcgcauaccugcc	uggguaugugccaacggcccucu	uggggcggacagcgcauaccugccuagccuuacaguguggguaugugccaacggcccucu	chr7:2362576-2362636	T cell leukemia	SRR1292463	227	226	0	1		Ago_7891		EIF3B
JHU_ID_21748	JHU_ID_21748.3p	JHU_ID_21748.5p	agucaccgcgucgccuccccgc	gguggaggcggcggcggcggcugc	gguggaggcggcggcggcggcugcagccgcagcuccagucaccgcgucgccuccccgc	chr7:35801832-35801890	B cell lymphoblastoid	SRR1304313	56	53	0	3	TJU_CMC_MD2.ID02968.3p-miR	Ago_8105		SEPT7
JHU_ID_21762	JHU_ID_21762.5p	JHU_ID_21762.3p	caacagaacccagagaguca	ccucucuggguucuguuucu	ccucucuggguucuguuucuucccuguaaaauacuuuagcaacagaacccagagaguca	chr7:37784900-37784959	Lung	SRR1608274	154	151	0	3	TJU_CMC_MD2.ID02969.3p-miR	Ago_8126
JHU_ID_21883	JHU_ID_21883.3p	JHU_ID_21883.5p	uuuuuccacacuggaggaga	ucuuccaauauggaaaaaaa	ucuuccaauauggaaaaaaaugugugucacgcagggauuuuuuuuccacacuggaggaga	chr7:50868101-50868161	Colon adenocarcinoma	SRR1917336	288	287	0	1		Ago_8233		RP4-724E13.2
JHU_ID_21934	JHU_ID_21934.5p	JHU_ID_21934.3p	ucggcugugggguccuguggugu	auccaggguccucacugccugucc	ucggcugugggguccugugguguguggggagcugucacauccaggguccucacugccugucc	chr7:5527905-5527967	Astrocytes	SRR5127214	407	347	0	60	TJU_CMC_MD2.ID02945.3p-miR	Ago_7940		ACTB
JHU_ID_22015	JHU_ID_22015.3p	JHU_ID_22015.5p	acauauagugaauucugggauu	ucccagaauccacuauauauag	ucccagaauccacuauauauagugaauccauauccauccuacauauagugaauucugggauu	chr7:65927352-65927414	Red Blood Cell	SRR5127232	341	335	0	6	TJU_CMC_MD2.ID02995.3p-miR	Ago_8293		VKORC1L1
JHU_ID_22103	JHU_ID_22103.5p	JHU_ID_22103.3p	ccggccacgcgccucugucuug	uaggcggugguagguggccca	ccggccacgcgccucugucuuggggauggcaucuaggcggugguagguggccca	chr7:740643-740697	Colon adenocarcinoma	SRR1917329	1978	1958	0	20	TJU_CMC_MD2.ID02934.5p-miR	Ago_7827		DNAAF5
JHU_ID_22138	JHU_ID_22138.5p	JHU_ID_22138.3p	caucugccuccucuaccccugc	ccgggguggggaagcagguucc	ccgggguggggaagcagguuccugggcucacgggcaggcaucugccuccucuaccccugc	chr7:75024570-75024630	BrainPrefrontalCortex	ERR409900	361	187	0	174		Ago_8392		GATSL2
JHU_ID_22270	JHU_ID_22270.3p	JHU_ID_22270.5p	ugacuccauuuuccauaggacu	uauggaaaauggagucaacaau	uauggaaaauggagucaacaauacugauugcaacuguaaaaauuguugacuccauuuuccauaggacu	chr7:94176812-94176880	HUVEC	SRR5127213	591	585	0	6	TJU_CMC_MD2.ID03022.3p-miR	Ago_8492
JHU_ID_22307	JHU_ID_22307.5p	JHU_ID_22307.3p	acaucagagcgcaggacugugu	acacacugcauucuagugacu	acaucagagcgcaggacugugucugcuggcuaagcuuacagacacacacugcauucuagugacu	chr7:99019712-99019776	Colon adenocarcinoma	SRR1917325	86	75	0	11		Ago_8522		AC004893.11
JHU_ID_22318	JHU_ID_22318.5p	JHU_ID_22318.3p	ccaggggaggaggugagugcag	gacucacagcucucuccccucagc	ccaggggaggaggugagugcagaggagugggacaccgugacucacagcucucuccccucagc	chr7:99391117-99391179	Platelet	SRR1592247	386	298	0	88		Ago_8527		ARPC1B
JHU_ID_22345	JHU_ID_22345.5p	JHU_ID_22345.3p	ucccccacgggccgugccgggcg	gucggcgggcgcggggggagg	gucggcgggcgcggggggaggggcgcccuucccucccuccccucccccacgggccgugccgggcg	chr8:102412091-102412156	BrainPrefrontalCortex	SRR1759212	136	127	0	9	TJU_CMC_MD2.ID03174.5p-miR	Ago_9573
JHU_ID_22403	JHU_ID_22403.5p	JHU_ID_22403.3p	uuagagcuucaaccuccaguguga	ccggggguuagagcuucaaccuc	ccggggguuagagcuucaaccuccaguaugaugguauugagguuagagcuucaaccuccaguguga	chr8:115534466-115534532	Colon adenocarcinoma	SRR1917336	894	756	0	138	TJU_CMC_MD2.ID03183.3p-miR	Ago_9617
JHU_ID_22483	JHU_ID_22483.5p	JHU_ID_22483.3p	ccagagagaggcaggggacugu	aggccccugcagcccucugacu	aggccccugcagcccucugacuguugucccugcagccagagagaggcaggggacugu	chr8:129984176-129984233	BrainPrefrontalCortex	ERR409878	199	177	0	22		Ago_9715
JHU_ID_22535	JHU_ID_22535.5p	JHU_ID_22535.3p	ccaggaccagcucugcgcccagg	ugggaagugguggcccugagg	ccaggaccagcucugcgcccaggcugggucuccccuaguggccugggaagugguggcccugagg	chr8:139738771-139738835	Colon adenocarcinoma	SRR1917336	290	289	0	1		Ago_9763		TRAPPC9
JHU_ID_22737	JHU_ID_22737.5p	JHU_ID_22737.3p	uggugaccgcuggugguggugac	caccuccugccaggugucccaca	uggugaccgcuggugguggugacagugccacugcccuggucaccuccugccaggugucccaca	chr8:144257717-144257780	Hodgkin lymphoma	SRR1535276	155	154	0	1		Ago_9896
JHU_ID_22753	JHU_ID_22753.5p	JHU_ID_22753.3p	ugcggguggaacucagggcua	gcccugacauucugcucgcuca	ugcggguggaacucagggcuaggagccagguccuggcgcagucagcccugacauucugcucgcuca	chr8:144360518-144360584	Breast adenocarcinoma	SRR873382	84	83	0	1	TJU_CMC_MD2.ID03217.5p-miR	Ago_9908		SLC52A2
JHU_ID_22782	JHU_ID_22782.5p	JHU_ID_22782.3p	ggccucaagacaaguuuccugca	caggugccuucuugggguuuc	ggccucaagacaaguuuccugcagaugucugcuugcaggugccuucuugggguuuc	chr8:144591345-144591401	Colon adenocarcinoma	SRR1917329	187	181	0	6	TJU_CMC_MD2.ID03223.5p-miR	Ago_9926
JHU_ID_22796	JHU_ID_22796.5p	JHU_ID_22796.3p	uuaugccugugacugcuguaga	uucagcguuuauuuggcauguca	uuaugccugugacugcuguagauuauuucagugaucuucagcguuuauuuggcauguca	chr8:15545840-15545899	Cervical cancer	SRR1304304	175	167	0	8		Ago_9147		TUSC3
JHU_ID_22802	JHU_ID_22802.5p	JHU_ID_22802.3p	uugcugggaaagggagaaguuc	acuucucccuuucccagaagg	acuucucccuuucccagaagggucacuucuuuuucacuugcugggaaagggagaaguuc	chr8:1755131-1755190	Platelet	ERR747965	422	398	0	24	TJU_CMC_MD2.ID03095.3p-miR	Ago_9067
JHU_ID_22820	JHU_ID_22820.5p	JHU_ID_22820.3p	uuguacuucagaaucuccaggag	ccuggagauucuaaaguauaaca	uuguacuucagaaucuccaggaguaauguaugaaguuaguccuggagauucuaaaguauaaca	chr8:19103560-19103623	Smooth muscle cell coronary	SRR5127211	184	182	0	2	TJU_CMC_MD2.ID03112.5p-miR	Ago_9166		RP11-1080G15.2
JHU_ID_23015	JHU_ID_23015.5p	JHU_ID_23015.3p	agcuccuccucucccgggucg	gagacgggagaggaggaacc	agcuccuccucucccgggucgccgucugacuuaaacgcgugagacgggagaggaggaacc	chr8:42052297-42052357	Blood	SRR1949844	129	122	0	7	TJU_CMC_MD2.ID03141.3p-miR	Ago_9304
JHU_ID_23064	JHU_ID_23064.3p	JHU_ID_23064.5p	uccgcugcagccccucgacgu	gccgagaggcgccgcagcgggagg	gccgagaggcgccgcagcgggagggugaguuccagccuccgcugcagccccucgacgu	chr8:55880664-55880722	Macrophage	SRR1532974	578	576	0	2		Ago_9368		LYN
JHU_ID_23077	JHU_ID_23077.5p	JHU_ID_23077.3p	auggccaaugaguaccugaac	uccagguacucauuggcuguua	uccagguacucauuggcuguuagauuacaccuaauggccaaugaguaccugaac	chr8:58849907-58849961	Lung Adenocarcinoma	SRR1304309	361	311	0	50		Ago_9377
JHU_ID_23098	JHU_ID_23098.5p	JHU_ID_23098.3p	uaaguguaguuaguccuggauu	uccaggacuaacuacacuuaau	uccaggacuaacuacacuuaauuuucuugaauuaauuaaguguaguuaguccuggauu	chr8:64438602-64438660	Retina	ERR973614	3208	2497	0	711		Ago_9396			MIR124-2
JHU_ID_23120	JHU_ID_23120.5p	JHU_ID_23120.3p	uuggcuaacccaaaacagagacu	ugucuguugugggugagcuguu	ugucuguugugggugagcuguugcagcauagacuucacauuggcuaacccaaaacagagacu	chr8:70217147-70217209	Colon adenocarcinoma	SRR1917330	177	144	0	33	TJU_CMC_MD2.ID03152.3p-miR	Ago_9421		NCOA2
JHU_ID_23142	JHU_ID_23142.5p	JHU_ID_23142.3p	aggcucuggugcuuucugucu	acugagguccacagagccagcu	aggcucuggugcuuucugucucugucucgcuccuccaagacugagguccacagagccagcu	chr8:748328-748389	BrainPrefrontalCortex	ERR409883	627	456	1	170	TJU_CMC_MD2.ID03093.5p-miR	Ago_9061
JHU_ID_23147	JHU_ID_23147.5p	JHU_ID_23147.3p	cguaacauuccacaggcugcu	cugccuguggcauguuacaga	cguaacauuccacaggcugcuagcagcuauagauggcugccuguggcauguuacaga	chr8:76934543-76934600	Lung Adenocarcinoma	SRR1013979	568	563	0	5	TJU_CMC_MD2.ID03160.5p-miR	Ago_9459
JHU_ID_23156	JHU_ID_23156.5p	JHU_ID_23156.3p	ucggccucgcucccgccccu	gggcgggcgcggagggcgggg	gggcgggcgcggagggcgggggcgcgguccgcuagagcccucggccucgcucccgccccu	chr8:79767964-79768024	B cell lymphoblastoid	SRR1304313	349	301	40	8	TJU_CMC_MD2.ID03163.3p-miR	Ago_9466
JHU_ID_23234	JHU_ID_23234.5p	JHU_ID_23234.3p	uuauccuccaguagacuaggga	ccagccuacuggaggauaagagg	ccagccuacuggaggauaagaggauauaaaggucucuuauccuccaguagacuaggga	chr8:98393666-98393724	Colon adenocarcinoma	SRR1917329	13887	13115	0	772	TJU_CMC_MD2.ID03170.3p-miR	Ago_9542
JHU_ID_23259	JHU_ID_23259.5p	JHU_ID_23259.3p	uguggcaccgaggcagcucucugc	agaggcugcgcggcgccgggc	agaggcugcgcggcgccgggcuuauuuagcuguggcaccgaggcagcucucugc	chr9:105244349-105244403	Colon adenocarcinoma	SRR1917329	282	281	0	1		Ago_10411
JHU_ID_23404	JHU_ID_23404.5p	JHU_ID_23404.3p	uucaaagcuuggcucugccaccu	uuggcagagccccagccuuggagc	uuggcagagccccagccuuggagccaaucagaccaggguucaaagcuuggcucugccaccu	chr9:124248144-124248205	Cervical cancer	SRR1304304	180	177	0	3	TJU_CMC_MD2.ID03326.3p-miR	Ago_10552
JHU_ID_23424	JHU_ID_23424.5p	JHU_ID_23424.3p	gaggaggcggcgcggcggccg	ggcgcugaggagcaaguugc	ggcgcugaggagcaaguugcgcggggccgcccggcggggcgcgcggcggcgaggaggcggcgcggcggccg	chr9:125747086-125747157	B cell lymphoblastoid	SRR1304313	65	60	0	5		Ago_10593
JHU_ID_23427	JHU_ID_23427.5p	JHU_ID_23427.3p	gccuccuguaacgggcucuggc	gcgagccccuugcuguauggagc	gcgagccccuugcuguauggagccuuguuucagaaaggggccuccuguaacgggcucuggc	chr9:126440134-126440195	Colon adenocarcinoma	SRR1917330	325	305	0	20	TJU_CMC_MD2.ID03333.3p-miR	Ago_10603
JHU_ID_23487	JHU_ID_23487.5p	JHU_ID_23487.3p	ccaggugucuuccauucugucc	acaggaugccagcacccaagggc	acaggaugccagcacccaagggcacugacuuccauccagcccaggugucuuccauucugucc	chr9:128255526-128255588	Colon adenocarcinoma	SRR1917336	195	182	0	13	TJU_CMC_MD2.ID03340.3p-miR	Ago_10647
JHU_ID_23703	JHU_ID_23703.3p	JHU_ID_23703.5p	aaucggccuguggcaugcaguc	cugcaugucacaggcagauucc	cugcaugucacaggcagauuccugggcuccaccucagggacugagggacucaggaaucggccuguggcaugcaguc	chr9:134137091-134137167	Cervical cancer	SRR1532965	481	480	0	1	TJU_CMC_MD2.ID03364.3p-miR	Ago_10771		WDR5
JHU_ID_23716	JHU_ID_23716.5p	JHU_ID_23716.3p	uggcucagcuccaauucugcccacg	uggggcuggggcugggccacc	uggcucagcuccaauucugcccacguuggcuuuugggguucaagguggggcuggggcugggccacc	chr9:134355079-134355145	Colon adenocarcinoma	SRR1917329	116	115	0	1		Ago_10778		RXRA
JHU_ID_23769	JHU_ID_23769.5p	JHU_ID_23769.3p	uccccgccccagggcucccgcu	agcagcugggcaggcgggcug	uccccgccccagggcucccgcuccguuugcugcauucgcggagcagcugggcaggcgggcug	chr9:136051796-136051858	Biliosphere	ERR842917	312	275	0	37		Ago_10807		NACC2
JHU_ID_23828	JHU_ID_23828.5p	JHU_ID_23828.3p	uggacacugaccaggacc	cccuggccuggauccaug	cccuggccuggauccaugcugggcagaagcagcuggacacugaccaggacc	chr9:136671487-136671538	Lung	SRR372650	3892	3871	0	21	TJU_CMC_MD2.ID03381.5p-miR	Ago_10840		EGFL7	MIR126
JHU_ID_23902	JHU_ID_23902.5p	JHU_ID_23902.3p	cgggggcuaggugggcaggggcugc	agccccuggcuuccucccccagg	cgggggcuaggugggcaggggcugccgucacccucucacggcccucuucagccccuggcuuccucccccagg	chr9:137454442-137454514	BrainPrefrontalCortex	ERR409878	59	51	0	8		Ago_10878		NSMF	MIR7114
JHU_ID_23985	JHU_ID_23985.5p	JHU_ID_23985.3p	uuucacugaugugcuccacuuc	auggagcacaccagugaaaggu	auggagcacaccagugaaagguuaaguucacccuuucacugaugugcuccacuuc	chr9:33108699-33108754	Colon adenocarcinoma	SRR1917329	180	165	0	15	TJU_CMC_MD2.ID03255.5p-miR	Ago_10052		B4GALT1
JHU_ID_24105	JHU_ID_24105.5p	JHU_ID_24105.3p	agagcaaagaaccugagugccu	gcacucagguucuuuguucuuu	agagcaaagaaccugagugccuguggugugcuggagguguaauaaggcacucagguucuuuguucuuu	chr9:42435995-42436063	Lung Adenocarcinoma	SRR1304309	3270	3225	0	45		Ago_10154
JHU_ID_24129	JHU_ID_24129.5p	JHU_ID_24129.3p	agagcaaagaaccugagugccu	gcacucagguucuuuguucuuu	agagcaaagaaccugagugccugugguaugcuggagguguaauaaggcacucagguucuuuguucuuu	chr9:62662728-62662796	Lung Adenocarcinoma	SRR1304309	3119	3074	0	45		Ago_10165
JHU_ID_24159	JHU_ID_24159.5p	JHU_ID_24159.3p	agagcaaagaaccugagugccu	gcacucagguucuuuguucuuu	agagcaaagaaccugagugccugugguaugcuggagguguaauaaggcacucagguucuuuguucuuu	chr9:66697259-66697327	Lung Adenocarcinoma	SRR1304309	3119	3074	0	45		Ago_10185
JHU_ID_24233	JHU_ID_24233.5p	JHU_ID_24233.3p	ucucugacuuccuccuuuucaggu	auggagguggaagucagagaua	ucucugacuuccuccuuuucaggucucugacaucuucuagagauggagguggaagucagagaua	chr9:85986451-85986515	Colon adenocarcinoma	SRR1917330	155	143	0	12	TJU_CMC_MD2.ID03281.3p-miR	Ago_10263		NAA35
JHU_ID_24313	JHU_ID_24313.5p	JHU_ID_24313.3p	ucucagucuccugugcagaccug	agguuuguccggagacuga	ucucagucuccugugcagaccuguuucaacucccuguacagguuuguccggagacuga	chr9:92738595-92738653	Colon adenocarcinoma	SRR1917329	274	264	0	10	TJU_CMC_MD2.ID03296.3p-miR	Ago_10311		BICD2
JHU_ID_24342	JHU_ID_24342.5p	JHU_ID_24342.3p	cggggcacucgggucuuugcugg	ugcugggacucgggcucccaggg	ugcugggacucgggcucccagggucugcucggucucucucggggcacucgggucuuugcugg	chr9:93566815-93566877	Neuron iPSC	SRR1777161	368	348	0	20		Ago_10327
JHU_ID_24406	JHU_ID_24406.5p	JHU_ID_24406.3p	uccgcggcccucuccugugcg	cgcgggaagggcggcggggc	cgcgggaagggcggcggggcgggucgaggaagcuccgcggcccucuccugugcg	chr9:98056551-98056605	Macrophage	SRR1532975	397	390	0	7	TJU_CMC_MD2.ID03304.3p-miR	Ago_10380
JHU_ID_24416	JHU_ID_24416.5p	JHU_ID_24416.3p	aagcuauacugucauggugacu	ucaacugugacagagagaagugaag	ucaacugugacagagagaagugaagaaaacuggccacagauauguagcagagccaggcaagcuauacugucauggugacu	chr9:99019620-99019700	Placenta	SRR567638	200	168	14	18		Ago_10388		COL15A1
JHU_ID_24434	JHU_ID_24434.5p	JHU_ID_24434.3p	gggguuuugcaguccuuagc	gggcuuugaaggcucuuggu	gggguuuugcaguccuuagcuguuacagaaauuaaguauugcaacuuacugagggcuuugaaggcucuuggu	chrM:5532-5604	Lung	SRR1608271	1406	1374	18	14		Ago_21903		MT-TW
JHU_ID_24551	JHU_ID_24551.3p	JHU_ID_24551.5p	ccgcccccgccacccuucucu	cagagggcggugguggcgccu	cagagggcggugguggcgccuuccugccgaguccgaggccgcccccgccacccuucucu	chrX:129931732-129931791	Platelet	SRR1592247	80	79	0	1	TJU_CMC_MD2.ID03465.3p-miR	Ago_21693
JHU_ID_24578	JHU_ID_24578.3p	JHU_ID_24578.5p	cugccggcccagaacugagcuccu	gugguucagggaaggcugccuggcu	gugguucagggaaggcugccuggcuugauucuguagcugccggcccagaacugagcuccu	chrX:135036352-135036412	Cervical cancer	SRR1304304	502	500	0	2		Ago_21727
JHU_ID_24655	JHU_ID_24655.5p	JHU_ID_24655.3p	ggauguacugaacugggucaga	uggcccaguucaguacauccc	uggcccaguucaguacauccccacaaaauguuacuagggggauguacugaacugggucaga	chrX:153335470-153335531	Adrenal	SRR944034	181	176	0	5	TJU_CMC_MD2.ID03479.3p-miR	Ago_21776		ZNF275
JHU_ID_24683	JHU_ID_24683.3p	JHU_ID_24683.5p	ugggugggcagguggaccgggu	gccccgcagccugccaaug	gccccgcagccugccaauggcuccggccugccacaguucguggugaguccgugcccugggugggcagguggaccgggu	chrX:153774303-153774381	Biliosphere	ERR842904	305	262	0	43		Ago_21785		PLXNB3
JHU_ID_24714	JHU_ID_24714.5p	JHU_ID_24714.3p	cgagggacuccuggccaguguuc	gugcuggccucagucccuggcc	cgagggacuccuggccaguguucccaacagugucugagugcuggccucagucccuggcc	chrX:154346174-154346233	Platelet	SRR1592246	209	208	0	1		Ago_21800
JHU_ID_24755	JHU_ID_24755.5p	JHU_ID_24755.3p	uaccagugaggcugacagauga	ucugucagccucauugguagc	ucugucagccucauugguagcaacuaccucaugggugcuaccagugaggcugacagauga	chrX:15492047-15492107	Lung squamous carcinoma	SRR1013976	562	417	0	145	TJU_CMC_MD2.ID03415.5p-miR	Ago_21285		BMX
JHU_ID_24908	JHU_ID_24908.5p	JHU_ID_24908.3p	cccuggggcggcagguggguugc	gacccuccauguccccccagggug	cccuggggcggcagguggguugcauggagccaggcugacccuccauguccccccagggug	chrX:48814906-48814966	Platelet	SRR1592249	104	103	0	1	TJU_CMC_MD2.ID03432.3p-miR	Ago_21423		HDAC6
JHU_ID_25111	JHU_ID_25111.5p	JHU_ID_25111.3p	uaauuucugaugcucuucccc	ugguaggagcuaucagaacuuagu	ugguaggagcuaucagaacuuagugaucaagugaagucguaguuacuaauuucugaugcucuucccc	chr1:171591080-171591147	Colon adenocarcinoma	SRR1917335	647	474	1	172	TJU_CMC_MD2.ID00237.5p-miR	Ago_1612	Ortholog
JHU_ID_25112	JHU_ID_25112.5p	JHU_ID_25112.3p	caaagagcugugguagaa	cucuucaggucuagaac	cucuucaggucuagaacaagagcaaacaaagagcugugguagaa	chr10:101902577-101902621	Neuron iPSC	SRR1777163	497	357	0	140	TJU_CMC_MD2.ID00419.3p-miR	Ago_11553	Ortholog
JHU_ID_25114	JHU_ID_25114.5p	JHU_ID_25114.3p	ucuggcugcuauggcccccucc	aggugccauucugagggccaggagu	aggugccauucugagggccaggaguuugauuaugugucacucuggcugcuauggcccccucc	chr10:97875822-97875884	HUVEC	SRR5127213	5974	5213	1	760	TJU_CMC_MD2.ID00410.3p-miR	Ago_11525	Ortholog
JHU_ID_25123	JHU_ID_25123.5p	JHU_ID_25123.3p	ucuagggaagagaagguugggug	cccuuuccucucugccccauagggu	cccuuuccucucugccccauaggguguagcucuaacuacccucuagggaagagaagguugggug	chr12:86745075-86745139	BrainPrefrontalCortex	ERR409878	17125	16988	0	137	TJU_CMC_MD2.ID00726.3p-miR	Ago_13596	Ortholog
JHU_ID_25130	JHU_ID_25130.5p	JHU_ID_25130.3p	guuuuuuauucugagugacacu	agugucacucagaauuaaaaa	agugucacucagaauuaaaaaauaauaaaugcugucugucaaggugacauuguuuuuuauucugagugacacu	chr15:75012414-75012487	Retina	ERR973612	203	201	0	2		Ago_15481	Ortholog
JHU_ID_25137	JHU_ID_25137.3p	JHU_ID_25137.5p	acuaccggccuguuucucuccuagg	augggcgggaauucagagccaguc	augggcgggaauucagagccagucagggcacgcgagugacuaccggccuguuucucuccuagg	chr17:82024631-82024694	Lung cancer	SRR1013983	221	197	0	24		Ago_17871	Ortholog
JHU_ID_25146	JHU_ID_25146.5p	JHU_ID_25146.3p	uuauaguaucccaccuacccug	agguggguggaauaguauaaca	agguggguggaauaguauaacaauaugcuaaauguuguuauaguaucccaccuacccug	chr4:157360142-157360201	Neuron Dopaminergic	SRR5127234	103	99	0	4		Ago_5640	Ortholog
JHU_ID_25147	JHU_ID_25147.5p	JHU_ID_25147.3p	ucauuuagaaaccuuuuagaga	uuuaaaaggcuguuaaauggug	uuuaaaaggcuguuaaauggugauacuauauuuuuuaacaucaacaucauuuagaaaccuuuuagaga	chr5:78056650-78056718	Stromal cell Prostate	SRR5127226	326	323	0	3		Ago_6118	Ortholog
JHU_ID_25154	JHU_ID_25154.5p	JHU_ID_25154.3p	aaagguacaguacugugauaacuga	ucgguuaucaugguaccgaug	ucgguuaucaugguaccgaugcuguauaucugaaagguacaguacugugauaacuga	chr9:4850308-4850365	Lung	SRR372616	442	436	3	3	TJU_CMC_MD2.ID03234.5p-miR	Ago_9960	Ortholog
