# Supplementary material for: Toward the human cellular microRNAome
Source: HighWire-hosted journal article supplement (doi:10.1101/gr.222067.117), 2017-09-06
Supplement: Supplemental_Table_S11.xlsx [file Supplemental_Table_S11.xlsx]

## Sheet: Sheet1
microRNA	miRBase v21 Canonical Sequence	Actual Canonical Sequence (by % abundance)	Samples evaluated	C-4	C-3	C-2	C-1	Canonical	C+1	C+2	C+3	C+4	C-4	C-3	C-2	C-1	Canonical	C+1	C+2	C+3	C+4
hsa-miR-20a-5p	TAAAGTGCTTATAGTGCAGGTAG	TAAAGTGCTTATAGTGCAGGTAG	92	0	0	0	0	92	0	0	0	0	0	0	0	0	1	0	0	0	0
hsa-miR-361-5p	TTATCAGAATCTCCAGGGGTAC	TTATCAGAATCTCCAGGGGTAC	87	0	0	0	0	87	0	0	0	0	0	0	0	0	1	0	0	0	0
hsa-miR-30b-5p	TGTAAACATCCTACACTCAGCT	TGTAAACATCCTACACTCAGCT	82	0	0	0	0	82	0	0	0	0	0	0	0	0	1	0	0	0	0
hsa-miR-181a-3p	ACCATCGACCGTTGATTGTACC	ACCATCGACCGTTGATTGTACC	71	0	0	0	0	71	0	0	0	0	0	0	0	0	1	0	0	0	0
hsa-miR-125b-2-3p	TCACAAGTCAGGCTCTTGGGAC	TCACAAGTCAGGCTCTTGGGAC	62	0	0	0	0	62	0	0	0	0	0	0	0	0	1	0	0	0	0
hsa-miR-30a-3p	CTTTCAGTCGGATGTTTGCAGC	CTTTCAGTCGGATGTTTGCAGC	62	0	0	0	0	62	0	0	0	0	0	0	0	0	1	0	0	0	0
hsa-miR-335-3p	TTTTTCATTATTGCTCCTGACC	TTTTTCATTATTGCTCCTGACC	60	0	0	0	0	60	0	0	0	0	0	0	0	0	1	0	0	0	0
hsa-miR-411-5p	TAGTAGACCGTATAGCGTACG	TAGTAGACCGTATAGCGTACG	59	0	0	0	0	59	0	0	0	0	0	0	0	0	1	0	0	0	0
hsa-miR-374a-3p	CTTATCAGATTGTATTGTAATT	CTTATCAGATTGTATTGTAATT	57	0	0	0	0	57	0	0	0	0	0	0	0	0	1	0	0	0	0
hsa-miR-132-3p	TAACAGTCTACAGCCATGGTCG	TAACAGTCTACAGCCATGGTCG	48	0	0	0	0	48	0	0	0	0	0	0	0	0	1	0	0	0	0
hsa-miR-381-3p	TATACAAGGGCAAGCTCTCTGT	TATACAAGGGCAAGCTCTCTGT	48	0	0	0	0	48	0	0	0	0	0	0	0	0	1	0	0	0	0
hsa-miR-410-3p	AATATAACACAGATGGCCTGT	AATATAACACAGATGGCCTGT	44	0	0	0	0	44	0	0	0	0	0	0	0	0	1	0	0	0	0
hsa-miR-136-3p	CATCATCGTCTCAAATGAGTCT	CATCATCGTCTCAAATGAGTCT	43	0	0	0	0	43	0	0	0	0	0	0	0	0	1	0	0	0	0
hsa-miR-301b-3p	CAGTGCAATGATATTGTCAAAGC	CAGTGCAATGATATTGTCAAAGC	41	0	0	0	0	41	0	0	0	0	0	0	0	0	1	0	0	0	0
hsa-miR-193a-5p	TGGGTCTTTGCGGGCGAGATGA	TGGGTCTTTGCGGGCGAGATGA	36	0	0	0	0	36	0	0	0	0	0	0	0	0	1	0	0	0	0
hsa-miR-199b-5p	CCCAGTGTTTAGACTATCTGTTC	CCCAGTGTTTAGACTATCTGTTC	34	0	0	0	0	34	0	0	0	0	0	0	0	0	1	0	0	0	0
hsa-miR-20b-5p	CAAAGTGCTCATAGTGCAGGTAG	CAAAGTGCTCATAGTGCAGGTAG	30	0	0	0	0	30	0	0	0	0	0	0	0	0	1	0	0	0	0
hsa-miR-493-5p	TTGTACATGGTAGGCTTTCATT	TTGTACATGGTAGGCTTTCATT	28	0	0	0	0	28	0	0	0	0	0	0	0	0	1	0	0	0	0
hsa-miR-889-3p	TTAATATCGGACAACCATTGT	TTAATATCGGACAACCATTGT	28	0	0	0	0	28	0	0	0	0	0	0	0	0	1	0	0	0	0
hsa-miR-140-5p	CAGTGGTTTTACCCTATGGTAG	CAGTGGTTTTACCCTATGGTAG	27	0	0	0	0	27	0	0	0	0	0	0	0	0	1	0	0	0	0
hsa-miR-27b-5p	AGAGCTTAGCTGATTGGTGAAC	AGAGCTTAGCTGATTGGTGAAC	27	0	0	0	0	27	0	0	0	0	0	0	0	0	1	0	0	0	0
hsa-miR-409-5p	AGGTTACCCGAGCAACTTTGCAT	AGGTTACCCGAGCAACTTTGCAT	27	0	0	0	0	27	0	0	0	0	0	0	0	0	1	0	0	0	0
hsa-miR-370-3p	GCCTGCTGGGGTGGAACCTGGT	GCCTGCTGGGGTGGAACCTGGT	26	0	0	0	0	26	0	0	0	0	0	0	0	0	1	0	0	0	0
hsa-miR-100-3p	CAAGCTTGTATCTATAGGTATG	CAAGCTTGTATCTATAGGTATG	25	0	0	0	0	25	0	0	0	0	0	0	0	0	1	0	0	0	0
hsa-miR-138-5p	AGCTGGTGTTGTGAATCAGGCCG	AGCTGGTGTTGTGAATCAGGCCG	25	0	0	0	0	25	0	0	0	0	0	0	0	0	1	0	0	0	0
hsa-miR-145-5p	GTCCAGTTTTCCCAGGAATCCCT	GTCCAGTTTTCCCAGGAATCCCT	25	0	0	0	0	25	0	0	0	0	0	0	0	0	1	0	0	0	0
hsa-miR-18a-5p	TAAGGTGCATCTAGTGCAGATAG	TAAGGTGCATCTAGTGCAGATAG	25	0	0	0	0	25	0	0	0	0	0	0	0	0	1	0	0	0	0
hsa-miR-365b-3p	TAATGCCCCTAAAAATCCTTAT	TAATGCCCCTAAAAATCCTTAT	25	0	0	0	0	25	0	0	0	0	0	0	0	0	1	0	0	0	0
hsa-miR-493-3p	TGAAGGTCTACTGTGTGCCAGG	TGAAGGTCTACTGTGTGCCAGG	24	0	0	0	0	24	0	0	0	0	0	0	0	0	1	0	0	0	0
hsa-miR-148a-5p	AAAGTTCTGAGACACTCCGACT	AAAGTTCTGAGACACTCCGACT	22	0	0	0	0	22	0	0	0	0	0	0	0	0	1	0	0	0	0
hsa-miR-539-3p	ATCATACAAGGACAATTTCTTT	ATCATACAAGGACAATTTCTTT	22	0	0	0	0	22	0	0	0	0	0	0	0	0	1	0	0	0	0
hsa-miR-200c-3p	TAATACTGCCGGGTAATGATGGA	TAATACTGCCGGGTAATGATGGA	21	0	0	0	0	21	0	0	0	0	0	0	0	0	1	0	0	0	0
hsa-miR-129-5p	CTTTTTGCGGTCTGGGCTTGC	CTTTTTGCGGTCTGGGCTTGC	19	0	0	0	0	19	0	0	0	0	0	0	0	0	1	0	0	0	0
hsa-miR-132-5p	ACCGTGGCTTTCGATTGTTACT	ACCGTGGCTTTCGATTGTTACT	18	0	0	0	0	18	0	0	0	0	0	0	0	0	1	0	0	0	0
hsa-miR-1-3p	TGGAATGTAAAGAAGTATGTAT	TGGAATGTAAAGAAGTATGTAT	18	0	0	0	0	18	0	0	0	0	0	0	0	0	1	0	0	0	0
hsa-miR-302a-5p	ACTTAAACGTGGATGTACTTGCT	ACTTAAACGTGGATGTACTTGCT	18	0	0	0	0	18	0	0	0	0	0	0	0	0	1	0	0	0	0
hsa-miR-375	TTTGTTCGTTCGGCTCGCGTGA	TTTGTTCGTTCGGCTCGCGTGA	18	0	0	0	0	18	0	0	0	0	0	0	0	0	1	0	0	0	0
hsa-miR-378a-5p	CTCCTGACTCCAGGTCCTGTGT	CTCCTGACTCCAGGTCCTGTGT	18	0	0	0	0	18	0	0	0	0	0	0	0	0	1	0	0	0	0
hsa-miR-511-5p	GTGTCTTTTGCTCTGCAGTCA	GTGTCTTTTGCTCTGCAGTCA	18	0	0	0	0	18	0	0	0	0	0	0	0	0	1	0	0	0	0
hsa-miR-376c-3p	AACATAGAGGAAATTCCACGT	AACATAGAGGAAATTCCACGT	17	0	0	0	0	17	0	0	0	0	0	0	0	0	1	0	0	0	0
hsa-miR-1249-3p	ACGCCCTTCCCCCCCTTCTTCA	ACGCCCTTCCCCCCCTTCTTCA	16	0	0	0	0	16	0	0	0	0	0	0	0	0	1	0	0	0	0
hsa-miR-212-5p	ACCTTGGCTCTAGACTGCTTACT	ACCTTGGCTCTAGACTGCTTACT	16	0	0	0	0	16	0	0	0	0	0	0	0	0	1	0	0	0	0
hsa-miR-542-3p	TGTGACAGATTGATAACTGAAA	TGTGACAGATTGATAACTGAAA	16	0	0	0	0	16	0	0	0	0	0	0	0	0	1	0	0	0	0
hsa-miR-1298-5p	TTCATTCGGCTGTCCAGATGTA	TTCATTCGGCTGTCCAGATGTA	15	0	0	0	0	15	0	0	0	0	0	0	0	0	1	0	0	0	0
hsa-miR-139-5p	TCTACAGTGCACGTGTCTCCAGT	TCTACAGTGCACGTGTCTCCAGT	15	0	0	0	0	15	0	0	0	0	0	0	0	0	1	0	0	0	0
hsa-miR-145-3p	GGATTCCTGGAAATACTGTTCT	GGATTCCTGGAAATACTGTTCT	14	0	0	0	0	14	0	0	0	0	0	0	0	0	1	0	0	0	0
hsa-miR-150-5p	TCTCCCAACCCTTGTACCAGTG	TCTCCCAACCCTTGTACCAGTG	14	0	0	0	0	14	0	0	0	0	0	0	0	0	1	0	0	0	0
hsa-miR-219a-2-3p	AGAATTGTGGCTGGACATCTGT	AGAATTGTGGCTGGACATCTGT	14	0	0	0	0	14	0	0	0	0	0	0	0	0	1	0	0	0	0
hsa-miR-433-3p	ATCATGATGGGCTCCTCGGTGT	ATCATGATGGGCTCCTCGGTGT	13	0	0	0	0	13	0	0	0	0	0	0	0	0	1	0	0	0	0
hsa-miR-548k	AAAAGTACTTGCGGATTTTGCT	AAAAGTACTTGCGGATTTTGCT	13	0	0	0	0	13	0	0	0	0	0	0	0	0	1	0	0	0	0
hsa-miR-30c-2-3p	CTGGGAGAAGGCTGTTTACTCT	CTGGGAGAAGGCTGTTTACTCT	12	0	0	0	0	12	0	0	0	0	0	0	0	0	1	0	0	0	0
hsa-miR-30d-3p	CTTTCAGTCAGATGTTTGCTGC	CTTTCAGTCAGATGTTTGCTGC	12	0	0	0	0	12	0	0	0	0	0	0	0	0	1	0	0	0	0
hsa-miR-337-3p	CTCCTATATGATGCCTTTCTTC	CTCCTATATGATGCCTTTCTTC	12	0	0	0	0	12	0	0	0	0	0	0	0	0	1	0	0	0	0
hsa-miR-7974	AGGCTGTGATGCTCTCCTGAGCCC	AGGCTGTGATGCTCTCCTGAGCCC	12	0	0	0	0	12	0	0	0	0	0	0	0	0	1	0	0	0	0
hsa-miR-96-5p	TTTGGCACTAGCACATTTTTGCT	TTTGGCACTAGCACATTTTTGCT	12	0	0	0	0	12	0	0	0	0	0	0	0	0	1	0	0	0	0
hsa-miR-184	TGGACGGAGAACTGATAAGGGT	TGGACGGAGAACTGATAAGGGT	11	0	0	0	0	11	0	0	0	0	0	0	0	0	1	0	0	0	0
hsa-miR-194-5p	TGTAACAGCAACTCCATGTGGA	TGTAACAGCAACTCCATGTGGA	11	0	0	0	0	11	0	0	0	0	0	0	0	0	1	0	0	0	0
hsa-miR-214-5p	TGCCTGTCTACACTTGCTGTGC	TGCCTGTCTACACTTGCTGTGC	11	0	0	0	0	11	0	0	0	0	0	0	0	0	1	0	0	0	0
hsa-miR-654-5p	TGGTGGGCCGCAGAACATGTGC	TGGTGGGCCGCAGAACATGTGC	11	0	0	0	0	11	0	0	0	0	0	0	0	0	1	0	0	0	0
hsa-miR-206	TGGAATGTAAGGAAGTGTGTGG	TGGAATGTAAGGAAGTGTGTGG	10	0	0	0	0	10	0	0	0	0	0	0	0	0	1	0	0	0	0
hsa-miR-27a-5p	AGGGCTTAGCTGCTTGTGAGCA	AGGGCTTAGCTGCTTGTGAGCA	10	0	0	0	0	10	0	0	0	0	0	0	0	0	1	0	0	0	0
hsa-miR-485-3p	GTCATACACGGCTCTCCTCTCT	GTCATACACGGCTCTCCTCTCT	10	0	0	0	0	10	0	0	0	0	0	0	0	0	1	0	0	0	0
hsa-miR-561-5p	ATCAAGGATCTTAAACTTTGCC	ATCAAGGATCTTAAACTTTGCC	10	0	0	0	0	10	0	0	0	0	0	0	0	0	1	0	0	0	0
hsa-miR-141-5p	CATCTTCCAGTACAGTGTTGGA	CATCTTCCAGTACAGTGTTGGA	8	0	0	0	0	8	0	0	0	0	0	0	0	0	1	0	0	0	0
hsa-miR-26a-2-3p	CCTATTCTTGATTACTTGTTTC	CCTATTCTTGATTACTTGTTTC	8	0	0	0	0	8	0	0	0	0	0	0	0	0	1	0	0	0	0
hsa-miR-7705	AATAGCTCAGAATGTCAGTTCTG	AATAGCTCAGAATGTCAGTTCTG	8	0	0	0	0	8	0	0	0	0	0	0	0	0	1	0	0	0	0
hsa-miR-1269a	CTGGACTGAGCCGTGCTACTGG	CTGGACTGAGCCGTGCTACTGG	7	0	0	0	0	7	0	0	0	0	0	0	0	0	1	0	0	0	0
hsa-miR-3607-3p	ACTGTAAACGCTTTCTGATG	ACTGTAAACGCTTTCTGATG	7	0	0	0	0	7	0	0	0	0	0	0	0	0	1	0	0	0	0
hsa-miR-3613-5p	TGTTGTACTTTTTTTTTTGTTC	TGTTGTACTTTTTTTTTTGTTC	7	0	0	0	0	7	0	0	0	0	0	0	0	0	1	0	0	0	0
hsa-miR-362-5p	AATCCTTGGAACCTAGGTGTGAGT	AATCCTTGGAACCTAGGTGTGAGT	7	0	0	0	0	7	0	0	0	0	0	0	0	0	1	0	0	0	0
hsa-miR-487a-3p	AATCATACAGGGACATCCAGTT	AATCATACAGGGACATCCAGTT	7	0	0	0	0	7	0	0	0	0	0	0	0	0	1	0	0	0	0
hsa-miR-577	TAGATAAAATATTGGTACCTG	TAGATAAAATATTGGTACCTG	7	0	0	0	0	7	0	0	0	0	0	0	0	0	1	0	0	0	0
hsa-miR-6852-5p	CCCTGGGGTTCTGAGGACATG	CCCTGGGGTTCTGAGGACATG	7	0	0	0	0	7	0	0	0	0	0	0	0	0	1	0	0	0	0
hsa-miR-873-5p	GCAGGAACTTGTGAGTCTCCT	GCAGGAACTTGTGAGTCTCCT	7	0	0	0	0	7	0	0	0	0	0	0	0	0	1	0	0	0	0
hsa-miR-296-3p	GAGGGTTGGGTGGAGGCTCTCC	GAGGGTTGGGTGGAGGCTCTCC	6	0	0	0	0	6	0	0	0	0	0	0	0	0	1	0	0	0	0
hsa-miR-664a-3p	TATTCATTTATCCCCAGCCTACA	TATTCATTTATCCCCAGCCTACA	6	0	0	0	0	6	0	0	0	0	0	0	0	0	1	0	0	0	0
hsa-miR-124-5p	CGTGTTCACAGCGGACCTTGAT	CGTGTTCACAGCGGACCTTGAT	5	0	0	0	0	5	0	0	0	0	0	0	0	0	1	0	0	0	0
hsa-miR-1251-5p	ACTCTAGCTGCCAAAGGCGCT	ACTCTAGCTGCCAAAGGCGCT	5	0	0	0	0	5	0	0	0	0	0	0	0	0	1	0	0	0	0
hsa-miR-152-5p	AGGTTCTGTGATACACTCCGACT	AGGTTCTGTGATACACTCCGACT	5	0	0	0	0	5	0	0	0	0	0	0	0	0	1	0	0	0	0
hsa-miR-153-3p	TTGCATAGTCACAAAAGTGATC	TTGCATAGTCACAAAAGTGATC	5	0	0	0	0	5	0	0	0	0	0	0	0	0	1	0	0	0	0
hsa-miR-211-5p	TTCCCTTTGTCATCCTTCGCCT	TTCCCTTTGTCATCCTTCGCCT	5	0	0	0	0	5	0	0	0	0	0	0	0	0	1	0	0	0	0
hsa-miR-216a-5p	TAATCTCAGCTGGCAACTGTGA	TAATCTCAGCTGGCAACTGTGA	5	0	0	0	0	5	0	0	0	0	0	0	0	0	1	0	0	0	0
hsa-miR-372-3p	AAAGTGCTGCGACATTTGAGCGT	AAAGTGCTGCGACATTTGAGCGT	5	0	0	0	0	5	0	0	0	0	0	0	0	0	1	0	0	0	0
hsa-miR-373-3p	GAAGTGCTTCGATTTTGGGGTGT	GAAGTGCTTCGATTTTGGGGTGT	5	0	0	0	0	5	0	0	0	0	0	0	0	0	1	0	0	0	0
hsa-miR-377-5p	AGAGGTTGCCCTTGGTGAATTC	AGAGGTTGCCCTTGGTGAATTC	5	0	0	0	0	5	0	0	0	0	0	0	0	0	1	0	0	0	0
hsa-miR-431-3p	CAGGTCGTCTTGCAGGGCTTCT	CAGGTCGTCTTGCAGGGCTTCT	5	0	0	0	0	5	0	0	0	0	0	0	0	0	1	0	0	0	0
hsa-miR-449a	TGGCAGTGTATTGTTAGCTGGT	TGGCAGTGTATTGTTAGCTGGT	5	0	0	0	0	5	0	0	0	0	0	0	0	0	1	0	0	0	0
hsa-miR-512-3p	AAGTGCTGTCATAGCTGAGGTC	AAGTGCTGTCATAGCTGAGGTC	5	0	0	0	0	5	0	0	0	0	0	0	0	0	1	0	0	0	0
hsa-miR-518b	CAAAGCGCTCCCCTTTAGAGGT	CAAAGCGCTCCCCTTTAGAGGT	5	0	0	0	0	5	0	0	0	0	0	0	0	0	1	0	0	0	0
hsa-miR-582-5p	TTACAGTTGTTCAACCAGTTACT	TTACAGTTGTTCAACCAGTTACT	5	0	0	0	0	5	0	0	0	0	0	0	0	0	1	0	0	0	0
hsa-miR-873-3p	GGAGACTGATGAGTTCCCGGGA	GGAGACTGATGAGTTCCCGGGA	5	0	0	0	0	5	0	0	0	0	0	0	0	0	1	0	0	0	0
hsa-miR-133b	TTTGGTCCCCTTCAACCAGCTA	TTTGGTCCCCTTCAACCAGCTA	4	0	0	0	0	4	0	0	0	0	0	0	0	0	1	0	0	0	0
hsa-miR-137	TTATTGCTTAAGAATACGCGTAG	TTATTGCTTAAGAATACGCGTAG	4	0	0	0	0	4	0	0	0	0	0	0	0	0	1	0	0	0	0
hsa-miR-200a-5p	CATCTTACCGGACAGTGCTGGA	CATCTTACCGGACAGTGCTGGA	4	0	0	0	0	4	0	0	0	0	0	0	0	0	1	0	0	0	0
hsa-miR-210-5p	AGCCCCTGCCCACCGCACACTG	AGCCCCTGCCCACCGCACACTG	4	0	0	0	0	4	0	0	0	0	0	0	0	0	1	0	0	0	0
hsa-miR-371a-3p	AAGTGCCGCCATCTTTTGAGTGT	AAGTGCCGCCATCTTTTGAGTGT	4	0	0	0	0	4	0	0	0	0	0	0	0	0	1	0	0	0	0
hsa-miR-383-5p	AGATCAGAAGGTGATTGTGGCT	AGATCAGAAGGTGATTGTGGCT	4	0	0	0	0	4	0	0	0	0	0	0	0	0	1	0	0	0	0
hsa-miR-515-5p	TTCTCCAAAAGAAAGCACTTTCTG	TTCTCCAAAAGAAAGCACTTTCTG	4	0	0	0	0	4	0	0	0	0	0	0	0	0	1	0	0	0	0
hsa-miR-590-3p	TAATTTTATGTATAAGCTAGT	TAATTTTATGTATAAGCTAGT	4	0	0	0	0	4	0	0	0	0	0	0	0	0	1	0	0	0	0
hsa-miR-656-3p	AATATTATACAGTCAACCTCT	AATATTATACAGTCAACCTCT	4	0	0	0	0	4	0	0	0	0	0	0	0	0	1	0	0	0	0
hsa-miR-1299	TTCTGGAATTCTGTGTGAGGGA	TTCTGGAATTCTGTGTGAGGGA	3	0	0	0	0	3	0	0	0	0	0	0	0	0	1	0	0	0	0
hsa-miR-1304-3p	TCTCACTGTAGCCTCGAACCCC	TCTCACTGTAGCCTCGAACCCC	3	0	0	0	0	3	0	0	0	0	0	0	0	0	1	0	0	0	0
hsa-miR-139-3p	TGGAGACGCGGCCCTGTTGGAGT	TGGAGACGCGGCCCTGTTGGAGT	3	0	0	0	0	3	0	0	0	0	0	0	0	0	1	0	0	0	0
hsa-miR-376a-3p	ATCATAGAGGAAAATCCACGT	ATCATAGAGGAAAATCCACGT	3	0	0	0	0	3	0	0	0	0	0	0	0	0	1	0	0	0	0
hsa-miR-3909	TGTCCTCTAGGGCCTGCAGTCT	TGTCCTCTAGGGCCTGCAGTCT	3	0	0	0	0	3	0	0	0	0	0	0	0	0	1	0	0	0	0
hsa-miR-454-5p	ACCCTATCAATATTGTCTCTGC	ACCCTATCAATATTGTCTCTGC	3	0	0	0	0	3	0	0	0	0	0	0	0	0	1	0	0	0	0
hsa-miR-519c-3p	AAAGTGCATCTTTTTAGAGGAT	AAAGTGCATCTTTTTAGAGGAT	3	0	0	0	0	3	0	0	0	0	0	0	0	0	1	0	0	0	0
hsa-miR-551b-3p	GCGACCCATACTTGGTTTCAG	GCGACCCATACTTGGTTTCAG	3	0	0	0	0	3	0	0	0	0	0	0	0	0	1	0	0	0	0
hsa-miR-628-5p	ATGCTGACATATTTACTAGAGG	ATGCTGACATATTTACTAGAGG	3	0	0	0	0	3	0	0	0	0	0	0	0	0	1	0	0	0	0
hsa-miR-885-5p	TCCATTACACTACCCTGCCTCT	TCCATTACACTACCCTGCCTCT	3	0	0	0	0	3	0	0	0	0	0	0	0	0	1	0	0	0	0
hsa-miR-935	CCAGTTACCGCTTCCGCTACCGC	CCAGTTACCGCTTCCGCTACCGC	3	0	0	0	0	3	0	0	0	0	0	0	0	0	1	0	0	0	0
hsa-let-7e-3p	CTATACGGCCTCCTAGCTTTCC	CTATACGGCCTCCTAGCTTTCC	2	0	0	0	0	2	0	0	0	0	0	0	0	0	1	0	0	0	0
hsa-miR-105-5p	TCAAATGCTCAGACTCCTGTGGT	TCAAATGCTCAGACTCCTGTGGT	2	0	0	0	0	2	0	0	0	0	0	0	0	0	1	0	0	0	0
hsa-miR-1197	TAGGACACATGGTCTACTTCT	TAGGACACATGGTCTACTTCT	2	0	0	0	0	2	0	0	0	0	0	0	0	0	1	0	0	0	0
hsa-miR-1226-3p	TCACCAGCCCTGTGTTCCCTAG	TCACCAGCCCTGTGTTCCCTAG	2	0	0	0	0	2	0	0	0	0	0	0	0	0	1	0	0	0	0
hsa-miR-125a-3p	ACAGGTGAGGTTCTTGGGAGCC	ACAGGTGAGGTTCTTGGGAGCC	2	0	0	0	0	2	0	0	0	0	0	0	0	0	1	0	0	0	0
hsa-miR-129-1-3p	AAGCCCTTACCCCAAAAAGTAT	AAGCCCTTACCCCAAAAAGTAT	2	0	0	0	0	2	0	0	0	0	0	0	0	0	1	0	0	0	0
hsa-miR-135b-3p	ATGTAGGGCTAAAAGCCATGGG	ATGTAGGGCTAAAAGCCATGGG	2	0	0	0	0	2	0	0	0	0	0	0	0	0	1	0	0	0	0
hsa-miR-153-5p	TCATTTTTGTGATGTTGCAGCT	TCATTTTTGTGATGTTGCAGCT	2	0	0	0	0	2	0	0	0	0	0	0	0	0	1	0	0	0	0
hsa-miR-200b-5p	CATCTTACTGGGCAGCATTGGA	CATCTTACTGGGCAGCATTGGA	2	0	0	0	0	2	0	0	0	0	0	0	0	0	1	0	0	0	0
hsa-miR-202-3p	AGAGGTATAGGGCATGGGAA	AGAGGTATAGGGCATGGGAA	2	0	0	0	0	2	0	0	0	0	0	0	0	0	1	0	0	0	0
hsa-miR-204-3p	GCTGGGAAGGCAAAGGGACGT	GCTGGGAAGGCAAAGGGACGT	2	0	0	0	0	2	0	0	0	0	0	0	0	0	1	0	0	0	0
hsa-miR-208b-3p	ATAAGACGAACAAAAGGTTTGT	ATAAGACGAACAAAAGGTTTGT	2	0	0	0	0	2	0	0	0	0	0	0	0	0	1	0	0	0	0
hsa-miR-219b-3p	AGAATTGCGTTTGGACAATCAGT	AGAATTGCGTTTGGACAATCAGT	2	0	0	0	0	2	0	0	0	0	0	0	0	0	1	0	0	0	0
hsa-miR-26b-3p	CCTGTTCTCCATTACTTGGCTC	CCTGTTCTCCATTACTTGGCTC	2	0	0	0	0	2	0	0	0	0	0	0	0	0	1	0	0	0	0
hsa-miR-3605-3p	CCTCCGTGTTACCTGTCCTCTAG	CCTCCGTGTTACCTGTCCTCTAG	2	0	0	0	0	2	0	0	0	0	0	0	0	0	1	0	0	0	0
hsa-miR-374b-3p	CTTAGCAGGTTGTATTATCATT	CTTAGCAGGTTGTATTATCATT	2	0	0	0	0	2	0	0	0	0	0	0	0	0	1	0	0	0	0
hsa-miR-377-3p	ATCACACAAAGGCAACTTTTGT	ATCACACAAAGGCAACTTTTGT	2	0	0	0	0	2	0	0	0	0	0	0	0	0	1	0	0	0	0
hsa-miR-412-5p	TGGTCGACCAGTTGGAAAGTAAT	TGGTCGACCAGTTGGAAAGTAAT	2	0	0	0	0	2	0	0	0	0	0	0	0	0	1	0	0	0	0
hsa-miR-486-3p	CGGGGCAGCTCAGTACAGGAT	CGGGGCAGCTCAGTACAGGAT	2	0	0	0	0	2	0	0	0	0	0	0	0	0	1	0	0	0	0
hsa-miR-488-3p	TTGAAAGGCTATTTCTTGGTC	TTGAAAGGCTATTTCTTGGTC	2	0	0	0	0	2	0	0	0	0	0	0	0	0	1	0	0	0	0
hsa-miR-5683	TACAGATGCAGATTCTCTGACTTC	TACAGATGCAGATTCTCTGACTTC	2	0	0	0	0	2	0	0	0	0	0	0	0	0	1	0	0	0	0
hsa-miR-592	TTGTGTCAATATGCGATGATGT	TTGTGTCAATATGCGATGATGT	2	0	0	0	0	2	0	0	0	0	0	0	0	0	1	0	0	0	0
hsa-miR-891a-5p	TGCAACGAACCTGAGCCACTGA	TGCAACGAACCTGAGCCACTGA	2	0	0	0	0	2	0	0	0	0	0	0	0	0	1	0	0	0	0
hsa-miR-940	AAGGCAGGGCCCCCGCTCCCC	AAGGCAGGGCCCCCGCTCCCC	2	0	0	0	0	2	0	0	0	0	0	0	0	0	1	0	0	0	0
hsa-let-7b-3p	CTATACAACCTACTGCCTTCCC	CTATACAACCTACTGCCTTCCC	1	0	0	0	0	1	0	0	0	0	0	0	0	0	1	0	0	0	0
hsa-let-7c-3p	CTGTACAACCTTCTAGCTTTCC	CTGTACAACCTTCTAGCTTTCC	1	0	0	0	0	1	0	0	0	0	0	0	0	0	1	0	0	0	0
hsa-let-7i-3p	CTGCGCAAGCTACTGCCTTGCT	CTGCGCAAGCTACTGCCTTGCT	1	0	0	0	0	1	0	0	0	0	0	0	0	0	1	0	0	0	0
hsa-miR-106a-3p	CTGCAATGTAAGCACTTCTTAC	CTGCAATGTAAGCACTTCTTAC	1	0	0	0	0	1	0	0	0	0	0	0	0	0	1	0	0	0	0
hsa-miR-1185-2-3p	ATATACAGGGGGAGACTCTCAT	ATATACAGGGGGAGACTCTCAT	1	0	0	0	0	1	0	0	0	0	0	0	0	0	1	0	0	0	0
hsa-miR-1185-5p	AGAGGATACCCTTTGTATGTT	AGAGGATACCCTTTGTATGTT	1	0	0	0	0	1	0	0	0	0	0	0	0	0	1	0	0	0	0
hsa-miR-1246	AATGGATTTTTGGAGCAGG	AATGGATTTTTGGAGCAGG	1	0	0	0	0	1	0	0	0	0	0	0	0	0	1	0	0	0	0
hsa-miR-1260a	ATCCCACCTCTGCCACCA	ATCCCACCTCTGCCACCA	1	0	0	0	0	1	0	0	0	0	0	0	0	0	1	0	0	0	0
hsa-miR-1283	TCTACAAAGGAAAGCGCTTTCT	TCTACAAAGGAAAGCGCTTTCT	1	0	0	0	0	1	0	0	0	0	0	0	0	0	1	0	0	0	0
hsa-miR-1285-3p	TCTGGGCAACAAAGTGAGACCT	TCTGGGCAACAAAGTGAGACCT	1	0	0	0	0	1	0	0	0	0	0	0	0	0	1	0	0	0	0
hsa-miR-1323	TCAAAACTGAGGGGCATTTTCT	TCAAAACTGAGGGGCATTTTCT	1	0	0	0	0	1	0	0	0	0	0	0	0	0	1	0	0	0	0
hsa-miR-133a-5p	AGCTGGTAAAATGGAACCAAAT	AGCTGGTAAAATGGAACCAAAT	1	0	0	0	0	1	0	0	0	0	0	0	0	0	1	0	0	0	0
hsa-miR-181b-3p	CTCACTGAACAATGAATGCAA	CTCACTGAACAATGAATGCAA	1	0	0	0	0	1	0	0	0	0	0	0	0	0	1	0	0	0	0
hsa-miR-18a-3p	ACTGCCCTAAGTGCTCCTTCTGG	ACTGCCCTAAGTGCTCCTTCTGG	1	0	0	0	0	1	0	0	0	0	0	0	0	0	1	0	0	0	0
hsa-miR-190a-3p	CTATATATCAAACATATTCCT	CTATATATCAAACATATTCCT	1	0	0	0	0	1	0	0	0	0	0	0	0	0	1	0	0	0	0
hsa-miR-194-3p	CCAGTGGGGCTGCTGTTATCTG	CCAGTGGGGCTGCTGTTATCTG	1	0	0	0	0	1	0	0	0	0	0	0	0	0	1	0	0	0	0
hsa-miR-2113	ATTTGTGCTTGGCTCTGTCAC	ATTTGTGCTTGGCTCTGTCAC	1	0	0	0	0	1	0	0	0	0	0	0	0	0	1	0	0	0	0
hsa-miR-211-3p	GCAGGGACAGCAAAGGGGTGC	GCAGGGACAGCAAAGGGGTGC	1	0	0	0	0	1	0	0	0	0	0	0	0	0	1	0	0	0	0
hsa-miR-2355-5p	ATCCCCAGATACAATGGACAA	ATCCCCAGATACAATGGACAA	1	0	0	0	0	1	0	0	0	0	0	0	0	0	1	0	0	0	0
hsa-miR-2682-5p	CAGGCAGTGACTGTTCAGACGTC	CAGGCAGTGACTGTTCAGACGTC	1	0	0	0	0	1	0	0	0	0	0	0	0	0	1	0	0	0	0
hsa-miR-296-5p	AGGGCCCCCCCTCAATCCTGT	AGGGCCCCCCCTCAATCCTGT	1	0	0	0	0	1	0	0	0	0	0	0	0	0	1	0	0	0	0
hsa-miR-299-5p	TGGTTTACCGTCCCACATACAT	TGGTTTACCGTCCCACATACAT	1	0	0	0	0	1	0	0	0	0	0	0	0	0	1	0	0	0	0
hsa-miR-29b-1-5p	GCTGGTTTCATATGGTGGTTTAGA	GCTGGTTTCATATGGTGGTTTAGA	1	0	0	0	0	1	0	0	0	0	0	0	0	0	1	0	0	0	0
hsa-miR-30c-1-3p	CTGGGAGAGGGTTGTTTACTCC	CTGGGAGAGGGTTGTTTACTCC	1	0	0	0	0	1	0	0	0	0	0	0	0	0	1	0	0	0	0
hsa-miR-331-5p	CTAGGTATGGTCCCAGGGATCC	CTAGGTATGGTCCCAGGGATCC	1	0	0	0	0	1	0	0	0	0	0	0	0	0	1	0	0	0	0
hsa-miR-34b-5p	TAGGCAGTGTCATTAGCTGATTG	TAGGCAGTGTCATTAGCTGATTG	1	0	0	0	0	1	0	0	0	0	0	0	0	0	1	0	0	0	0
hsa-miR-367-5p	ACTGTTGCTAATATGCAACTCT	ACTGTTGCTAATATGCAACTCT	1	0	0	0	0	1	0	0	0	0	0	0	0	0	1	0	0	0	0
hsa-miR-4443	TTGGAGGCGTGGGTTTT	TTGGAGGCGTGGGTTTT	1	0	0	0	0	1	0	0	0	0	0	0	0	0	1	0	0	0	0
hsa-miR-4775	TTAATTTTTTGTTTCGGTCACT	TTAATTTTTTGTTTCGGTCACT	1	0	0	0	0	1	0	0	0	0	0	0	0	0	1	0	0	0	0
hsa-miR-506-3p	TAAGGCACCCTTCTGAGTAGA	TAAGGCACCCTTCTGAGTAGA	1	0	0	0	0	1	0	0	0	0	0	0	0	0	1	0	0	0	0
hsa-miR-515-3p	GAGTGCCTTCTTTTGGAGCGTT	GAGTGCCTTCTTTTGGAGCGTT	1	0	0	0	0	1	0	0	0	0	0	0	0	0	1	0	0	0	0
hsa-miR-517b-3p	ATCGTGCATCCCTTTAGAGTGT	ATCGTGCATCCCTTTAGAGTGT	1	0	0	0	0	1	0	0	0	0	0	0	0	0	1	0	0	0	0
hsa-miR-519a-3p	AAAGTGCATCCTTTTAGAGTGT	AAAGTGCATCCTTTTAGAGTGT	1	0	0	0	0	1	0	0	0	0	0	0	0	0	1	0	0	0	0
hsa-miR-519b-3p	AAAGTGCATCCTTTTAGAGGTT	AAAGTGCATCCTTTTAGAGGTT	1	0	0	0	0	1	0	0	0	0	0	0	0	0	1	0	0	0	0
hsa-miR-520c-3p	AAAGTGCTTCCTTTTAGAGGGT	AAAGTGCTTCCTTTTAGAGGGT	1	0	0	0	0	1	0	0	0	0	0	0	0	0	1	0	0	0	0
hsa-miR-520g-3p	ACAAAGTGCTTCCCTTTAGAGTGT	ACAAAGTGCTTCCCTTTAGAGTGT	1	0	0	0	0	1	0	0	0	0	0	0	0	0	1	0	0	0	0
hsa-miR-521	AACGCACTTCCCTTTAGAGTGT	AACGCACTTCCCTTTAGAGTGT	1	0	0	0	0	1	0	0	0	0	0	0	0	0	1	0	0	0	0
hsa-miR-523-3p	GAACGCGCTTCCCTATAGAGGGT	GAACGCGCTTCCCTATAGAGGGT	1	0	0	0	0	1	0	0	0	0	0	0	0	0	1	0	0	0	0
hsa-miR-526b-3p	GAAAGTGCTTCCTTTTAGAGGC	GAAAGTGCTTCCTTTTAGAGGC	1	0	0	0	0	1	0	0	0	0	0	0	0	0	1	0	0	0	0
hsa-miR-545-3p	TCAGCAAACATTTATTGTGTGC	TCAGCAAACATTTATTGTGTGC	1	0	0	0	0	1	0	0	0	0	0	0	0	0	1	0	0	0	0
hsa-miR-548o-3p	CCAAAACTGCAGTTACTTTTGC	CCAAAACTGCAGTTACTTTTGC	1	0	0	0	0	1	0	0	0	0	0	0	0	0	1	0	0	0	0
hsa-miR-549a	TGACAACTATGGATGAGCTCT	TGACAACTATGGATGAGCTCT	1	0	0	0	0	1	0	0	0	0	0	0	0	0	1	0	0	0	0
hsa-miR-590-5p	GAGCTTATTCATAAAAGTGCAG	GAGCTTATTCATAAAAGTGCAG	1	0	0	0	0	1	0	0	0	0	0	0	0	0	1	0	0	0	0
hsa-miR-642a-5p	GTCCCTCTCCAAATGTGTCTTG	GTCCCTCTCCAAATGTGTCTTG	1	0	0	0	0	1	0	0	0	0	0	0	0	0	1	0	0	0	0
hsa-miR-7-1-3p	CAACAAATCACAGTCTGCCATA	CAACAAATCACAGTCTGCCATA	1	0	0	0	0	1	0	0	0	0	0	0	0	0	1	0	0	0	0
hsa-miR-877-3p	TCCTCTTCTCCCTCCTCCCAG	TCCTCTTCTCCCTCCTCCCAG	1	0	0	0	0	1	0	0	0	0	0	0	0	0	1	0	0	0	0
hsa-miR-934	TGTCTACTACTGGAGACACTGG	TGTCTACTACTGGAGACACTGG	1	0	0	0	0	1	0	0	0	0	0	0	0	0	1	0	0	0	0
hsa-miR-340-5p	TTATAAAGCAATGAGACTGATT	TTATAAAGCAATGAGACTGATT	91	0	0	0	1	90	0	0	0	0	0	0	0	0.010989	0.989011	0	0	0	0
hsa-miR-941	CACCCGGCTGTGTGCACATGTGC	CACCCGGCTGTGTGCACATGTGC	91	0	0	0	1	90	0	0	0	0	0	0	0	0.010989	0.989011	0	0	0	0
hsa-miR-769-5p	TGAGACCTCTGGGTTCTGAGCT	TGAGACCTCTGGGTTCTGAGCT	90	0	0	0	1	89	0	0	0	0	0	0	0	0.0111111	0.988889	0	0	0	0
hsa-miR-532-5p	CATGCCTTGAGTGTAGGACCGT	CATGCCTTGAGTGTAGGACCGT	87	0	0	0	1	86	0	0	0	0	0	0	0	0.0114943	0.988506	0	0	0	0
hsa-miR-301a-3p	CAGTGCAATAGTATTGTCAAAGC	CAGTGCAATAGTATTGTCAAAGC	72	0	0	0	0	71	0	1	0	0	0	0	0	0	0.986111	0	0.0138889	0	0
hsa-miR-181a-2-3p	ACCACTGACCGTTGACTGTACC	ACCACTGACCGTTGACTGTACC	68	1	0	0	0	67	0	0	0	0	0.0147059	0	0	0	0.985294	0	0	0	0
hsa-miR-146a-5p	TGAGAACTGAATTCCATGGGTT	TGAGAACTGAATTCCATGGGTT	66	0	0	0	1	65	0	0	0	0	0	0	0	0.0151515	0.984848	0	0	0	0
hsa-let-7d-3p	CTATACGACCTGCTGCCTTTCT	CTATACGACCTGCTGCCTTTCT	65	0	0	0	1	64	0	0	0	0	0	0	0	0.0153846	0.984615	0	0	0	0
hsa-miR-409-3p	GAATGTTGCTCGGTGAACCCCT	GAATGTTGCTCGGTGAACCCCT	64	0	0	0	1	63	0	0	0	0	0	0	0	0.015625	0.984375	0	0	0	0
hsa-miR-28-3p	CACTAGATTGTGAGCTCCTGGA	CACTAGATTGTGAGCTCCTGGA	114	0	0	0	2	112	0	0	0	0	0	0	0	0.0175439	0.982456	0	0	0	0
hsa-miR-125b-1-3p	ACGGGTTAGGCTCTTGGGAGCT	ACGGGTTAGGCTCTTGGGAGCT	51	0	0	0	1	50	0	0	0	0	0	0	0	0.0196078	0.980392	0	0	0	0
hsa-miR-30e-3p	CTTTCAGTCGGATGTTTACAGC	CTTTCAGTCGGATGTTTACAGC	96	0	0	0	2	94	0	0	0	0	0	0	0	0.0208333	0.979167	0	0	0	0
hsa-miR-125b-5p	TCCCTGAGACCCTAACTTGTGA	TCCCTGAGACCCTAACTTGTGA	94	0	0	0	2	92	0	0	0	0	0	0	0	0.0212766	0.978723	0	0	0	0
hsa-miR-126-5p	CATTATTACTTTTGGTACGCG	CATTATTACTTTTGGTACGCG	46	0	0	0	1	45	0	0	0	0	0	0	0	0.0217391	0.978261	0	0	0	0
hsa-miR-34c-5p	AGGCAGTGTAGTTAGCTGATTGC	AGGCAGTGTAGTTAGCTGATTGC	45	0	0	0	1	44	0	0	0	0	0	0	0	0.0222222	0.977778	0	0	0	0
hsa-miR-423-3p	AGCTCGGTCTGAGGCCCCTCAGT	AGCTCGGTCTGAGGCCCCTCAGT	122	0	0	0	3	119	0	0	0	0	0	0	0	0.0245902	0.97541	0	0	0	0
hsa-miR-103a-3p	AGCAGCATTGTACAGGGCTATGA	AGCAGCATTGTACAGGGCTATGA	121	0	2	0	1	118	0	0	0	0	0	0.0165289	0	0.00826446	0.975207	0	0	0	0
hsa-miR-142-5p	CATAAAGTAGAAAGCACTACT	CATAAAGTAGAAAGCACTACT	40	0	0	0	1	39	0	0	0	0	0	0	0	0.025	0.975	0	0	0	0
hsa-miR-22-3p	AAGCTGCCAGTTGAAGAACTGT	AAGCTGCCAGTTGAAGAACTGT	119	0	0	0	3	116	0	0	0	0	0	0	0	0.0252101	0.97479	0	0	0	0
hsa-miR-148b-3p	TCAGTGCATCACAGAACTTTGT	TCAGTGCATCACAGAACTTTGT	78	2	0	0	0	76	0	0	0	0	0.025641	0	0	0	0.974359	0	0	0	0
hsa-let-7a-5p	TGAGGTAGTAGGTTGTATAGTT	TGAGGTAGTAGGTTGTATAGTT	114	0	0	0	3	111	0	0	0	0	0	0	0	0.0263158	0.973684	0	0	0	0
hsa-let-7f-5p	TGAGGTAGTAGATTGTATAGTT	TGAGGTAGTAGATTGTATAGTT	112	0	0	0	3	109	0	0	0	0	0	0	0	0.0267857	0.973214	0	0	0	0
hsa-let-7g-5p	TGAGGTAGTAGTTTGTACAGTT	TGAGGTAGTAGTTTGTACAGTT	111	0	0	0	3	108	0	0	0	0	0	0	0	0.027027	0.972973	0	0	0	0
hsa-miR-214-3p	ACAGCAGGCACAGACAGGCAGT	ACAGCAGGCACAGACAGGCAGT	36	0	0	0	1	35	0	0	0	0	0	0	0	0.0277778	0.972222	0	0	0	0
hsa-miR-193a-3p	AACTGGCCTACAAAGTCCCAGT	AACTGGCCTACAAAGTCCCAGT	35	0	0	1	0	34	0	0	0	0	0	0	0.0285714	0	0.971429	0	0	0	0
hsa-miR-100-5p	AACCCGTAGATCCGAACTTGTG	AACCCGTAGATCCGAACTTGTG	68	0	0	0	2	66	0	0	0	0	0	0	0	0.0294118	0.970588	0	0	0	0
hsa-miR-182-5p	TTTGGCAATGGTAGAACTCACACT	TTTGGCAATGGTAGAACTCACACT	68	0	0	1	1	66	0	0	0	0	0	0	0.0147059	0.0147059	0.970588	0	0	0	0
hsa-miR-134-5p	TGTGACTGGTTGACCAGAGGGG	TGTGACTGGTTGACCAGAGGGG	34	0	0	0	1	33	0	0	0	0	0	0	0	0.0294118	0.970588	0	0	0	0
hsa-miR-328-3p	CTGGCCCTCTCTGCCCTTCCGT	CTGGCCCTCTCTGCCCTTCCGT	34	0	0	0	1	33	0	0	0	0	0	0	0	0.0294118	0.970588	0	0	0	0
hsa-miR-192-5p	CTGACCTATGAATTGACAGCC	CTGACCTATGAATTGACAGCC	101	0	0	0	1	98	2	0	0	0	0	0	0	0.00990099	0.970297	0.019802	0	0	0
hsa-miR-197-3p	TTCACCACCTTCTCCACCCAGC	TTCACCACCTTCTCCACCCAGC	96	0	0	0	3	93	0	0	0	0	0	0	0	0.03125	0.96875	0	0	0	0
hsa-miR-26a-5p	TTCAAGTAATCCAGGATAGGCT	TTCAAGTAATCCAGGATAGGCT	123	0	0	1	3	119	0	0	0	0	0	0	0.00813008	0.0243902	0.96748	0	0	0	0
hsa-miR-25-3p	CATTGCACTTGTCTCGGTCTGA	CATTGCACTTGTCTCGGTCTGA	121	0	1	0	3	117	0	0	0	0	0	0.00826446	0	0.0247934	0.966942	0	0	0	0
hsa-miR-99b-5p	CACCCGTAGAACCGACCTTGCG	CACCCGTAGAACCGACCTTGCG	117	0	0	0	4	113	0	0	0	0	0	0	0	0.034188	0.965812	0	0	0	0
hsa-miR-210-3p	CTGTGCGTGTGACAGCGGCTGA	CTGTGCGTGTGACAGCGGCTGA	58	0	0	0	2	56	0	0	0	0	0	0	0	0.0344828	0.965517	0	0	0	0
hsa-let-7i-5p	TGAGGTAGTAGTTTGTGCTGTT	TGAGGTAGTAGTTTGTGCTGTT	110	0	0	0	4	106	0	0	0	0	0	0	0	0.0363636	0.963636	0	0	0	0
hsa-miR-1180-3p	TTTCCGGCTCGCGTGGGTGTGT	TTTCCGGCTCGCGTGGGTGTGT	27	0	0	1	0	26	0	0	0	0	0	0	0.037037	0	0.962963	0	0	0	0
hsa-miR-106a-5p	AAAAGTGCTTACAGTGCAGGTAG	AAAAGTGCTTACAGTGCAGGTAG	26	0	0	0	1	25	0	0	0	0	0	0	0	0.0384615	0.961538	0	0	0	0
hsa-miR-196a-5p	TAGGTAGTTTCATGTTGTTGGG	TAGGTAGTTTCATGTTGTTGGG	26	0	0	0	0	25	1	0	0	0	0	0	0	0	0.961538	0.0384615	0	0	0
hsa-miR-487b-3p	AATCGTACAGGGTCATCCACTT	AATCGTACAGGGTCATCCACTT	26	0	0	0	1	25	0	0	0	0	0	0	0	0.0384615	0.961538	0	0	0	0
hsa-miR-98-5p	TGAGGTAGTAAGTTGTATTGTT	TGAGGTAGTAAGTTGTATTGTT	102	0	0	0	4	98	0	0	0	0	0	0	0	0.0392157	0.960784	0	0	0	0
hsa-let-7b-5p	TGAGGTAGTAGGTTGTGTGGTT	TGAGGTAGTAGGTTGTGTGGTT	100	0	0	0	3	96	1	0	0	0	0	0	0	0.03	0.96	0.01	0	0	0
hsa-miR-149-5p	TCTGGCTCCGTGTCTTCACTCCC	TCTGGCTCCGTGTCTTCACTCCC	50	0	1	1	0	48	0	0	0	0	0	0.02	0.02	0	0.96	0	0	0	0
hsa-miR-193b-3p	AACTGGCCCTCAAAGTCCCGCT	AACTGGCCCTCAAAGTCCCGCT	50	0	0	0	2	48	0	0	0	0	0	0	0	0.04	0.96	0	0	0	0
hsa-let-7c-5p	TGAGGTAGTAGGTTGTATGGTT	TGAGGTAGTAGGTTGTATGGTT	98	1	0	0	3	94	0	0	0	0	0.0102041	0	0	0.0306122	0.959184	0	0	0	0
hsa-miR-574-3p	CACGCTCATGCACACACCCACA	CACGCTCATGCACACACCCACA	49	0	0	0	2	47	0	0	0	0	0	0	0	0.0408163	0.959184	0	0	0	0
hsa-miR-92a-3p	TATTGCACTTGTCCCGGCCTGT	TATTGCACTTGTCCCGGCCTGT	122	0	0	2	3	117	0	0	0	0	0	0	0.0163934	0.0245902	0.959016	0	0	0	0
hsa-let-7d-5p	AGAGGTAGTAGGTTGCATAGTT	AGAGGTAGTAGGTTGCATAGTT	96	0	0	0	4	92	0	0	0	0	0	0	0	0.0416667	0.958333	0	0	0	0
hsa-miR-1307-5p	TCGACCGGACCTCGACCGGCT	TCGACCGGACCTCGACCGGCT	68	0	0	0	0	65	3	0	0	0	0	0	0	0	0.955882	0.0441176	0	0	0
hsa-miR-148a-3p	TCAGTGCACTACAGAACTTTGT	TCAGTGCACTACAGAACTTTGT	113	0	0	0	1	108	4	0	0	0	0	0	0	0.00884956	0.955752	0.0353982	0	0	0
hsa-miR-323a-3p	CACATTACACGGTCGACCTCT	CACATTACACGGTCGACCTCT	22	0	0	1	0	21	0	0	0	0	0	0	0.0454545	0	0.954545	0	0	0	0
hsa-miR-127-3p	TCGGATCCGTCTGAGCTTGGCT	TCGGATCCGTCTGAGCTTGGCT	87	0	0	0	4	83	0	0	0	0	0	0	0	0.045977	0.954023	0	0	0	0
hsa-let-7e-5p	TGAGGTAGGAGGTTGTATAGTT	TGAGGTAGGAGGTTGTATAGTT	107	0	0	0	5	102	0	0	0	0	0	0	0	0.046729	0.953271	0	0	0	0
hsa-miR-421	ATCAACAGACATTAATTGGGCGC	ATCAACAGACATTAATTGGGCGC	84	0	0	1	3	80	0	0	0	0	0	0	0.0119048	0.0357143	0.952381	0	0	0	0
hsa-miR-199a-5p	CCCAGTGTTCAGACTACCTGTTC	CCCAGTGTTCAGACTACCTGTTC	41	0	0	0	2	39	0	0	0	0	0	0	0	0.0487805	0.95122	0	0	0	0
hsa-miR-15b-5p	TAGCAGCACATCATGGTTTACA	TAGCAGCACATCATGGTTTACA	81	0	0	0	4	77	0	0	0	0	0	0	0	0.0493827	0.950617	0	0	0	0
hsa-miR-128-3p	TCACAGTGAACCGGTCTCTTT	TCACAGTGAACCGGTCTCTTT	101	0	0	0	2	96	3	0	0	0	0	0	0	0.019802	0.950495	0.029703	0	0	0
hsa-miR-369-3p	AATAATACATGGTTGATCTTT	AATAATACATGGTTGATCTTT	20	0	0	0	1	19	0	0	0	0	0	0	0	0.05	0.95	0	0	0	0
hsa-miR-671-3p	TCCGGTTCTCAGGGCTCCACC	TCCGGTTCTCAGGGCTCCACC	58	0	0	0	0	55	3	0	0	0	0	0	0	0	0.948276	0.0517241	0	0	0
hsa-miR-185-5p	TGGAGAGAAAGGCAGTTCCTGA	TGGAGAGAAAGGCAGTTCCTGA	38	0	0	0	2	36	0	0	0	0	0	0	0	0.0526316	0.947368	0	0	0	0
hsa-miR-212-3p	TAACAGTCTCCAGTCACGGCC	TAACAGTCTCCAGTCACGGCC	18	0	0	0	0	17	0	1	0	0	0	0	0	0	0.944444	0	0.0555556	0	0
hsa-miR-21-3p	CAACACCAGTCGATGGGCTGT	CAACACCAGTCGATGGGCTGT	88	0	0	0	1	83	4	0	0	0	0	0	0	0.0113636	0.943182	0.0454545	0	0	0
hsa-miR-378a-3p	ACTGGACTTGGAGTCAGAAGGC	ACTGGACTTGGAGTCAGAAGGC	104	0	0	1	5	98	0	0	0	0	0	0	0.00961538	0.0480769	0.942308	0	0	0	0
hsa-miR-19a-3p	TGTGCAAATCTATGCAAAACTGA	TGTGCAAATCTATGCAAAACTGA	52	0	0	0	3	49	0	0	0	0	0	0	0	0.0576923	0.942308	0	0	0	0
hsa-miR-484	TCAGGCTCAGTCCCCTCCCGAT	TCAGGCTCAGTCCCCTCCCGAT	102	0	0	0	1	96	5	0	0	0	0	0	0	0.00980392	0.941176	0.0490196	0	0	0
hsa-miR-219a-1-3p	AGAGTTGAGTCTGGACGTCCCG	AGAGTTGAGTCTGGACGTCCCG	17	0	0	0	0	16	1	0	0	0	0	0	0	0	0.941176	0.0588235	0	0	0
hsa-miR-598-3p	TACGTCATCGTTGTCATCGTCA	TACGTCATCGTTGTCATCGTCA	17	0	0	0	1	16	0	0	0	0	0	0	0	0.0588235	0.941176	0	0	0	0
hsa-miR-320a	AAAAGCTGGGTTGAGAGGGCGA	AAAAGCTGGGTTGAGAGGGCGA	116	0	0	0	3	109	4	0	0	0	0	0	0	0.0258621	0.939655	0.0344828	0	0	0
hsa-miR-217	TACTGCATCAGGAACTGATTGGA	TACTGCATCAGGAACTGATTGGA	16	1	0	0	0	15	0	0	0	0	0.0625	0	0	0	0.9375	0	0	0	0
hsa-miR-330-3p	GCAAAGCACACGGCCTGCAGAGA	GCAAAGCACACGGCCTGCAGAGA	16	0	0	0	0	15	0	1	0	0	0	0	0	0	0.9375	0	0.0625	0	0
hsa-miR-191-5p	CAACGGAATCCCAAAAGCAGCTG	CAACGGAATCCCAAAAGCAGCTG	123	0	0	1	6	115	1	0	0	0	0	0	0.00813008	0.0487805	0.934959	0.00813008	0	0	0
hsa-miR-93-5p	CAAAGTGCTGTTCGTGCAGGTAG	CAAAGTGCTGTTCGTGCAGGTAG	106	0	0	4	3	99	0	0	0	0	0	0	0.0377358	0.0283019	0.933962	0	0	0	0
hsa-miR-423-5p	TGAGGGGCAGAGAGCGAGACTTT	TGAGGGGCAGAGAGCGAGACTTT	121	0	0	5	3	113	0	0	0	0	0	0	0.0413223	0.0247934	0.933884	0	0	0	0
hsa-miR-126-3p	TCGTACCGTGAGTAATAATGCG	TCGTACCGTGAGTAATAATGCG	30	0	0	0	2	28	0	0	0	0	0	0	0	0.0666667	0.933333	0	0	0	0
hsa-miR-450a-5p	TTTTGCGATGTGTTCCTAATAT	TTTTGCGATGTGTTCCTAATAT	30	0	0	2	0	28	0	0	0	0	0	0	0.0666667	0	0.933333	0	0	0	0
hsa-miR-766-3p	ACTCCAGCCCCACAGCCTCAGC	ACTCCAGCCCCACAGCCTCAGC	15	0	0	0	1	14	0	0	0	0	0	0	0	0.0666667	0.933333	0	0	0	0
hsa-miR-9-3p	ATAAAGCTAGATAACCGAAAGT	ATAAAGCTAGATAACCGAAAGT	15	0	0	0	0	14	1	0	0	0	0	0	0	0	0.933333	0.0666667	0	0	0
hsa-miR-29c-3p	TAGCACCATTTGAAATCGGTTA	TAGCACCATTTGAAATCGGTTA	42	0	0	1	2	39	0	0	0	0	0	0	0.0238095	0.047619	0.928571	0	0	0	0
hsa-miR-16-5p	TAGCAGCACGTAAATATTGGCG	TAGCAGCACGTAAATATTGGCG	118	0	0	0	4	109	5	0	0	0	0	0	0	0.0338983	0.923729	0.0423729	0	0	0
hsa-miR-1185-1-3p	ATATACAGGGGGAGACTCTTAT	ATATACAGGGGGAGACTCTTAT	13	0	0	1	0	12	0	0	0	0	0	0	0.0769231	0	0.923077	0	0	0	0
hsa-miR-574-5p	TGAGTGTGTGTGTGTGAGTGTGT	TGAGTGTGTGTGTGTGAGTGTGT	38	0	0	1	0	35	2	0	0	0	0	0	0.0263158	0	0.921053	0.0526316	0	0	0
hsa-miR-124-3p	TAAGGCACGCGGTGAATGCC	TAAGGCACGCGGTGAATGCC	12	0	0	0	1	11	0	0	0	0	0	0	0	0.0833333	0.916667	0	0	0	0
hsa-miR-299-3p	TATGTGGGATGGTAAACCGCTT	TATGTGGGATGGTAAACCGCTT	12	0	0	0	1	11	0	0	0	0	0	0	0	0.0833333	0.916667	0	0	0	0
hsa-miR-501-3p	AATGCACCCGGGCAAGGATTCT	AATGCACCCGGGCAAGGATTCT	58	0	0	1	0	53	4	0	0	0	0	0	0.0172414	0	0.913793	0.0689655	0	0	0
hsa-miR-29b-3p	TAGCACCATTTGAAATCAGTGTT	TAGCACCATTTGAAATCAGTGTT	46	0	3	1	0	42	0	0	0	0	0	0.0652174	0.0217391	0	0.913043	0	0	0	0
hsa-miR-17-5p	CAAAGTGCTTACAGTGCAGGTAG	CAAAGTGCTTACAGTGCAGGTAG	91	0	0	0	2	83	6	0	0	0	0	0	0	0.021978	0.912088	0.0659341	0	0	0
hsa-miR-708-5p	AAGGAGCTTACAATCTAGCTGGG	AAGGAGCTTACAATCTAGCTGGG	33	0	0	0	3	30	0	0	0	0	0	0	0	0.0909091	0.909091	0	0	0	0
hsa-miR-379-5p	TGGTAGACTATGGAACGTAGG	TGGTAGACTATGGAACGTAGG	11	0	0	0	1	10	0	0	0	0	0	0	0	0.0909091	0.909091	0	0	0	0
hsa-miR-495-3p	AAACAAACATGGTGCACTTCTT	AAACAAACATGGTGCACTTCTT	11	0	0	0	0	10	1	0	0	0	0	0	0	0	0.909091	0.0909091	0	0	0
hsa-miR-135b-5p	TATGGCTTTTCATTCCTATGTGA	TATGGCTTTTCATTCCTATGTGA	19	0	0	0	2	17	0	0	0	0	0	0	0	0.105263	0.894737	0	0	0	0
hsa-miR-205-5p	TCCTTCATTCCACCGGAGTCTG	TCCTTCATTCCACCGGAGTCTG	19	0	0	0	0	17	2	0	0	0	0	0	0	0	0.894737	0.105263	0	0	0
hsa-miR-331-3p	GCCCCTGGGCCTATCCTAGAA	GCCCCTGGGCCTATCCTAGAA	65	0	0	0	7	58	0	0	0	0	0	0	0	0.107692	0.892308	0	0	0	0
hsa-miR-425-3p	ATCGGGAATGTCGTGTCCGCCC	ATCGGGAATGTCGTGTCCGCCC	27	0	0	0	3	24	0	0	0	0	0	0	0	0.111111	0.888889	0	0	0	0
hsa-miR-99b-3p	CAAGCTCGTGTCTGTGGGTCCG	CAAGCTCGTGTCTGTGGGTCCG	18	0	0	0	0	16	2	0	0	0	0	0	0	0	0.888889	0.111111	0	0	0
hsa-miR-142-3p	TGTAGTGTTTCCTACTTTATGGA	TGTAGTGTTTCCTACTTTATGGA	26	0	0	0	3	23	0	0	0	0	0	0	0	0.115385	0.884615	0	0	0	0
hsa-miR-92b-3p	TATTGCACTCGTCCCGGCCTCC	TATTGCACTCGTCCCGGCCTCC	117	0	0	11	3	103	0	0	0	0	0	0	0.0940171	0.025641	0.880342	0	0	0	0
hsa-miR-191-3p	GCTGCGCTTGGATTTCGTCCCC	GCTGCGCTTGGATTTCGTCCCC	8	0	0	0	1	7	0	0	0	0	0	0	0	0.125	0.875	0	0	0	0
hsa-miR-486-5p	TCCTGTACTGAGCTGCCCCGAG	TCCTGTACTGAGCTGCCCCGAG	84	0	0	0	11	73	0	0	0	0	0	0	0	0.130952	0.869048	0	0	0	0
hsa-miR-28-5p	AAGGAGCTCACAGTCTATTGAG	AAGGAGCTCACAGTCTATTGAG	90	0	0	0	12	78	0	0	0	0	0	0	0	0.133333	0.866667	0	0	0	0
hsa-miR-382-5p	GAAGTTGTTCGTGGTGGATTCG	GAAGTTGTTCGTGGTGGATTCG	22	0	0	2	1	19	0	0	0	0	0	0	0.0909091	0.0454545	0.863636	0	0	0	0
hsa-miR-1908-5p	CGGCGGGGACGGCGATTGGTC	CGGCGGGGACGGCGATTGGTC	7	0	0	0	1	6	0	0	0	0	0	0	0	0.142857	0.857143	0	0	0	0
hsa-miR-130b-3p	CAGTGCAATGATGAAAGGGCAT	CAGTGCAATGATGAAAGGGCAT	74	0	0	0	11	63	0	0	0	0	0	0	0	0.148649	0.851351	0	0	0	0
hsa-miR-196b-5p	TAGGTAGTTTCCTGTTGTTGGG	TAGGTAGTTTCCTGTTGTTGGG	20	0	0	0	2	17	1	0	0	0	0	0	0	0.1	0.85	0.05	0	0	0
hsa-miR-129-2-3p	AAGCCCTTACCCCAAAAAGCAT	AAGCCCTTACCCCAAAAAGCAT	13	0	0	0	2	11	0	0	0	0	0	0	0	0.153846	0.846154	0	0	0	0
hsa-miR-29a-3p	TAGCACCATCTGAAATCGGTTA	TAGCACCATCTGAAATCGGTTA	90	0	0	6	8	76	0	0	0	0	0	0	0.0666667	0.0888889	0.844444	0	0	0	0
hsa-miR-106b-5p	TAAAGTGCTGACAGTGCAGAT	TAAAGTGCTGACAGTGCAGAT	60	0	0	0	0	50	10	0	0	0	0	0	0	0	0.833333	0.166667	0	0	0
hsa-miR-429	TAATACTGTCTGGTAAAACCGT	TAATACTGTCTGGTAAAACCGT	12	0	0	0	2	10	0	0	0	0	0	0	0	0.166667	0.833333	0	0	0	0
hsa-miR-22-5p	AGTTCTTCAGTGGCAAGCTTTA	AGTTCTTCAGTGGCAAGCTTTA	6	0	0	0	1	5	0	0	0	0	0	0	0	0.166667	0.833333	0	0	0	0
hsa-miR-329-3p	AACACACCTGGTTAACCTCTTT	AACACACCTGGTTAACCTCTTT	6	0	0	0	1	5	0	0	0	0	0	0	0	0.166667	0.833333	0	0	0	0
hsa-miR-4433b-3p	CAGGAGTGGGGGGTGGGACGT	CAGGAGTGGGGGGTGGGACGT	6	0	0	0	1	5	0	0	0	0	0	0	0	0.166667	0.833333	0	0	0	0
hsa-miR-4446-3p	CAGGGCTGGCAGTGACATGGGT	CAGGGCTGGCAGTGACATGGGT	6	0	0	0	1	5	0	0	0	0	0	0	0	0.166667	0.833333	0	0	0	0
hsa-miR-532-3p	CCTCCCACACCCAAGGCTTGCA	CCTCCCACACCCAAGGCTTGCA	6	0	0	0	1	5	0	0	0	0	0	0	0	0.166667	0.833333	0	0	0	0
hsa-miR-23a-5p	GGGGTTCCTGGGGATGGGATTT	GGGGTTCCTGGGGATGGGATTT	5	0	0	0	1	4	0	0	0	0	0	0	0	0.2	0.8	0	0	0	0
hsa-miR-758-3p	TTTGTGACCTGGTCCACTAACC	TTTGTGACCTGGTCCACTAACC	24	0	0	0	5	19	0	0	0	0	0	0	0	0.208333	0.791667	0	0	0	0
hsa-miR-151a-5p	TCGAGGAGCTCACAGTCTAGT	TCGAGGAGCTCACAGTCTAGT	105	0	0	0	1	81	23	0	0	0	0	0	0	0.00952381	0.771429	0.219048	0	0	0
hsa-miR-181a-5p	AACATTCAACGCTGTCGGTGAGT	AACATTCAACGCTGTCGGTGAGT	122	0	0	1	18	94	2	7	0	0	0	0	0.00819672	0.147541	0.770492	0.0163934	0.057377	0	0
hsa-miR-216b-5p	AAATCTCTGCAGGCAAATGTGA	AAATCTCTGCAGGCAAATGTGA	16	0	0	0	4	12	0	0	0	0	0	0	0	0.25	0.75	0	0	0	0
hsa-miR-193b-5p	CGGGGTTTTGAGGGCGAGATGA	CGGGGTTTTGAGGGCGAGATGA	8	0	0	0	2	6	0	0	0	0	0	0	0	0.25	0.75	0	0	0	0
hsa-miR-23b-5p	TGGGTTCCTGGCATGCTGATTT	TGGGTTCCTGGCATGCTGATTT	8	0	0	0	2	6	0	0	0	0	0	0	0	0.25	0.75	0	0	0	0
hsa-miR-324-5p	CGCATCCCCTAGGGCATTGGTGT	CGCATCCCCTAGGGCATTGGTGT	8	0	0	0	2	6	0	0	0	0	0	0	0	0.25	0.75	0	0	0	0
hsa-miR-7706	TGAAGCGCCTGTGCTCTGCCGAGA	TGAAGCGCCTGTGCTCTGCCGAGA	35	0	0	6	3	26	0	0	0	0	0	0	0.171429	0.0857143	0.742857	0	0	0	0
hsa-miR-99a-5p	AACCCGTAGATCCGATCTTGTG	AACCCGTAGATCCGATCTTGTG	84	0	0	0	23	61	0	0	0	0	0	0	0	0.27381	0.72619	0	0	0	0
hsa-miR-455-5p	TATGTGCCTTTGGACTACATCG	TATGTGCCTTTGGACTACATCG	32	0	0	0	0	23	9	0	0	0	0	0	0	0	0.71875	0.28125	0	0	0
hsa-miR-345-5p	GCTGACTCCTAGTCCAGGGCTC	GCTGACTCCTAGTCCAGGGCTC	78	0	0	0	22	56	0	0	0	0	0	0	0	0.282051	0.717949	0	0	0	0
hsa-miR-151b	TCGAGGAGCTCACAGTCT	TCGAGGAGCTCACAGTCT	7	0	0	0	0	5	0	0	2	0	0	0	0	0	0.714286	0	0	0.285714	0
hsa-miR-203a-3p	GTGAAATGTTTAGGACCACTAG	GTGAAATGTTTAGGACCACTAG	7	0	0	0	0	5	2	0	0	0	0	0	0	0	0.714286	0.285714	0	0	0
hsa-miR-181c-3p	AACCATCGACCGTTGAGTGGAC	AACCATCGACCGTTGAGTGGAC	24	0	0	0	1	17	6	0	0	0	0	0	0	0.0416667	0.708333	0.25	0	0	0
hsa-miR-3690	ACCTGGACCCAGCGTAGACAAAG	ACCTGGACCCAGCGTAGACAAAG	10	0	0	0	0	7	3	0	0	0	0	0	0	0	0.7	0.3	0	0	0
hsa-miR-143-3p	TGAGATGAAGCACTGTAGCTC	TGAGATGAAGCACTGTAGCTC	88	0	0	0	27	61	0	0	0	0	0	0	0	0.306818	0.693182	0	0	0	0
hsa-miR-504-5p	AGACCCTGGTCTGCACTCTATC	AGACCCTGGTCTGCACTCTATC	16	0	0	0	2	11	3	0	0	0	0	0	0	0.125	0.6875	0.1875	0	0	0
hsa-miR-27b-3p	TTCACAGTGGCTAAGTTCTGC	TTCACAGTGGCTAAGTTCTGC	120	0	11	0	29	80	0	0	0	0	0	0.0916667	0	0.241667	0.666667	0	0	0	0
hsa-miR-543	AAACATTCGCGGTGCACTTCTT	AAACATTCGCGGTGCACTTCTT	12	0	0	0	0	8	4	0	0	0	0	0	0	0	0.666667	0.333333	0	0	0
hsa-miR-92a-1-5p	AGGTTGGGATCGGTTGCAATGCT	AGGTTGGGATCGGTTGCAATGCT	6	0	0	0	2	4	0	0	0	0	0	0	0	0.333333	0.666667	0	0	0	0
hsa-miR-324-3p	ACTGCCCCAGGTGCTGCTGG	ACTGCCCCAGGTGCTGCTGG	3	0	0	0	1	2	0	0	0	0	0	0	0	0.333333	0.666667	0	0	0	0
hsa-miR-514a-3p	ATTGACACTTCTGTGAGTAGA	ATTGACACTTCTGTGAGTAGA	3	0	0	0	1	2	0	0	0	0	0	0	0	0.333333	0.666667	0	0	0	0
hsa-miR-539-5p	GGAGAAATTATCCTTGGTGTGT	GGAGAAATTATCCTTGGTGTGT	3	0	0	0	0	2	1	0	0	0	0	0	0	0	0.666667	0.333333	0	0	0
hsa-miR-548p	TAGCAAAAACTGCAGTTACTTT	TAGCAAAAACTGCAGTTACTTT	3	0	0	1	0	2	0	0	0	0	0	0	0.333333	0	0.666667	0	0	0	0
hsa-miR-767-5p	TGCACCATGGTTGTCTGAGCATG	TGCACCATGGTTGTCTGAGCATG	3	0	0	0	0	2	1	0	0	0	0	0	0	0	0.666667	0.333333	0	0	0
hsa-miR-424-5p	CAGCAGCAATTCATGTTTTGAA	CAGCAGCAATTCATGTTTTGAA	50	0	0	2	15	33	0	0	0	0	0	0	0.04	0.3	0.66	0	0	0	0
hsa-miR-23a-3p	ATCACATTGCCAGGGATTTCC	ATCACATTGCCAGGGATTTCC	97	0	0	1	1	64	31	0	0	0	0	0	0.0103093	0.0103093	0.659794	0.319588	0	0	0
hsa-miR-9-5p	TCTTTGGTTATCTAGCTGTATGA	TCTTTGGTTATCTAGCTGTATGA	28	0	0	0	10	18	0	0	0	0	0	0	0	0.357143	0.642857	0	0	0	0
hsa-miR-302b-3p	TAAGTGCTTCCATGTTTTAGTAG	TAAGTGCTTCCATGTTTTAGTAG	14	0	0	5	0	9	0	0	0	0	0	0	0.357143	0	0.642857	0	0	0	0
hsa-miR-302d-3p	TAAGTGCTTCCATGTTTGAGTGT	TAAGTGCTTCCATGTTTGAGTGT	14	0	0	0	5	9	0	0	0	0	0	0	0	0.357143	0.642857	0	0	0	0
hsa-miR-16-2-3p	CCAATATTACTGTGCTGCTTTA	CCAATATTACTGTGCTGCTTTA	16	0	0	0	6	10	0	0	0	0	0	0	0	0.375	0.625	0	0	0	0
hsa-miR-503-5p	TAGCAGCGGGAACAGTTCTGCAG	TAGCAGCGGGAACAGTTCTGCAG	13	0	1	1	3	8	0	0	0	0	0	0.0769231	0.0769231	0.230769	0.615385	0	0	0	0
hsa-miR-125a-5p	TCCCTGAGACCCTTTAACCTGTGA	TCCCTGAGACCCTTTAACCTGTGA	119	1	0	34	11	73	0	0	0	0	0.00840336	0	0.285714	0.092437	0.613445	0	0	0	0
hsa-miR-365a-5p	AGGGACTTTTGGGGGCAGATGTG	AGGGACTTTTGGGGGCAGATGTG	5	0	0	0	2	3	0	0	0	0	0	0	0	0.4	0.6	0	0	0	0
hsa-miR-218-5p	TTGTGCTTGATCTAACCATGT	TTGTGCTTGATCTAACCATGT	27	0	0	0	0	16	11	0	0	0	0	0	0	0	0.592593	0.407407	0	0	0
hsa-miR-338-3p	TCCAGCATCAGTGATTTTGTTG	TCCAGCATCAGTGATTTTGTTG	22	0	0	0	9	13	0	0	0	0	0	0	0	0.409091	0.590909	0	0	0	0
hsa-miR-483-5p	AAGACGGGAGGAAAGAAGGGAG	AAGACGGGAGGAAAGAAGGGAG	7	0	0	0	3	4	0	0	0	0	0	0	0	0.428571	0.571429	0	0	0	0
hsa-miR-34a-5p	TGGCAGTGTCTTAGCTGGTTGT	TGGCAGTGTCTTAGCTGGTTGT	66	0	0	0	0	37	29	0	0	0	0	0	0	0	0.560606	0.439394	0	0	0
hsa-miR-1301-3p	TTGCAGCTGCCTGGGAGTGACTTC	TTGCAGCTGCCTGGGAGTGACTTC	18	0	0	2	0	10	6	0	0	0	0	0	0.111111	0	0.555556	0.333333	0	0	0
hsa-miR-1247-5p	ACCCGTCCCGTTCGTCCCCGGA	ACCCGTCCCGTTCGTCCCCGGA	11	0	0	0	5	6	0	0	0	0	0	0	0	0.454545	0.545455	0	0	0	0
hsa-miR-454-3p	TAGTGCAATATTGCTTATAGGGT	TAGTGCAATATTGCTTATAGGGT	80	0	0	0	0	43	16	21	0	0	0	0	0	0	0.5375	0.2	0.2625	0	0
hsa-miR-660-5p	TACCCATTGCATATCGGAGTTG	TACCCATTGCATATCGGAGTTG	66	0	0	0	0	35	31	0	0	0	0	0	0	0	0.530303	0.469697	0	0	0
hsa-miR-432-5p	TCTTGGAGTAGGTCATTGGGTGG	TCTTGGAGTAGGTCATTGGGTGG	40	0	0	12	7	21	0	0	0	0	0	0	0.3	0.175	0.525	0	0	0	0
hsa-miR-424-3p	CAAAACGTGAGGCGCTGCTAT	CAAAACGTGAGGCGCTGCTAT	36	0	0	0	2	18	16	0	0	0	0	0	0	0.0555556	0.5	0.444444	0	0	0
hsa-miR-183-5p	TATGGCACTGGTAGAATTCACT	TATGGCACTGGTAGAATTCACT	28	0	0	0	0	14	14	0	0	0	0	0	0	0	0.5	0.5	0	0	0
hsa-miR-1296-5p	TTAGGGCCCTGGCTCCATCTCC	TTAGGGCCCTGGCTCCATCTCC	10	0	0	0	0	5	5	0	0	0	0	0	0	0	0.5	0.5	0	0	0
hsa-miR-29a-5p	ACTGATTTCTTTTGGTGTTCAG	ACTGATTTCTTTTGGTGTTCAG	4	0	0	0	0	2	2	0	0	0	0	0	0	0	0.5	0.5	0	0	0
hsa-miR-508-3p	TGATTGTAGCCTTTTGGAGTAGA	TGATTGTAGCCTTTTGGAGTAGA	4	0	0	0	2	2	0	0	0	0	0	0	0	0.5	0.5	0	0	0	0
hsa-miR-509-3p	TGATTGGTACGTCTGTGGGTAG	TGATTGGTACGTCTGTGGGTAG	4	0	0	0	1	2	1	0	0	0	0	0	0	0.25	0.5	0.25	0	0	0
hsa-miR-675-5p	TGGTGCGGAGAGGGCCCACAGTG	TGGTGCGGAGAGGGCCCACAGTG	4	1	0	0	1	2	0	0	0	0	0.25	0	0	0.25	0.5	0	0	0	0
hsa-miR-196a-3p	CGGCAACAAGAAACTGCCTGAG	CGGCAACAAGAAACTGCCTGAG	2	1	0	0	0	1	0	0	0	0	0.5	0	0	0	0.5	0	0	0	0
hsa-miR-301a-5p	GCTCTGACTTTATTGCACTACT	GCTCTGACTTTATTGCACTACT	2	0	0	0	1	1	0	0	0	0	0	0	0	0.5	0.5	0	0	0	0
hsa-miR-499a-5p	TTAAGACTTGCAGTGATGTTT	TTAAGACTTGCAGTGATGTTT	2	0	0	0	0	1	1	0	0	0	0	0	0	0	0.5	0.5	0	0	0
hsa-miR-221-3p	AGCTACATTGTCTGCTGGGTTTC	AGCTACATTGTCTGCTGGGTTTC	114	0	0	7	53	54	0	0	0	0	0	0	0.0614035	0.464912	0.473684	0	0	0	0
hsa-miR-374b-5p	ATATAATACAACCTGCTAAGTG	ATATAATACAACCTGCTAAGTG	38	0	0	0	16	18	4	0	0	0	0	0	0	0.421053	0.473684	0.105263	0	0	0
hsa-miR-652-3p	AATGGCGCCACTAGGGTTGTG	AATGGCGCCACTAGGGTTGT	49	0	0	3	2	23	21	0	0	0	0	0	0.0612245	0.0408163	0.469388	0.428571	0	0	0
hsa-miR-204-5p	TTCCCTTTGTCATCCTATGCCT	TTCCCTTTGTCATCCTATGCCTG	47	0	0	0	0	22	25	0	0	0	0	0	0	0	0.468085	0.531915	0	0	0
hsa-miR-24-3p	TGGCTCAGTTCAGCAGGAACAG	TGGCTCAGTTCAGCAGGAAC	102	0	0	55	0	47	0	0	0	0	0	0	0.539216	0	0.460784	0	0	0	0
hsa-miR-1271-5p	CTTGGCACCTAGCAAGCACTCA	CTTGGCACCTAGCAAGCACTC	24	0	0	1	12	11	0	0	0	0	0	0	0.0416667	0.5	0.458333	0	0	0	0
hsa-miR-374a-5p	TTATAATACAACCTGATAAGTG	TTATAATACAACCTGATAAGT	35	0	0	0	18	16	1	0	0	0	0	0	0	0.514286	0.457143	0.0285714	0	0	0
hsa-miR-216a-3p	TCACAGTGGTCTCTGGGATTAT	TCACAGTGGTCTCTGGGATTATG	11	0	0	0	0	5	6	0	0	0	0	0	0	0	0.454545	0.545455	0	0	0
hsa-miR-32-5p	TATTGCACATTACTAAGTTGCA	TATTGCACATTACTAAGTTGCA	7	0	0	2	2	3	0	0	0	0	0	0	0.285714	0.285714	0.428571	0	0	0	0
hsa-miR-19b-3p	TGTGCAAATCCATGCAAAACTGA	TGTGCAAATCCATGCAAAACTG	86	0	0	0	50	36	0	0	0	0	0	0	0	0.581395	0.418605	0	0	0	0
hsa-miR-363-3p	AATTGCACGGTATCCATCTGTA	AATTGCACGGTATCCATCTGT	40	0	0	6	18	16	0	0	0	0	0	0	0.15	0.45	0.4	0	0	0	0
hsa-miR-582-3p	TAACTGGTTGAACAACTGAACC	TAACTGGTTGAACAACTGAACCC	15	0	0	0	0	6	9	0	0	0	0	0	0	0	0.4	0.6	0	0	0
hsa-miR-135a-5p	TATGGCTTTTTATTCCTATGTGA	TATGGCTTTTTATTCCTATGTG	18	0	0	0	11	7	0	0	0	0	0	0	0	0.611111	0.388889	0	0	0	0
hsa-miR-4454	GGATCCGAGTCACGGCACCA	GGATCCGAGTCACGGC	18	8	0	3	0	7	0	0	0	0	0.444444	0	0.166667	0	0.388889	0	0	0	0
hsa-miR-33a-5p	GTGCATTGTAGTTGCATTGCA	GTGCATTGTAGTTGCATTGC	8	0	0	0	5	3	0	0	0	0	0	0	0	0.625	0.375	0	0	0	0
hsa-miR-505-3p	CGTCAACACTTGCTGGTTTCCT	CGTCAACACTTGCTGGTTTCCTCT	8	0	0	0	0	3	1	4	0	0	0	0	0	0	0.375	0.125	0.5	0	0
hsa-miR-485-5p	AGAGGCTGGCCGTGATGAATTC	AGAGGCTGGCCGTGATGAATTCG	21	0	0	0	0	7	14	0	0	0	0	0	0	0	0.333333	0.666667	0	0	0
hsa-miR-320c	AAAAGCTGGGTTGAGAGGGT	AAAAGCTGGGTTGAGAGG	3	0	0	2	0	1	0	0	0	0	0	0	0.666667	0	0.333333	0	0	0	0
hsa-miR-186-5p	CAAAGAATTCTCCTTTTGGGCT	CAAAGAATTCTCCTTTTGGGCTT	111	0	0	0	7	36	68	0	0	0	0	0	0	0.0630631	0.324324	0.612613	0	0	0
hsa-miR-431-5p	TGTCTTGCAGGCCGTCATGCA	TGTCTTGCAGGCCGTCATGC	24	0	0	0	17	7	0	0	0	0	0	0	0	0.708333	0.291667	0	0	0	0
hsa-miR-130a-3p	CAGTGCAATGTTAAAAGGGCAT	CAGTGCAATGTTAAAAGGGCATT	76	0	0	10	15	22	29	0	0	0	0	0	0.131579	0.197368	0.289474	0.381579	0	0	0
hsa-miR-152-3p	TCAGTGCATGACAGAACTTGG	TCAGTGCATGACAGAACTTGGG	53	0	1	0	0	15	37	0	0	0	0	0.0188679	0	0	0.283019	0.698113	0	0	0
hsa-miR-181b-5p	AACATTCATTGCTGTCGGTGGGT	AACATTCATTGCTGTCGGTGGGTT	117	0	0	2	17	33	65	0	0	0	0	0	0.017094	0.145299	0.282051	0.555556	0	0	0
hsa-miR-181d-5p	AACATTCATTGTTGTCGGTGGGT	AACATTCATTGTTGTCGGTGGGTT	36	0	0	0	0	10	26	0	0	0	0	0	0	0	0.277778	0.722222	0	0	0
hsa-miR-340-3p	TCCGTCTCAGTTACTTTATAGC	TCCGTCTCAGTTACTTTATAGCC	18	0	0	0	0	5	13	0	0	0	0	0	0	0	0.277778	0.722222	0	0	0
hsa-miR-744-5p	TGCGGGGCTAGGGCTAACAGCA	TGCGGGGCTAGGGCTAACAGC	98	0	0	1	70	27	0	0	0	0	0	0	0.0102041	0.714286	0.27551	0	0	0	0
hsa-miR-155-5p	TTAATGCTAATCGTGATAGGGGT	TTAATGCTAATCGTGATAGGGGTT	63	0	0	0	0	16	47	0	0	0	0	0	0	0	0.253968	0.746032	0	0	0
hsa-miR-455-3p	GCAGTCCATGGGCATATACAC	GCAGTCCATGGGCATATACACT	16	0	0	0	0	4	12	0	0	0	0	0	0	0	0.25	0.75	0	0	0
hsa-miR-625-3p	GACTATAGAACTTTCCCCCTCA	GACTATAGAACTTTCCCCCTCAT	12	0	0	1	0	3	8	0	0	0	0	0	0.0833333	0	0.25	0.666667	0	0	0
hsa-miR-223-3p	TGTCAGTTTGTCAAATACCCCA	TGTCAGTTTGTCAAATACCCC	29	0	7	1	9	7	5	0	0	0	0	0.241379	0.0344828	0.310345	0.241379	0.172414	0	0	0
hsa-miR-27a-3p	TTCACAGTGGCTAAGTTCCGC	TTCACAGTGGCTAAGTTCCG	99	3	0	0	74	22	0	0	0	0	0.030303	0	0	0.747475	0.222222	0	0	0	0
hsa-miR-195-5p	TAGCAGCACAGAAATATTGGC	TAGCAGCACAGAAATATTGGCA	9	0	0	0	0	2	7	0	0	0	0	0	0	0	0.222222	0.777778	0	0	0
hsa-miR-335-5p	TCAAGAGCAATAACGAAAAATGT	TCAAGAGCAATAACGAAAAATG	38	0	0	3	27	8	0	0	0	0	0	0	0.0789474	0.710526	0.210526	0	0	0	0
hsa-miR-451a	AAACCGTTACCATTACTGAGTT	AAACCGTTACCATTACTGAGT	10	0	0	0	7	2	1	0	0	0	0	0	0	0.7	0.2	0.1	0	0	0
hsa-miR-1247-3p	CCCCGGGAACGTCGAGACTGGAGC	CCCCGGGAACGTCGAGACTG	5	3	0	1	0	1	0	0	0	0	0.6	0	0.2	0	0.2	0	0	0	0
hsa-miR-367-3p	AATTGCACTTTAGCAATGGTGA	AATTGCACTTTAGCAATGGTG	5	0	0	0	4	1	0	0	0	0	0	0	0	0.8	0.2	0	0	0	0
hsa-miR-625-5p	AGGGGGAAAGTTCTATAGTCC	AGGGGGAAAGTTCTATAGTCCT	5	0	0	0	0	1	4	0	0	0	0	0	0	0	0.2	0.8	0	0	0
hsa-miR-7-5p	TGGAAGACTAGTGATTTTGTTGT	TGGAAGACTAGTGATTTTGTTGTT	22	0	0	0	0	4	18	0	0	0	0	0	0	0	0.181818	0.818182	0	0	0
hsa-miR-21-5p	TAGCTTATCAGACTGATGTTGA	TAGCTTATCAGACTGATGTTGACT	120	0	0	0	1	20	48	51	0	0	0	0	0	0.00833333	0.166667	0.4	0.425	0	0
hsa-miR-490-3p	CAACCTGGAGGACTCCATGCTG	CAACCTGGAGGACTCCATGCTGT	12	0	0	0	0	2	10	0	0	0	0	0	0	0	0.166667	0.833333	0	0	0
hsa-miR-4433b-5p	ATGTCCCACCCCCACTCCTGT	ATGTCCCACCCCCACTCCTGTT	6	0	0	0	0	1	5	0	0	0	0	0	0	0	0.166667	0.833333	0	0	0
hsa-miR-483-3p	TCACTCCTCTCCTCCCGTCTT	TCACTCCTCTCCTCCCGTCTTC	6	0	0	0	0	1	5	0	0	0	0	0	0	0	0.166667	0.833333	0	0	0
hsa-miR-146b-3p	TGCCCTGTGGACTCAGTTCTGG	TGCCCTGTGGACTCAGTTCTGGT	31	0	0	0	0	5	26	0	0	0	0	0	0	0	0.16129	0.83871	0	0	0
hsa-miR-15a-5p	TAGCAGCACATAATGGTTTGTG	TAGCAGCACATAATGGTTTGT	69	0	0	3	55	11	0	0	0	0	0	0	0.0434783	0.797101	0.15942	0	0	0	0
hsa-miR-200a-3p	TAACACTGTCTGGTAACGATGT	TAACACTGTCTGGTAACGATGTT	14	0	0	0	4	2	8	0	0	0	0	0	0	0.285714	0.142857	0.571429	0	0	0
hsa-miR-1307-3p	ACTCGGCGTGGCGTCGGTCGTG	ACTCGGCGTGGCGTCGGTCGTGG	95	0	0	0	0	13	82	0	0	0	0	0	0	0	0.136842	0.863158	0	0	0
hsa-miR-17-3p	ACTGCAGTGAAGGCACTTGTAG	ACTGCAGTGAAGGCACTTGTAGC	15	0	0	0	3	2	10	0	0	0	0	0	0	0.2	0.133333	0.666667	0	0	0
hsa-miR-342-3p	TCTCACACAGAAATCGCACCCGT	TCTCACACAGAAATCGCACCCGTC	92	0	0	0	7	12	73	0	0	0	0	0	0	0.076087	0.130435	0.793478	0	0	0
hsa-miR-199a-3p	ACAGTAGTCTGCACATTGGTTA	ACAGTAGTCTGCACATTGGTT	78	0	0	0	68	10	0	0	0	0	0	0	0	0.871795	0.128205	0	0	0	0
hsa-miR-23b-3p	ATCACATTGCCAGGGATTACC	ATCACATTGCCAGGGATTACCAC	102	0	6	0	0	13	5	78	0	0	0	0.0588235	0	0	0.127451	0.0490196	0.764706	0	0
hsa-miR-339-5p	TCCCTGTCCTCCAGGAGCTCACG	TCCCTGTCCTCCAGGAGCTC	24	0	21	0	0	3	0	0	0	0	0	0.875	0	0	0.125	0	0	0	0
hsa-miR-200b-3p	TAATACTGCCTGGTAATGATGA	TAATACTGCCTGGTAATGATGAC	16	0	0	0	0	2	14	0	0	0	0	0	0	0	0.125	0.875	0	0	0
hsa-miR-342-5p	AGGGGTGCTATCTGTGATTGA	AGGGGTGCTATCTGTGATTGAGG	25	0	0	0	0	3	1	17	0	4	0	0	0	0	0.12	0.04	0.68	0	0.16
hsa-miR-302c-5p	TTTAACATGGGGGTACCTGCTG	TTTAACATGGGGGTACCTGCT	9	0	0	0	8	1	0	0	0	0	0	0	0	0.888889	0.111111	0	0	0	0
hsa-miR-151a-3p	CTAGACTGAAGCTCCTTGAGG	CTAGACTGAAGCTCCTTGAGGA	118	0	0	0	0	13	105	0	0	0	0	0	0	0	0.110169	0.889831	0	0	0
hsa-miR-101-3p	TACAGTACTGTGATAACTGAA	TACAGTACTGTGATAACTGAAG	110	0	0	0	3	12	95	0	0	0	0	0	0	0.0272727	0.109091	0.863636	0	0	0
hsa-miR-320b	AAAAGCTGGGTTGAGAGGGCAA	AAAAGCTGGGTTGAGAGGGC	28	0	0	25	0	3	0	0	0	0	0	0	0.892857	0	0.107143	0	0	0	0
hsa-miR-1275	GTGGGGGAGAGGCTGTC	GTGGGGGAGAGGCTGT	10	0	0	0	9	1	0	0	0	0	0	0	0	0.9	0.1	0	0	0	0
hsa-miR-497-5p	CAGCAGCACACTGTGGTTTGT	CAGCAGCACACTGTGGTTTGTA	10	0	0	0	0	1	9	0	0	0	0	0	0	0	0.1	0.9	0	0	0
hsa-miR-107	AGCAGCATTGTACAGGGCTATCA	AGCAGCATTGTACAGGGCTAT	108	0	0	86	12	10	0	0	0	0	0	0	0.796296	0.111111	0.0925926	0	0	0	0
hsa-miR-181c-5p	AACATTCAACCTGTCGGTGAGT	AACATTCAACCTGTCGGTGAGTT	70	0	0	0	5	6	57	2	0	0	0	0	0	0.0714286	0.0857143	0.814286	0.0285714	0	0
hsa-miR-30c-5p	TGTAAACATCCTACACTCTCAGC	TGTAAACATCCTACACTCTCAGCT	108	0	0	0	0	8	100	0	0	0	0	0	0	0	0.0740741	0.925926	0	0	0
hsa-miR-130b-5p	ACTCTTTCCCTGTTGCACTAC	ACTCTTTCCCTGTTGCACTACT	42	0	0	0	0	3	39	0	0	0	0	0	0	0	0.0714286	0.928571	0	0	0
hsa-miR-302a-3p	TAAGTGCTTCCATGTTTTGGTGA	TAAGTGCTTCCATGTTTTGGTG	14	0	0	0	13	1	0	0	0	0	0	0	0	0.928571	0.0714286	0	0	0	0
hsa-miR-221-5p	ACCTGGCATACAATGTAGATTT	ACCTGGCATACAATGTAGATTTC	62	0	0	0	0	4	38	13	7	0	0	0	0	0	0.0645161	0.612903	0.209677	0.112903	0
hsa-miR-874-3p	CTGCCCTGGCCCGAGGGACCGA	CTGCCCTGGCCCGAGGGACCGAC	17	0	0	0	0	1	16	0	0	0	0	0	0	0	0.0588235	0.941176	0	0	0
hsa-miR-4286	ACCCCACTCCTGGTACC	ACCCCACTCCTGGTACCA	18	0	0	0	0	1	17	0	0	0	0	0	0	0	0.0555556	0.944444	0	0	0
hsa-miR-361-3p	TCCCCCAGGTGTGATTCTGATTT	TCCCCCAGGTGTGATTCTGATT	60	0	0	0	33	3	22	2	0	0	0	0	0	0.55	0.05	0.366667	0.0333333	0	0
hsa-miR-452-5p	AACTGTTTGCAGAGGAAACTGA	AACTGTTTGCAGAGGAAACTGAGA	20	0	0	0	0	1	1	18	0	0	0	0	0	0	0.05	0.05	0.9	0	0
hsa-miR-26b-5p	TTCAAGTAATTCAGGATAGGT	TTCAAGTAATTCAGGATAGGTT	123	0	0	0	0	6	117	0	0	0	0	0	0	0	0.0487805	0.95122	0	0	0
hsa-miR-141-3p	TAACACTGTCTGGTAAAGATGG	TAACACTGTCTGGTAAAGATG	21	0	0	0	18	1	2	0	0	0	0	0	0	0.857143	0.047619	0.0952381	0	0	0
hsa-miR-502-3p	AATGCACCTGGGCAAGGATTCA	AATGCACCTGGGCAAGGATTC	21	0	0	1	19	1	0	0	0	0	0	0	0.047619	0.904762	0.047619	0	0	0	0
hsa-miR-425-5p	AATGACACGATCACTCCCGTTGA	AATGACACGATCACTCCCGTTGAGT	94	0	0	0	27	4	0	63	0	0	0	0	0	0.287234	0.0425532	0	0.670213	0	0
hsa-miR-106b-3p	CCGCACTGTGGGTACTTGCTGC	CCGCACTGTGGGTACTTGCT	65	0	1	52	10	2	0	0	0	0	0	0.0153846	0.8	0.153846	0.0307692	0	0	0	0
hsa-let-7a-3p	CTATACAATCTACTGTCTTTC	CTATACAATCTACTGTCTTTCC	34	0	0	0	0	1	33	0	0	0	0	0	0	0	0.0294118	0.970588	0	0	0
hsa-miR-450b-5p	TTTTGCAATATGTTCCTGAATA	TTTTGCAATATGTTCCTGAAT	42	0	0	0	41	1	0	0	0	0	0	0	0	0.97619	0.0238095	0	0	0	0
hsa-miR-30d-5p	TGTAAACATCCCCGACTGGAAG	TGTAAACATCCCCGACTGGAAGC	123	0	0	7	0	2	5	109	0	0	0	0	0.0569106	0	0.0162602	0.0406504	0.886179	0	0
hsa-miR-148b-5p	AAGTTCTGTTATACACTCAGGC	AAGTTCTGTTATACACTCAGGCT	37	0	0	0	0	0	37	0	0	0	0	0	0	0	0	1	0	0	0
hsa-miR-494-3p	TGAAACATACACGGGAAACCTC	TGAAACATACACGGGAAACCTCT	21	0	0	0	0	0	21	0	0	0	0	0	0	0	0	1	0	0	0
hsa-miR-31-3p	TGCTATGCCAACATATTGCCAT	TGCTATGCCAACATATTGCCATC	19	0	0	0	0	0	19	0	0	0	0	0	0	0	0	1	0	0	0
hsa-miR-127-5p	CTGAAGCTCAGAGGGCTCTGAT	CTGAAGCTCAGAGGGCTCTGATT	14	0	0	0	0	0	14	0	0	0	0	0	0	0	0	1	0	0	0
hsa-miR-330-5p	TCTCTGGGCCTGTGTCTTAGGC	TCTCTGGGCCTGTGTCTTAGGCT	8	0	0	0	0	0	8	0	0	0	0	0	0	0	0	1	0	0	0
hsa-miR-1468-5p	CTCCGTTTGCCTGTTTCGCTG	CTCCGTTTGCCTGTTTCGCTGA	5	0	0	0	0	0	5	0	0	0	0	0	0	0	0	1	0	0	0
hsa-miR-3117-3p	ATAGGACTCATATAGTGCCAG	ATAGGACTCATATAGTGCCAGG	5	0	0	0	0	0	5	0	0	0	0	0	0	0	0	1	0	0	0
hsa-miR-371a-5p	ACTCAAACTGTGGGGGCACT	ACTCAAACTGTGGGGGCACTT	5	0	0	0	0	0	5	0	0	0	0	0	0	0	0	1	0	0	0
hsa-miR-365b-5p	AGGGACTTTCAGGGGCAGCTGT	AGGGACTTTCAGGGGCAGCTGTG	4	0	0	0	0	0	4	0	0	0	0	0	0	0	0	1	0	0	0
hsa-miR-3200-3p	CACCTTGCGCTACTCAGGTCTG	CACCTTGCGCTACTCAGGTCTGC	3	0	0	0	0	0	3	0	0	0	0	0	0	0	0	1	0	0	0
hsa-miR-671-5p	AGGAAGCCCTGGAGGGGCTGGAG	AGGAAGCCCTGGAGGGGCTGGAGG	3	0	0	0	0	0	3	0	0	0	0	0	0	0	0	1	0	0	0
hsa-miR-190b	TGATATGTTTGATATTGGGTT	TGATATGTTTGATATTGGGTTG	2	0	0	0	0	0	2	0	0	0	0	0	0	0	0	1	0	0	0
hsa-miR-215-5p	ATGACCTATGAATTGACAGAC	ATGACCTATGAATTGACAGACA	2	0	0	0	0	0	2	0	0	0	0	0	0	0	0	1	0	0	0
hsa-miR-219a-5p	TGATTGTCCAAACGCAATTCT	TGATTGTCCAAACGCAATTCTC	2	0	0	0	0	0	2	0	0	0	0	0	0	0	0	1	0	0	0
hsa-miR-93-3p	ACTGCTGAGCTAGCACTTCCCG	ACTGCTGAGCTAGCACTTCCCGA	2	0	0	0	0	0	2	0	0	0	0	0	0	0	0	1	0	0	0
hsa-miR-99a-3p	CAAGCTCGCTTCTATGGGTCTG	CAAGCTCGCTTCTATGGGTCTGT	2	0	0	0	0	0	2	0	0	0	0	0	0	0	0	1	0	0	0
hsa-miR-1228-3p	TCACACCTGCCTCGCCCCCC	TCACACCTGCCTCGCCCCCCA	1	0	0	0	0	0	1	0	0	0	0	0	0	0	0	1	0	0	0
hsa-miR-1287-5p	TGCTGGATCAGTGGTTCGAGTC	TGCTGGATCAGTGGTTCGAGTCT	1	0	0	0	0	0	1	0	0	0	0	0	0	0	0	1	0	0	0
hsa-miR-188-5p	CATCCCTTGCATGGTGGAGGG	CATCCCTTGCATGGTGGAGGGT	1	0	0	0	0	0	1	0	0	0	0	0	0	0	0	1	0	0	0
hsa-miR-2110	TTGGGGAAACGGCCGCTGAGTG	TTGGGGAAACGGCCGCTGAGTGA	1	0	0	0	0	0	1	0	0	0	0	0	0	0	0	1	0	0	0
hsa-miR-2116-3p	CCTCCCATGCCAAGAACTCCC	CCTCCCATGCCAAGAACTCCCA	1	0	0	0	0	0	1	0	0	0	0	0	0	0	0	1	0	0	0
hsa-miR-29b-2-5p	CTGGTTTCACATGGTGGCTTAG	CTGGTTTCACATGGTGGCTTAGA	1	0	0	0	0	0	1	0	0	0	0	0	0	0	0	1	0	0	0
hsa-miR-302b-5p	ACTTTAACATGGAAGTGCTTTC	ACTTTAACATGGAAGTGCTTTCT	1	0	0	0	0	0	1	0	0	0	0	0	0	0	0	1	0	0	0
hsa-miR-326	CCTCTGGGCCCTTCCTCCAG	CCTCTGGGCCCTTCCTCCAGC	1	0	0	0	0	0	1	0	0	0	0	0	0	0	0	1	0	0	0
hsa-miR-519d-3p	CAAAGTGCCTCCCTTTAGAGTG	CAAAGTGCCTCCCTTTAGAGTGT	1	0	0	0	0	0	1	0	0	0	0	0	0	0	0	1	0	0	0
hsa-miR-520d-5p	CTACAAAGGGAAGCCCTTTC	CTACAAAGGGAAGCCCTTTCT	1	0	0	0	0	0	1	0	0	0	0	0	0	0	0	1	0	0	0
hsa-miR-520e	AAAGTGCTTCCTTTTTGAGGG	AAAGTGCTTCCTTTTTGAGGGT	1	0	0	0	0	0	1	0	0	0	0	0	0	0	0	1	0	0	0
hsa-miR-527	CTGCAAAGGGAAGCCCTTTC	CTGCAAAGGGAAGCCCTTTCT	1	0	0	0	0	0	1	0	0	0	0	0	0	0	0	1	0	0	0
hsa-miR-576-5p	ATTCTAATTTCTCCACGTCTTT	ATTCTAATTTCTCCACGTCTTTG	1	0	0	0	0	0	1	0	0	0	0	0	0	0	0	1	0	0	0
hsa-miR-653-5p	GTGTTGAAACAATCTCTACTG	GTGTTGAAACAATCTCTACTGA	1	0	0	0	0	0	1	0	0	0	0	0	0	0	0	1	0	0	0
hsa-miR-766-5p	AGGAGGAATTGGTGCTGGTCTT	AGGAGGAATTGGTGCTGGTCTTT	1	0	0	0	0	0	1	0	0	0	0	0	0	0	0	1	0	0	0
hsa-miR-892a	CACTGTGTCCTTTCTGCGTAG	CACTGTGTCCTTTCTGCGTAGA	1	0	0	0	0	0	1	0	0	0	0	0	0	0	0	1	0	0	0
hsa-miR-500a-3p	ATGCACCTGGGCAAGGATTCTG	ATGCACCTGGGCAAGGATTCTGA	84	0	1	0	0	0	83	0	0	0	0	0.0119048	0	0	0	0.988095	0	0	0
hsa-miR-24-2-5p	TGCCTACTGAGCTGAAACACAG	TGCCTACTGAGCTGAAACACAGT	49	0	0	1	1	0	47	0	0	0	0	0	0.0204082	0.0204082	0	0.959184	0	0	0
hsa-miR-31-5p	AGGCAAGATGCTGGCATAGCT	AGGCAAGATGCTGGCATAGCTG	66	0	0	0	0	0	60	6	0	0	0	0	0	0	0	0.909091	0.0909091	0	0
hsa-miR-382-3p	AATCATTCACGGACAACACTT	AATCATTCACGGACAACACTTT	8	0	0	0	2	0	6	0	0	0	0	0	0	0.25	0	0.75	0	0	0
hsa-miR-1179	AAGCATTCTTTCATTGGTTGG	AAGCATTCTTTCATTGGTTGGT	4	0	0	0	1	0	3	0	0	0	0	0	0	0.25	0	0.75	0	0	0
hsa-miR-760	CGGCTCTGGGTCTGTGGGGA	CGGCTCTGGGTCTGTGGGGAG	4	0	0	0	0	0	3	1	0	0	0	0	0	0	0	0.75	0.25	0	0
hsa-miR-133a-3p	TTTGGTCCCCTTCAACCAGCTG	TTTGGTCCCCTTCAACCAGCTGT	11	0	0	0	3	0	8	0	0	0	0	0	0	0.272727	0	0.727273	0	0	0
hsa-miR-708-3p	CAACTAGACTGTGAGCTTCTAG	CAACTAGACTGTGAGCTTCTAGA	29	0	0	1	8	0	20	0	0	0	0	0	0.0344828	0.275862	0	0.689655	0	0	0
hsa-miR-509-5p	TACTGCAGACAGTGGCAATCA	TACTGCAGACAGTGGCAATCAT	3	0	0	0	0	0	2	1	0	0	0	0	0	0	0	0.666667	0.333333	0	0
hsa-miR-629-5p	TGGGTTTACGTTGGGAGAACT	TGGGTTTACGTTGGGAGAACTT	16	6	0	0	0	0	10	0	0	0	0.375	0	0	0	0	0.625	0	0	0
hsa-miR-365a-3p	TAATGCCCCTAAAAATCCTTAT	TAATGCCCCTAAAAATCCTTATT	5	0	0	0	2	0	3	0	0	0	0	0	0	0.4	0	0.6	0	0	0
hsa-miR-147b	GTGTGCGGAAATGCTTCTGCTA	GTGTGCGGAAATGCTTCTGCTAC	4	0	0	0	2	0	2	0	0	0	0	0	0	0.5	0	0.5	0	0	0
hsa-miR-2467-5p	TGAGGCTCTGTTAGCCTTGGCTC	TGAGGCTCTGTTAGCCTTGGCTCT	2	0	0	0	1	0	1	0	0	0	0	0	0	0.5	0	0.5	0	0	0
hsa-miR-143-5p	GGTGCAGTGCTGCATCTCTGGT	GGTGCAGTGCTGCATCTCTGG	6	0	1	0	3	0	2	0	0	0	0	0.166667	0	0.5	0	0.333333	0	0	0
hsa-miR-3615	TCTCTCGGCTCCTCGCGGCTC	TCTCTCGGCTCCTCGCGGCTCGC	29	0	0	0	1	0	9	19	0	0	0	0	0	0.0344828	0	0.310345	0.655172	0	0
hsa-miR-224-5p	CAAGTCACTAGTGGTTCCGTT	CAAGTCACTAGTGGTTCCGTTTAG	36	0	0	0	0	0	8	0	28	0	0	0	0	0	0	0.222222	0	0.777778	0
hsa-miR-25-5p	AGGCGGAGACTTGGGCAATTG	AGGCGGAGACTTGGGCAATTGCT	10	0	0	0	0	0	2	8	0	0	0	0	0	0	0	0.2	0.8	0	0
hsa-miR-1224-5p	GTGAGGACTCGGGAGGTGG	GTGAGGACTCGGGAGGTGGAG	5	0	0	0	0	0	1	4	0	0	0	0	0	0	0	0.2	0.8	0	0
hsa-miR-140-3p	TACCACAGGGTAGAACCACGG	TACCACAGGGTAGAACCACGGAC	113	0	0	0	0	0	13	91	9	0	0	0	0	0	0	0.115044	0.80531	0.079646	0
hsa-miR-146b-5p	TGAGAACTGAATTCCATAGGCT	TGAGAACTGAATTCCATAGGCTGT	95	0	0	0	0	0	8	87	0	0	0	0	0	0	0	0.0842105	0.915789	0	0
hsa-miR-589-5p	TGAGAACCACGTCTGCTCTGAG	TGAGAACCACGTCTGCTCTGA	40	0	0	0	37	0	3	0	0	0	0	0	0	0.925	0	0.075	0	0	0
hsa-miR-92b-5p	AGGGACGGGACGCGGTGCAGTG	AGGGACGGGACGCGGTGCAGTGTT	16	0	0	0	0	0	1	15	0	0	0	0	0	0	0	0.0625	0.9375	0	0
hsa-miR-30a-5p	TGTAAACATCCTCGACTGGAAG	TGTAAACATCCTCGACTGGAAGCT	88	0	0	3	0	0	5	80	0	0	0	0	0.0340909	0	0	0.0568182	0.909091	0	0
hsa-miR-30e-5p	TGTAAACATCCTTGACTGGAAG	TGTAAACATCCTTGACTGGAAGCT	109	0	0	0	0	0	2	107	0	0	0	0	0	0	0	0.0183486	0.981651	0	0
hsa-miR-10b-5p	TACCCTGTAGAACCGAATTTGTG	TACCCTGTAGAACCGAATTTGT	63	0	0	0	63	0	0	0	0	0	0	0	0	1	0	0	0	0	0
hsa-miR-1260b	ATCCCACCACTGCCACCAT	ATCCCACCACTGCCACCA	42	0	0	0	42	0	0	0	0	0	0	0	0	1	0	0	0	0	0
hsa-miR-369-5p	AGATCGACCGTGTTATATTCGC	AGATCGACCGTGTTATATTCG	22	0	0	0	22	0	0	0	0	0	0	0	0	1	0	0	0	0	0
hsa-miR-615-3p	TCCGAGCCTGGGTCTCCCTCTT	TCCGAGCCTGGGTCTCCCTCT	19	0	0	0	19	0	0	0	0	0	0	0	0	1	0	0	0	0	0
hsa-miR-323b-3p	CCCAATACACGGTCGACCTCTT	CCCAATACACGGTCGACCTCT	14	0	0	0	14	0	0	0	0	0	0	0	0	1	0	0	0	0	0
hsa-miR-95-3p	TTCAACGGGTATTTATTGAGCA	TTCAACGGGTATTTATTGAGC	14	0	0	0	14	0	0	0	0	0	0	0	0	1	0	0	0	0	0
hsa-miR-222-5p	CTCAGTAGCCAGTGTAGATCCT	CTCAGTAGCCAGTGTAGATCC	12	0	0	0	12	0	0	0	0	0	0	0	0	1	0	0	0	0	0
hsa-miR-135a-3p	TATAGGGATTGGAGCCGTGGCG	TATAGGGATTGGAGCCGTGGC	11	0	0	0	11	0	0	0	0	0	0	0	0	1	0	0	0	0	0
hsa-miR-411-3p	TATGTAACACGGTCCACTAACC	TATGTAACACGGTCCACTAAC	11	0	0	0	11	0	0	0	0	0	0	0	0	1	0	0	0	0	0
hsa-miR-376a-5p	GTAGATTCTCCTTCTATGAGTA	GTAGATTCTCCTTCTATGAGT	10	0	0	0	10	0	0	0	0	0	0	0	0	1	0	0	0	0	0
hsa-miR-10a-3p	CAAATTCGTATCTAGGGGAATA	CAAATTCGTATCTAGGGGAAT	6	0	0	0	6	0	0	0	0	0	0	0	0	1	0	0	0	0	0
hsa-miR-944	AAATTATTGTACATCGGATGAG	AAATTATTGTACATCGGATGA	5	0	0	0	5	0	0	0	0	0	0	0	0	1	0	0	0	0	0
hsa-miR-338-5p	AACAATATCCTGGTGCTGAGTG	AACAATATCCTGGTGCTGAGT	4	0	0	0	4	0	0	0	0	0	0	0	0	1	0	0	0	0	0
hsa-miR-15b-3p	CGAATCATTATTTGCTGCTCTA	CGAATCATTATTTGCTGCTCT	3	0	0	0	3	0	0	0	0	0	0	0	0	1	0	0	0	0	0
hsa-miR-2277-5p	AGCGCGGGCTGAGCGCTGCCAGTC	AGCGCGGGCTGAGCGCTGCCAGT	2	0	0	0	2	0	0	0	0	0	0	0	0	1	0	0	0	0	0
hsa-miR-29c-5p	TGACCGATTTCTCCTGGTGTTC	TGACCGATTTCTCCTGGTGTT	2	0	0	0	2	0	0	0	0	0	0	0	0	1	0	0	0	0	0
hsa-miR-448	TTGCATATGTAGGATGTCCCAT	TTGCATATGTAGGATGTCCCA	2	0	0	0	2	0	0	0	0	0	0	0	0	1	0	0	0	0	0
hsa-miR-513c-5p	TTCTCAAGGAGGTGTCGTTTAT	TTCTCAAGGAGGTGTCGTTTA	2	0	0	0	2	0	0	0	0	0	0	0	0	1	0	0	0	0	0
hsa-miR-101-5p	CAGTTATCACAGTGCTGATGCT	CAGTTATCACAGTGCTGATGC	1	0	0	0	1	0	0	0	0	0	0	0	0	1	0	0	0	0	0
hsa-miR-149-3p	AGGGAGGGACGGGGGCTGTGC	AGGGAGGGACGGGGGCTGTG	1	0	0	0	1	0	0	0	0	0	0	0	0	1	0	0	0	0	0
hsa-miR-187-3p	TCGTGTCTTGTGTTGCAGCCGG	TCGTGTCTTGTGTTGCAGCCG	1	0	0	0	1	0	0	0	0	0	0	0	0	1	0	0	0	0	0
hsa-miR-216b-3p	ACACACTTACCCGTAGAGATTCTA	ACACACTTACCCGTAGAGATTCT	1	0	0	0	1	0	0	0	0	0	0	0	0	1	0	0	0	0	0
hsa-miR-376b-3p	ATCATAGAGGAAAATCCATGTT	ATCATAGAGGAAAATCCATGT	1	0	0	0	1	0	0	0	0	0	0	0	0	1	0	0	0	0	0
hsa-miR-380-5p	TGGTTGACCATAGAACATGCGC	TGGTTGACCATAGAACATGCG	1	0	0	0	1	0	0	0	0	0	0	0	0	1	0	0	0	0	0
hsa-miR-508-5p	TACTCCAGAGGGCGTCACTCATG	TACTCCAGAGGGCGTCACTCAT	1	0	0	0	1	0	0	0	0	0	0	0	0	1	0	0	0	0	0
hsa-miR-548e-3p	AAAAACTGAGACTACTTTTGCA	AAAAACTGAGACTACTTTTGC	1	0	0	0	1	0	0	0	0	0	0	0	0	1	0	0	0	0	0
hsa-miR-641	AAAGACATAGGATAGAGTCACCTC	AAAGACATAGGATAGAGTCACCT	1	0	0	0	1	0	0	0	0	0	0	0	0	1	0	0	0	0	0
hsa-miR-664a-5p	ACTGGCTAGGGAAAATGATTGGAT	ACTGGCTAGGGAAAATGATTGGA	1	0	0	0	1	0	0	0	0	0	0	0	0	1	0	0	0	0	0
hsa-miR-874-5p	CGGCCCCACGCACCAGGGTAAGA	CGGCCCCACGCACCAGGGTAAG	1	0	0	0	1	0	0	0	0	0	0	0	0	1	0	0	0	0	0
hsa-miR-10a-5p	TACCCTGTAGATCCGAATTTGTG	TACCCTGTAGATCCGAATTTGT	112	0	0	1	111	0	0	0	0	0	0	0	0.00892857	0.991071	0	0	0	0	0
hsa-miR-584-5p	TTATGGTTTGCCTGGGACTGAG	TTATGGTTTGCCTGGGACTGA	27	1	0	1	25	0	0	0	0	0	0.037037	0	0.037037	0.925926	0	0	0	0	0
hsa-miR-339-3p	TGAGCGCCTCGACGACAGAGCCG	TGAGCGCCTCGACGACAGAGCC	55	0	0	5	50	0	0	0	0	0	0	0	0.0909091	0.909091	0	0	0	0	0
hsa-miR-302d-5p	ACTTTAACATGGAGGCACTTGC	ACTTTAACATGGAGGCACTTG	7	0	0	1	6	0	0	0	0	0	0	0	0.142857	0.857143	0	0	0	0	0
hsa-miR-185-3p	AGGGGCTGGCTTTCCTCTGGTC	AGGGGCTGGCTTTCCTCTGGT	4	2	0	0	2	0	0	0	0	0	0.5	0	0	0.5	0	0	0	0	0
hsa-miR-520f-3p	AAGTGCTTCCTTTTAGAGGGTT	AAGTGCTTCCTTTTAGAG	5	3	0	0	2	0	0	0	0	0	0.6	0	0	0.4	0	0	0	0	0
hsa-miR-449c-5p	TAGGCAGTGTATTGCTAGCGGCTGT	TAGGCAGTGTATTGCTAGCGGCT	4	0	0	3	1	0	0	0	0	0	0	0	0.75	0.25	0	0	0	0	0
hsa-miR-150-3p	CTGGTACAGGCCTGGGGGACAG	CTGGTACAGGCCTGGGGGAC	5	0	0	4	1	0	0	0	0	0	0	0	0.8	0.2	0	0	0	0	0
hsa-miR-654-3p	TATGTCTGCTGACCATCACCTT	TATGTCTGCTGACCATCACC	50	0	0	42	8	0	0	0	0	0	0	0	0.84	0.16	0	0	0	0	0
hsa-miR-136-5p	ACTCCATTTGTTTTGATGATGGA	ACTCCATTTGTTTTGATGATG	15	0	0	13	2	0	0	0	0	0	0	0	0.866667	0.133333	0	0	0	0	0
hsa-miR-190a-5p	TGATATGTTTGATATATTAGGT	TGATATGTTTGATATATTAGGTTG	20	0	0	0	0	0	0	20	0	0	0	0	0	0	0	0	1	0	0
hsa-miR-887-3p	GTGAACGGGCGCCATCCCGAGG	GTGAACGGGCGCCATCCCGAGGCT	14	0	0	0	0	0	0	14	0	0	0	0	0	0	0	0	1	0	0
hsa-miR-511-3p	AATGTGTAGCAAAAGACAGA	AATGTGTAGCAAAAGACAGAAT	12	0	0	0	0	0	0	12	0	0	0	0	0	0	0	0	1	0	0
hsa-miR-516b-5p	ATCTGGAGGTAAGAAGCACTTT	ATCTGGAGGTAAGAAGCACTTTCT	5	0	0	0	0	0	0	5	0	0	0	0	0	0	0	0	1	0	0
hsa-miR-370-5p	CAGGTCACGTCTCTGCAGTTAC	CAGGTCACGTCTCTGCAGTTACAC	2	0	0	0	0	0	0	2	0	0	0	0	0	0	0	0	1	0	0
hsa-miR-488-5p	CCCAGATAATGGCACTCTCAA	CCCAGATAATGGCACTCTCAAAC	2	0	0	0	0	0	0	2	0	0	0	0	0	0	0	0	1	0	0
hsa-miR-628-3p	TCTAGTAAGAGTGGCAGTCGA	TCTAGTAAGAGTGGCAGTCGAAG	2	0	0	0	0	0	0	2	0	0	0	0	0	0	0	0	1	0	0
hsa-miR-1976	CCTCCTGCCCTCCTTGCTGT	CCTCCTGCCCTCCTTGCTGTAG	1	0	0	0	0	0	0	1	0	0	0	0	0	0	0	0	1	0	0
hsa-miR-501-5p	AATCCTTTGTCCCTGGGTGAGA	AATCCTTTGTCCCTGGGTGAGAGT	1	0	0	0	0	0	0	1	0	0	0	0	0	0	0	0	1	0	0
hsa-miR-675-3p	CTGTATGCCCTCACCGCTCA	CTGTATGCCCTCACCGCTCAGC	1	0	0	0	0	0	0	1	0	0	0	0	0	0	0	0	1	0	0
hsa-miR-877-5p	GTAGAGGAGATGGCGCAGGG	GTAGAGGAGATGGCGCAGGGGA	23	0	0	0	0	0	0	14	4	5	0	0	0	0	0	0	0.608696	0.173913	0.217391
hsa-miR-222-3p	AGCTACATCTGGCTACTGGGT	AGCTACATCTGGCTACTGGGTCTC	112	0	0	0	0	0	0	17	86	9	0	0	0	0	0	0	0.151786	0.767857	0.0803571
hsa-miR-378d	ACTGGACTTGGAGTCAGAAA	ACTGGACTTGGAGTCAGA	10	0	0	10	0	0	0	0	0	0	0	0	1	0	0	0	0	0	0
hsa-miR-302c-3p	TAAGTGCTTCCATGTTTCAGTGG	TAAGTGCTTCCATGTTTCAGT	8	0	0	8	0	0	0	0	0	0	0	0	1	0	0	0	0	0	0
hsa-miR-1269b	CTGGACTGAGCCATGCTACTGG	CTGGACTGAGCCATGCTACT	7	0	0	7	0	0	0	0	0	0	0	0	1	0	0	0	0	0	0
hsa-miR-509-3-5p	TACTGCAGACGTGGCAATCATG	TACTGCAGACGTGGCAATCA	3	0	0	3	0	0	0	0	0	0	0	0	1	0	0	0	0	0	0
hsa-miR-128-1-5p	CGGGGCCGTAGCACTGTCTGAGA	CGGGGCCGTAGCACTGTCTGA	2	0	0	2	0	0	0	0	0	0	0	0	1	0	0	0	0	0	0
hsa-miR-202-5p	TTCCTATGCATATACTTCTTTG	TTCCTATGCATATACTTCTT	2	0	0	2	0	0	0	0	0	0	0	0	1	0	0	0	0	0	0
hsa-miR-512-5p	CACTCAGCCTTGAGGGCACTTTC	CACTCAGCCTTGAGGGCACTT	1	0	0	1	0	0	0	0	0	0	0	0	1	0	0	0	0	0	0
hsa-miR-514a-5p	TACTCTGGAGAGTGACAATCATG	TACTCTGGAGAGTGACAATCA	1	0	0	1	0	0	0	0	0	0	0	0	1	0	0	0	0	0	0
hsa-miR-518c-3p	CAAAGCGCTTCTCTTTAGAGTGT	CAAAGCGCTTCTCTTTAGAGT	1	0	0	1	0	0	0	0	0	0	0	0	1	0	0	0	0	0	0
hsa-miR-665	ACCAGGAGGCTGAGGCCCCT	ACCAGGAGGCTGAGGCCC	1	0	0	1	0	0	0	0	0	0	0	0	1	0	0	0	0	0	0
hsa-miR-668-3p	TGTCACTCGGCTCGGCCCACTAC	TGTCACTCGGCTCGGCCCACT	1	0	0	1	0	0	0	0	0	0	0	0	1	0	0	0	0	0	0
hsa-miR-1268b	CGGGCGTGGTGGTGGGGGTG	CGGGCGTGGTGGTGGGGG	4	0	2	2	0	0	0	0	0	0	0	0.5	0.5	0	0	0	0	0	0
hsa-miR-670-3p	TTTCCTCATATTCATTCAGGA	TTTCCTCATATTCATTCAGGAGTG	7	0	0	0	0	0	0	0	7	0	0	0	0	0	0	0	0	1	0
hsa-miR-4521	GCTAAGGAAGTCCTGTGCTCAG	GCTAAGGAAGTCCTGTGCTCAGTTT	3	0	0	0	0	0	0	0	3	0	0	0	0	0	0	0	0	1	0
hsa-miR-449b-5p	AGGCAGTGTATTGTTAGCTGGC	AGGCAGTGTATTGTTAGCTGGCTGC	2	0	0	0	0	0	0	0	2	0	0	0	0	0	0	0	0	1	0
hsa-miR-585-3p	TGGGCGTATCTGTATGCTA	TGGGCGTATCTGTATGCTAGGG	2	0	0	0	0	0	0	0	2	0	0	0	0	0	0	0	0	1	0
hsa-miR-199b-3p	ACAGTAGTCTGCACATTGGTTA	ACAGTAGTCTGCACATTGG	48	0	48	0	0	0	0	0	0	0	0	1	0	0	0	0	0	0	0
hsa-miR-18b-5p	TAAGGTGCATCTAGTGCAGTTAG	TAAGGTGCATCTAGTGCAGT	4	0	4	0	0	0	0	0	0	0	0	1	0	0	0	0	0	0	0
hsa-miR-548f-3p	AAAAACTGTAATTACTTTT	AAAAACTGTAATTACTTTTGGAC	4	0	0	0	0	0	0	0	0	4	0	0	0	0	0	0	0	0	1
hsa-miR-4326	TGTTCCTCTGTCTCCCAGAC	TGTTCCTCTGTCTCCCAGACTCTG	2	0	0	0	0	0	0	0	0	2	0	0	0	0	0	0	0	0	1
hsa-miR-513a-5p	TTCACAGGGAGGTGTCAT	TTCACAGGGAGGTGTCATTTAT	1	0	0	0	0	0	0	0	0	1	0	0	0	0	0	0	0	0	1
hsa-miR-1277-5p	AAATATATATATATATGTACGTAT	AAATATATATATATATGTAC	3	3	0	0	0	0	0	0	0	0	1	0	0	0	0	0	0	0	0
hsa-miR-378c	ACTGGACTTGGAGTCAGAAGAGTGG	ACTGGACTTGGAGTCAGAAGA	2	2	0	0	0	0	0	0	0	0	1	0	0	0	0	0	0	0	0
hsa-miR-652-5p	CAACCCTAGGAGAGGGTGCCATTCA	CAACCCTAGGAGAGGGTGCCA	1	1	0	0	0	0	0	0	0	0	1	0	0	0	0	0	0	0	0
