# Supplementary material for: Toward the human cellular microRNAome
Source: HighWire-hosted journal article supplement (doi:10.1101/gr.222067.117), 2017-09-06
Supplement: Supplemental_Table_S12.xlsx [file Supplemental_Table_S12.xlsx]

## Sheet: Sheet1
miRNA	Ʃ of the most abundant isomiR species not the canonical 5p spot	Samples meeting criteria	Base shift from 5p canonical	miRBase v21 Canonical	Most abundant 5' different
hsa-miR-125b-2-3p	62	62	+2	TCACAAGTCAGGCTCTTGGGAC	ACAAGTCAGGCTCTTGGGACCT
hsa-miR-199b-3p	51	51	+1	ACAGTAGTCTGCACATTGGTTA	CAGTAGTCTGCACATTGGTTA
hsa-miR-146b-3p	31	31	+2	TGCCCTGTGGACTCAGTTCTGG	GCCCTGTGGACTCAGTTCTGGT
hsa-miR-425-3p	27	27	-1	ATCGGGAATGTCGTGTCCGCCC	CATCGGGAATGTCGTGTCCGCC
hsa-miR-181c-3p	24	24	+1	AACCATCGACCGTTGAGTGGAC	ACCATCGACCGTTGAGTGGACC
hsa-miR-302a-5p	18	18	+3	ACTTAAACGTGGATGTACTTGCT	TAAACGTGGATGTACTTGCTTT
hsa-miR-4454	18	18	+2	GGATCCGAGTCACGGCACCA	ATCCGAGTCACGGCACCA
hsa-miR-511-5p	18	18	-1	GTGTCTTTTGCTCTGCAGTCA	CGTGTCTTTTGCTCTGCAGTCA
hsa-miR-145-3p	14	14	+2	GGATTCCTGGAAATACTGTTCT	ATTCCTGGAAATACTGTTCTT
hsa-miR-337-3p	12	12	+1	CTCCTATATGATGCCTTTCTTC	TCCTATATGATGCCTTTCTTC
hsa-miR-135a-3p	11	11	-1	TATAGGGATTGGAGCCGTGGCG	ATATAGGGATTGGAGCCGTGGC
hsa-miR-216a-3p	11	11	+1	TCACAGTGGTCTCTGGGATTAT	CACAGTGGTCTCTGGGATTATG
hsa-miR-758-5p	10	10	+1	GATGGTTGACCAGAGAGCACAC	ATGGTTGACCAGAGAGCACACG
hsa-miR-191-3p	9	9	+1	GCTGCGCTTGGATTTCGTCCCC	CTGCGCTTGGATTTCGTCCCC
hsa-miR-3607-3p	7	7	+1	ACTGTAAACGCTTTCTGATG	CTGTAAACGCTTTCTGATG
hsa-miR-577	7	7	-1	TAGATAAAATATTGGTACCTG	GTAGATAAAATATTGGTACCTG
hsa-miR-296-3p	6	6	+1	GAGGGTTGGGTGGAGGCTCTCC	AGGGTTGGGTGGAGGTTCTCC
hsa-miR-4433b-3p	6	6	-1	CAGGAGTGGGGGGTGGGACGT	ACAGGAGTGGGGGGTGGGACGT
hsa-miR-483-3p	6	6	+1	TCACTCCTCTCCTCCCGTCTT	CACTCCTCTCCTCCCGTCTTCT
hsa-miR-1247-3p	5	5	+3	CCCCGGGAACGTCGAGACTGGAGC	CGGGAACGTCGAGACTGGAGC
hsa-miR-431-3p	5	5	-2	CAGGTCGTCTTGCAGGGCTTCT	TGCAGGTCGTCTTGCAGGGCTTC
hsa-miR-520f-3p	5	5	-1	AAGTGCTTCCTTTTAGAGGGTT	CAAGTGCTTCCTTTTAGAGGGT
hsa-miR-873-3p	5	5	+1	GGAGACTGATGAGTTCCCGGGA	GAGACTGATGAGTTCCCGGGA
hsa-miR-365b-5p	4	4	-1	AGGGACTTTCAGGGGCAGCTGT	GAGGGACTTTCAGGGGCAGCTGT
hsa-miR-371a-3p	4	4	+2	AAGTGCCGCCATCTTTTGAGTGT	GTGCCGCCATCTTTTGAGTGT
hsa-miR-449c-5p	4	4	+1	TAGGCAGTGTATTGCTAGCGGCTGT	AGGCAGTGTATTGCTAGCGGCTGTT
hsa-miR-548f-3p	4	4	+2	AAAAACTGTAATTACTTTT	AAACTGTAATTACTTTTGGACC
hsa-miR-1277-5p	3	3	+3	AAATATATATATATATGTACGTAT	TATATATATATATGTACGTATG
hsa-miR-1292-5p	3	3	+3	TGGGAACGGGTTCCGGCAGACGCTG	GAACGGGTTCCGGCAGACGCTGA
hsa-miR-190a-3p	3	3	-1	CTATATATCAAACATATTCCT	ACTATATATCAAACATATTCC
hsa-miR-324-3p	3	3	-2	ACTGCCCCAGGTGCTGCTGG	CCACTGCCCCAGGTGCTGCTG
hsa-miR-548p	3	3	+3	TAGCAAAAACTGCAGTTACTTT	CAAAAACTGCAGTTACTTTTGC
hsa-miR-549a	3	3	-1	TGACAACTATGGATGAGCTCT	GTGACAACTATGGATGAGCTCT
hsa-miR-935	3	3	_1	CCAGTTACCGCTTCCGCTACCGC	CAGTTACCGCTTCCGCTACCGC
hsa-miR-101-5p	2	2	-1	CAGTTATCACAGTGCTGATGCT	TCAGTTATCACAGTGCTGATGC
hsa-miR-1303	2	2	-1	TTTAGAGACGGGGTCTTGCTCT	TTTTAGAGACGGGGTCTTGCTCT
hsa-miR-149-3p	2	2	-1	AGGGAGGGACGGGGGCTGTGC	GAGGGAGGGACGGGGGCTGTG
hsa-miR-153-5p	2	2	-1	TCATTTTTGTGATGTTGCAGCT	GTCATTTTTGTGATGTTGCAGCT
hsa-miR-196a-3p	2	2	-1	CGGCAACAAGAAACTGCCTGAG	TCGGCAACAAGAAACTGTCTGA
hsa-miR-29c-5p	2	2	+2	TGACCGATTTCTCCTGGTGTTC	ACCGATTTCTCCTGGTGTTCAGA
hsa-miR-1283	1	1	+1	TCTACAAAGGAAAGCGCTTTCT	CTACAAAGGAAAGCGCTTTCTG
hsa-miR-2116-3p	1	1	-1	CCTCCCATGCCAAGAACTCCC	TCCTCCCATGCCAAGAACTCC
hsa-miR-216b-3p	1	1	-1	ACACACTTACCCGTAGAGATTCTA	CACACTTACCCGTAGAGATTCT
hsa-miR-34b-5p	1	1	+1	TAGGCAGTGTCATTAGCTGATTG	AGGCAGTGTCATTAGCTGATTGT
hsa-miR-380-5p	1	1	-1	TGGTTGACCATAGAACATGCGC	ATGGTTGACCATAGAACATGCG
hsa-miR-506-3p	1	1	-2	TAAGGCACCCTTCTGAGTAGA	TGTAAGGCACCCTTCTGAGTAGA
hsa-miR-512-5p	1	1	+1	CACTCAGCCTTGAGGGCACTTTC	ACTCAGCCTTGAGGGCACTTTC
hsa-miR-523-3p	1	1	+1	GAACGCGCTTCCCTATAGAGGGT	AACGCGCTTCCCTATAGAGGGT
hsa-miR-652-5p	1	1	+1	CAACCCTAGGAGAGGGTGCCATTCA	ACAACCCTAGGAGAGGGTGCCAT
hsa-miR-653-5p	1	1	+3	GTGTTGAAACAATCTCTACTG	TTGAAACAATCTCTACTGAACC
hsa-miR-140-3p	113	116	+1	TACCACAGGGTAGAACCACGG	ACCACAGGGTAGAACCACGGA
hsa-miR-101-3p	106	110	-1	TACAGTACTGTGATAACTGAA	GTACAGTACTGTGATAACTGA
hsa-miR-142-3p	26	27	+3	TGTAGTGTTTCCTACTTTATGGA	AGTGTTTCCTACTTTATGGATG
hsa-miR-24-2-5p	49	51	-1	TGCCTACTGAGCTGAAACACAG	GTGCCTACTGAGCTGAAACACAGT
hsa-miR-452-5p	19	20	+3	AACTGTTTGCAGAGGAAACTGA	TGTTTGCAGAGGAAACTGAGAC
hsa-miR-148b-5p	37	39	-1	AAGTTCTGTTATACACTCAGGC	GAAGTTCTGTTATACACTCAGGCT
hsa-miR-16-2-3p	16	17	-1	CCAATATTACTGTGCTGCTTTA	ACCAATATTACTGTGCTGCTTT
hsa-miR-504-5p	15	16	+1	AGACCCTGGTCTGCACTCTATC	GACCCTGGTCTGCACTCTATC
hsa-miR-142-5p	36	40	-2	CATAAAGTAGAAAGCACTACT	CCCATAAAGTAGAAAGCACT
hsa-miR-873-5p	6	7	-1	GCAGGAACTTGTGAGTCTCCT	TGCAGGAACTTGTGAGTCT
hsa-miR-342-5p	21	25	+1	AGGGGTGCTATCTGTGATTGA	GGGGTGCTATCTGTGATTGAGGGAC
hsa-miR-1307-3p	76	95	+1	ACTCGGCGTGGCGTCGGTCGTG	CTCGGCGTGGCGTCGGTCGTGG
hsa-miR-9-3p	12	15	+1	ATAAAGCTAGATAACCGAAAGT	TAAAGCTAGATAACCGAAAGTA
hsa-miR-367-3p	4	5	+1	AATTGCACTTTAGCAATGGTGA	ATTGCACTTTAGCAATGGTGA
hsa-let-7a-3p	42	53	+1	CTATACAATCTACTGTCTTTC	TATACAATCTACTGTCTTTCCT
hsa-miR-409-3p	50	64	-1	GAATGTTGCTCGGTGAACCCCT	CGAATGTTGCTCGGTGAACCCCT
hsa-miR-361-3p	45	60	+1	TCCCCCAGGTGTGATTCTGATTT	CCCCCAGGTGTGATTCTGATTTGC
hsa-miR-183-5p	21	28	+1	TATGGCACTGGTAGAATTCACT	ATGGCACTGGTAGAATTCACTG
hsa-miR-299-3p	9	12	-1	TATGTGGGATGGTAAACCGCTT	GTATGTGGGATGGTAAACCGCT
hsa-miR-23b-5p	6	8	+1	TGGGTTCCTGGCATGCTGATTT	GGGTTCCTGGCATGCTGATTT
hsa-miR-505-3p	6	8	+1	CGTCAACACTTGCTGGTTTCCT	GTCAACACTTGCTGGTTTCCTCT
hsa-miR-4532	43	61	+1	CCCCGGGGAGCCCGGCG	CCCGGGGAGCCCGGCGG
hsa-miR-133b	6	9	+1	TTTGGTCCCCTTCAACCAGCTA	TTGGTCCCCTTCAACCAGC
hsa-miR-127-5p	9	14	+2	CTGAAGCTCAGAGGGCTCTGAT	GAAGCTCAGAGGGCTCTGATTC
hsa-miR-133a-3p	7	11	+1	TTTGGTCCCCTTCAACCAGCTG	TTGGTCCCCTTCAACCAGCTGT
hsa-miR-2277-3p	16	27	-1	TGACAGCGCCCTGCCTGGCTC	CTGACAGCGCCCTGCCTGGCTCG
hsa-miR-217	9	16	-1	TACTGCATCAGGAACTGATTGGA	ATACTGCATCAGGAACTGATT
hsa-miR-106b-3p	35	65	-2	CCGCACTGTGGGTACTTGCTGC	TACCGCACTGTGGGTACTTGCT
hsa-miR-152-5p	3	6	-1	AGGTTCTGTGATACACTCCGACT	CAGGTTCTGTGATACACTCCGACT
hsa-miR-1179	2	4	+1	AAGCATTCTTTCATTGGTTGG	AGAAGCATTCTTTCATTGGTTG
hsa-miR-147b	2	4	-1	GTGTGCGGAAATGCTTCTGCTA	AGTGTGCGGAAATGCTTCTGCT
hsa-miR-105-5p	1	2	+2	TCAAATGCTCAGACTCCTGTGGT	AAATGCTCAGACTCCTGTGGTG
hsa-miR-126-3p	13	30	+1	TCGTACCGTGAGTAATAATGCG	CGTACCGTGAGTAATAATGCG
hsa-miR-222-5p	5	12	-2	CTCAGTAGCCAGTGTAGATCCT	GGCTCAGTAGCCAGTGTAGATCC
