# Supplementary material for: Toward the human cellular microRNAome
Source: HighWire-hosted journal article supplement (doi:10.1101/gr.222067.117), 2017-09-06
Supplement: Supplemental_Table_S13.xlsx [file Supplemental_Table_S13.xlsx]

## Sheet: Sheet1
microRNA	miRBase v21 Canonical Sequence	Actual Canonical Sequence (by % abundance)	Sample Size	C-4	C-3	C-2	C-1	Canonical	C+1	C+2	C+3	C+4	C-4	C-3	C-2	C-1	Canonical	C+1	C+2	C+3	C+4
hsa-let-7c-3p	CTGTACAACCTTCTAGCTTTCC	CTGTACAACCTTCTAGCTTTCC	2	0	0	0	0	2	0	0	0	0	0	0	0	0	1	0	0	0	0
hsa-let-7e-3p	CTATACGGCCTCCTAGCTTTCC	CTATACGGCCTCCTAGCTTTCC	2	0	0	0	0	2	0	0	0	0	0	0	0	0	1	0	0	0	0
hsa-let-7f-2-3p	CTATACAGTCTACTGTCTTTCC	CTATACAGTCTACTGTCTTTCC	4	0	0	0	0	4	0	0	0	0	0	0	0	0	1	0	0	0	0
hsa-miR-100-3p	CAAGCTTGTATCTATAGGTATG	CAAGCTTGTATCTATAGGTATG	11	0	0	0	0	11	0	0	0	0	0	0	0	0	1	0	0	0	0
hsa-miR-10b-3p	ACAGATTCGATTCTAGGGGAAT	ACAGATTCGATTCTAGGGGAAT	1	0	0	0	0	1	0	0	0	0	0	0	0	0	1	0	0	0	0
hsa-miR-1180-3p	TTTCCGGCTCGCGTGGGTGTGT	TTTCCGGCTCGCGTGGGTGTGT	36	0	0	0	0	36	0	0	0	0	0	0	0	0	1	0	0	0	0
hsa-miR-1226-3p	TCACCAGCCCTGTGTTCCCTAG	TCACCAGCCCTGTGTTCCCTAG	1	0	0	0	0	1	0	0	0	0	0	0	0	0	1	0	0	0	0
hsa-miR-124-3p	TAAGGCACGCGGTGAATGCC	TAAGGCACGCGGTGAATGCC	1	0	0	0	0	1	0	0	0	0	0	0	0	0	1	0	0	0	0
hsa-miR-1247-5p	ACCCGTCCCGTTCGTCCCCGGA	ACCCGTCCCGTTCGTCCCCGGA	1	0	0	0	0	1	0	0	0	0	0	0	0	0	1	0	0	0	0
hsa-miR-1254	AGCCTGGAAGCTGGAGCCTGCAGT	AGCCTGGAAGCTGGAGCCTGCAGT	1	0	0	0	0	1	0	0	0	0	0	0	0	0	1	0	0	0	0
hsa-miR-125a-3p	ACAGGTGAGGTTCTTGGGAGCC	ACAGGTGAGGTTCTTGGGAGCC	5	0	0	0	0	5	0	0	0	0	0	0	0	0	1	0	0	0	0
hsa-miR-1270	CTGGAGATATGGAAGAGCTGTGT	CTGGAGATATGGAAGAGCTGTGT	1	0	0	0	0	1	0	0	0	0	0	0	0	0	1	0	0	0	0
hsa-miR-1271-3p	AGTGCCTGCTATGTGCCAGGCA	AGTGCCTGCTATGTGCCAGGCA	1	0	0	0	0	1	0	0	0	0	0	0	0	0	1	0	0	0	0
hsa-miR-1277-3p	TACGTAGATATATATGTATTTT	TACGTAGATATATATGTATTTT	1	0	0	0	0	1	0	0	0	0	0	0	0	0	1	0	0	0	0
hsa-miR-1278	TAGTACTGTGCATATCATCTAT	TAGTACTGTGCATATCATCTAT	9	0	0	0	0	9	0	0	0	0	0	0	0	0	1	0	0	0	0
hsa-miR-128-2-5p	GGGGGCCGATACACTGTACGAGA	GGGGGCCGATACACTGTACGAGA	2	0	0	0	0	2	0	0	0	0	0	0	0	0	1	0	0	0	0
hsa-miR-1286	TGCAGGACCAAGATGAGCCCT	TGCAGGACCAAGATGAGCCCT	1	0	0	0	0	1	0	0	0	0	0	0	0	0	1	0	0	0	0
hsa-miR-1287-5p	TGCTGGATCAGTGGTTCGAGTC	TGCTGGATCAGTGGTTCGAGTC	6	0	0	0	0	6	0	0	0	0	0	0	0	0	1	0	0	0	0
hsa-miR-1296-5p	TTAGGGCCCTGGCTCCATCTCC	TTAGGGCCCTGGCTCCATCTCC	17	0	0	0	0	17	0	0	0	0	0	0	0	0	1	0	0	0	0
hsa-miR-1299	TTCTGGAATTCTGTGTGAGGGA	TTCTGGAATTCTGTGTGAGGGA	3	0	0	0	0	3	0	0	0	0	0	0	0	0	1	0	0	0	0
hsa-miR-1304-5p	TTTGAGGCTACAGTGAGATGTG	TTTGAGGCTACAGTGAGATGTG	9	0	0	0	0	9	0	0	0	0	0	0	0	0	1	0	0	0	0
hsa-miR-1305	TTTTCAACTCTAATGGGAGAGA	TTTTCAACTCTAATGGGAGAGA	1	0	0	0	0	1	0	0	0	0	0	0	0	0	1	0	0	0	0
hsa-miR-1306-5p	CCACCTCCCCTGCAAACGTCCA	CCACCTCCCCTGCAAACGTCCA	3	0	0	0	0	3	0	0	0	0	0	0	0	0	1	0	0	0	0
hsa-miR-132-5p	ACCGTGGCTTTCGATTGTTACT	ACCGTGGCTTTCGATTGTTACT	9	0	0	0	0	9	0	0	0	0	0	0	0	0	1	0	0	0	0
hsa-miR-134-5p	TGTGACTGGTTGACCAGAGGGG	TGTGACTGGTTGACCAGAGGGG	4	0	0	0	0	4	0	0	0	0	0	0	0	0	1	0	0	0	0
hsa-miR-152-5p	AGGTTCTGTGATACACTCCGACT	AGGTTCTGTGATACACTCCGACT	2	0	0	0	0	2	0	0	0	0	0	0	0	0	1	0	0	0	0
hsa-miR-1910-5p	CCAGTCCTGTGCCTGCCGCCT	CCAGTCCTGTGCCTGCCGCCT	1	0	0	0	0	1	0	0	0	0	0	0	0	0	1	0	0	0	0
hsa-miR-194-3p	CCAGTGGGGCTGCTGTTATCTG	CCAGTGGGGCTGCTGTTATCTG	8	0	0	0	0	8	0	0	0	0	0	0	0	0	1	0	0	0	0
hsa-miR-19b-1-5p	AGTTTTGCAGGTTTGCATCCAGC	AGTTTTGCAGGTTTGCATCCAGC	1	0	0	0	0	1	0	0	0	0	0	0	0	0	1	0	0	0	0
hsa-miR-200a-5p	CATCTTACCGGACAGTGCTGGA	CATCTTACCGGACAGTGCTGGA	12	0	0	0	0	12	0	0	0	0	0	0	0	0	1	0	0	0	0
hsa-miR-210-5p	AGCCCCTGCCCACCGCACACTG	AGCCCCTGCCCACCGCACACTG	1	0	0	0	0	1	0	0	0	0	0	0	0	0	1	0	0	0	0
hsa-miR-212-3p	TAACAGTCTCCAGTCACGGCC	TAACAGTCTCCAGTCACGGCC	1	0	0	0	0	1	0	0	0	0	0	0	0	0	1	0	0	0	0
hsa-miR-212-5p	ACCTTGGCTCTAGACTGCTTACT	ACCTTGGCTCTAGACTGCTTACT	3	0	0	0	0	3	0	0	0	0	0	0	0	0	1	0	0	0	0
hsa-miR-214-3p	ACAGCAGGCACAGACAGGCAGT	ACAGCAGGCACAGACAGGCAGT	6	0	0	0	0	6	0	0	0	0	0	0	0	0	1	0	0	0	0
hsa-miR-214-5p	TGCCTGTCTACACTTGCTGTGC	TGCCTGTCTACACTTGCTGTGC	1	0	0	0	0	1	0	0	0	0	0	0	0	0	1	0	0	0	0
hsa-miR-219a-1-3p	AGAGTTGAGTCTGGACGTCCCG	AGAGTTGAGTCTGGACGTCCCG	2	0	0	0	0	2	0	0	0	0	0	0	0	0	1	0	0	0	0
hsa-miR-2277-5p	AGCGCGGGCTGAGCGCTGCCAGTC	AGCGCGGGCTGAGCGCTGCCAGTC	2	0	0	0	0	2	0	0	0	0	0	0	0	0	1	0	0	0	0
hsa-miR-23a-5p	GGGGTTCCTGGGGATGGGATTT	GGGGTTCCTGGGGATGGGATTT	1	0	0	0	0	1	0	0	0	0	0	0	0	0	1	0	0	0	0
hsa-miR-23b-5p	TGGGTTCCTGGCATGCTGATTT	TGGGTTCCTGGCATGCTGATTT	5	0	0	0	0	5	0	0	0	0	0	0	0	0	1	0	0	0	0
hsa-miR-24-1-5p	TGCCTACTGAGCTGATATCAGT	TGCCTACTGAGCTGATATCAGT	2	0	0	0	0	2	0	0	0	0	0	0	0	0	1	0	0	0	0
hsa-miR-2682-5p	CAGGCAGTGACTGTTCAGACGTC	CAGGCAGTGACTGTTCAGACGTC	3	0	0	0	0	3	0	0	0	0	0	0	0	0	1	0	0	0	0
hsa-miR-26a-2-3p	CCTATTCTTGATTACTTGTTTC	CCTATTCTTGATTACTTGTTTC	2	0	0	0	0	2	0	0	0	0	0	0	0	0	1	0	0	0	0
hsa-miR-26b-3p	CCTGTTCTCCATTACTTGGCTC	CCTGTTCTCCATTACTTGGCTC	4	0	0	0	0	4	0	0	0	0	0	0	0	0	1	0	0	0	0
hsa-miR-296-5p	AGGGCCCCCCCTCAATCCTGT	AGGGCCCCCCCTCAATCCTGT	1	0	0	0	0	1	0	0	0	0	0	0	0	0	1	0	0	0	0
hsa-miR-29b-1-5p	GCTGGTTTCATATGGTGGTTTAGA	GCTGGTTTCATATGGTGGTTTAGA	4	0	0	0	0	4	0	0	0	0	0	0	0	0	1	0	0	0	0
hsa-miR-301a-5p	GCTCTGACTTTATTGCACTACT	GCTCTGACTTTATTGCACTACT	8	0	0	0	0	8	0	0	0	0	0	0	0	0	1	0	0	0	0
hsa-miR-301b-3p	CAGTGCAATGATATTGTCAAAGC	CAGTGCAATGATATTGTCAAAGC	35	0	0	0	0	35	0	0	0	0	0	0	0	0	1	0	0	0	0
hsa-miR-302b-3p	TAAGTGCTTCCATGTTTTAGTAG	TAAGTGCTTCCATGTTTTAGTAG	1	0	0	0	0	1	0	0	0	0	0	0	0	0	1	0	0	0	0
hsa-miR-30c-1-3p	CTGGGAGAGGGTTGTTTACTCC	CTGGGAGAGGGTTGTTTACTCC	8	0	0	0	0	8	0	0	0	0	0	0	0	0	1	0	0	0	0
hsa-miR-30d-3p	CTTTCAGTCAGATGTTTGCTGC	CTTTCAGTCAGATGTTTGCTGC	23	0	0	0	0	23	0	0	0	0	0	0	0	0	1	0	0	0	0
hsa-miR-3177-3p	TGCACGGCACTGGGGACACGT	TGCACGGCACTGGGGACACGT	1	0	0	0	0	1	0	0	0	0	0	0	0	0	1	0	0	0	0
hsa-miR-3187-3p	TTGGCCATGGGGCTGCGCGG	TTGGCCATGGGGCTGCGCGG	1	0	0	0	0	1	0	0	0	0	0	0	0	0	1	0	0	0	0
hsa-miR-326	CCTCTGGGCCCTTCCTCCAG	CCTCTGGGCCCTTCCTCCAG	3	0	0	0	0	3	0	0	0	0	0	0	0	0	1	0	0	0	0
hsa-miR-328-3p	CTGGCCCTCTCTGCCCTTCCGT	CTGGCCCTCTCTGCCCTTCCGT	7	0	0	0	0	7	0	0	0	0	0	0	0	0	1	0	0	0	0
hsa-miR-3605-3p	CCTCCGTGTTACCTGTCCTCTAG	CCTCCGTGTTACCTGTCCTCTAG	2	0	0	0	0	2	0	0	0	0	0	0	0	0	1	0	0	0	0
hsa-miR-3607-3p	ACTGTAAACGCTTTCTGATG	ACTGTAAACGCTTTCTGATG	3	0	0	0	0	3	0	0	0	0	0	0	0	0	1	0	0	0	0
hsa-miR-3660	ACTGACAGGAGAGCATTTTGA	ACTGACAGGAGAGCATTTTGA	2	0	0	0	0	2	0	0	0	0	0	0	0	0	1	0	0	0	0
hsa-miR-3677-3p	CTCGTGGGCTCTGGCCACGGCC	CTCGTGGGCTCTGGCCACGGCC	2	0	0	0	0	2	0	0	0	0	0	0	0	0	1	0	0	0	0
hsa-miR-3681-5p	TAGTGGATGATGCACTCTGTGC	TAGTGGATGATGCACTCTGTGC	3	0	0	0	0	3	0	0	0	0	0	0	0	0	1	0	0	0	0
hsa-miR-3689a-5p	TGTGATATCATGGTTCCTGGGA	TGTGATATCATGGTTCCTGGGA	2	0	0	0	0	2	0	0	0	0	0	0	0	0	1	0	0	0	0
hsa-miR-370-3p	GCCTGCTGGGGTGGAACCTGGT	GCCTGCTGGGGTGGAACCTGGT	2	0	0	0	0	2	0	0	0	0	0	0	0	0	1	0	0	0	0
hsa-miR-371a-3p	AAGTGCCGCCATCTTTTGAGTGT	AAGTGCCGCCATCTTTTGAGTGT	2	0	0	0	0	2	0	0	0	0	0	0	0	0	1	0	0	0	0
hsa-miR-371a-5p	ACTCAAACTGTGGGGGCACT	ACTCAAACTGTGGGGGCACT	7	0	0	0	0	7	0	0	0	0	0	0	0	0	1	0	0	0	0
hsa-miR-372-3p	AAAGTGCTGCGACATTTGAGCGT	AAAGTGCTGCGACATTTGAGCGT	9	0	0	0	0	9	0	0	0	0	0	0	0	0	1	0	0	0	0
hsa-miR-373-3p	GAAGTGCTTCGATTTTGGGGTGT	GAAGTGCTTCGATTTTGGGGTGT	2	0	0	0	0	2	0	0	0	0	0	0	0	0	1	0	0	0	0
hsa-miR-374b-3p	CTTAGCAGGTTGTATTATCATT	CTTAGCAGGTTGTATTATCATT	8	0	0	0	0	8	0	0	0	0	0	0	0	0	1	0	0	0	0
hsa-miR-378i	ACTGGACTAGGAGTCAGAAGG	ACTGGACTAGGAGTCAGAAGG	1	0	0	0	0	1	0	0	0	0	0	0	0	0	1	0	0	0	0
hsa-miR-382-5p	GAAGTTGTTCGTGGTGGATTCG	GAAGTTGTTCGTGGTGGATTCG	2	0	0	0	0	2	0	0	0	0	0	0	0	0	1	0	0	0	0
hsa-miR-3909	TGTCCTCTAGGGCCTGCAGTCT	TGTCCTCTAGGGCCTGCAGTCT	10	0	0	0	0	10	0	0	0	0	0	0	0	0	1	0	0	0	0
hsa-miR-3928-3p	GGAGGAACCTTGGAGCTTCGGC	GGAGGAACCTTGGAGCTTCGGC	2	0	0	0	0	2	0	0	0	0	0	0	0	0	1	0	0	0	0
hsa-miR-409-3p	GAATGTTGCTCGGTGAACCCCT	GAATGTTGCTCGGTGAACCCCT	9	0	0	0	0	9	0	0	0	0	0	0	0	0	1	0	0	0	0
hsa-miR-410-3p	AATATAACACAGATGGCCTGT	AATATAACACAGATGGCCTGT	7	0	0	0	0	7	0	0	0	0	0	0	0	0	1	0	0	0	0
hsa-miR-4661-5p	AACTAGCTCTGTGGATCCTGAC	AACTAGCTCTGTGGATCCTGAC	4	0	0	0	0	4	0	0	0	0	0	0	0	0	1	0	0	0	0
hsa-miR-4664-3p	CTTCCGGTCTGTGAGCCCCGTC	CTTCCGGTCTGTGAGCCCCGTC	6	0	0	0	0	6	0	0	0	0	0	0	0	0	1	0	0	0	0
hsa-miR-4677-3p	TCTGTGAGACCAAAGAACTACT	TCTGTGAGACCAAAGAACTACT	3	0	0	0	0	3	0	0	0	0	0	0	0	0	1	0	0	0	0
hsa-miR-4746-5p	CCGGTCCCAGGAGAACCTGCAGA	CCGGTCCCAGGAGAACCTGCAGA	2	0	0	0	0	2	0	0	0	0	0	0	0	0	1	0	0	0	0
hsa-miR-483-5p	AAGACGGGAGGAAAGAAGGGAG	AAGACGGGAGGAAAGAAGGGAG	12	0	0	0	0	12	0	0	0	0	0	0	0	0	1	0	0	0	0
hsa-miR-486-3p	CGGGGCAGCTCAGTACAGGAT	CGGGGCAGCTCAGTACAGGAT	5	0	0	0	0	5	0	0	0	0	0	0	0	0	1	0	0	0	0
hsa-miR-487b-3p	AATCGTACAGGGTCATCCACTT	AATCGTACAGGGTCATCCACTT	2	0	0	0	0	2	0	0	0	0	0	0	0	0	1	0	0	0	0
hsa-miR-490-5p	CCATGGATCTCCAGGTGGGT	CCATGGATCTCCAGGTGGGT	1	0	0	0	0	1	0	0	0	0	0	0	0	0	1	0	0	0	0
hsa-miR-493-3p	TGAAGGTCTACTGTGTGCCAGG	TGAAGGTCTACTGTGTGCCAGG	4	0	0	0	0	4	0	0	0	0	0	0	0	0	1	0	0	0	0
hsa-miR-493-5p	TTGTACATGGTAGGCTTTCATT	TTGTACATGGTAGGCTTTCATT	3	0	0	0	0	3	0	0	0	0	0	0	0	0	1	0	0	0	0
hsa-miR-5001-3p	TTCTGCCTCTGTCCAGGTCCTT	TTCTGCCTCTGTCCAGGTCCTT	1	0	0	0	0	1	0	0	0	0	0	0	0	0	1	0	0	0	0
hsa-miR-504-5p	AGACCCTGGTCTGCACTCTATC	AGACCCTGGTCTGCACTCTATC	2	0	0	0	0	2	0	0	0	0	0	0	0	0	1	0	0	0	0
hsa-miR-518f-3p	GAAAGCGCTTCTCTTTAGAGG	GAAAGCGCTTCTCTTTAGAGG	1	0	0	0	0	1	0	0	0	0	0	0	0	0	1	0	0	0	0
hsa-miR-532-3p	CCTCCCACACCCAAGGCTTGCA	CCTCCCACACCCAAGGCTTGCA	3	0	0	0	0	3	0	0	0	0	0	0	0	0	1	0	0	0	0
hsa-miR-539-3p	ATCATACAAGGACAATTTCTTT	ATCATACAAGGACAATTTCTTT	2	0	0	0	0	2	0	0	0	0	0	0	0	0	1	0	0	0	0
hsa-miR-543	AAACATTCGCGGTGCACTTCTT	AAACATTCGCGGTGCACTTCTT	1	0	0	0	0	1	0	0	0	0	0	0	0	0	1	0	0	0	0
hsa-miR-548b-5p	AAAAGTAATTGTGGTTTTGGCC	AAAAGTAATTGTGGTTTTGGCC	1	0	0	0	0	1	0	0	0	0	0	0	0	0	1	0	0	0	0
hsa-miR-548k	AAAAGTACTTGCGGATTTTGCT	AAAAGTACTTGCGGATTTTGCT	21	0	0	0	0	21	0	0	0	0	0	0	0	0	1	0	0	0	0
hsa-miR-548n	CAAAAGTAATTGTGGATTTTGT	CAAAAGTAATTGTGGATTTTGT	1	0	0	0	0	1	0	0	0	0	0	0	0	0	1	0	0	0	0
hsa-miR-548o-3p	CCAAAACTGCAGTTACTTTTGC	CCAAAACTGCAGTTACTTTTGC	15	0	0	0	0	15	0	0	0	0	0	0	0	0	1	0	0	0	0
hsa-miR-549a	TGACAACTATGGATGAGCTCT	TGACAACTATGGATGAGCTCT	11	0	0	0	0	11	0	0	0	0	0	0	0	0	1	0	0	0	0
hsa-miR-550a-3p	TGTCTTACTCCCTCAGGCACAT	TGTCTTACTCCCTCAGGCACAT	1	0	0	0	0	1	0	0	0	0	0	0	0	0	1	0	0	0	0
hsa-miR-582-5p	TTACAGTTGTTCAACCAGTTACT	TTACAGTTGTTCAACCAGTTACT	21	0	0	0	0	21	0	0	0	0	0	0	0	0	1	0	0	0	0
hsa-miR-584-3p	TCAGTTCCAGGCCAACCAGGCT	TCAGTTCCAGGCCAACCAGGCT	1	0	0	0	0	1	0	0	0	0	0	0	0	0	1	0	0	0	0
hsa-miR-589-3p	TCAGAACAAATGCCGGTTCCCAGA	TCAGAACAAATGCCGGTTCCCAGA	9	0	0	0	0	9	0	0	0	0	0	0	0	0	1	0	0	0	0
hsa-miR-590-5p	GAGCTTATTCATAAAAGTGCAG	GAGCTTATTCATAAAAGTGCAG	3	0	0	0	0	3	0	0	0	0	0	0	0	0	1	0	0	0	0
hsa-miR-592	TTGTGTCAATATGCGATGATGT	TTGTGTCAATATGCGATGATGT	3	0	0	0	0	3	0	0	0	0	0	0	0	0	1	0	0	0	0
hsa-miR-615-5p	GGGGGTCCCCGGTGCTCGGATC	GGGGGTCCCCGGTGCTCGGATC	1	0	0	0	0	1	0	0	0	0	0	0	0	0	1	0	0	0	0
hsa-miR-618	AAACTCTACTTGTCCTTCTGAGT	AAACTCTACTTGTCCTTCTGAGT	2	0	0	0	0	2	0	0	0	0	0	0	0	0	1	0	0	0	0
hsa-miR-627-5p	GTGAGTCTCTAAGAAAAGAGGA	GTGAGTCTCTAAGAAAAGAGGA	3	0	0	0	0	3	0	0	0	0	0	0	0	0	1	0	0	0	0
hsa-miR-629-3p	GTTCTCCCAACGTAAGCCCAGC	GTTCTCCCAACGTAAGCCCAGC	2	0	0	0	0	2	0	0	0	0	0	0	0	0	1	0	0	0	0
hsa-miR-651-5p	TTTAGGATAAGCTTGACTTTTG	TTTAGGATAAGCTTGACTTTTG	11	0	0	0	0	11	0	0	0	0	0	0	0	0	1	0	0	0	0
hsa-miR-653-5p	GTGTTGAAACAATCTCTACTG	GTGTTGAAACAATCTCTACTG	2	0	0	0	0	2	0	0	0	0	0	0	0	0	1	0	0	0	0
hsa-miR-654-5p	TGGTGGGCCGCAGAACATGTGC	TGGTGGGCCGCAGAACATGTGC	1	0	0	0	0	1	0	0	0	0	0	0	0	0	1	0	0	0	0
hsa-miR-671-3p	TCCGGTTCTCAGGGCTCCACC	TCCGGTTCTCAGGGCTCCACC	34	0	0	0	0	34	0	0	0	0	0	0	0	0	1	0	0	0	0
hsa-miR-7-1-3p	CAACAAATCACAGTCTGCCATA	CAACAAATCACAGTCTGCCATA	9	0	0	0	0	9	0	0	0	0	0	0	0	0	1	0	0	0	0
hsa-miR-766-3p	ACTCCAGCCCCACAGCCTCAGC	ACTCCAGCCCCACAGCCTCAGC	9	0	0	0	0	9	0	0	0	0	0	0	0	0	1	0	0	0	0
hsa-miR-769-3p	CTGGGATCTCCGGGGTCTTGGTT	CTGGGATCTCCGGGGTCTTGGTT	2	0	0	0	0	2	0	0	0	0	0	0	0	0	1	0	0	0	0
hsa-miR-7974	AGGCTGTGATGCTCTCCTGAGCCC	AGGCTGTGATGCTCTCCTGAGCCC	45	0	0	0	0	45	0	0	0	0	0	0	0	0	1	0	0	0	0
hsa-miR-873-3p	GGAGACTGATGAGTTCCCGGGA	GGAGACTGATGAGTTCCCGGGA	1	0	0	0	0	1	0	0	0	0	0	0	0	0	1	0	0	0	0
hsa-miR-889-3p	TTAATATCGGACAACCATTGT	TTAATATCGGACAACCATTGT	7	0	0	0	0	7	0	0	0	0	0	0	0	0	1	0	0	0	0
hsa-miR-92a-1-5p	AGGTTGGGATCGGTTGCAATGCT	AGGTTGGGATCGGTTGCAATGCT	16	0	0	0	0	16	0	0	0	0	0	0	0	0	1	0	0	0	0
hsa-miR-937-3p	ATCCGCGCTCTGACTCTCTGCC	ATCCGCGCTCTGACTCTCTGCC	3	0	0	0	0	3	0	0	0	0	0	0	0	0	1	0	0	0	0
hsa-miR-574-3p	CACGCTCATGCACACACCCACA	CACGCTCATGCACACACCCACA	36	0	1	0	0	35	0	0	0	0	0	0.0277778	0	0	0.972222	0	0	0	0
hsa-miR-941	CACCCGGCTGTGTGCACATGTGC	CACCCGGCTGTGTGCACATGTGC	64	0	0	0	2	62	0	0	0	0	0	0	0	0.03125	0.96875	0	0	0	0
hsa-miR-22-3p	AAGCTGCCAGTTGAAGAACTGT	AAGCTGCCAGTTGAAGAACTGT	72	0	0	1	2	69	0	0	0	0	0	0	0.0138889	0.0277778	0.958333	0	0	0	0
hsa-miR-423-5p	TGAGGGGCAGAGAGCGAGACTTT	TGAGGGGCAGAGAGCGAGACTTT	72	0	0	0	3	69	0	0	0	0	0	0	0	0.0416667	0.958333	0	0	0	0
hsa-miR-28-3p	CACTAGATTGTGAGCTCCTGGA	CACTAGATTGTGAGCTCCTGGA	71	0	0	0	3	68	0	0	0	0	0	0	0	0.0422535	0.957746	0	0	0	0
hsa-let-7d-5p	AGAGGTAGTAGGTTGCATAGTT	AGAGGTAGTAGGTTGCATAGTT	70	0	1	0	2	67	0	0	0	0	0	0.0142857	0	0.0285714	0.957143	0	0	0	0
hsa-miR-365b-3p	TAATGCCCCTAAAAATCCTTAT	TAATGCCCCTAAAAATCCTTAT	23	0	0	1	0	22	0	0	0	0	0	0	0.0434783	0	0.956522	0	0	0	0
hsa-miR-455-5p	TATGTGCCTTTGGACTACATCG	TATGTGCCTTTGGACTACATCG	22	0	0	0	0	21	0	1	0	0	0	0	0	0	0.954545	0	0.0454545	0	0
hsa-let-7a-5p	TGAGGTAGTAGGTTGTATAGTT	TGAGGTAGTAGGTTGTATAGTT	79	0	1	0	3	75	0	0	0	0	0	0.0126582	0	0.0379747	0.949367	0	0	0	0
hsa-let-7f-5p	TGAGGTAGTAGATTGTATAGTT	TGAGGTAGTAGATTGTATAGTT	79	0	1	0	3	75	0	0	0	0	0	0.0126582	0	0.0379747	0.949367	0	0	0	0
hsa-miR-16-5p	TAGCAGCACGTAAATATTGGCG	TAGCAGCACGTAAATATTGGCG	79	0	0	0	4	75	0	0	0	0	0	0	0	0.0506329	0.949367	0	0	0	0
hsa-miR-26a-5p	TTCAAGTAATCCAGGATAGGCT	TTCAAGTAATCCAGGATAGGCT	79	0	0	1	3	75	0	0	0	0	0	0	0.0126582	0.0379747	0.949367	0	0	0	0
hsa-let-7e-5p	TGAGGTAGGAGGTTGTATAGTT	TGAGGTAGGAGGTTGTATAGTT	78	0	1	0	3	74	0	0	0	0	0	0.0128205	0	0.0384615	0.948718	0	0	0	0
hsa-let-7g-5p	TGAGGTAGTAGTTTGTACAGTT	TGAGGTAGTAGTTTGTACAGTT	78	0	1	0	3	74	0	0	0	0	0	0.0128205	0	0.0384615	0.948718	0	0	0	0
hsa-miR-210-3p	CTGTGCGTGTGACAGCGGCTGA	CTGTGCGTGTGACAGCGGCTGA	58	0	0	0	3	55	0	0	0	0	0	0	0	0.0517241	0.948276	0	0	0	0
hsa-miR-423-3p	AGCTCGGTCTGAGGCCCCTCAGT	AGCTCGGTCTGAGGCCCCTCAGT	77	0	1	0	3	73	0	0	0	0	0	0.012987	0	0.038961	0.948052	0	0	0	0
hsa-miR-17-5p	CAAAGTGCTTACAGTGCAGGTAG	CAAAGTGCTTACAGTGCAGGTAG	76	0	0	1	3	72	0	0	0	0	0	0	0.0131579	0.0394737	0.947368	0	0	0	0
hsa-miR-28-5p	AAGGAGCTCACAGTCTATTGAG	AAGGAGCTCACAGTCTATTGAG	57	0	0	2	1	54	0	0	0	0	0	0	0.0350877	0.0175439	0.947368	0	0	0	0
hsa-miR-98-5p	TGAGGTAGTAAGTTGTATTGTT	TGAGGTAGTAAGTTGTATTGTT	74	0	1	1	2	70	0	0	0	0	0	0.0135135	0.0135135	0.027027	0.945946	0	0	0	0
hsa-miR-181a-2-3p	ACCACTGACCGTTGACTGTACC	ACCACTGACCGTTGACTGTACC	36	2	0	0	0	34	0	0	0	0	0.0555556	0	0	0	0.944444	0	0	0	0
hsa-miR-301a-3p	CAGTGCAATAGTATTGTCAAAGC	CAGTGCAATAGTATTGTCAAAGC	52	0	0	0	2	49	0	1	0	0	0	0	0	0.0384615	0.942308	0	0.0192308	0	0
hsa-miR-30e-3p	CTTTCAGTCGGATGTTTACAGC	CTTTCAGTCGGATGTTTACAGC	67	0	1	0	3	63	0	0	0	0	0	0.0149254	0	0.0447761	0.940299	0	0	0	0
hsa-miR-128-3p	TCACAGTGAACCGGTCTCTTT	TCACAGTGAACCGGTCTCTTT	66	0	1	0	3	62	0	0	0	0	0	0.0151515	0	0.0454545	0.939394	0	0	0	0
hsa-miR-148a-5p	AAAGTTCTGAGACACTCCGACT	AAAGTTCTGAGACACTCCGACT	49	0	0	0	3	46	0	0	0	0	0	0	0	0.0612245	0.938776	0	0	0	0
hsa-miR-191-5p	CAACGGAATCCCAAAAGCAGCTG	CAACGGAATCCCAAAAGCAGCTG	79	0	1	0	4	74	0	0	0	0	0	0.0126582	0	0.0506329	0.936709	0	0	0	0
hsa-miR-378a-3p	ACTGGACTTGGAGTCAGAAGGC	ACTGGACTTGGAGTCAGAAGGC	77	0	0	0	5	72	0	0	0	0	0	0	0	0.0649351	0.935065	0	0	0	0
hsa-miR-361-5p	TTATCAGAATCTCCAGGGGTAC	TTATCAGAATCTCCAGGGGTAC	61	0	0	1	3	57	0	0	0	0	0	0	0.0163934	0.0491803	0.934426	0	0	0	0
hsa-miR-561-5p	ATCAAGGATCTTAAACTTTGCC	ATCAAGGATCTTAAACTTTGCC	15	0	0	0	1	14	0	0	0	0	0	0	0	0.0666667	0.933333	0	0	0	0
hsa-miR-20a-5p	TAAAGTGCTTATAGTGCAGGTAG	TAAAGTGCTTATAGTGCAGGTAG	73	0	0	1	4	68	0	0	0	0	0	0	0.0136986	0.0547945	0.931507	0	0	0	0
hsa-let-7b-5p	TGAGGTAGTAGGTTGTGTGGTT	TGAGGTAGTAGGTTGTGTGGTT	58	0	1	0	3	54	0	0	0	0	0	0.0172414	0	0.0517241	0.931034	0	0	0	0
hsa-miR-340-5p	TTATAAAGCAATGAGACTGATT	TTATAAAGCAATGAGACTGATT	58	0	1	0	3	54	0	0	0	0	0	0.0172414	0	0.0517241	0.931034	0	0	0	0
hsa-let-7d-3p	CTATACGACCTGCTGCCTTTCT	CTATACGACCTGCTGCCTTTCT	43	0	0	1	2	40	0	0	0	0	0	0	0.0232558	0.0465116	0.930233	0	0	0	0
hsa-miR-15b-5p	TAGCAGCACATCATGGTTTACA	TAGCAGCACATCATGGTTTACA	71	0	1	1	3	66	0	0	0	0	0	0.0140845	0.0140845	0.0422535	0.929577	0	0	0	0
hsa-miR-99b-5p	CACCCGTAGAACCGACCTTGCG	CACCCGTAGAACCGACCTTGCG	71	1	0	0	4	66	0	0	0	0	0.0140845	0	0	0.056338	0.929577	0	0	0	0
hsa-miR-126-5p	CATTATTACTTTTGGTACGCG	CATTATTACTTTTGGTACGCG	28	0	0	0	2	26	0	0	0	0	0	0	0	0.0714286	0.928571	0	0	0	0
hsa-miR-374a-3p	CTTATCAGATTGTATTGTAATT	CTTATCAGATTGTATTGTAATT	54	0	1	0	3	50	0	0	0	0	0	0.0185185	0	0.0555556	0.925926	0	0	0	0
hsa-miR-532-5p	CATGCCTTGAGTGTAGGACCGT	CATGCCTTGAGTGTAGGACCGT	67	0	0	2	3	62	0	0	0	0	0	0	0.0298507	0.0447761	0.925373	0	0	0	0
hsa-miR-92a-3p	TATTGCACTTGTCCCGGCCTGT	TATTGCACTTGTCCCGGCCTGT	79	0	0	3	3	73	0	0	0	0	0	0	0.0379747	0.0379747	0.924051	0	0	0	0
hsa-miR-378a-5p	CTCCTGACTCCAGGTCCTGTGT	CTCCTGACTCCAGGTCCTGTGT	13	0	0	1	0	12	0	0	0	0	0	0	0.0769231	0	0.923077	0	0	0	0
hsa-miR-942-5p	TCTTCTCTGTTTTGGCCATGTG	TCTTCTCTGTTTTGGCCATGTG	13	0	0	0	1	12	0	0	0	0	0	0	0	0.0769231	0.923077	0	0	0	0
hsa-miR-30a-3p	CTTTCAGTCGGATGTTTGCAGC	CTTTCAGTCGGATGTTTGCAGC	38	0	1	0	2	35	0	0	0	0	0	0.0263158	0	0.0526316	0.921053	0	0	0	0
hsa-miR-148b-3p	TCAGTGCATCACAGAACTTTGT	TCAGTGCATCACAGAACTTTGT	72	2	0	1	3	66	0	0	0	0	0.0277778	0	0.0138889	0.0416667	0.916667	0	0	0	0
hsa-miR-193b-3p	AACTGGCCCTCAAAGTCCCGCT	AACTGGCCCTCAAAGTCCCGCT	48	0	0	1	2	44	1	0	0	0	0	0	0.0208333	0.0416667	0.916667	0.0208333	0	0	0
hsa-miR-484	TCAGGCTCAGTCCCCTCCCGAT	TCAGGCTCAGTCCCCTCCCGAT	60	0	0	0	4	55	1	0	0	0	0	0	0	0.0666667	0.916667	0.0166667	0	0	0
hsa-miR-103a-3p	AGCAGCATTGTACAGGGCTATGA	AGCAGCATTGTACAGGGCTATGA	81	1	0	0	4	74	2	0	0	0	0.0123457	0	0	0.0493827	0.91358	0.0246914	0	0	0
hsa-miR-320a	AAAAGCTGGGTTGAGAGGGCGA	AAAAGCTGGGTTGAGAGGGCGA	81	0	0	0	4	74	3	0	0	0	0	0	0	0.0493827	0.91358	0.037037	0	0	0
hsa-miR-30b-5p	TGTAAACATCCTACACTCAGCT	TGTAAACATCCTACACTCAGCT	69	0	0	1	5	63	0	0	0	0	0	0	0.0144928	0.0724638	0.913043	0	0	0	0
hsa-miR-486-5p	TCCTGTACTGAGCTGCCCCGAG	TCCTGTACTGAGCTGCCCCGAG	23	0	0	1	1	21	0	0	0	0	0	0	0.0434783	0.0434783	0.913043	0	0	0	0
hsa-miR-1303	TTTAGAGACGGGGTCTTGCTCT	TTTAGAGACGGGGTCTTGCTCT	11	0	0	0	1	10	0	0	0	0	0	0	0	0.0909091	0.909091	0	0	0	0
hsa-miR-330-3p	GCAAAGCACACGGCCTGCAGAGA	GCAAAGCACACGGCCTGCAGAGA	22	0	0	0	0	20	0	2	0	0	0	0	0	0	0.909091	0	0.0909091	0	0
hsa-miR-421	ATCAACAGACATTAATTGGGCGC	ATCAACAGACATTAATTGGGCGC	52	0	0	0	5	47	0	0	0	0	0	0	0	0.0961538	0.903846	0	0	0	0
hsa-miR-582-3p	TAACTGGTTGAACAACTGAACC	TAACTGGTTGAACAACTGAACC	31	0	0	0	0	28	2	1	0	0	0	0	0	0	0.903226	0.0645161	0.0322581	0	0
hsa-miR-197-3p	TTCACCACCTTCTCCACCCAGC	TTCACCACCTTCTCCACCCAGC	51	0	1	0	3	46	1	0	0	0	0	0.0196078	0	0.0588235	0.901961	0.0196078	0	0	0
hsa-miR-25-3p	CATTGCACTTGTCTCGGTCTGA	CATTGCACTTGTCTCGGTCTGA	81	0	2	2	4	73	0	0	0	0	0	0.0246914	0.0246914	0.0493827	0.901235	0	0	0	0
hsa-miR-106a-5p	AAAAGTGCTTACAGTGCAGGTAG	AAAAGTGCTTACAGTGCAGGTAG	10	0	0	1	0	9	0	0	0	0	0	0	0.1	0	0.9	0	0	0	0
hsa-miR-146a-5p	TGAGAACTGAATTCCATGGGTT	TGAGAACTGAATTCCATGGGTT	30	0	1	0	0	27	2	0	0	0	0	0.0333333	0	0	0.9	0.0666667	0	0	0
hsa-miR-181a-3p	ACCATCGACCGTTGATTGTACC	ACCATCGACCGTTGATTGTACC	50	2	0	0	3	45	0	0	0	0	0.04	0	0	0.06	0.9	0	0	0	0
hsa-miR-362-5p	AATCCTTGGAACCTAGGTGTGAGT	AATCCTTGGAACCTAGGTGTGAGT	10	0	1	0	0	9	0	0	0	0	0	0.1	0	0	0.9	0	0	0	0
hsa-miR-381-3p	TATACAAGGGCAAGCTCTCTGT	TATACAAGGGCAAGCTCTCTGT	10	0	0	1	0	9	0	0	0	0	0	0	0.1	0	0.9	0	0	0	0
hsa-miR-125b-5p	TCCCTGAGACCCTAACTTGTGA	TCCCTGAGACCCTAACTTGTGA	39	0	0	0	4	35	0	0	0	0	0	0	0	0.102564	0.897436	0	0	0	0
hsa-miR-27a-5p	AGGGCTTAGCTGCTTGTGAGCA	AGGGCTTAGCTGCTTGTGAGCA	29	0	0	0	3	26	0	0	0	0	0	0	0	0.103448	0.896552	0	0	0	0
hsa-miR-375	TTTGTTCGTTCGGCTCGCGTGA	TTTGTTCGTTCGGCTCGCGTGA	29	1	0	0	2	26	0	0	0	0	0.0344828	0	0	0.0689655	0.896552	0	0	0	0
hsa-miR-200c-3p	TAATACTGCCGGGTAATGATGGA	TAATACTGCCGGGTAATGATGGA	28	0	0	0	3	25	0	0	0	0	0	0	0	0.107143	0.892857	0	0	0	0
hsa-let-7i-3p	CTGCGCAAGCTACTGCCTTGCT	CTGCGCAAGCTACTGCCTTGCT	9	0	0	1	0	8	0	0	0	0	0	0	0.111111	0	0.888889	0	0	0	0
hsa-miR-182-5p	TTTGGCAATGGTAGAACTCACACT	TTTGGCAATGGTAGAACTCACACT	71	0	1	1	3	63	3	0	0	0	0	0.0140845	0.0140845	0.0422535	0.887324	0.0422535	0	0	0
hsa-miR-126-3p	TCGTACCGTGAGTAATAATGCG	TCGTACCGTGAGTAATAATGCG	26	0	0	0	3	23	0	0	0	0	0	0	0	0.115385	0.884615	0	0	0	0
hsa-miR-185-5p	TGGAGAGAAAGGCAGTTCCTGA	TGGAGAGAAAGGCAGTTCCTGA	34	0	0	0	4	30	0	0	0	0	0	0	0	0.117647	0.882353	0	0	0	0
hsa-miR-194-5p	TGTAACAGCAACTCCATGTGGA	TGTAACAGCAACTCCATGTGGA	34	0	0	0	4	30	0	0	0	0	0	0	0	0.117647	0.882353	0	0	0	0
hsa-miR-30c-2-3p	CTGGGAGAAGGCTGTTTACTCT	CTGGGAGAAGGCTGTTTACTCT	17	0	0	2	0	15	0	0	0	0	0	0	0.117647	0	0.882353	0	0	0	0
hsa-miR-203a-3p	GTGAAATGTTTAGGACCACTAG	GTGAAATGTTTAGGACCACTAG	25	0	0	1	2	22	0	0	0	0	0	0	0.04	0.08	0.88	0	0	0	0
hsa-let-7i-5p	TGAGGTAGTAGTTTGTGCTGTT	TGAGGTAGTAGTTTGTGCTGTT	74	0	3	2	4	65	0	0	0	0	0	0.0405405	0.027027	0.0540541	0.878378	0	0	0	0
hsa-miR-100-5p	AACCCGTAGATCCGAACTTGTG	AACCCGTAGATCCGAACTTGTG	40	0	0	0	5	35	0	0	0	0	0	0	0	0.125	0.875	0	0	0	0
hsa-miR-125b-2-3p	TCACAAGTCAGGCTCTTGGGAC	TCACAAGTCAGGCTCTTGGGAC	24	0	0	1	2	21	0	0	0	0	0	0	0.0416667	0.0833333	0.875	0	0	0	0
hsa-miR-1269a	CTGGACTGAGCCGTGCTACTGG	CTGGACTGAGCCGTGCTACTGG	16	1	0	1	0	14	0	0	0	0	0.0625	0	0.0625	0	0.875	0	0	0	0
hsa-miR-574-5p	TGAGTGTGTGTGTGTGAGTGTGT	TGAGTGTGTGTGTGTGAGTGTGT	31	1	0	0	0	27	3	0	0	0	0.0322581	0	0	0	0.870968	0.0967742	0	0	0
hsa-miR-93-5p	CAAAGTGCTGTTCGTGCAGGTAG	CAAAGTGCTGTTCGTGCAGGTAG	77	0	0	5	5	67	0	0	0	0	0	0	0.0649351	0.0649351	0.87013	0	0	0	0
hsa-miR-34c-5p	AGGCAGTGTAGTTAGCTGATTGC	AGGCAGTGTAGTTAGCTGATTGC	15	0	1	0	1	13	0	0	0	0	0	0.0666667	0	0.0666667	0.866667	0	0	0	0
hsa-miR-18a-5p	TAAGGTGCATCTAGTGCAGATAG	TAAGGTGCATCTAGTGCAGATAG	44	0	1	2	3	38	0	0	0	0	0	0.0227273	0.0454545	0.0681818	0.863636	0	0	0	0
hsa-miR-196b-5p	TAGGTAGTTTCCTGTTGTTGGG	TAGGTAGTTTCCTGTTGTTGGG	43	0	0	0	1	37	4	0	1	0	0	0	0	0.0232558	0.860465	0.0930233	0	0.0232558	0
hsa-miR-139-5p	TCTACAGTGCACGTGTCTCCAGT	TCTACAGTGCACGTGTCTCCAGT	7	0	1	0	0	6	0	0	0	0	0	0.142857	0	0	0.857143	0	0	0	0
hsa-miR-411-5p	TAGTAGACCGTATAGCGTACG	TAGTAGACCGTATAGCGTACG	7	0	1	0	0	6	0	0	0	0	0	0.142857	0	0	0.857143	0	0	0	0
hsa-miR-590-3p	TAATTTTATGTATAAGCTAGT	TAATTTTATGTATAAGCTAGT	20	0	0	0	2	17	1	0	0	0	0	0	0	0.1	0.85	0.05	0	0	0
hsa-miR-142-3p	TGTAGTGTTTCCTACTTTATGGA	TGTAGTGTTTCCTACTTTATGGA	26	0	0	0	4	22	0	0	0	0	0	0	0	0.153846	0.846154	0	0	0	0
hsa-miR-96-5p	TTTGGCACTAGCACATTTTTGCT	TTTGGCACTAGCACATTTTTGCT	26	0	0	1	3	22	0	0	0	0	0	0	0.0384615	0.115385	0.846154	0	0	0	0
hsa-miR-335-3p	TTTTTCATTATTGCTCCTGACC	TTTTTCATTATTGCTCCTGACC	38	0	1	0	5	32	0	0	0	0	0	0.0263158	0	0.131579	0.842105	0	0	0	0
hsa-miR-29b-3p	TAGCACCATTTGAAATCAGTGTT	TAGCACCATTTGAAATCAGTGTT	37	0	4	0	2	31	0	0	0	0	0	0.108108	0	0.0540541	0.837838	0	0	0	0
hsa-miR-1292-5p	TGGGAACGGGTTCCGGCAGACGCTG	TGGGAACGGGTTCCGGCAGACGCTG	6	0	0	0	1	5	0	0	0	0	0	0	0	0.166667	0.833333	0	0	0	0
hsa-miR-135b-5p	TATGGCTTTTCATTCCTATGTGA	TATGGCTTTTCATTCCTATGTGA	12	0	0	0	2	10	0	0	0	0	0	0	0	0.166667	0.833333	0	0	0	0
hsa-miR-141-5p	CATCTTCCAGTACAGTGTTGGA	CATCTTCCAGTACAGTGTTGGA	18	0	0	2	1	15	0	0	0	0	0	0	0.111111	0.0555556	0.833333	0	0	0	0
hsa-miR-200b-5p	CATCTTACTGGGCAGCATTGGA	CATCTTACTGGGCAGCATTGGA	12	0	0	0	2	10	0	0	0	0	0	0	0	0.166667	0.833333	0	0	0	0
hsa-miR-3158-3p	AAGGGCTTCCTCTCTGCAGGAC	AAGGGCTTCCTCTCTGCAGGAC	6	0	0	0	1	5	0	0	0	0	0	0	0	0.166667	0.833333	0	0	0	0
hsa-miR-424-3p	CAAAACGTGAGGCGCTGCTAT	CAAAACGTGAGGCGCTGCTAT	18	0	0	1	0	15	2	0	0	0	0	0	0.0555556	0	0.833333	0.111111	0	0	0
hsa-miR-1246	AATGGATTTTTGGAGCAGG	AATGGATTTTTGGAGCAGG	17	0	0	1	0	14	2	0	0	0	0	0	0.0588235	0	0.823529	0.117647	0	0	0
hsa-miR-125b-1-3p	ACGGGTTAGGCTCTTGGGAGCT	ACGGGTTAGGCTCTTGGGAGCT	17	0	0	1	2	14	0	0	0	0	0	0	0.0588235	0.117647	0.823529	0	0	0	0
hsa-miR-1307-5p	TCGACCGGACCTCGACCGGCT	TCGACCGGACCTCGACCGGCT	68	0	0	0	2	56	5	5	0	0	0	0	0	0.0294118	0.823529	0.0735294	0.0735294	0	0
hsa-miR-3613-5p	TGTTGTACTTTTTTTTTTGTTC	TGTTGTACTTTTTTTTTTGTTC	17	0	1	0	2	14	0	0	0	0	0	0.0588235	0	0.117647	0.823529	0	0	0	0
hsa-miR-9-5p	TCTTTGGTTATCTAGCTGTATGA	TCTTTGGTTATCTAGCTGTATGA	51	1	0	2	6	42	0	0	0	0	0.0196078	0	0.0392157	0.117647	0.823529	0	0	0	0
hsa-miR-192-5p	CTGACCTATGAATTGACAGCC	CTGACCTATGAATTGACAGCC	73	0	0	1	4	60	8	0	0	0	0	0	0.0136986	0.0547945	0.821918	0.109589	0	0	0
hsa-miR-21-3p	CAACACCAGTCGATGGGCTGT	CAACACCAGTCGATGGGCTGT	67	0	0	0	0	55	12	0	0	0	0	0	0	0	0.820896	0.179104	0	0	0
hsa-miR-132-3p	TAACAGTCTACAGCCATGGTCG	TAACAGTCTACAGCCATGGTCG	22	1	0	0	3	18	0	0	0	0	0.0454545	0	0	0.136364	0.818182	0	0	0	0
hsa-miR-151b	TCGAGGAGCTCACAGTCT	TCGAGGAGCTCACAGTCT	11	0	0	0	0	9	2	0	0	0	0	0	0	0	0.818182	0.181818	0	0	0
hsa-miR-454-5p	ACCCTATCAATATTGTCTCTGC	ACCCTATCAATATTGTCTCTGC	11	0	0	0	0	9	2	0	0	0	0	0	0	0	0.818182	0.181818	0	0	0
hsa-miR-769-5p	TGAGACCTCTGGGTTCTGAGCT	TGAGACCTCTGGGTTCTGAGCT	66	0	0	4	8	54	0	0	0	0	0	0	0.0606061	0.121212	0.818182	0	0	0	0
hsa-miR-140-5p	CAGTGGTTTTACCCTATGGTAG	CAGTGGTTTTACCCTATGGTAG	21	0	0	1	3	17	0	0	0	0	0	0	0.047619	0.142857	0.809524	0	0	0	0
hsa-miR-542-3p	TGTGACAGATTGATAACTGAAA	TGTGACAGATTGATAACTGAAA	31	0	1	2	3	25	0	0	0	0	0	0.0322581	0.0645161	0.0967742	0.806452	0	0	0	0
hsa-miR-27b-5p	AGAGCTTAGCTGATTGGTGAAC	AGAGCTTAGCTGATTGGTGAAC	36	0	1	2	2	29	2	0	0	0	0	0.0277778	0.0555556	0.0555556	0.805556	0.0555556	0	0	0
hsa-miR-105-5p	TCAAATGCTCAGACTCCTGTGGT	TCAAATGCTCAGACTCCTGTGGT	5	0	0	0	1	4	0	0	0	0	0	0	0	0.2	0.8	0	0	0	0
hsa-miR-127-3p	TCGGATCCGTCTGAGCTTGGCT	TCGGATCCGTCTGAGCTTGGCT	10	0	0	1	1	8	0	0	0	0	0	0	0.1	0.1	0.8	0	0	0	0
hsa-miR-136-3p	CATCATCGTCTCAAATGAGTCT	CATCATCGTCTCAAATGAGTCT	5	0	0	1	0	4	0	0	0	0	0	0	0.2	0	0.8	0	0	0	0
hsa-miR-150-5p	TCTCCCAACCCTTGTACCAGTG	TCTCCCAACCCTTGTACCAGTG	5	0	1	0	0	4	0	0	0	0	0	0.2	0	0	0.8	0	0	0	0
hsa-miR-181b-3p	CTCACTGAACAATGAATGCAA	CTCACTGAACAATGAATGCAA	10	0	0	0	1	8	1	0	0	0	0	0	0	0.1	0.8	0.1	0	0	0
hsa-miR-205-5p	TCCTTCATTCCACCGGAGTCTG	TCCTTCATTCCACCGGAGTCTG	15	0	1	0	1	12	1	0	0	0	0	0.0666667	0	0.0666667	0.8	0.0666667	0	0	0
hsa-miR-29a-3p	TAGCACCATCTGAAATCGGTTA	TAGCACCATCTGAAATCGGTTA	75	0	1	5	9	60	0	0	0	0	0	0.0133333	0.0666667	0.12	0.8	0	0	0	0
hsa-miR-577	TAGATAAAATATTGGTACCTG	TAGATAAAATATTGGTACCTG	10	0	0	0	0	8	2	0	0	0	0	0	0	0	0.8	0.2	0	0	0
hsa-miR-138-5p	AGCTGGTGTTGTGAATCAGGCCG	AGCTGGTGTTGTGAATCAGGCCG	29	0	0	4	1	23	1	0	0	0	0	0	0.137931	0.0344828	0.793103	0.0344828	0	0	0
hsa-miR-200c-5p	CGTCTTACCCAGCAGTGTTTGG	CGTCTTACCCAGCAGTGTTTGG	9	0	0	0	2	7	0	0	0	0	0	0	0	0.222222	0.777778	0	0	0	0
hsa-miR-501-3p	AATGCACCCGGGCAAGGATTCT	AATGCACCCGGGCAAGGATTCT	18	0	0	1	0	14	3	0	0	0	0	0	0.0555556	0	0.777778	0.166667	0	0	0
hsa-miR-331-3p	GCCCCTGGGCCTATCCTAGAA	GCCCCTGGGCCTATCCTAGAA	41	0	0	1	7	31	2	0	0	0	0	0	0.0243902	0.170732	0.756098	0.0487805	0	0	0
hsa-miR-181a-5p	AACATTCAACGCTGTCGGTGAGT	AACATTCAACGCTGTCGGTGAGT	80	0	1	1	8	60	2	8	0	0	0	0.0125	0.0125	0.1	0.75	0.025	0.1	0	0
hsa-miR-193a-3p	AACTGGCCTACAAAGTCCCAGT	AACTGGCCTACAAAGTCCCAGT	12	0	1	1	1	9	0	0	0	0	0	0.0833333	0.0833333	0.0833333	0.75	0	0	0	0
hsa-miR-199a-5p	CCCAGTGTTCAGACTACCTGTTC	CCCAGTGTTCAGACTACCTGTTC	8	2	0	0	0	6	0	0	0	0	0.25	0	0	0	0.75	0	0	0	0
hsa-miR-935	CCAGTTACCGCTTCCGCTACCGC	CCAGTTACCGCTTCCGCTACCGC	4	0	0	0	1	3	0	0	0	0	0	0	0	0.25	0.75	0	0	0	0
hsa-miR-92b-3p	TATTGCACTCGTCCCGGCCTCC	TATTGCACTCGTCCCGGCCTCC	74	1	1	14	3	55	0	0	0	0	0.0135135	0.0135135	0.189189	0.0405405	0.743243	0	0	0	0
hsa-miR-29c-3p	TAGCACCATTTGAAATCGGTTA	TAGCACCATTTGAAATCGGTTA	23	1	0	2	3	17	0	0	0	0	0.0434783	0	0.0869565	0.130435	0.73913	0	0	0	0
hsa-miR-598-3p	TACGTCATCGTTGTCATCGTCA	TACGTCATCGTTGTCATCGTCA	19	0	0	0	5	14	0	0	0	0	0	0	0	0.263158	0.736842	0	0	0	0
hsa-miR-125a-5p	TCCCTGAGACCCTTTAACCTGTGA	TCCCTGAGACCCTTTAACCTGTGA	67	2	0	0	16	49	0	0	0	0	0.0298507	0	0	0.238806	0.731343	0	0	0	0
hsa-miR-1285-3p	TCTGGGCAACAAAGTGAGACCT	TCTGGGCAACAAAGTGAGACCT	26	0	0	1	6	19	0	0	0	0	0	0	0.0384615	0.230769	0.730769	0	0	0	0
hsa-miR-142-5p	CATAAAGTAGAAAGCACTACT	CATAAAGTAGAAAGCACTACT	22	0	1	0	0	16	5	0	0	0	0	0.0454545	0	0	0.727273	0.227273	0	0	0
hsa-miR-1304-3p	TCTCACTGTAGCCTCGAACCCC	TCTCACTGTAGCCTCGAACCCC	7	0	0	2	0	5	0	0	0	0	0	0	0.285714	0	0.714286	0	0	0	0
hsa-miR-137	TTATTGCTTAAGAATACGCGTAG	TTATTGCTTAAGAATACGCGTAG	7	1	0	0	1	5	0	0	0	0	0.142857	0	0	0.142857	0.714286	0	0	0	0
hsa-let-7c-5p	TGAGGTAGTAGGTTGTATGGTT	TGAGGTAGTAGGTTGTATGGTT	66	16	0	0	3	47	0	0	0	0	0.242424	0	0	0.0454545	0.712121	0	0	0	0
hsa-miR-374a-5p	TTATAATACAACCTGATAAGTG	TTATAATACAACCTGATAAGTG	39	1	0	1	10	27	0	0	0	0	0.025641	0	0.025641	0.25641	0.692308	0	0	0	0
hsa-miR-455-3p	GCAGTCCATGGGCATATACAC	GCAGTCCATGGGCATATACAC	19	0	0	0	2	13	4	0	0	0	0	0	0	0.105263	0.684211	0.210526	0	0	0
hsa-miR-1-3p	TGGAATGTAAAGAAGTATGTAT	TGGAATGTAAAGAAGTATGTAT	3	0	0	1	0	2	0	0	0	0	0	0	0.333333	0	0.666667	0	0	0	0
hsa-miR-145-5p	GTCCAGTTTTCCCAGGAATCCCT	GTCCAGTTTTCCCAGGAATCCCT	3	0	0	1	0	2	0	0	0	0	0	0	0.333333	0	0.666667	0	0	0	0
hsa-miR-149-5p	TCTGGCTCCGTGTCTTCACTCCC	TCTGGCTCCGTGTCTTCACTCCC	39	0	2	2	9	26	0	0	0	0	0	0.0512821	0.0512821	0.230769	0.666667	0	0	0	0
hsa-miR-190a-5p	TGATATGTTTGATATATTAGGT	TGATATGTTTGATATATTAGGT	3	0	0	1	0	2	0	0	0	0	0	0	0.333333	0	0.666667	0	0	0	0
hsa-miR-193b-5p	CGGGGTTTTGAGGGCGAGATGA	CGGGGTTTTGAGGGCGAGATGA	6	0	0	0	2	4	0	0	0	0	0	0	0	0.333333	0.666667	0	0	0	0
hsa-miR-196a-3p	CGGCAACAAGAAACTGCCTGAG	CGGCAACAAGAAACTGCCTGAG	3	0	0	0	1	2	0	0	0	0	0	0	0	0.333333	0.666667	0	0	0	0
hsa-miR-19a-3p	TGTGCAAATCTATGCAAAACTGA	TGTGCAAATCTATGCAAAACTGA	51	0	0	0	17	34	0	0	0	0	0	0	0	0.333333	0.666667	0	0	0	0
hsa-miR-32-5p	TATTGCACATTACTAAGTTGCA	TATTGCACATTACTAAGTTGCA	21	1	0	2	4	14	0	0	0	0	0.047619	0	0.0952381	0.190476	0.666667	0	0	0	0
hsa-miR-365b-5p	AGGGACTTTCAGGGGCAGCTGT	AGGGACTTTCAGGGGCAGCTGT	3	0	0	0	0	2	1	0	0	0	0	0	0	0	0.666667	0.333333	0	0	0
hsa-miR-376c-3p	AACATAGAGGAAATTCCACGT	AACATAGAGGAAATTCCACGT	3	0	0	1	0	2	0	0	0	0	0	0	0.333333	0	0.666667	0	0	0	0
hsa-miR-379-5p	TGGTAGACTATGGAACGTAGG	TGGTAGACTATGGAACGTAGG	3	0	1	0	0	2	0	0	0	0	0	0.333333	0	0	0.666667	0	0	0	0
hsa-miR-429	TAATACTGTCTGGTAAAACCGT	TAATACTGTCTGGTAAAACCGT	24	0	0	1	7	16	0	0	0	0	0	0	0.0416667	0.291667	0.666667	0	0	0	0
hsa-miR-432-5p	TCTTGGAGTAGGTCATTGGGTGG	TCTTGGAGTAGGTCATTGGGTGG	6	0	0	2	0	4	0	0	0	0	0	0	0.333333	0	0.666667	0	0	0	0
hsa-miR-5010-3p	TTTTGTGTCTCCCATTCCCCAG	TTTTGTGTCTCCCATTCCCCAG	3	0	0	0	0	2	1	0	0	0	0	0	0	0	0.666667	0.333333	0	0	0
hsa-miR-548e-3p	AAAAACTGAGACTACTTTTGCA	AAAAACTGAGACTACTTTTGCA	3	0	0	0	1	2	0	0	0	0	0	0	0	0.333333	0.666667	0	0	0	0
hsa-miR-548h-5p	AAAAGTAATCGCGGTTTTTGTC	AAAAGTAATCGCGGTTTTTGTC	3	1	0	0	0	2	0	0	0	0	0.333333	0	0	0	0.666667	0	0	0	0
hsa-miR-766-5p	AGGAGGAATTGGTGCTGGTCTT	AGGAGGAATTGGTGCTGGTCTT	3	0	0	0	0	2	1	0	0	0	0	0	0	0	0.666667	0.333333	0	0	0
hsa-miR-130b-3p	CAGTGCAATGATGAAAGGGCAT	CAGTGCAATGATGAAAGGGCAT	70	0	0	4	20	46	0	0	0	0	0	0	0.0571429	0.285714	0.657143	0	0	0	0
hsa-miR-99a-5p	AACCCGTAGATCCGATCTTGTG	AACCCGTAGATCCGATCTTGTG	29	0	0	4	6	19	0	0	0	0	0	0	0.137931	0.206897	0.655172	0	0	0	0
hsa-miR-148a-3p	TCAGTGCACTACAGAACTTTGT	TCAGTGCACTACAGAACTTTGT	74	0	0	1	3	48	22	0	0	0	0	0	0.0135135	0.0405405	0.648649	0.297297	0	0	0
hsa-miR-320c	AAAAGCTGGGTTGAGAGGGT	AAAAGCTGGGTTGAGAGGGT	14	0	0	5	0	9	0	0	0	0	0	0	0.357143	0	0.642857	0	0	0	0
hsa-miR-660-5p	TACCCATTGCATATCGGAGTTG	TACCCATTGCATATCGGAGTTG	50	0	0	0	1	32	17	0	0	0	0	0	0	0.02	0.64	0.34	0	0	0
hsa-miR-767-5p	TGCACCATGGTTGTCTGAGCATG	TGCACCATGGTTGTCTGAGCATG	11	0	0	0	1	7	3	0	0	0	0	0	0	0.0909091	0.636364	0.272727	0	0	0
hsa-miR-34a-5p	TGGCAGTGTCTTAGCTGGTTGT	TGGCAGTGTCTTAGCTGGTTGT	49	0	0	1	0	31	17	0	0	0	0	0	0.0204082	0	0.632653	0.346939	0	0	0
hsa-miR-502-3p	AATGCACCTGGGCAAGGATTCA	AATGCACCTGGGCAAGGATTCA	8	0	0	1	2	5	0	0	0	0	0	0	0.125	0.25	0.625	0	0	0	0
hsa-miR-106b-5p	TAAAGTGCTGACAGTGCAGAT	TAAAGTGCTGACAGTGCAGAT	77	0	0	1	0	48	28	0	0	0	0	0	0.012987	0	0.623377	0.363636	0	0	0
hsa-miR-151a-5p	TCGAGGAGCTCACAGTCTAGT	TCGAGGAGCTCACAGTCTAGT	66	0	0	0	3	41	22	0	0	0	0	0	0	0.0454545	0.621212	0.333333	0	0	0
hsa-miR-193a-5p	TGGGTCTTTGCGGGCGAGATGA	TGGGTCTTTGCGGGCGAGATGA	13	0	0	3	2	8	0	0	0	0	0	0	0.230769	0.153846	0.615385	0	0	0	0
hsa-miR-196a-5p	TAGGTAGTTTCATGTTGTTGGG	TAGGTAGTTTCATGTTGTTGGG	39	0	0	0	3	24	12	0	0	0	0	0	0	0.0769231	0.615385	0.307692	0	0	0
hsa-miR-152-3p	TCAGTGCATGACAGAACTTGG	TCAGTGCATGACAGAACTTGG	36	0	1	0	3	22	9	1	0	0	0	0.0277778	0	0.0833333	0.611111	0.25	0.0277778	0	0
hsa-miR-99b-3p	CAAGCTCGTGTCTGTGGGTCCG	CAAGCTCGTGTCTGTGGGTCCG	18	0	0	5	2	11	0	0	0	0	0	0	0.277778	0.111111	0.611111	0	0	0	0
hsa-miR-19b-3p	TGTGCAAATCCATGCAAAACTGA	TGTGCAAATCCATGCAAAACTGA	74	0	0	2	27	45	0	0	0	0	0	0	0.027027	0.364865	0.608108	0	0	0	0
hsa-miR-16-2-3p	CCAATATTACTGTGCTGCTTTA	CCAATATTACTGTGCTGCTTTA	33	1	0	0	12	20	0	0	0	0	0.030303	0	0	0.363636	0.606061	0	0	0	0
hsa-miR-181c-3p	AACCATCGACCGTTGAGTGGAC	AACCATCGACCGTTGAGTGGAC	25	0	0	0	0	15	10	0	0	0	0	0	0	0	0.6	0.4	0	0	0
hsa-miR-205-3p	GATTTCAGTGGAGTGAAGTTC	GATTTCAGTGGAGTGAAGTTC	5	0	0	0	1	3	1	0	0	0	0	0	0	0.2	0.6	0.2	0	0	0
hsa-miR-338-3p	TCCAGCATCAGTGATTTTGTTG	TCCAGCATCAGTGATTTTGTTG	5	1	0	0	1	3	0	0	0	0	0.2	0	0	0.2	0.6	0	0	0	0
hsa-miR-576-5p	ATTCTAATTTCTCCACGTCTTT	ATTCTAATTTCTCCACGTCTTT	15	0	0	0	0	9	6	0	0	0	0	0	0	0	0.6	0.4	0	0	0
hsa-miR-944	AAATTATTGTACATCGGATGAG	AAATTATTGTACATCGGATGAG	5	0	0	0	2	3	0	0	0	0	0	0	0	0.4	0.6	0	0	0	0
hsa-miR-425-3p	ATCGGGAATGTCGTGTCCGCCC	ATCGGGAATGTCGTGTCCGCCC	27	0	2	0	7	16	2	0	0	0	0	0.0740741	0	0.259259	0.592593	0.0740741	0	0	0
hsa-miR-345-5p	GCTGACTCCTAGTCCAGGGCTC	GCTGACTCCTAGTCCAGGGCTC	62	1	1	0	24	36	0	0	0	0	0.016129	0.016129	0	0.387097	0.580645	0	0	0	0
hsa-miR-625-3p	GACTATAGAACTTTCCCCCTCA	GACTATAGAACTTTCCCCCTCA	19	0	0	0	0	11	8	0	0	0	0	0	0	0	0.578947	0.421053	0	0	0
hsa-miR-22-5p	AGTTCTTCAGTGGCAAGCTTTA	AGTTCTTCAGTGGCAAGCTTTA	7	0	1	0	2	4	0	0	0	0	0	0.142857	0	0.285714	0.571429	0	0	0	0
hsa-miR-628-5p	ATGCTGACATATTTACTAGAGG	ATGCTGACATATTTACTAGAGG	7	0	1	0	2	4	0	0	0	0	0	0.142857	0	0.285714	0.571429	0	0	0	0
hsa-miR-33a-5p	GTGCATTGTAGTTGCATTGCA	GTGCATTGTAGTTGCATTGCA	18	0	1	2	5	10	0	0	0	0	0	0.0555556	0.111111	0.277778	0.555556	0	0	0	0
hsa-miR-1275	GTGGGGGAGAGGCTGTC	GTGGGGGAGAGGCTGTC	24	0	0	0	11	13	0	0	0	0	0	0	0	0.458333	0.541667	0	0	0	0
hsa-miR-708-5p	AAGGAGCTTACAATCTAGCTGGG	AAGGAGCTTACAATCTAGCTGGG	13	0	0	0	6	7	0	0	0	0	0	0	0	0.461538	0.538462	0	0	0	0
hsa-miR-183-5p	TATGGCACTGGTAGAATTCACT	TATGGCACTGGTAGAATTCACT	67	0	1	0	1	36	29	0	0	0	0	0.0149254	0	0.0149254	0.537313	0.432836	0	0	0
hsa-miR-23a-3p	ATCACATTGCCAGGGATTTCC	ATCACATTGCCAGGGATTTCC	67	0	0	3	0	35	28	1	0	0	0	0	0.0447761	0	0.522388	0.41791	0.0149254	0	0
hsa-miR-27b-3p	TTCACAGTGGCTAAGTTCTGC	TTCACAGTGGCTAAGTTCTGC	81	0	5	1	32	41	2	0	0	0	0	0.0617284	0.0123457	0.395062	0.506173	0.0246914	0	0	0
hsa-miR-122-5p	TGGAGTGTGACAATGGTGTTTG	TGGAGTGTGACAATGGTGTTTG	2	0	1	0	0	1	0	0	0	0	0	0.5	0	0	0.5	0	0	0	0
hsa-miR-127-5p	CTGAAGCTCAGAGGGCTCTGAT	CTGAAGCTCAGAGGGCTCTGAT	2	0	0	1	0	1	0	0	0	0	0	0	0.5	0	0.5	0	0	0	0
hsa-miR-1323	TCAAAACTGAGGGGCATTTTCT	TCAAAACTGAGGGGCATTTTCT	2	0	0	1	0	1	0	0	0	0	0	0	0.5	0	0.5	0	0	0	0
hsa-miR-136-5p	ACTCCATTTGTTTTGATGATGGA	ACTCCATTTGTTTTGATGATGGA	2	0	0	0	1	1	0	0	0	0	0	0	0	0.5	0.5	0	0	0	0
hsa-miR-145-3p	GGATTCCTGGAAATACTGTTCT	GGATTCCTGGAAATACTGTTCT	2	0	0	1	0	1	0	0	0	0	0	0	0.5	0	0.5	0	0	0	0
hsa-miR-153-3p	TTGCATAGTCACAAAAGTGATC	TTGCATAGTCACAAAAGTGATC	2	0	1	0	0	1	0	0	0	0	0	0.5	0	0	0.5	0	0	0	0
hsa-miR-20b-5p	CAAAGTGCTCATAGTGCAGGTAG	CAAAGTGCTCATAGTGCAGGTAG	2	0	0	1	0	1	0	0	0	0	0	0	0.5	0	0.5	0	0	0	0
hsa-miR-324-3p	ACTGCCCCAGGTGCTGCTGG	ACTGCCCCAGGTGCTGCTGG	6	0	0	0	3	3	0	0	0	0	0	0	0	0.5	0.5	0	0	0	0
hsa-miR-324-5p	CGCATCCCCTAGGGCATTGGTGT	CGCATCCCCTAGGGCATTGGTGT	6	1	0	0	2	3	0	0	0	0	0.166667	0	0	0.333333	0.5	0	0	0	0
hsa-miR-34b-5p	TAGGCAGTGTCATTAGCTGATTG	TAGGCAGTGTCATTAGCTGATTG	2	0	1	0	0	1	0	0	0	0	0	0.5	0	0	0.5	0	0	0	0
hsa-miR-365a-5p	AGGGACTTTTGGGGGCAGATGTG	AGGGACTTTTGGGGGCAGATGTG	4	0	0	0	2	2	0	0	0	0	0	0	0	0.5	0.5	0	0	0	0
hsa-miR-369-3p	AATAATACATGGTTGATCTTT	AATAATACATGGTTGATCTTT	2	0	1	0	0	1	0	0	0	0	0	0.5	0	0	0.5	0	0	0	0
hsa-miR-374b-5p	ATATAATACAACCTGCTAAGTG	ATATAATACAACCTGCTAAGTG	46	1	0	1	21	23	0	0	0	0	0.0217391	0	0.0217391	0.456522	0.5	0	0	0	0
hsa-miR-449a	TGGCAGTGTATTGTTAGCTGGT	TGGCAGTGTATTGTTAGCTGGT	4	0	1	1	0	2	0	0	0	0	0	0.25	0.25	0	0.5	0	0	0	0
hsa-miR-490-3p	CAACCTGGAGGACTCCATGCTG	CAACCTGGAGGACTCCATGCTG	2	0	0	0	0	1	1	0	0	0	0	0	0	0	0.5	0.5	0	0	0
hsa-miR-495-3p	AAACAAACATGGTGCACTTCTT	AAACAAACATGGTGCACTTCTT	2	0	1	0	0	1	0	0	0	0	0	0.5	0	0	0.5	0	0	0	0
hsa-miR-516b-5p	ATCTGGAGGTAAGAAGCACTTT	ATCTGGAGGTAAGAAGCACTTT	2	0	0	1	0	1	0	0	0	0	0	0	0.5	0	0.5	0	0	0	0
hsa-miR-550a-5p	AGTGCCTGAGGGAGTAAGAGCCC	AGTGCCTGAGGGAGTAAGAGCCC	6	0	0	0	3	3	0	0	0	0	0	0	0	0.5	0.5	0	0	0	0
hsa-miR-873-5p	GCAGGAACTTGTGAGTCTCCT	GCAGGAACTTGTGAGTCTCCT	2	0	0	1	0	1	0	0	0	0	0	0	0.5	0	0.5	0	0	0	0
hsa-miR-24-3p	TGGCTCAGTTCAGCAGGAACAG	TGGCTCAGTTCAGCAGGAACAG	71	0	0	33	3	35	0	0	0	0	0	0	0.464789	0.0422535	0.492958	0	0	0	0
hsa-miR-130a-3p	CAGTGCAATGTTAAAAGGGCAT	CAGTGCAATGTTAAAAGGGCAT	51	0	0	19	2	25	5	0	0	0	0	0	0.372549	0.0392157	0.490196	0.0980392	0	0	0
hsa-miR-744-5p	TGCGGGGCTAGGGCTAACAGCA	TGCGGGGCTAGGGCTAACAGCA	72	0	0	3	34	35	0	0	0	0	0	0	0.0416667	0.472222	0.486111	0	0	0	0
hsa-miR-221-3p	AGCTACATTGTCTGCTGGGTTTC	AGCTACATTGTCTGCTGGGTTTC	79	1	1	1	37	37	2	0	0	0	0.0126582	0.0126582	0.0126582	0.468354	0.468354	0.0253165	0	0	0
hsa-miR-7706	TGAAGCGCCTGTGCTCTGCCGAGA	TGAAGCGCCTGTGCTCTGCCGAGA	36	0	0	9	11	16	0	0	0	0	0	0	0.25	0.305556	0.444444	0	0	0	0
hsa-miR-641	AAAGACATAGGATAGAGTCACCTC	AAAGACATAGGATAGAGTCACCTCT	16	0	0	0	0	7	9	0	0	0	0	0	0	0	0.4375	0.5625	0	0	0
hsa-miR-143-3p	TGAGATGAAGCACTGTAGCTC	TGAGATGAAGCACTGTAGCT	37	0	1	2	18	16	0	0	0	0	0	0.027027	0.0540541	0.486486	0.432432	0	0	0	0
hsa-miR-195-5p	TAGCAGCACAGAAATATTGGC	TAGCAGCACAGAAATATTGGCA	7	0	0	0	0	3	4	0	0	0	0	0	0	0	0.428571	0.571429	0	0	0
hsa-miR-503-5p	TAGCAGCGGGAACAGTTCTGCAG	TAGCAGCGGGAACAGTTCTGCAG	19	1	7	0	3	8	0	0	0	0	0.0526316	0.368421	0	0.157895	0.421053	0	0	0	0
hsa-miR-218-5p	TTGTGCTTGATCTAACCATGT	TTGTGCTTGATCTAACCATGTG	10	0	0	0	0	4	6	0	0	0	0	0	0	0	0.4	0.6	0	0	0
hsa-miR-339-5p	TCCCTGTCCTCCAGGAGCTCACG	TCCCTGTCCTCCAGGAGCTC	33	0	15	3	2	13	0	0	0	0	0	0.454545	0.0909091	0.0606061	0.393939	0	0	0	0
hsa-miR-652-3p	AATGGCGCCACTAGGGTTGTG	AATGGCGCCACTAGGGTTGTG	28	0	0	7	3	11	6	1	0	0	0	0	0.25	0.107143	0.392857	0.214286	0.0357143	0	0
hsa-miR-23b-3p	ATCACATTGCCAGGGATTACC	ATCACATTGCCAGGGATTACCAC	69	0	5	0	0	27	9	28	0	0	0	0.0724638	0	0	0.391304	0.130435	0.405797	0	0
hsa-miR-15a-5p	TAGCAGCACATAATGGTTTGTG	TAGCAGCACATAATGGTTTGTG	58	0	1	0	22	22	3	10	0	0	0	0.0172414	0	0.37931	0.37931	0.0517241	0.172414	0	0
hsa-miR-181b-5p	AACATTCATTGCTGTCGGTGGGT	AACATTCATTGCTGTCGGTGGGTT	77	0	2	5	4	29	37	0	0	0	0	0.025974	0.0649351	0.0519481	0.376623	0.480519	0	0	0
hsa-miR-296-3p	GAGGGTTGGGTGGAGGCTCTCC	GAGGGTTGGGTGGAGGCTCTCC	8	2	2	1	0	3	0	0	0	0	0.25	0.25	0.125	0	0.375	0	0	0	0
hsa-miR-450a-5p	TTTTGCGATGTGTTCCTAATAT	TTTTGCGATGTGTTCCTAAT	19	1	0	9	2	7	0	0	0	0	0.0526316	0	0.473684	0.105263	0.368421	0	0	0	0
hsa-miR-27a-3p	TTCACAGTGGCTAAGTTCCGC	TTCACAGTGGCTAAGTTCCG	71	3	0	1	43	24	0	0	0	0	0.0422535	0	0.0140845	0.605634	0.338028	0	0	0	0
hsa-miR-183-3p	GTGAATTACCGAAGGGCCATAA	GTGAATTACCGAAGGGCCAT	3	0	0	2	0	1	0	0	0	0	0	0	0.666667	0	0.333333	0	0	0	0
hsa-miR-186-5p	CAAAGAATTCTCCTTTTGGGCT	CAAAGAATTCTCCTTTTGGGCTT	75	0	0	1	0	25	49	0	0	0	0	0	0.0133333	0	0.333333	0.653333	0	0	0
hsa-miR-4446-3p	CAGGGCTGGCAGTGACATGGGT	CAGGGCTGGCAGTGACATGGG	3	0	0	0	2	1	0	0	0	0	0	0	0	0.666667	0.333333	0	0	0	0
hsa-miR-489-3p	GTGACATCACATATACGGCAGC	GTGACATCACATATACGGCAG	3	0	0	0	2	1	0	0	0	0	0	0	0	0.666667	0.333333	0	0	0	0
hsa-miR-95-3p	TTCAACGGGTATTTATTGAGCA	TTCAACGGGTATTTATTGAG	6	1	0	3	0	2	0	0	0	0	0.166667	0	0.5	0	0.333333	0	0	0	0
hsa-miR-151a-3p	CTAGACTGAAGCTCCTTGAGG	CTAGACTGAAGCTCCTTGAGGA	70	0	1	0	3	22	44	0	0	0	0	0.0142857	0	0.0428571	0.314286	0.628571	0	0	0
hsa-miR-1301-3p	TTGCAGCTGCCTGGGAGTGACTTC	TTGCAGCTGCCTGGGAGTGACT	13	0	1	7	1	4	0	0	0	0	0	0.0769231	0.538462	0.0769231	0.307692	0	0	0	0
hsa-miR-25-5p	AGGCGGAGACTTGGGCAATTG	AGGCGGAGACTTGGGCAATTGCT	30	0	0	0	1	9	2	18	0	0	0	0	0	0.0333333	0.3	0.0666667	0.6	0	0
hsa-miR-33b-5p	GTGCATTGCTGTTGCATTGC	GTGCATTGCTGTTGCATTGC	10	0	0	2	3	3	2	0	0	0	0	0	0.2	0.3	0.3	0.2	0	0	0
hsa-miR-499a-5p	TTAAGACTTGCAGTGATGTTT	TTAAGACTTGCAGTGATGTTTA	7	0	1	0	0	2	4	0	0	0	0	0.142857	0	0	0.285714	0.571429	0	0	0
hsa-miR-17-3p	ACTGCAGTGAAGGCACTTGTAG	ACTGCAGTGAAGGCACTTGTA	50	0	0	4	23	14	8	1	0	0	0	0	0.08	0.46	0.28	0.16	0.02	0	0
hsa-miR-424-5p	CAGCAGCAATTCATGTTTTGAA	CAGCAGCAATTCATGTTTTGA	29	0	0	4	17	8	0	0	0	0	0	0	0.137931	0.586207	0.275862	0	0	0	0
hsa-miR-199a-3p	ACAGTAGTCTGCACATTGGTTA	ACAGTAGTCTGCACATTGGTT	15	1	0	0	10	4	0	0	0	0	0.0666667	0	0	0.666667	0.266667	0	0	0	0
hsa-miR-93-3p	ACTGCTGAGCTAGCACTTCCCG	ACTGCTGAGCTAGCACTTCCCGA	15	0	0	0	0	4	11	0	0	0	0	0	0	0	0.266667	0.733333	0	0	0
hsa-miR-181d-5p	AACATTCATTGTTGTCGGTGGGT	AACATTCATTGTTGTCGGTGGGTT	40	0	0	0	0	10	30	0	0	0	0	0	0	0	0.25	0.75	0	0	0
hsa-miR-505-3p	CGTCAACACTTGCTGGTTTCCT	CGTCAACACTTGCTGGTTTCCTCT	8	0	0	0	0	2	0	6	0	0	0	0	0	0	0.25	0	0.75	0	0
hsa-miR-339-3p	TGAGCGCCTCGACGACAGAGCCG	TGAGCGCCTCGACGACAGAGCC	33	1	0	9	15	8	0	0	0	0	0.030303	0	0.272727	0.454545	0.242424	0	0	0	0
hsa-miR-4454	GGATCCGAGTCACGGCACCA	GGATCCGAGTCACGGC	43	31	0	2	0	10	0	0	0	0	0.72093	0	0.0465116	0	0.232558	0	0	0	0
hsa-miR-1269b	CTGGACTGAGCCATGCTACTGG	CTGGACTGAGCCATGCTACT	18	0	0	14	0	4	0	0	0	0	0	0	0.777778	0	0.222222	0	0	0	0
hsa-miR-155-5p	TTAATGCTAATCGTGATAGGGGT	TTAATGCTAATCGTGATAGGGGTT	28	0	0	2	0	6	20	0	0	0	0	0	0.0714286	0	0.214286	0.714286	0	0	0
hsa-miR-215-5p	ATGACCTATGAATTGACAGAC	ATGACCTATGAATTGACAGACA	14	0	0	1	0	3	10	0	0	0	0	0	0.0714286	0	0.214286	0.714286	0	0	0
hsa-miR-1247-3p	CCCCGGGAACGTCGAGACTGGAGC	CCCCGGGAACGTCGAGACTG	10	5	2	0	1	2	0	0	0	0	0.5	0.2	0	0.1	0.2	0	0	0	0
hsa-miR-199b-5p	CCCAGTGTTTAGACTATCTGTTC	CCCAGTGTTTAGACTATCTGTT	5	2	0	0	2	1	0	0	0	0	0.4	0	0	0.4	0.2	0	0	0	0
hsa-miR-148b-5p	AAGTTCTGTTATACACTCAGGC	AAGTTCTGTTATACACTCAGGCT	38	0	0	0	1	7	30	0	0	0	0	0	0	0.0263158	0.184211	0.789474	0	0	0
hsa-miR-342-3p	TCTCACACAGAAATCGCACCCGT	TCTCACACAGAAATCGCACCCGTC	47	0	0	1	0	8	36	2	0	0	0	0	0.0212766	0	0.170213	0.765957	0.0425532	0	0
hsa-miR-191-3p	GCTGCGCTTGGATTTCGTCCCC	GCTGCGCTTGGATTTCGTCCC	12	0	0	0	10	2	0	0	0	0	0	0	0	0.833333	0.166667	0	0	0	0
hsa-miR-204-5p	TTCCCTTTGTCATCCTATGCCT	TTCCCTTTGTCATCCTATGCCTG	12	0	0	1	0	2	9	0	0	0	0	0	0.0833333	0	0.166667	0.75	0	0	0
hsa-miR-335-5p	TCAAGAGCAATAACGAAAAATGT	TCAAGAGCAATAACGAAAAATG	12	1	0	0	9	2	0	0	0	0	0.0833333	0	0	0.75	0.166667	0	0	0	0
hsa-miR-363-3p	AATTGCACGGTATCCATCTGTA	AATTGCACGGTATCCATCTGT	6	0	1	0	4	1	0	0	0	0	0	0.166667	0	0.666667	0.166667	0	0	0	0
hsa-miR-671-5p	AGGAAGCCCTGGAGGGGCTGGAG	AGGAAGCCCTGGAGGGGCTGGAGG	18	0	0	0	0	3	15	0	0	0	0	0	0	0	0.166667	0.833333	0	0	0
hsa-miR-21-5p	TAGCTTATCAGACTGATGTTGA	TAGCTTATCAGACTGATGTTGAC	79	0	0	1	2	13	49	14	0	0	0	0	0.0126582	0.0253165	0.164557	0.620253	0.177215	0	0
hsa-miR-107	AGCAGCATTGTACAGGGCTATCA	AGCAGCATTGTACAGGGCTAT	75	0	0	34	29	12	0	0	0	0	0	0	0.453333	0.386667	0.16	0	0	0	0
hsa-miR-1307-3p	ACTCGGCGTGGCGTCGGTCGTG	ACTCGGCGTGGCGTCGGTCGTGG	71	0	0	0	0	11	58	0	2	0	0	0	0	0	0.15493	0.816901	0	0.028169	0
hsa-miR-18a-3p	ACTGCCCTAAGTGCTCCTTCTGG	ACTGCCCTAAGTGCTCCTTCTG	20	0	0	5	11	3	1	0	0	0	0	0	0.25	0.55	0.15	0.05	0	0	0
hsa-let-7a-3p	CTATACAATCTACTGTCTTTC	CTATACAATCTACTGTCTTTCC	34	0	0	0	2	5	27	0	0	0	0	0	0	0.0588235	0.147059	0.794118	0	0	0
hsa-miR-101-3p	TACAGTACTGTGATAACTGAA	TACAGTACTGTGATAACTGAAG	79	0	2	1	0	11	63	2	0	0	0	0.0253165	0.0126582	0	0.139241	0.797468	0.0253165	0	0
hsa-miR-454-3p	TAGTGCAATATTGCTTATAGGGT	TAGTGCAATATTGCTTATAGGGTT	53	0	0	1	1	7	31	13	0	0	0	0	0.0188679	0.0188679	0.132075	0.584906	0.245283	0	0
hsa-miR-221-5p	ACCTGGCATACAATGTAGATTT	ACCTGGCATACAATGTAGATTTCTG	31	0	0	0	0	4	2	12	13	0	0	0	0	0	0.129032	0.0645161	0.387097	0.419355	0
hsa-miR-31-3p	TGCTATGCCAACATATTGCCAT	TGCTATGCCAACATATTGCCATC	8	0	0	0	0	1	7	0	0	0	0	0	0	0	0.125	0.875	0	0	0
hsa-miR-30c-5p	TGTAAACATCCTACACTCTCAGC	TGTAAACATCCTACACTCTCAGCT	74	0	1	0	3	9	61	0	0	0	0	0.0135135	0	0.0405405	0.121622	0.824324	0	0	0
hsa-miR-320b	AAAAGCTGGGTTGAGAGGGCAA	AAAAGCTGGGTTGAGAGGGC	35	0	0	31	0	4	0	0	0	0	0	0	0.885714	0	0.114286	0	0	0	0
hsa-miR-200b-3p	TAATACTGCCTGGTAATGATGA	TAATACTGCCTGGTAATGATGAC	44	0	0	0	1	5	38	0	0	0	0	0	0	0.0227273	0.113636	0.863636	0	0	0
hsa-miR-10a-5p	TACCCTGTAGATCCGAATTTGTG	TACCCTGTAGATCCGAATTTGT	54	0	1	1	46	6	0	0	0	0	0	0.0185185	0.0185185	0.851852	0.111111	0	0	0	0
hsa-miR-141-3p	TAACACTGTCTGGTAAAGATGG	TAACACTGTCTGGTAAAGATG	27	1	0	0	15	3	8	0	0	0	0.037037	0	0	0.555556	0.111111	0.296296	0	0	0
hsa-miR-4473	CTAGTGCTCTCCGTTACAAGTA	CTAGTGCTCTCCGTTACAAGT	9	0	0	0	8	1	0	0	0	0	0	0	0	0.888889	0.111111	0	0	0	0
hsa-miR-500a-3p	ATGCACCTGGGCAAGGATTCTG	ATGCACCTGGGCAAGGATTCTGA	51	0	1	0	4	5	41	0	0	0	0	0.0196078	0	0.0784314	0.0980392	0.803922	0	0	0
hsa-miR-3200-3p	CACCTTGCGCTACTCAGGTCTG	CACCTTGCGCTACTCAGGTCTGC	11	0	0	0	0	1	10	0	0	0	0	0	0	0	0.0909091	0.909091	0	0	0
hsa-miR-24-2-5p	TGCCTACTGAGCTGAAACACAG	TGCCTACTGAGCTGAAACACAGT	23	0	0	0	0	2	21	0	0	0	0	0	0	0	0.0869565	0.913043	0	0	0
hsa-miR-7-5p	TGGAAGACTAGTGATTTTGTTGT	TGGAAGACTAGTGATTTTGTTGTT	47	0	0	1	0	4	42	0	0	0	0	0	0.0212766	0	0.0851064	0.893617	0	0	0
hsa-miR-340-3p	TCCGTCTCAGTTACTTTATAGC	TCCGTCTCAGTTACTTTATAGCC	12	0	0	0	0	1	11	0	0	0	0	0	0	0	0.0833333	0.916667	0	0	0
hsa-miR-425-5p	AATGACACGATCACTCCCGTTGA	AATGACACGATCACTCCCGTTGAGT	72	0	0	0	32	6	0	34	0	0	0	0	0	0.444444	0.0833333	0	0.472222	0	0
hsa-miR-629-5p	TGGGTTTACGTTGGGAGAACT	TGGGTTTACGTTGGGAGAACTT	24	5	0	0	0	2	17	0	0	0	0.208333	0	0	0	0.0833333	0.708333	0	0	0
hsa-miR-130b-5p	ACTCTTTCCCTGTTGCACTAC	ACTCTTTCCCTGTTGCACTACT	37	0	0	0	0	3	34	0	0	0	0	0	0	0	0.0810811	0.918919	0	0	0
hsa-miR-200a-3p	TAACACTGTCTGGTAACGATGT	TAACACTGTCTGGTAACGATGTT	28	1	0	0	1	2	24	0	0	0	0.0357143	0	0	0.0357143	0.0714286	0.857143	0	0	0
hsa-miR-15b-3p	CGAATCATTATTTGCTGCTCTA	CGAATCATTATTTGCTGCTCT	29	0	0	0	27	2	0	0	0	0	0	0	0	0.931034	0.0689655	0	0	0	0
hsa-miR-140-3p	TACCACAGGGTAGAACCACGG	TACCACAGGGTAGAACCACGGAC	76	0	0	0	0	5	18	50	3	0	0	0	0	0	0.0657895	0.236842	0.657895	0.0394737	0
hsa-miR-106b-3p	CCGCACTGTGGGTACTTGCTGC	CCGCACTGTGGGTACTTGCT	63	0	0	37	22	4	0	0	0	0	0	0	0.587302	0.349206	0.0634921	0	0	0	0
hsa-miR-30a-5p	TGTAAACATCCTCGACTGGAAG	TGTAAACATCCTCGACTGGAAGCT	56	0	1	0	0	3	11	41	0	0	0	0.0178571	0	0	0.0535714	0.196429	0.732143	0	0
hsa-miR-30e-5p	TGTAAACATCCTTGACTGGAAG	TGTAAACATCCTTGACTGGAAGCT	75	0	0	0	0	4	11	60	0	0	0	0	0	0	0.0533333	0.146667	0.8	0	0
hsa-miR-26b-5p	TTCAAGTAATTCAGGATAGGT	TTCAAGTAATTCAGGATAGGTT	79	0	0	1	0	3	75	0	0	0	0	0	0.0126582	0	0.0379747	0.949367	0	0	0
hsa-miR-30d-5p	TGTAAACATCCCCGACTGGAAG	TGTAAACATCCCCGACTGGAAGCT	79	0	1	0	0	3	11	64	0	0	0	0.0126582	0	0	0.0379747	0.139241	0.810127	0	0
hsa-miR-31-5p	AGGCAAGATGCTGGCATAGCT	AGGCAAGATGCTGGCATAGCTG	41	0	0	0	0	1	28	12	0	0	0	0	0	0	0.0243902	0.682927	0.292683	0	0
hsa-miR-10b-5p	TACCCTGTAGAACCGAATTTGTG	TACCCTGTAGAACCGAATTTGT	48	0	1	1	45	1	0	0	0	0	0	0.0208333	0.0208333	0.9375	0.0208333	0	0	0	0
hsa-miR-146b-5p	TGAGAACTGAATTCCATAGGCT	TGAGAACTGAATTCCATAGGCTGT	68	0	0	0	0	1	7	60	0	0	0	0	0	0	0.0147059	0.102941	0.882353	0	0
hsa-miR-222-3p	AGCTACATCTGGCTACTGGGT	AGCTACATCTGGCTACTGGGTCTC	74	0	0	0	1	1	2	10	55	5	0	0	0	0.0135135	0.0135135	0.027027	0.135135	0.743243	0.0675676
hsa-miR-1468-5p	CTCCGTTTGCCTGTTTCGCTG	CTCCGTTTGCCTGTTTCGCTGA	4	0	0	0	0	0	4	0	0	0	0	0	0	0	0	1	0	0	0
hsa-miR-146b-3p	TGCCCTGTGGACTCAGTTCTGG	TGCCCTGTGGACTCAGTTCTGGT	1	0	0	0	0	0	1	0	0	0	0	0	0	0	0	1	0	0	0
hsa-miR-188-5p	CATCCCTTGCATGGTGGAGGG	CATCCCTTGCATGGTGGAGGGT	1	0	0	0	0	0	1	0	0	0	0	0	0	0	0	1	0	0	0
hsa-miR-20a-3p	ACTGCATTATGAGCACTTAAAG	ACTGCATTATGAGCACTTAAAGT	2	0	0	0	0	0	2	0	0	0	0	0	0	0	0	1	0	0	0
hsa-miR-20b-3p	ACTGTAGTATGGGCACTTCCAG	ACTGTAGTATGGGCACTTCCAGT	1	0	0	0	0	0	1	0	0	0	0	0	0	0	0	1	0	0	0
hsa-miR-363-5p	CGGGTGGATCACGATGCAATTT	CGGGTGGATCACGATGCAATTTT	1	0	0	0	0	0	1	0	0	0	0	0	0	0	0	1	0	0	0
hsa-miR-376a-5p	GTAGATTCTCCTTCTATGAGTA	GTAGATTCTCCTTCTATGAGTAC	1	0	0	0	0	0	1	0	0	0	0	0	0	0	0	1	0	0	0
hsa-miR-4286	ACCCCACTCCTGGTACC	ACCCCACTCCTGGTACCA	22	0	0	0	0	0	22	0	0	0	0	0	0	0	0	1	0	0	0
hsa-miR-4425	TGTTGGGATTCAGCAGGACCAT	TGTTGGGATTCAGCAGGACCATT	1	0	0	0	0	0	1	0	0	0	0	0	0	0	0	1	0	0	0
hsa-miR-449b-5p	AGGCAGTGTATTGTTAGCTGGC	AGGCAGTGTATTGTTAGCTGGCT	1	0	0	0	0	0	1	0	0	0	0	0	0	0	0	1	0	0	0
hsa-miR-483-3p	TCACTCCTCTCCTCCCGTCTT	TCACTCCTCTCCTCCCGTCTTC	12	0	0	0	0	0	12	0	0	0	0	0	0	0	0	1	0	0	0
hsa-miR-505-5p	GGGAGCCAGGAAGTATTGATGT	GGGAGCCAGGAAGTATTGATGTT	1	0	0	0	0	0	1	0	0	0	0	0	0	0	0	1	0	0	0
hsa-miR-576-3p	AAGATGTGGAAAAATTGGAATC	AAGATGTGGAAAAATTGGAATCC	9	0	0	0	0	0	9	0	0	0	0	0	0	0	0	1	0	0	0
hsa-miR-625-5p	AGGGGGAAAGTTCTATAGTCC	AGGGGGAAAGTTCTATAGTCCT	11	0	0	0	0	0	11	0	0	0	0	0	0	0	0	1	0	0	0
hsa-miR-708-3p	CAACTAGACTGTGAGCTTCTAG	CAACTAGACTGTGAGCTTCTAGA	7	0	0	0	0	0	7	0	0	0	0	0	0	0	0	1	0	0	0
hsa-miR-760	CGGCTCTGGGTCTGTGGGGA	CGGCTCTGGGTCTGTGGGGAG	12	0	0	0	0	0	12	0	0	0	0	0	0	0	0	1	0	0	0
hsa-miR-874-3p	CTGCCCTGGCCCGAGGGACCGA	CTGCCCTGGCCCGAGGGACCGAC	6	0	0	0	0	0	6	0	0	0	0	0	0	0	0	1	0	0	0
hsa-miR-92a-2-5p	GGGTGGGGATTTGTTGCATTAC	GGGTGGGGATTTGTTGCATTACT	1	0	0	0	0	0	1	0	0	0	0	0	0	0	0	1	0	0	0
hsa-miR-99a-3p	CAAGCTCGCTTCTATGGGTCTG	CAAGCTCGCTTCTATGGGTCTGT	2	0	0	0	0	0	2	0	0	0	0	0	0	0	0	1	0	0	0
hsa-miR-181c-5p	AACATTCAACCTGTCGGTGAGT	AACATTCAACCTGTCGGTGAGTT	41	0	1	0	1	0	38	1	0	0	0	0.0243902	0	0.0243902	0	0.926829	0.0243902	0	0
hsa-miR-361-3p	TCCCCCAGGTGTGATTCTGATTT	TCCCCCAGGTGTGATTCTGATTTG	24	0	0	0	2	0	21	1	0	0	0	0	0	0.0833333	0	0.875	0.0416667	0	0
hsa-miR-223-3p	TGTCAGTTTGTCAAATACCCCA	TGTCAGTTTGTCAAATACCCCAA	4	0	0	0	1	0	3	0	0	0	0	0	0	0.25	0	0.75	0	0	0
hsa-miR-190b	TGATATGTTTGATATTGGGTT	TGATATGTTTGATATTGGGTTG	3	0	0	0	0	0	2	1	0	0	0	0	0	0	0	0.666667	0.333333	0	0
hsa-miR-29a-5p	ACTGATTTCTTTTGGTGTTCAG	ACTGATTTCTTTTGGTGTTCAGA	6	0	0	0	0	0	4	2	0	0	0	0	0	0	0	0.666667	0.333333	0	0
hsa-miR-497-5p	CAGCAGCACACTGTGGTTTGT	CAGCAGCACACTGTGGTTTGTA	3	0	0	1	0	0	2	0	0	0	0	0	0.333333	0	0	0.666667	0	0	0
hsa-miR-330-5p	TCTCTGGGCCTGTGTCTTAGGC	TCTCTGGGCCTGTGTCTTAGGCT	23	0	0	8	0	0	15	0	0	0	0	0	0.347826	0	0	0.652174	0	0	0
hsa-miR-365a-3p	TAATGCCCCTAAAAATCCTTAT	TAATGCCCCTAAAAATCCTTATT	10	1	0	0	3	0	6	0	0	0	0.1	0	0	0.3	0	0.6	0	0	0
hsa-miR-451a	AAACCGTTACCATTACTGAGTT	AAACCGTTACCATTACTGAGTTT	2	1	0	0	0	0	1	0	0	0	0.5	0	0	0	0	0.5	0	0	0
hsa-miR-509-5p	TACTGCAGACAGTGGCAATCA	TACTGCAGACAGTGGCAATCAT	2	0	0	0	0	0	1	1	0	0	0	0	0	0	0	0.5	0.5	0	0
hsa-miR-3615	TCTCTCGGCTCCTCGCGGCTC	TCTCTCGGCTCCTCGCGGCTCGC	29	0	0	0	1	0	11	17	0	0	0	0	0	0.0344828	0	0.37931	0.586207	0	0
hsa-miR-2467-5p	TGAGGCTCTGTTAGCCTTGGCTC	TGAGGCTCTGTTAGCCTTGGCT	16	0	0	0	11	0	5	0	0	0	0	0	0	0.6875	0	0.3125	0	0	0
hsa-miR-589-5p	TGAGAACCACGTCTGCTCTGAG	TGAGAACCACGTCTGCTCTGA	55	0	0	2	38	0	15	0	0	0	0	0	0.0363636	0.690909	0	0.272727	0	0	0
hsa-miR-2110	TTGGGGAAACGGCCGCTGAGTG	TTGGGGAAACGGCCGCTGAGTGAG	5	0	0	0	0	0	1	4	0	0	0	0	0	0	0	0.2	0.8	0	0
hsa-miR-342-5p	AGGGGTGCTATCTGTGATTGA	AGGGGTGCTATCTGTGATTGAGG	10	0	0	0	0	0	2	6	0	2	0	0	0	0	0	0.2	0.6	0	0.2
hsa-miR-452-5p	AACTGTTTGCAGAGGAAACTGA	AACTGTTTGCAGAGGAAACTGAGA	39	0	0	0	1	0	2	36	0	0	0	0	0	0.025641	0	0.0512821	0.923077	0	0
hsa-miR-224-5p	CAAGTCACTAGTGGTTCCGTT	CAAGTCACTAGTGGTTCCGTTTAG	43	0	0	1	0	0	2	1	39	0	0	0	0.0232558	0	0	0.0465116	0.0232558	0.906977	0
hsa-let-7f-1-3p	CTATACAATCTATTGCCTTCCC	CTATACAATCTATTGCCTTCC	9	0	0	0	9	0	0	0	0	0	0	0	0	1	0	0	0	0	0
hsa-miR-105-3p	ACGGATGTTTGAGCATGTGCTA	ACGGATGTTTGAGCATGTGCT	4	0	0	0	4	0	0	0	0	0	0	0	0	1	0	0	0	0	0
hsa-miR-10a-3p	CAAATTCGTATCTAGGGGAATA	CAAATTCGTATCTAGGGGAAT	15	0	0	0	15	0	0	0	0	0	0	0	0	1	0	0	0	0	0
hsa-miR-133a-3p	TTTGGTCCCCTTCAACCAGCTG	TTTGGTCCCCTTCAACCAGCT	1	0	0	0	1	0	0	0	0	0	0	0	0	1	0	0	0	0	0
hsa-miR-135a-5p	TATGGCTTTTTATTCCTATGTGA	TATGGCTTTTTATTCCTATGTG	2	0	0	0	2	0	0	0	0	0	0	0	0	1	0	0	0	0	0
hsa-miR-138-1-3p	GCTACTTCACAACACCAGGGCC	GCTACTTCACAACACCAGGGC	9	0	0	0	9	0	0	0	0	0	0	0	0	1	0	0	0	0	0
hsa-miR-203b-3p	TTGAACTGTTAAGAACCACTGGA	TTGAACTGTTAAGAACCACTGG	1	0	0	0	1	0	0	0	0	0	0	0	0	1	0	0	0	0	0
hsa-miR-206	TGGAATGTAAGGAAGTGTGTGG	TGGAATGTAAGGAAGTGTGTG	1	0	0	0	1	0	0	0	0	0	0	0	0	1	0	0	0	0	0
hsa-miR-302a-5p	ACTTAAACGTGGATGTACTTGCT	ACTTAAACGTGGATGTACTTGC	1	0	0	0	1	0	0	0	0	0	0	0	0	1	0	0	0	0	0
hsa-miR-3129-3p	AAACTAATCTCTACACTGCTGC	AAACTAATCTCTACACTGCTG	2	0	0	0	2	0	0	0	0	0	0	0	0	1	0	0	0	0	0
hsa-miR-3129-5p	GCAGTAGTGTAGAGATTGGTTT	GCAGTAGTGTAGAGATTGGTT	2	0	0	0	2	0	0	0	0	0	0	0	0	1	0	0	0	0	0
hsa-miR-32-3p	CAATTTAGTGTGTGTGATATTT	CAATTTAGTGTGTGTGATATT	9	0	0	0	9	0	0	0	0	0	0	0	0	1	0	0	0	0	0
hsa-miR-331-5p	CTAGGTATGGTCCCAGGGATCC	CTAGGTATGGTCCCAGGGATC	4	0	0	0	4	0	0	0	0	0	0	0	0	1	0	0	0	0	0
hsa-miR-3940-3p	CAGCCCGGATCCCAGCCCACTT	CAGCCCGGATCCCAGCCCACT	1	0	0	0	1	0	0	0	0	0	0	0	0	1	0	0	0	0	0
hsa-miR-431-5p	TGTCTTGCAGGCCGTCATGCA	TGTCTTGCAGGCCGTCATGC	4	0	0	0	4	0	0	0	0	0	0	0	0	1	0	0	0	0	0
hsa-miR-4443	TTGGAGGCGTGGGTTTT	TTGGAGGCGTGGGTTT	1	0	0	0	1	0	0	0	0	0	0	0	0	1	0	0	0	0	0
hsa-miR-503-3p	GGGGTATTGTTTCCGCTGCCAGG	GGGGTATTGTTTCCGCTGCCAG	2	0	0	0	2	0	0	0	0	0	0	0	0	1	0	0	0	0	0
hsa-miR-512-3p	AAGTGCTGTCATAGCTGAGGTC	AAGTGCTGTCATAGCTGAGGT	1	0	0	0	1	0	0	0	0	0	0	0	0	1	0	0	0	0	0
hsa-miR-516a-5p	TTCTCGAGGAAAGAAGCACTTTC	TTCTCGAGGAAAGAAGCACTTT	1	0	0	0	1	0	0	0	0	0	0	0	0	1	0	0	0	0	0
hsa-miR-517a-3p	ATCGTGCATCCCTTTAGAGTGT	ATCGTGCATCCCTTTAGAGTG	1	0	0	0	1	0	0	0	0	0	0	0	0	1	0	0	0	0	0
hsa-miR-518a-3p	GAAAGCGCTTCCCTTTGCTGGA	GAAAGCGCTTCCCTTTGCTGG	1	0	0	0	1	0	0	0	0	0	0	0	0	1	0	0	0	0	0
hsa-miR-519d-3p	CAAAGTGCCTCCCTTTAGAGTG	CAAAGTGCCTCCCTTTAGAGT	1	0	0	0	1	0	0	0	0	0	0	0	0	1	0	0	0	0	0
hsa-miR-520d-5p	CTACAAAGGGAAGCCCTTTC	CTACAAAGGGAAGCCCTTT	1	0	0	0	1	0	0	0	0	0	0	0	0	1	0	0	0	0	0
hsa-miR-542-5p	TCGGGGATCATCATGTCACGAGA	TCGGGGATCATCATGTCACGAG	2	0	0	0	2	0	0	0	0	0	0	0	0	1	0	0	0	0	0
hsa-miR-548u	CAAAGACTGCAATTACTTTTGCG	CAAAGACTGCAATTACTTTTGC	4	0	0	0	4	0	0	0	0	0	0	0	0	1	0	0	0	0	0
hsa-miR-556-3p	ATATTACCATTAGCTCATCTTT	ATATTACCATTAGCTCATCTT	4	0	0	0	4	0	0	0	0	0	0	0	0	1	0	0	0	0	0
hsa-miR-556-5p	GATGAGCTCATTGTAATATGAG	GATGAGCTCATTGTAATATGA	1	0	0	0	1	0	0	0	0	0	0	0	0	1	0	0	0	0	0
hsa-miR-615-3p	TCCGAGCCTGGGTCTCCCTCTT	TCCGAGCCTGGGTCTCCCTCT	12	0	0	0	12	0	0	0	0	0	0	0	0	1	0	0	0	0	0
hsa-miR-584-5p	TTATGGTTTGCCTGGGACTGAG	TTATGGTTTGCCTGGGACTGA	24	1	0	0	23	0	0	0	0	0	0.0416667	0	0	0.958333	0	0	0	0	0
hsa-miR-450b-5p	TTTTGCAATATGTTCCTGAATA	TTTTGCAATATGTTCCTGAAT	24	0	0	2	22	0	0	0	0	0	0	0	0.0833333	0.916667	0	0	0	0	0
hsa-miR-1260b	ATCCCACCACTGCCACCAT	ATCCCACCACTGCCACCA	34	0	0	3	31	0	0	0	0	0	0	0	0.0882353	0.911765	0	0	0	0	0
hsa-let-7b-3p	CTATACAACCTACTGCCTTCCC	CTATACAACCTACTGCCTTCC	4	0	0	1	3	0	0	0	0	0	0	0	0.25	0.75	0	0	0	0	0
hsa-miR-222-5p	CTCAGTAGCCAGTGTAGATCCT	CTCAGTAGCCAGTGTAGATCC	7	0	0	3	4	0	0	0	0	0	0	0	0.428571	0.571429	0	0	0	0	0
hsa-miR-143-5p	GGTGCAGTGCTGCATCTCTGGT	GGTGCAGTGCTGCATCTCTGG	2	0	0	1	1	0	0	0	0	0	0	0	0.5	0.5	0	0	0	0	0
hsa-miR-185-3p	AGGGGCTGGCTTTCCTCTGGTC	AGGGGCTGGCTTTCCTCTGGT	2	1	0	0	1	0	0	0	0	0	0.5	0	0	0.5	0	0	0	0	0
hsa-miR-744-3p	CTGTTGCCACTAACCTCAACCT	CTGTTGCCACTAACCTCAACC	2	0	0	1	1	0	0	0	0	0	0	0	0.5	0.5	0	0	0	0	0
hsa-miR-9-3p	ATAAAGCTAGATAACCGAAAGT	ATAAAGCTAGATAACCGAAAG	2	0	1	0	1	0	0	0	0	0	0	0.5	0	0.5	0	0	0	0	0
hsa-miR-147b	GTGTGCGGAAATGCTTCTGCTA	GTGTGCGGAAATGCTTCTG	10	0	8	0	2	0	0	0	0	0	0	0.8	0	0.2	0	0	0	0	0
hsa-miR-654-3p	TATGTCTGCTGACCATCACCTT	TATGTCTGCTGACCATCACC	9	0	0	8	1	0	0	0	0	0	0	0	0.888889	0.111111	0	0	0	0	0
hsa-miR-877-5p	GTAGAGGAGATGGCGCAGGG	GTAGAGGAGATGGCGCAGGGGAC	45	0	0	0	2	0	0	4	25	14	0	0	0	0.0444444	0	0	0.0888889	0.555556	0.311111
hsa-miR-1276	TAAAGAGCCCTGTGGAGACA	TAAAGAGCCCTGTGGAGACACC	1	0	0	0	0	0	0	1	0	0	0	0	0	0	0	0	1	0	0
hsa-miR-501-5p	AATCCTTTGTCCCTGGGTGAGA	AATCCTTTGTCCCTGGGTGAGAGT	3	0	0	0	0	0	0	3	0	0	0	0	0	0	0	0	1	0	0
hsa-miR-548ah-5p	AAAAGTGATTGCAGTGTTTG	AAAAGTGATTGCAGTGTTTGCC	2	0	0	0	0	0	0	2	0	0	0	0	0	0	0	0	1	0	0
hsa-miR-887-3p	GTGAACGGGCGCCATCCCGAGG	GTGAACGGGCGCCATCCCGAGGCT	3	0	0	0	0	0	0	3	0	0	0	0	0	0	0	0	1	0	0
hsa-miR-92b-5p	AGGGACGGGACGCGGTGCAGTG	AGGGACGGGACGCGGTGCAGTGTT	5	0	0	0	0	0	0	5	0	0	0	0	0	0	0	0	1	0	0
hsa-miR-29c-5p	TGACCGATTTCTCCTGGTGTTC	TGACCGATTTCTCCTGGTGTTCAG	2	0	1	0	0	0	0	1	0	0	0	0.5	0	0	0	0	0.5	0	0
hsa-miR-3176	ACTGGCCTGGGACTACCGG	ACTGGCCTGGGACTACCGGGGG	10	0	0	0	0	0	0	1	8	1	0	0	0	0	0	0	0.1	0.8	0.1
hsa-miR-128-1-5p	CGGGGCCGTAGCACTGTCTGAGA	CGGGGCCGTAGCACTGTCTGA	12	0	0	12	0	0	0	0	0	0	0	0	1	0	0	0	0	0	0
hsa-miR-1283	TCTACAAAGGAAAGCGCTTTCT	TCTACAAAGGAAAGCGCTTT	1	0	0	1	0	0	0	0	0	0	0	0	1	0	0	0	0	0	0
hsa-miR-133a-5p	AGCTGGTAAAATGGAACCAAAT	AGCTGGTAAAATGGAACCAA	1	0	0	1	0	0	0	0	0	0	0	0	1	0	0	0	0	0	0
hsa-miR-144-5p	GGATATCATCATATACTGTAAG	GGATATCATCATATACTGTA	1	0	0	1	0	0	0	0	0	0	0	0	1	0	0	0	0	0	0
hsa-miR-208b-3p	ATAAGACGAACAAAAGGTTTGT	ATAAGACGAACAAAAGGTTT	1	0	0	1	0	0	0	0	0	0	0	0	1	0	0	0	0	0	0
hsa-miR-3180-3p	TGGGGCGGAGCTTCCGGAGGCC	TGGGGCGGAGCTTCCGGAGG	1	0	0	1	0	0	0	0	0	0	0	0	1	0	0	0	0	0	0
hsa-miR-320e	AAAGCTGGGTTGAGAAGG	AAAGCTGGGTTGAGAA	1	0	0	1	0	0	0	0	0	0	0	0	1	0	0	0	0	0	0
hsa-miR-33b-3p	CAGTGCCTCGGCAGTGCAGCCC	CAGTGCCTCGGCAGTGCAGC	1	0	0	1	0	0	0	0	0	0	0	0	1	0	0	0	0	0	0
hsa-miR-377-3p	ATCACACAAAGGCAACTTTTGT	ATCACACAAAGGCAACTTTT	1	0	0	1	0	0	0	0	0	0	0	0	1	0	0	0	0	0	0
hsa-miR-378d	ACTGGACTTGGAGTCAGAAA	ACTGGACTTGGAGTCAGA	18	0	0	18	0	0	0	0	0	0	0	0	1	0	0	0	0	0	0
hsa-miR-449c-5p	TAGGCAGTGTATTGCTAGCGGCTGT	TAGGCAGTGTATTGCTAGCGGCT	4	0	0	4	0	0	0	0	0	0	0	0	1	0	0	0	0	0	0
hsa-miR-509-3p	TGATTGGTACGTCTGTGGGTAG	TGATTGGTACGTCTGTGGGT	1	0	0	1	0	0	0	0	0	0	0	0	1	0	0	0	0	0	0
hsa-miR-517b-3p	ATCGTGCATCCCTTTAGAGTGT	ATCGTGCATCCCTTTAGAGT	1	0	0	1	0	0	0	0	0	0	0	0	1	0	0	0	0	0	0
hsa-miR-517c-3p	ATCGTGCATCCTTTTAGAGTGT	ATCGTGCATCCTTTTAGAGT	1	0	0	1	0	0	0	0	0	0	0	0	1	0	0	0	0	0	0
hsa-miR-518b	CAAAGCGCTCCCCTTTAGAGGT	CAAAGCGCTCCCCTTTAGAG	1	0	0	1	0	0	0	0	0	0	0	0	1	0	0	0	0	0	0
hsa-miR-519a-3p	AAAGTGCATCCTTTTAGAGTGT	AAAGTGCATCCTTTTAGAGT	1	0	0	1	0	0	0	0	0	0	0	0	1	0	0	0	0	0	0
hsa-miR-519c-3p	AAAGTGCATCTTTTTAGAGGAT	AAAGTGCATCTTTTTAGAGG	1	0	0	1	0	0	0	0	0	0	0	0	1	0	0	0	0	0	0
hsa-miR-520a-5p	CTCCAGAGGGAAGTACTTTCT	CTCCAGAGGGAAGTACTTT	1	0	0	1	0	0	0	0	0	0	0	0	1	0	0	0	0	0	0
hsa-miR-521	AACGCACTTCCCTTTAGAGTGT	AACGCACTTCCCTTTAGAGT	1	0	0	1	0	0	0	0	0	0	0	0	1	0	0	0	0	0	0
hsa-miR-522-3p	AAAATGGTTCCCTTTAGAGTGT	AAAATGGTTCCCTTTAGAGT	1	0	0	1	0	0	0	0	0	0	0	0	1	0	0	0	0	0	0
hsa-miR-525-5p	CTCCAGAGGGATGCACTTTCT	CTCCAGAGGGATGCACTTT	1	0	0	1	0	0	0	0	0	0	0	0	1	0	0	0	0	0	0
hsa-miR-526b-5p	CTCTTGAGGGAAGCACTTTCTGT	CTCTTGAGGGAAGCACTTTCT	1	0	0	1	0	0	0	0	0	0	0	0	1	0	0	0	0	0	0
hsa-miR-548p	TAGCAAAAACTGCAGTTACTTT	TAGCAAAAACTGCAGTTACT	2	0	0	2	0	0	0	0	0	0	0	0	1	0	0	0	0	0	0
hsa-miR-573	CTGAAGTGATGTGTAACTGATCAG	CTGAAGTGATGTGTAACTGATC	1	0	0	1	0	0	0	0	0	0	0	0	1	0	0	0	0	0	0
hsa-miR-665	ACCAGGAGGCTGAGGCCCCT	ACCAGGAGGCTGAGGCCC	2	0	0	2	0	0	0	0	0	0	0	0	1	0	0	0	0	0	0
hsa-miR-1268b	CGGGCGTGGTGGTGGGGGTG	CGGGCGTGGTGGTGGGGG	21	0	2	19	0	0	0	0	0	0	0	0.0952381	0.904762	0	0	0	0	0	0
hsa-miR-3180	TGGGGCGGAGCTTCCGGAG	TGGGGCGGAGCTTCCGGAGGCC	1	0	0	0	0	0	0	0	1	0	0	0	0	0	0	0	0	1	0
hsa-miR-4521	GCTAAGGAAGTCCTGTGCTCAG	GCTAAGGAAGTCCTGTGCTCAGTTT	9	0	0	0	0	0	0	0	9	0	0	0	0	0	0	0	0	1	0
hsa-miR-7976	TGCCCTGAGACTTTTGCTC	TGCCCTGAGACTTTTGCTCTAA	4	0	0	0	0	0	0	0	4	0	0	0	0	0	0	0	0	1	0
hsa-miR-4326	TGTTCCTCTGTCTCCCAGAC	TGTTCCTCTGTCTCCCAGACTCTG	16	0	0	0	0	0	0	0	1	15	0	0	0	0	0	0	0	0.0625	0.9375
hsa-miR-144-3p	TACAGTATAGATGATGTACT	TACAGTATAGATGATGT	1	0	1	0	0	0	0	0	0	0	0	1	0	0	0	0	0	0	0
hsa-miR-199b-3p	ACAGTAGTCTGCACATTGGTTA	ACAGTAGTCTGCACATTGG	9	0	9	0	0	0	0	0	0	0	0	1	0	0	0	0	0	0	0
hsa-miR-203a-5p	AGTGGTTCTTAACAGTTCAACAGTT	AGTGGTTCTTAACAGTTCAACA	3	0	3	0	0	0	0	0	0	0	0	1	0	0	0	0	0	0	0
hsa-miR-506-3p	TAAGGCACCCTTCTGAGTAGA	TAAGGCACCCTTCTGAGT	1	0	1	0	0	0	0	0	0	0	0	1	0	0	0	0	0	0	0
hsa-miR-508-3p	TGATTGTAGCCTTTTGGAGTAGA	TGATTGTAGCCTTTTGGAGT	1	0	1	0	0	0	0	0	0	0	0	1	0	0	0	0	0	0	0
hsa-miR-511-3p	AATGTGTAGCAAAAGACAGA	AATGTGTAGCAAAAGAC	1	0	1	0	0	0	0	0	0	0	0	1	0	0	0	0	0	0	0
hsa-miR-512-5p	CACTCAGCCTTGAGGGCACTTTC	CACTCAGCCTTGAGGGCACT	1	0	1	0	0	0	0	0	0	0	0	1	0	0	0	0	0	0	0
hsa-miR-514a-3p	ATTGACACTTCTGTGAGTAGA	ATTGACACTTCTGTGAGT	1	0	1	0	0	0	0	0	0	0	0	1	0	0	0	0	0	0	0
hsa-miR-515-5p	TTCTCCAAAAGAAAGCACTTTCTG	TTCTCCAAAAGAAAGCACTTT	1	0	1	0	0	0	0	0	0	0	0	1	0	0	0	0	0	0	0
hsa-miR-524-5p	CTACAAAGGGAAGCACTTTCTC	CTACAAAGGGAAGCACTTT	1	0	1	0	0	0	0	0	0	0	0	1	0	0	0	0	0	0	0
hsa-miR-664a-3p	TATTCATTTATCCCCAGCCTACA	TATTCATTTATCCCCAGCCT	1	0	1	0	0	0	0	0	0	0	0	1	0	0	0	0	0	0	0
hsa-miR-548f-3p	AAAAACTGTAATTACTTTT	AAAAACTGTAATTACTTTTGGAC	2	0	0	0	0	0	0	0	0	2	0	0	0	0	0	0	0	0	1
hsa-miR-1277-5p	AAATATATATATATATGTACGTAT	AAATATATATATATATGTAC	4	4	0	0	0	0	0	0	0	0	1	0	0	0	0	0	0	0	0
hsa-miR-133b	TTTGGTCCCCTTCAACCAGCTA	TTTGGTCCCCTTCAACCA	1	1	0	0	0	0	0	0	0	0	1	0	0	0	0	0	0	0	0
hsa-miR-202-5p	TTCCTATGCATATACTTCTTTG	TTCCTATGCATATACTTC	1	1	0	0	0	0	0	0	0	0	1	0	0	0	0	0	0	0	0
hsa-miR-23c	ATCACATTGCCAGTGATTACCC	ATCACATTGCCAGTGATT	1	1	0	0	0	0	0	0	0	0	1	0	0	0	0	0	0	0	0
hsa-miR-338-5p	AACAATATCCTGGTGCTGAGTG	AACAATATCCTGGTGCTG	1	1	0	0	0	0	0	0	0	0	1	0	0	0	0	0	0	0	0
hsa-miR-378c	ACTGGACTTGGAGTCAGAAGAGTGG	ACTGGACTTGGAGTCAGAAGA	28	28	0	0	0	0	0	0	0	0	1	0	0	0	0	0	0	0	0
hsa-miR-500b-5p	AATCCTTGCTACCTGGGT	AATCCTTGCTACCT	1	1	0	0	0	0	0	0	0	0	1	0	0	0	0	0	0	0	0
hsa-miR-518c-3p	CAAAGCGCTTCTCTTTAGAGTGT	CAAAGCGCTTCTCTTTAGA	1	1	0	0	0	0	0	0	0	0	1	0	0	0	0	0	0	0	0
hsa-miR-525-3p	GAAGGCGCTTCCCTTTAGAGCG	GAAGGCGCTTCCCTTTAG	1	1	0	0	0	0	0	0	0	0	1	0	0	0	0	0	0	0	0
hsa-miR-7641	TTGATCTCGGAAGCTAAGC	TTGATCTCGGAAGCT	1	1	0	0	0	0	0	0	0	0	1	0	0	0	0	0	0	0	0
