# Supplementary material for: Toward the human cellular microRNAome
Source: HighWire-hosted journal article supplement (doi:10.1101/gr.222067.117), 2017-09-06
Supplement: Supplemental_Table_S14.xlsx [file Supplemental_Table_S14.xlsx]

## Sheet: Sheet1
Sample	Cellname	Cell type code	Lonza catalog #	Media	SRR Name
JH-01	Astrocytes	NH-A	CC-2565	ABM	SRR5127214
JH-02	Bronchial Epithelial Cells	NHBE	CC-2541	BEBM	SRR5127216
JH-03	Articular Chondrocytes	NHAC	CC-2550	CGM	SRR5127229
JH-04	UmbilicalVeinEndothelialcells	HUVEC	C2517A	EBM	SRR5127213
JH-05	MicrovascularEndothelialCells	HMVEC	CC-2527	EBM	SRR5127201
JH-06	Adult Dermal Fibroblast	NHDF-Ad	CC-2511	FGM-2	SRR5127205
JH-07	Neonatal Dermal Fibroblast	NHDF-neo	CC-2509	FGM-2	SRR5127225
JH-08	Cardiac Fibroblasts	NHCF-V	CC-2904	FGM-3	SRR5127236
JH-10	Adult Epidermal Keratinocytes	NHEK-Ad	192627	KBM-Gold	SRR5127203
JH-11	Neonatal Epidermal Keratinocytes	NHEK-neo	192907	KBM-Gold	SRR5127208
JH-12	Melanocyte	Melano	CC-2586	MBM	SRR5127207
JH-13	Mammary Epithelial Cells	HMEC	CC-2551	MEBM	SRR5127224
JH-14	Mesangial Cells	NHMC	CC-2559	MsBM	SRR5127221
JH-15	Osteoblasts	NHOst	CC-2538	OBM	SRR5127233
JH-16	Prostate Epithelial Cells	PrEC	CC-2555	PrEBM	SRR5127212
JH-17	Renal Cortical Epithelial Cells	HRCEpiC	CC-2554	REBM	SRR5127204
JH-18	Renal Epithelial Cells	HRE	CC-2556	REBM	SRR5127235
JH-19	Renal Proximal Tubule Cells	RPTEC	CC-2553	REBM	SRR5127230
JH-20	Retinal Pigment Epithelial Cells	HRPEpiC	194987	RtEBM	SRR5127210
JH-21	Aortic Adventitial Fibroblasts	AoAF	CC-7014	SCBM	SRR5127206
JH-22	Periodontal Ligament Fibroblasts	HPdLF	CC-7049	SCBM	SRR5127227
JH-23	Prostate Stromal Cells	PrSC	CC-2508	SCBM	SRR5127226
JH-24	Skeletal Muscle Myoblasts	HSMM	CC-2580	SkBM-2	SRR5127218
JH-25	Skeletal Muscle Cells	SKMC	CC-2561	SkBM	SRR5127202
JH-26	Aortic Smooth Muscle Cells	AoSMC	CC-2571	SmBM	SRR5127217
JH-27	Intestinal Epithelial Cells	InEPC	CC-2931	SmBM	SRR5127223
JH-28	Myofibroblasts	InMyoFib	CC-2902	SmBM	SRR5127220
JH-29	Prostate Smooth Muscle Cells	PrSMC	CC-2587	SmBM-2	SRR5127222
JH-30	Bladder Smooth Muscle Cells	BdSMC	CC-2533	SmBM-2	SRR5127215
