# Supplementary material for: Toward the human cellular microRNAome
Source: HighWire-hosted journal article supplement (doi:10.1101/gr.222067.117), 2017-09-06
Supplement: Supplemental_Table_S15.xlsx [file Supplemental_Table_S15.xlsx]

## Sheet: Sheet1
SRA Name	Cell/tissue	Total Input Reads	All Trimmed Reads	Unique Trimmed Reads	All miRNA Reads	Filtered miRNA Reads	Unique miRNAs	Hairpin Reads	Other Noncoding RNA Reads	mRNA Reads	Remaining Reads
SRR580352	BCBL-1	19183288	19128077	402100	432142	400933	247		4760232	2480034	11455669
SRR580353	BCBL-1	31563817	31492732	505753	550787	504319	311		5893729	3638165	21410051
SRR580354	BCBL-1	18541877	11461434	408473	283759	263141	155		2707082	4399946	4070647
SRR580355	BCBL-1	23367312	17525547	446014	383252	350690	204		4042329	5152364	7947602
SRR580356	BC-3	20534339	14279101	370559	240202	215301	172		2033927	3688619	8316353
SRR580357	BC-3	16414780	10947287	437240	282603	264119	189		1898679	3110053	5655952
SRR580358	BC-3	22127319	15984933	421222	250729	224481	175		2667077	3661456	9405671
SRR580359	BC-3	25952152	25740401	210392	5579613	5563363	366		151972	101335	19907481
SRR580360	BC-3	21375260	21125042	126521	4757792	4751678	410		225050	70751	16071449
SRR580361	BC-3	22428468	22321297	95176	4339933	4329528	321		120996	74257	17786111
SRR580362	BCBL-1	25335755	25230754	130645	17414902	17401450	438		439443	154803	7221606
SRR580363	BCBL-1	24207261	24084868	102222	18193557	18184190	382		302372	152715	5436224
SRR048973	HEK293	4155911	3071296	988493	308340	147464	300	3422	130771	75212	2553551
SRR048974	HEK293	4588647	3287371	257513	228370	29104	227	138	41085	93413	2924365
SRR048975	HEK293	4122692	1322094	455370	428047	382466	424	510	94494	50715	748328
SRR048976	HEK293	6434465	4556784	1631910	1090664	805567	435	7120	177007	89613	3192380
SRR048977	HEK293	4856438	343209	64034	37029	7272	166	20	5450	58045	242665
SRR048978	HEK293	3779615	1409935	560803	396471	330991	420	278	33429	65166	914591
SRR048979	HEK293	5910153	3740845	952462	430680	114801	336	971	364528	102468	2842198
SRR1024131	Brain	1233696	801843	418937	176835	163539	365	855	89802	170307	364044
SRR1024132	Brain	1168506	954197	379739	179758	169283	364	927	108843	209039	455630
SRR1024133	Brain	1961999	1698016	288802	184045	176345	329	4461	507207	315697	686606
SRR1024134	Brain	15921138	12802137	1006824	2001494	1586420	437	9630	2016890	1830059	6944064
SRR1024135	Brain	3805147	3472236	769103	527574	507776	414	3350	362819	642890	1935603
SRR1024136	Brain	22253399	19154063	916716	5757216	5623278	458	19742	3395788	3131714	6849603
SRR1024137	Brain	1195306	1134892	193031	301361	298625	367	2327	347857	147760	335587
SRR1024138	Brain	1874447	1185844	475973	48069	39030	264	2016	257267	246852	631640
SRR1024139	Brain	2308762	2179835	282207	45442	37385	275	4031	501080	547546	1081736
SRR1024140	Brain	2582951	2113824	376928	343548	301534	303	2584	218675	396282	1152735
SRR1024141	Brain	2370719	1897466	494437	401770	376684	409	1782	217674	395256	880984
SRR1304305	HEK293	22645909	22455636	409597	20577179	20549643	1228	252924	678102	116083	831348
SRR1304306	HEK293	30292083	29966506	666639	26283677	26244669	1287	443241	1435557	224743	1579288
SRR1304308	C8166T	16718387	16604204	217914	16027651	16018573	960	150554	200459	38870	186670
SRR1304310	A549	21990199	21673247	596200	19638733	19623969	1046	123245	1157023	219996	534250
SRR1304312	SH-SY5Y	15238577	15200563	181034	14831430	14819095	899	11925	111376	28282	217550
SRR1304314	LCL B-cell	30698328	29594580	424260	25869416	25824486	1009	74312	1279747	58781	2312324
SRR1535090	MDA-MB-231	2992097	2891220	690230	8722	4357	92		552071	1237991	1092436
SRR1535091	MDA-MB-231	4779647	4512201	891754	12496	6046	96		1057128	1742757	1699820
SRR1535092	MDA-MB-231	3414315	3316379	509442	13065	7698	101		412605	1358772	1531937
SRR1535094	MDA-MB-231	1820465	1775825	327601	4332	1695	55		280971	784255	706267
SRR1690967	Fibroblast	41397854	33401087	2747125	21608432	21394356	1112	30219	908723	1271229	9582484
SRR1690968	Fibroblast	46974039	40995650	2452433	20423434	20055509	986	57836	1125177	2028356	17360847
SRR1690969	Fibroblast	41603922	34871656	3228318	13395774	13096738	1132	40916	892282	955337	19587347
SRR1822503	HPNE	164429881	164179891	18423504	1406477	1323811	656		95378400	2075869	65319145
SRR1822504	HPNE	128980463	128979659	5019867	6657650	6357566	376		17409309	5141821	99770879
SRR1822505	HPNE	152008497	151956432	13212645	10763389	10471209	616		6561547	600135	134031361
SRR1822507	HPNE	158899117	158899055	10373846	11887046	11407011	618		14093370	1427884	131490755
SRR1822508	MiaPaCA	85743056	36962943	19473794	2173230	2032652	528	18044	3961405	1399015	29411249
SRR1822509	MiaPaCA	154710924	154710576	21498878	14061187	13499838	697		11847976	2072633	126728780
SRR1822510	MiaPaCA	161564558	161545977	14826693	4630636	4202537	523		10628242	2720688	143566411
SRR1822511	Brain	161050100	160807641	9078074	6182572	5901228	620		1302371	466555	152856143
SRR1822512	Brain	161499968	161221489	9686372	26904016	26400552	695		4188487	471039	129657947
SRR1822513	Brain	145987868	145752469	10307442	12460341	12279207	491		2296039	246302	130749787
SRR3106071	Huh-7.5	46991200	42114932	1046339	1599118	1517058	342		5571929	8901510	26042375
SRR3106122	HeLa	5892598	5792136	521063	287161	277630	124	30006	255110	351618	4868241
SRR3106127	HeLa	7468074	7138388	175696	1119023	1108576	264		626570	1999307	3393488
SRR3106128	HeLa	12528332	11825685	605337	801760	784697	245		1363146	3049970	6610809
SRR3106129	HeLa	6584144	6165237	151322	1573987	1564904	257		343932	1282402	2964916
SRR3106130	Huh-7.5	11126726	10804028	170575	216869	197323	128		273552	227772	10085835
SRR3106131	Huh-7.5	9976265	9379629	431035	292196	272367	159		474301	445469	8167663
SRR3106132	Huh-7.5	13588765	12900551	681783	588873	552282	165		936295	809465	10565918
SRR3106133	Huh-7.5	7908824	7536312	258823	341086	323594	169		454711	784027	5956488
SRR3106134	Huh-7.5	12464191	11747900	624555	523012	488474	167		802800	651711	9770377
SRR3106135	Huh-7.5	11150681	10518076	312120	580007	555802	181		413314	891690	8633065
SRR3106136	Huh-7	38522227	35968259	756986	1045777	965964	228		3861334	1731787	29329361
SRR3106137	Huh-7	7711202	7487957	89566	1191635	1169244	136		630569	309608	5356145
SRR3106138	Huh-7	7409489	7219627	103414	2190443	2175179	210		480491	573021	3975672
SRR3106139	Huh-7	6816098	6598940	416712	530462	516573	205		166403	277315	5624760
SRR3106144	Huh-7.5	6373935	6231414	167759	228111	216772	110		276112	453745	5273446
SRR3106145	Huh-7.5	8163397	7780715	346971	146894	128133	98		496115	786171	6351535
SRR3106146	Huh-7.5	35155802	33278039	607356	1070963	976743	202		1377738	2748177	28081161
SRR3106147	Huh-7.5	5518086	5377118	182707	304196	289766	153		354555	400330	4318037
SRR3106148	Huh-7.5	9008998	8617755	292248	1143852	1123555	203		530427	827769	6115707
SRR3106149	Huh-7.5	10898642	10550843	287044	886258	868100	298		1374053	3382644	4907888
SRR3106150	Huh-7.5	15905686	15216748	348921	1174606	1155618	266		1841939	5390186	6810017
SRR3106151	Huh-7.5	12092503	11553842	292976	935597	916873	268		1201765	3744477	5672003
SRR3106152	Huh-7.5	12076694	11700717	299835	931190	921377	273		1349892	4133848	5285787
SRR3106153	Huh-7.5	5292889	5165605	98808	383348	368413	135		426978	342671	4012608
SRR3106154	Huh-7.5	3322411	3246757	67350	89320	74003	86		351369	312292	2493776
SRR3106155	Huh-7.5	9687638	9371881	163113	274750	247081	135		1164888	767975	7164268
SRR3106156	Huh-7.5	13923045	13087896	784657	1120982	1084973	231		1136076	997496	9833342
SRR3106157	A549	7694953	7423621	70794	113056	104112	130		22210	23310	7265045
SRR3106158	A549	12048316	11160564	661720	997195	958497	199		770113	465646	8927610
SRR3106159	A549	5587465	5435104	168027	303684	286509	156		468021	464167	4199232
SRR3106160	A549	6699426	6531448	122996	886010	864378	150		518060	545780	4581598
SRR578611	HS27a	25128793	18250425	237677	7995794	7829628	97	35556	464752	3255862	6498461
SRR578612	HS5	27234229	16796811	1743389	6738767	6615458	380	24343	1124598	3672455	5236648
SRR578613	HS5	30959244	23563968	1890729	6962697	6890658	353	57357	2608717	9360940	4574257
SRR578614	HS27a	30810431	23063659	843319	12039690	11956273	341	141143	3555865	4396195	2930766
SRR578615	HUVEC	14086106	4586655	1094930	103735	45619	219	7392	2455811	921189	1098528
SRR578616	HS5	13013123	3229544	803439	1193298	883477	412	11628	704167	354809	965642
SRR578617	HS27a	13605446	3951060	535807	2011378	1852615	429	14403	688672	346025	890582
SRR578618	hMSC	8523247	2593723	467192	881944	844356	357	5634	419197	623466	663482
SRR578619	HUVEC	18888791	4728512	1051821	1150220	1031658	425	43663	1735367	428627	1370635
SRR578620	TrHBMEC	9201298	4125660	326824	383810	32348	64	12810	1255609	443034	2030397
SRR578621	hMSC	10011959	3794778	142418	676277	400570	87	7453	1090766	744365	1275917
SRR578622	hMSC	10559848	5284922	220148	636836	328553	128	7082	1306598	1264532	2069874
SRR578623	hMSC	10075569	4947587	121254	1155727	749739	122	15156	821119	1919886	1035699
SRR578624	hMSC	8876824	4203499	148892	514240	254769	107	9680	1453136	1008547	1217896
SRR578625	TrHBMEC	10730033	3270174	99355	907703	205262	92	8669	929741	640272	783789
SRR578626	TrHBMEC	9294574	4228464	119829	1449328	989933	166	32336	915565	879340	951895
SRR592686	LCL B-cell	12382044	11501066	1042170	335030	307814	187	1310	534463	82967	10547296
SRR592687	LCL B-cell	14322331	4997289	916411	93724	77339	141	5028	199713	46610	4652214
SRR592688	LCL B-cell	12919416	10211851	912200	129630	113463	134	8356	673139	60038	9340688
SRR592689	LCL B-cell	13154432	10638716	1172913	528981	482408	233	6152	587933	49576	9466074
							Average
		2806362313	2519618333	184612586	411177099	400019712	343.171	1752537	265711617	140512016	1700465064
							264
							Median

## Sheet: Sheet2
A549
BC-3
BCBL-1
Brain
C8166T
Fibroblast
HEK293
HeLa
hMSC
HPNE
HS27a
HS5
Huh-7
Huh-7.5
HUVEC
LCL B-cell
MDA-MB-231
MiaPaCA
SH-SY5Y
TrHBMEC
