# Supplementary material for: Toward the human cellular microRNAome
Source: HighWire-hosted journal article supplement (doi:10.1101/gr.222067.117), 2017-09-06
Supplement: Supplemental_Table_S16.xlsx [file Supplemental_Table_S16.xlsx]

## Sheet: Sheet1
JHU miRNA	TJU miRNA match	Ago match	Within a repeat	NovomiRank z-score	Cycles	Annealing Temperature	cDNA Primer	Forward PCR Primer	Reverse PCR Primer
JHU_ID_23828.3p	TJU_CMC_MD2.ID03381.5p-miR	Yes	--	1	36	55	GTCGTATCCAGTGCAGGGTCCGAGGTATTCGCACTGGATACGACGGTCCT	CCAGTTCTGGACACTGACCA	CAGTGCAGGGTCCGAGGT
JHU_ID_20695.3p	TJU_CMC_MD2.ID02828.3p-miR	Yes	--	1.11	39	57	GTCGTATCCAGTGCAGGGTCCAGGTATTCGCACTGGATACGACCCAGAA	GCACCTTTTTGCTGGAACAT	CAGTGCAGGGTCCGAGGT
JHU_ID_06266.5p	TJU_CMC_MD2.ID00806.5p-miR	Yes	MER3 Transcript	0.66	39	55	GTCGTATCCAGTGCAGGGTCCAGGTATTCGCACTGGATACGACAGACAG	TAGCATGTGCCTAGTGGCTG	CAGTGCAGGGTCCGAGGT
JHU_ID_21689.3p	TJU_CMC_MD2.ID02941.3p-miR	No	--	0.79	39	60	GTCGTATCCAGTGCAGGGTCCAGGTATTCGCACTGGATACGACCCTCAG	TCCTAGCCACTGATGAGCCT	CAGTGCAGGGTCCAGGT
JHU_ID_13537.5p	TJU_CMC_MD2.ID01794.5p-miR	Yes	--	1.12	39	55	GTCGTATCCAGTGCAGGGTCCAGGTATTCGCACTGGATACGACACAGCC	AGTCCCCAGACTCTCCCG	CAGTGCAGGGTCCGAGGT
JHU_ID_04870.5p	No	No	HERVH Transcript	0.8	39	55	GTCGTATCCAGTGCAGGGTCCAGGTATTCGCACTGGATACGACGCATCC	CAATTGTCTGATCACTGCGG	CAGTGCAGGGTCCGAGGT
JHU_ID_01488.5p	No	Yes	--	0.69	39	55	GTCGTATCCAGTGCAGGGTCCAGGTATTCGCACTGGATACGACGAACAA	TGGAAGAGGATAGGGTTGTTC	CAGTGCAGGGTCCGAGGT
JHU_ID_01366.3p	No	No	--	1.29	39	55	GTCGTATCCAGTGCAGGGTCCAGGTATTCGCACTGGATACGACCCGCAT	GGTGATGATGAGACTGGCTGAT	CAGTGCAGGGTCCGAGGT
JHU_ID_19550.5p	No	Yes	--	1.38	37	55	GTCGTATCCAGTGCAGGGTCCGAGGTATTCGCACTGGATACGACTGGTGC	TTAATCTCTTCCCGGCCCAT	CAGTGCAGGGTCCAGGT
hsa-miR-21-5p	N/A	N/A	--		39	55	GTCGTATCCAGTGCAGGGTCCAGGTATTCGCACTGGATACGACTCAACA	GCGCGTAGCTTATCAGACTGA	CAGTGCAGGGTCCGAGGT
